# Supplementary material for: Systematic discovery of germline cancer predisposition genes through the identification of somatic second hits
Source: Nat Commun. 2018 Jul 4;9:2601. doi: 10.1038/s41467-018-04900-7 (PMC6031629; doi:10.1038/s41467-018-04900-7)
Supplement: Supplementary file 3 — Supplementary Data 1 [file 41467_2018_4900_MOESM3_ESM.xlsx]

## Sheet: Sheet1
Supplementary Data 1. Sample IDs and cancer types for the 10,043 TCGA cases included in this study.
Sample_ID	Tumor type	Ethnicity
TCGA-AC-A2FE	BRCA	NA/UK
TCGA-CC-A8HS	LIHC	NA/UK
TCGA-HC-8261	PRAD	NA/UK
TCGA-06-0747	GBM	WHITE
TCGA-DM-A1D0	COADREAD	WHITE
TCGA-EB-A5UN	SKCM	WHITE
TCGA-KR-A7K7	LIHC	NA/UK
TCGA-94-7033	LUSC	WHITE
TCGA-49-4512	LUAD	WHITE
TCGA-XF-AAMW	BLCA	WHITE
TCGA-A3-3383	KIRC	WHITE
TCGA-57-1994	OV	WHITE
TCGA-KC-A7FD	PRAD	NA/UK
TCGA-G4-6626	COADREAD	WHITE
TCGA-E2-A14U	BRCA	WHITE
TCGA-HV-A7OL	PAAD	NA/UK
TCGA-AC-A62V	BRCA	BLACK OR AFRICAN AMERICAN
TCGA-AA-3950	COADREAD	NA/UK
TCGA-LL-A5YO	BRCA	BLACK OR AFRICAN AMERICAN
TCGA-EP-A2KA	LIHC	WHITE
TCGA-DD-AAW0	LIHC	NA/UK
TCGA-SX-A7SL	KIRP	NA/UK
TCGA-RY-A840	LGG	NA/UK
TCGA-CQ-A4CA	HNSC	NA/UK
TCGA-G2-A2EK	BLCA	WHITE
TCGA-28-5216	GBM	WHITE
TCGA-78-7167	LUAD	WHITE
TCGA-UY-A9PH	BLCA	NA/UK
TCGA-VD-A8KH	UVM	NA/UK
TCGA-DA-A1I7	SKCM	WHITE
TCGA-AG-A02G	COADREAD	NA/UK
TCGA-64-5774	LUAD	WHITE
TCGA-G3-A25S	LIHC	WHITE
TCGA-QH-A6CU	LGG	WHITE
TCGA-BH-A0EE	BRCA	WHITE
TCGA-W3-AA1O	SKCM	WHITE
TCGA-66-2768	LUSC	NA/UK
TCGA-DU-8162	LGG	WHITE
TCGA-91-6848	LUAD	WHITE
TCGA-VN-A88P	PRAD	NA/UK
TCGA-RW-A8AZ	PCPG	WHITE
TCGA-33-4586	LUSC	WHITE
TCGA-G6-A8L7	KIRC	BLACK OR AFRICAN AMERICAN
TCGA-AB-2850	LAML	BLACK OR AFRICAN AMERICAN
TCGA-RC-A7SF	LIHC	NA/UK
TCGA-CF-A47W	BLCA	ASIAN
TCGA-AJ-A6NU	UCEC	BLACK OR AFRICAN AMERICAN
TCGA-CN-4737	HNSC	WHITE
TCGA-XK-AAJR	PRAD	NA/UK
TCGA-IN-A6RR	STAD	WHITE
TCGA-TQ-A7RW	LGG	NA/UK
TCGA-ER-A3ET	SKCM	WHITE
TCGA-25-1323	OV	WHITE
TCGA-SX-A7SQ	KIRP	WHITE
TCGA-DU-7012	LGG	BLACK OR AFRICAN AMERICAN
TCGA-B6-A0I5	BRCA	WHITE
TCGA-DK-A1AA	BLCA	WHITE
TCGA-AA-3852	COADREAD	NA/UK
TCGA-FA-A7DS	DLBL	ASIAN
TCGA-B5-A11N	UCEC	WHITE
TCGA-HF-7131	STAD	NA/UK
TCGA-MA-AA3X	CESC	BLACK OR AFRICAN AMERICAN
TCGA-EL-A3H3	THCA	WHITE
TCGA-AX-A3G8	UCEC	WHITE
TCGA-D3-A2JN	SKCM	WHITE
TCGA-AA-3858	COADREAD	NA/UK
TCGA-N5-A4RF	UCS	WHITE
TCGA-C5-A1MQ	CESC	WHITE
TCGA-EJ-A65G	PRAD	NA/UK
TCGA-B0-4821	KIRC	ASIAN
TCGA-XF-AAMH	BLCA	WHITE
TCGA-CJ-5678	KIRC	BLACK OR AFRICAN AMERICAN
TCGA-EE-A3AB	SKCM	WHITE
TCGA-AZ-4323	COADREAD	WHITE
TCGA-VD-AA8N	UVM	NA/UK
TCGA-IZ-A6M8	KIRP	BLACK OR AFRICAN AMERICAN
TCGA-CH-5789	PRAD	WHITE
TCGA-FK-A3SH	THCA	WHITE
TCGA-ZG-A9LZ	PRAD	NA/UK
TCGA-CD-A48A	STAD	ASIAN
TCGA-L5-A88Y	ESCA	WHITE
TCGA-73-4677	LUAD	WHITE
TCGA-61-1995	OV	WHITE
TCGA-A8-A0AD	BRCA	NA/UK
TCGA-EE-A29R	SKCM	WHITE
TCGA-2Z-A9JM	KIRP	WHITE
TCGA-IG-A7DP	ESCA	WHITE
TCGA-VQ-A8P8	STAD	BLACK OR AFRICAN AMERICAN
TCGA-ZG-A9LU	PRAD	NA/UK
TCGA-E3-A3E2	THCA	WHITE
TCGA-E9-A1NE	BRCA	WHITE
TCGA-AN-A0FY	BRCA	WHITE
TCGA-CV-6436	HNSC	WHITE
TCGA-AR-A24H	BRCA	WHITE
TCGA-E2-A10A	BRCA	WHITE
TCGA-DU-7292	LGG	WHITE
TCGA-BR-8365	STAD	WHITE
TCGA-17-Z043	LUAD	NA/UK
TCGA-13-1492	OV	WHITE
TCGA-BH-A1FL	BRCA	WHITE
TCGA-CG-5724	STAD	NA/UK
TCGA-FG-7636	LGG	WHITE
TCGA-HC-A6AP	PRAD	NA/UK
TCGA-55-8513	LUAD	WHITE
TCGA-63-A5MY	LUSC	NA/UK
TCGA-J4-A67Q	PRAD	NA/UK
TCGA-BH-A0EI	BRCA	WHITE
TCGA-29-2434	OV	WHITE
TCGA-V4-A9ET	UVM	WHITE
TCGA-QT-A5XM	PCPG	WHITE
TCGA-17-Z014	LUAD	NA/UK
TCGA-N5-A4RO	UCS	BLACK OR AFRICAN AMERICAN
TCGA-AB-2860	LAML	WHITE
TCGA-EY-A3QX	UCEC	WHITE
TCGA-99-7458	LUAD	WHITE
TCGA-AX-A1CK	UCEC	WHITE
TCGA-RC-A6M6	LIHC	NA/UK
TCGA-DX-A6YU	SARC	WHITE
TCGA-VQ-A8E3	STAD	WHITE
TCGA-55-8204	LUAD	WHITE
TCGA-06-0155	GBM	WHITE
TCGA-C5-A2M1	CESC	WHITE
TCGA-EJ-A7NN	PRAD	NA/UK
TCGA-86-8672	LUAD	WHITE
TCGA-EL-A3GY	THCA	WHITE
TCGA-23-1113	OV	WHITE
TCGA-DX-A6BA	SARC	WHITE
TCGA-N9-A4Q8	UCS	WHITE
TCGA-EL-A3CP	THCA	BLACK OR AFRICAN AMERICAN
TCGA-BR-8483	STAD	WHITE
TCGA-A4-A7UZ	KIRP	NA/UK
TCGA-WK-A8XS	SARC	WHITE
TCGA-BP-4801	KIRC	WHITE
TCGA-CV-7245	HNSC	WHITE
TCGA-B6-A0X4	BRCA	WHITE
TCGA-E9-A3X8	BRCA	WHITE
TCGA-MP-A4TC	LUAD	WHITE
TCGA-IN-A6RN	STAD	WHITE
TCGA-OR-A5J4	ACC	WHITE
TCGA-PD-A5DF	LIHC	NA/UK
TCGA-51-6867	LUSC	WHITE
TCGA-D8-A1XM	BRCA	WHITE
TCGA-AG-4007	COADREAD	NA/UK
TCGA-BF-AAP8	SKCM	NA/UK
TCGA-2Z-A9JN	KIRP	BLACK OR AFRICAN AMERICAN
TCGA-76-6191	GBM	WHITE
TCGA-66-2767	LUSC	NA/UK
TCGA-CC-A7IG	LIHC	NA/UK
TCGA-61-1738	OV	BLACK OR AFRICAN AMERICAN
TCGA-L5-A4OT	ESCA	WHITE
TCGA-55-1592	LUAD	WHITE
TCGA-VS-A953	CESC	NA/UK
TCGA-BH-A0C3	BRCA	WHITE
TCGA-G9-6338	PRAD	WHITE
TCGA-A8-A08X	BRCA	NA/UK
TCGA-22-5482	LUSC	WHITE
TCGA-BQ-5875	KIRP	WHITE
TCGA-CV-7253	HNSC	BLACK OR AFRICAN AMERICAN
TCGA-V4-A9F2	UVM	NA/UK
TCGA-HT-7609	LGG	WHITE
TCGA-AA-3488	COADREAD	NA/UK
TCGA-06-5416	GBM	WHITE
TCGA-OR-A5JG	ACC	WHITE
TCGA-BR-6457	STAD	WHITE
TCGA-32-1979	GBM	WHITE
TCGA-MB-A5Y9	SARC	WHITE
TCGA-56-1622	LUSC	WHITE
TCGA-AG-3882	COADREAD	NA/UK
TCGA-EJ-5525	PRAD	WHITE
TCGA-C5-A7UI	CESC	BLACK OR AFRICAN AMERICAN
TCGA-V4-A9F4	UVM	WHITE
TCGA-CW-5581	KIRC	WHITE
TCGA-BR-6801	STAD	WHITE
TCGA-CN-6994	HNSC	WHITE
TCGA-D8-A1XT	BRCA	WHITE
TCGA-AC-A8OQ	BRCA	BLACK OR AFRICAN AMERICAN
TCGA-HN-A2OB	BRCA	NA/UK
TCGA-CC-A7IH	LIHC	NA/UK
TCGA-QT-A5XP	PCPG	BLACK OR AFRICAN AMERICAN
TCGA-T2-A6WX	HNSC	WHITE
TCGA-D3-A1QA	SKCM	WHITE
TCGA-14-4157	GBM	BLACK OR AFRICAN AMERICAN
TCGA-KP-A3W3	UCEC	WHITE
TCGA-BP-4989	KIRC	WHITE
TCGA-17-Z015	LUAD	NA/UK
TCGA-A2-A0CV	BRCA	ASIAN
TCGA-G4-6320	COADREAD	WHITE
TCGA-CK-6746	COADREAD	WHITE
TCGA-RW-A680	PCPG	WHITE
TCGA-B6-A0X5	BRCA	BLACK OR AFRICAN AMERICAN
TCGA-49-6742	LUAD	WHITE
TCGA-QH-A6X4	LGG	WHITE
TCGA-A8-A0A1	BRCA	NA/UK
TCGA-EI-6507	COADREAD	WHITE
TCGA-CA-5254	COADREAD	ASIAN
TCGA-59-2355	OV	WHITE
TCGA-ET-A4KQ	THCA	WHITE
TCGA-TM-A84B	LGG	WHITE
TCGA-IA-A40X	KIRP	BLACK OR AFRICAN AMERICAN
TCGA-16-0849	GBM	WHITE
TCGA-BJ-A0ZF	THCA	WHITE
TCGA-36-2548	OV	NA/UK
TCGA-68-8251	LUSC	WHITE
TCGA-ER-A198	SKCM	WHITE
TCGA-73-7498	LUAD	WHITE
TCGA-A7-A2KD	BRCA	BLACK OR AFRICAN AMERICAN
TCGA-BH-A0DX	BRCA	WHITE
TCGA-66-2763	LUSC	NA/UK
TCGA-QD-A8IV	THCA	BLACK OR AFRICAN AMERICAN
TCGA-A8-A09N	BRCA	NA/UK
TCGA-4Z-AA7Q	BLCA	WHITE
TCGA-EY-A1GU	UCEC	BLACK OR AFRICAN AMERICAN
TCGA-BH-A0BT	BRCA	WHITE
TCGA-KS-A41J	THCA	WHITE
TCGA-AA-3866	COADREAD	NA/UK
TCGA-CC-5262	LIHC	ASIAN
TCGA-CR-7402	HNSC	WHITE
TCGA-DD-A3A0	LIHC	WHITE
TCGA-FW-A3R5	SKCM	WHITE
TCGA-LL-A740	BRCA	BLACK OR AFRICAN AMERICAN
TCGA-IE-A4EJ	SARC	WHITE
TCGA-DX-A3M1	SARC	WHITE
TCGA-IN-A7NT	STAD	WHITE
TCGA-BT-A20P	BLCA	WHITE
TCGA-AX-A06F	UCEC	WHITE
TCGA-EE-A20I	SKCM	WHITE
TCGA-B0-5116	KIRC	WHITE
TCGA-Y8-A895	KIRP	WHITE
TCGA-MN-A4N1	LUAD	BLACK OR AFRICAN AMERICAN
TCGA-CK-5912	COADREAD	WHITE
TCGA-A5-A0RA	UCEC	WHITE
TCGA-EL-A3TA	THCA	WHITE
TCGA-HU-A4G9	STAD	ASIAN
TCGA-4Z-AA82	BLCA	BLACK OR AFRICAN AMERICAN
TCGA-D5-7000	COADREAD	WHITE
TCGA-FD-A5BY	BLCA	WHITE
TCGA-D7-6522	STAD	WHITE
TCGA-J9-A8CN	PRAD	NA/UK
TCGA-24-1436	OV	WHITE
TCGA-EE-A29V	SKCM	WHITE
TCGA-E5-A4TZ	BLCA	WHITE
TCGA-EB-A6QZ	SKCM	WHITE
TCGA-A3-A8OX	KIRC	BLACK OR AFRICAN AMERICAN
TCGA-DJ-A4V5	THCA	WHITE
TCGA-06-0745	GBM	WHITE
TCGA-AL-3466	KIRP	WHITE
TCGA-55-7910	LUAD	BLACK OR AFRICAN AMERICAN
TCGA-GV-A3JZ	BLCA	WHITE
TCGA-H6-8124	PAAD	WHITE
TCGA-78-7148	LUAD	WHITE
TCGA-2G-AAF4	TGCT	WHITE
TCGA-16-0848	GBM	WHITE
TCGA-SH-A7BC	MESO	WHITE
TCGA-C5-A2LT	CESC	WHITE
TCGA-NH-A6GB	COADREAD	BLACK OR AFRICAN AMERICAN
TCGA-X6-A8C7	SARC	WHITE
TCGA-DU-A5TW	LGG	BLACK OR AFRICAN AMERICAN
TCGA-18-3421	LUSC	WHITE
TCGA-A5-A0GD	UCEC	WHITE
TCGA-C4-A0F1	BLCA	NA/UK
TCGA-MH-A857	KIRP	BLACK OR AFRICAN AMERICAN
TCGA-CJ-5676	KIRC	WHITE
TCGA-Q1-A5R2	CESC	WHITE
TCGA-DS-A3LQ	CESC	NA/UK
TCGA-LG-A6GG	LIHC	NA/UK
TCGA-HT-7607	LGG	WHITE
TCGA-61-1901	OV	WHITE
TCGA-56-7823	LUSC	NA/UK
TCGA-DD-AADM	LIHC	NA/UK
TCGA-3B-A9HJ	SARC	WHITE
TCGA-LL-A6FP	BRCA	WHITE
TCGA-CG-4460	STAD	NA/UK
TCGA-BC-4073	LIHC	WHITE
TCGA-H7-A76A	HNSC	WHITE
TCGA-BH-A0HU	BRCA	WHITE
TCGA-CF-A9FM	BLCA	NA/UK
TCGA-TM-A84R	LGG	WHITE
TCGA-E9-A22H	BRCA	WHITE
TCGA-EM-A3FR	THCA	NA/UK
TCGA-AN-A04C	BRCA	WHITE
TCGA-ZG-A9M4	PRAD	NA/UK
TCGA-33-AASJ	LUSC	BLACK OR AFRICAN AMERICAN
TCGA-A2-A3XV	BRCA	BLACK OR AFRICAN AMERICAN
TCGA-BH-A0B7	BRCA	WHITE
TCGA-B5-A0K2	UCEC	WHITE
TCGA-FT-A61P	BLCA	WHITE
TCGA-AF-6136	COADREAD	WHITE
TCGA-HQ-A2OE	BLCA	NA/UK
TCGA-FL-A1YM	UCEC	NA/UK
TCGA-DJ-A2PT	THCA	WHITE
TCGA-3A-A9IJ	PAAD	WHITE
TCGA-B0-5095	KIRC	WHITE
TCGA-2H-A9GI	ESCA	NA/UK
TCGA-ZJ-AAX8	CESC	NA/UK
TCGA-OR-A5LN	ACC	NA/UK
TCGA-CV-5442	HNSC	WHITE
TCGA-VS-A9V5	CESC	WHITE
TCGA-37-3789	LUSC	WHITE
TCGA-55-7576	LUAD	BLACK OR AFRICAN AMERICAN
TCGA-P4-A5E6	KIRP	BLACK OR AFRICAN AMERICAN
TCGA-KQ-A41O	BLCA	NA/UK
TCGA-ZJ-A8QQ	CESC	NA/UK
TCGA-EE-A2MT	SKCM	WHITE
TCGA-QQ-A5VC	SARC	WHITE
TCGA-V4-A9E9	UVM	WHITE
TCGA-33-AAS8	LUSC	BLACK OR AFRICAN AMERICAN
TCGA-DS-A1OC	CESC	WHITE
TCGA-FG-A713	LGG	WHITE
TCGA-43-3394	LUSC	BLACK OR AFRICAN AMERICAN
TCGA-EM-A3FK	THCA	NA/UK
TCGA-06-5413	GBM	WHITE
TCGA-EM-A2CM	THCA	NA/UK
TCGA-F2-A44H	PAAD	WHITE
TCGA-R6-A6XG	ESCA	WHITE
TCGA-CX-7085	HNSC	WHITE
TCGA-BH-A0WA	BRCA	WHITE
TCGA-61-2109	OV	WHITE
TCGA-A2-A0ST	BRCA	WHITE
TCGA-BH-A1FC	BRCA	BLACK OR AFRICAN AMERICAN
TCGA-BH-A1FR	BRCA	WHITE
TCGA-A1-A0SO	BRCA	WHITE
TCGA-18-3419	LUSC	NA/UK
TCGA-61-1733	OV	WHITE
TCGA-2G-AAGI	TGCT	WHITE
TCGA-CF-A5UA	BLCA	ASIAN
TCGA-BR-7723	STAD	WHITE
TCGA-LK-A4O7	MESO	WHITE
TCGA-IM-A3EB	THCA	WHITE
TCGA-AB-2839	LAML	WHITE
TCGA-NJ-A4YP	LUAD	WHITE
TCGA-FC-A4JI	PRAD	NA/UK
TCGA-85-8350	LUSC	WHITE
TCGA-KK-A6E1	PRAD	NA/UK
TCGA-AB-2829	LAML	BLACK OR AFRICAN AMERICAN
TCGA-BR-A44T	STAD	WHITE
TCGA-HW-8321	LGG	WHITE
TCGA-E8-A418	THCA	WHITE
TCGA-C4-A0F0	BLCA	NA/UK
TCGA-AC-A2FF	BRCA	ASIAN
TCGA-50-6590	LUAD	WHITE
TCGA-E2-A1AZ	BRCA	WHITE
TCGA-D1-A160	UCEC	WHITE
TCGA-IW-A3M6	SARC	ASIAN
TCGA-CV-7091	HNSC	WHITE
TCGA-L5-A88W	ESCA	WHITE
TCGA-FW-A5DY	SKCM	WHITE
TCGA-D3-A8GD	SKCM	WHITE
TCGA-CC-A7IL	LIHC	NA/UK
TCGA-EP-A12J	LIHC	BLACK OR AFRICAN AMERICAN
TCGA-GC-A3BM	BLCA	WHITE
TCGA-QC-A7B5	SARC	WHITE
TCGA-VQ-AA64	STAD	NA/UK
TCGA-LN-A7HZ	ESCA	ASIAN
TCGA-G9-6377	PRAD	WHITE
TCGA-KK-A8II	PRAD	NA/UK
TCGA-L1-A7W4	PAAD	WHITE
TCGA-D3-A8GM	SKCM	WHITE
TCGA-BR-4257	STAD	WHITE
TCGA-C5-A7UE	CESC	WHITE
TCGA-06-0188	GBM	WHITE
TCGA-HC-7078	PRAD	WHITE
TCGA-CV-7248	HNSC	BLACK OR AFRICAN AMERICAN
TCGA-BG-A0RY	UCEC	WHITE
TCGA-B0-5117	KIRC	WHITE
TCGA-SX-A71R	KIRP	WHITE
TCGA-B8-5546	KIRC	BLACK OR AFRICAN AMERICAN
TCGA-LP-A4AU	CESC	ASIAN
TCGA-A8-A09E	BRCA	NA/UK
TCGA-DX-A8BZ	SARC	BLACK OR AFRICAN AMERICAN
TCGA-OR-A5JX	ACC	WHITE
TCGA-G2-A2EJ	BLCA	WHITE
TCGA-AG-3742	COADREAD	NA/UK
TCGA-V4-A9EE	UVM	NA/UK
TCGA-3B-A9HQ	SARC	WHITE
TCGA-BF-A1PV	SKCM	WHITE
TCGA-V5-A7RC	ESCA	BLACK OR AFRICAN AMERICAN
TCGA-EL-A3CS	THCA	WHITE
TCGA-24-0980	OV	WHITE
TCGA-W4-A7U2	TGCT	WHITE
TCGA-FF-8046	DLBL	ASIAN
TCGA-IN-7806	STAD	WHITE
TCGA-CV-5977	HNSC	WHITE
TCGA-AA-3980	COADREAD	NA/UK
TCGA-EJ-A6RA	PRAD	NA/UK
TCGA-DD-A39V	LIHC	WHITE
TCGA-Y8-A8RY	KIRP	WHITE
TCGA-EL-A3CO	THCA	WHITE
TCGA-20-1685	OV	WHITE
TCGA-DD-AADK	LIHC	NA/UK
TCGA-J4-A83N	PRAD	NA/UK
TCGA-19-1387	GBM	WHITE
TCGA-18-3408	LUSC	WHITE
TCGA-CW-6088	KIRC	WHITE
TCGA-CQ-7067	HNSC	WHITE
TCGA-EK-A2RJ	CESC	WHITE
TCGA-DJ-A2PW	THCA	WHITE
TCGA-56-8307	LUSC	NA/UK
TCGA-DJ-A13R	THCA	WHITE
TCGA-EE-A2GR	SKCM	WHITE
TCGA-ZF-AA4T	BLCA	WHITE
TCGA-EO-A3B1	UCEC	NA/UK
TCGA-E2-A15A	BRCA	WHITE
TCGA-LL-A441	BRCA	BLACK OR AFRICAN AMERICAN
TCGA-DD-AAVS	LIHC	NA/UK
TCGA-FL-A1YU	UCEC	NA/UK
TCGA-ET-A40Q	THCA	WHITE
TCGA-EJ-A7NK	PRAD	NA/UK
TCGA-AB-2893	LAML	WHITE
TCGA-WB-A81G	PCPG	WHITE
TCGA-AJ-A3NE	UCEC	WHITE
TCGA-EA-A3QD	CESC	WHITE
TCGA-D9-A3Z1	SKCM	WHITE
TCGA-CX-7086	HNSC	BLACK OR AFRICAN AMERICAN
TCGA-HZ-A77P	PAAD	WHITE
TCGA-D3-A1Q4	SKCM	WHITE
TCGA-E2-A2P5	BRCA	BLACK OR AFRICAN AMERICAN
TCGA-DA-A3F8	SKCM	WHITE
TCGA-34-8454	LUSC	WHITE
TCGA-BH-A0BP	BRCA	WHITE
TCGA-90-7769	LUSC	WHITE
TCGA-DD-AAW2	LIHC	NA/UK
TCGA-DQ-7595	HNSC	WHITE
TCGA-A2-A0YF	BRCA	BLACK OR AFRICAN AMERICAN
TCGA-DJ-A3V5	THCA	WHITE
TCGA-AP-A0LG	UCEC	WHITE
TCGA-XF-AAMG	BLCA	NA/UK
TCGA-86-7701	LUAD	WHITE
TCGA-SY-A9G0	BLCA	WHITE
TCGA-DY-A1DD	COADREAD	WHITE
TCGA-55-6980	LUAD	WHITE
TCGA-BP-4974	KIRC	WHITE
TCGA-C8-A12N	BRCA	ASIAN
TCGA-G2-A2EF	BLCA	WHITE
TCGA-C5-A2LV	CESC	BLACK OR AFRICAN AMERICAN
TCGA-HT-7677	LGG	WHITE
TCGA-BR-7716	STAD	WHITE
TCGA-VD-A8K9	UVM	NA/UK
TCGA-B0-5709	KIRC	WHITE
TCGA-DU-6399	LGG	WHITE
TCGA-95-7948	LUAD	WHITE
TCGA-HC-8258	PRAD	NA/UK
TCGA-A2-A0D1	BRCA	WHITE
TCGA-BR-7957	STAD	WHITE
TCGA-KS-A41F	THCA	WHITE
TCGA-06-A6S0	GBM	BLACK OR AFRICAN AMERICAN
TCGA-KO-8410	KICH	WHITE
TCGA-XE-AAOC	TGCT	WHITE
TCGA-DD-AAE9	LIHC	NA/UK
TCGA-DD-AACQ	LIHC	NA/UK
TCGA-06-1802	GBM	WHITE
TCGA-50-6597	LUAD	WHITE
TCGA-DQ-7590	HNSC	WHITE
TCGA-HU-A4HB	STAD	ASIAN
TCGA-EL-A3ZT	THCA	WHITE
TCGA-E2-A15R	BRCA	WHITE
TCGA-E9-A227	BRCA	WHITE
TCGA-HD-7753	HNSC	BLACK OR AFRICAN AMERICAN
TCGA-EJ-7789	PRAD	BLACK OR AFRICAN AMERICAN
TCGA-24-2262	OV	WHITE
TCGA-3U-A98E	MESO	NA/UK
TCGA-EE-A29X	SKCM	WHITE
TCGA-IG-A5S3	ESCA	WHITE
TCGA-A4-8630	KIRP	WHITE
TCGA-63-A5MJ	LUSC	NA/UK
TCGA-FG-5962	LGG	WHITE
TCGA-D8-A1XG	BRCA	WHITE
TCGA-CZ-5458	KIRC	WHITE
TCGA-DJ-A3V9	THCA	WHITE
TCGA-UZ-A9PP	KIRP	NA/UK
TCGA-B6-A3ZX	BRCA	NA/UK
TCGA-BP-4962	KIRC	WHITE
TCGA-A6-2681	COADREAD	WHITE
TCGA-NJ-A4YI	LUAD	WHITE
TCGA-05-4417	LUAD	NA/UK
TCGA-28-1760	GBM	WHITE
TCGA-G4-6310	COADREAD	WHITE
TCGA-BP-4161	KIRC	WHITE
TCGA-HT-7608	LGG	BLACK OR AFRICAN AMERICAN
TCGA-04-1369	OV	WHITE
TCGA-E2-A1LB	BRCA	BLACK OR AFRICAN AMERICAN
TCGA-75-6214	LUAD	NA/UK
TCGA-85-8481	LUSC	WHITE
TCGA-AK-3455	KIRC	WHITE
TCGA-AN-A0XW	BRCA	WHITE
TCGA-DK-A6B2	BLCA	WHITE
TCGA-DK-AA71	BLCA	NA/UK
TCGA-CV-7101	HNSC	WHITE
TCGA-86-A4P8	LUAD	WHITE
TCGA-QR-A6H5	PCPG	BLACK OR AFRICAN AMERICAN
TCGA-A4-7288	KIRP	WHITE
TCGA-EE-A17Z	SKCM	WHITE
TCGA-AF-2690	COADREAD	WHITE
TCGA-VQ-A8E7	STAD	NA/UK
TCGA-E9-A5UO	BRCA	WHITE
TCGA-DI-A2QY	UCEC	WHITE
TCGA-C5-A1BN	CESC	WHITE
TCGA-98-A539	LUSC	WHITE
TCGA-14-0740	GBM	WHITE
TCGA-DU-7290	LGG	WHITE
TCGA-XF-AAMR	BLCA	WHITE
TCGA-44-6779	LUAD	WHITE
TCGA-91-6828	LUAD	WHITE
TCGA-BR-A4QI	STAD	WHITE
TCGA-ER-A19E	SKCM	WHITE
TCGA-X9-A973	SARC	WHITE
TCGA-DX-A8BR	SARC	WHITE
TCGA-EJ-5512	PRAD	WHITE
TCGA-EX-A3L1	CESC	WHITE
TCGA-D1-A0ZV	UCEC	WHITE
TCGA-DD-AADJ	LIHC	NA/UK
TCGA-66-2756	LUSC	NA/UK
TCGA-J8-A3YG	THCA	WHITE
TCGA-CJ-4912	KIRC	WHITE
TCGA-WB-A80O	PCPG	WHITE
TCGA-05-4433	LUAD	NA/UK
TCGA-GV-A6ZA	BLCA	WHITE
TCGA-G7-6796	KIRP	WHITE
TCGA-C8-A8HP	BRCA	NA/UK
TCGA-EP-A2KB	LIHC	WHITE
TCGA-FG-8181	LGG	WHITE
TCGA-DX-A2IZ	SARC	NA/UK
TCGA-DK-AA6M	BLCA	NA/UK
TCGA-AG-3732	COADREAD	NA/UK
TCGA-09-2050	OV	WHITE
TCGA-ND-A4WA	UCS	ASIAN
TCGA-4A-A93Y	KIRP	NA/UK
TCGA-EE-A2MP	SKCM	WHITE
TCGA-E2-A14N	BRCA	WHITE
TCGA-41-3392	GBM	WHITE
TCGA-HU-A4GP	STAD	ASIAN
TCGA-RD-A8NB	STAD	WHITE
TCGA-66-2793	LUSC	NA/UK
TCGA-HZ-A49I	PAAD	WHITE
TCGA-BH-A0B3	BRCA	WHITE
TCGA-CH-5746	PRAD	WHITE
TCGA-14-1456	GBM	WHITE
TCGA-B6-A0IK	BRCA	WHITE
TCGA-DU-A7TB	LGG	ASIAN
TCGA-C8-A274	BRCA	ASIAN
TCGA-XF-AAN3	BLCA	WHITE
TCGA-42-2591	OV	WHITE
TCGA-G9-6384	PRAD	WHITE
TCGA-AO-A1KR	BRCA	WHITE
TCGA-E2-A14O	BRCA	WHITE
TCGA-CD-A4MG	STAD	ASIAN
TCGA-DW-7963	KIRP	BLACK OR AFRICAN AMERICAN
TCGA-ZR-A9CJ	ESCA	WHITE
TCGA-AN-A0XV	BRCA	WHITE
TCGA-D7-6820	STAD	WHITE
TCGA-FD-A43X	BLCA	WHITE
TCGA-L5-A4OG	ESCA	WHITE
TCGA-26-5135	GBM	WHITE
TCGA-PJ-A5Z8	KIRP	WHITE
TCGA-ZG-A9N3	PRAD	NA/UK
TCGA-IG-A6QS	ESCA	WHITE
TCGA-S9-A7R7	LGG	WHITE
TCGA-XE-AAOF	TGCT	ASIAN
TCGA-HT-7855	LGG	WHITE
TCGA-EE-A3JD	SKCM	WHITE
TCGA-KK-A8I4	PRAD	NA/UK
TCGA-60-2711	LUSC	WHITE
TCGA-VQ-AA6F	STAD	NA/UK
TCGA-VD-A8KM	UVM	NA/UK
TCGA-AA-A024	COADREAD	NA/UK
TCGA-B0-5701	KIRC	WHITE
TCGA-34-5927	LUSC	WHITE
TCGA-PC-A5DO	SARC	WHITE
TCGA-DJ-A1QQ	THCA	ASIAN
TCGA-D8-A1XW	BRCA	WHITE
TCGA-CJ-6031	KIRC	WHITE
TCGA-BS-A0WQ	UCEC	ASIAN
TCGA-HV-A5A4	PAAD	NA/UK
TCGA-JY-A6FD	ESCA	ASIAN
TCGA-GR-A4D9	DLBL	WHITE
TCGA-EL-A4KI	THCA	WHITE
TCGA-CZ-5987	KIRC	WHITE
TCGA-GM-A5PX	BRCA	WHITE
TCGA-P5-A72X	LGG	WHITE
TCGA-SR-A6N0	PCPG	WHITE
TCGA-DK-A3IV	BLCA	WHITE
TCGA-DD-AACP	LIHC	NA/UK
TCGA-A3-3363	KIRC	ASIAN
TCGA-14-0866	GBM	WHITE
TCGA-WB-A81N	PCPG	WHITE
TCGA-QH-A65R	LGG	WHITE
TCGA-AO-A0JD	BRCA	WHITE
TCGA-HD-7831	HNSC	WHITE
TCGA-XF-A9T8	BLCA	WHITE
TCGA-14-0789	GBM	WHITE
TCGA-10-0935	OV	WHITE
TCGA-ED-A82E	LIHC	NA/UK
TCGA-56-A4BW	LUSC	WHITE
TCGA-77-7139	LUSC	WHITE
TCGA-DD-AACL	LIHC	NA/UK
TCGA-CW-6087	KIRC	WHITE
TCGA-56-7731	LUSC	WHITE
TCGA-DB-A75L	LGG	WHITE
TCGA-CN-A63T	HNSC	WHITE
TCGA-FP-7735	STAD	BLACK OR AFRICAN AMERICAN
TCGA-OR-A5LR	ACC	NA/UK
TCGA-AP-A0LF	UCEC	WHITE
TCGA-A7-A0CE	BRCA	WHITE
TCGA-G9-A9S7	PRAD	NA/UK
TCGA-UB-A7MC	LIHC	NA/UK
TCGA-55-1595	LUAD	ASIAN
TCGA-BH-A18S	BRCA	WHITE
TCGA-2F-A9KO	BLCA	WHITE
TCGA-WK-A8XY	SARC	WHITE
TCGA-KK-A7B4	PRAD	NA/UK
TCGA-BH-A28O	BRCA	WHITE
TCGA-HC-7232	PRAD	WHITE
TCGA-EP-A3RK	LIHC	WHITE
TCGA-A2-A0CL	BRCA	BLACK OR AFRICAN AMERICAN
TCGA-DU-8168	LGG	WHITE
TCGA-DQ-7596	HNSC	WHITE
TCGA-CZ-5453	KIRC	WHITE
TCGA-VR-A8ER	ESCA	NA/UK
TCGA-DU-A7T6	LGG	WHITE
TCGA-49-4486	LUAD	WHITE
TCGA-A6-A565	COADREAD	BLACK OR AFRICAN AMERICAN
TCGA-BD-A3EP	LIHC	BLACK OR AFRICAN AMERICAN
TCGA-DV-5574	KIRC	WHITE
TCGA-13-1410	OV	WHITE
TCGA-Q3-A5QY	PAAD	WHITE
TCGA-G9-6361	PRAD	WHITE
TCGA-CN-A6V1	HNSC	WHITE
TCGA-97-A4M6	LUAD	NA/UK
TCGA-A5-A7WJ	UCEC	NA/UK
TCGA-TN-A7HJ	HNSC	WHITE
TCGA-EZ-7264	LGG	WHITE
TCGA-12-1092	GBM	WHITE
TCGA-D1-A15Z	UCEC	WHITE
TCGA-BP-4972	KIRC	WHITE
TCGA-56-A4ZJ	LUSC	WHITE
TCGA-G3-A3CG	LIHC	WHITE
TCGA-VR-A8Q7	ESCA	WHITE
TCGA-23-2647	OV	ASIAN
TCGA-P7-A5NY	PCPG	WHITE
TCGA-HT-7475	LGG	WHITE
TCGA-B0-5399	KIRC	WHITE
TCGA-HT-7686	LGG	WHITE
TCGA-F7-A61W	HNSC	ASIAN
TCGA-IM-A420	THCA	WHITE
TCGA-B0-5698	KIRC	BLACK OR AFRICAN AMERICAN
TCGA-KQ-A41N	BLCA	NA/UK
TCGA-VF-A8AD	TGCT	NA/UK
TCGA-FS-A4FD	SKCM	WHITE
TCGA-RM-A68T	PCPG	BLACK OR AFRICAN AMERICAN
TCGA-A8-A09D	BRCA	NA/UK
TCGA-24-2293	OV	WHITE
TCGA-J8-A3O1	THCA	WHITE
TCGA-EI-6511	COADREAD	WHITE
TCGA-2A-A8W3	PRAD	NA/UK
TCGA-B6-A0IB	BRCA	WHITE
TCGA-61-1895	OV	WHITE
TCGA-BH-A0BF	BRCA	WHITE
TCGA-D8-A3Z5	BRCA	WHITE
TCGA-VD-A8KO	UVM	NA/UK
TCGA-22-0940	LUSC	WHITE
TCGA-V1-A9OH	PRAD	NA/UK
TCGA-FV-A3R2	LIHC	WHITE
TCGA-AB-2846	LAML	WHITE
TCGA-B7-A5TI	STAD	NA/UK
TCGA-B1-A656	KIRP	WHITE
TCGA-WS-AB45	COADREAD	BLACK OR AFRICAN AMERICAN
TCGA-EB-A3Y6	SKCM	WHITE
TCGA-EB-A5VV	SKCM	WHITE
TCGA-D1-A0ZP	UCEC	WHITE
TCGA-05-4418	LUAD	NA/UK
TCGA-AB-2869	LAML	BLACK OR AFRICAN AMERICAN
TCGA-IG-A3YB	ESCA	WHITE
TCGA-44-6144	LUAD	WHITE
TCGA-XE-AAO6	TGCT	WHITE
TCGA-C5-A1BM	CESC	BLACK OR AFRICAN AMERICAN
TCGA-3N-A9WB	SKCM	WHITE
TCGA-2J-AABP	PAAD	WHITE
TCGA-KS-A4I5	THCA	WHITE
TCGA-D7-A4YU	STAD	WHITE
TCGA-SC-A6LM	MESO	WHITE
TCGA-HU-A4GF	STAD	ASIAN
TCGA-EJ-5508	PRAD	WHITE
TCGA-ND-A4WF	UCS	WHITE
TCGA-DU-7014	LGG	WHITE
TCGA-4Z-AA7O	BLCA	BLACK OR AFRICAN AMERICAN
TCGA-A2-A25A	BRCA	WHITE
TCGA-DX-A7EM	SARC	WHITE
TCGA-AX-A2H7	UCEC	WHITE
TCGA-DU-5874	LGG	WHITE
TCGA-QR-A70N	PCPG	BLACK OR AFRICAN AMERICAN
TCGA-24-2019	OV	WHITE
TCGA-A8-A0A4	BRCA	NA/UK
TCGA-CR-7379	HNSC	WHITE
TCGA-BT-A20O	BLCA	WHITE
TCGA-CG-5723	STAD	NA/UK
TCGA-2Y-A9HB	LIHC	NA/UK
TCGA-QH-A6X8	LGG	WHITE
TCGA-IF-A4AK	SARC	WHITE
TCGA-EM-A2OX	THCA	NA/UK
TCGA-A2-A3XS	BRCA	BLACK OR AFRICAN AMERICAN
TCGA-QR-A70P	PCPG	WHITE
TCGA-UC-A7PI	CESC	WHITE
TCGA-DX-A6BE	SARC	WHITE
TCGA-EJ-A8FP	PRAD	NA/UK
TCGA-D9-A1JX	SKCM	WHITE
TCGA-3U-A98I	MESO	NA/UK
TCGA-WP-A9GB	SARC	WHITE
TCGA-66-2783	LUSC	NA/UK
TCGA-13-1494	OV	WHITE
TCGA-YL-A8HL	PRAD	NA/UK
TCGA-FS-A1ZA	SKCM	WHITE
TCGA-D5-6531	COADREAD	WHITE
TCGA-A2-A25E	BRCA	BLACK OR AFRICAN AMERICAN
TCGA-DA-A3F3	SKCM	WHITE
TCGA-BH-A1F6	BRCA	WHITE
TCGA-A7-A4SF	BRCA	BLACK OR AFRICAN AMERICAN
TCGA-F9-A7VF	KIRP	WHITE
TCGA-A7-A3J0	BRCA	WHITE
TCGA-ER-A19T	SKCM	WHITE
TCGA-F7-A622	HNSC	WHITE
TCGA-06-0169	GBM	WHITE
TCGA-DX-A1L4	SARC	NA/UK
TCGA-OR-A5L5	ACC	WHITE
TCGA-A1-A0SD	BRCA	WHITE
TCGA-50-6673	LUAD	WHITE
TCGA-HT-7483	LGG	WHITE
TCGA-A8-A06Q	BRCA	NA/UK
TCGA-AC-A23C	BRCA	WHITE
TCGA-IQ-A61H	HNSC	WHITE
TCGA-GV-A3JX	BLCA	WHITE
TCGA-YG-AA3P	SKCM	NA/UK
TCGA-VV-A829	LGG	WHITE
TCGA-E9-A228	BRCA	WHITE
TCGA-FA-8693	DLBL	WHITE
TCGA-A6-2686	COADREAD	WHITE
TCGA-BR-A4PD	STAD	WHITE
TCGA-CD-8525	STAD	ASIAN
TCGA-QQ-A5V9	SARC	WHITE
TCGA-L5-A8NV	ESCA	WHITE
TCGA-C5-A7CH	CESC	WHITE
TCGA-WC-AA9A	UVM	WHITE
TCGA-MX-A663	STAD	WHITE
TCGA-B8-A54I	KIRC	BLACK OR AFRICAN AMERICAN
TCGA-3A-A9IC	PAAD	WHITE
TCGA-DD-A4ND	LIHC	WHITE
TCGA-D1-A3DG	UCEC	WHITE
TCGA-37-3783	LUSC	WHITE
TCGA-HS-A5N9	SARC	NA/UK
TCGA-WN-A9G9	KIRP	WHITE
TCGA-5P-A9K2	KIRP	NA/UK
TCGA-D7-8579	STAD	WHITE
TCGA-QR-A70K	PCPG	WHITE
TCGA-CD-8528	STAD	ASIAN
TCGA-DJ-A3VK	THCA	NA/UK
TCGA-61-1919	OV	WHITE
TCGA-CN-A640	HNSC	WHITE
TCGA-EE-A20B	SKCM	WHITE
TCGA-OL-A5D6	BRCA	BLACK OR AFRICAN AMERICAN
TCGA-EJ-5511	PRAD	BLACK OR AFRICAN AMERICAN
TCGA-27-1836	GBM	WHITE
TCGA-QR-A70Q	PCPG	WHITE
TCGA-D8-A1XS	BRCA	WHITE
TCGA-99-8032	LUAD	WHITE
TCGA-3B-A9I3	SARC	WHITE
TCGA-MH-A562	KIRP	BLACK OR AFRICAN AMERICAN
TCGA-A4-A5DU	KIRP	WHITE
TCGA-GL-6846	KIRP	WHITE
TCGA-A3-3316	KIRC	WHITE
TCGA-J2-8192	LUAD	WHITE
TCGA-R5-A804	STAD	NA/UK
TCGA-L5-A8NW	ESCA	WHITE
TCGA-D3-A51K	SKCM	WHITE
TCGA-2Y-A9GS	LIHC	NA/UK
TCGA-FJ-A3ZF	BLCA	WHITE
TCGA-D8-A1XF	BRCA	WHITE
TCGA-BQ-5877	KIRP	BLACK OR AFRICAN AMERICAN
TCGA-55-6712	LUAD	WHITE
TCGA-76-4931	GBM	WHITE
TCGA-VD-A8KB	UVM	NA/UK
TCGA-CN-5374	HNSC	WHITE
TCGA-Q1-A73R	CESC	WHITE
TCGA-05-5715	LUAD	NA/UK
TCGA-BR-8363	STAD	WHITE
TCGA-TM-A7C4	LGG	WHITE
TCGA-XV-A9VZ	SKCM	NA/UK
TCGA-B8-4143	KIRC	WHITE
TCGA-33-4533	LUSC	BLACK OR AFRICAN AMERICAN
TCGA-V1-A9ZG	PRAD	NA/UK
TCGA-CJ-4882	KIRC	BLACK OR AFRICAN AMERICAN
TCGA-AX-A06H	UCEC	AMERICAN INDIAN OR ALASKA NATIVE
TCGA-EY-A1GK	UCEC	WHITE
TCGA-06-0145	GBM	WHITE
TCGA-AJ-A3NG	UCEC	WHITE
TCGA-63-A5MH	LUSC	NA/UK
TCGA-EB-A3XC	SKCM	WHITE
TCGA-B1-A654	KIRP	BLACK OR AFRICAN AMERICAN
TCGA-VQ-AA6J	STAD	BLACK OR AFRICAN AMERICAN
TCGA-IR-A3LF	CESC	WHITE
TCGA-13-1512	OV	WHITE
TCGA-DC-6155	COADREAD	WHITE
TCGA-06-0649	GBM	BLACK OR AFRICAN AMERICAN
TCGA-09-0369	OV	WHITE
TCGA-29-1701	OV	WHITE
TCGA-B6-A0RE	BRCA	BLACK OR AFRICAN AMERICAN
TCGA-XF-A8HH	BLCA	WHITE
TCGA-AF-3913	COADREAD	BLACK OR AFRICAN AMERICAN
TCGA-DJ-A3V3	THCA	ASIAN
TCGA-2F-A9KT	BLCA	WHITE
TCGA-XP-A8T7	ESCA	NA/UK
TCGA-60-2719	LUSC	WHITE
TCGA-AA-3968	COADREAD	NA/UK
TCGA-A2-A04T	BRCA	WHITE
TCGA-GS-A9TX	DLBL	WHITE
TCGA-E2-A1IG	BRCA	WHITE
TCGA-VF-A8AB	TGCT	NA/UK
TCGA-A2-A25B	BRCA	BLACK OR AFRICAN AMERICAN
TCGA-XV-AAZV	SKCM	NA/UK
TCGA-09-2049	OV	WHITE
TCGA-EM-A4FF	THCA	NA/UK
TCGA-L6-A4EP	THCA	ASIAN
TCGA-WE-A8ZY	SKCM	WHITE
TCGA-CC-A7IK	LIHC	NA/UK
TCGA-F4-6854	COADREAD	WHITE
TCGA-13-0899	OV	WHITE
TCGA-MW-A4EC	KIRC	BLACK OR AFRICAN AMERICAN
TCGA-EE-A29W	SKCM	WHITE
TCGA-A8-A07R	BRCA	NA/UK
TCGA-RR-A6KA	GBM	BLACK OR AFRICAN AMERICAN
TCGA-DU-8163	LGG	WHITE
TCGA-KK-A7AZ	PRAD	NA/UK
TCGA-OR-A5JE	ACC	WHITE
TCGA-AB-2892	LAML	WHITE
TCGA-ET-A25O	THCA	BLACK OR AFRICAN AMERICAN
TCGA-DU-5870	LGG	WHITE
TCGA-EY-A1GX	UCEC	WHITE
TCGA-FS-A1ZP	SKCM	WHITE
TCGA-EE-A3JH	SKCM	WHITE
TCGA-V5-AASW	ESCA	WHITE
TCGA-4Z-AA7M	BLCA	WHITE
TCGA-2G-AAGY	TGCT	WHITE
TCGA-A2-A1FV	BRCA	WHITE
TCGA-06-6694	GBM	WHITE
TCGA-FB-AAPQ	PAAD	WHITE
TCGA-86-8281	LUAD	WHITE
TCGA-EL-A3GP	THCA	BLACK OR AFRICAN AMERICAN
TCGA-BR-A4IU	STAD	ASIAN
TCGA-VV-A86M	LGG	NA/UK
TCGA-GD-A2C5	BLCA	WHITE
TCGA-19-2621	GBM	WHITE
TCGA-KK-A6E4	PRAD	NA/UK
TCGA-OR-A5L4	ACC	WHITE
TCGA-DD-AAEK	LIHC	NA/UK
TCGA-D1-A2G6	UCEC	WHITE
TCGA-FR-A69P	SKCM	WHITE
TCGA-D6-A74Q	HNSC	WHITE
TCGA-CV-7261	HNSC	WHITE
TCGA-EL-A4JX	THCA	BLACK OR AFRICAN AMERICAN
TCGA-BH-A0DH	BRCA	WHITE
TCGA-E6-A2P9	UCEC	WHITE
TCGA-DX-A3UF	SARC	WHITE
TCGA-38-7271	LUAD	WHITE
TCGA-XV-A9W5	SKCM	NA/UK
TCGA-17-Z048	LUAD	NA/UK
TCGA-06-0140	GBM	WHITE
TCGA-R6-A6Y0	ESCA	WHITE
TCGA-D3-A51G	SKCM	WHITE
TCGA-WB-A80M	PCPG	WHITE
TCGA-28-2501	GBM	NA/UK
TCGA-BC-A10R	LIHC	WHITE
TCGA-BP-5007	KIRC	WHITE
TCGA-EB-A82B	SKCM	ASIAN
TCGA-CF-A47V	BLCA	ASIAN
TCGA-MR-A520	LIHC	NA/UK
TCGA-BA-6868	HNSC	BLACK OR AFRICAN AMERICAN
TCGA-12-0775	GBM	BLACK OR AFRICAN AMERICAN
TCGA-14-1795	GBM	WHITE
TCGA-DU-8166	LGG	WHITE
TCGA-BR-7197	STAD	WHITE
TCGA-06-6391	GBM	WHITE
TCGA-FS-A1Z3	SKCM	WHITE
TCGA-E9-A1NA	BRCA	WHITE
TCGA-DK-A1A7	BLCA	WHITE
TCGA-FU-A3NI	CESC	WHITE
TCGA-D1-A163	UCEC	WHITE
TCGA-61-1998	OV	WHITE
TCGA-AR-A1AV	BRCA	WHITE
TCGA-CV-A45X	HNSC	WHITE
TCGA-BH-A0DE	BRCA	WHITE
TCGA-DD-AAE2	LIHC	NA/UK
TCGA-CN-6018	HNSC	WHITE
TCGA-AF-6672	COADREAD	WHITE
TCGA-BR-7901	STAD	WHITE
TCGA-27-1834	GBM	WHITE
TCGA-67-3770	LUAD	WHITE
TCGA-VN-A943	PRAD	NA/UK
TCGA-HU-8608	STAD	ASIAN
TCGA-S9-A6WQ	LGG	WHITE
TCGA-AH-6547	COADREAD	WHITE
TCGA-AT-A5NU	KIRP	WHITE
TCGA-24-2254	OV	WHITE
TCGA-EE-A2GK	SKCM	WHITE
TCGA-Q1-A6DW	CESC	WHITE
TCGA-AB-2832	LAML	WHITE
TCGA-12-1597	GBM	WHITE
TCGA-S7-A7WX	PCPG	WHITE
TCGA-4K-AAAL	TGCT	WHITE
TCGA-D7-A6F2	STAD	WHITE
TCGA-KM-8477	KICH	WHITE
TCGA-BC-A69H	LIHC	NA/UK
TCGA-D8-A1JG	BRCA	WHITE
TCGA-37-A5EL	LUSC	NA/UK
TCGA-DB-A75O	LGG	WHITE
TCGA-D8-A147	BRCA	WHITE
TCGA-BB-7863	HNSC	WHITE
TCGA-4E-A92E	UCEC	NA/UK
TCGA-91-6830	LUAD	WHITE
TCGA-CH-5745	PRAD	WHITE
TCGA-13-0916	OV	WHITE
TCGA-A6-5662	COADREAD	WHITE
TCGA-L5-A8NJ	ESCA	WHITE
TCGA-21-5783	LUSC	WHITE
TCGA-A2-A04U	BRCA	WHITE
TCGA-BR-7717	STAD	WHITE
TCGA-V1-A8ML	PRAD	NA/UK
TCGA-FG-A4MW	LGG	WHITE
TCGA-D1-A3JP	UCEC	NA/UK
TCGA-DW-7838	KIRP	WHITE
TCGA-HE-A5NJ	KIRP	NA/UK
TCGA-85-8664	LUSC	WHITE
TCGA-CR-6472	HNSC	WHITE
TCGA-MQ-A4LV	MESO	WHITE
TCGA-06-0129	GBM	ASIAN
TCGA-AA-3715	COADREAD	NA/UK
TCGA-E2-A572	BRCA	BLACK OR AFRICAN AMERICAN
TCGA-77-A5G6	LUSC	NA/UK
TCGA-BH-A1FH	BRCA	WHITE
TCGA-29-1695	OV	WHITE
TCGA-D7-8578	STAD	WHITE
TCGA-QR-A705	PCPG	WHITE
TCGA-93-7348	LUAD	WHITE
TCGA-E2-A14Y	BRCA	WHITE
TCGA-GN-A262	SKCM	WHITE
TCGA-CQ-5331	HNSC	WHITE
TCGA-FS-A1ZR	SKCM	WHITE
TCGA-CG-5716	STAD	NA/UK
TCGA-A2-A0D0	BRCA	BLACK OR AFRICAN AMERICAN
TCGA-EJ-5505	PRAD	WHITE
TCGA-DX-A7EU	SARC	WHITE
TCGA-IB-7889	PAAD	WHITE
TCGA-CJ-5671	KIRC	WHITE
TCGA-VS-A9U7	CESC	WHITE
TCGA-EJ-5517	PRAD	WHITE
TCGA-DQ-7588	HNSC	WHITE
TCGA-CH-5764	PRAD	WHITE
TCGA-36-2534	OV	WHITE
TCGA-GH-A9DA	CESC	WHITE
TCGA-E1-A7YV	LGG	WHITE
TCGA-EE-A2MJ	SKCM	WHITE
TCGA-F4-6461	COADREAD	WHITE
TCGA-DJ-A2QC	THCA	NA/UK
TCGA-BJ-A2NA	THCA	WHITE
TCGA-AO-A1KO	BRCA	WHITE
TCGA-A6-2684	COADREAD	WHITE
TCGA-A8-A0A2	BRCA	NA/UK
TCGA-14-0812	GBM	WHITE
TCGA-BH-A18P	BRCA	WHITE
TCGA-97-A4M5	LUAD	NA/UK
TCGA-A3-A6NJ	KIRC	BLACK OR AFRICAN AMERICAN
TCGA-55-6981	LUAD	WHITE
TCGA-V4-A9EA	UVM	NA/UK
TCGA-EB-A4XL	SKCM	WHITE
TCGA-BR-6802	STAD	WHITE
TCGA-DJ-A2PU	THCA	WHITE
TCGA-D3-A2JC	SKCM	WHITE
TCGA-E2-A159	BRCA	WHITE
TCGA-C5-A7X3	CESC	WHITE
TCGA-KK-A8IK	PRAD	NA/UK
TCGA-29-1774	OV	WHITE
TCGA-B0-5812	KIRC	WHITE
TCGA-KS-A4I7	THCA	WHITE
TCGA-DX-A3U8	SARC	NA/UK
TCGA-EY-A1GL	UCEC	WHITE
TCGA-B2-4099	KIRC	WHITE
TCGA-2G-AAHA	TGCT	WHITE
TCGA-A4-8310	KIRP	WHITE
TCGA-IW-A3M4	SARC	WHITE
TCGA-SQ-A6I4	PCPG	WHITE
TCGA-17-Z042	LUAD	NA/UK
TCGA-LT-A8JT	BLCA	WHITE
TCGA-HC-7740	PRAD	WHITE
TCGA-HT-7605	LGG	WHITE
TCGA-CW-6090	KIRC	WHITE
TCGA-J4-A67T	PRAD	NA/UK
TCGA-RN-AAAQ	SARC	WHITE
TCGA-4Z-AA87	BLCA	BLACK OR AFRICAN AMERICAN
TCGA-2G-AAKD	TGCT	WHITE
TCGA-EM-A3SX	THCA	NA/UK
TCGA-CD-A4MJ	STAD	ASIAN
TCGA-93-7347	LUAD	WHITE
TCGA-LN-A5U7	ESCA	ASIAN
TCGA-B6-A0RO	BRCA	WHITE
TCGA-GF-A769	SKCM	WHITE
TCGA-12-3646	GBM	WHITE
TCGA-SN-A84W	TGCT	WHITE
TCGA-2Y-A9H4	LIHC	NA/UK
TCGA-2L-AAQI	PAAD	WHITE
TCGA-24-1544	OV	BLACK OR AFRICAN AMERICAN
TCGA-AA-3862	COADREAD	NA/UK
TCGA-BR-7851	STAD	WHITE
TCGA-AR-A1AM	BRCA	WHITE
TCGA-A5-A0GV	UCEC	WHITE
TCGA-EY-A1GR	UCEC	BLACK OR AFRICAN AMERICAN
TCGA-BQ-7049	KIRP	WHITE
TCGA-BH-A1EU	BRCA	WHITE
TCGA-C5-A7CJ	CESC	WHITE
TCGA-06-0168	GBM	WHITE
TCGA-60-2722	LUSC	WHITE
TCGA-P4-A5EA	KIRP	WHITE
TCGA-BR-4188	STAD	WHITE
TCGA-75-6211	LUAD	NA/UK
TCGA-D3-A8GN	SKCM	WHITE
TCGA-DT-5265	COADREAD	ASIAN
TCGA-AP-A5FX	UCEC	BLACK OR AFRICAN AMERICAN
TCGA-14-1453	GBM	WHITE
TCGA-AR-A1AL	BRCA	WHITE
TCGA-CV-7434	HNSC	WHITE
TCGA-AP-A0LJ	UCEC	WHITE
TCGA-E1-5303	LGG	WHITE
TCGA-99-8028	LUAD	BLACK OR AFRICAN AMERICAN
TCGA-CM-6674	COADREAD	WHITE
TCGA-AB-2807	LAML	WHITE
TCGA-K4-A5RI	BLCA	NA/UK
TCGA-85-A512	LUSC	WHITE
TCGA-E6-A1M0	UCEC	WHITE
TCGA-AC-A3HN	BRCA	WHITE
TCGA-FU-A3TQ	CESC	WHITE
TCGA-IA-A83W	KIRP	WHITE
TCGA-22-4596	LUSC	WHITE
TCGA-B0-5711	KIRC	WHITE
TCGA-QN-A5NN	UCS	ASIAN
TCGA-2G-AAM3	TGCT	NA/UK
TCGA-EY-A2ON	UCEC	BLACK OR AFRICAN AMERICAN
TCGA-A7-A6VV	BRCA	BLACK OR AFRICAN AMERICAN
TCGA-FD-A3B3	BLCA	WHITE
TCGA-BR-8364	STAD	WHITE
TCGA-BH-A18F	BRCA	WHITE
TCGA-36-2544	OV	NA/UK
TCGA-50-5930	LUAD	WHITE
TCGA-VQ-A8DL	STAD	WHITE
TCGA-XF-AAN7	BLCA	WHITE
TCGA-DX-A8BT	SARC	WHITE
TCGA-VQ-A8PK	STAD	WHITE
TCGA-HC-7210	PRAD	WHITE
TCGA-EA-A50E	CESC	ASIAN
TCGA-EM-A4G1	THCA	NA/UK
TCGA-BQ-7050	KIRP	WHITE
TCGA-98-A53B	LUSC	WHITE
TCGA-B5-A0K0	UCEC	WHITE
TCGA-DX-A3UE	SARC	WHITE
TCGA-CI-6624	COADREAD	WHITE
TCGA-E6-A1LZ	UCEC	BLACK OR AFRICAN AMERICAN
TCGA-J2-A4AD	LUAD	WHITE
TCGA-VS-A9UQ	CESC	NA/UK
TCGA-DK-A1AF	BLCA	WHITE
TCGA-D8-A27R	BRCA	WHITE
TCGA-24-1847	OV	WHITE
TCGA-AA-A03J	COADREAD	NA/UK
TCGA-14-1455	GBM	WHITE
TCGA-AZ-6608	COADREAD	WHITE
TCGA-MM-A563	KIRC	BLACK OR AFRICAN AMERICAN
TCGA-FG-A6IZ	LGG	WHITE
TCGA-FB-A7DR	PAAD	ASIAN
TCGA-PG-A917	UCEC	BLACK OR AFRICAN AMERICAN
TCGA-VN-A88Q	PRAD	NA/UK
TCGA-B0-5402	KIRC	WHITE
TCGA-AD-6965	COADREAD	WHITE
TCGA-ER-A42K	SKCM	WHITE
TCGA-UF-A7JS	HNSC	WHITE
TCGA-BR-6852	STAD	WHITE
TCGA-RS-A6TP	HNSC	WHITE
TCGA-62-8397	LUAD	WHITE
TCGA-77-A5G3	LUSC	NA/UK
TCGA-DD-A1E9	LIHC	WHITE
TCGA-VS-A8EL	CESC	BLACK OR AFRICAN AMERICAN
TCGA-FK-A3S3	THCA	BLACK OR AFRICAN AMERICAN
TCGA-C8-A12W	BRCA	ASIAN
TCGA-F5-6814	COADREAD	WHITE
TCGA-BH-A0HP	BRCA	WHITE
TCGA-ND-A4WC	UCS	ASIAN
TCGA-KN-8422	KICH	WHITE
TCGA-96-7544	LUSC	WHITE
TCGA-14-3476	GBM	WHITE
TCGA-5P-A9JU	KIRP	NA/UK
TCGA-BG-A0YU	UCEC	WHITE
TCGA-D8-A1XR	BRCA	WHITE
TCGA-UF-A71E	HNSC	WHITE
TCGA-AN-A0XR	BRCA	WHITE
TCGA-58-8392	LUSC	WHITE
TCGA-OL-A66J	BRCA	WHITE
TCGA-C8-A1HG	BRCA	ASIAN
TCGA-A5-A0VQ	UCEC	NA/UK
TCGA-OR-A5JF	ACC	WHITE
TCGA-E9-A6HE	BRCA	WHITE
TCGA-AN-A04D	BRCA	WHITE
TCGA-46-3766	LUSC	WHITE
TCGA-BP-5009	KIRC	WHITE
TCGA-VT-AB3D	SARC	WHITE
TCGA-VP-A872	PRAD	NA/UK
TCGA-PK-A5HC	ACC	ASIAN
TCGA-85-A511	LUSC	WHITE
TCGA-69-7979	LUAD	WHITE
TCGA-FP-A8CX	STAD	WHITE
TCGA-95-7039	LUAD	WHITE
TCGA-EL-A3MW	THCA	WHITE
TCGA-BQ-5882	KIRP	NA/UK
TCGA-WB-A81F	PCPG	WHITE
TCGA-CA-6718	COADREAD	ASIAN
TCGA-PT-A8TR	SARC	WHITE
TCGA-B5-A0KB	UCEC	BLACK OR AFRICAN AMERICAN
TCGA-G2-A3IE	BLCA	WHITE
TCGA-HC-8264	PRAD	NA/UK
TCGA-O2-A52Q	LUSC	WHITE
TCGA-FU-A5XV	CESC	WHITE
TCGA-UB-A7MD	LIHC	NA/UK
TCGA-LN-A8I1	ESCA	NA/UK
TCGA-BG-A0MI	UCEC	WHITE
TCGA-HZ-A8P1	PAAD	WHITE
TCGA-CC-5264	LIHC	ASIAN
TCGA-E2-A1LL	BRCA	BLACK OR AFRICAN AMERICAN
TCGA-CR-6480	HNSC	WHITE
TCGA-EY-A548	UCEC	BLACK OR AFRICAN AMERICAN
TCGA-KP-A3W0	UCEC	NA/UK
TCGA-CC-5259	LIHC	ASIAN
TCGA-QT-A7U0	PCPG	WHITE
TCGA-V1-A8MG	PRAD	NA/UK
TCGA-VR-AA4G	ESCA	WHITE
TCGA-P5-A780	LGG	NA/UK
TCGA-V4-A9EW	UVM	WHITE
TCGA-QK-A64Z	HNSC	WHITE
TCGA-HC-7230	PRAD	WHITE
TCGA-V4-A9EH	UVM	NA/UK
TCGA-78-7535	LUAD	WHITE
TCGA-OL-A5RU	BRCA	BLACK OR AFRICAN AMERICAN
TCGA-06-0882	GBM	WHITE
TCGA-HT-7692	LGG	WHITE
TCGA-06-0126	GBM	WHITE
TCGA-92-7340	LUSC	WHITE
TCGA-AP-A1DO	UCEC	WHITE
TCGA-D3-A1Q3	SKCM	WHITE
TCGA-AA-3989	COADREAD	NA/UK
TCGA-D3-A2J9	SKCM	WHITE
TCGA-XF-A9SK	BLCA	NA/UK
TCGA-BC-A10Z	LIHC	WHITE
TCGA-55-8511	LUAD	WHITE
TCGA-FD-A6TH	BLCA	WHITE
TCGA-AC-A6IW	BRCA	BLACK OR AFRICAN AMERICAN
TCGA-B0-5104	KIRC	WHITE
TCGA-ND-A4W6	UCS	BLACK OR AFRICAN AMERICAN
TCGA-E8-A419	THCA	WHITE
TCGA-BH-A0HN	BRCA	WHITE
TCGA-17-Z000	LUAD	NA/UK
TCGA-WB-A81W	PCPG	WHITE
TCGA-D5-6533	COADREAD	WHITE
TCGA-06-0749	GBM	BLACK OR AFRICAN AMERICAN
TCGA-V1-A9O5	PRAD	NA/UK
TCGA-CV-6951	HNSC	WHITE
TCGA-A1-A0SP	BRCA	NA/UK
TCGA-L5-A8NG	ESCA	WHITE
TCGA-EE-A2GI	SKCM	WHITE
TCGA-KO-8416	KICH	WHITE
TCGA-FI-A2F4	UCEC	BLACK OR AFRICAN AMERICAN
TCGA-06-2565	GBM	ASIAN
TCGA-E1-A7YU	LGG	NA/UK
TCGA-VP-A875	PRAD	NA/UK
TCGA-AR-A1AT	BRCA	WHITE
TCGA-ER-A195	SKCM	WHITE
TCGA-UD-AAC5	MESO	WHITE
TCGA-QQ-A8VH	SARC	WHITE
TCGA-G3-A25T	LIHC	WHITE
TCGA-13-2065	OV	BLACK OR AFRICAN AMERICAN
TCGA-18-3409	LUSC	NA/UK
TCGA-CW-5591	KIRC	WHITE
TCGA-EM-A2CO	THCA	NA/UK
TCGA-D3-A2JA	SKCM	WHITE
TCGA-DJ-A3UT	THCA	WHITE
TCGA-FS-A4FC	SKCM	WHITE
TCGA-Y8-A896	KIRP	WHITE
TCGA-DJ-A3UK	THCA	WHITE
TCGA-D7-6818	STAD	WHITE
TCGA-61-2018	OV	WHITE
TCGA-CE-A3ME	THCA	ASIAN
TCGA-DJ-A3UW	THCA	WHITE
TCGA-D8-A4Z1	BRCA	WHITE
TCGA-RL-AAAS	PAAD	WHITE
TCGA-LN-A4A1	ESCA	ASIAN
TCGA-A7-A5ZX	BRCA	WHITE
TCGA-E1-5305	LGG	WHITE
TCGA-17-Z033	LUAD	NA/UK
TCGA-BH-A42U	BRCA	BLACK OR AFRICAN AMERICAN
TCGA-CM-5862	COADREAD	WHITE
TCGA-BQ-5878	KIRP	WHITE
TCGA-AP-A051	UCEC	WHITE
TCGA-HU-A4GY	STAD	ASIAN
TCGA-AJ-A3OL	UCEC	WHITE
TCGA-AA-3667	COADREAD	NA/UK
TCGA-HU-8249	STAD	ASIAN
TCGA-D6-A6ES	HNSC	WHITE
TCGA-62-A46P	LUAD	WHITE
TCGA-AA-A02R	COADREAD	NA/UK
TCGA-A6-6137	COADREAD	WHITE
TCGA-ZJ-AAXB	CESC	NA/UK
TCGA-24-1416	OV	WHITE
TCGA-CI-6621	COADREAD	WHITE
TCGA-CV-7180	HNSC	WHITE
TCGA-B1-7332	KIRP	BLACK OR AFRICAN AMERICAN
TCGA-DX-A3UB	SARC	WHITE
TCGA-CM-5348	COADREAD	WHITE
TCGA-WE-A8K5	SKCM	WHITE
TCGA-BH-A8FY	BRCA	WHITE
TCGA-77-8145	LUSC	NA/UK
TCGA-DU-A76L	LGG	WHITE
TCGA-UC-A7PG	CESC	WHITE
TCGA-BQ-5889	KIRP	WHITE
TCGA-77-7140	LUSC	WHITE
TCGA-DD-AACC	LIHC	NA/UK
TCGA-EE-A2GE	SKCM	WHITE
TCGA-FY-A3NN	THCA	NA/UK
TCGA-CN-A499	HNSC	WHITE
TCGA-TT-A6YJ	PCPG	NA/UK
TCGA-B0-5102	KIRC	WHITE
TCGA-KR-A7K0	LIHC	NA/UK
TCGA-B5-A0JZ	UCEC	WHITE
TCGA-DQ-7594	HNSC	WHITE
TCGA-AP-A05J	UCEC	WHITE
TCGA-FB-AAPY	PAAD	WHITE
TCGA-G9-7521	PRAD	NA/UK
TCGA-BH-A0H6	BRCA	WHITE
TCGA-US-A776	PAAD	WHITE
TCGA-DJ-A2Q8	THCA	NA/UK
TCGA-5X-AA5U	OV	NA/UK
TCGA-KV-A6GE	KIRP	WHITE
TCGA-GU-A42P	BLCA	WHITE
TCGA-HC-7213	PRAD	WHITE
TCGA-E8-A416	THCA	ASIAN
TCGA-AG-3906	COADREAD	NA/UK
TCGA-LL-A73Z	BRCA	BLACK OR AFRICAN AMERICAN
TCGA-AB-2825	LAML	WHITE
TCGA-WC-A87W	UVM	WHITE
TCGA-CV-7242	HNSC	WHITE
TCGA-VQ-A92D	STAD	NA/UK
TCGA-EL-A3CW	THCA	WHITE
TCGA-GI-A2C8	BRCA	WHITE
TCGA-DX-AB2L	SARC	WHITE
TCGA-DD-AADY	LIHC	NA/UK
TCGA-62-A471	LUAD	WHITE
TCGA-24-1464	OV	WHITE
TCGA-XD-AAUG	PAAD	WHITE
TCGA-V7-A7HQ	BRCA	NA/UK
TCGA-69-8253	LUAD	BLACK OR AFRICAN AMERICAN
TCGA-BS-A0TA	UCEC	NATIVE HAWAIIAN OR OTHER PACIFIC ISLANDER
TCGA-QK-A6VB	HNSC	NA/UK
TCGA-FF-8043	DLBL	ASIAN
TCGA-E9-A3HO	BRCA	WHITE
TCGA-AX-A2IN	UCEC	WHITE
TCGA-50-5936	LUAD	WHITE
TCGA-FR-A729	SKCM	WHITE
TCGA-DD-AAD6	LIHC	NA/UK
TCGA-VQ-A94O	STAD	NA/UK
TCGA-IG-A5B8	ESCA	WHITE
TCGA-CC-A3MB	LIHC	ASIAN
TCGA-BA-4077	HNSC	WHITE
TCGA-E7-A3X6	BLCA	WHITE
TCGA-ZJ-AAXT	CESC	NA/UK
TCGA-2G-AAG3	TGCT	NA/UK
TCGA-LL-A6FR	BRCA	BLACK OR AFRICAN AMERICAN
TCGA-EL-A3T1	THCA	BLACK OR AFRICAN AMERICAN
TCGA-2H-A9GH	ESCA	NA/UK
TCGA-E2-A15G	BRCA	WHITE
TCGA-LN-A7HW	ESCA	ASIAN
TCGA-04-1336	OV	WHITE
TCGA-EO-A22X	UCEC	NA/UK
TCGA-DK-A1AD	BLCA	WHITE
TCGA-VQ-A927	STAD	WHITE
TCGA-ET-A39R	THCA	WHITE
TCGA-55-8505	LUAD	WHITE
TCGA-FJ-A3Z7	BLCA	WHITE
TCGA-69-7763	LUAD	WHITE
TCGA-EL-A3H5	THCA	WHITE
TCGA-HF-7136	STAD	NA/UK
TCGA-S3-A6ZG	BRCA	BLACK OR AFRICAN AMERICAN
TCGA-CD-8534	STAD	ASIAN
TCGA-XC-AA0X	LUSC	BLACK OR AFRICAN AMERICAN
TCGA-SR-A6MR	PCPG	WHITE
TCGA-CC-A3MA	LIHC	ASIAN
TCGA-HC-8216	PRAD	NA/UK
TCGA-77-7142	LUSC	WHITE
TCGA-DX-A2J0	SARC	NA/UK
TCGA-55-8301	LUAD	WHITE
TCGA-ER-A194	SKCM	WHITE
TCGA-CN-6997	HNSC	WHITE
TCGA-IG-A4QS	ESCA	WHITE
TCGA-BP-5181	KIRC	WHITE
TCGA-R8-A6MO	LGG	ASIAN
TCGA-AP-A0LH	UCEC	WHITE
TCGA-KK-A59Y	PRAD	NA/UK
TCGA-AX-A2H2	UCEC	BLACK OR AFRICAN AMERICAN
TCGA-AP-A1E4	UCEC	WHITE
TCGA-FS-A1Z4	SKCM	WHITE
TCGA-XD-AAUH	PAAD	WHITE
TCGA-43-8118	LUSC	WHITE
TCGA-EJ-7125	PRAD	WHITE
TCGA-SP-A6QD	PCPG	NA/UK
TCGA-G3-AAV4	LIHC	NA/UK
TCGA-06-0879	GBM	WHITE
TCGA-61-2092	OV	WHITE
TCGA-04-1357	OV	NA/UK
TCGA-B5-A0K1	UCEC	WHITE
TCGA-G9-6496	PRAD	WHITE
TCGA-73-4675	LUAD	WHITE
TCGA-61-1904	OV	WHITE
TCGA-69-7973	LUAD	WHITE
TCGA-B2-3923	KIRC	WHITE
TCGA-50-5044	LUAD	WHITE
TCGA-06-0881	GBM	WHITE
TCGA-WC-A87T	UVM	WHITE
TCGA-AR-A24W	BRCA	WHITE
TCGA-HT-7858	LGG	WHITE
TCGA-KO-8408	KICH	WHITE
TCGA-A8-A08B	BRCA	NA/UK
TCGA-BH-A18I	BRCA	WHITE
TCGA-AK-3427	KIRC	WHITE
TCGA-FG-8187	LGG	WHITE
TCGA-EE-A2M7	SKCM	WHITE
TCGA-55-7227	LUAD	WHITE
TCGA-A5-A2K7	UCEC	NA/UK
TCGA-E2-A14Q	BRCA	WHITE
TCGA-FI-A2EU	UCEC	NA/UK
TCGA-A5-A0GX	UCEC	WHITE
TCGA-X6-A7W8	SARC	NA/UK
TCGA-06-0238	GBM	WHITE
TCGA-78-7146	LUAD	WHITE
TCGA-CJ-4920	KIRC	WHITE
TCGA-08-0386	GBM	WHITE
TCGA-WE-A8ZX	SKCM	WHITE
TCGA-AB-2903	LAML	WHITE
TCGA-CV-7097	HNSC	WHITE
TCGA-YC-A9TC	BLCA	WHITE
TCGA-UP-A6WW	HNSC	NA/UK
TCGA-GF-A6C8	SKCM	WHITE
TCGA-DD-AACB	LIHC	NA/UK
TCGA-DD-AAE3	LIHC	NA/UK
TCGA-AG-3999	COADREAD	NA/UK
TCGA-17-Z009	LUAD	NA/UK
TCGA-E7-A8O7	BLCA	ASIAN
TCGA-FA-A82F	DLBL	ASIAN
TCGA-SX-A7SM	KIRP	BLACK OR AFRICAN AMERICAN
TCGA-A7-A0DB	BRCA	WHITE
TCGA-FG-A70Z	LGG	BLACK OR AFRICAN AMERICAN
TCGA-HW-A5KL	LGG	WHITE
TCGA-EJ-A6RC	PRAD	NA/UK
TCGA-C5-A1ME	CESC	WHITE
TCGA-TQ-A7RM	LGG	NA/UK
TCGA-AR-A5QQ	BRCA	WHITE
TCGA-91-6831	LUAD	WHITE
TCGA-DU-A5TR	LGG	WHITE
TCGA-2L-AAQM	PAAD	WHITE
TCGA-GM-A2DO	BRCA	BLACK OR AFRICAN AMERICAN
TCGA-A2-A0YL	BRCA	WHITE
TCGA-HT-7478	LGG	WHITE
TCGA-G9-6499	PRAD	WHITE
TCGA-AB-2904	LAML	WHITE
TCGA-EJ-A65M	PRAD	NA/UK
TCGA-Q1-A6DT	CESC	WHITE
TCGA-06-0154	GBM	WHITE
TCGA-AJ-A3NF	UCEC	WHITE
TCGA-BH-A1EV	BRCA	WHITE
TCGA-17-Z026	LUAD	NA/UK
TCGA-UF-A71D	HNSC	WHITE
TCGA-VQ-A8PT	STAD	WHITE
TCGA-CR-7399	HNSC	WHITE
TCGA-F5-6465	COADREAD	WHITE
TCGA-BR-8381	STAD	WHITE
TCGA-EB-A5SG	SKCM	WHITE
TCGA-S9-A6WN	LGG	WHITE
TCGA-59-2351	OV	WHITE
TCGA-S9-A6TU	LGG	WHITE
TCGA-AA-3952	COADREAD	NA/UK
TCGA-BR-8687	STAD	WHITE
TCGA-TT-A6YP	PCPG	WHITE
TCGA-B8-5165	KIRC	WHITE
TCGA-AY-4071	COADREAD	WHITE
TCGA-VP-A87H	PRAD	NA/UK
TCGA-FL-A3WE	UCEC	NA/UK
TCGA-18-3417	LUSC	NA/UK
TCGA-EM-A22K	THCA	NA/UK
TCGA-A4-A772	KIRP	WHITE
TCGA-HQ-A5NE	BLCA	NA/UK
TCGA-A8-A07W	BRCA	NA/UK
TCGA-66-2742	LUSC	NA/UK
TCGA-B2-4102	KIRC	WHITE
TCGA-A4-8098	KIRP	BLACK OR AFRICAN AMERICAN
TCGA-VS-A9UA	CESC	WHITE
TCGA-ZG-A9L1	PRAD	NA/UK
TCGA-FG-A6J3	LGG	WHITE
TCGA-EB-A51B	SKCM	WHITE
TCGA-4A-A93X	KIRP	NA/UK
TCGA-A2-A0YM	BRCA	WHITE
TCGA-CN-4739	HNSC	WHITE
TCGA-A2-A25C	BRCA	WHITE
TCGA-BP-4167	KIRC	WHITE
TCGA-C5-A1M7	CESC	WHITE
TCGA-14-3477	GBM	BLACK OR AFRICAN AMERICAN
TCGA-AJ-A23O	UCEC	WHITE
TCGA-DI-A1NO	UCEC	BLACK OR AFRICAN AMERICAN
TCGA-EK-A2RA	CESC	NA/UK
TCGA-AP-A1E3	UCEC	WHITE
TCGA-R8-A6ML	LGG	WHITE
TCGA-BH-A0BO	BRCA	WHITE
TCGA-AR-A0TW	BRCA	WHITE
TCGA-3A-A9IU	PAAD	WHITE
TCGA-EB-A430	SKCM	WHITE
TCGA-06-2563	GBM	WHITE
TCGA-13-0758	OV	WHITE
TCGA-78-7166	LUAD	WHITE
TCGA-44-6778	LUAD	BLACK OR AFRICAN AMERICAN
TCGA-VS-A954	CESC	NA/UK
TCGA-KH-A6WC	ESCA	WHITE
TCGA-YS-AA4M	MESO	WHITE
TCGA-VM-A8C9	LGG	NA/UK
TCGA-MK-A4N6	THCA	WHITE
TCGA-HC-A6AQ	PRAD	NA/UK
TCGA-F9-A97G	KIRP	ASIAN
TCGA-K4-A5RJ	BLCA	WHITE
TCGA-R6-A6XQ	ESCA	WHITE
TCGA-DX-AB2F	SARC	WHITE
TCGA-FS-A4F9	SKCM	WHITE
TCGA-BB-8596	HNSC	WHITE
TCGA-BH-A0BV	BRCA	WHITE
TCGA-DJ-A1QG	THCA	WHITE
TCGA-N6-A4V9	UCS	WHITE
TCGA-42-2590	OV	WHITE
TCGA-4Z-AA84	BLCA	NA/UK
TCGA-BJ-A4O9	THCA	WHITE
TCGA-FE-A236	THCA	WHITE
TCGA-EE-A29A	SKCM	WHITE
TCGA-AB-2836	LAML	WHITE
TCGA-92-8063	LUSC	WHITE
TCGA-V5-A7RB	ESCA	NA/UK
TCGA-CM-5863	COADREAD	WHITE
TCGA-LQ-A4E4	BRCA	WHITE
TCGA-AR-A2LJ	BRCA	WHITE
TCGA-5P-A9JV	KIRP	NA/UK
TCGA-25-1328	OV	WHITE
TCGA-ER-A2NE	SKCM	WHITE
TCGA-A8-A07Z	BRCA	NA/UK
TCGA-02-2485	GBM	BLACK OR AFRICAN AMERICAN
TCGA-56-8623	LUSC	NA/UK
TCGA-HT-7610	LGG	WHITE
TCGA-BA-5555	HNSC	BLACK OR AFRICAN AMERICAN
TCGA-RY-A843	LGG	NA/UK
TCGA-DB-A64X	LGG	WHITE
TCGA-EI-6514	COADREAD	WHITE
TCGA-AB-2823	LAML	WHITE
TCGA-KL-8327	KICH	WHITE
TCGA-CV-A6K2	HNSC	WHITE
TCGA-J4-A67O	PRAD	NA/UK
TCGA-N8-A56S	UCS	WHITE
TCGA-10-0934	OV	WHITE
TCGA-24-0970	OV	WHITE
TCGA-06-5858	GBM	WHITE
TCGA-K4-A3WU	BLCA	NA/UK
TCGA-KN-8419	KICH	BLACK OR AFRICAN AMERICAN
TCGA-05-4398	LUAD	NA/UK
TCGA-WT-AB41	BRCA	BLACK OR AFRICAN AMERICAN
TCGA-A4-A6HP	KIRP	WHITE
TCGA-02-2483	GBM	ASIAN
TCGA-85-7710	LUSC	WHITE
TCGA-X8-AAAR	ESCA	WHITE
TCGA-CM-6161	COADREAD	WHITE
TCGA-O1-A52J	LUAD	NA/UK
TCGA-VD-A8KF	UVM	NA/UK
TCGA-CG-5733	STAD	NA/UK
TCGA-GM-A2DI	BRCA	WHITE
TCGA-RD-A8N6	STAD	WHITE
TCGA-D8-A142	BRCA	WHITE
TCGA-CA-5796	COADREAD	ASIAN
TCGA-CZ-5988	KIRC	WHITE
TCGA-D7-6524	STAD	WHITE
TCGA-MP-A4TH	LUAD	WHITE
TCGA-EM-A22L	THCA	NA/UK
TCGA-AX-A3FW	UCEC	WHITE
TCGA-85-8580	LUSC	WHITE
TCGA-EW-A1PB	BRCA	BLACK OR AFRICAN AMERICAN
TCGA-57-1992	OV	NA/UK
TCGA-HU-A4GN	STAD	ASIAN
TCGA-B2-5636	KIRC	WHITE
TCGA-BP-5008	KIRC	WHITE
TCGA-06-0209	GBM	WHITE
TCGA-32-4208	GBM	WHITE
TCGA-A2-A3XT	BRCA	BLACK OR AFRICAN AMERICAN
TCGA-A2-A04Q	BRCA	WHITE
TCGA-BH-A0HX	BRCA	WHITE
TCGA-W3-AA1W	SKCM	WHITE
TCGA-BJ-A45G	THCA	WHITE
TCGA-FB-AAQ1	PAAD	WHITE
TCGA-AB-2809	LAML	WHITE
TCGA-33-AASI	LUSC	BLACK OR AFRICAN AMERICAN
TCGA-A5-A0G2	UCEC	ASIAN
TCGA-EL-A3CY	THCA	WHITE
TCGA-CM-5864	COADREAD	WHITE
TCGA-60-2723	LUSC	WHITE
TCGA-FI-A2D6	UCEC	WHITE
TCGA-ED-A7PX	LIHC	NA/UK
TCGA-23-2084	OV	WHITE
TCGA-GU-AATO	BLCA	WHITE
TCGA-24-2261	OV	WHITE
TCGA-W2-A7HB	PCPG	WHITE
TCGA-IS-A3K6	SARC	WHITE
TCGA-KK-A8ID	PRAD	NA/UK
TCGA-06-2561	GBM	WHITE
TCGA-HT-7880	LGG	WHITE
TCGA-AA-3819	COADREAD	NA/UK
TCGA-HC-7745	PRAD	WHITE
TCGA-BR-A4CS	STAD	WHITE
TCGA-HD-8635	HNSC	WHITE
TCGA-G4-6322	COADREAD	WHITE
TCGA-VM-A8CF	LGG	NA/UK
TCGA-C5-A8YT	CESC	WHITE
TCGA-XF-A8HF	BLCA	WHITE
TCGA-FI-A3PV	UCEC	BLACK OR AFRICAN AMERICAN
TCGA-91-6829	LUAD	WHITE
TCGA-29-2436	OV	WHITE
TCGA-BF-A3DL	SKCM	WHITE
TCGA-CD-5799	STAD	ASIAN
TCGA-HC-7080	PRAD	WHITE
TCGA-ZG-A9KY	PRAD	NA/UK
TCGA-EM-A3AO	THCA	NA/UK
TCGA-CR-7382	HNSC	WHITE
TCGA-06-0877	GBM	WHITE
TCGA-DD-A73E	LIHC	NA/UK
TCGA-44-A47A	LUAD	WHITE
TCGA-LD-A7W6	BRCA	WHITE
TCGA-2J-AAB6	PAAD	WHITE
TCGA-E2-A3DX	BRCA	WHITE
TCGA-AX-A0J0	UCEC	WHITE
TCGA-CJ-4639	KIRC	WHITE
TCGA-CK-5915	COADREAD	WHITE
TCGA-33-6737	LUSC	WHITE
TCGA-B0-5705	KIRC	WHITE
TCGA-GV-A3QG	BLCA	WHITE
TCGA-A8-A082	BRCA	NA/UK
TCGA-02-0047	GBM	WHITE
TCGA-2Y-A9HA	LIHC	NA/UK
TCGA-2Z-A9JR	KIRP	WHITE
TCGA-L5-A43M	ESCA	NA/UK
TCGA-XY-A9T9	TGCT	WHITE
TCGA-VD-A8KL	UVM	NA/UK
TCGA-AO-A12A	BRCA	WHITE
TCGA-ER-A3PL	SKCM	WHITE
TCGA-86-8055	LUAD	WHITE
TCGA-86-8673	LUAD	WHITE
TCGA-L5-A88S	ESCA	WHITE
TCGA-66-2777	LUSC	NA/UK
TCGA-EA-A5O9	CESC	WHITE
TCGA-2G-AAHN	TGCT	WHITE
TCGA-AX-A3G4	UCEC	NATIVE HAWAIIAN OR OTHER PACIFIC ISLANDER
TCGA-DC-6158	COADREAD	WHITE
TCGA-DK-A1A5	BLCA	WHITE
TCGA-DU-A7TJ	LGG	BLACK OR AFRICAN AMERICAN
TCGA-WC-A87Y	UVM	WHITE
TCGA-DD-AACT	LIHC	NA/UK
TCGA-S5-AA26	BLCA	BLACK OR AFRICAN AMERICAN
TCGA-VQ-A94U	STAD	NA/UK
TCGA-FJ-A3ZE	BLCA	WHITE
TCGA-VD-AA8O	UVM	NA/UK
TCGA-06-0744	GBM	WHITE
TCGA-BJ-A4O8	THCA	WHITE
TCGA-CC-A9FW	LIHC	NA/UK
TCGA-AJ-A3EK	UCEC	WHITE
TCGA-G4-6304	COADREAD	WHITE
TCGA-HT-A61A	LGG	WHITE
TCGA-S9-A6U6	LGG	WHITE
TCGA-44-3919	LUAD	WHITE
TCGA-AP-A1DH	UCEC	WHITE
TCGA-23-1118	OV	WHITE
TCGA-EJ-7786	PRAD	WHITE
TCGA-AA-3875	COADREAD	NA/UK
TCGA-A6-A566	COADREAD	BLACK OR AFRICAN AMERICAN
TCGA-31-1959	OV	WHITE
TCGA-23-2649	OV	WHITE
TCGA-CS-6669	LGG	WHITE
TCGA-B6-A0IM	BRCA	BLACK OR AFRICAN AMERICAN
TCGA-BS-A0TE	UCEC	ASIAN
TCGA-CZ-4863	KIRC	WHITE
TCGA-XF-AAN4	BLCA	WHITE
TCGA-29-1710	OV	WHITE
TCGA-CD-5803	STAD	ASIAN
TCGA-WK-A8XO	SARC	WHITE
TCGA-LN-A49Y	ESCA	ASIAN
TCGA-DU-7301	LGG	WHITE
TCGA-B0-4810	KIRC	WHITE
TCGA-PL-A8LV	BRCA	BLACK OR AFRICAN AMERICAN
TCGA-AB-2819	LAML	WHITE
TCGA-EJ-5518	PRAD	WHITE
TCGA-B0-5075	KIRC	WHITE
TCGA-BJ-A45I	THCA	WHITE
TCGA-2G-AAG9	TGCT	WHITE
TCGA-CV-A6JO	HNSC	WHITE
TCGA-CN-A63Y	HNSC	WHITE
TCGA-2G-AAGS	TGCT	WHITE
TCGA-55-A493	LUAD	WHITE
TCGA-HZ-A4BK	PAAD	WHITE
TCGA-D1-A3DH	UCEC	WHITE
TCGA-61-1899	OV	WHITE
TCGA-DX-A6Z0	SARC	WHITE
TCGA-C8-A1HF	BRCA	ASIAN
TCGA-BB-A6UO	HNSC	NA/UK
TCGA-29-1775	OV	WHITE
TCGA-VQ-A8PJ	STAD	NA/UK
TCGA-50-5045	LUAD	BLACK OR AFRICAN AMERICAN
TCGA-13-0905	OV	WHITE
TCGA-GV-A3QF	BLCA	WHITE
TCGA-AN-A0FL	BRCA	WHITE
TCGA-ED-A4XI	LIHC	ASIAN
TCGA-34-5241	LUSC	WHITE
TCGA-CS-5395	LGG	BLACK OR AFRICAN AMERICAN
TCGA-95-A4VN	LUAD	WHITE
TCGA-LB-A8F3	PAAD	BLACK OR AFRICAN AMERICAN
TCGA-RC-A7S9	LIHC	NA/UK
TCGA-DX-A2J4	SARC	NA/UK
TCGA-06-0875	GBM	WHITE
TCGA-DF-A2KU	UCEC	NA/UK
TCGA-DD-AAVX	LIHC	NA/UK
TCGA-13-0924	OV	WHITE
TCGA-W2-A7HC	PCPG	WHITE
TCGA-2G-AAF8	TGCT	WHITE
TCGA-HP-A5N0	LIHC	NA/UK
TCGA-AA-3845	COADREAD	NA/UK
TCGA-2G-AAGF	TGCT	WHITE
TCGA-EJ-7781	PRAD	WHITE
TCGA-YU-A94D	TGCT	NA/UK
TCGA-24-1842	OV	WHITE
TCGA-AO-A0JM	BRCA	NA/UK
TCGA-AC-A2FO	BRCA	WHITE
TCGA-AO-A12B	BRCA	WHITE
TCGA-CD-8535	STAD	ASIAN
TCGA-61-1915	OV	WHITE
TCGA-85-A510	LUSC	WHITE
TCGA-G3-A25Z	LIHC	ASIAN
TCGA-BR-4187	STAD	WHITE
TCGA-EM-A3FO	THCA	NA/UK
TCGA-EJ-5504	PRAD	WHITE
TCGA-HZ-A49G	PAAD	WHITE
TCGA-HC-A6AL	PRAD	NA/UK
TCGA-KL-8335	KICH	WHITE
TCGA-85-8049	LUSC	WHITE
TCGA-MT-A67G	HNSC	WHITE
TCGA-N5-A4RV	UCS	WHITE
TCGA-77-A5GH	LUSC	NA/UK
TCGA-55-7913	LUAD	NA/UK
TCGA-LB-A9Q5	PAAD	WHITE
TCGA-34-5928	LUSC	WHITE
TCGA-B0-5121	KIRC	WHITE
TCGA-DK-A3IQ	BLCA	WHITE
TCGA-E2-A15P	BRCA	WHITE
TCGA-CJ-5672	KIRC	WHITE
TCGA-EE-A29D	SKCM	WHITE
TCGA-GN-A4U3	SKCM	WHITE
TCGA-55-7573	LUAD	WHITE
TCGA-QU-A6IO	PRAD	NA/UK
TCGA-NH-A8F7	COADREAD	BLACK OR AFRICAN AMERICAN
TCGA-VQ-A8PQ	STAD	WHITE
TCGA-D1-A0ZU	UCEC	WHITE
TCGA-E1-A7YK	LGG	NA/UK
TCGA-FU-A2QG	CESC	WHITE
TCGA-BK-A0C9	UCEC	WHITE
TCGA-EC-A1QX	UCEC	WHITE
TCGA-XY-A8S2	TGCT	NA/UK
TCGA-Z7-A8R6	BRCA	WHITE
TCGA-EL-A3ZG	THCA	ASIAN
TCGA-E9-A1N8	BRCA	WHITE
TCGA-58-A46N	LUSC	WHITE
TCGA-E9-A5FK	BRCA	WHITE
TCGA-2J-AABO	PAAD	WHITE
TCGA-HT-A614	LGG	WHITE
TCGA-06-5856	GBM	WHITE
TCGA-NC-A5HE	LUSC	WHITE
TCGA-05-4427	LUAD	NA/UK
TCGA-C5-A7CG	CESC	WHITE
TCGA-L5-A43I	ESCA	NA/UK
TCGA-12-0822	GBM	WHITE
TCGA-D3-A8GQ	SKCM	WHITE
TCGA-BH-A0AZ	BRCA	WHITE
TCGA-AG-4008	COADREAD	NA/UK
TCGA-XF-A9SP	BLCA	NA/UK
TCGA-RB-AA9M	PAAD	WHITE
TCGA-B5-A11F	UCEC	WHITE
TCGA-FR-A7UA	SKCM	WHITE
TCGA-F5-6864	COADREAD	WHITE
TCGA-BP-5195	KIRC	WHITE
TCGA-NC-A5HH	LUSC	WHITE
TCGA-A2-A0CX	BRCA	WHITE
TCGA-3Z-A93Z	KIRC	BLACK OR AFRICAN AMERICAN
TCGA-CR-6493	HNSC	BLACK OR AFRICAN AMERICAN
TCGA-KL-8334	KICH	WHITE
TCGA-WE-A8ZQ	SKCM	NA/UK
TCGA-BJ-A2N7	THCA	WHITE
TCGA-2A-A8VT	PRAD	NA/UK
TCGA-E9-A1NC	BRCA	WHITE
TCGA-D1-A168	UCEC	WHITE
TCGA-DV-5575	KIRC	WHITE
TCGA-EL-A4KH	THCA	WHITE
TCGA-E9-A1N5	BRCA	WHITE
TCGA-S6-A8JX	TGCT	WHITE
TCGA-MA-AA41	CESC	NA/UK
TCGA-C5-A8XH	CESC	WHITE
TCGA-2X-A9D6	TGCT	WHITE
TCGA-ER-A19L	SKCM	WHITE
TCGA-QQ-A8VF	SARC	WHITE
TCGA-62-A46U	LUAD	WHITE
TCGA-78-7150	LUAD	WHITE
TCGA-04-1651	OV	WHITE
TCGA-3H-AB3U	MESO	WHITE
TCGA-2G-AALQ	TGCT	NA/UK
TCGA-B0-5099	KIRC	WHITE
TCGA-CU-A5W6	BLCA	WHITE
TCGA-AA-3678	COADREAD	NA/UK
TCGA-EB-A42Z	SKCM	ASIAN
TCGA-S9-A6TS	LGG	WHITE
TCGA-CJ-6033	KIRC	WHITE
TCGA-L5-A8NI	ESCA	WHITE
TCGA-06-0221	GBM	WHITE
TCGA-Z2-AA3S	SKCM	WHITE
TCGA-B3-3925	KIRP	WHITE
TCGA-CH-5740	PRAD	WHITE
TCGA-90-7767	LUSC	WHITE
TCGA-BQ-5891	KIRP	WHITE
TCGA-BW-A5NP	LIHC	NA/UK
TCGA-JW-A5VL	CESC	AMERICAN INDIAN OR ALASKA NATIVE
TCGA-44-A479	LUAD	BLACK OR AFRICAN AMERICAN
TCGA-BR-8360	STAD	WHITE
TCGA-78-7154	LUAD	WHITE
TCGA-UZ-A9PK	KIRP	NA/UK
TCGA-B5-A0K4	UCEC	NA/UK
TCGA-LN-A4A4	ESCA	ASIAN
TCGA-67-4679	LUAD	WHITE
TCGA-80-5611	LUAD	NA/UK
TCGA-JL-A3YW	BRCA	ASIAN
TCGA-IB-AAUM	PAAD	WHITE
TCGA-B0-5107	KIRC	WHITE
TCGA-AR-A1AR	BRCA	WHITE
TCGA-AA-3511	COADREAD	NA/UK
TCGA-EO-A3AS	UCEC	NA/UK
TCGA-C5-A1M8	CESC	WHITE
TCGA-AA-3710	COADREAD	NA/UK
TCGA-KO-8417	KICH	WHITE
TCGA-43-5668	LUSC	WHITE
TCGA-04-1346	OV	WHITE
TCGA-IN-7808	STAD	WHITE
TCGA-VP-A879	PRAD	NA/UK
TCGA-55-7914	LUAD	WHITE
TCGA-D1-A16J	UCEC	WHITE
TCGA-15-1446	GBM	WHITE
TCGA-EA-A43B	CESC	WHITE
TCGA-BR-8487	STAD	WHITE
TCGA-EW-A1J3	BRCA	WHITE
TCGA-VN-A88N	PRAD	NA/UK
TCGA-55-8510	LUAD	WHITE
TCGA-85-6561	LUSC	WHITE
TCGA-3B-A9HX	SARC	WHITE
TCGA-IB-7893	PAAD	WHITE
TCGA-B0-5108	KIRC	WHITE
TCGA-EE-A2GT	SKCM	WHITE
TCGA-VQ-A8DV	STAD	WHITE
TCGA-AQ-A04J	BRCA	WHITE
TCGA-UF-A7JA	HNSC	WHITE
TCGA-D8-A1JE	BRCA	WHITE
TCGA-4Z-AA7Y	BLCA	WHITE
TCGA-MP-A4T2	LUAD	WHITE
TCGA-FX-A3TO	SARC	WHITE
TCGA-B8-4619	KIRC	WHITE
TCGA-B0-5092	KIRC	WHITE
TCGA-KK-A8IC	PRAD	NA/UK
TCGA-NF-A5CP	UCS	WHITE
TCGA-E7-A6MF	BLCA	ASIAN
TCGA-L4-A4E5	LUAD	WHITE
TCGA-3M-AB46	STAD	NA/UK
TCGA-GM-A3XN	BRCA	WHITE
TCGA-CJ-4905	KIRC	WHITE
TCGA-D3-A3CE	SKCM	WHITE
TCGA-A3-3385	KIRC	WHITE
TCGA-CH-5772	PRAD	WHITE
TCGA-2G-AAKL	TGCT	WHITE
TCGA-SX-A7SS	KIRP	WHITE
TCGA-49-4514	LUAD	WHITE
TCGA-CV-6933	HNSC	WHITE
TCGA-53-7624	LUAD	WHITE
TCGA-MT-A51X	HNSC	WHITE
TCGA-FF-8047	DLBL	ASIAN
TCGA-HC-7749	PRAD	WHITE
TCGA-98-8020	LUSC	BLACK OR AFRICAN AMERICAN
TCGA-E2-A1BC	BRCA	NA/UK
TCGA-OR-A5JV	ACC	WHITE
TCGA-DD-A4NH	LIHC	NA/UK
TCGA-OR-A5K5	ACC	WHITE
TCGA-BQ-5888	KIRP	WHITE
TCGA-EL-A3T2	THCA	WHITE
TCGA-14-0787	GBM	ASIAN
TCGA-G2-AA3F	BLCA	WHITE
TCGA-50-5931	LUAD	WHITE
TCGA-QH-A6XA	LGG	WHITE
TCGA-69-7974	LUAD	WHITE
TCGA-CV-5443	HNSC	BLACK OR AFRICAN AMERICAN
TCGA-19-5951	GBM	WHITE
TCGA-76-4929	GBM	WHITE
TCGA-A1-A0SM	BRCA	WHITE
TCGA-CA-5255	COADREAD	ASIAN
TCGA-S4-A8RO	PAAD	WHITE
TCGA-A2-A0T0	BRCA	WHITE
TCGA-L5-A88Z	ESCA	WHITE
TCGA-CQ-A4CI	HNSC	WHITE
TCGA-86-8075	LUAD	WHITE
TCGA-FC-A66V	PRAD	NA/UK
TCGA-FR-A3YO	SKCM	WHITE
TCGA-2G-AAFH	TGCT	WHITE
TCGA-28-1747	GBM	WHITE
TCGA-CM-6172	COADREAD	WHITE
TCGA-QR-A70R	PCPG	WHITE
TCGA-56-8629	LUSC	WHITE
TCGA-V4-A9EC	UVM	NA/UK
TCGA-BP-5189	KIRC	WHITE
TCGA-VD-A8KE	UVM	NA/UK
TCGA-B6-A0I6	BRCA	BLACK OR AFRICAN AMERICAN
TCGA-YB-A89D	PAAD	WHITE
TCGA-EE-A2MN	SKCM	WHITE
TCGA-K4-A83P	BLCA	WHITE
TCGA-FY-A4B3	THCA	WHITE
TCGA-BR-6565	STAD	WHITE
TCGA-S5-A6DX	BLCA	WHITE
TCGA-55-7284	LUAD	WHITE
TCGA-E2-A2P6	BRCA	NA/UK
TCGA-CV-7104	HNSC	WHITE
TCGA-GM-A3XL	BRCA	BLACK OR AFRICAN AMERICAN
TCGA-60-2715	LUSC	WHITE
TCGA-CN-5359	HNSC	WHITE
TCGA-39-5019	LUSC	WHITE
TCGA-HR-A2OH	SKCM	NA/UK
TCGA-S7-A7WV	PCPG	WHITE
TCGA-BH-A0E1	BRCA	WHITE
TCGA-66-2780	LUSC	NA/UK
TCGA-B5-A11G	UCEC	BLACK OR AFRICAN AMERICAN
TCGA-KO-8415	KICH	WHITE
TCGA-MZ-A7D7	HNSC	WHITE
TCGA-B5-A1MZ	UCEC	WHITE
TCGA-KN-8437	KICH	WHITE
TCGA-FS-A1ZF	SKCM	WHITE
TCGA-FG-7638	LGG	WHITE
TCGA-75-6207	LUAD	NA/UK
TCGA-DD-A113	LIHC	WHITE
TCGA-G9-6348	PRAD	WHITE
TCGA-AZ-6601	COADREAD	WHITE
TCGA-VQ-AA6G	STAD	WHITE
TCGA-EJ-7793	PRAD	WHITE
TCGA-J8-A4HY	THCA	WHITE
TCGA-EA-A3HT	CESC	WHITE
TCGA-VR-AA4D	ESCA	WHITE
TCGA-EM-A3FL	THCA	NA/UK
TCGA-B5-A1MV	UCEC	WHITE
TCGA-DU-6393	LGG	WHITE
TCGA-EL-A3GR	THCA	WHITE
TCGA-4W-AA9S	GBM	BLACK OR AFRICAN AMERICAN
TCGA-H5-A2HR	UCEC	BLACK OR AFRICAN AMERICAN
TCGA-HT-8563	LGG	WHITE
TCGA-A2-A4RX	BRCA	BLACK OR AFRICAN AMERICAN
TCGA-NC-A5HI	LUSC	WHITE
TCGA-19-5950	GBM	WHITE
TCGA-BT-A3PH	BLCA	WHITE
TCGA-BR-6803	STAD	WHITE
TCGA-C8-A3M8	BRCA	ASIAN
TCGA-29-1770	OV	WHITE
TCGA-50-5932	LUAD	WHITE
TCGA-32-1977	GBM	WHITE
TCGA-DK-AA6U	BLCA	NA/UK
TCGA-19-5958	GBM	WHITE
TCGA-17-Z057	LUAD	NA/UK
TCGA-02-0055	GBM	WHITE
TCGA-E3-A3E5	THCA	WHITE
TCGA-41-5651	GBM	BLACK OR AFRICAN AMERICAN
TCGA-OR-A5KS	ACC	WHITE
TCGA-AP-A0LL	UCEC	WHITE
TCGA-DX-A8BX	SARC	WHITE
TCGA-AX-A1C5	UCEC	WHITE
TCGA-FY-A40N	THCA	WHITE
TCGA-23-1116	OV	WHITE
TCGA-MZ-A6I9	HNSC	WHITE
TCGA-BH-A18L	BRCA	WHITE
TCGA-D5-6532	COADREAD	WHITE
TCGA-EJ-A46H	PRAD	NA/UK
TCGA-D3-A2JE	SKCM	NA/UK
TCGA-G9-6332	PRAD	WHITE
TCGA-OE-A75W	PAAD	WHITE
TCGA-D1-A16Q	UCEC	WHITE
TCGA-56-7579	LUSC	WHITE
TCGA-FR-A726	SKCM	WHITE
TCGA-HU-A4HD	STAD	ASIAN
TCGA-FL-A1YG	UCEC	NA/UK
TCGA-D7-A4Z0	STAD	WHITE
TCGA-CI-6623	COADREAD	WHITE
TCGA-XF-A8HE	BLCA	WHITE
TCGA-FL-A1YH	UCEC	NA/UK
TCGA-RD-A8N5	STAD	WHITE
TCGA-WC-AA9E	UVM	WHITE
TCGA-C5-A1BE	CESC	WHITE
TCGA-WZ-A7V3	TGCT	NA/UK
TCGA-C5-A902	CESC	BLACK OR AFRICAN AMERICAN
TCGA-09-1664	OV	WHITE
TCGA-AC-A6IX	BRCA	WHITE
TCGA-06-0173	GBM	WHITE
TCGA-E2-A15I	BRCA	WHITE
TCGA-FZ-5919	PAAD	NA/UK
TCGA-GN-A263	SKCM	WHITE
TCGA-RA-A741	CESC	WHITE
TCGA-CG-4455	STAD	NA/UK
TCGA-2G-AAGN	TGCT	WHITE
TCGA-A3-3387	KIRC	WHITE
TCGA-21-5784	LUSC	WHITE
TCGA-FY-A3R6	THCA	WHITE
TCGA-WE-A8ZR	SKCM	WHITE
TCGA-61-2111	OV	WHITE
TCGA-21-1076	LUSC	WHITE
TCGA-30-1859	OV	WHITE
TCGA-D3-A3ML	SKCM	WHITE
TCGA-L5-A88V	ESCA	WHITE
TCGA-AX-A2H8	UCEC	WHITE
TCGA-CR-7392	HNSC	WHITE
TCGA-AP-A0LD	UCEC	WHITE
TCGA-HC-A6AO	PRAD	NA/UK
TCGA-D8-A1Y2	BRCA	WHITE
TCGA-AA-A01S	COADREAD	NA/UK
TCGA-OR-A5JP	ACC	WHITE
TCGA-KL-8331	KICH	WHITE
TCGA-BR-8373	STAD	WHITE
TCGA-QF-A5YS	UCEC	BLACK OR AFRICAN AMERICAN
TCGA-EM-A3O8	THCA	NA/UK
TCGA-DD-A11A	LIHC	BLACK OR AFRICAN AMERICAN
TCGA-FS-A1Z7	SKCM	WHITE
TCGA-UF-A7JD	HNSC	NA/UK
TCGA-AN-A0AR	BRCA	WHITE
TCGA-E2-A576	BRCA	BLACK OR AFRICAN AMERICAN
TCGA-BH-A1FU	BRCA	WHITE
TCGA-B0-5120	KIRC	WHITE
TCGA-RW-A67V	PCPG	WHITE
TCGA-12-3648	GBM	WHITE
TCGA-24-1430	OV	WHITE
TCGA-52-7812	LUSC	WHITE
TCGA-29-1784	OV	WHITE
TCGA-B7-A5TN	STAD	NA/UK
TCGA-73-4670	LUAD	WHITE
TCGA-P5-A5EU	LGG	WHITE
TCGA-D6-A4ZB	HNSC	WHITE
TCGA-DD-AACV	LIHC	NA/UK
TCGA-HT-7481	LGG	WHITE
TCGA-BH-A0B9	BRCA	WHITE
TCGA-OL-A5DA	BRCA	WHITE
TCGA-IB-8126	PAAD	WHITE
TCGA-VQ-A8PM	STAD	WHITE
TCGA-DE-A69K	THCA	BLACK OR AFRICAN AMERICAN
TCGA-BA-A6DG	HNSC	WHITE
TCGA-S9-A7QX	LGG	WHITE
TCGA-S7-A7WT	PCPG	WHITE
TCGA-AQ-A04L	BRCA	WHITE
TCGA-BR-8368	STAD	WHITE
TCGA-B0-5110	KIRC	WHITE
TCGA-DY-A1DF	COADREAD	WHITE
TCGA-AY-6386	COADREAD	BLACK OR AFRICAN AMERICAN
TCGA-BA-A4IF	HNSC	WHITE
TCGA-BH-A209	BRCA	BLACK OR AFRICAN AMERICAN
TCGA-EB-A4IQ	SKCM	ASIAN
TCGA-Y8-A8S0	KIRP	WHITE
TCGA-E7-A97Q	BLCA	WHITE
TCGA-QT-A5XJ	PCPG	BLACK OR AFRICAN AMERICAN
TCGA-CV-A6K1	HNSC	WHITE
TCGA-12-5299	GBM	WHITE
TCGA-HT-7620	LGG	WHITE
TCGA-BR-4294	STAD	WHITE
TCGA-CS-6670	LGG	WHITE
TCGA-A6-A567	COADREAD	BLACK OR AFRICAN AMERICAN
TCGA-C5-A1MK	CESC	WHITE
TCGA-XY-A89B	TGCT	WHITE
TCGA-BF-AAP4	SKCM	NA/UK
TCGA-06-1087	GBM	WHITE
TCGA-AB-2876	LAML	WHITE
TCGA-OL-A6VR	BRCA	BLACK OR AFRICAN AMERICAN
TCGA-DB-5278	LGG	WHITE
TCGA-KT-A7W1	LGG	WHITE
TCGA-FD-A3B4	BLCA	BLACK OR AFRICAN AMERICAN
TCGA-A8-A09B	BRCA	NA/UK
TCGA-XF-A9SX	BLCA	WHITE
TCGA-EV-5902	KIRP	WHITE
[truncated: 8,045 more rows]
