# Supplementary material for: Systematic discovery of germline cancer predisposition genes through the identification of somatic second hits
Source: Nat Commun. 2018 Jul 4;9:2601. doi: 10.1038/s41467-018-04900-7 (PMC6031629; doi:10.1038/s41467-018-04900-7)
Supplement: Supplementary file 4 — Supplementary Data 2 [file 41467_2018_4900_MOESM4_ESM.xlsx]

## Sheet: Sheet1
Supplementary Data 2. Frequencies (%) of putative LOH events (AIs) and RDGVs in all samples (pan-cancer and for each of the 17 cancer types separately).
Gene	Locus	AI_Pan	AI_BLCA	AI_BRCA	AI_CESC	AI_COADREAD	AI_GBM	AI_HNSC	AI_KIRC	AI_LGG	AI_LIHC	AI_LUAD	AI_LUSC	AI_OV	AI_PRAD	AI_SKCM	AI_STAD	AI_THCA	AI_UCEC	RDGV_Pan	RDGV_BLCA	RDGV_BRCA	RDGV_CESC	RDGV_COADREAD	RDGV_GBM	RDGV_HNSC	RDGV_KIRC	RDGV_LGG	RDGV_LIHC	RDGV_LUAD	RDGV_LUSC	RDGV_OV	RDGV_PRAD	RDGV_SKCM	RDGV_STAD	RDGV_THCA	RDGV_UCEC
ACAP3	1p36.33	8.75	8.44	9.91	11.26	7.89	6.36	7.41	3.2	11.28	10.27	7.08	12.27	9.51	2.24	7.66	8.39	0.8	8.1	0.01	0	0	0	0	0	0.19	0	0	0	0	0	0	0	0	0	0	0
ACTRT2	1p36.32	6.05	4.96	5.93	7.95	4.73	3.05	4.18	4	8.37	9.97	6.02	9.26	6.59	1.22	7.66	5.22	0.4	3.58	0.27	0.25	0.39	0	0.2	0	0.57	0.27	0	0	0.89	0	0	0.41	0	0	0.4	0.56
AGRN	1p36.33	13.61	10.42	14.09	16.23	9.66	7.12	13.5	6.67	20.43	16.62	14.51	23.54	13.17	2.85	17.45	14.51	2.62	11.3	0.15	0.25	0	0.33	0	0	0.57	0.27	0	0	0	0.2	0.24	0.2	0.43	0	0	0.56
ATAD3A	1p36.33	10.32	8.44	12.34	10.6	6.11	9.16	9.51	5.87	11.67	15.71	6.02	14.89	14.63	2.24	10.43	12.47	1.81	9.42	0.34	0.25	0.49	0.99	0	1.02	0.38	0	0.19	0.6	0.35	0.4	0.24	0.41	0.64	0.23	0	0
ATAD3B	1p36.33	6.11	4.22	9.04	9.6	4.73	2.8	4.18	3.47	7.78	9.37	6.37	8.25	6.34	0.41	6.38	7.71	0.8	4.71	0.51	0.74	0.68	0	0.39	0.51	0.57	0.27	0.19	0	0.35	0.6	1.71	0.61	0.85	0.45	0.4	0.19
AURKAIP1	1p36.33	8.26	6.45	9.43	8.94	7.69	6.62	6.08	3.47	10.12	11.78	6.02	12.68	12.2	1.22	6.17	9.3	1.41	7.53	0.03	0	0.1	0	0	0	0	0	0.19	0	0	0	0	0.2	0	0	0	0
C1orf159	1p36.33	7.7	5.46	8.26	10.6	5.92	4.33	7.41	2.93	11.48	8.76	8.5	14.29	5.37	1.42	8.94	7.94	2.21	6.59	0	0	0	0	0	0	0	0	0	0	0	0	0	0	0	0	0	0
C1orf86	1p36.33	4.79	3.72	8.07	3.64	3.94	2.54	3.99	2.4	6.81	4.53	2.3	7.44	6.1	1.22	3.83	5.9	0.2	6.4	0.01	0	0.1	0	0	0	0	0	0	0	0	0	0	0	0	0	0	0
CALML6	1p36.33	7.72	6.95	8.07	9.6	4.73	3.05	6.46	2.93	10.89	14.2	6.02	13.08	6.83	0.61	10.43	7.03	0.4	7.16	0.1	0.5	0	0	0	0.25	0.19	0.53	0.19	0	0	0.2	0	0	0	0	0	0.19
CCNL2	1p36.33	7.84	6.45	8.55	8.28	6.9	6.36	6.08	3.47	10.31	10.27	5.84	12.27	11.95	1.02	6.38	8.84	1.21	6.78	0.01	0	0	0	0	0	0	0	0	0	0	0	0	0	0	0.23	0	0
CPSF3L	1p36.33	7.55	7.2	7.58	9.27	6.31	5.85	6.84	2.93	10.31	9.97	5.66	11.47	6.1	2.03	6.38	7.48	0.8	6.59	0.16	0	0.1	0.33	0	0	0.19	0.53	0.58	0	0	0.6	0	0	0.21	0.23	0.2	0
DVL1	1p36.33	9.07	7.94	9.62	10.6	8.48	8.14	7.79	4.27	12.06	12.39	6.55	13.28	9.02	2.44	7.66	8.84	1.21	7.53	0.01	0	0	0	0	0	0	0	0	0	0	0	0	0.2	0	0	0	0
GABRD	1p36.33	14.47	11.17	13.12	19.54	8.68	10.69	14.07	8	20.43	24.17	12.21	22.33	18.29	1.22	16.81	15.87	2.62	14.5	0.06	0.25	0.1	0	0	0	0.38	0	0	0	0	0	0	0.2	0	0	0	0
GNB1	1p36.33	2.08	1.24	3.01	2.98	1.38	1.27	1.9	0.8	2.33	2.42	1.77	3.02	4.63	0	1.7	1.59	0.8	2.45	0	0	0	0	0	0	0	0	0	0	0	0	0	0	0	0	0	0
ISG15	1p36.33	13.49	11.41	13.9	16.23	8.88	7.63	12.93	6.93	19.84	16.92	13.81	23.34	13.66	2.64	15.96	14.29	1.01	10.55	0.03	0	0.1	0	0	0	0	0	0	0.3	0	0	0	0.2	0	0	0	0
KLHL17	1p36.33	14.15	12.41	14.58	13.25	8.88	8.4	13.31	6.4	21.21	22.36	11.15	22.74	11.71	2.85	14.26	17.46	2.01	9.98	0.16	0	0.19	0	0.2	0	0	0	0	0	0.18	0.2	0	0	0	0.23	0.4	0.19
MORN1	1p36.33	0.81	0.25	1.26	1.66	0.39	0.51	0.57	0.27	1.36	0.6	0.35	1.81	1.71	0.41	0.64	0.23	0.2	0.75	0.11	0	0.1	0.33	0.2	0	0.19	0.27	0	0	0	0.2	0	0	0.43	0.23	0.2	0
MRPL20	1p36.33	7.66	6.2	8.36	8.28	6.71	6.36	5.89	3.47	9.92	10.27	5.66	12.27	11.95	1.02	6.17	8.84	1.21	6.21	0.07	0	0	0	0	0.25	0	0.27	0	0	0	0	0	0	0.21	0	0.2	0
MXRA8	1p36.33	11.44	11.17	12.15	13.25	9.86	10.43	9.13	5.07	14.98	14.2	9.03	18.11	13.66	2.64	9.36	12.47	2.01	10.36	0.05	0	0	0.33	0	0	0.19	0	0	0	0.18	0	0	0	0	0	0	0
NADK	1p36.33	15.19	11.17	16.62	17.55	13.21	9.92	14.26	6.13	17.9	22.66	12.04	23.54	24.63	2.85	16.17	14.51	3.42	11.68	0	0	0	0	0	0	0	0	0	0	0	0	0	0	0	0	0	0
NOC2L	1p36.33	14.15	12.41	14.58	13.25	8.88	8.4	13.31	6.4	21.21	22.36	11.15	22.74	11.71	2.85	14.26	17.46	2.01	9.98	0.11	0.25	0.1	0	0	0.25	0	0	0.19	0	0	0.2	0.49	0	0	0	0.2	0.56
PANK4	1p36.32	15.6	14.14	16.42	16.56	12.62	9.41	15.02	9.33	21.21	22.66	14.51	25.96	14.39	4.47	16.38	19.27	3.22	10.73	0.39	0.99	0.29	0	0.79	0.25	0.38	0.27	0	0	0.71	0.6	0.73	0.2	0.21	0.45	0.2	0.56
PEX10	1p36.32	5.48	3.72	5.73	7.95	2.76	2.29	4.18	1.6	7.98	7.55	3.19	11.27	6.1	1.42	7.02	5.22	0.4	4.9	0.08	0	0.1	0	0	0.25	0	0	0	0.91	0	0	0.24	0.41	0	0	0	0
PLEKHN1	1p36.33	16.97	13.4	17.1	16.89	10.85	10.18	15.4	8.53	25.29	24.47	14.16	28.77	16.59	3.25	19.15	20.41	2.21	11.49	0.03	0	0	0	0	0	0.19	0.27	0	0	0	0	0	0	0.21	0	0	0
PRKCZ	1p36.33	11.07	9.68	13.12	13.91	7.69	8.4	10.27	5.6	14.4	13.29	8.5	16.1	16.59	1.63	10	12.47	1.81	12.05	0.1	0	0.19	0	0	0	0	0.27	0.39	0	0	0.2	0	0	0	0.23	0	0.19
PUSL1	1p36.33	8.08	7.69	9.14	10.6	6.9	5.85	6.84	2.93	10.51	9.97	5.66	12.27	7.56	2.03	6.81	7.48	0.8	7.34	0.07	0.25	0.1	0	0	0	0	0	0	0	0.18	0.2	0	0	0	0	0.2	0.19
SAMD11	1p36.33	14.12	12.41	14.58	13.25	8.68	8.4	13.12	6.4	21.21	22.36	11.15	22.74	11.71	2.85	14.26	17.23	2.01	9.98	0.01	0	0	0	0.2	0	0	0	0	0	0	0	0	0	0	0	0	0
SDF4	1p36.33	10.14	7.69	11.27	12.25	8.88	5.34	8.17	6.93	12.65	14.8	9.38	12.47	11.46	1.42	11.28	13.15	2.41	10.92	0.05	0	0.19	0.33	0	0	0	0	0	0	0	0	0.24	0	0	0	0	0
SKI	1p36.33	0.55	0.25	0.78	1.32	0.2	0.51	0.57	0.53	0.78	0.3	0.35	1.01	0.49	0.2	0.21	0.68	0	0.56	0.22	0	0.19	1.32	0	0.51	0	0.27	0.19	0.3	0.18	0.4	0	0.41	0.43	0.45	0	0.19
SLC35E2	1p36.33	14.14	10.67	14.58	16.89	12.23	9.16	13.12	5.87	16.73	21.75	10.8	22.33	22.2	2.85	15.32	14.29	2.62	10.73	0	0	0	0	0	0	0	0	0	0	0	0	0	0	0	0	0	0
SSU72	1p36.33	10.32	8.44	12.34	10.6	6.11	9.16	9.51	5.87	11.67	15.71	6.02	14.89	14.63	2.24	10.43	12.47	1.81	9.42	0	0	0	0	0	0	0	0	0	0	0	0	0	0	0	0	0	0
TAS1R3	1p36.33	7.82	7.2	7.97	9.27	6.31	7.12	6.84	2.93	10.51	9.97	5.84	12.07	7.07	2.03	6.38	7.71	0.8	6.97	0.4	0.74	0.29	0	0.59	0.25	0.38	0.27	0.58	0	0.18	0.2	0.24	1.22	0.21	0.91	0.4	0.75
TMEM52	1p36.33	7.72	6.95	8.07	9.6	4.73	3.05	6.46	2.93	10.89	14.2	6.02	13.08	6.83	0.61	10.43	7.03	0.4	7.16	0.01	0	0	0	0	0	0	0	0	0	0	0	0.24	0	0	0	0	0
TNFRSF14	1p36.32	14.6	12.9	14.77	14.9	12.23	8.91	14.45	8	20.62	22.05	13.27	24.75	14.39	3.66	15.74	16.78	1.81	10.36	0.08	0	0.1	0	0.2	0	0.19	0	0	0.3	0	0.2	0	0	0	0.23	0.4	0
TNFRSF18	1p36.33	8.89	6.45	9.33	11.26	7.3	4.58	7.03	6.13	11.28	14.2	7.79	11.07	8.54	1.22	10	12.02	2.21	9.98	0.02	0	0	0	0	0	0	0	0	0	0	0	0	0	0.21	0	0	0
TTLL10	1p36.33	8.13	5.96	8.36	10.26	6.71	3.82	6.46	5.6	9.92	13.6	6.9	9.66	8.54	1.02	8.94	9.98	1.81	9.6	0.04	0	0	0	0	0	0	0.53	0	0	0	0	0	0	0.21	0	0.2	0
UBE2J2	1p36.33	11.59	10.92	11.47	14.24	10.06	6.87	10.65	5.87	16.54	15.41	8.67	16.5	11.22	2.64	12.34	14.74	1.81	9.79	0	0	0	0	0	0	0	0	0	0	0	0	0	0	0	0	0	0
VWA1	1p36.33	8.8	6.2	12.15	10.93	7.5	5.6	6.08	3.73	11.67	12.39	6.9	13.68	10.73	1.22	7.23	12.24	1.41	8.1	0.12	0.25	0.1	0.33	0	0.25	0	0	0.58	0	0	0	0	0.2	0.21	0	0.2	0
ARHGEF16	1p36.32	4.8	4.96	6.32	7.95	3.94	2.8	4.94	4	8.17	10.27	5.49	6.04	2.93	0	3.19	4.54	0.2	4.33	0.18	0.25	0	0	0.2	0	0	0.27	0.39	0.91	0.35	0	0	0.2	0.21	0.23	0.2	0.19
TPRG1L	1p36.32	5.85	3.97	3.89	3.97	3.16	4.83	6.08	3.73	10.31	5.74	6.02	12.27	11.95	0.81	7.45	6.58	0	2.45	0.03	0	0	0	0	0	0	0.27	0	0	0	0	0	0	0	0.23	0	0
TP73	1p36.32	9.4	8.19	9.14	10.26	6.31	4.58	9.51	5.33	14.59	15.41	6.37	15.9	5.61	1.42	9.36	12.24	1.01	6.4	0.3	0.25	0.19	0	0.39	0.51	0.57	0	0.19	0.91	0.35	0.4	0	0.2	0.21	0.68	0.4	0.56
CCDC27	1p36.32	19.09	16.63	21.77	23.84	13.81	17.05	16.73	11.2	25.49	26.89	15.22	31.39	26.1	3.86	20.43	19.95	2.62	14.5	0.07	0	0.1	0	0	0	0.38	0	0	0	0	0	0.24	0	0	0.23	0	0
LRRC47	1p36.32	15.58	12.41	18.66	20.86	10.85	14.76	12.93	8.8	20.04	20.54	12.57	25.96	24.88	3.25	16.6	16.33	1.81	12.43	0.04	0	0.1	0	0	0	0	0.27	0	0	0.18	0	0	0	0	0	0.2	0
DFFB	1p36.32	16.87	14.64	18.66	18.54	14.79	17.56	15.97	7.47	20.62	23.26	16.46	25.75	30.24	3.05	16.38	17.69	1.81	11.68	0.03	0.25	0	0	0	0	0	0.27	0	0	0	0	0	0.2	0	0	0	0
C1orf174	1p36.32	16.87	14.64	18.66	18.54	14.79	17.56	15.97	7.47	20.62	23.26	16.46	25.75	30.24	3.05	16.38	17.69	1.81	11.68	0.08	0	0	0.33	0.2	0	0	0	0.39	0	0	0.2	0	0	0	0.23	0	0
AJAP1	1p36.32	9.42	6.45	10.59	12.91	5.33	10.18	6.46	4.53	13.42	12.69	6.73	13.68	19.51	1.22	10.85	7.94	1.21	7.16	0	0	0	0	0	0	0	0	0	0	0	0	0	0	0	0	0	0
KCNAB2	1p36.31	8.44	6.7	8.55	9.27	6.71	11.2	6.84	4.8	13.04	12.39	6.55	12.27	13.66	1.83	10.43	5.67	0.4	7.72	0	0	0	0	0	0	0	0	0	0	0	0	0	0	0	0	0	0
CHD5	1p36.31	27.06	24.81	29.45	24.17	21.3	31.81	23	18.4	34.24	36.56	25.66	40.64	41.22	9.55	30.21	26.3	7.65	19.21	0.74	1.24	0.87	0.33	0.39	0.51	0.38	0.53	0.39	1.21	1.42	1.21	0	0.81	0.85	1.13	0.6	0.56
RPL22	1p36.31	23.49	19.6	26.53	23.51	19.13	26.97	19.58	13.33	30.74	30.82	21.24	33.8	39.76	5.69	25.11	23.13	3.62	18.64	0.01	0	0	0	0	0	0	0	0	0	0	0	0	0	0	0	0	0
RNF207	1p36.31	18.57	16.38	21.19	21.52	16.57	20.1	14.07	10.13	25.49	26.28	14.69	24.95	34.88	3.86	18.94	18.37	2.21	15.63	0.04	0	0	0	0	0	0	0.53	0.19	0	0	0	0	0	0	0	0	0
ICMT	1p36.31	18.27	16.13	20.7	21.19	15.98	20.1	13.88	10.13	24.9	25.68	14.16	24.55	34.39	3.86	18.72	18.14	2.21	15.25	0.01	0	0	0	0	0	0	0	0	0	0	0.2	0	0	0	0	0	0
GPR153	1p36.31	14.65	12.9	14.97	15.89	11.64	16.54	12.36	6.13	22.18	19.64	10.8	22.33	26.34	2.85	15.32	13.15	1.41	12.99	0.01	0	0	0	0	0	0	0	0	0	0	0.2	0	0	0	0	0	0
ACOT7	1p36.31	4.73	2.98	4.47	4.3	4.73	6.36	4.75	2.93	7.2	4.53	3.36	7.65	8.54	1.02	3.83	2.95	0.4	6.03	0	0	0	0	0	0	0	0	0	0	0	0	0	0	0	0	0	0
ESPN	1p36.31	7.54	7.94	10.3	5.96	5.92	9.16	6.65	3.73	9.14	8.16	5.84	11.47	10.24	1.63	7.66	6.58	1.01	7.72	0.15	0.25	0.19	0.33	0.39	0	0	0	0.19	0	0	0.4	0	0.2	0	0.23	0	0.38
PLEKHG5	1p36.31	12.05	10.92	15.35	10.26	10.45	12.72	10.27	5.33	16.15	16.31	9.2	17.3	19.27	2.85	12.77	11.11	1.21	9.98	0.09	0	0	0	0	0	0.19	0	0	0	0.18	0.2	0.24	0	0.21	0	0.4	0.19
TNFRSF25	1p36.31	7.6	7.94	10.4	5.96	5.92	9.16	6.65	3.73	9.14	8.16	6.02	11.87	10.24	1.63	7.66	6.58	1.01	7.72	0.07	0	0.1	0	0	0	0	0	0.39	0	0	0.2	0	0	0	0	0.2	0
NOL9	1p36.31	13.92	9.43	15.55	13.91	13.61	13.74	11.41	6.13	20.82	19.03	10.97	19.92	27.32	2.85	12.77	12.93	1.01	9.79	0.01	0.25	0	0	0	0	0	0	0	0	0	0	0	0	0	0	0	0
TAS1R1	1p36.31	14.76	10.42	16.72	14.9	13.81	15.78	11.79	7.47	21.6	19.34	11.86	21.33	28.05	3.05	13.83	14.29	1.01	10.36	0.71	0.99	0.78	0.33	0.59	1.27	0.76	1.07	0.58	0.6	0.53	0.6	0.73	0.2	1.06	1.13	0	0.94
ZBTB48	1p36.31	12.67	8.44	14.58	11.26	12.82	13.49	10.46	6.4	17.9	15.11	9.73	19.11	24.88	1.83	10.21	12.24	1.01	9.79	0.02	0	0	0	0	0	0	0	0	0.3	0	0	0	0	0	0	0.2	0
KLHL21	1p36.31	19.62	14.64	21.67	17.55	19.13	22.65	16.54	9.07	26.46	24.77	16.46	28.37	37.32	3.86	17.23	19.73	1.61	14.12	0.02	0	0	0	0	0.25	0	0	0	0	0.18	0	0	0	0	0	0	0
PHF13	1p36.31	18.76	14.64	20.99	16.89	17.75	22.14	15.4	9.07	25.29	24.17	15.4	26.96	34.88	3.66	16.81	18.59	1.41	13.75	0	0	0	0	0	0	0	0	0	0	0	0	0	0	0	0	0	0
THAP3	1p36.31	13.91	9.93	15.84	13.91	13.41	18.07	11.6	6.67	19.26	16.62	10.44	19.92	23.66	2.85	14.04	13.61	0.6	9.98	0.28	0	0.29	0.99	0.59	1.27	0.19	0.53	0	0	0.18	0.2	0	0.41	0	0	0.2	0.19
DNAJC11	1p36.31	11.97	8.44	13.61	12.91	12.62	14.76	10.27	5.07	15.95	14.5	9.2	15.69	20.98	2.44	11.49	12.24	0.6	8.85	0	0	0	0	0	0	0	0	0	0	0	0	0	0	0	0	0	0
CAMTA1	1p36.31	21.78	16.13	24.1	21.85	17.36	22.65	17.87	10.67	29.57	30.21	17.52	33.2	43.41	3.05	23.83	19.73	2.01	16.01	0.08	0	0	0.33	0.2	0.25	0	0.27	0	0	0	0	0	0.2	0	0	0.4	0
VAMP3	1p36.23	20.08	16.63	20.89	17.55	16.77	21.88	16.92	11.73	27.43	26.28	15.93	29.98	37.56	5.69	20	23.58	2.62	15.63	0.01	0	0	0	0	0	0	0	0	0	0	0.2	0	0	0	0	0	0
PER3	1p36.23	25.22	22.83	26.43	19.87	22.88	28.24	20.72	15.47	35.8	29.91	20.71	36.82	43.66	6.71	28.51	27.21	3.62	19.96	0.11	0	0.19	0	0	0.25	0.38	0	0.19	0	0.18	0.2	0	0.2	0	0.23	0.2	0
UTS2	1p36.23	23.1	20.84	24.49	18.21	20.51	25.7	19.01	13.87	34.05	27.49	19.29	33.2	40.49	4.88	27.02	21.54	3.02	18.27	0.05	0	0.1	0	0	0	0.19	0	0	0	0.18	0	0.24	0	0	0	0	0
TNFRSF9	1p36.23	3.87	2.48	5.05	2.98	3.35	4.83	3.8	2.93	4.47	5.44	3.19	3.22	8.54	1.22	2.77	2.95	0.8	4.52	0.16	0	0.1	0.33	0.2	0	0	0	0.19	0	0	0.4	0	0.41	0.64	0.23	0	0.19
PARK7	1p36.23	4.41	2.73	5.83	3.64	3.94	5.34	4.37	3.73	4.67	5.74	3.36	3.62	8.05	1.22	2.98	4.31	0.8	5.08	0.16	0	0.29	0.33	0	0	0.38	0.27	0.19	0	0.35	0.4	0.24	0	0	0.23	0.2	0.19
ERRFI1	1p36.23	3.11	1.74	4.28	3.31	2.96	3.05	2.85	3.2	2.92	5.44	2.48	2.21	5.12	0.81	0.85	3.17	0.8	2.82	0.15	0	0.29	0.66	0	0.25	0	0	0	0	0	0	0.49	0	0.21	0	0.2	0.19
SLC45A1	1p36.23	14.82	14.14	14.77	12.58	11.83	15.52	16.35	9.87	21.98	16.62	13.45	20.93	21.71	4.27	13.4	13.83	1.81	10.92	0.42	0.25	0.1	0	0.39	0	0.19	0	0.39	0.3	0.71	0.8	1.46	0.41	0.21	0.68	0.4	0.56
RERE	1p36.23	8.59	7.69	9.52	8.94	6.71	8.4	8.75	5.87	14.01	7.55	7.08	12.07	11.71	2.24	7.02	7.94	1.41	4.71	0.03	0	0	0	0	0	0	0	0	0	0	0.2	0	0	0	0	0.2	0.19
ENO1	1p36.23	7.88	6.45	9.14	6.29	8.88	6.36	7.79	4.27	12.06	7.85	5.49	13.88	14.39	1.22	6.17	7.48	0	6.21	0.06	0.5	0.1	0	0	0	0	0	0.19	0	0	0.2	0	0	0	0.23	0	0
CA6	1p36.23	17.67	14.64	20.8	14.9	14.99	18.32	16.16	9.33	21.4	25.38	13.98	23.94	32.93	5.89	17.87	14.06	3.02	15.25	0.06	0	0	0	0	0	0	0	0	0	0	0	0	0.41	0	0	0.2	0.19
SLC2A7	1p36.23	9.83	7.2	13.02	7.95	9.07	10.18	6.27	5.33	11.09	17.82	7.26	12.07	22.93	1.02	8.09	7.26	0.2	8.47	0.44	0.25	0.49	0.33	0.39	0	0.95	1.6	0.39	0	0.18	0.6	0.73	0.61	0.21	0.23	0.2	0.75
SLC2A5	1p36.23	1.71	1.99	1.55	2.65	0.99	1.53	1.14	1.33	1.95	3.02	1.24	2.41	3.9	0	1.06	2.04	0.2	0.94	0.28	0.5	0.1	0.99	0.2	0.51	0.38	0.27	0.39	0.3	0	0.4	0.49	0.2	0.21	0.68	0.4	0
GPR157	1p36.23	5.74	4.47	5.54	5.96	5.13	6.62	5.13	3.73	7.78	8.46	5.84	9.66	12.68	0.81	4.47	6.12	0.4	3.95	0.02	0	0	0	0	0	0	0	0	0	0	0	0	0.2	0	0	0	0
H6PD	1p36.22	13.45	11.66	13.51	12.25	11.05	16.29	13.5	5.6	17.12	17.82	10.62	22.13	26.1	2.85	12.55	12.47	0.8	9.42	1.14	1.24	1.36	1.99	0.99	1.78	0.57	0.53	1.17	1.21	1.24	1.81	0	1.42	0.64	0.91	1.21	1.51
SPSB1	1p36.22	8.69	5.46	8.65	8.94	6.51	5.85	8.56	5.33	13.04	11.48	7.08	14.89	16.1	2.44	8.09	8.16	0.6	5.27	0	0	0	0	0	0	0	0	0	0	0	0	0	0	0	0	0	0
SLC25A33	1p36.22	4.75	4.47	5.83	3.31	2.96	4.58	6.27	2.67	4.67	5.14	2.12	8.05	7.07	1.22	5.11	4.76	0.4	5.08	0.05	0	0	0	0	0	0	0	0	0	0.18	0	0.24	0	0	0.23	0	0
TMEM201	1p36.22	4.75	4.47	5.83	3.31	2.96	4.58	6.27	2.67	4.67	5.14	2.12	8.05	7.07	1.22	5.11	4.76	0.4	5.08	0	0	0	0	0	0	0	0	0	0	0	0	0	0	0	0	0	0
PIK3CD	1p36.22	10.51	9.93	11.76	10.93	8.09	6.87	10.27	5.33	13.62	13.29	9.56	17.1	15.37	2.64	8.3	9.07	1.01	7.72	0.06	0	0.1	0	0.2	0	0	0.27	0	0	0	0	0	0	0	0	0	0.19
CLSTN1	1p36.22	7.07	7.2	8.94	8.61	6.71	5.09	7.22	5.6	8.95	11.18	4.42	7.65	13.9	2.24	5.32	6.8	0.8	6.21	0.14	0.5	0.29	0.33	0.2	0.25	0	0	0	0.3	0	0	0	0.2	0	0	0.2	0.19
CTNNBIP1	1p36.22	0.16	0	0.49	0.33	0	0.51	0.19	0	0.19	0	0.18	0.2	0	0.2	0	0	0	0.19	0.02	0	0	0	0	0	0	0	0	0	0	0.2	0	0	0	0.23	0	0
LZIC	1p36.22	1.95	1.49	2.62	3.31	1.38	1.78	0.76	1.87	2.14	4.83	1.77	1.61	2.93	0.41	1.28	1.59	0	2.07	0	0	0	0	0	0	0	0	0	0	0	0	0	0	0	0	0	0
NMNAT1	1p36.22	2.04	1.49	2.92	3.31	1.38	1.78	0.95	1.87	2.14	4.83	1.77	2.01	2.93	0.41	1.28	2.04	0	2.07	0.4	0.74	0.49	0.66	0	0.25	0	0.53	0.58	0.3	0.53	0.4	0	0.2	0.43	0.91	0.6	0.56
RBP7	1p36.22	0.95	0.25	1.36	0.33	0	0.51	1.14	0.53	1.36	1.51	0.71	1.41	1.22	0	0.64	0.91	0	0.75	0.01	0	0	0	0	0	0	0	0	0	0	0	0	0.2	0	0	0	0
UBE4B	1p36.22	11.44	10.92	13.31	7.95	12.43	10.94	9.89	5.6	12.84	15.41	9.38	15.49	24.39	1.22	9.36	12.7	0.6	10.17	0.01	0	0	0	0	0	0	0	0	0	0.18	0	0	0	0	0	0	0
KIF1B	1p36.22	20.06	18.11	24.59	15.89	20.71	18.83	18.63	9.6	22.57	26.89	17.52	27.77	38.78	5.69	18.3	22	4.43	14.69	0.73	0.74	0.87	0.99	0.79	0.51	0.38	0	1.36	0	0.71	1.01	0.98	1.63	0.21	0.23	0.6	0.94
PGD	1p36.22	16.32	17.37	19.63	15.23	13.81	16.79	14.64	8.8	19.07	22.36	14.87	23.74	31.46	3.86	16.38	17.23	1.81	11.3	0.07	0	0.19	0	0	0	0.19	0	0	0	0	0.2	0	0.2	0.21	0	0	0
DFFA	1p36.22	14.09	12.16	15.16	11.59	12.43	14.76	11.79	7.2	19.46	16.92	10.44	21.13	30.49	3.05	16.38	13.83	0.6	8.29	0.04	0	0.19	0	0	0	0	0	0	0	0	0	0.24	0	0	0	0.2	0
PEX14	1p36.22	10.63	8.93	11.66	8.61	9.47	8.91	10.84	5.87	14.2	11.78	6.73	16.9	19.51	1.83	11.28	10.43	0.8	8.47	0	0	0	0	0	0	0	0	0	0	0	0	0	0	0	0	0	0
CASZ1	1p36.22	11.65	10.92	12.73	10.26	8.88	9.16	11.98	6.67	14.59	12.08	9.56	17.91	19.02	3.46	13.83	11.11	1.61	8.29	0	0	0	0	0	0	0	0	0	0	0	0	0	0	0	0	0	0
TARDBP	1p36.22	11.32	8.44	13.7	10.93	11.83	7.12	10.65	7.2	15.18	16.31	7.79	16.7	20.73	3.66	10.21	10.2	1.41	9.6	0.07	0	0	0	0.2	0.25	0.19	0.27	0	0	0.18	0	0	0.2	0	0	0	0
MASP2	1p36.22	15.1	10.67	18.08	12.91	18.54	15.27	13.12	10.4	17.7	20.85	10.8	22.13	25.85	5.08	13.62	13.83	3.02	15.82	0.48	0	0.58	0	0.2	0.25	0.95	0.27	0.39	0.6	0	0.2	1.71	0.61	1.06	0.68	0	0.38
SRM	1p36.22	15.47	11.17	18.85	12.91	18.93	16.03	13.31	10.13	18.29	21.75	11.33	21.93	26.59	5.28	14.04	14.51	3.02	16.2	0.03	0	0	0	0	0	0.19	0	0.19	0	0	0	0	0	0.21	0	0	0
EXOSC10	1p36.22	17.17	13.9	20.8	14.24	21.7	16.03	13.88	11.2	20.82	21.15	13.81	23.54	30.73	5.28	17.23	16.1	3.42	17.89	0.1	0	0	0	0.39	0	0	0	0.19	0	0	0.2	0.24	0.2	0.21	0	0.2	0.19
MTOR	1p36.22	14.56	12.16	18.95	13.91	14.4	10.69	12.74	7.2	19.46	16.01	12.92	20.93	30.49	3.46	14.04	15.19	2.01	13.18	0.13	0	0.39	0	0	0.25	0	0	0.19	0	0.18	0	0	0	0.21	0.23	0	0
ANGPTL7	1p36.22	1.37	0.99	2.72	1.66	0.99	1.02	0.76	1.07	2.14	3.32	0.71	1.21	3.41	0.41	0.21	0.68	0.2	1.13	0.28	0.25	0.19	0	0.2	0	0.76	0	0.19	0.91	0.53	0	0.24	0.61	0.21	0.23	0.6	0.38
UBIAD1	1p36.22	6.53	3.23	8.84	5.63	6.11	3.82	5.32	1.87	7.78	9.67	5.66	8.45	15.85	1.42	6.81	6.12	0.2	7.16	0.29	0	0.39	0	0.59	0	0.38	0.27	0	0	0	0.4	0.49	0.41	0	0.23	0.4	0.75
FBXO2	1p36.22	11.76	7.94	14.48	10.26	9.07	8.91	8.37	7.47	15.76	16.92	9.38	18.91	13.66	3.46	11.06	11.79	1.41	10.36	0.01	0	0	0	0	0	0	0	0	0	0	0	0	0	0	0	0	0
FBXO44	1p36.22	11.76	7.94	14.48	10.26	9.07	8.91	8.37	7.47	15.76	16.92	9.38	18.91	13.66	3.46	11.06	11.79	1.41	10.36	0.06	0	0	0	0	0	0	0	0.19	0	0.18	0	0	0	0	0.23	0.4	0
FBXO6	1p36.22	11.76	7.94	14.48	10.26	9.07	8.91	8.37	7.47	15.76	16.92	9.38	18.91	13.66	3.46	11.06	11.79	1.41	10.36	0.04	0	0	0	0	0	0	0	0.19	0.3	0	0	0	0	0.21	0	0	0
MAD2L2	1p36.22	11.76	7.94	14.48	10.26	9.07	8.91	8.37	7.47	15.76	16.92	9.38	18.91	13.66	3.46	11.06	11.79	1.41	10.36	0.02	0	0.1	0	0	0	0	0	0	0	0	0	0	0	0	0.23	0	0
AGTRAP	1p36.22	7.76	6.95	9.04	8.28	6.31	5.6	7.22	4.53	9.14	10.27	5.84	11.27	14.39	1.42	7.02	6.35	1.01	6.21	0.04	0	0.1	0	0	0	0	0	0	0	0	0.2	0.24	0	0	0	0	0.19
MTHFR	1p36.22	20.65	17.87	25.07	22.19	19.72	14.5	17.49	12	26.07	24.17	15.75	32.39	44.39	4.47	19.36	17.46	2.21	16.57	0.41	0	0.58	1.66	0.59	0.25	0.38	0	0.19	0.6	0.53	0.4	0	0.41	0.43	0.68	0.4	0.38
CLCN6	1p36.22	21.09	17.87	25.46	22.85	20.12	15.52	18.06	11.47	26.46	25.38	16.64	33.6	46.1	3.86	20	17.46	2.21	16.76	0.96	0.74	0.97	0.99	0.39	1.53	0.76	0.8	0.78	0.3	0.89	1.21	0.98	0.81	0.43	0.91	1.21	1.69
NPPA	1p36.22	12.78	11.41	14.97	15.56	12.03	8.4	11.6	7.73	16.34	13.9	10.09	21.93	24.63	2.24	10.21	11.34	1.01	11.49	0.02	0.25	0	0	0	0	0	0	0	0	0	0	0	0	0	0	0	0
NPPB	1p36.22	11.02	9.93	12.44	13.91	10.85	6.87	9.89	6.67	14.59	12.08	8.85	18.11	20.73	2.03	8.94	11.11	0.6	9.04	0	0	0	0	0	0	0	0	0	0	0	0	0	0	0	0	0	0
KIAA2013	1p36.22	11.62	6.7	13.99	9.93	11.64	6.62	10.46	8.27	13.81	19.03	8.5	16.7	24.63	2.64	12.13	9.75	0.8	9.42	0	0	0	0	0	0	0	0	0	0	0	0	0	0	0	0	0	0
PLOD1	1p36.22	14.96	11.41	18.37	14.57	15.19	8.91	13.88	10.13	15.76	21.75	11.86	22.13	30.73	3.66	14.47	12.47	1.41	12.62	0.66	0.74	0.49	0.66	0	0.76	0.76	0.27	1.75	0.6	0.53	1.01	0.98	0.61	0.64	0.68	0.6	0
MFN2	1p36.22	17.1	14.39	20.41	17.88	16.57	11.45	15.4	11.73	18.29	25.08	13.45	25.35	33.17	5.08	15.53	14.97	2.01	14.31	0.5	0.25	0.58	0.66	0.39	0.25	0.57	0.8	0.39	0.6	0.89	0.2	0.24	0.41	0.21	0.23	0.6	0.75
MIIP	1p36.22	10.43	9.93	13.61	12.58	8.88	5.6	9.51	5.87	10.31	15.11	7.96	15.09	19.27	2.85	7.66	8.84	1.41	8.66	0.04	0	0.1	0	0.2	0	0	0	0	0	0	0	0	0	0	0.23	0	0
TNFRSF8	1p36.22	11.41	7.2	13.31	11.92	11.64	10.43	13.31	6.93	16.15	13.6	10.09	17.3	21.22	2.85	11.06	11.11	1.61	8.29	0.09	0	0.1	0	0	0	0	0.27	0.19	0	0.35	0.4	0.24	0	0	0	0.2	0
TNFRSF1B	1p36.22	7.48	8.68	9.43	8.28	7.1	5.09	6.65	4	7.98	8.46	6.02	11.67	13.17	2.64	6.38	8.16	1.01	5.65	0.12	0.25	0	0	0	0	0	0.27	0.19	0	0.18	0.4	0	0	0.43	0.45	0	0.19
VPS13D	1p36.22	14.76	13.15	18.08	14.9	14.2	12.21	10.84	7.47	20.04	14.8	12.04	21.33	28.05	3.25	16.6	14.51	0.2	12.81	0.31	0.5	0.29	0.33	0	0.76	0	0.27	0.97	0	0	0.8	0.49	0	0.43	0	0.2	0.75
DHRS3	1p36.22	10.26	7.94	11.47	9.93	8.28	10.18	10.46	4.53	13.04	13.6	9.2	17.3	21.71	1.83	8.72	9.07	1.21	8.47	0.25	0.74	0.29	0	0.2	0.51	0.38	0	0.19	0.6	0.35	0.4	0.24	0.2	0	0	0.2	0.56
AADACL4	1p36.21	3.16	1.24	3.79	3.64	2.76	4.07	1.71	1.87	4.28	2.42	3.01	4.23	7.56	0.61	2.55	2.27	0.2	4.14	0.07	0	0	0	0	0	0.19	0	0.39	0	0	0	0	0	0.21	0	0	0
C1orf158	1p36.21	9.54	6.95	11.66	10.6	9.27	6.11	7.03	4.27	12.26	15.11	7.61	11.87	16.83	1.42	9.79	8.84	0.8	8.29	0.15	0.25	0.1	0	0.39	0.51	0	0	0	0	0.18	0.2	0.49	0	0	0.23	0	0
PRAMEF1	1p36.21	9.54	6.95	11.66	10.6	9.27	6.11	7.03	4.27	12.26	15.11	7.61	11.87	16.83	1.42	9.79	8.84	0.8	8.29	0.04	0	0.1	0	0.2	0	0	0	0	0	0	0.2	0	0	0	0	0	0
PRAMEF2	1p36.21	10.2	9.93	14.67	10.26	11.05	10.18	9.7	7.73	9.53	9.67	11.5	14.08	14.88	3.66	11.06	9.75	1.21	6.59	0.04	0	0	0	0.39	0	0	0	0	0	0	0.2	0	0	0.21	0	0	0
PRAMEF4	1p36.21	3.92	2.23	4.96	3.31	2.96	3.31	3.23	2.93	4.47	5.14	3.01	5.03	5.12	1.02	4.68	3.85	0.6	3.58	0.02	0	0	0	0	0	0	0	0	0.3	0	0	0	0	0	0	0	0
PDPN	1p36.21	2.55	1.74	3.11	2.32	2.37	1.78	2.85	1.6	3.89	2.11	1.77	3.02	5.12	0.41	2.55	2.49	0	1.32	0.04	0	0	0	0	0	0	0	0.19	0	0	0.2	0.24	0	0	0	0.2	0
PRDM2	1p36.21	16.43	16.38	17.78	15.56	14.2	9.92	13.31	8	20.43	19.34	17.17	27.36	32.93	3.25	19.15	18.37	2.21	10.92	0.05	0	0.1	0	0.39	0	0	0	0.19	0	0	0	0	0	0	0	0.2	0
TMEM51	1p36.21	8.15	5.71	7.39	7.95	7.1	5.09	7.98	3.47	12.26	9.37	6.37	14.49	18.54	1.02	8.72	7.71	0.2	6.03	0	0	0	0	0	0	0	0	0	0	0	0	0	0	0	0	0	0
EFHD2	1p36.21	16.93	12.9	21.28	13.58	16.77	15.78	15.4	8.53	19.46	16.31	14.34	26.16	34.39	3.25	15.32	16.1	2.62	14.31	0	0	0	0	0	0	0	0	0	0	0	0	0	0	0	0	0	0
CTRC	1p36.21	23.02	19.35	26.92	22.19	22.09	21.88	19.58	12	26.07	24.17	19.65	34.41	45.85	4.47	22.77	23.58	2.82	17.51	0.29	0	0.29	0	0.2	0.25	0.76	0	0.39	0	0.53	0.6	0.24	0.41	0	0.68	0	0.19
CELA2A	1p36.21	20.26	15.38	24.39	16.56	18.34	17.3	18.44	10.13	24.51	20.54	18.05	30.78	42.68	4.27	20.21	20.63	2.82	17.14	0.48	0.25	0.58	0.99	0.2	0.51	0.38	0	0.39	0.6	0.35	0	0.49	0.61	0.43	1.13	0.6	0.94
CELA2B	1p36.21	21.49	17.62	24.98	21.85	18.93	19.59	18.63	12	25.49	21.75	18.58	33.2	42.2	4.06	21.91	22.68	2.41	18.08	0.27	0.25	0.1	0.33	0.39	0.76	0.38	0.27	0.58	0	0.18	0	0	0.41	0	0	0.2	0.19
CASP9	1p36.21	23.08	19.35	28.09	23.84	20.91	21.12	20.72	12	26.07	23.57	20.53	34.81	45.85	5.08	25.53	23.13	1.81	18.64	0.08	0	0	0.33	0	0	0	0.27	0	0.3	0.18	0.2	0	0.2	0	0	0	0
DNAJC16	1p36.21	19.79	19.35	25.17	20.86	15.19	16.03	19.2	9.33	22.18	21.15	18.58	29.38	36.34	5.08	22.77	19.27	3.02	16.57	0.14	0.74	0.19	0	0	0.25	0	0	0	0	0	0	0.49	0	0.21	0.68	0	0.19
AGMAT	1p36.21	17.1	14.89	21.19	17.88	13.41	13.49	15.78	8.53	19.84	19.94	14.16	25.55	30.73	4.67	19.57	16.33	3.02	13.56	0.57	1.49	0.68	1.32	0.99	0.51	0.38	0.27	0.39	0	0.53	0.2	0.24	0.41	0.85	0.91	0.8	0.56
DDI2	1p36.21	8.11	6.95	11.47	9.93	7.3	7.63	7.41	6.67	8.95	8.46	6.55	11.27	14.88	1.63	8.51	5.22	0.2	5.27	0	0	0	0	0	0	0	0	0	0	0	0	0	0	0	0	0	0
RSC1A1	1p36.21	8.11	6.95	11.47	9.93	7.3	7.63	7.41	6.67	8.95	8.46	6.55	11.27	14.88	1.63	8.51	5.22	0.2	5.27	0.08	0	0.1	0	0.2	0.25	0	0.27	0	0	0	0.2	0	0	0.21	0	0	0.19
FBLIM1	1p36.21	14.23	9.68	12.54	13.58	13.61	10.69	13.88	7.47	20.43	12.99	9.73	24.14	26.1	4.27	16.38	13.83	0.6	14.5	0.18	0.25	0.19	0.66	0.39	0	0	0	0.19	0.3	0	0.2	0.24	0	0.43	0	0	0.19
SLC25A34	1p36.21	14.23	9.68	12.54	13.58	13.61	10.69	13.88	7.47	20.43	12.99	9.73	24.14	26.1	4.27	16.38	13.83	0.6	14.5	0.31	0.5	0.49	0.33	0.2	0.76	0.19	0.27	0.39	0	0.53	0.4	0	0	0.21	0.23	0.4	0.38
TMEM82	1p36.21	14.23	9.68	12.54	13.58	13.61	10.69	13.88	7.47	20.43	12.99	9.73	24.14	26.1	4.27	16.38	13.83	0.6	14.5	0	0	0	0	0	0	0	0	0	0	0	0	0	0	0	0	0	0
SPEN	1p36.21	16.25	16.38	20.21	15.56	15.38	14.76	15.4	9.6	20.82	16.01	15.93	21.33	34.88	3.86	17.23	16.1	0.6	12.99	0.04	0	0.1	0	0	0	0	0	0.19	0	0	0	0	0.2	0.21	0	0	0
ZBTB17	1p36.13	17.58	17.37	22.35	16.56	16.96	16.03	16.73	10.93	21.98	16.92	17.35	22.74	38.05	4.06	17.66	16.55	0.6	14.88	0.04	0	0.19	0	0	0	0.19	0	0	0	0	0	0	0	0	0	0	0
C1orf64	1p36.13	25.56	23.08	29.93	24.83	23.67	17.56	25.48	18.13	30.54	24.77	25.13	40.85	37.56	8.33	28.09	24.26	5.63	21.66	0.01	0	0	0	0	0	0	0	0	0	0	0	0	0	0	0	0	0
HSPB7	1p36.13	26.73	23.33	31.78	26.82	24.85	18.32	26.05	18.67	31.32	25.68	26.02	42.05	38.54	8.54	30	25.4	5.83	23.73	0.13	0.25	0.1	0.33	0	0	0.19	0	0.78	0.6	0	0	0	0	0.21	0	0.4	0
CLCNKA	1p36.13	17.97	18.11	21.09	17.88	14	12.72	20.15	12.53	20.43	19.34	19.29	29.58	24.63	4.88	18.72	17.91	2.62	13.94	0.46	1.24	0.19	0.33	0.39	0.76	0.38	0.27	0.19	0.91	0.89	0.6	0	0.2	0.43	0.45	0.8	0.56
CLCNKB	1p36.13	22.05	18.86	26.92	23.18	19.72	13.49	21.1	14.93	27.24	17.82	20	35.81	31.46	5.28	25.32	19.95	5.23	20.15	0.97	1.24	0.97	0.66	1.58	0.25	0.57	1.07	1.36	0.6	1.24	0.8	1.95	0.81	0.43	0.91	1.41	0.94
EPHA2	1p36.13	13.71	10.92	15.45	13.91	11.44	10.43	11.6	9.87	18.68	9.97	12.57	24.35	22.44	2.64	14.26	15.65	2.82	11.11	0.09	0.25	0.19	0.66	0.2	0	0.19	0	0	0	0	0	0	0.2	0	0	0	0.19
ARHGEF19	1p36.13	14.55	15.14	18.37	14.57	13.61	9.16	14.45	8.27	17.7	12.69	12.74	22.94	23.9	4.47	13.62	15.42	3.62	10.92	0.04	0.25	0.1	0	0	0.25	0	0	0	0	0	0	0	0	0	0.23	0	0
FBXO42	1p36.13	12.28	10.92	14.77	10.6	11.05	9.67	10.84	5.87	18.29	11.48	7.61	19.11	23.9	3.05	10.43	11.56	1.61	11.3	0.02	0	0	0	0.2	0	0	0	0	0	0	0	0	0	0	0	0	0.19
SPATA21	1p36.13	16.66	13.9	19.92	15.23	15.78	12.98	15.97	8.53	21.79	14.5	13.81	28.17	35.61	3.46	17.87	15.42	2.82	13.18	0.04	0	0	0	0	0	0.19	0	0.19	0	0.18	0	0	0	0	0	0	0
NECAP2	1p36.13	14.9	12.16	17.78	12.91	14.6	10.69	13.88	7.47	19.07	12.08	11.86	26.16	33.41	2.85	16.38	14.29	2.41	12.05	0.05	0	0	0	0.2	0	0	0	0	0.3	0.18	0	0	0	0	0.23	0	0.19
ATP13A2	1p36.13	19.1	19.35	21.19	19.87	18.54	15.52	17.11	11.2	23.93	19.64	16.11	31.39	34.63	6.71	21.49	16.33	2.21	15.44	0.63	0.5	0.78	0.99	0.99	0.51	0.38	0.27	1.36	0	1.06	0	0.24	0.41	0.64	0.45	0.4	0.75
CROCC	1p36.13	17.27	17.37	19.34	16.56	16.17	13.23	15.78	10.93	21.79	18.73	15.4	28.17	30.98	5.69	19.36	14.29	1.61	14.31	0.11	0	0.19	0	0.39	0	0.38	0	0	0.6	0	0	0.24	0	0	0	0	0
MFAP2	1p36.13	17.83	18.11	20.21	17.55	17.16	13.74	16.16	10.67	22.57	19.34	15.22	29.38	31.95	5.89	20.21	15.65	2.01	14.5	0.04	0	0	0	0	0.25	0	0	0	0	0	0	0	0	0	0.23	0	0.19
SDHB	1p36.13	23.82	24.32	27.89	23.84	27.02	20.1	18.44	13.33	28.21	24.77	20	36.42	45.85	8.13	23.4	23.58	3.02	19.59	0.49	0.25	0.19	0	0.39	0.25	0	0.53	0.58	0.91	0.89	0.4	0.49	0.41	0.21	0.45	0.8	0.75
PADI2	1p36.13	23.18	22.58	28.09	23.18	27.42	19.34	18.82	11.73	27.63	22.96	20.89	35.21	40.24	7.52	22.13	22	4.43	19.02	0.1	0.25	0.1	0	0	0	0	0.27	0.19	0	0	0	0.24	0.41	0	0	0.2	0
PADI1	1p36.13	18.34	14.14	23.13	19.87	16.96	15.27	16.54	12	21.4	20.85	14.34	27.97	32.44	4.27	17.66	15.19	3.22	13.94	0.14	0	0.1	0	0	0	0.19	0.27	0.19	0.3	0.18	0.2	0	0.2	0.21	0.23	0	0.19
PADI3	1p36.13	15.61	12.66	17.49	14.57	15.98	10.69	13.5	8.53	22.18	16.92	13.27	22.74	30.98	4.27	15.32	13.83	1.21	14.88	0.05	0	0.1	0	0.2	0	0	0.27	0	0	0	0.2	0	0	0	0	0	0
PADI4	1p36.13	20.59	19.11	26.63	21.85	19.92	16.79	16.73	15.2	23.15	19.03	19.11	27.57	39.27	7.11	20.21	21.09	4.63	16.2	0.08	0.25	0	0	0.79	0	0	0	0	0.3	0	0	0	0	0.21	0	0	0.19
RCC2	1p36.13	11.6	9.68	12.44	11.59	14	5.34	8.37	6.13	15.37	17.52	9.73	15.29	23.66	3.46	8.94	12.47	2.62	9.6	0.12	0	0	0	0	0	0.19	0.27	0	0	0	0	0	0.2	0.21	0.23	0.2	0.38
ARHGEF10L	1p36.13	16.17	12.16	17.59	15.89	12.43	11.96	14.83	8	20.82	23.57	13.98	25.15	26.1	5.69	17.45	18.14	1.61	13.75	0.01	0	0	0	0	0.25	0	0	0	0	0	0	0	0	0	0	0	0
ACTL8	1p36.13	10.35	7.44	13.02	10.6	9.47	5.85	8.17	6.13	14.2	12.39	8.32	15.9	19.76	3.86	8.51	11.34	1.21	6.97	0.19	0.5	0	0	0.2	0	0	0	0.19	0.3	0	0.2	0	0.61	0.21	0.23	0.2	0.38
IGSF21	1p36.13	9.97	7.44	12.63	9.93	8.88	5.6	9.13	6.13	13.81	15.41	7.43	14.49	20.73	2.64	9.15	7.71	0.6	7.72	0.02	0.25	0	0	0	0	0	0	0	0	0	0	0	0	0	0	0	0
KLHDC7A	1p36.13	10.14	7.69	11.37	7.95	8.68	5.85	10.65	5.6	13.42	12.69	8.5	17.3	19.51	2.44	9.79	12.47	0.8	9.04	0.04	0	0.1	0	0.2	0	0	0	0	0	0	0	0.24	0.2	0	0	0	0
PAX7	1p36.13	1.87	1.74	2.04	2.32	1.97	1.53	1.33	0.53	2.92	3.32	1.06	2.41	2.68	0	0.85	2.49	0.2	2.07	0.49	0.25	0.29	0.33	0.59	0	0.38	0.27	0.58	0.6	0.35	0.6	0.73	1.02	0.21	0.91	0.8	0.94
TAS1R2	1p36.13	25.3	26.3	28.67	24.5	24.65	18.32	21.48	15.2	30.35	28.7	24.42	37.42	47.56	6.1	29.79	25.85	4.43	19.77	0.95	0.5	0.87	0.66	0.59	0.51	1.14	0.8	0.58	1.21	1.06	1.21	1.46	1.02	0.85	0.68	1.41	0.75
ALDH4A1	1p36.13	25.3	26.3	28.67	24.5	24.65	18.32	21.48	15.2	30.35	28.7	24.42	37.42	47.56	6.1	29.79	25.85	4.43	19.77	0.2	0.5	0.19	0.33	0	0	0.38	0.27	0	0.6	0.18	0	0.24	0.41	0.21	0	0	0.56
UBR4	1p36.13	26.01	27.54	31.68	27.48	24.26	19.85	25.1	16.53	29.96	28.1	23.72	38.43	46.34	8.13	27.23	25.85	4.02	24.67	0.15	0.25	0.39	0	0.2	0.25	0	0	0	0	0	0.4	0.24	0.2	0	0	0.4	0
MRTO4	1p36.13	20.29	17.37	25.36	21.52	20.51	16.79	16.54	11.2	23.15	20.54	15.04	33.4	44.15	4.47	18.94	18.14	2.62	17.33	0.09	0	0.1	0.33	0.39	0.25	0	0.27	0	0	0	0.4	0	0	0	0	0	0
AKR7A3	1p36.13	23.8	21.84	28.96	24.83	25.05	19.59	19.39	12.8	28.6	25.38	18.58	39.84	49.76	5.49	22.13	21.54	3.62	19.4	0.08	0	0.39	0.33	0	0.25	0	0.27	0	0	0	0.2	0	0	0	0	0	0
AKR7A2	1p36.13	21.74	19.35	26.34	22.85	23.27	17.56	17.68	11.2	27.04	23.26	16.28	36.42	47.07	4.67	21.28	19.05	2.62	17.51	0.04	0	0	0	0	0	0	0	0	0	0	0.2	0.24	0	0.21	0	0	0.19
PQLC2	1p36.13	19.39	17.37	23.42	21.19	20.91	15.27	15.4	9.87	24.9	21.45	15.04	33	40.98	3.86	17.45	16.78	2.62	16.2	0.17	0.5	0	0	0	0	0	0	0.19	0.3	0.18	0.2	0.24	0.61	0.21	0.23	0.2	0.38
HTR6	1p36.13	12.95	12.41	13.61	10.93	14.2	7.38	10.84	7.2	17.12	17.52	10.97	17.51	26.59	2.24	10.21	15.87	1.41	10.17	0.01	0	0	0	0	0	0	0	0	0	0	0	0	0	0	0	0	0
TMCO4	1p36.13	18.33	16.63	21.57	17.55	16.96	12.72	15.02	8.8	25.29	23.57	16.46	24.14	36.59	3.66	16.81	19.27	1.81	14.69	0.24	0	0.29	0	0.39	0.51	0.38	0.27	0.39	0.6	0	0	0.24	0.41	0	0	0.6	0.19
RNF186	1p36.13	6.86	4.22	8.75	6.62	4.14	5.34	5.51	2.67	10.51	9.67	5.66	9.05	15.61	1.22	7.87	5.44	0	7.34	0.01	0	0	0	0	0	0	0	0	0	0	0	0	0.2	0	0	0	0
PLA2G2E	1p36.13	2.64	1.49	3.79	2.65	2.56	1.53	2.09	1.33	4.47	3.32	1.95	3.02	6.1	0.81	3.19	1.59	0.2	2.64	0.05	0.25	0	0	0.2	0	0	0	0	0	0	0	0	0	0	0.23	0	0
PLA2G2A	1p36.13	9.09	8.68	10.79	9.27	9.86	5.34	6.46	3.47	14.4	6.95	6.73	14.69	19.51	3.46	11.28	8.16	1.01	6.21	0.03	0	0.1	0	0	0	0	0.27	0	0	0	0	0	0	0	0	0.2	0
PLA2G5	1p36.13	11.54	8.93	12.15	9.6	11.24	7.89	10.27	3.73	18.68	14.5	7.61	18.71	25.85	1.42	11.28	12.47	0	9.42	0.05	0	0	0	0	0	0	0	0.19	0	0.18	0	0	0.2	0	0	0.2	0
PLA2G2D	1p36.12	11.54	8.93	12.15	9.6	11.24	7.89	10.27	3.73	18.68	14.5	7.61	18.71	25.85	1.42	11.28	12.47	0	9.42	0.04	0	0.1	0	0	0	0	0.27	0.19	0	0	0	0	0	0	0	0	0.19
PLA2G2F	1p36.12	2.42	2.48	2.33	1.32	1.78	2.54	2.09	0.8	3.7	5.14	1.77	5.23	4.39	0	2.98	2.27	0.2	2.07	0.12	0	0.19	0	0	0.51	0	0.27	0.19	0	0.18	0	0	0.2	0.21	0	0.4	0
UBXN10	1p36.12	2.42	2.48	2.33	1.32	1.78	2.54	2.09	0.8	3.7	5.14	1.77	5.23	4.39	0	2.98	2.27	0.2	2.07	0.01	0	0	0	0	0	0	0	0	0	0	0	0	0	0	0	0	0.19
CAMK2N1	1p36.12	1.28	1.24	1.55	0.99	0.79	1.53	1.52	0.8	1.56	1.21	0.71	1.21	3.41	0.2	1.28	0.23	0.2	0.56	0	0	0	0	0	0	0	0	0	0	0	0	0	0	0	0	0	0
MUL1	1p36.12	1.28	1.24	1.55	0.99	0.79	1.53	1.52	0.8	1.56	1.21	0.71	1.21	3.41	0.2	1.28	0.23	0.2	0.56	0.06	0	0.1	0	0	0.51	0	0	0	0	0	0	0	0	0	0.45	0.2	0
CDA	1p36.12	17.2	15.38	20.02	19.21	14.6	10.18	14.26	9.33	23.35	21.15	13.98	25.55	37.07	4.06	19.57	17.23	1.61	11.86	0.01	0	0	0	0	0	0	0	0	0	0	0	0	0	0	0	0	0
PINK1	1p36.12	20.15	17.12	24.68	23.51	18.54	12.21	16.16	9.6	23.93	25.08	17.17	31.79	39.76	4.06	23.19	18.59	2.01	16.57	0.25	0	0.49	0	0	0.25	0.19	0.53	0	0	0.35	0.4	0.49	0.2	0.85	0.23	0.4	0.19
DDOST	1p36.12	23.69	20.6	28.09	26.82	22.49	16.29	19.2	11.73	29.18	29.61	19.82	35.61	45.37	4.67	25.96	23.13	2.82	19.59	0.25	0.25	0.39	0.99	0.2	0	0.57	0.53	0.39	0	0.18	0	0	0.2	0.21	0	0.2	0.38
KIF17	1p36.12	23.55	21.34	27.79	24.83	22.68	16.79	18.06	11.2	29.18	28.1	18.94	35.61	46.59	3.66	26.6	22	2.21	19.59	0.5	0.74	0.49	0	0.2	0.25	0.38	0.53	0.19	0.3	0.18	0.6	0.73	0.2	0.64	1.13	1.21	0.38
HP1BP3	1p36.12	11.56	8.93	12.34	11.26	11.24	10.18	6.65	5.87	15.95	14.8	9.2	16.7	25.37	2.85	11.91	10.2	0.8	9.79	0	0	0	0	0	0	0	0	0	0	0	0	0	0	0	0	0	0
EIF4G3	1p36.12	13.64	8.68	15.16	11.59	14	8.14	10.46	8	21.4	16.31	9.2	19.72	29.76	3.46	13.4	10.66	2.82	10.17	0.01	0	0	0	0	0	0	0	0	0	0.18	0	0	0	0	0	0	0
ECE1	1p36.12	12.25	9.93	12.83	13.25	12.43	9.92	10.08	8.53	16.15	12.39	10.27	21.93	26.34	2.64	11.91	12.7	1.61	7.72	0.41	0.25	0.39	0.66	0.79	0.25	0.38	0.53	0.19	0.3	0.35	0.4	0.49	0.41	0.21	0	0.4	0.38
NBPF3	1p36.12	14.53	10.67	16.91	12.58	16.77	10.43	10.84	11.47	20.43	15.71	11.68	22.33	26.34	3.25	14.04	12.93	2.41	13.56	0.25	0.25	0.19	0.99	0	0.25	0.57	0.27	0.39	0.3	0	0.2	0	0.2	0.43	0	0.4	0.38
ALPL	1p36.12	12.42	10.67	14.97	14.24	12.03	8.4	8.17	6.93	13.04	20.24	9.38	17.91	18.78	4.27	9.79	12.24	2.21	9.6	0.46	0.74	0.39	0.66	0.59	0.25	0.38	0.53	0.19	0.6	0.53	0.8	0	0.2	0	0.68	0.6	0.56
RAP1GAP	1p36.12	18.4	16.63	21.67	19.21	16.57	17.56	14.64	13.07	19.84	18.13	14.51	27.97	36.83	5.28	18.3	15.65	2.21	13.56	0.27	0	0.39	0.33	0.2	0	0.76	0.27	0	0.3	0.35	0.2	0.24	0.2	0	0	0.4	0.56
USP48	1p36.12	13.06	9.68	17.78	9.6	15.78	9.16	9.7	7.73	16.93	13.6	10.09	18.11	30	2.85	11.49	10.43	0.6	10.36	0.02	0	0	0	0	0	0	0	0	0	0	0	0	0	0	0	0.2	0.19
LDLRAD2	1p36.12	1.4	1.24	1.46	1.66	0.99	1.02	0.57	1.33	1.56	1.81	1.42	2.41	2.93	0	2.13	0.91	0	1.13	0.05	0	0	0	0	0	0.19	0	0	0	0.18	0	0	0	0	0.23	0	0
CDC42	1p36.12	1.38	0.5	1.55	1.99	0.99	1.27	0.76	1.07	1.36	0.6	1.06	1.81	5.37	0	1.06	0.45	0	2.26	0	0	0	0	0	0	0	0	0	0	0	0	0	0	0	0	0	0
CELA3A	1p36.12	11.05	8.68	12.24	8.61	10.65	9.67	10.65	5.07	14.59	13.6	5.66	16.5	21.46	2.03	11.7	12.02	2.21	10.92	0.36	0.5	0.19	0.33	0.2	0.51	0.19	0.27	0.58	0	0.35	0.6	0.49	0.2	0.21	0.23	0	0.56
CELA3B	1p36.12	8.64	7.44	12.24	7.28	6.51	6.11	6.08	5.07	9.53	12.69	7.61	13.28	17.32	1.83	9.15	9.3	1.61	7.91	0.28	0.25	0.19	0	0.2	0.25	0	0.53	0.58	0	0.18	0.2	0.24	0	0.43	0.45	1.01	0.19
WNT4	1p36.12	1.41	0.5	1.46	1.99	0.99	1.27	0.76	1.07	1.36	0.91	1.06	1.81	5.37	0	1.06	0.68	0	2.45	0.05	0	0.19	0	0	0	0	0	0	0	0	0	0.49	0	0	0	0	0
ZBTB40	1p36.12	16.88	13.65	20.8	16.56	14.99	13.99	13.69	11.47	20.82	20.54	15.22	24.14	33.66	4.67	18.3	17.46	1.61	11.68	0.16	0	0.1	0.33	0.2	0.25	0.76	0	0	0	0.18	0.2	0	0.41	0	0	0.2	0
EPHA8	1p36.12	11.07	10.42	12.34	11.92	10.85	6.62	11.03	6.93	16.34	12.99	8.14	17.3	19.51	1.22	11.06	10.43	0.2	9.79	0.15	0	0	0	0	0.25	0.38	0	0.19	0	0.18	0.2	0.24	0.41	0.21	0	0	0.19
C1QA	1p36.12	10.36	9.43	11.18	11.26	10.85	6.11	10.65	6.4	16.34	11.18	7.96	15.9	17.8	1.22	9.57	10.2	0.2	8.85	0.12	0	0	0.33	0.2	0	0	0.27	0.19	0	0	0.2	0.24	0	0	0.23	0	0.19
C1QC	1p36.12	9.27	8.44	10.01	9.93	9.07	5.34	9.89	5.87	14.79	11.18	7.61	14.29	15.37	1.02	8.72	8.84	0.2	7.53	0.04	0	0	0	0	0.25	0	0	0	0.3	0	0	0	0	0	0	0.2	0
C1QB	1p36.12	0.75	0.5	1.07	0	1.18	0.51	0.19	0.27	1.95	0.91	0.53	1.01	1.71	0	1.06	0.68	0	1.13	0.08	0.25	0.1	0	0	0	0	0	0	0	0	0	0	0.61	0.21	0	0	0
EPHB2	1p36.12	6.99	3.72	7.39	5.96	7.89	4.58	6.08	5.07	9.92	12.99	6.37	9.86	14.39	1.63	4.89	5.44	0.4	6.03	0.22	0	0.39	0.33	0	0.25	0	0.27	1.36	0.3	0.18	0.2	0.24	0.2	0	0	0.2	0.19
KDM1A	1p36.12	8.17	6.2	9.04	8.61	9.07	6.87	6.27	2.4	10.51	13.29	5.49	10.66	20	1.63	7.66	8.39	0.6	7.34	0.03	0	0	0	0	0.25	0	0	0.19	0	0	0	0.24	0	0	0	0	0
LUZP1	1p36.12	7.27	5.96	7.58	7.62	7.5	6.36	5.7	2.13	9.34	11.18	5.13	10.46	18.05	1.42	5.96	8.16	0.4	7.34	0.03	0	0	0	0	0	0.19	0	0	0	0.18	0	0	0	0	0	0	0.19
HTR1D	1p36.12	2.71	1.49	2.43	3.31	3.35	1.53	2.09	1.07	3.89	3.32	2.83	5.43	6.83	0	2.77	1.81	0	1.13	0.12	0.25	0	0	0	0.25	0.19	0	0	0.6	0	0.2	0	0	0	0.45	0.6	0
HNRNPR	1p36.12	7.52	5.46	7.19	6.62	7.69	2.54	5.32	3.2	9.92	11.48	5.31	11.27	18.54	1.42	7.87	7.26	0	6.03	0	0	0	0	0	0	0	0	0	0	0	0	0	0	0	0	0	0
ZNF436	1p36.12	6.9	5.21	5.93	5.3	6.71	2.54	4.75	3.2	9.73	10.88	5.13	10.66	17.07	1.22	6.81	6.8	0	4.52	0.06	0	0.1	0	0	0	0	0	0	0	0.18	0.2	0	0	0	0	0.4	0
ASAP3	1p36.12	3.25	1.99	4.18	2.65	3.75	2.8	3.42	1.07	4.47	2.72	2.3	4.43	7.56	0.41	1.28	3.85	0	4.52	0.08	0	0	0	0	0	0.19	0	0	0.6	0	0.4	0	0	0	0.45	0	0
E2F2	1p36.12	14.25	9.93	16.23	12.91	14.2	10.94	12.55	8	20.43	16.92	12.74	21.33	26.1	3.66	14.26	12.02	2.01	10.36	0.05	0	0	0	0	0	0.19	0.27	0	0	0	0	0	0	0	0	0.2	0.19
ID3	1p36.12	14.25	9.93	16.23	12.91	14.2	10.94	12.55	8	20.43	16.92	12.74	21.33	26.1	3.66	14.26	12.02	2.01	10.36	0.05	0	0.19	0	0	0	0.19	0	0	0	0	0.2	0	0.2	0	0	0	0
RPL11	1p36.11	1.45	0.99	2.62	1.32	1.58	1.78	0.57	1.07	1.17	0.3	0.53	2.82	3.41	0.2	1.06	0.91	0	1.69	0.02	0	0	0	0.2	0	0	0	0	0	0	0	0	0	0	0	0.2	0
TCEB3	1p36.11	11.01	8.19	11.66	7.62	11.05	8.14	8.56	5.87	15.76	16.01	8.32	17.1	26.59	1.83	10.85	10.88	0.8	7.34	0.03	0	0	0	0.2	0	0.19	0	0	0	0	0	0	0.2	0	0	0	0
GALE	1p36.11	12.89	9.68	13.41	10.26	13.41	10.18	9.51	6.67	18.48	18.13	9.91	19.92	30	2.64	12.55	12.24	1.01	7.91	0.47	0.99	0.87	0.66	0.59	0.51	0.19	0.27	0.58	0.3	0.71	0	0.24	0.81	0.64	0.45	0	0.56
HMGCL	1p36.11	8.98	6.7	10.79	8.61	8.48	6.87	6.46	4	12.65	13.29	5.66	13.88	19.27	2.03	9.15	6.8	0.2	6.03	0.22	0.25	0.19	0.33	0.2	0	0.19	0.53	0.19	0	0	0.4	0.24	0.41	0	0.23	0.4	0.19
LYPLA2	1p36.11	12.89	9.68	13.41	10.26	13.41	10.18	9.51	6.67	18.48	18.13	9.91	19.92	30	2.64	12.55	12.24	1.01	7.91	0.01	0	0	0	0	0	0	0	0	0	0	0	0	0	0	0	0	0.19
FUCA1	1p36.11	17.13	18.36	18.95	15.89	18.34	14.5	15.4	8.27	18.29	22.66	13.63	26.96	30.98	4.67	16.81	14.74	3.22	12.62	0.17	0.25	0.39	0	0.2	0	0	0.27	0.39	0	0	0	0	0.61	0.21	0	0.4	0
CNR2	1p36.11	16.35	16.87	18.37	15.23	17.16	13.23	14.83	7.47	18.09	21.15	12.74	25.96	29.76	4.06	15.74	14.51	3.02	12.62	0.04	0	0.1	0.33	0	0	0	0	0	0	0	0	0	0	0	0	0.2	0
IL22RA1	1p36.11	16.9	14.39	19.24	15.23	19.13	16.29	13.12	9.87	22.37	16.01	12.21	25.55	34.39	3.46	21.49	16.55	1.81	12.99	0.04	0	0	0.33	0	0	0.19	0.27	0	0	0	0	0	0	0	0.23	0	0
GRHL3	1p36.11	11.7	12.66	12.24	10.93	10.85	6.87	8.94	5.33	15.76	11.48	9.73	19.11	23.41	4.27	10.85	11.79	0.8	7.34	0	0	0	0	0	0	0	0	0	0	0	0	0	0	0	0	0	0
NIPAL3	1p36.11	11.45	9.93	12.93	11.26	12.03	9.41	8.75	6.67	14.59	12.69	9.2	16.5	27.56	1.42	10	12.7	1.01	9.98	0.72	0.5	0.78	0.99	0.99	0.51	0.38	0.27	0.58	0.6	0.53	1.61	0.24	0.61	0.64	1.13	0.2	1.32
RCAN3	1p36.11	10.95	9.43	15.06	11.26	11.24	8.91	9.89	5.6	12.84	12.08	8.14	16.7	22.93	2.03	9.15	12.24	1.21	8.1	0.06	0.5	0.19	0	0	0.25	0	0	0	0	0	0	0	0	0	0	0.2	0
SRRM1	1p36.11	2.07	1.49	2.82	1.99	2.17	2.29	1.52	0.8	2.72	3.02	2.12	1.81	4.39	0.61	1.7	1.13	0	3.01	0.04	0	0.1	0	0	0	0	0	0	0	0	0	0	0.2	0	0	0	0.38
CLIC4	1p36.11	0.27	0.25	0.29	0	0.59	0.25	0.19	0	0.58	0.3	0	0.2	0.49	0.61	0.21	0	0	0.38	0.11	0.25	0.19	0.33	0.39	0	0	0	0.39	0	0.18	0	0.24	0	0	0	0	0
RUNX3	1p36.11	4.02	2.73	5.25	6.62	3.75	1.02	3.23	2.67	4.47	6.95	2.65	5.23	3.41	1.83	2.98	2.95	0.2	3.77	0.08	0	0.1	0	0.2	0	0.19	0	0	0	0.35	0	0	0	0	0.23	0	0
RHCE	1p36.11	4.69	2.23	6.22	5.63	4.93	2.8	3.8	3.47	6.42	7.55	1.77	6.24	10.73	0.41	3.62	4.31	0	5.08	0.03	0.25	0	0.33	0	0	0	0	0	0	0	0	0	0	0	0.23	0	0
RHD	1p36.11	0.4	0.25	0.39	0.66	0.39	0	0.57	0.53	0.78	0.6	0.35	0.2	0.49	0	0	0.68	0	0.75	0	0	0	0	0	0	0	0	0	0	0	0	0	0	0	0	0	0
SYF2	1p36.11	1.21	0.74	2.04	1.99	0.99	1.02	1.33	0.53	0	1.21	0.53	2.21	3.17	0.2	0	1.13	0	1.51	0.04	0.25	0	0	0	0.51	0	0	0	0	0	0	0	0	0	0	0	0
TMEM50A	1p36.11	4.13	1.74	5.05	5.3	3.94	2.29	3.42	3.2	5.84	7.55	1.59	5.83	7.8	0.41	3.19	4.08	0	4.71	0	0	0	0	0	0	0	0	0	0	0	0	0	0	0	0	0	0
TMEM57	1p36.11	0.88	0.5	1.46	0.66	1.38	0.25	1.14	0.53	0.58	0	0.18	1.41	3.66	0	1.06	0.45	0	0.94	0.06	0	0.1	0	0.2	0.25	0	0	0.19	0	0	0.2	0	0	0	0	0	0.19
LDLRAP1	1p36.11	7.66	7.2	7.97	8.28	6.31	6.87	5.13	3.2	10.12	9.06	6.19	12.47	16.83	2.03	6.17	7.03	0.4	5.65	0.01	0	0	0	0.2	0	0	0	0	0	0	0	0	0	0	0	0	0
MAN1C1	1p36.11	9.64	6.2	11.56	8.61	9.07	6.36	7.79	6.4	9.73	10.57	9.03	14.49	19.76	2.24	9.57	10.2	2.01	8.66	0.24	0.25	0	0	0	0	0.19	1.07	0.19	0.3	0.35	0.8	0	1.02	0	0	0.2	0.38
PAQR7	1p36.11	0.9	0.25	1.55	0.33	1.18	0.51	1.71	1.07	0.39	0.3	0.89	1.21	0.98	0.2	0.64	0.23	0	0.94	0.02	0	0	0	0	0.25	0	0	0	0	0.18	0	0	0	0	0	0	0
STMN1	1p36.11	0.9	0.25	1.55	0.33	1.18	0.51	1.71	1.07	0.39	0.3	0.89	1.21	0.98	0.2	0.64	0.23	0	0.94	0	0	0	0	0	0	0	0	0	0	0	0	0	0	0	0	0	0
PAFAH2	1p36.11	10.56	5.96	10.69	12.91	10.85	6.87	8.56	6.13	17.51	11.48	7.43	16.9	18.78	2.44	10	12.02	0.4	9.42	0.14	0.25	0.1	0	0	0.51	0	0.53	0	0	0	0.2	0.24	0	0	0.23	0.2	0
EXTL1	1p36.11	17.87	14.14	21.96	18.21	18.93	14.76	14.45	9.33	25.1	18.43	14.51	26.76	30.49	4.06	17.87	19.05	1.21	13.94	0.67	0.25	1.07	0.66	0.59	0.76	0.57	0.8	0.58	0.6	0.53	0.8	0.24	0.81	0.64	0.23	0.6	0.75
SLC30A2	1p36.11	15.82	12.9	20.41	13.91	16.77	13.74	12.93	8	22.37	16.62	13.27	23.14	25.85	3.46	15.96	17.01	0.8	12.24	0.06	0	0.1	0	0.2	0.25	0.19	0	0	0	0.18	0	0	0	0	0	0	0
TRIM63	1p36.11	15.82	12.9	20.41	13.91	16.77	13.74	12.93	8	22.37	16.62	13.27	23.14	25.85	3.46	15.96	17.01	0.8	12.24	0.32	0.25	0.29	0.33	0.99	1.02	0.19	0.53	0.19	0	0.35	0	0.24	0	0.21	0	0.4	0.38
PDIK1L	1p36.11	4.4	3.47	5.73	2.98	3.35	3.56	3.42	2.4	6.03	3.32	4.96	6.84	6.83	1.02	5.32	3.17	0	3.95	0.01	0	0.1	0	0	0	0	0	0	0	0	0	0	0	0	0	0	0
ZNF593	1p36.11	21.67	17.62	27.7	22.19	21.3	20.61	19.2	14.13	23.15	19.94	19.82	31.79	41.22	8.54	22.13	19.73	3.62	15.63	0.01	0.25	0	0	0	0	0	0	0	0	0	0	0	0	0	0	0	0
CNKSR1	1p36.11	20.78	17.37	26.43	21.52	20.51	19.08	18.06	13.87	22.57	19.34	18.23	30.99	39.27	8.33	20.43	19.5	3.62	14.5	0.1	0	0.1	0	0	0	0.19	0	0	0.3	0	0.2	0.73	0	0.21	0	0	0
CATSPER4	1p36.11	20.78	17.37	26.43	21.52	20.51	19.08	18.06	13.87	22.57	19.34	18.23	30.99	39.27	8.33	20.43	19.5	3.62	14.5	0.77	0.99	0.49	0	1.18	0.76	0.38	1.33	0.97	1.51	0.89	0.4	0.98	1.22	0.85	0.91	0.6	1.13
SH3BGRL3	1p36.11	4.75	3.97	6.61	3.64	4.34	2.8	3.04	2.93	6.23	6.34	4.6	6.44	9.51	0.81	2.77	5.44	0.2	3.77	0.04	0	0	0	0	0	0.19	0	0	0	0	0	0	0	0	0	0	0.19
CD52	1p36.11	14.01	13.15	15.94	13.58	14.2	8.91	10.08	7.73	15.76	18.13	11.5	20.32	29.51	2.64	12.55	14.51	2.41	11.49	0	0	0	0	0	0	0	0	0	0	0	0	0	0	0	0	0	0
ZNF683	1p36.11	13.98	13.4	15.84	13.58	14	8.91	10.08	7.73	15.76	18.13	11.5	20.32	29.51	2.64	12.55	14.74	2.41	11.11	0.05	0	0.1	0	0	0	0	0.27	0	0	0.18	0	0	0	0	0	0	0.19
LIN28A	1p36.11	6.35	3.97	7.68	6.29	7.5	3.82	3.99	2.93	6.61	12.08	3.72	10.46	14.88	1.22	3.4	7.71	0.2	5.27	0	0	0	0	0	0	0	0	0	0	0	0	0	0	0	0	0	0
DHDDS	1p36.11	7.26	4.47	9.23	7.28	7.69	5.09	4.94	3.47	7.78	12.99	4.25	11.87	17.56	1.22	4.68	8.16	0.2	5.65	0.11	0.25	0	0	0	0.25	0	0.27	0	0	0	0	0.24	0.2	0	0	0.2	0.19
HMGN2	1p36.11	7.17	4.22	9.23	7.28	7.69	4.83	4.94	3.47	7.78	12.08	4.25	11.87	17.56	1.22	4.68	7.71	0.2	5.65	0	0	0	0	0	0	0	0	0	0	0	0	0	0	0	0	0	0
RPS6KA1	1p36.11	17.26	15.38	20.7	17.55	14.99	12.72	14.64	8	23.35	22.05	13.1	26.36	36.1	4.88	16.17	18.59	2.82	13.18	0.04	0	0	0	0	0	0	0	0	0	0	0.2	0	0	0	0	0.4	0.19
ARID1A	1p36.11	2.81	2.48	3.4	1.32	2.56	1.53	2.85	1.6	5.06	4.53	1.42	3.42	8.05	0.2	3.4	2.04	0	1.13	0	0	0	0	0	0	0	0	0	0	0	0	0	0	0	0	0	0
PIGV	1p36.11	1.89	1.74	3.21	0.99	0.99	0.76	1.52	0.8	3.31	2.42	1.77	2.01	6.59	0.2	1.7	2.04	0	0.94	0.36	0.5	0.39	0.66	0.39	0	0.57	0	0.58	0.3	0.35	0	0.49	0	0.21	1.13	0.4	0.19
ZDHHC18	1p36.11	6.65	4.96	6.51	4.64	5.72	4.33	5.13	2.93	9.92	5.74	6.73	12.88	14.63	0.41	7.02	7.26	0.6	5.27	0.01	0	0	0	0	0	0	0	0	0	0	0	0	0	0	0	0	0
SFN	1p36.11	7.42	5.21	7.19	5.3	6.9	5.09	6.27	4	10.51	6.95	6.73	13.68	15.85	0.41	7.66	8.16	1.01	6.4	0.06	0	0	0	0.2	0	0.38	0	0	0.3	0	0	0.24	0	0	0	0	0
GPN2	1p36.11	7.39	5.21	7.19	5.3	6.71	5.09	6.27	4	10.31	6.95	6.73	13.68	15.85	0.41	7.66	8.16	1.01	6.4	0.01	0	0	0	0	0	0	0	0	0	0	0	0	0	0	0	0	0
GPATCH3	1p36.11	7.55	5.21	7.19	5.3	6.71	5.34	6.27	4.27	10.31	6.95	6.9	14.49	16.83	0.41	8.09	8.16	1.01	6.4	0.03	0	0	0	0	0	0	0	0.19	0	0	0	0	0	0	0.23	0	0
NUDC	1p36.11	3.48	1.74	3.79	1.99	3.94	3.56	3.61	2.4	4.86	3.93	2.65	4.43	8.05	0.41	3.83	3.85	0.8	3.01	0.13	0	0	0.33	0	0	0.19	0.27	0	0	0	0.4	0.24	0.2	0.43	0	0.2	0
NR0B2	1p36.11	8.14	5.96	8.16	6.29	8.48	6.11	6.84	4.8	11.28	6.95	7.61	14.89	17.07	0.81	8.72	8.16	1.41	7.16	0.1	0	0.29	0	0	0.51	0	0	0.19	0.3	0	0.2	0	0	0	0	0	0
FAM46B	1p36.11	1.28	0.74	1.26	0.99	1.38	0.25	1.52	0.8	2.53	1.21	1.06	2.62	3.9	0	1.28	0.23	0	1.51	0	0	0	0	0	0	0	0	0	0	0	0	0	0	0	0	0	0
SLC9A1	1p36.11	8.33	7.94	9.14	6.29	6.71	6.36	9.51	5.07	10.7	8.76	6.37	13.88	13.17	2.64	10.64	9.3	1.01	5.65	0.01	0	0	0	0	0	0	0	0	0.3	0	0	0	0	0	0	0	0
WDTC1	1p36.11	1.24	0.74	1.55	0.99	0.39	0.76	1.33	1.07	1.36	3.02	0.53	1.61	3.41	0.2	1.06	1.36	0	2.07	0.02	0	0	0	0	0	0	0	0	0	0	0.4	0	0	0	0	0	0
TMEM222	1p36.11	18.85	16.87	21.77	18.54	16.57	11.7	16.54	10.93	26.26	17.52	16.64	30.18	35.61	6.1	18.09	18.82	4.02	14.12	0.03	0	0.1	0	0	0	0	0	0	0	0.18	0	0	0	0	0.23	0	0
SYTL1	1p36.11	20.46	19.35	23.42	18.87	18.74	12.72	17.3	12	28.6	21.45	18.41	31.19	39.51	6.5	19.36	20.63	3.82	15.25	0.07	0	0	0	0	0	0.19	0.27	0	0.3	0	0	0.24	0.2	0	0	0	0
MAP3K6	1p36.11	20.56	19.35	23.81	18.87	19.33	12.98	17.11	12.53	28.79	22.05	18.58	30.78	39.27	6.71	19.57	20.18	3.82	15.25	0.18	0	0.19	0	0	0.25	0.76	0.27	0	0	0.18	0.2	0	0.2	0	0.23	0.8	0
FCN3	1p36.11	20.72	19.35	24	19.54	19.53	12.98	17.11	13.6	28.79	22.05	18.76	30.78	39.51	6.71	19.57	20.18	3.82	15.25	0.13	0.25	0.1	0	0.2	0	0.38	0.53	0	0	0	0.2	0	0	0	0.23	0	0.38
CD164L2	1p36.11	20.73	19.35	24	19.54	19.53	12.98	17.11	13.6	28.79	22.05	18.76	30.78	39.51	6.71	19.57	20.18	3.82	15.25	0.01	0	0.1	0	0	0	0	0	0	0	0	0	0	0	0	0	0	0
GPR3	1p36.11	19.45	17.87	22.64	18.54	18.15	12.47	16.54	13.33	26.65	21.75	16.64	28.97	36.59	6.3	17.66	18.82	3.42	13.94	0.03	0.25	0	0	0	0	0	0.27	0	0	0	0	0	0	0	0	0	0
WASF2	1p36.11	1.32	1.49	2.43	1.66	1.38	0.25	0.57	1.87	0.97	4.53	1.24	1.01	1.22	0	1.06	1.13	0	0.38	0.07	0	0.19	0.33	0.2	0	0	0	0	0	0	0	0	0.2	0	0.23	0	0
AHDC1	1p36.11	2.65	2.48	3.69	1.66	2.17	1.27	1.71	2.13	4.67	4.23	2.12	3.42	5.37	0.2	1.7	3.17	0	2.07	0	0	0	0	0	0	0	0	0	0	0	0	0	0	0	0	0	0
FGR	1p36.11	0.75	1.24	1.26	1.32	0.79	0.25	0	0.53	0.97	1.81	0.53	0.4	1.46	0	0.64	0.68	0	0.38	0.16	0	0.19	0	0.39	0.25	0	0	0	0	0.35	0.6	0	0.2	0.21	0	0.4	0
IFI6	1p36.11	0.24	1.24	0.19	0.33	0.2	0.25	0	0	0.39	0.3	0	0.2	0.73	0	0.21	0.23	0	0.38	0	0	0	0	0	0	0	0	0	0	0	0	0	0	0	0	0	0
FAM76A	1p35.3	1.66	1.24	3.01	2.32	1.38	0.76	0.76	1.07	0.78	2.11	1.59	1.21	2.93	0	0.64	2.04	0	2.45	0.02	0	0.1	0	0	0	0	0	0	0	0	0	0	0	0	0	0	0
STX12	1p35.3	1.99	2.23	3.6	3.31	1.38	1.27	1.14	1.33	1.36	4.53	1.42	1.81	3.9	0.41	1.06	1.13	0	3.01	0	0	0	0	0	0	0	0	0	0	0	0	0	0	0	0	0	0
PPP1R8	1p35.3	2.06	2.23	3.69	2.98	1.58	1.02	1.14	1.07	1.36	4.53	1.59	2.21	4.88	0.41	0.85	1.36	0	3.2	0.01	0	0	0	0.2	0	0	0	0	0	0	0	0	0	0	0	0	0
RPA2	1p35.3	8.66	5.46	9.82	6.95	9.66	5.6	8.75	4.27	12.45	11.18	6.9	11.67	15.85	2.64	6.81	5.9	0.8	6.78	0	0	0	0	0	0	0	0	0	0	0	0	0	0	0	0	0	0
SMPDL3B	1p35.3	13.6	9.93	15.16	10.93	14.99	7.63	12.55	7.73	19.65	19.03	10.09	22.13	26.1	2.24	11.91	13.38	0.8	10.17	0.63	0.74	0.39	1.99	0.79	1.02	0.38	0.27	0.39	0.91	0.71	0.6	0.98	1.22	0.43	0.23	0	0.38
XKR8	1p35.3	13.63	9.93	15.26	10.6	14.79	7.63	12.74	7.73	20.04	19.03	10.09	22.13	26.1	2.24	11.91	13.38	0.8	10.17	0.03	0	0	0.33	0	0	0	0	0	0	0	0	0	0	0.43	0	0	0
EYA3	1p35.3	1	0.5	1.94	0.66	1.18	0.51	1.33	0.8	0.97	0.91	0.53	1.01	0.98	0.2	0.21	0.68	0	0.94	0.21	0.25	0.39	0.33	0.2	0.25	0	0	0.19	0	0.35	0.2	0	0.61	0	0.23	0.4	0.19
PTAFR	1p35.3	0.5	0.5	0.58	0	0.39	0	0.38	0.53	0.39	1.21	0.53	0.8	0.49	0.2	0	0.68	0.2	0.94	0	0	0	0	0	0	0	0	0	0	0	0	0	0	0	0	0	0
ATPIF1	1p35.3	6.67	4.22	9.04	7.62	7.1	5.09	3.42	4.8	6.61	7.25	4.6	10.66	14.39	1.83	5.32	6.12	1.41	6.03	0.11	0.25	0	0	0.2	0	0.19	0.27	0.19	0	0	0	0	0.2	0.43	0	0.2	0
SESN2	1p35.3	6.67	4.22	9.04	7.62	7.1	5.09	3.42	4.8	6.61	7.25	4.6	10.66	14.39	1.83	5.32	6.12	1.41	6.03	0.02	0	0	0	0	0	0	0	0	0	0	0	0.24	0	0	0	0	0
MED18	1p35.3	0.17	0	0.19	0.33	0.39	0	0.19	0.27	0.19	0	0	0.2	0.73	0.2	0	0	0	0.38	0.01	0	0	0	0	0	0	0	0.19	0	0	0	0	0	0	0	0	0
RCC1	1p35.3	5.44	3.23	6.71	5.63	6.11	5.34	3.04	2.4	7.39	3.32	4.07	8.25	12.2	0.81	5.32	6.12	0	3.58	0.21	0.25	0.29	0.33	0.39	0	0	0.53	0	0	0	0.6	0.24	0	0	0.23	0.2	0.38
TRNAU1AP	1p35.3	5.79	3.72	7.29	5.96	6.31	5.85	3.23	2.67	7.78	4.53	4.6	8.45	12.2	0.81	5.32	6.35	0.2	3.58	0.01	0	0.1	0	0	0	0	0	0	0	0	0	0	0	0	0	0	0
TAF12	1p35.3	0.64	0.5	0.87	0.66	0.2	0.76	0.38	0.27	0.78	1.21	0.71	1.01	0.49	0	0.21	0.23	0.2	0.19	0.01	0	0	0	0	0	0.19	0	0	0	0	0	0	0	0	0	0	0
RAB42	1p35.3	1.67	1.24	2.53	1.66	1.58	1.53	1.33	1.07	1.95	1.21	0.89	2.62	1.46	0.2	2.13	1.36	0.2	1.32	0.03	0	0.1	0	0	0	0	0	0.19	0	0.18	0	0	0	0	0	0	0
GMEB1	1p35.3	0.74	0.25	0.58	0.66	0.99	0.76	0.38	0.53	0.58	1.81	0.35	1.21	1.22	0.2	0.43	1.13	0	0.94	0.01	0	0	0	0	0	0	0	0	0	0	0	0.24	0	0	0	0	0
OPRD1	1p35.3	0.05	0	0	0	0	0	0	0	0.19	0.3	0	0	0	0	0	0	0	0	0	0	0	0	0	0	0	0	0	0	0	0	0	0	0	0	0	0
EPB41	1p35.3	4.27	3.23	4.57	1.99	5.72	2.04	3.42	3.2	6.81	4.53	3.01	5.83	9.02	0.41	3.19	3.4	0.6	3.58	0.79	0.99	1.07	0.66	0.79	0.76	0.95	0.27	0.78	1.21	0.71	0.2	0	1.22	0.85	0.45	0.8	1.13
SRSF4	1p35.3	8.83	6.45	9.91	9.6	11.64	4.07	8.56	5.33	11.48	10.88	7.26	11.27	16.34	0.41	7.45	8.16	2.21	6.21	0	0	0	0	0	0	0	0	0	0	0	0	0	0	0	0	0	0
MECR	1p35.3	7.3	6.2	7.97	8.94	8.09	5.09	7.03	3.73	8.37	11.18	6.55	11.07	12.68	0.61	5.74	6.58	0.8	5.65	0.04	0.25	0	0	0	0	0	0	0	0.3	0	0	0.24	0	0	0	0	0
PTPRU	1p35.3	14.11	12.66	15.84	14.9	12.43	10.43	13.69	8.8	15.76	18.43	11.68	17.71	25.12	3.66	13.83	11.34	3.42	12.05	0.14	0	0	0	0	0.25	0	0.27	0.19	0	0.35	0	0	0	0.21	0.45	0.2	0.38
LAPTM5	1p35.2	13	8.68	15.26	12.91	15.38	7.89	10.65	6.13	14.98	19.34	8.85	21.13	24.39	4.06	14.26	11.11	1.21	10.55	0	0	0	0	0	0	0	0	0	0	0	0	0	0	0	0	0	0
MATN1	1p35.2	13	8.68	15.26	12.91	15.38	7.89	10.65	6.13	14.98	19.34	8.85	21.13	24.39	4.06	14.26	11.11	1.21	10.55	0.45	0.5	0.58	0	0.2	0.25	0.19	0.8	0.39	0.3	0.71	1.01	0.24	0.61	0.64	0.68	0.4	0.75
SDC3	1p35.2	11.57	9.18	10.88	14.24	9.86	5.85	12.36	6.93	16.15	16.92	8.67	17.71	20.73	2.44	10.64	15.42	1.41	9.23	0	0	0	0	0	0	0	0	0	0	0	0	0	0	0	0	0	0
PUM1	1p35.2	10.06	8.93	10.3	12.91	8.48	6.36	9.13	7.47	13.23	10.88	10.8	14.89	17.8	2.64	10	9.98	2.01	8.66	0.05	0	0	0	0	0	0.38	0	0	0	0.18	0	0	0	0	0	0	0.19
SNRNP40	1p35.2	12.96	13.65	14.38	10.93	11.44	9.16	11.6	8.53	21.4	18.13	9.03	17.3	22.44	1.42	10.64	11.79	1.61	8.47	0.03	0	0	0	0	0	0	0	0	0	0	0	0	0	0	0.23	0.2	0
ZCCHC17	1p35.2	8.52	7.2	9.82	7.62	8.88	6.87	8.37	4.53	13.23	12.69	4.78	12.68	15.61	0.61	6.81	7.94	1.01	5.46	0.02	0	0	0	0	0.25	0	0	0	0	0.18	0	0	0	0	0	0	0
FABP3	1p35.2	1.36	0.25	1.65	1.66	0.99	1.02	0.38	0.8	2.33	3.63	1.06	3.02	2.68	0.2	0.64	1.81	0	1.32	0.01	0.25	0	0	0	0	0	0	0	0	0	0	0	0	0	0	0	0
SERINC2	1p35.2	15.55	14.39	15.55	13.25	14.99	11.96	15.4	10.4	22.76	19.34	9.91	24.95	24.63	2.03	15.11	13.38	1.61	11.3	0.02	0	0	0	0	0	0	0	0	0	0	0	0	0	0	0	0.2	0.19
TINAGL1	1p35.2	9.66	9.93	12.15	8.28	9.47	8.65	10.84	5.33	13.23	14.5	6.9	12.88	17.07	1.02	7.87	8.84	1.41	7.91	0.18	0.25	0.39	0	0	0	0	0.53	0	0.3	0.35	0	0.49	0.2	0	0	0.2	0.19
HCRTR1	1p35.2	9.81	10.42	12.93	8.28	9.66	8.65	10.84	5.33	13.23	14.5	6.9	13.08	17.07	1.02	8.09	9.07	1.41	7.91	0.09	0.25	0	0	0	0	0.38	0	0	0.3	0	0.2	0	0	0.21	0	0.2	0.19
PEF1	1p35.2	9.57	10.42	12.54	7.95	9.66	8.65	10.65	5.07	13.04	13.6	6.9	12.88	16.83	1.02	7.66	8.39	1.41	7.91	0.09	0	0.1	0.33	0.2	0	0	0	0	0	0.35	0	0	0.2	0	0.23	0	0.19
BAI2	1p35.2	5.99	4.96	5.83	6.62	4.14	2.54	7.03	4.8	8.95	9.97	4.07	9.26	8.78	1.02	7.45	4.31	0.4	6.4	0	0	0	0	0	0	0	0	0	0	0	0	0	0	0	0	0	0
SPOCD1	1p35.2	9.64	6.95	9.14	8.28	11.05	6.36	8.94	5.33	14.2	11.78	6.02	18.31	17.32	2.24	11.7	9.07	0.2	6.78	0.01	0	0	0	0	0	0	0	0	0	0	0	0	0	0	0	0	0
PTP4A2	1p35.2	0.24	0.25	0.49	0	0.39	0.76	0	0.27	0.39	0	0.18	0	0	0	0.64	0.45	0	0.19	0.04	0.25	0	0	0	0.25	0	0	0	0	0.18	0	0	0	0	0	0	0
KHDRBS1	1p35.1	0.37	0.25	0.58	0.33	0.39	0.25	0.57	0.53	0.19	0.3	0.53	0	0.73	0	0	0	0.2	0	0	0	0	0	0	0	0	0	0	0	0	0	0	0	0	0	0	0
TMEM39B	1p35.1	2.19	1.99	3.01	2.65	2.17	1.02	2.28	1.6	2.33	4.53	2.48	1.61	5.61	0.41	1.28	0.91	0.2	1.51	0.03	0	0.1	0	0.2	0	0	0	0	0	0	0	0	0	0	0	0	0
KPNA6	1p35.1	1.07	0.5	1.26	1.99	1.38	0.25	0.95	0.27	1.17	3.02	0.89	0.8	2.2	0.41	0.21	0.45	0	0.94	0.02	0	0.1	0	0	0	0	0	0	0	0	0	0	0	0	0	0.2	0
TXLNA	1p35.1	9.19	6.45	9.62	5.63	10.85	5.85	9.13	6.13	13.62	12.69	6.19	16.3	15.61	1.22	8.51	9.52	0.8	7.16	0.03	0	0.1	0	0	0	0	0	0	0	0	0	0	0	0.21	0.23	0	0
CCDC28B	1p35.1	9.25	6.45	9.82	5.63	10.85	5.85	9.13	6.13	13.62	12.69	6.19	16.7	15.61	1.22	8.51	9.52	0.8	7.53	0.05	0	0.1	0	0.2	0	0	0	0.19	0.3	0	0	0	0	0	0	0.2	0
IQCC	1p35.1	9.24	6.45	9.82	5.63	10.85	5.85	9.13	6.13	13.62	12.69	6.19	16.7	15.61	1.22	8.51	9.52	0.8	7.53	0.17	0.25	0.1	0	0.2	0	0.38	0	0.19	0.3	0.35	0.2	0.24	0	0.21	0	0.4	0.19
EIF3I	1p35.1	9.11	6.45	9.91	6.29	10.45	5.6	8.75	6.13	13.42	12.39	5.84	16.5	15.61	1.02	8.3	9.3	0.8	7.16	0	0	0	0	0	0	0	0	0	0	0	0	0	0	0	0	0	0
LCK	1p35.1	1.17	1.24	1.07	1.32	1.58	1.27	1.9	1.07	1.36	0.91	0.53	2.62	2.44	0	0.43	0.23	0	1.32	0.06	0	0	0	0	0.25	0	0.27	0	0	0	0	0.24	0	0	0.23	0	0.19
HDAC1	1p35.1	1.62	1.49	1.17	1.32	2.37	2.04	2.66	1.07	2.14	1.21	0.71	3.42	3.41	0.2	0.85	0.45	0	1.69	0.04	0	0	0	0	0	0.19	0	0.19	0	0	0	0	0	0.43	0	0	0
MARCKSL1	1p35.1	2.62	2.48	3.21	1.99	2.96	2.8	4.18	1.07	3.11	3.32	1.42	3.82	5.61	0.2	2.34	2.72	0	1.88	0	0	0	0	0	0	0	0	0	0	0	0	0	0	0	0	0	0
TSSK3	1p35.1	2.49	1.99	3.01	1.99	2.56	2.8	3.99	0.8	3.11	3.32	1.42	3.62	4.88	0.2	2.34	2.72	0	1.69	0.06	0.5	0	0	0	0	0.38	0.27	0	0	0	0	0	0.2	0	0	0	0
BSDC1	1p35.1	1.73	1.49	2.62	1.66	1.58	1.53	2.28	0.53	1.75	2.72	0.89	2.21	2.93	0	1.91	2.72	0	0.94	0.03	0	0	0.33	0	0	0	0	0	0	0	0	0	0	0	0	0.2	0
ZBTB8A	1p35.1	3.31	2.48	3.98	1.99	2.96	1.78	2.85	2.4	3.89	5.14	2.48	5.63	4.88	0.61	4.26	3.17	0.4	3.2	0.04	0	0	0.33	0	0	0	0.53	0	0	0	0	0	0	0	0	0	0
ZBTB8OS	1p35.1	8.07	6.45	9.04	9.6	6.71	5.34	6.08	5.6	10.7	12.39	7.26	11.47	13.17	1.83	8.51	8.16	0.4	6.59	0	0	0	0	0	0	0	0	0	0	0	0	0	0	0	0	0	0
RBBP4	1p35.1	6.75	5.71	8.16	9.93	5.92	5.09	4.56	5.33	8.95	10.27	5.66	8.65	10.73	1.63	6.6	6.8	0.2	5.27	0	0	0	0	0	0	0	0	0	0	0	0	0	0	0	0	0	0
SYNC	1p35.1	6.09	5.21	7.39	8.61	4.73	4.83	4.18	4.53	8.95	9.06	5.13	8.05	9.76	1.42	6.6	5.67	0.2	4.33	0.23	0.25	0.58	0.33	0	0	0.19	0.27	0	0	0.35	0	0	0.61	0	0.23	0	0.56
YARS	1p35.1	6.57	6.95	7.97	5.96	8.48	4.33	5.89	3.73	8.95	7.85	4.07	10.46	10.73	1.02	5.11	7.94	0.2	4.14	0.09	0	0.19	0	0	0.25	0	0.27	0.19	0.3	0.18	0	0	0.2	0	0.23	0	0
S100PBP	1p35.1	6.07	7.2	7.19	6.29	7.5	3.31	5.7	2.93	8.37	6.34	3.72	9.26	10.24	1.02	4.04	7.03	0.2	4.14	0	0	0	0	0	0	0	0	0	0	0	0	0	0	0	0	0	0
FNDC5	1p35.1	1.31	1.74	1.46	1.99	0.79	1.78	0.76	0.8	2.72	3.02	0.71	1.61	1.71	0.61	0.21	1.36	0	0.75	0	0	0	0	0	0	0	0	0	0	0	0	0	0	0	0	0	0
HPCA	1p35.1	2.38	1.99	3.79	3.64	1.78	1.27	1.14	0.8	4.86	3.02	1.24	4.23	3.41	0.61	2.34	1.36	0	1.69	0	0	0	0	0	0	0	0	0	0	0	0	0	0	0	0	0	0
TMEM54	1p35.1	5.52	5.46	6.32	6.62	5.92	4.58	4.18	2.67	9.34	5.14	3.01	9.86	6.83	1.63	5.11	5.9	0.2	3.01	0	0	0	0	0	0	0	0	0	0	0	0	0	0	0	0	0	0
RNF19B	1p35.1	5.8	5.21	6.22	6.62	7.3	6.11	3.99	2.93	9.34	3.32	3.36	10.06	9.27	1.42	5.53	5.9	0.4	4.33	0.01	0.25	0	0	0	0	0	0	0	0	0	0	0	0	0	0	0	0
AK2	1p35.1	1.21	1.49	2.33	1.99	0.99	0.25	0.57	1.33	2.14	0.6	1.42	2.01	0.98	0	1.28	0.68	0	0.94	0.29	0.25	0.19	0.66	0.79	0.51	0.19	0	0.19	0	0.18	0.2	0.49	0.2	0.85	0.23	0.2	0.19
TRIM62	1p35.1	2.09	0.99	2.24	2.98	3.35	0.76	0.19	1.33	1.95	5.14	0.89	2.01	2.44	0.61	0.85	1.59	0.6	2.45	0.01	0	0	0	0	0	0	0	0.19	0	0	0	0	0	0	0	0	0
ZNF362	1p35.1	7.77	7.2	6.51	6.95	6.71	3.82	7.41	4.27	12.45	9.67	7.26	12.88	12.44	1.22	7.45	7.94	0.4	5.46	0	0	0	0	0	0	0	0	0	0	0	0	0	0	0	0	0	0
PHC2	1p35.1	12.46	10.67	12.63	9.27	12.23	10.18	10.84	5.6	17.9	13.6	12.92	19.11	20.73	2.44	15.11	11.11	1.61	9.42	0.01	0	0	0	0	0	0	0	0	0	0.18	0	0	0	0	0	0	0
CSMD2	1p35.1	20.84	20.6	22.84	18.87	19.33	14.76	18.44	12.8	27.63	25.38	16.11	29.78	33.17	5.49	22.98	21.09	3.22	14.12	0.32	0	0.29	0	0	0.51	0.57	0.53	0.39	0.91	0	0.4	0	0.41	0.85	0	0.4	0
C1orf94	1p34.3	7.53	7.94	8.55	6.62	6.51	5.09	7.6	3.73	11.67	7.85	6.55	9.86	12.93	2.44	7.45	6.12	1.41	6.21	0.08	0	0.1	0	0	0	0	0	0.19	0	0	0	0.24	0	0.21	0.23	0.2	0.19
GJB5	1p34.3	14.11	10.17	16.62	12.91	13.21	9.67	11.03	9.07	20.04	17.52	12.74	21.93	25.37	3.25	16.38	15.19	1.41	9.04	0.6	0.5	0.68	0	0.39	0.51	1.33	0.8	1.36	0.3	0.35	1.01	0.98	1.02	0	0.23	0.4	0.56
GJB4	1p34.3	12.49	9.43	14.09	10.6	11.64	8.91	9.7	8	17.51	16.01	12.04	19.52	21.95	2.85	14.89	12.93	1.21	7.72	0.81	1.24	0.97	0.33	0.59	1.53	0.57	1.33	1.17	0.91	0.89	0.8	0.24	0.61	0.64	1.13	1.01	0.94
GJB3	1p34.3	12.45	9.43	14.67	9.93	10.85	9.41	9.7	8.27	17.9	14.2	10.8	19.72	24.39	2.44	15.11	13.83	1.21	6.78	0.48	0.5	0.87	0.33	0	1.02	0	0.53	0.39	0.3	0.53	0.2	0.49	0.41	0.64	0.91	0.2	0.56
GJA4	1p34.3	14.11	10.17	16.62	12.91	13.21	9.67	11.03	9.07	20.04	17.52	12.74	21.93	25.37	3.25	16.38	15.19	1.41	9.04	0.33	0.5	0.39	0.33	0.79	0	0.38	0	0.39	0.3	0.35	0	0	0.41	0.64	0.91	0	0.56
DLGAP3	1p34.3	3.87	2.48	3.69	3.31	3.94	2.54	2.66	2.67	6.42	3.32	2.65	8.05	7.32	0.2	2.98	4.08	0	2.82	0	0	0	0	0	0	0	0	0	0	0	0	0	0	0	0	0	0
ZMYM6	1p34.3	3.37	2.23	5.15	3.64	3.75	3.31	2.09	3.47	2.92	7.25	2.3	3.82	6.83	0.61	2.13	2.95	0.2	2.82	0.03	0	0.1	0.33	0	0	0	0	0	0	0	0	0	0	0	0	0	0
SFPQ	1p34.3	2.9	2.98	4.66	6.95	2.96	2.29	1.9	2.4	2.14	7.25	1.95	1.81	3.66	0.41	1.06	3.17	1.41	2.26	0.04	0	0	0	0	0	0	0	0	0	0	0.2	0	0.41	0.21	0	0	0
ZMYM4	1p34.3	4.15	2.73	4.08	5.3	6.51	2.04	2.85	2.93	4.67	8.46	2.83	3.02	8.29	1.02	3.62	3.63	0.4	3.2	0.01	0	0	0	0	0	0	0	0	0.3	0	0	0	0	0	0	0	0
KIAA0319L	1p34.3	3.84	2.98	5.15	6.62	3.16	3.05	2.28	2.67	3.7	10.57	1.95	4.23	6.1	0.61	3.4	4.31	0.4	2.82	0.03	0	0	0	0.2	0	0	0	0	0	0	0.2	0.24	0	0	0	0	0
NCDN	1p34.3	2.52	1.74	3.69	4.64	3.16	1.27	1.71	1.87	2.92	6.04	1.59	2.62	3.41	0.2	1.28	2.49	0	2.07	0	0	0	0	0	0	0	0	0	0	0	0	0	0	0	0	0	0
TFAP2E	1p34.3	2.65	1.74	3.89	4.64	3.16	1.53	1.9	1.87	3.5	6.04	1.59	2.62	3.9	0.2	1.28	2.49	0	2.26	0.45	0.74	0.49	0.33	0.59	1.02	0.38	0.27	0.58	0.91	0.89	0	0.73	0	0.64	0.45	0.2	0.19
PSMB2	1p34.3	1.4	1.24	1.94	2.65	1.38	1.02	1.14	1.07	1.56	1.81	1.24	1.01	2.68	0.2	0.64	1.59	0	1.51	0	0	0	0	0	0	0	0	0	0	0	0	0	0	0	0	0	0
C1orf216	1p34.3	7.28	7.44	7.87	6.62	9.66	4.07	5.13	3.2	10.7	9.67	4.6	10.66	14.88	0	7.02	7.48	0.4	4.9	0.04	0	0	0	0	0.25	0	0	0	0	0	0.2	0.24	0	0	0	0	0.19
CLSPN	1p34.3	7.63	7.69	7.97	6.62	9.66	4.58	5.32	3.47	11.09	10.27	4.6	11.27	16.1	0.2	7.23	8.39	0.4	5.08	0.02	0	0.1	0	0	0	0	0	0	0	0	0	0	0.2	0	0	0	0
TEKT2	1p34.3	5.22	3.97	5.05	5.63	5.52	4.83	4.75	1.87	8.75	12.99	2.65	8.25	6.34	1.42	3.83	5.22	1.01	3.77	0.08	0.25	0.19	0	0.2	0	0.19	0	0	0.6	0	0	0	0	0	0.23	0	0
ADPRHL2	1p34.3	7.37	6.2	7.39	7.28	6.31	6.87	7.6	2.4	11.48	14.5	4.96	11.07	10.24	2.03	5.96	7.71	1.21	6.21	0.01	0	0	0	0.2	0	0	0	0	0	0	0	0	0	0	0	0	0
COL8A2	1p34.3	7.38	6.2	7.39	7.28	6.31	6.87	7.6	2.4	11.67	14.5	4.96	11.07	10.24	2.03	5.96	7.71	1.21	6.21	0.04	0	0	0	0	0	0.19	0	0	0.6	0	0	0	0	0.21	0	0	0
TRAPPC3	1p34.3	8.13	6.95	7.19	7.62	7.3	6.62	8.37	2.67	14.2	12.39	5.66	13.48	11.71	2.85	8.72	7.71	1.01	6.03	0	0	0	0	0	0	0	0	0	0	0	0	0	0	0	0	0	0
MAP7D1	1p34.3	5.93	5.71	5.73	5.3	4.54	4.33	6.08	1.87	10.31	6.65	4.6	10.87	9.02	1.63	6.38	5.67	0.4	3.95	0	0	0	0	0	0	0	0	0	0	0	0	0	0	0	0	0	0
THRAP3	1p34.3	6.77	4.96	7.87	6.95	6.9	3.31	4.37	2.93	12.45	5.74	4.07	9.05	13.41	0.61	7.02	6.35	0.4	6.97	0	0	0	0	0	0	0	0	0	0	0	0	0	0	0	0	0	0
STK40	1p34.3	8.42	6.95	8.16	6.95	8.09	6.36	6.46	5.33	14.59	7.55	4.96	14.49	15.12	0.81	9.57	6.12	0.2	7.72	0.04	0	0.19	0	0	0.25	0	0	0	0	0	0.2	0	0	0	0	0	0
LSM10	1p34.3	14.9	12.16	15.65	15.23	15.19	9.41	12.17	9.6	22.57	14.8	9.73	23.14	27.8	2.44	19.15	12.47	0.8	10.73	0	0	0	0	0	0	0	0	0	0	0	0	0	0	0	0	0	0
OSCP1	1p34.3	19.76	17.62	20.51	19.87	19.33	16.54	17.49	11.73	27.24	19.64	16.46	29.98	35.37	5.89	23.83	17.23	2.41	12.99	0.04	0	0	0	0	0	0	0.27	0	0	0	0	0	0	0	0.23	0	0
MRPS15	1p34.3	19.75	17.37	20.51	19.87	19.33	16.54	17.49	11.73	27.24	19.64	16.46	29.98	35.37	5.89	23.83	17.23	2.41	12.99	0.21	0	0.29	0.33	0.2	0	0.19	0.53	0	0.3	0.18	0.4	0	0.61	0.43	0.23	0	0.38
CSF3R	1p34.3	17.36	14.89	17.78	15.89	15.78	13.49	15.4	10.13	25.88	18.13	14.69	27.57	30.73	4.67	20.64	15.87	2.01	10.92	0.13	0	0.19	0	0.2	0.25	0	0	0	0	0.35	0	0.49	0.2	0	0	0.2	0
GRIK3	1p34.3	7.82	8.19	9.62	6.95	4.73	4.58	5.7	5.87	12.45	6.04	5.84	15.29	9.76	0.81	8.51	6.12	0.6	5.84	0.22	0.5	0	0.33	0	0	0	0	0	0	0.35	0	0.73	0.2	0	0.45	0.4	0.56
ZC3H12A	1p34.3	7.2	5.21	7	5.96	4.93	2.8	5.51	3.73	12.26	5.14	5.66	12.47	12.44	1.83	7.87	5.67	1.61	4.9	0.01	0	0.1	0	0	0	0	0	0	0	0	0	0	0	0	0	0	0
MEAF6	1p34.3	9.25	6.45	9.04	8.61	6.51	5.85	7.6	5.87	15.37	6.95	6.73	15.69	17.56	2.85	9.15	7.48	1.81	6.03	0	0	0	0	0	0	0	0	0	0	0	0	0	0	0	0	0	0
SNIP1	1p34.3	13.31	11.17	14.19	12.91	11.24	11.2	9.89	6.67	23.15	14.2	9.91	20.32	23.9	3.46	14.04	11.79	2.21	7.91	0.01	0	0	0	0	0	0	0	0	0	0	0	0	0	0	0	0.2	0
DNALI1	1p34.3	12.81	10.92	13.61	12.58	11.24	10.94	9.51	5.6	22.76	13.9	9.56	19.32	22.93	2.85	13.19	11.56	2.01	7.72	0.08	0	0.1	0	0.2	0	0.19	0	0	0	0.35	0	0	0.2	0.21	0	0	0
GNL2	1p34.3	12.56	10.42	13.51	12.25	10.45	10.69	9.32	5.33	22.37	13.9	8.67	19.32	22.2	2.64	12.98	11.11	2.01	7.72	0.13	0	0.1	0.66	0.2	0	0.19	0	0.19	0	0	0	0	0.41	0.43	0	0	0.19
C1orf109	1p34.3	13.39	10.67	14.19	12.58	12.62	10.94	11.03	8	22.57	12.99	12.21	18.91	22.93	2.64	13.83	12.47	2.01	8.1	0.13	0	0.29	0	0.2	0.25	0.19	0	0	0	0	0.6	0.24	0	0	0	0	0
CDCA8	1p34.3	13.39	10.67	14.19	12.58	12.62	10.94	11.03	8	22.57	12.99	12.21	18.91	22.93	2.64	13.83	12.47	2.01	8.1	0.01	0	0	0	0	0	0	0	0	0	0.18	0	0	0	0	0	0	0
EPHA10	1p34.3	9.72	9.68	10.2	8.28	8.68	7.38	7.98	6.13	17.9	11.78	8.14	14.49	14.88	2.44	10.64	8.62	1.41	4.52	0.31	0	0.19	0.66	0.39	0.25	0.19	0.27	0.39	0.3	0.35	0.6	0.49	0.61	0	0.45	0.6	0.56
MANEAL	1p34.3	6.54	7.44	6.32	5.96	6.51	5.85	5.32	3.2	10.31	6.95	4.6	13.08	10.49	1.83	7.02	6.58	1.41	2.82	0.27	0	0.1	0.66	0	0.76	0.19	0.53	0.58	0.3	0.18	0	0.24	0.61	0.21	0	0.4	0.19
YRDC	1p34.3	6.54	7.44	6.32	5.96	6.51	5.85	5.32	3.2	10.31	6.95	4.6	13.08	10.49	1.83	7.02	6.58	1.41	2.82	0.04	0	0	0	0.2	0	0	0	0	0	0	0.2	0	0.2	0	0	0.2	0
C1orf122	1p34.3	6.66	7.44	6.32	5.96	6.51	5.85	5.32	3.2	10.7	6.95	4.6	13.28	11.22	1.83	7.02	6.58	1.41	2.82	0	0	0	0	0	0	0	0	0	0	0	0	0	0	0	0	0	0
MTF1	1p34.3	6.59	7.44	6.32	5.96	6.51	5.85	5.32	3.2	10.7	6.95	4.6	13.28	10.73	1.83	6.81	6.58	1.41	2.82	0	0	0	0	0	0	0	0	0	0	0	0	0	0	0	0	0	0
SF3A3	1p34.3	12.62	12.41	13.61	10.93	11.24	13.49	11.41	8.27	17.51	12.99	11.86	18.91	20.49	2.03	12.77	9.98	2.21	7.16	0.01	0	0	0	0.2	0	0	0	0	0	0	0	0	0	0	0	0	0
FHL3	1p34.3	12.62	12.41	13.61	10.93	11.24	13.49	11.41	8.27	17.51	12.99	11.86	18.91	20.49	2.03	12.77	9.98	2.21	7.16	0.31	0.25	0.68	0.33	0.2	0.25	0.19	0.8	0	0.6	0.18	0.2	0.49	0.2	0.64	0.23	0.2	0
UTP11L	1p34.3	11.77	11.17	12.83	10.93	10.06	12.47	10.27	7.2	16.93	12.39	11.15	17.71	18.54	1.83	11.7	9.07	2.01	6.78	0.11	0	0.1	0	0	0	0	0.27	0.39	0	0	0.4	0	0	0	0.23	0	0.38
POU3F1	1p34.3	5.48	4.47	5.25	4.3	4.54	5.09	5.13	2.93	10.89	6.65	4.42	9.05	9.02	0.2	4.89	5.44	0.2	2.64	0	0	0	0	0	0	0	0	0	0	0	0	0	0	0	0	0	0
RRAGC	1p34.3	13.23	12.16	13.61	11.26	11.64	9.16	10.65	6.4	20.04	12.39	9.2	22.13	24.39	2.24	15.53	12.7	1.21	7.34	0.01	0	0	0	0	0	0	0	0	0	0	0	0	0	0	0.23	0	0
MYCBP	1p34.3	13.25	12.16	13.7	11.26	11.64	9.16	10.65	6.67	20.04	12.39	9.2	22.13	24.39	2.24	15.53	12.7	1.21	7.34	0	0	0	0	0	0	0	0	0	0	0	0	0	0	0	0	0	0
GJA9	1p34.3	13.68	12.66	14.48	11.59	12.23	9.16	11.6	7.2	20.04	12.39	9.56	22.94	24.63	2.44	16.17	13.15	1.21	7.53	0.69	0.99	1.17	0	0.59	0.51	0.38	0.53	0.58	1.21	0.71	0.8	1.22	0.2	0.64	0.23	1.61	0.56
RHBDL2	1p34.3	12.73	12.16	13.61	10.93	11.05	8.91	10.46	6.93	19.26	11.48	9.03	20.93	22.93	1.83	14.47	12.47	1.01	6.78	0.03	0	0.1	0	0	0	0	0.27	0	0	0	0	0	0.2	0	0	0	0
AKIRIN1	1p34.3	5.64	4.96	6.51	4.97	5.33	2.54	3.61	2.93	9.92	4.23	4.25	11.27	8.78	0.61	6.81	4.76	0.2	3.01	0	0	0	0	0	0	0	0	0	0	0	0	0	0	0	0	0	0
NDUFS5	1p34.3	5.64	4.96	6.51	4.97	5.33	2.54	3.61	2.93	9.92	4.23	4.25	11.27	8.78	0.61	6.81	4.76	0.2	3.01	0.05	0	0.19	0	0	0	0	0	0.19	0	0	0	0	0	0	0.23	0	0
MACF1	1p34.3	22.78	23.33	24.1	25.83	21.1	15.52	19.01	10.67	28.6	24.17	21.77	32.39	36.1	8.33	22.77	22.22	4.83	18.27	0.71	0.5	0.58	0	0.79	0.51	1.14	0.27	0.97	0.91	0.18	0.8	1.46	0	0.64	1.13	0.6	0.56
BMP8A	1p34.3	5.86	5.96	5.93	6.29	6.51	1.53	5.13	3.2	8.56	6.04	3.01	10.06	9.27	0.61	6.81	5.22	0	4.14	0.18	0	0.1	0	0.2	0	0.38	0.27	0.39	0	0.18	0.2	0	0.2	0.43	0	0.4	0.56
PABPC4	1p34.3	3.43	3.23	3.89	2.98	2.56	1.53	3.99	1.6	7.2	2.42	3.01	5.43	4.88	0.41	4.26	2.72	0.2	2.26	0	0	0	0	0	0	0	0	0	0	0	0	0	0	0	0	0	0
HEYL	1p34.3	4.07	2.73	4.18	3.64	2.56	2.54	3.04	1.6	6.23	6.34	2.12	7.24	6.83	0.61	4.04	3.63	0.2	1.88	0.07	0.25	0	0	0	0	0	0	0.19	0.91	0	0	0	0	0.21	0	0	0
HPCAL4	1p34.2	4.91	6.45	4.96	3.31	4.73	2.8	3.42	2.4	8.17	6.95	3.54	7.65	6.34	1.63	4.68	6.35	0.8	2.26	0.04	0	0	0	0	0.25	0	0	0.19	0	0.18	0	0	0	0.21	0	0	0
NT5C1A	1p34.2	7.38	7.94	7.09	5.63	5.92	4.07	5.32	3.2	11.87	10.88	4.96	12.47	10.98	2.24	7.23	7.94	1.01	3.77	0.17	0	0.19	0	0.39	0	0	0	0.39	0	0.18	0.2	0	0.2	0	0	0.4	0.19
PPIE	1p34.2	5.18	3.97	5.15	4.64	4.34	2.29	3.42	3.2	7.78	6.65	2.65	7.24	9.51	0.41	4.26	4.08	0.6	4.33	0.03	0	0.1	0	0	0	0	0	0	0	0	0	0	0	0	0	0.2	0
BMP8B	1p34.2	5.18	3.97	5.15	4.64	4.34	2.29	3.42	3.2	7.78	6.65	2.65	7.24	9.51	0.41	4.26	4.08	0.6	4.33	0.23	0.25	0.29	0.66	0.39	0.51	0	0	0	0.3	0.35	0.2	0	0.41	0.21	0.45	0.2	0
OXCT2	1p34.2	5.18	3.97	5.15	4.64	4.34	2.29	3.42	3.2	7.78	6.65	2.65	7.24	9.51	0.41	4.26	4.08	0.6	4.33	0.01	0	0	0	0	0	0	0	0.19	0	0	0	0	0	0	0	0	0
TRIT1	1p34.2	5.6	4.71	7.19	5.96	6.11	3.31	4.37	2.13	9.73	6.95	3.36	7.85	7.8	0.81	3.19	4.54	1.21	4.14	0.24	0.25	0	0.33	0.39	0.25	0	0.53	0	0	0.71	0	0	0.61	0.43	0.45	0	0.19
MFSD2A	1p34.2	2.87	1.49	3.01	1.99	2.17	1.78	2.28	1.07	3.89	4.83	2.83	3.02	5.37	0.61	1.91	2.72	0.6	2.82	0.31	0.25	0.29	0.33	0.59	0.25	0.19	0.27	0.19	0	0.18	0.2	0.49	0.41	0.85	0.45	0.4	0.38
PPT1	1p34.2	2.25	1.99	2.14	1.66	1.78	2.54	1.33	1.33	1.75	4.83	0.89	3.02	2.93	0.61	1.49	4.31	0.2	2.07	0.5	0.25	0.58	0.33	0.2	0.25	0.57	0.27	0.58	0.3	0.71	0.6	0.49	0.61	0.64	0.23	0.2	0.94
RLF	1p34.2	5.8	5.46	5.73	6.62	4.54	3.05	5.89	2.93	10.12	4.83	3.89	9.86	9.27	1.02	5.74	4.99	0.4	5.08	0.01	0	0	0	0	0	0	0	0	0	0	0	0	0	0	0	0	0.19
TMCO2	1p34.2	9.21	9.93	9.04	9.6	7.3	4.83	7.41	4.8	14.98	9.97	5.49	15.69	14.63	1.63	10.21	7.94	1.01	7.16	0.13	0.25	0.19	0	0.2	0.25	0.19	0.27	0	0	0.18	0	0.24	0.2	0.21	0.23	0	0
ZMPSTE24	1p34.2	14.66	15.63	16.33	13.91	12.03	8.65	11.79	7.47	24.32	16.62	10.62	23.94	23.41	3.46	14.47	13.15	2.41	11.11	0.1	0	0	0.33	0	0	0	0	0.19	0	0	0.2	0	0	0	0.23	0.2	0.38
COL9A2	1p34.2	11.01	11.17	12.24	10.26	9.47	6.62	8.75	5.6	18.29	14.2	8.14	18.91	16.59	2.44	9.79	9.98	2.01	8.47	0.59	0.25	0.39	0.99	0.59	0.51	1.71	0.8	1.36	0.3	1.06	0.8	0.24	0.61	0.43	0.68	0.2	0.75
SMAP2	1p34.2	6.17	5.21	6.9	5.63	7.1	3.05	4.37	3.73	8.75	9.97	4.6	8.85	10.24	1.42	5.53	3.63	1.41	4.9	0.01	0	0	0	0.2	0	0	0	0	0	0	0	0	0	0	0	0	0
ZNF684	1p34.2	7.39	9.93	8.55	6.29	7.89	3.31	4.75	5.07	9.34	11.78	5.66	11.67	14.15	1.63	7.02	5.67	1.21	5.27	0.06	0.25	0	0	0	0	0.19	0	0	0	0	0	0	0.2	0.21	0.23	0	0.19
RIMS3	1p34.2	3.52	4.22	3.11	3.64	3.94	2.29	1.9	1.87	7.59	3.93	1.95	6.04	7.32	0.61	3.4	4.31	0.2	1.32	0.06	0	0	0	0	0	0.38	0	0	0	0.35	0	0.24	0	0	0	0	0
NFYC	1p34.2	5.09	4.71	4.08	5.63	4.93	2.04	4.37	2.4	9.73	5.14	2.3	10.66	8.05	0.81	5.32	3.4	0	3.39	0	0	0	0	0	0	0	0	0	0	0	0	0	0	0	0	0	0
KCNQ4	1p34.2	10.46	10.42	8.84	11.92	9.07	5.6	7.03	5.87	17.51	12.08	7.08	15.29	12.93	3.86	10.43	10.88	2.21	6.4	0.23	0	0.19	0	0.39	0	0.19	0	0.19	0.6	0.53	0	0.24	0.2	0.21	0.45	0.2	0.19
SLFNL1	1p34.2	3.61	3.72	2.53	1.99	1.97	1.78	1.71	1.33	6.81	5.14	2.12	7.65	6.1	0.81	5.32	3.4	0	2.26	0.11	0.25	0.1	0	0.59	0	0	0	0	0	0	0.2	0.24	0	0.21	0	0.2	0.38
SCMH1	1p34.2	4.25	6.2	4.86	3.31	3.35	2.8	2.66	2.4	5.45	6.34	1.95	8.25	7.56	0	3.19	2.49	0.2	1.88	0.01	0	0	0	0	0	0	0	0	0	0	0	0	0	0	0	0	0
EDN2	1p34.2	2.21	2.23	2.92	3.31	1.97	0.76	1.52	1.87	2.72	0.91	1.06	3.42	1.71	0.41	2.34	2.27	0.2	1.51	0.09	0	0.1	0	0.2	0	0.19	0	0.19	0	0	0	0	0.2	0.21	0	0.2	0
HIVEP3	1p34.2	9.99	6.45	11.76	10.6	8.68	5.6	8.17	5.6	16.15	11.18	5.66	17.3	15.61	1.63	10.85	7.94	0.4	5.27	0.01	0	0	0	0	0	0.19	0	0	0	0	0	0	0	0	0	0	0
GUCA2B	1p34.2	8.79	10.67	8.36	9.93	7.69	5.09	7.22	4.8	16.15	9.97	7.43	13.48	11.71	1.63	10	7.71	1.61	5.27	0.02	0	0	0	0	0	0.19	0	0	0	0	0	0	0	0	0	0.2	0
GUCA2A	1p34.2	5.92	5.96	5.93	6.29	6.9	2.29	4.56	3.73	10.31	4.83	4.6	9.26	8.78	0.41	7.02	4.76	0.4	3.01	0.32	0.25	0.19	0	0.59	0.25	0.19	1.33	0.19	0	0.35	0.8	1.22	0.2	0.21	0.23	0.2	0
FOXJ3	1p34.2	7.69	8.19	7.09	7.62	6.9	2.54	6.08	3.73	15.56	8.76	7.08	12.68	10.98	0.2	9.57	5.67	0.4	4.9	0.27	0.25	0.1	0.66	0.59	0	0.38	0	0.19	0.91	0	0	0.24	0	0.21	0.45	0.8	0.19
RIMKLA	1p34.2	12.57	9.93	13.99	9.93	10.06	9.92	9.13	6.4	21.6	13.6	6.9	21.93	23.17	3.25	13.83	9.75	1.01	7.72	0.01	0	0.1	0	0	0	0	0	0	0	0	0	0	0	0	0	0	0
ZMYND12	1p34.2	12.64	9.93	14.19	10.26	10.06	9.92	9.32	6.4	21.6	13.6	6.9	21.93	23.17	3.25	13.83	9.75	1.01	7.72	0.06	0.25	0	0.33	0	0	0	0	0.19	0	0	0	0.24	0	0	0	0	0
CCDC30	1p34.2	8.75	8.44	10.11	7.28	6.71	4.58	7.98	5.07	14.01	10.88	6.19	11.87	13.41	2.24	6.6	8.16	2.21	7.72	0.08	0	0	0	0.2	0	0	0	0.19	0	0.18	0	0.24	0.2	0	0.23	0	0
PPIH	1p34.2	7.98	6.45	9.23	7.28	6.71	3.82	7.22	3.47	12.65	10.57	5.13	12.27	11.95	0.41	9.36	6.12	0.6	6.21	0.02	0	0	0	0	0	0.19	0	0	0	0	0	0	0	0	0	0	0.19
YBX1	1p34.2	9.09	7.2	10.01	8.28	8.88	4.33	7.6	4	14.79	11.48	5.66	13.68	12.93	0.41	11.06	7.03	0.8	6.59	0	0	0	0	0	0	0	0	0	0	0	0	0	0	0	0	0	0
CLDN19	1p34.2	10.73	11.91	11.95	9.93	9.66	6.36	9.7	6.93	17.32	11.18	7.26	15.49	16.59	2.64	12.13	7.48	0.8	7.53	0.08	0	0.19	0.33	0	0	0	0	0	0.3	0	0	0	0.2	0.21	0	0.2	0
LEPRE1	1p34.2	10.65	11.66	11.95	9.93	9.47	6.36	9.7	6.93	17.32	10.88	7.26	15.49	16.1	2.44	11.91	7.48	0.8	7.53	0.19	0.5	0.19	0.33	0	0	0	0	0.39	0.3	0.18	0.2	0.24	0	0.21	0.23	0.2	0.19
C1orf50	1p34.2	10.93	11.66	12.24	9.93	9.86	6.87	9.7	7.2	17.7	11.18	7.26	16.7	16.1	2.64	12.13	7.71	0.8	7.72	0.11	0	0.1	0	0	0.51	0.19	0	0.19	0	0.18	0	0.24	0.41	0	0.23	0	0
CCDC23	1p34.2	12.61	11.66	11.47	11.26	11.64	7.12	10.27	7.47	20.04	13.9	8.67	20.32	22.2	3.86	11.28	9.07	0.8	7.34	0.01	0	0	0	0	0	0.19	0	0	0	0	0	0	0	0	0	0	0
ERMAP	1p34.2	12.16	11.17	11.18	11.26	10.65	6.11	9.7	7.47	19.07	13.9	8.5	19.72	20	3.66	11.06	8.84	0.8	7.16	0.06	0	0.1	0.33	0.2	0.25	0	0	0	0	0	0	0.24	0	0	0	0.2	0
ZNF691	1p34.2	12.16	11.17	11.18	11.26	10.65	6.11	9.7	7.47	19.07	13.9	8.5	19.72	20	3.66	11.06	8.84	0.8	7.16	0.1	0.5	0	0	0.2	0.51	0	0	0	0	0.35	0	0	0	0.21	0	0	0.38
SLC2A1	1p34.2	8.15	7.44	8.94	6.29	8.48	5.09	8.17	4.27	13.04	10.57	5.49	13.48	9.76	2.44	6.38	5.67	2.01	5.08	0.05	0.25	0.1	0	0	0	0	0.27	0	0	0.18	0	0.24	0	0	0	0	0
EBNA1BP2	1p34.2	7.06	7.44	8.26	8.61	5.52	4.58	5.51	5.6	11.28	4.83	6.37	11.07	11.46	1.42	7.87	5.44	0.6	5.27	0.02	0	0	0	0	0	0	0	0	0	0	0	0.24	0	0	0	0	0
TIE1	1p34.2	13.93	14.14	12.54	12.58	11.05	8.65	12.36	6.67	22.18	13.29	13.81	22.74	22.44	3.86	15.96	13.83	0.8	9.04	0.41	0.25	0.39	0.33	0.39	0.25	0.38	0	0.58	0.3	0.35	0.6	0.49	1.02	0.21	0.91	0.4	0.38
MPL	1p34.2	14.45	15.38	13.22	13.25	11.44	8.65	12.55	6.67	22.96	13.6	13.98	24.14	24.39	3.86	15.96	13.83	1.01	9.79	0.3	0.25	0.39	0	0.2	0.51	0.19	0.53	0.19	0.3	0.35	0	0.24	0.61	0.21	0	0.2	0.56
CDC20	1p34.2	14.3	15.38	12.93	13.25	11.44	8.65	11.98	6.67	22.76	13.29	13.81	24.14	24.15	3.66	15.96	13.61	1.01	9.6	0.03	0	0	0	0	0	0.19	0	0	0.3	0	0	0	0	0	0	0	0.19
ELOVL1	1p34.2	13.63	13.9	12.34	12.25	11.24	8.4	11.6	6.4	22.37	12.99	13.1	23.34	23.41	3.05	14.26	12.93	1.01	9.6	0	0	0	0	0	0	0	0	0	0	0	0	0	0	0	0	0	0
MED8	1p34.2	10.48	9.18	10.69	9.6	9.07	6.11	8.37	4.53	16.93	11.18	8.85	17.1	18.05	2.64	9.79	8.39	0.8	7.16	0.07	0.25	0	0	0	0	0.19	0	0	0	0.18	0.2	0	0	0	0	0	0
PTPRF	1p34.2	19.68	20.1	20.8	19.21	17.36	15.52	20.72	15.47	23.54	22.36	18.05	30.58	27.56	8.54	21.7	19.27	2.62	13.18	0.19	0.25	0.29	0.33	0	0.25	0	0.27	0.19	0	0.35	0.4	0	0.2	0	0	0.4	0.19
KDM4A	1p34.1	8.87	7.2	8.45	8.28	8.48	3.56	7.6	4	14.79	9.67	5.84	15.69	14.39	1.42	8.72	9.3	0.8	6.21	0.1	0	0.1	0	0	0	0.19	0.27	0	0	0.18	0	0.49	0	0	0	0.2	0
ST3GAL3	1p34.1	4.9	2.23	5.15	4.97	4.73	0.76	4.56	4.27	7	6.65	3.19	6.64	7.56	0.2	5.32	4.54	0.6	3.2	0.05	0	0.1	0	0	0	0.19	0	0.19	0	0	0.2	0	0	0	0	0	0.19
IPO13	1p34.1	14.24	12.16	16.13	14.57	13.21	10.18	11.22	9.6	20.43	18.13	9.38	21.53	21.22	3.86	14.68	11.56	2.41	11.3	0.05	0	0	0	0	0.51	0	0.53	0	0	0	0	0	0	0.21	0	0	0
DPH2	1p34.1	13.83	12.16	15.65	15.23	12.23	10.18	10.84	8.8	19.46	16.92	9.56	20.52	20.98	3.66	15.11	11.79	1.81	11.68	0.2	0	0.19	0	0.2	0	0.19	0	0.19	0	0	0	0.24	0.2	0.43	0.23	0	1.13
ATP6V0B	1p34.1	13.94	12.16	15.84	15.56	12.62	10.18	11.03	8.8	19.84	16.92	9.56	20.52	21.22	3.66	15.11	11.79	1.81	11.86	0	0	0	0	0	0	0	0	0	0	0	0	0	0	0	0	0	0
B4GALT2	1p34.1	13.63	11.17	15.45	15.56	12.43	10.18	10.46	8	19.65	16.31	9.56	20.32	20.98	3.66	14.89	11.79	1.81	11.49	0.01	0	0	0	0.2	0	0	0	0	0	0	0	0	0	0	0	0	0
CCDC24	1p34.1	13.3	10.92	15.35	15.23	12.23	9.92	10.08	8	19.46	15.11	8.85	19.92	20.73	3.46	14.47	10.88	1.41	11.49	0.06	0	0	0	0	0	0.19	0	0	0	0.35	0	0	0	0	0.23	0.2	0.19
SLC6A9	1p34.1	10.82	8.19	12.93	12.58	10.26	6.36	7.79	6.67	17.32	13.29	6.9	16.1	17.56	3.25	10.64	8.62	1.21	8.85	0.27	0	0.49	0.33	0.39	0.51	0.38	0	0.19	0.6	0.35	0.2	0	0	0.64	0.68	0.2	0.19
KLF17	1p34.1	11.86	11.91	11.76	8.28	10.85	8.14	9.7	4.53	19.84	14.8	8.67	19.52	14.39	1.83	12.98	9.75	0.2	7.72	0.09	0.25	0.19	0	0	0	0.38	0.27	0.19	0	0	0	0	0	0	0	0	0.19
DMAP1	1p34.1	4.03	3.23	5.05	5.3	2.96	2.29	2.47	2.67	5.06	4.23	2.65	5.43	6.83	1.22	2.34	2.95	0.6	3.77	0.04	0	0	0	0	0	0	0	0	0	0	0	0	0.2	0	0.45	0	0
ERI3	1p34.1	0.87	0.5	0.78	0.66	0.99	0	0.76	0	1.36	0	0.71	2.21	1.46	0	0.43	1.13	0.2	0.38	0	0	0	0	0	0	0	0	0	0	0	0	0	0	0	0	0	0
RNF220	1p34.1	1.55	0.74	1.85	1.99	1.58	0.76	0.95	2.13	1.17	0.6	0.89	3.42	2.44	0.41	0.85	2.04	0.2	1.32	0.24	0.25	0	0	0.2	0.51	0.38	0	0	0.91	0.18	0.2	0.49	0.2	0	0.68	0.2	0.56
TMEM53	1p34.1	1.59	0.74	2.04	3.31	1.58	0.76	0.57	2.13	1.17	1.21	0.71	3.02	1.95	0.2	1.28	1.81	0.2	1.32	0.07	0	0	0.33	0	0	0	0	0.39	0	0	0	0	0	0	0	0.2	0
KIF2C	1p34.1	9.29	8.19	10.69	11.26	8.48	7.38	6.27	6.4	10.89	9.37	7.43	13.08	13.66	3.46	9.79	10.88	1.61	6.97	0.11	0.25	0.29	0	0	0	0	0	0.19	0	0.18	0.6	0	0	0	0	0.2	0.19
BEST4	1p34.1	15.75	14.89	17.69	17.55	14.6	11.7	12.74	10.4	18.87	15.41	15.22	23.34	22.2	5.69	18.94	15.87	3.42	11.68	0.21	0.5	0	0.66	0	0	0	0	0.39	0.6	0.53	0	0	0.41	0	0.23	0.2	0.38
PLK3	1p34.1	16.21	15.88	18.37	17.55	15.19	10.94	13.5	10.13	18.87	16.31	16.11	24.14	21.71	5.89	20.21	16.55	3.82	12.43	0	0	0	0	0	0	0	0	0	0	0	0	0	0	0	0	0	0
RPS8	1p34.1	10.61	9.68	12.34	12.25	10.45	9.67	7.98	7.47	11.48	10.27	8.67	15.29	15.61	4.27	11.06	12.24	2.21	7.91	0	0	0	0	0	0	0	0	0	0	0	0	0	0	0	0	0	0
PTCH2	1p34.1	15.12	13.9	16.42	17.22	15.19	10.18	13.31	9.33	17.51	15.71	14.16	23.54	19.02	5.89	18.51	14.74	3.82	11.11	1.14	1.49	1.07	0.99	0	0.76	0.57	0.53	1.75	0.91	0.71	1.41	1.22	0.81	1.28	2.04	1.01	1.69
EIF2B3	1p34.1	8.42	6.7	9.82	8.61	8.88	4.83	6.27	5.33	10.7	9.06	4.6	12.68	11.46	2.24	7.45	6.8	1.21	5.84	0.45	0.25	0.19	0	0.79	0.51	0.95	0.53	0.58	0.6	0.18	0	0.49	0.41	0.64	0.68	0.4	0.38
UROD	1p34.1	6.7	5.96	7	8.94	6.9	2.29	6.08	3.73	9.92	9.06	3.54	10.46	8.29	2.03	6.81	5.67	0.2	4.71	0.42	0.5	0.29	0.33	0.59	0.51	0.76	0.53	0.78	0	0	0.2	0.24	0.61	0.85	0.23	0.6	0.38
HPDL	1p34.1	6.6	3.23	7.58	7.28	7.1	3.31	5.7	4.27	10.7	7.85	4.42	11.67	10.98	1.83	4.68	5.44	0.8	3.58	0.02	0	0	0	0.2	0	0	0	0	0	0	0	0	0	0	0.23	0	0
MUTYH	1p34.1	6.6	3.23	7.58	7.28	7.1	3.31	5.7	4.27	10.7	7.85	4.42	11.67	10.98	1.83	4.68	5.44	0.8	3.58	0.68	0.5	0.39	0.33	0.79	0.51	0.38	1.33	0.78	0.3	1.24	0.8	0.98	0.61	0.43	0.91	0.2	0.75
TOE1	1p34.1	6.6	3.23	7.58	7.28	7.1	3.31	5.7	4.27	10.7	7.85	4.42	11.67	10.98	1.83	4.68	5.44	0.8	3.58	0.08	0	0	0	0.2	0.25	0	0	0	0	0	0	0	0	0	0.23	0.4	0.19
PRDX1	1p34.1	5.46	3.47	5.83	3.31	5.33	4.33	4.18	3.73	9.14	1.81	5.13	10.66	9.76	1.22	5.74	6.12	0.6	3.2	0.05	0	0	0.33	0	0.25	0	0.27	0	0	0	0	0	0	0	0.23	0	0
AKR1A1	1p34.1	8.55	6.45	9.43	5.63	7.69	6.11	6.65	5.07	15.37	6.65	7.26	16.1	14.15	1.63	8.94	8.16	1.41	5.08	0.06	0	0	0.33	0	0.25	0.19	0	0	0	0	0	0	0	0	0.23	0	0.38
NASP	1p34.1	13.59	13.15	14.77	12.58	11.05	8.14	11.03	8	20.04	13.29	11.15	20.72	22.44	5.08	15.96	12.47	3.22	9.23	0.49	0.5	0.49	0.66	0.2	0.51	0.76	0.53	0.78	0	0.18	0	0.49	1.42	0.43	0.45	0.8	0.38
GPBP1L1	1p34.1	14.33	13.4	15.16	13.91	11.83	8.91	10.84	8.27	20.82	14.5	12.57	22.54	23.41	5.08	17.45	12.24	3.02	8.85	0.01	0	0	0	0	0	0	0	0	0	0	0.2	0	0	0	0	0	0
IPP	1p34.1	5.83	5.71	5.93	5.96	4.73	1.02	4.75	3.2	8.95	5.74	4.42	8.65	10.24	1.42	6.6	5.9	1.01	3.77	0.32	0.25	0.1	0.33	0.39	0.51	0.19	0.27	0.58	0.6	0	0.4	0.24	0.81	0.64	0.68	0.4	0
PIK3R3	1p34.1	4.85	3.97	4.28	2.32	3.35	1.53	3.42	4	8.75	4.83	4.25	8.25	7.32	1.02	5.96	4.08	0.8	3.58	0.32	0.74	0.39	0	0	0	0.38	0.53	0	0	0.53	0	0.49	0.41	0.21	0.23	1.21	0.19
TSPAN1	1p34.1	9.74	7.44	11.47	8.94	8.28	5.09	9.13	5.87	12.45	9.06	8.32	17.51	12.44	2.64	10.21	10.88	2.62	6.4	0.13	0	0.1	0	0.2	0.25	0.19	0.27	0.19	0	0.35	0.2	0.24	0	0	0.23	0	0.19
POMGNT1	1p34.1	10.01	7.94	11.95	9.27	8.28	5.09	9.13	6.13	13.42	9.37	8.32	18.11	13.66	2.64	10.21	10.88	2.82	6.4	0.34	0.25	0.29	0	1.38	0.76	0.19	0	0.39	0	0.71	0.6	0.24	0	0.21	0	0.8	0.19
RAD54L	1p34.1	4.58	4.47	5.34	3.97	2.76	3.05	4.37	2.67	6.23	4.53	1.24	6.84	8.78	1.42	4.68	3.63	0.8	3.2	0.6	0.99	0.68	1.32	0.59	0.51	0.38	0	0.78	0.3	0.18	0.4	0.98	0.41	1.28	0.45	0.2	0.94
LRRC41	1p34.1	7.47	7.94	7.77	6.95	5.13	5.09	6.84	3.47	11.09	5.14	4.42	11.67	14.15	2.64	7.23	5.67	1.61	4.14	0.03	0	0	0	0	0	0	0.27	0	0	0	0.2	0	0.2	0	0	0	0
UQCRH	1p34.1	14.15	13.9	14.48	10.6	12.03	9.67	13.12	6.4	22.96	10.27	11.15	25.55	23.9	4.88	15.32	11.11	1.81	7.91	0.02	0	0	0	0	0	0	0.27	0	0	0	0	0	0	0	0	0	0
NSUN4	1p33	13.48	13.4	13.41	10.6	11.05	8.65	12.55	6.67	23.15	10.27	11.15	23.94	21.95	4.67	15.96	10.43	1.21	6.78	0.1	0	0.19	0	0.2	0	0	0	0.19	0	0	0	0.24	0.2	0	0.23	0	0
FAAH	1p33	9.61	7.44	8.94	6.29	8.88	7.38	9.51	6.4	18.87	6.34	6.9	14.49	15.12	2.64	12.34	7.94	0.6	5.27	0.13	0.5	0	0	0.59	0.25	0.19	0	0	0	0	0	0	0	0	0	0	0.19
DMBX1	1p33	4.63	2.98	4.47	5.96	4.93	2.8	3.23	1.6	8.37	7.25	3.72	7.44	5.12	1.42	2.77	4.76	0.2	2.82	0.21	0.25	0	0	0.39	0	0	0.27	0	0.3	0.53	0.4	0	0.2	0.21	0.23	0.2	0.38
MKNK1	1p33	1.44	1.24	1.36	0.99	1.78	1.27	1.52	0.27	2.14	2.11	0.71	3.82	0.24	0	0.85	1.36	0	0.38	0.04	0	0	0	0	0.25	0.19	0	0	0	0.18	0	0	0	0	0	0	0
ATPAF1	1p33	1.17	0.74	1.65	2.32	0.99	0.51	0.38	1.6	0.78	4.23	0.89	0.8	1.46	0	0.43	1.13	0.4	1.13	0.02	0	0	0	0.2	0.25	0	0	0	0	0	0	0	0	0	0	0	0
CYP4B1	1p33	9.75	7.44	9.33	9.93	8.68	8.4	8.94	5.6	15.18	10.57	9.2	16.5	13.41	2.64	12.34	9.98	1.01	6.03	0.43	0	0.39	0.33	0.59	0.51	0.57	0	0.39	0.3	0.53	0.4	0.49	0.2	0.21	0.23	1.01	0.75
CYP4A11	1p33	7.22	5.21	8.45	6.95	7.69	4.07	5.7	3.73	10.89	10.57	5.13	11.87	10.73	1.22	5.53	7.48	0.6	3.39	0.21	0.25	0.1	0.99	0.39	0	0.57	0.27	0	0	0.18	0.2	0	0.2	0.21	0.23	0.2	0.38
CYP4X1	1p33	5.75	3.97	7.29	5.96	7.89	2.29	3.04	3.73	8.56	7.25	4.6	10.46	8.05	1.02	5.32	2.72	0	3.95	0.19	0	0	0.66	0.2	0	0.38	0	0.19	0.6	0	0.2	0.24	0	0	0.45	0	0.56
CYP4Z1	1p33	11.48	9.93	13.8	11.26	12.62	7.89	9.51	8.8	15.56	11.48	9.73	18.31	12.68	2.44	11.91	9.3	3.22	8.47	0.06	0	0.1	0	0.2	0	0	0	0	0	0.18	0	0	0	0.21	0	0.2	0
CYP4A22	1p33	14.36	14.39	16.62	14.9	11.24	9.67	11.98	10.67	17.51	14.8	13.63	22.33	15.37	5.08	16.81	13.38	4.83	9.42	0.05	0	0.19	0	0	0	0.19	0	0	0.3	0	0	0	0	0	0	0	0.19
PDZK1IP1	1p33	12.06	11.17	13.22	13.91	10.06	7.12	9.51	8.27	15.37	12.99	11.15	19.32	11.95	4.27	14.47	12.24	3.22	7.53	0.02	0.25	0	0	0	0	0	0	0	0	0	0.2	0	0	0	0	0	0
TAL1	1p33	8.65	7.94	7.87	9.27	5.52	4.07	8.17	3.2	16.54	7.25	7.26	17.1	12.44	1.83	10.21	7.03	0.4	4.71	0.05	0	0	0	0	0	0	0.27	0.19	0	0	0	0	0	0.21	0	0.2	0
STIL	1p33	11.29	11.66	10.2	12.91	7.89	5.85	10.08	4.27	20.62	11.48	9.03	19.52	14.88	1.83	14.26	9.52	0.6	7.72	0.02	0	0.1	0	0	0	0	0	0	0	0	0	0	0	0	0.23	0	0
CMPK1	1p33	1.72	1.99	1.46	1.99	2.37	0.51	2.09	1.6	2.72	2.11	1.06	3.42	1.71	0	0.85	1.13	0	1.51	0.01	0	0	0	0	0	0	0	0	0	0	0	0	0	0	0	0.2	0
FOXD2	1p33	0	0	0	0	0	0	0	0	0	0	0	0	0	0	0	0	0	0	0	0	0	0	0	0	0	0	0	0	0	0	0	0	0	0	0	0
SLC5A9	1p33	10.02	10.42	8.55	12.91	9.07	5.34	10.08	6.13	16.34	8.76	8.5	17.91	16.34	3.25	11.49	8.16	0.6	6.78	0.76	0.99	0.78	0	0.59	0.51	1.14	0.27	1.17	0.3	0.71	0.6	0.73	1.42	1.28	0.91	0.6	0.94
SPATA6	1p33	4.96	4.22	5.05	4.3	3.35	3.56	1.71	1.87	7.78	7.85	3.19	8.65	8.54	1.63	5.11	4.76	0.2	2.64	0.06	0	0.19	0	0	0	0.19	0.27	0	0	0.18	0	0	0	0	0	0	0.19
BEND5	1p33	0.2	0	0.19	0.99	0.2	0.25	0.19	0	0.19	0	0.35	0	0.24	0	0.64	0.23	0	0	0.01	0	0	0	0	0	0	0	0	0	0	0	0.24	0	0	0	0	0
ELAVL4	1p33	3.93	2.23	5.64	2.65	3.75	1.27	3.23	2.67	4.86	6.34	2.65	6.84	6.83	0.41	3.4	3.17	0.2	1.88	0	0	0	0	0	0	0	0	0	0	0	0	0	0	0	0	0	0
FAF1	1p32.3	3.93	4.47	4.66	3.64	1.97	3.05	3.04	2.93	8.75	3.32	1.95	6.44	6.83	1.02	3.83	2.49	0	2.64	0.01	0	0	0	0	0	0	0	0	0	0	0	0	0.2	0	0	0	0
CDKN2C	1p32.3	1.35	1.24	0.97	1.66	1.18	0.76	0.95	0.53	3.11	1.51	0.89	2.01	1.71	0.61	1.7	1.36	0	0.19	0.04	0	0	0	0	0	0	0	0.19	0	0	0	0	0	0.43	0	0.2	0
RNF11	1p32.3	0.06	0	0	0	0	0	0	0	0.19	0	0.35	0	0	0	0	0	0	0	0	0	0	0	0	0	0	0	0	0	0	0	0	0	0	0	0	0
EPS15	1p32.3	8.94	7.44	9.33	7.62	9.66	4.58	9.51	4.8	16.54	4.83	7.43	17.3	14.39	2.44	9.36	5.9	1.21	3.95	0.03	0	0	0	0	0	0.19	0.27	0	0	0	0	0	0	0	0	0	0.19
OSBPL9	1p32.3	1.26	0.5	1.94	1.99	0.2	1.27	0.19	0.8	3.11	0.91	0.89	1.01	2.93	0.41	1.06	0.45	0	1.13	0.06	0.25	0	0	0	0.25	0	0	0	0	0	0.2	0	0	0	0	0.2	0
NRD1	1p32.3	13.1	12.41	13.41	13.25	11.44	6.62	11.22	5.33	19.26	11.18	13.1	22.54	20	4.47	12.98	12.47	2.21	7.16	0.12	0.25	0.1	0	0	0	0	0.27	0	0	0.35	0.2	0	0.2	0.43	0	0	0.19
RAB3B	1p32.3	1.67	1.24	1.85	2.32	1.78	1.02	1.9	1.07	2.92	0.91	1.42	2.01	2.93	0.41	1.28	0.91	0.2	1.88	0.07	0.25	0	0	0	0.25	0	0	0	0	0.35	0	0	0.2	0	0	0.2	0.19
TXNDC12	1p32.3	3.3	2.73	3.01	4.3	2.76	2.29	2.47	1.87	6.03	3.63	2.48	6.44	5.37	1.02	2.98	2.95	0.4	3.77	0.02	0	0	0	0	0.25	0	0	0	0	0	0	0	0	0	0	0	0
KTI12	1p32.3	3.29	2.48	3.01	4.3	2.76	2.29	2.47	1.87	6.03	3.63	2.48	6.44	5.37	1.02	2.98	2.95	0.4	3.77	0.09	0	0.29	0	0	0	0.19	0.27	0	0	0	0.4	0	0	0	0	0	0.38
BTF3L4	1p32.3	3.29	2.73	3.01	4.3	2.76	2.04	2.47	1.87	6.03	3.63	2.48	6.44	5.37	1.02	2.98	2.95	0.4	3.77	0	0	0	0	0	0	0	0	0	0	0	0	0	0	0	0	0	0
ZFYVE9	1p32.3	2.47	0.74	2.53	1.66	1.38	2.04	1.9	1.87	6.03	4.83	2.12	4.63	4.39	1.22	1.28	1.36	0.2	1.32	0.04	0	0	0	0	0	0.19	0	0	0	0.18	0	0	0	0	0	0	0.19
CC2D1B	1p32.3	5.39	2.73	5.93	5.63	3.55	4.33	4.18	5.87	8.37	5.44	4.96	9.05	10.98	1.02	4.04	3.17	0.6	4.52	0.11	0	0	0	0	0	0.19	0	0.39	0.3	0.18	0	0.49	0	0.21	0	0	0
ORC1	1p32.3	9.1	7.44	10.5	9.93	6.71	6.62	6.84	6.93	13.04	8.16	8.67	13.28	17.32	3.05	7.23	6.8	2.01	6.59	0.35	0.25	0.58	0.33	0.2	0.25	0.57	0.53	0	0.3	0.18	0.2	0	0.41	1.06	0.91	0.2	0.56
PRPF38A	1p32.3	8.34	7.44	9.23	8.94	5.92	6.36	6.65	6.4	12.26	6.95	7.79	12.27	15.12	2.64	6.38	6.35	1.81	6.78	0	0	0	0	0	0	0	0	0	0	0	0	0	0	0	0	0	0
ZCCHC11	1p32.3	5.83	3.72	6.8	5.63	4.54	2.29	5.51	2.67	8.37	6.04	4.25	10.46	9.51	2.85	4.89	5.67	0.2	3.01	0.08	0	0	0	0.2	0	0.19	0.27	0	0	0	0.2	0	0	0	0	0.2	0.19
GPX7	1p32.3	2.75	4.71	2.62	1.32	1.97	2.54	1.71	1.07	3.7	3.63	2.12	4.83	4.15	0.61	3.19	2.72	0.2	0.56	0.05	0	0.1	0	0	0.25	0	0	0.39	0	0	0	0	0	0	0	0	0
ZYG11B	1p32.3	4.53	3.72	4.66	1.99	3.55	2.8	5.13	3.2	8.56	3.93	3.89	7.65	5.37	1.42	3.83	3.85	0	2.26	0.01	0	0	0	0	0	0	0	0	0.3	0	0	0	0	0	0	0	0
ECHDC2	1p32.3	1.8	0.74	2.43	2.65	2.56	0.76	1.33	0.53	2.33	2.42	1.59	2.41	2.68	0.61	1.28	2.27	0.2	1.88	0.21	0	0	0.33	0.2	0.25	0.38	0.53	0	0.6	0.18	0.2	0	0	0.21	0	0.2	0.38
SCP2	1p32.3	4.42	3.72	5.64	6.29	4.93	2.54	4.18	2.67	6.23	5.44	3.36	4.83	7.07	1.83	2.55	3.85	0.4	4.71	0.25	0.5	0.58	0.66	0	0	0.19	0	0.58	0	0	0.2	0.24	0	0.43	0.68	0.2	0
PODN	1p32.3	13.29	13.9	13.12	15.56	12.03	8.65	10.46	8	21.79	13.9	12.39	16.9	16.83	5.08	13.62	12.47	2.01	7.72	0.05	0	0.1	0	0.2	0	0	0	0	0	0	0	0	0.2	0	0	0.2	0.19
SLC1A7	1p32.3	14.86	15.38	14.97	17.88	11.44	9.92	12.55	9.07	23.35	16.62	13.1	18.91	19.02	6.3	15.32	14.06	3.42	8.1	0.21	0.25	0.19	0.33	0.2	0	0.19	0	0	0.6	0.35	0.4	0	0	0	0.23	0.2	0.19
CPT2	1p32.3	13.55	15.14	12.73	11.92	14	8.65	11.03	8.27	19.46	12.99	13.45	21.73	22.93	4.47	15.53	12.93	1.81	6.4	0.93	0.5	0.58	1.32	1.78	0.76	0.95	0.53	0.97	0.91	0.89	2.01	0.73	1.42	1.06	0.91	1.01	0.19
C1orf123	1p32.3	14.66	16.13	14.29	14.57	14.79	9.92	12.17	9.07	20.62	13.6	14.34	23.14	24.15	4.67	15.96	14.51	1.81	6.97	0.12	0.74	0.1	0.33	0	0	0	0	0	0	0.35	0	0	0	0	0.45	0	0.38
MAGOH	1p32.3	14.73	16.13	14.48	14.57	14.79	10.18	12.17	9.07	20.82	13.6	14.34	23.54	24.15	4.67	15.96	14.51	1.81	6.97	0	0	0	0	0	0	0	0	0	0	0	0	0	0	0	0	0	0
LRP8	1p32.3	10.11	10.67	9.82	8.28	7.89	6.36	8.56	6.4	17.7	10.88	8.67	16.7	12.68	2.85	10.64	8.16	0.8	3.39	0.74	0.25	0.58	0.99	1.18	0.51	0.38	1.07	0.58	0	0.71	1.01	0.49	1.22	0	1.13	1.01	0.56
DMRTB1	1p32.3	1.17	0.99	1.17	0.99	0.59	0.25	1.14	0.27	1.17	0.91	1.06	2.41	1.71	0.61	1.28	1.81	0	1.13	0	0	0	0	0	0	0	0	0	0	0	0	0	0	0	0	0	0
GLIS1	1p32.3	3.33	2.73	3.21	2.65	3.35	0.51	3.42	1.33	6.03	4.23	3.01	6.24	1.95	1.22	3.4	4.54	0	1.13	0.12	0	0.19	0	0.2	0	0.19	0.27	0	0.3	0	0	0	0.2	0	0.23	0.2	0.38
YIPF1	1p32.3	13.28	14.14	12.34	14.57	12.23	7.38	11.03	7.2	21.4	11.78	9.38	23.74	21.22	4.27	12.77	11.79	1.61	5.65	0.04	0.25	0	0	0	0.25	0	0	0	0	0	0	0	0	0	0.23	0	0
DIO1	1p32.3	13.31	14.14	12.44	14.57	12.43	7.38	11.03	7.2	21.4	11.78	9.38	23.74	21.22	4.27	12.77	11.79	1.61	5.84	0.04	0	0.1	0	0	0	0	0	0	0.3	0	0.2	0	0	0	0	0	0
LRRC42	1p32.3	9.12	7.69	9.82	8.61	9.86	4.33	7.41	4.53	14.01	7.55	6.9	15.09	13.41	2.85	8.94	7.71	1.61	5.46	0.1	0	0.29	0	0.2	0	0	0	0.39	0	0.18	0	0.24	0.2	0	0	0	0
LDLRAD1	1p32.3	4.59	4.47	5.83	4.3	3.35	2.04	2.47	2.93	7.39	3.63	3.89	5.63	6.83	2.44	3.19	3.4	1.41	2.64	0.12	0.25	0.19	0	0	0.25	0.57	0	0.19	0	0.35	0	0	0.2	0	0	0	0
TMEM59	1p32.3	2.34	2.23	2.43	2.65	1.18	1.27	0.76	1.07	4.09	2.42	1.24	3.42	3.9	1.02	1.7	1.36	0.6	0.75	0.17	0.25	0.19	0	0.39	0	0	0	0.39	0	0.53	0	0.49	0.2	0	0	0	0.19
CDCP2	1p32.3	1.86	1.24	2.53	2.98	0.99	1.78	2.09	0.8	2.14	1.81	0.89	2.82	2.2	0.81	1.7	0.68	0.2	0.56	0.04	0	0	0	0	0	0.19	0	0	0.3	0	0.2	0	0	0	0	0	0
MRPL37	1p32.3	10.69	11.66	9.52	9.27	8.09	6.62	9.51	5.6	18.87	13.6	7.08	17.1	17.56	2.85	9.36	9.75	0.4	5.27	0.06	0	0	0.33	0	0	0.19	0.27	0	0	0	0	0	0.2	0.21	0	0	0
SSBP3	1p32.3	1.25	1.24	1.94	0.66	1.58	0.51	0.95	0.53	2.14	0.6	0.89	2.41	0.98	0	0.64	0.91	0	1.32	0	0	0	0	0	0	0	0	0	0	0	0	0	0	0	0	0	0
ACOT11	1p32.3	9.37	9.18	11.27	11.26	6.51	6.11	7.98	6.67	12.45	11.48	9.03	12.27	13.17	1.83	8.3	9.3	1.81	6.03	0.25	0.25	0.29	0	0.2	0.25	0.57	0.27	0	0.3	0.35	0.2	0.49	0	0	0.23	0.4	0.75
FAM151A	1p32.3	9.37	9.18	11.27	11.26	6.51	6.11	7.98	6.67	12.45	11.48	9.03	12.27	13.17	1.83	8.3	9.3	1.81	6.03	0.12	0	0	0.33	0	0.25	0.38	0	0.19	0	0	0.4	0.49	0	0	0.23	0	0.19
TTC4	1p32.3	8.94	7.44	9.62	8.28	7.1	4.83	9.13	4	13.62	9.97	5.49	15.69	14.15	3.66	10.21	7.94	1.41	4.14	0.06	0	0	0	0	0	0	0	0.19	0	0.35	0	0	0	0	0	0	0
C1orf177	1p32.3	13.62	13.65	15.16	14.9	12.43	6.87	13.69	8.27	19.07	15.41	11.86	18.91	19.76	3.86	12.55	14.29	1.61	7.91	0.07	0	0.19	0	0	0.25	0	0	0	0	0.18	0	0	0.2	0	0.45	0	0
PARS2	1p32.3	13.84	12.9	14.09	14.9	12.23	6.87	12.74	6.13	21.6	15.71	9.56	22.33	22.93	5.08	14.47	12.93	1.81	6.97	0.14	0.25	0.1	0	0.39	0	0.38	0	0.19	0	0	0.4	0.24	0	0.21	0	0	0.19
TTC22	1p32.3	13.09	12.9	13.41	15.89	11.05	6.62	12.74	6.67	19.84	14.8	10.27	19.92	18.29	3.86	13.4	12.47	2.21	9.04	0	0	0	0	0	0	0	0	0	0	0	0	0	0	0	0	0	0
DHCR24	1p32.3	7.04	6.2	7.48	4.3	7.1	3.56	7.79	4	12.45	10.27	5.84	11.07	9.76	1.83	6.38	7.94	1.01	1.88	0.65	0.25	0.68	0.66	1.18	0	1.14	0.27	1.17	0.6	0.89	1.01	1.22	0.61	0.43	0.23	0.8	0.38
TMEM61	1p32.3	7.28	5.71	8.07	5.3	7.1	5.6	4.56	5.87	11.67	9.06	4.78	10.87	10.49	2.24	4.89	5.67	0.8	5.08	0.02	0	0	0	0	0	0	0	0	0	0.18	0	0.24	0	0	0	0	0
BSND	1p32.3	11.01	9.18	10.59	13.25	9.47	7.38	6.46	8	18.09	12.39	8.5	16.1	14.88	3.86	9.36	8.84	1.01	6.78	0.17	0	0.19	0	0.2	0	0.19	0.53	0.39	0	0.35	0	0.24	0.41	0	0	0	0
PCSK9	1p32.3	10.62	10.42	9.72	12.25	9.66	7.89	7.98	6.67	17.7	9.37	8.85	14.49	16.83	3.46	10.85	8.16	1.21	6.4	0.22	0.25	0.39	0	0.39	0.25	0	0.27	0.19	0.6	0	0.4	0	0.2	0.21	0.45	0.4	0.19
PPAP2B	1p32.2	2.14	1.74	2.82	1.99	1.38	1.53	2.09	1.33	3.11	2.11	1.59	1.21	3.41	1.22	3.19	2.27	0	1.88	0.03	0	0	0	0.2	0	0	0	0	0	0	0	0	0.2	0	0	0.2	0
PRKAA2	1p32.2	7.28	4.71	7.39	8.28	5.52	4.07	7.03	5.07	12.45	8.76	4.07	10.46	9.76	2.64	7.87	7.03	0.6	4.52	0.02	0	0.1	0	0	0	0	0.27	0	0	0	0	0	0	0	0	0	0
C1orf168	1p32.2	15.17	13.4	15.16	18.21	13.41	10.43	11.6	9.33	21.79	16.01	12.57	20.52	22.44	7.11	15.96	12.24	3.02	10.17	0.19	0	0.1	0.66	0	0	0	0	0.19	0	0	0	1.22	0.41	0.21	0.45	0.4	0.19
C8A	1p32.2	8.62	8.19	10.3	11.59	8.88	6.62	6.08	5.33	14.2	7.55	6.9	13.08	12.44	1.83	7.66	8.62	2.21	5.08	0.46	0.99	0.29	0.33	0.2	0.25	0.38	0.8	0.78	0.3	0.71	0.2	0.24	1.22	0.21	0.45	0.6	0
C8B	1p32.2	9.29	7.44	10.69	9.27	9.27	5.34	7.41	5.33	13.23	8.16	8.85	17.51	13.9	3.25	10.85	7.26	0.4	4.52	0.5	0.25	0	0	0.2	0.76	0.38	0.27	0.58	0.6	0.35	0.4	0.98	0.41	1.06	0.23	1.01	0.38
DAB1	1p32.2	2.92	1.99	3.89	1.66	2.76	2.54	1.9	2.13	5.06	2.11	2.48	3.62	5.61	0.41	1.91	2.27	0.4	1.88	0.01	0	0	0	0	0	0	0	0.19	0	0	0	0	0	0	0	0	0
OMA1	1p32.2	7.14	5.71	7.97	8.61	8.48	4.07	5.13	3.47	10.51	6.95	6.73	12.27	10.24	2.24	7.02	7.26	1.01	4.14	0.09	0.25	0	0	0	0	0.19	0	0.19	0	0.18	0.4	0	0	0.21	0	0	0.19
JUN	1p32.1	1.35	0.99	1.46	1.99	1.18	1.02	1.14	0.53	1.75	0.91	1.42	3.42	1.22	0.2	1.06	1.36	0	1.13	0	0	0	0	0	0	0	0	0	0	0	0	0	0	0	0	0	0
FGGY	1p32.1	9.34	9.43	10.01	11.26	8.88	4.33	7.98	5.33	13.81	10.27	6.73	14.89	11.95	4.88	6.81	9.3	1.61	5.65	0.39	0.74	0.39	0.33	0.39	0.25	0	0.27	0	0.3	0.53	0.2	0	0.61	0.43	0.23	0.8	0.38
CYP2J2	1p32.1	3.79	2.23	3.3	3.31	4.73	1.27	3.04	1.87	6.42	3.63	2.12	6.44	4.88	0.81	3.4	3.4	0.2	1.51	0.41	0.5	0.19	0	0	0.51	0.38	1.07	0.39	0.3	0.89	0.4	0.49	0.61	0.43	1.13	0.2	0.19
C1orf87	1p32.1	10.55	9.43	10.98	11.92	11.24	5.09	8.75	5.33	17.7	12.08	6.55	14.08	13.66	4.67	12.55	10.2	2.41	6.03	0.08	0	0.1	0	0	0	0	0.27	0	0.6	0.18	0.2	0	0.2	0	0.23	0	0
NFIA	1p31.3	8.92	7.44	8.65	10.6	7.3	5.34	4.75	2.93	16.15	12.99	6.19	14.89	13.17	3.66	10.21	7.26	0.2	3.58	0	0	0	0	0	0	0	0	0	0	0	0	0	0	0	0	0	0
INADL	1p31.3	26.11	30.27	25.95	25.5	23.27	16.54	24.71	13.07	35.8	22.36	26.02	40.85	36.59	11.99	27.45	25.85	6.04	16.76	0.29	0.25	0.39	0.66	0.2	0	0.19	0.27	0.58	0.3	0	0.2	0.49	0	0.21	0.91	0.2	0.38
KANK4	1p31.3	18.21	18.36	18.95	18.54	16.96	15.01	16.73	10.93	25.68	17.22	20	29.78	24.88	8.94	17.23	15.65	3.02	13.94	0.1	0.25	0.1	0	0.2	0	0	0	0	0	0.18	0.2	0	0	0.43	0.23	0.2	0
USP1	1p31.3	1.23	0.99	2.04	2.65	1.38	0.51	0.95	0.8	1.56	0.91	1.06	1.81	1.22	0	1.28	0.23	0.2	0.56	0.07	0.25	0	0	0.39	0.25	0	0	0	0	0	0	0.24	0.2	0.21	0	0	0
DOCK7	1p31.3	11.65	9.93	12.73	9.6	11.44	6.11	8.56	5.87	18.29	11.18	10.44	21.13	16.83	4.67	11.49	11.79	1.81	7.16	0.1	0	0.1	0	0.2	0.25	0.19	0.27	0	0	0	0.2	0.24	0	0.21	0	0.2	0
ANGPTL3	1p31.3	0.77	0	0.68	0.99	1.78	0.76	0	1.07	1.17	1.81	0.53	1.21	0.98	0.2	0.21	1.13	0	0.19	0.2	0	0	0	0	0.25	0.76	0.27	0.39	0	0.18	0.4	0.73	0	0	0	0.4	0.19
ATG4C	1p31.3	3.24	1.24	3.5	2.65	4.34	2.04	2.47	2.13	5.64	1.81	2.65	3.42	3.41	0.81	3.4	2.95	1.01	2.07	0.15	0	0.19	0	0.2	0	0.19	0	0.39	0	0	0	0.24	0.2	0.43	0	0.4	0
FOXD3	1p31.3	0.03	0	0	0	0	0	0	0	0.39	0	0	0	0	0	0	0	0	0	0	0	0	0	0	0	0	0	0	0	0	0	0	0	0	0	0	0
ALG6	1p31.3	8.01	6.2	7.77	6.95	8.48	4.83	6.84	4.8	12.84	7.55	6.19	13.08	8.78	3.05	10.64	6.58	1.21	5.08	0.25	0.25	0.49	0.66	0.39	0.25	0.38	0.27	0.19	0	0	0.2	0	0	0.64	0.45	0.4	0
ITGB3BP	1p31.3	9.01	9.68	9.14	9.6	7.69	5.34	8.37	3.73	15.18	8.76	7.08	14.49	10.73	3.25	10.64	6.8	0.6	4.9	0.04	0	0	0	0	0	0	0	0.19	0	0	0.2	0	0.2	0	0	0	0
EFCAB7	1p31.3	11.56	12.66	12.15	11.26	10.06	6.62	10.27	7.2	16.15	12.99	9.91	17.3	15.37	5.08	12.55	11.34	2.62	6.4	0.15	0.25	0.29	0	0.2	0	0	0	0.19	0	0.18	0.4	0.24	0.2	0	0.23	0	0
PGM1	1p31.3	12.74	10.17	14.48	11.26	11.64	9.16	11.41	7.47	18.29	12.69	11.86	18.91	18.29	5.49	13.62	12.02	1.81	6.4	0.03	0	0	0	0	0.25	0	0.27	0	0	0	0	0	0	0	0	0	0
ROR1	1p31.3	9.81	7.2	10.11	6.95	8.88	4.83	9.13	4.53	18.48	10.27	6.55	17.1	13.9	4.27	10.43	8.39	0.2	4.52	0.16	0.5	0.29	0	0	0	0.19	0	0.19	0.3	0.18	0	0	0.2	0.21	0.45	0	0.19
UBE2U	1p31.3	6.23	3.23	6.51	4.64	6.31	2.54	4.94	3.47	11.28	6.34	4.42	9.26	8.78	2.85	5.74	6.58	0.2	3.2	0.03	0	0	0	0	0.25	0	0	0	0	0	0	0.24	0	0	0	0	0
CACHD1	1p31.3	6.62	6.45	8.65	7.28	5.92	3.56	3.61	2.93	9.53	7.55	5.13	9.05	7.56	2.85	4.89	8.62	0.6	3.95	0.01	0	0.1	0	0	0	0	0	0	0	0	0	0	0	0	0	0	0
AK4	1p31.3	5.74	5.21	6.12	5.3	6.11	2.8	5.32	2.13	8.56	7.55	3.89	8.85	5.85	2.64	5.32	5.67	1.21	3.58	0.03	0	0	0	0	0	0	0	0	0.3	0	0	0	0	0	0	0	0
DNAJC6	1p31.3	10.3	7.69	11.56	11.59	10.06	8.14	5.89	6.4	15.37	9.97	7.61	17.71	11.95	4.88	12.13	9.52	2.82	7.72	0.93	0.25	1.07	1.32	1.18	1.02	0.57	1.87	0.39	0.3	0.89	1.41	0.98	0.61	1.06	0.68	1.81	0.56
LEPROT	1p31.3	10.32	7.69	11.66	11.59	10.06	8.14	5.89	6.4	15.37	10.57	7.43	17.71	11.95	4.88	12.13	9.52	2.82	7.72	0.02	0	0	0	0	0	0	0	0.19	0	0	0	0	0	0	0	0	0
LEPR	1p31.3	16.48	16.38	17.3	15.89	17.36	9.92	13.31	8.8	23.54	11.18	15.22	23.14	24.39	7.93	20	12.24	5.43	12.81	0.09	0	0.29	0	0	0	0.38	0	0	0	0	0	0	0	0	0.23	0	0
PDE4B	1p31.3	8.88	6.95	9.43	8.94	8.09	4.83	8.17	4	14.01	5.44	8.85	15.09	15.61	3.05	10	6.8	1.61	5.46	0.12	0	0.19	0	0	0.25	0	0	0.19	0	0.18	0.2	0.73	0.2	0	0	0	0
SGIP1	1p31.3	13.54	12.41	13.99	16.89	12.62	10.18	11.79	6.93	20.43	11.18	12.74	21.53	19.51	5.49	14.68	13.83	1.41	4.9	0	0	0	0	0	0	0	0	0	0	0	0	0	0	0	0	0	0
TCTEX1D1	1p31.3	9.95	13.15	9.82	10.26	8.28	7.12	8.37	5.07	16.54	9.06	8.32	13.08	13.41	3.25	11.06	9.3	0.8	5.08	0.01	0	0	0	0	0	0	0	0	0	0	0	0	0	0	0	0	0
INSL5	1p31.3	14.51	15.88	13.9	13.58	13.02	10.18	12.55	6.4	22.96	14.5	12.04	20.93	20.24	5.08	17.23	14.51	1.81	7.34	0.1	0	0.1	0	0.2	0.25	0	0.27	0	0	0.35	0	0	0	0	0.23	0	0.19
WDR78	1p31.3	12.93	12.41	13.02	10.93	12.62	8.14	11.79	6.4	20.43	12.08	11.86	21.93	21.22	4.47	15.32	13.15	1.21	6.21	0.3	0.25	0.39	0	0.39	0.25	0	0.27	0.19	0	0.53	0.4	0.49	0.61	0.21	0.23	0.2	0.56
SLC35D1	1p31.3	5.46	3.47	6.12	4.97	6.31	3.05	4.37	3.2	6.61	6.34	3.72	8.05	7.07	1.83	6.17	3.85	0.8	4.52	0.06	0	0	0	0	0.25	0.19	0	0	0	0	0	0	0	0	0	0.4	0.19
C1orf141	1p31.3	5.88	3.97	7.39	4.97	6.51	2.04	5.89	3.2	8.75	5.44	4.07	9.05	10	3.25	4.89	4.08	1.01	3.95	0.01	0	0	0	0	0	0.19	0	0	0	0	0	0	0	0	0	0	0
IL23R	1p31.3	12.87	9.93	13.8	11.92	11.83	7.63	12.17	8	18.87	10.57	12.04	17.3	18.29	4.88	14.04	10.66	2.21	7.34	0.03	0	0	0	0	0	0.19	0	0	0.3	0	0	0	0	0	0	0	0
IL12RB2	1p31.3	9.3	7.69	10.2	7.28	11.24	5.85	7.6	4	15.76	11.48	7.08	11.67	13.41	2.64	9.36	6.58	0.4	6.78	0.11	0	0	0.33	0	0	0	0.27	0.39	0.3	0	0	0.24	0	0.43	0	0.2	0
SERBP1	1p31.3	8.5	8.93	9.23	7.62	9.27	4.33	6.84	2.93	12.84	7.85	6.55	12.88	13.41	2.44	9.15	6.35	0.4	6.03	0.01	0	0	0	0	0	0.19	0	0	0	0	0	0	0	0	0	0	0
GADD45A	1p31.3	0.39	0	0.68	0	0.39	0	0.19	0.53	0.58	0	0.53	1.01	0.49	0	0	0.45	0.2	0.19	0.01	0	0	0	0	0	0	0	0	0	0.18	0	0	0	0	0	0	0
GNG12	1p31.3	0.29	0	0.29	0	0.39	0	0	0.53	0.58	0	0.35	0.8	0.49	0	0	0.45	0.2	0.19	0	0	0	0	0	0	0	0	0	0	0	0	0	0	0	0	0	0
DIRAS3	1p31.3	0.87	0.5	0.97	1.32	1.58	0.25	0.57	0	0.97	1.21	0.35	0.6	1.95	0	1.28	0.23	0.2	0.94	0.01	0	0	0	0	0	0	0	0	0	0	0.2	0	0	0	0	0	0
WLS	1p31.3	8.33	7.44	8.94	6.95	8.88	4.58	5.7	4.53	15.95	8.76	6.55	12.07	11.46	2.64	9.36	5.67	0.8	2.82	0	0	0	0	0	0	0	0	0	0	0	0	0	0	0	0	0	0
RPE65	1p31.3	12.09	10.67	13.12	12.25	10.65	5.6	12.17	6.13	20.23	11.18	9.91	19.72	15.12	3.86	11.06	9.52	2.41	6.03	0.6	0.74	0.49	0.99	0.2	0.25	1.52	0.53	0.39	0.6	0.89	0.8	0.24	0.61	0.64	0.23	0.2	1.32
DEPDC1	1p31.2	12	10.92	13.02	12.58	10.06	5.34	12.17	5.87	20.23	10.88	10.27	19.72	15.61	4.06	10.85	9.52	2.41	6.03	0.09	0	0.19	0	0.2	0	0	0	0	0	0.18	0	0.24	0.2	0	0	0	0
LRRC7	1p31.1	6.51	5.21	6.71	7.62	5.72	3.05	6.65	3.47	9.34	9.06	6.73	8.25	9.27	2.24	4.26	5.67	0.8	5.46	0.05	0.25	0	0	0	0	0.19	0	0	0	0.18	0	0	0	0.21	0	0	0
LRRC40	1p31.1	2.26	3.23	2.14	2.32	1.18	0.76	2.09	1.33	5.06	1.51	2.3	3.02	2.93	0.61	2.77	1.36	0	1.32	0.12	0	0.1	0.33	0.39	0	0.19	0	0.39	0	0	0.2	0.24	0.2	0	0.45	0	0
SRSF11	1p31.1	1.84	1.49	1.75	1.99	1.78	0.51	0.76	1.33	4.28	0.91	1.59	2.82	2.2	0.81	1.91	0.45	0.2	1.69	0.03	0	0	0.33	0.2	0	0	0	0	0	0	0	0	0	0	0	0	0
ANKRD13C	1p31.1	2.72	2.23	2.82	4.3	2.76	1.78	1.33	1.6	5.06	2.11	2.48	4.83	3.41	1.63	2.13	1.81	0.4	1.69	0.02	0	0	0	0	0	0	0	0	0	0	0.2	0	0	0	0	0.2	0
HHLA3	1p31.1	2.49	1.99	2.53	4.3	2.37	1.78	1.33	1.33	4.86	2.11	2.12	4.63	3.17	1.63	2.13	1.36	0.4	1.32	0.01	0	0	0.33	0	0	0	0	0	0	0	0	0	0	0	0	0	0
CTH	1p31.1	3.94	2.98	4.28	3.31	3.94	2.54	3.23	1.87	7.98	4.53	4.42	5.63	3.9	0.61	4.47	4.08	0.8	1.88	0.22	0.25	0.39	0	0.2	0	0.38	0.27	0.39	0	0.18	0	0.73	0	0	0.45	0.2	0.19
PTGER3	1p31.1	4.32	3.23	3.3	2.98	4.34	2.29	3.23	1.07	8.17	6.04	3.89	6.84	5.37	2.03	5.74	4.76	0.2	1.69	0.01	0	0	0	0	0	0	0	0	0.3	0	0	0	0	0	0	0	0
ZRANB2	1p31.1	7.02	5.96	7.39	5.63	8.48	4.58	6.84	3.47	11.87	6.04	6.02	8.45	9.02	2.64	7.23	6.8	1.41	2.82	0.01	0	0	0	0	0	0.19	0	0	0	0	0	0	0	0	0	0	0
NEGR1	1p31.1	1.57	0.99	2.14	1.99	1.97	1.02	1.14	0.8	1.56	2.42	0.89	3.22	1.95	0	1.28	1.13	0	1.51	0.02	0	0.1	0.33	0	0	0	0	0	0	0	0	0	0	0	0	0	0
LRRIQ3	1p31.1	3.93	3.23	5.54	3.97	3.94	2.54	2.47	1.6	6.42	3.93	2.3	5.03	4.39	1.22	4.47	4.54	0.2	2.64	0.13	0	0.29	0	0.2	0.25	0	0	0	0.3	0	0	0	0	0	0	0.4	0.38
FPGT	1p31.1	9.06	7.94	9.52	8.28	7.5	3.56	8.75	4	15.56	8.16	4.6	15.9	11.46	4.06	11.7	7.94	1.21	3.01	0.07	0	0.1	0	0	0	0.19	0	0	0	0	0	0	0	0.21	0.23	0.2	0.19
TNNI3K	1p31.1	0.18	0	0.39	0	0.2	0	0.38	0	0.78	0	0	0.2	0.24	0.2	0.21	0	0	0.19	0.03	0	0	0	0	0.25	0	0.27	0	0	0	0	0	0	0	0.23	0	0
CRYZ	1p31.1	11.2	10.42	11.95	11.59	9.07	5.09	9.89	4	14.98	7.25	11.68	20.12	16.83	4.47	12.13	10.66	2.01	7.53	0.06	0	0	0	0.2	0	0	0	0	0	0	0.2	0	0.2	0.21	0	0.2	0
TYW3	1p31.1	11.2	10.42	11.95	11.59	9.07	5.09	9.89	4	14.98	7.25	11.68	20.12	16.83	4.47	12.13	10.66	2.01	7.53	0.01	0	0	0	0	0	0	0	0	0	0	0	0	0	0.21	0	0	0
LHX8	1p31.1	6.31	4.96	6.8	6.29	5.72	4.33	4.56	3.47	10.12	6.04	4.42	9.66	8.29	1.83	7.87	5.9	0.4	2.45	0.05	0	0.1	0	0	0	0.19	0	0.19	0	0	0	0	0	0	0	0	0
SLC44A5	1p31.1	14.27	16.13	14.58	13.25	13.21	9.67	11.79	6.13	23.54	9.67	12.92	26.16	18.78	5.49	17.02	11.56	2.62	7.91	0.02	0	0.1	0	0	0	0	0	0	0	0	0	0	0	0.21	0	0	0
ACADM	1p31.1	14.12	14.14	16.62	13.25	12.23	10.69	12.17	7.47	20.04	7.55	14.16	24.14	21.71	5.08	18.94	10.88	1.81	7.53	0.55	0.99	0.97	0.99	0	0.25	0.57	0.8	0.78	0	0.35	0.4	0.73	0.41	0.21	0.68	0.8	0.56
RABGGTB	1p31.1	15.46	15.88	17.4	14.9	14	9.92	13.5	9.07	24.32	9.67	14.51	24.75	26.83	7.32	18.3	11.79	2.82	6.59	0.02	0	0	0	0	0	0	0	0	0	0	0	0	0.2	0	0	0	0.19
MSH4	1p31.1	18.46	17.87	21.28	16.56	15.58	11.7	17.11	11.73	29.57	12.69	17.88	25.35	30	9.55	21.7	15.87	4.63	10.36	0.43	0.5	0.39	0.33	1.18	0.51	0.38	0.53	0.58	0.6	0.18	0.2	0.49	0.41	0.21	0.68	0.4	0.94
ASB17	1p31.1	14.79	15.63	15.26	12.91	12.82	9.41	13.31	8.53	24.12	9.06	14.69	21.33	23.66	8.54	16.81	12.47	3.02	7.91	0.03	0	0	0	0.2	0	0	0	0	0	0	0	0	0.2	0	0.23	0	0
ST6GALNAC3	1p31.1	6.2	2.73	5.73	6.62	6.9	2.04	4.94	3.47	10.51	5.74	4.78	8.65	9.27	2.85	6.6	5.9	0.4	3.58	0.03	0	0	0	0	0	0	0	0	0	0	0	0	0	0	0	0	0.19
ST6GALNAC5	1p31.1	1.25	1.74	0.97	1.32	0.59	1.27	0.38	0.8	1.95	0.6	1.77	2.41	3.41	0.41	0.85	1.13	0	0.75	0	0	0	0	0	0	0	0	0	0	0	0	0	0	0	0	0	0
PIGK	1p31.1	5.01	3.72	5.44	4.64	4.14	3.82	3.99	2.4	6.42	6.04	5.13	8.45	7.56	2.64	7.45	3.85	0.4	1.88	0.01	0	0	0	0	0	0.19	0	0	0	0	0	0	0	0	0	0	0
AK5	1p31.1	9.67	6.95	9.62	7.62	9.07	6.62	9.7	5.07	12.06	9.37	10.44	13.28	15.12	4.06	9.79	9.07	1.01	5.08	0.1	0.25	0.1	0	0.39	0	0	0.27	0.19	0	0	0	0	0.2	0.21	0	0	0.19
ZZZ3	1p31.1	2.41	1.49	2.43	1.66	2.17	0.25	1.71	1.33	3.11	3.63	2.65	4.23	3.17	0.41	3.62	1.81	0	0.94	0.27	0.25	0.49	0	0.39	0.51	0	0.53	0	0	0.18	0.2	0	0.41	0.85	0.91	0.4	0
USP33	1p31.1	8.14	8.44	7.58	8.28	7.3	5.34	8.75	3.2	10.7	7.55	8.32	12.27	12.93	3.86	7.23	7.26	1.41	5.46	0.02	0	0	0	0	0	0.19	0	0	0.3	0	0	0	0	0	0	0	0
FAM73A	1p31.1	1.1	0.99	1.94	0.33	1.18	1.02	0.38	0.53	1.75	0.3	0.89	1.21	0.98	0.61	0.21	1.81	0	0.38	0.02	0	0.1	0	0	0	0	0.27	0	0	0	0	0	0	0	0	0	0
FUBP1	1p31.1	3.32	1.74	3.3	2.98	4.54	1.27	3.61	2.13	4.86	3.02	3.19	5.23	5.12	0.41	4.26	2.72	0.4	1.69	0	0	0	0	0	0	0	0	0	0	0	0	0	0	0	0	0	0
DNAJB4	1p31.1	3.22	1.99	3.21	2.98	4.54	1.27	3.23	1.87	4.86	3.02	3.19	5.23	4.39	0.41	4.26	2.72	0.4	1.69	0.04	0.25	0	0	0	0	0.19	0	0	0.3	0	0	0	0	0.21	0	0	0
GIPC2	1p31.1	5.27	5.21	6.12	3.64	3.94	3.05	3.99	2.4	8.56	6.65	5.49	7.85	6.59	2.85	5.32	6.8	2.01	2.64	0.16	0.25	0.19	0	0	0	0.38	0	0	0	0	0	0.24	0	0.43	0	0.2	1.13
PTGFR	1p31.1	2.17	1.49	2.24	1.66	0.99	1.27	1.71	1.6	5.45	0.91	2.12	4.63	4.88	0.61	1.91	1.13	0.4	1.32	0.01	0	0	0	0	0	0	0	0.19	0	0	0	0	0	0	0	0	0
IFI44L	1p31.1	14.34	15.14	14.48	12.25	12.23	7.12	13.12	6.13	20.23	16.01	15.4	25.15	19.02	7.11	17.45	12.93	1.61	7.34	0.06	0	0.1	0	0	0	0	0	0	0.3	0	0.2	0	0.41	0	0	0	0
IFI44	1p31.1	14.34	15.14	14.48	12.25	12.23	7.12	13.12	6.13	20.23	16.01	15.4	25.15	19.02	7.11	17.45	12.93	1.61	7.34	0.08	0	0.19	0	0	0	0	0	0.39	0	0	0	0.24	0.2	0	0	0	0
LPHN2	1p31.1	6.95	6.95	8.65	5.96	6.11	3.56	6.08	4.27	10.89	5.44	6.19	10.46	9.27	2.03	6.6	6.35	1.01	3.58	0.09	0	0	0	0	0	0.19	0.53	0.19	0.3	0.18	0.2	0	0	0	0	0	0.38
TTLL7	1p31.1	3.55	2.48	4.08	2.32	3.35	1.27	2.85	1.33	4.47	3.02	3.19	4.63	5.12	1.02	4.68	3.85	0.2	2.26	0	0	0	0	0	0	0	0	0	0	0	0	0	0	0	0	0	0
PRKACB	1p31.1	0.49	0.25	0.58	0.99	0.59	0.25	0.57	0.53	0.39	0.3	0.35	0.4	0.98	0	0.21	0.45	0	1.32	0.03	0	0	0	0	0	0	0	0.19	0	0	0	0	0	0	0.23	0.2	0
SAMD13	1p31.1	1.84	1.99	3.3	0.66	2.17	1.02	0.76	0.53	2.92	0.91	1.59	3.02	2.44	1.22	1.7	1.13	0.4	1.69	0.03	0	0	0	0	0	0	0.27	0	0.3	0	0	0	0	0	0.23	0	0
DNASE2B	1p31.1	9.74	9.68	13.12	8.61	10.06	4.58	9.51	4.27	14.79	8.16	7.43	16.5	11.71	2.24	12.34	8.84	1.01	6.21	0.08	0	0.1	0	0	0	0.19	0	0	0	0	0	0.24	0.2	0	0.23	0	0
RPF1	1p22.3	5.49	3.97	6.71	5.96	6.11	2.04	4.37	2.93	8.17	5.44	5.31	6.44	6.59	3.05	5.96	3.17	0.8	3.77	0.12	0.25	0	0.33	0	0	0	0	0	0	0.35	0	0.24	0	0.21	0	0.2	0.38
GNG5	1p22.3	5.49	3.97	6.71	5.96	6.11	2.04	4.37	2.93	8.17	5.44	5.31	6.44	6.59	3.05	5.96	3.17	0.8	3.77	0	0	0	0	0	0	0	0	0	0	0	0	0	0	0	0	0	0
CTBS	1p22.3	9.33	9.93	11.27	5.96	6.71	6.36	8.94	5.87	12.26	8.46	11.33	14.49	13.66	3.46	10.85	10.2	2.01	3.58	0.01	0	0	0	0	0	0	0.27	0	0	0	0	0	0	0	0	0	0
SSX2IP	1p22.3	7.11	8.19	6.41	5.3	5.33	4.07	6.84	2.67	12.84	7.55	6.37	11.87	8.29	2.64	7.66	5.44	0.6	3.2	0.07	0.25	0	0.33	0.2	0	0	0	0.19	0	0	0	0	0	0.21	0	0	0
LPAR3	1p22.3	5.32	5.71	3.69	0.99	5.52	4.07	4.18	3.2	10.7	6.04	4.78	8.85	7.56	2.24	7.87	7.03	0.6	1.69	0.02	0.25	0	0	0	0	0	0	0	0	0	0	0	0	0	0.23	0	0
MCOLN2	1p22.3	12.37	12.9	14.38	8.94	12.23	8.4	10.84	7.2	16.34	12.39	10.27	17.51	17.32	4.06	15.53	10.2	2.21	7.16	0.16	0	0.39	0.33	0	1.02	0	0.27	0	0	0	0.2	0	0	0	0.23	0	0.38
WDR63	1p22.3	15.69	14.39	16.23	15.23	16.17	8.91	15.21	6.93	21.98	18.43	12.04	22.94	23.9	6.91	17.87	12.47	2.21	9.6	0.11	0	0.1	0	0.2	0	0	0.27	0.19	0	0	0.2	0.24	0.2	0.21	0.23	0	0
MCOLN3	1p22.3	6.71	4.47	8.07	7.62	5.52	3.05	7.22	3.73	10.12	9.97	3.72	9.86	12.2	2.24	5.96	6.35	1.21	3.01	0.2	0.5	0.1	0.66	0	0.25	0.19	0	0.19	0	0.53	0	0.24	0.2	0.43	0.23	0.2	0
C1orf52	1p22.3	9.49	8.44	7.97	3.97	7.69	5.34	8.37	5.6	15.56	11.78	8.14	16.3	12.44	4.06	13.4	6.35	0.4	3.58	0	0	0	0	0	0	0	0	0	0	0	0	0	0	0	0	0	0
BCL10	1p22.3	9.49	8.44	7.97	3.97	7.69	5.34	8.37	5.6	15.56	11.78	8.14	16.3	12.44	4.06	13.4	6.35	0.4	3.58	0	0	0	0	0	0	0	0	0	0	0	0	0	0	0	0	0	0
DDAH1	1p22.3	6.51	8.68	6.41	4.97	4.93	5.34	4.94	2.93	11.09	4.83	6.9	9.26	10	2.85	8.94	6.12	0.2	3.39	0.02	0	0	0	0	0	0	0	0	0	0	0.2	0	0	0	0	0.2	0
CYR61	1p22.3	0.93	0.74	1.17	1.32	0.2	0	0.95	0	1.36	1.51	0.89	0.6	1.46	0.41	0.43	2.49	0.2	0.56	0.01	0	0	0	0	0	0.19	0	0	0	0	0	0	0	0	0	0	0
ZNHIT6	1p22.3	8.27	5.96	8.26	6.62	8.48	3.82	4.94	4.27	11.67	9.06	7.79	13.48	10.98	2.44	10.85	5.67	0	3.95	0.03	0	0.1	0	0	0	0	0	0	0	0	0	0	0.2	0	0	0	0
CLCA2	1p22.3	19.78	20.84	22.16	19.21	16.77	13.74	18.25	9.07	28.99	18.13	20.35	28.77	27.56	7.93	25.11	16.1	1.81	10.17	0.17	0	0.29	0.33	0	0.25	0	0	0.39	0.3	0	0.2	0.49	0.2	0	0	0.2	0
CLCA1	1p22.3	20.04	20.6	21.87	17.88	18.74	12.47	17.87	8.53	29.96	20.24	17.7	29.98	27.8	7.52	24.68	17.46	1.21	10.17	0.08	0	0.1	0	0	0	0	0	0	0	0	0	0	0	0	0	0.4	0
SH3GLB1	1p22.3	7.47	7.44	8.65	8.61	6.31	4.83	6.27	4	10.7	6.95	7.79	10.26	9.27	2.85	7.23	6.58	0.8	3.77	0	0	0	0	0	0	0	0	0	0	0	0	0	0	0	0	0	0
HS2ST1	1p22.3	4	3.97	5.54	3.97	3.35	2.29	3.42	1.87	5.45	1.51	5.66	6.24	4.88	1.63	3.83	4.08	1.01	1.88	0.11	0	0.1	0.33	0.2	0	0	0	0.19	0	0	0.2	0.49	0	0.21	0.23	0	0.19
LMO4	1p22.3	0.86	0.5	0.87	1.66	1.58	0	0.95	1.33	0.78	0.3	1.06	1.41	0.73	0.2	0.64	0.68	0	0.56	0	0	0	0	0	0	0	0	0	0	0	0	0	0	0	0	0	0
GTF2B	1p22.2	0.72	0.5	1.55	1.32	1.18	0.25	0.76	0	0.58	0.3	1.42	1.21	0.73	0	0.64	0	0	0.56	0.02	0	0	0	0.2	0	0	0.27	0	0	0	0	0	0	0	0	0	0
CCBL2	1p22.2	17.28	17.37	17.78	14.9	17.95	11.45	14.64	10.93	24.9	15.11	17.17	28.17	24.15	6.5	21.49	14.29	2.01	9.79	0.35	0	0.39	0.66	0.2	0.51	0.38	0	0.39	0.6	0.35	0.2	0	0.2	0.64	0.45	0.4	0.38
RBMXL1	1p22.2	17.33	17.37	17.88	15.23	17.95	11.45	14.45	10.93	24.9	15.11	17.35	28.17	24.15	6.5	21.49	14.29	2.01	9.79	0	0	0	0	0	0	0	0	0	0	0	0	0	0	0	0	0	0
GBP3	1p22.2	14.64	15.38	15.55	13.25	15.19	9.67	12.17	9.33	20.82	13.6	14.87	23.74	19.76	5.89	16.6	11.79	1.81	7.72	0.26	0	0.39	0	0	0.25	0	0.27	0.39	0	0.35	0.4	0.24	0.2	0	0.45	0.2	0.19
GBP1	1p22.2	14.42	12.16	15.55	12.91	14.2	11.7	14.45	8	21.01	11.48	12.39	22.94	21.71	6.1	17.66	11.79	1.81	8.66	0.38	0.5	0.39	0	0	0.25	0.38	1.33	0.39	0.6	0.18	0.2	0	0	0.64	0	1.01	0.38
GBP2	1p22.2	8.2	7.44	8.07	6.29	4.14	6.62	8.17	4.27	11.87	6.95	8.67	12.27	10.73	3.25	10	7.26	2.01	3.58	0.15	0.25	0.1	0	0	0	0.19	0.53	0.19	0.3	0.18	0	0	0.2	0.43	0	0	0.19
GBP7	1p22.2	6.73	8.19	7.09	3.64	4.54	4.07	5.51	3.47	11.09	5.14	6.73	10.26	10.24	2.64	7.23	6.35	0.6	3.39	0.45	0.5	0.19	0.66	0.39	0.51	0.76	0.53	0.39	0.91	0.35	0.4	0.73	0.81	0.43	0.23	0	1.13
GBP4	1p22.2	2.96	2.98	4.96	2.98	3.16	2.04	1.9	1.6	4.09	1.81	2.48	4.02	3.9	1.02	4.04	1.59	0.2	1.88	0.17	0.25	0.29	0	0.2	0	0.76	0.27	0.19	0	0.18	0.2	0	0	0.21	0.23	0.4	0
GBP5	1p22.2	4.94	5.71	6.41	4.64	4.14	2.04	3.99	2.93	7.78	4.83	6.02	7.44	6.34	0.81	6.81	2.49	0.2	2.45	0.13	0	0.19	0.33	0.2	0	0.19	0	0.58	0	0.18	0	0.24	0.2	0	0.23	0	0.19
GBP6	1p22.2	9.95	13.65	10.5	8.94	8.09	4.07	10.65	5.33	12.65	7.85	9.73	15.69	10.73	4.27	13.62	8.84	1.61	4.14	0.31	0	0.19	0	0	0.51	0.38	0.27	0.97	0	0.18	0.8	0.24	0.2	0.43	0.23	0.2	0.38
LRRC8B	1p22.2	6.89	5.71	7.48	4.3	7.3	4.58	5.13	4	10.31	5.74	6.9	9.05	9.76	2.24	9.15	6.8	0.2	2.26	0.01	0	0	0	0	0	0	0	0	0	0	0	0.24	0	0	0	0	0
LRRC8C	1p22.2	3.72	1.74	5.15	1.99	2.37	2.04	4.75	1.6	7.39	3.32	3.19	6.24	5.12	1.22	4.26	2.72	0	2.45	0.04	0	0	0.33	0.2	0	0	0	0.19	0	0	0	0.24	0	0	0	0	0
LRRC8D	1p22.2	0.26	0	0.78	0.99	0.2	0.25	0.19	0	0.39	0	0	0.6	0.24	0.2	0.21	0.23	0	0	0	0	0	0	0	0	0	0	0	0	0	0	0	0	0	0	0	0
ZNF326	1p22.2	6.05	4.22	7.48	3.31	5.72	3.31	5.13	2.93	10.51	4.23	4.96	11.47	10	2.24	8.94	5.22	0.2	1.32	0	0	0	0	0	0	0	0	0	0	0	0	0	0	0	0	0	0
BARHL2	1p22.2	0.38	0	0.58	0.66	0.2	0	0.57	0	0	0	0.35	0.2	0.49	0	0.21	0.23	0	0.19	0.14	0.25	0.19	0	0	0.51	0	0	0.19	0.3	0	0	0.49	0	0	0.45	0	0.19
ZNF644	1p22.2	4.04	5.21	4.86	2.98	2.76	3.05	2.09	2.93	5.25	3.63	3.36	4.83	6.1	1.02	4.68	4.31	0.4	2.07	0	0	0	0	0	0	0	0	0	0	0	0	0	0	0	0	0	0
HFM1	1p22.2	13.96	13.65	15.74	11.26	12.82	7.38	13.12	5.07	22.57	11.48	11.86	22.33	18.29	5.49	20.64	13.15	2.41	7.34	0.21	0	0.19	0.99	0.39	0.25	0.19	0	0.39	0	0.18	0	0	0.2	0.21	0.45	0.2	0.19
CDC7	1p22.2	4.84	4.71	5.15	4.64	4.14	3.31	5.7	1.6	6.81	6.34	4.6	6.44	5.61	1.02	7.66	4.99	0.2	2.64	0.02	0	0	0	0	0.25	0	0	0	0	0	0	0	0	0	0	0.2	0
TGFBR3	1p22.1	14.66	13.4	16.23	10.6	11.44	8.65	13.12	5.6	22.57	17.22	12.04	23.94	17.07	5.08	18.51	14.29	1.81	6.97	0.08	0	0.19	0	0.2	0	0.19	0	0.19	0	0	0	0	0.2	0.21	0	0	0
BRDT	1p22.1	10.39	9.93	11.95	8.28	9.27	5.85	9.13	4.53	12.45	9.67	8.32	13.88	12.68	4.06	14.47	10.88	1.41	5.84	0.04	0	0	0.33	0	0	0	0.27	0	0	0	0.2	0	0	0	0.23	0	0
EPHX4	1p22.1	2.39	1.24	3.69	2.98	3.35	1.53	0.95	2.93	1.95	1.21	2.12	2.21	3.41	0.2	0.85	0.91	0.2	1.69	0.02	0	0	0.33	0	0	0	0	0	0	0	0	0.24	0	0	0	0	0
BTBD8	1p22.1	4.3	3.47	4.28	3.31	5.72	2.8	3.61	2.93	7.39	3.93	3.01	7.85	7.32	1.42	2.98	2.49	0.8	1.51	0.03	0	0.19	0	0	0	0	0	0	0	0	0	0	0	0	0	0.2	0
C1orf146	1p22.1	7.91	7.69	8.75	5.3	4.73	4.83	7.03	4	14.4	5.14	7.96	13.68	12.2	3.25	10.21	7.26	1.21	3.58	0	0	0	0	0	0	0	0	0	0	0	0	0	0	0	0	0	0
GLMN	1p22.1	9.8	9.93	11.76	6.62	7.3	7.63	8.37	4.8	15.56	6.04	9.91	15.29	15.85	4.47	12.77	8.39	1.61	4.9	0.11	0	0.1	0.33	0.59	0	0.19	0	0	0	0.18	0	0	0.2	0.21	0.23	0	0
RPAP2	1p22.1	5.89	5.46	6.8	4.64	4.54	5.85	4.75	3.2	10.7	3.63	5.13	7.04	10.49	2.24	7.02	4.76	0.8	2.64	0.11	0.25	0	0.33	0	0	0	0	0	0.3	0	0.2	0	0.2	0.21	0	0.4	0.19
GFI1	1p22.1	4.55	4.22	3.79	3.97	2.56	1.78	3.99	2.4	8.56	3.93	3.89	10.66	4.63	1.42	7.23	2.49	0.2	1.51	0	0	0	0	0	0	0	0	0	0	0	0	0	0	0	0	0	0
EVI5	1p22.1	9.69	9.93	11.47	9.6	6.9	4.33	8.94	5.87	15.56	7.85	8.5	16.1	11.22	3.46	12.13	6.12	1.81	5.27	0.15	0	0.19	0.33	0	0.25	0	0.27	0	0	0	0	0.49	0.41	0	0.23	0	0.38
RPL5	1p22.1	0.47	0.5	0.97	0.66	0.39	0	0	0.53	0.58	0	1.06	0.2	0.49	0.61	0.21	0.23	0.2	0.38	0.03	0	0.1	0.33	0	0.25	0	0	0	0	0	0	0	0	0	0	0	0
MTF2	1p22.1	8.34	8.68	10.59	7.28	5.72	4.83	7.98	3.47	11.87	8.46	7.08	13.48	10	3.05	10.64	9.07	1.21	3.95	0.01	0	0.1	0	0	0	0	0	0	0	0	0	0	0	0	0	0	0
TMED5	1p22.1	8.27	8.68	10.5	6.95	5.72	4.83	7.98	3.47	11.87	8.46	6.9	13.28	10	3.05	10.64	9.07	1.21	3.95	0	0	0	0	0	0	0	0	0	0	0	0	0	0	0	0	0	0
DR1	1p22.1	1.77	2.73	1.65	1.99	1.38	0.76	1.52	1.07	2.53	1.21	1.59	2.62	2.68	0.61	2.77	1.59	0	1.32	0	0	0	0	0	0	0	0	0	0	0	0	0	0	0	0	0	0
BCAR3	1p22.1	2.42	1.49	3.01	1.99	1.97	1.78	2.09	2.4	3.5	2.11	2.3	4.83	3.41	0.61	1.91	2.27	0.2	1.88	0.13	0	0.1	0	0.59	0	0	0	0.19	0.3	0	0	0	0.41	0.21	0	0.4	0.38
GCLM	1p22.1	4.12	3.47	5.05	3.97	3.55	5.09	3.23	1.6	6.03	3.63	2.12	4.83	4.63	1.83	4.47	4.31	0.4	1.69	0	0	0	0	0	0	0	0	0	0	0	0	0	0	0	0	0	0
ABCA4	1p22.1	25.07	22.83	29.45	23.51	23.47	19.08	21.48	14.4	35.41	22.66	23.54	37.22	32.2	11.18	30.85	23.81	4.02	14.12	2.55	2.23	2.33	2.32	1.97	3.82	0.95	2.67	2.72	2.42	3.54	1.81	2.2	2.44	2.98	3.63	3.02	2.45
ARHGAP29	1p22.1	8.17	7.2	9.82	3.31	8.48	2.54	8.94	7.73	11.09	7.55	6.02	11.87	10.73	3.05	9.79	7.71	0.8	3.77	0.05	0	0.1	0	0.2	0	0	0	0.19	0	0	0.2	0	0.2	0	0	0	0
ABCD3	1p21.3	5.32	3.72	6.71	4.97	5.13	2.29	5.51	3.47	7	3.32	4.42	8.45	6.59	1.22	7.45	5.9	0.2	1.51	0.44	0.5	0.78	0.33	0	1.02	0.76	0.53	0.58	0	0.18	0.6	0	0.2	0.43	0.45	0.6	0.56
F3	1p21.3	0.96	0.25	1.26	0.33	1.38	0.76	0.57	1.6	0.19	0.91	1.42	1.61	0.73	0	0.85	0.91	0	1.69	0.03	0	0.1	0	0.2	0	0	0	0	0	0.18	0	0	0	0	0	0	0
SLC44A3	1p21.3	16.83	17.37	19.24	11.59	14	12.21	14.64	8.27	25.29	20.85	14.34	26.36	19.76	7.32	21.91	14.74	1.21	7.34	0.3	0	0.49	0.33	0.39	0.25	0	0.53	0	0.3	0.18	0	0.49	0.41	0.43	0.45	0.2	0.56
CNN3	1p21.3	13.55	13.65	15.45	8.61	12.82	7.63	12.36	5.33	21.01	18.13	11.33	21.33	15.85	5.69	17.02	12.7	0.2	6.03	0	0	0	0	0	0	0	0	0	0	0	0	0	0	0	0	0	0
ALG14	1p21.3	1.45	0.74	1.65	1.32	2.17	0.25	2.28	0.27	1.95	1.21	0.89	1.21	2.44	0.61	0.64	1.13	0.2	1.69	0.14	0.5	0	0	0	0.25	0.38	0	0.19	0.3	0	0	0.24	0	0	0	0	0.38
TMEM56	1p21.3	0	0	0	0	0	0	0	0	0	0	0	0	0	0	0	0	0	0	0.01	0	0.1	0	0	0	0	0	0	0	0	0	0	0	0	0	0	0
PTBP2	1p21.3	9.43	9.93	10.98	6.29	8.28	3.82	9.51	5.6	14.79	8.16	7.43	16.3	12.44	2.44	10	9.75	1.41	3.58	0.02	0.25	0	0	0	0	0	0	0	0	0	0.2	0	0	0	0	0	0
DPYD	1p21.3	11.44	11.17	13.9	7.62	8.68	7.63	10.46	6.4	16.73	11.18	10.8	20.72	12.68	4.67	15.32	12.47	1.41	4.71	1.06	0.99	0.68	1.32	0.79	1.27	0.57	1.6	2.33	0.91	1.42	0.8	0.49	1.63	0.64	0.68	0.8	1.32
SNX7	1p21.3	5.45	4.71	7.09	5.96	5.33	2.29	5.32	1.87	8.37	6.34	3.36	8.85	5.85	1.63	4.89	6.35	1.41	3.2	0.02	0	0	0.33	0	0	0	0	0.19	0	0	0	0	0	0	0	0	0
LPPR5	1p21.3	6.63	3.23	7.58	3.97	7.5	2.8	6.46	3.47	8.95	7.85	7.08	8.85	7.56	2.44	8.09	8.16	1.01	3.2	0.02	0	0	0.33	0	0	0.19	0	0	0	0	0	0	0	0	0	0	0
LPPR4	1p21.2	1.09	0.74	1.75	0.99	1.38	0	0.76	0.27	1.75	0.6	0.53	1.01	2.44	0.2	0.43	1.36	0	0.56	0.02	0	0	0.33	0	0	0	0	0.19	0	0	0	0	0	0	0	0	0
PALMD	1p21.2	10.93	8.68	12.44	8.94	10.06	9.16	11.03	5.33	14.79	9.06	10.27	18.11	12.68	2.64	12.13	9.3	2.01	3.77	0.02	0.25	0	0	0	0	0	0	0	0	0	0	0	0	0	0	0	0
FRRS1	1p21.2	8.76	8.93	9.91	7.95	8.09	6.36	7.41	5.87	14.4	6.34	9.2	13.68	11.22	2.44	6.17	7.03	1.21	3.95	0.1	0	0	0	0	0.25	0	0	0.19	0	0.35	0.2	0	0.41	0	0	0	0.19
AGL	1p21.2	18.07	22.08	19.34	19.54	15.58	12.21	14.64	8.8	25.1	16.31	19.47	28.77	25.61	8.94	17.23	17.69	4.43	9.04	1.18	0.25	1.07	2.98	1.18	0.51	0.95	1.33	0.78	1.21	0.89	1.41	2.2	1.02	1.49	1.36	1.61	0.56
SLC35A3	1p21.2	2.73	3.23	3.79	4.3	2.96	1.02	3.04	2.13	2.53	1.51	2.48	3.82	3.17	0.41	2.98	1.59	0.4	0.94	0.01	0	0	0	0	0.25	0	0	0	0	0	0	0	0	0	0	0	0
HIAT1	1p21.2	8.02	5.46	9.14	6.62	5.72	4.58	6.84	3.73	13.81	4.83	7.43	13.28	12.2	2.64	8.09	7.94	0.4	3.39	0.01	0	0	0	0	0	0	0	0.19	0	0	0	0	0	0	0	0	0
SASS6	1p21.2	8.45	5.46	9.91	7.95	6.71	5.85	7.22	4.27	13.81	6.04	7.79	13.28	12.68	2.85	8.09	8.39	0.6	4.33	0.02	0	0	0.33	0	0	0	0	0	0	0	0	0	0	0	0	0.2	0
LRRC39	1p21.2	5.17	5.46	6.32	3.64	4.54	4.33	4.94	3.47	7.78	4.23	5.13	7.04	6.59	2.24	5.11	4.08	0.6	3.01	0.08	0	0.1	0	0.2	0.25	0	0.27	0	0	0	0.2	0	0	0.43	0.23	0	0
DBT	1p21.2	3.59	3.72	4.96	2.65	2.56	2.54	3.42	2.4	5.45	2.72	3.19	6.04	4.63	1.63	2.77	2.95	0.4	1.69	0.1	0.25	0.1	0	0	0	0.19	0	0	0.6	0.18	0.4	0.24	0	0	0	0	0
CDC14A	1p21.2	4.06	2.23	6.03	5.96	5.52	2.8	3.42	2.93	4.09	2.72	4.6	5.83	4.15	0.81	3.19	2.95	0.4	2.45	0.07	0	0.19	0	0	0	0	0	0	0	0.18	0	0	0	0.21	0	0	0
VCAM1	1p21.2	6.18	4.96	6.71	5.63	5.33	3.05	4.94	3.2	9.92	6.04	5.31	10.87	8.05	1.42	8.3	3.17	0.4	4.52	0.06	0	0.1	0	0	0.25	0	0	0	0	0	0.2	0	0.2	0.21	0	0.2	0
EXTL2	1p21.2	3.11	1.99	3.6	3.64	2.76	1.78	1.71	2.67	5.06	6.34	3.01	4.63	1.71	1.22	3.19	2.04	0	1.69	0.17	0.25	0.29	0	0.39	0	0.19	0.27	0	0.3	0	0.2	0.24	0.2	0.21	0	0.4	0
SLC30A7	1p21.2	2.6	1.74	2.43	2.32	2.37	1.53	1.52	3.2	5.06	4.83	2.48	4.23	1.22	0.81	3.19	2.27	0	0.94	0.1	0.25	0	0	0	0	0.19	0	0.19	0	0	0	0.24	0.41	0.21	0	0.6	0
S1PR1	1p21.2	0.31	0.25	0.39	0.66	0.39	0	0	0.27	0.19	0	0.71	1.21	0.49	0	0.21	0.45	0	0.38	0	0	0	0	0	0	0	0	0	0	0	0	0	0	0	0	0	0
OLFM3	1p21.1	6.72	6.45	8.07	9.27	4.93	3.31	5.32	3.73	10.7	6.04	4.78	9.46	10.73	2.85	9.15	3.85	0.6	1.88	0.32	0.25	0.19	0	0.39	0.25	0.95	0.53	0	0.3	0.53	0	0.24	0	0.43	0	0.2	0.56
COL11A1	1p21.1	19.8	20.84	22.16	16.23	16.57	12.47	17.49	11.47	27.82	14.2	20.53	30.18	26.1	10.98	25.96	16.78	5.83	12.24	1.28	1.99	1.46	0.99	0.99	2.29	1.33	1.6	1.17	1.21	1.42	1.41	1.46	1.63	1.06	1.59	0.6	1.32
AMY2A	1p21.1	7.04	4.71	7.29	5.63	5.72	3.31	6.65	3.47	13.81	5.44	6.19	11.67	8.78	2.03	8.09	6.35	0.4	2.26	0.15	0	0	0	0	0.25	0.38	0.8	0.19	0	0.18	0.2	0	0.2	0.21	0	0	0.19
AMY2B	1p21.1	6.95	4.71	7.29	5.63	5.52	3.31	6.65	3.47	13.62	4.83	6.02	11.47	8.78	2.03	8.09	6.35	0.4	2.26	0.44	0	0.29	0.66	0	0	0.95	0.8	1.17	0.3	0.53	0.6	0	0.61	0	0.91	1.01	0.38
NTNG1	1p13.3	1.37	0.74	2.04	1.99	2.96	1.27	0.57	1.07	0.97	0.6	1.24	2.01	0.73	0.41	0.85	0.91	0.2	0.75	0.05	0	0	0	0	0.25	0.19	0	0.19	0	0.18	0	0	0	0	0	0.2	0
VAV3	1p13.3	15.53	14.64	16.42	13.25	13.81	10.18	15.21	9.07	23.74	14.8	12.74	25.35	15.85	6.1	19.36	13.83	2.41	10.17	0.2	0.25	0.49	0	0.2	0	0.38	0.27	0.39	0.3	0	0	0	0.2	0	0.23	0.4	0.19
SLC25A24	1p13.3	8.07	6.45	10.4	8.28	6.9	4.83	7.6	5.6	12.26	7.85	7.26	8.85	9.51	2.64	10.85	5.9	1.01	3.77	0.27	0	0.29	0	0	0	0.95	0	0	0	0.18	0.2	0	0.61	0.64	0.23	0.4	0.56
FAM102B	1p13.3	3.56	3.23	5.15	4.97	2.76	2.04	3.42	2.93	5.25	3.63	3.89	4.23	3.41	0.81	1.91	2.04	0.8	2.07	0.06	0	0	0	0	0	0	0	0.19	0	0	0.2	0.24	0.2	0	0	0	0.19
PRPF38B	1p13.3	14.33	14.89	14.97	12.58	12.43	7.89	14.45	6.67	22.37	8.16	15.75	24.95	16.1	5.08	20.21	13.38	0.8	6.59	0.02	0	0.1	0	0	0	0	0	0	0	0	0	0	0.2	0	0	0	0
FNDC7	1p13.3	15.09	15.88	15.94	13.91	13.41	8.65	14.64	6.93	22.57	9.97	16.81	25.96	16.83	5.28	20.85	13.83	1.01	7.34	0.41	0.74	0.19	0.66	0.2	0	0.57	0.27	0.39	0.3	0.35	0	0.73	0.2	0.85	0.23	0.4	0.75
STXBP3	1p13.3	20.29	22.08	19.34	19.87	18.93	17.05	18.63	9.33	29.38	16.92	21.24	33.2	26.59	7.11	24.47	18.14	3.22	9.23	0.07	0	0.1	0	0	0	0	0	0.19	0	0	0	0.24	0	0.21	0	0	0
AKNAD1	1p13.3	21.29	23.57	19.63	20.2	19.33	17.56	19.01	10.13	32.68	19.64	21.24	34.61	27.32	7.52	24.68	17.91	3.02	10.55	0.08	0.25	0.19	0	0	0	0.19	0	0	0.3	0	0.2	0.24	0	0	0	0.2	0
GPSM2	1p13.3	13.49	14.14	13.7	15.23	11.44	11.45	12.93	8.53	19.46	8.46	15.58	21.33	15.37	5.69	15.32	10.2	1.21	7.53	0.44	0.74	0.58	0	0.2	0.51	0.19	0.53	0.58	1.21	0.89	0.2	0.24	0.41	0.64	0.45	0.4	0.19
CLCC1	1p13.3	13.34	13.15	13.22	14.24	11.05	10.69	13.12	8.8	20.43	8.46	15.04	20.93	14.63	5.69	15.53	10.66	1.01	7.34	0.04	0	0	0	0.2	0	0.38	0	0	0	0	0	0	0	0	0	0	0
WDR47	1p13.3	1.15	0.5	1.26	0.99	1.38	1.27	0.57	0.8	2.92	1.21	1.24	1.01	0.98	0	1.7	1.81	0	0.75	0.02	0	0	0	0.2	0	0	0	0	0	0	0	0	0.2	0	0	0	0
TAF13	1p13.3	2.77	2.98	2.24	1.66	1.97	1.78	2.85	1.07	4.86	2.72	2.83	4.63	2.44	1.02	3.83	2.49	0.2	1.32	0.05	0.5	0.19	0	0	0	0	0	0	0	0	0	0	0	0	0	0	0.19
KIAA1324	1p13.3	12.27	12.41	13.41	12.25	11.83	9.41	13.5	7.2	16.73	9.97	13.27	17.91	16.59	4.67	12.13	7.94	1.21	8.1	0.14	0	0.19	0.33	0.2	0.25	0	0	0.39	0	0.18	0	0	0.2	0	0.23	0	0
TMEM167B	1p13.3	2.76	2.98	2.24	1.66	1.97	1.78	2.85	1.07	4.67	2.72	2.83	4.63	2.44	1.02	3.83	2.49	0.2	1.32	0	0	0	0	0	0	0	0	0	0	0	0	0	0	0	0	0	0
SARS	1p13.3	22.29	20.35	23.62	22.19	21.5	15.27	22.62	13.6	28.99	19.94	23.01	35.81	30.49	7.72	25.32	18.82	2.41	13.94	0.03	0	0.1	0.33	0	0	0	0.27	0	0	0	0	0	0	0	0	0	0
CELSR2	1p13.3	22.12	20.84	23.03	19.87	20.91	14.5	22.43	11.47	29.77	19.94	22.83	36.02	30.98	7.93	26.38	19.27	2.21	11.49	0.33	0	0.58	0.99	0	0.25	0.38	0.27	0.19	0.6	0.18	0.2	0.49	0.61	0.21	0	0.6	0.19
PSRC1	1p13.3	21.7	20.84	22.35	19.54	20.12	14.25	22.43	11.47	29.57	19.03	22.83	34.81	30.98	7.52	25.53	18.82	2.21	11.11	0.06	0	0	0	0.2	0	0.38	0	0.19	0	0	0	0	0	0.21	0	0	0
MYBPHL	1p13.3	21.84	21.59	21.87	19.87	20.51	14.5	21.67	11.47	29.96	19.03	23.54	35.41	29.76	7.93	26.17	17.69	2.41	11.49	0.17	0.25	0.19	0	0.2	0	0.19	0.27	0.19	0.3	0	0	0	0	0.21	0.45	0.2	0
SORT1	1p13.3	7.99	5.96	8.84	6.62	5.92	5.85	8.17	2.93	12.84	5.44	7.26	15.29	10.24	2.64	12.34	5.44	0.4	3.39	0	0	0	0	0	0	0	0	0	0	0	0	0	0	0	0	0	0
PSMA5	1p13.3	5.39	2.98	5.93	4.64	3.55	4.33	4.75	2.13	10.7	2.11	4.07	8.45	6.1	2.24	8.3	3.85	0.2	1.69	0	0	0	0	0	0	0	0	0	0	0	0	0	0	0	0	0	0
ATXN7L2	1p13.3	5.9	4.47	6.51	6.29	6.11	2.54	5.32	3.2	8.37	3.32	6.19	10.26	8.29	1.83	8.09	4.31	0.4	1.88	0	0	0	0	0	0	0	0	0	0	0	0	0	0	0	0	0	0
CYB561D1	1p13.3	6	4.47	6.71	6.29	6.11	2.54	5.51	3.73	8.37	3.63	6.19	10.26	8.29	1.83	8.51	4.31	0.4	1.88	0.03	0	0	0	0	0	0	0	0.19	0	0.18	0	0	0	0	0	0	0
AMIGO1	1p13.3	6.27	4.47	7	6.29	6.51	3.31	5.7	4	8.37	3.63	6.19	10.66	8.29	1.83	8.72	4.31	0.8	2.26	0	0	0	0	0	0	0	0	0	0	0	0	0	0	0	0	0	0
GPR61	1p13.3	5.3	3.47	5.05	5.3	4.14	2.29	5.51	3.47	8.37	3.63	4.96	9.66	6.34	1.83	7.87	3.85	0.6	1.69	0	0	0	0	0	0	0	0	0	0	0	0	0	0	0	0	0	0
GNAI3	1p13.3	9.08	4.96	8.07	6.95	7.69	5.09	7.03	5.33	17.51	8.16	8.67	12.47	13.9	1.63	12.77	7.48	1.21	3.77	0.15	0	0.1	0	0.2	0.51	0	0	0.19	0	0	0.6	0.24	0.2	0	0	0.2	0.38
GNAT2	1p13.3	16.14	11.91	15.06	12.25	13.02	11.2	14.26	8	25.1	10.88	18.05	28.37	23.41	6.5	21.7	14.06	3.42	7.16	0.31	0.5	0.1	0	0.2	0.76	0	0.53	0.78	0	0.35	0.6	0	0.61	0.64	0.23	0.4	0.19
AMPD2	1p13.3	18.3	15.63	17.98	15.56	14.4	12.72	16.73	9.33	26.85	11.18	21.06	33	26.59	6.91	23.19	17.01	3.62	7.72	0.15	0	0.1	0.33	0	0.25	0.19	0	0	0	0.18	0.4	0.24	0.41	0.21	0	0.2	0.19
GSTM2	1p13.3	11.48	10.92	10.59	10.6	8.09	7.89	10.84	6.13	16.93	4.53	13.27	24.14	14.88	5.28	14.04	10.43	2.62	5.27	0.09	0.25	0.39	0	0	0.25	0	0	0	0	0	0	0	0.2	0	0	0	0
GSTM4	1p13.3	14.91	13.15	13.61	13.25	11.83	10.43	13.5	6.4	21.79	8.46	16.99	27.77	22.93	6.1	18.94	12.47	3.22	6.03	0.02	0	0.1	0.33	0	0	0	0	0	0	0	0	0	0	0	0	0	0
GSTM5	1p13.3	16.66	14.39	17.01	14.9	16.17	11.45	15.4	9.33	25.29	9.67	17.88	27.57	20.49	5.08	21.7	14.06	1.81	8.29	0.02	0	0	0	0	0	0	0	0.19	0	0	0	0	0	0	0	0	0
GSTM3	1p13.3	16.32	14.39	17.4	15.23	16.96	12.47	14.64	8.27	21.98	11.78	17.52	26.16	20.24	5.49	20.85	14.51	2.01	7.72	0.07	0	0	0	0.39	0	0	0	0	0.3	0.35	0	0	0	0	0.45	0	0
EPS8L3	1p13.3	19.05	17.12	20.21	16.89	18.93	14.25	17.3	9.87	27.63	12.39	19.82	31.19	24.88	5.89	24.68	17.01	2.62	8.85	0.15	0	0	0.66	0.39	0.25	0.38	0	0.19	0	0.18	0.2	0	0	0.21	0.23	0.4	0
CSF1	1p13.3	10.78	10.17	10.3	9.6	9.47	6.11	9.51	5.07	17.9	10.27	10.8	17.51	11.71	3.46	11.06	9.98	0.6	3.77	0	0	0	0	0	0	0	0	0	0	0	0	0	0	0	0	0	0
AHCYL1	1p13.3	0.55	0.5	0.97	0.33	0.39	1.02	0.76	0.8	0.39	0	0	0.8	0.24	0.2	0.21	0.23	0.2	0.56	0.02	0	0	0	0	0	0.19	0	0	0	0	0	0	0	0	0	0.2	0
ALX3	1p13.3	0.5	0.5	0.68	0.33	0.39	1.02	0.76	0.27	0.58	0	0.18	0.8	0.24	0.2	0.21	0.23	0	0.75	0.2	0.25	0	0.33	0.39	0	0	0	0.58	0.91	0.18	0.2	0	0.41	0	0.45	0.4	0
UBL4B	1p13.3	0.03	0	0	0	0	0	0	0	0	0	0.18	0.2	0	0	0	0	0	0	0	0	0	0	0	0	0	0	0	0	0	0	0	0	0	0	0	0
SLC6A17	1p13.3	11.92	9.18	13.12	8.94	8.88	7.89	13.12	6.67	20.62	9.06	12.04	19.52	13.17	4.47	12.98	11.34	1.81	5.27	0.16	0	0.29	0	0	0.25	0	0	0	0.3	0.18	0.2	0.49	0	0	0	0.4	0.19
KCNC4	1p13.3	9.29	6.95	9.82	5.63	6.71	5.85	9.7	5.33	14.98	7.85	8.85	16.3	10.24	3.46	11.91	8.39	0.8	3.95	0.58	0.25	0.68	0	0.39	1.02	1.33	0.27	0.78	1.21	0.18	0.4	0.24	0.2	0.85	0.68	0.6	0.38
RBM15	1p13.3	6.47	6.95	5.44	6.29	3.55	2.8	6.08	2.13	9.73	7.85	4.78	14.29	7.8	3.05	7.45	6.12	0.8	3.39	0.03	0	0	0	0.2	0	0	0	0	0	0	0	0	0	0	0	0	0
SLC16A4	1p13.3	6.47	6.95	5.44	6.29	3.55	2.8	6.08	2.13	9.73	7.85	4.78	14.29	7.8	3.05	7.45	6.12	0.8	3.39	0.13	0.25	0.1	0	0.39	0	0.19	0.53	0	0	0	0.2	0	0.2	0	0	0.6	0.19
PROK1	1p13.3	4.67	5.21	4.96	3.97	2.17	3.05	3.99	2.13	8.75	3.02	4.42	7.65	7.07	1.22	4.89	3.63	0.4	2.45	0.1	0	0.1	0	0	0.25	0	0	0	0.6	0	0	0.49	0	0	0	0.2	0
KCNA10	1p13.3	10	10.67	9.82	9.27	8.48	7.63	10.08	4.8	13.81	10.57	9.2	16.7	9.02	4.47	12.98	11.56	1.61	3.39	0.64	0.99	0.49	0.33	0.39	0.76	0.95	1.87	0.97	0.6	0.35	0	0.49	0.61	0.64	1.36	0.2	0.19
KCNA2	1p13.3	1.22	1.24	0.97	0.99	0.59	0.51	1.14	0.8	2.53	0.91	0.53	1.81	1.22	0	1.49	1.36	0	0.56	0.14	0	0.29	0.33	0.2	0	0.19	0	0.19	0.3	0.18	0.2	0.24	0.2	0	0	0	0
KCNA3	1p13.3	0.04	0	0.1	0	0	0	0	0	0	0	0.18	0	0	0	0	0	0	0	0.16	0	0	0	0	0.25	0.57	0.53	0	0.3	0.18	0	0.24	0.2	0	0.23	0.2	0.19
CD53	1p13.3	4.17	3.97	5.64	2.98	4.14	2.54	1.9	2.4	4.86	4.53	2.65	4.63	6.59	1.42	5.11	2.95	1.01	1.69	0.04	0	0.1	0	0	0	0.19	0	0.19	0	0	0	0	0	0.21	0	0	0
DRAM2	1p13.3	4.73	0.74	6.51	5.96	4.73	4.07	3.23	3.73	6.81	4.23	3.54	4.83	7.8	1.83	3.19	4.54	1.41	2.26	0.06	0	0.1	0	0	0	0	0	0	0	0.18	0.2	0.24	0	0	0	0	0.19
CEPT1	1p13.3	14.28	10.92	13.12	15.89	11.24	8.91	15.78	6.93	22.37	13.9	13.27	24.75	18.78	5.28	18.72	13.38	2.21	6.59	0	0	0	0	0	0	0	0	0	0	0	0	0	0	0	0	0	0
DENND2D	1p13.3	20.29	19.35	18.95	19.87	17.16	14.76	21.67	8.53	29.96	18.73	20.71	34.21	25.61	6.5	25.74	17.23	4.02	10.17	0.04	0	0.1	0	0	0	0	0	0.19	0	0	0	0.24	0	0	0	0.2	0
CHI3L2	1p13.3	18.4	17.12	17.3	16.56	16.57	13.74	19.58	8.53	27.24	16.31	19.29	30.58	23.17	6.3	22.13	14.06	4.02	9.6	0.02	0	0	0	0	0	0	0	0	0	0	0	0.24	0	0	0	0.2	0
CHIA	1p13.2	14.6	18.61	15.45	12.91	11.64	8.4	14.45	8.8	22.76	11.48	13.45	22.94	17.32	6.1	18.09	12.7	2.41	5.65	0.2	0	0.1	0.33	0.2	0.25	0	0	0.39	0.6	0.18	0	0.24	0	0.43	0.45	0.2	0.19
OVGP1	1p13.2	16.24	15.38	20.41	22.52	14.99	11.45	13.5	8	22.18	14.8	15.75	25.96	16.59	5.69	19.36	14.51	2.01	9.98	0.19	0.25	0.1	0	0	0	0.38	0.27	0	0.3	0.35	0.4	0.24	0.2	0.64	0.23	0	0
WDR77	1p13.2	21.07	20.1	23.91	25.83	19.72	14.5	17.3	11.47	27.24	19.34	22.3	31.19	25.85	7.93	25.32	19.95	4.43	13.18	0.01	0	0	0	0.2	0	0	0	0	0	0	0	0	0	0	0	0	0
ATP5F1	1p13.2	22.42	22.08	25.36	26.82	20.71	15.52	19.39	12.27	29.18	20.24	23.72	33.8	26.83	8.54	27.45	20.86	5.03	14.31	0.02	0	0.1	0	0	0	0	0	0	0	0	0	0	0	0	0	0.2	0
C1orf162	1p13.2	18.67	18.61	19.05	23.51	17.16	11.45	16.92	10.13	27.24	16.92	19.47	27.77	22.68	6.5	23.19	17.23	4.23	10.55	0.04	0.25	0.1	0	0	0	0	0	0	0	0	0.2	0	0	0	0	0	0
ADORA3	1p13.2	14.32	13.65	13.7	12.58	11.24	8.91	12.55	7.73	19.65	13.9	14.87	22.33	17.56	4.67	18.94	14.29	3.82	7.34	0.07	0	0	0.33	0	0	0	0	0	0	0.53	0	0	0.2	0.21	0	0	0
RAP1A	1p13.2	4.09	2.98	5.44	2.32	3.75	2.8	2.47	1.6	5.25	4.83	3.36	5.23	5.12	0.81	4.04	4.08	0.2	0.56	0	0	0	0	0	0	0	0	0	0	0	0	0	0	0	0	0	0
DDX20	1p13.2	12.05	11.91	12.73	10.93	8.09	8.65	14.26	6.4	15.37	9.67	13.1	21.33	15.37	4.06	18.72	12.47	1.61	4.9	0.14	0.25	0	0	0.39	0	0.38	0	0	0	0.53	0	0	0	0	0	0.2	0
KCND3	1p13.2	6.83	5.71	6.22	5.63	4.34	3.31	7.41	2.13	11.09	5.14	6.73	12.68	7.56	2.03	10.64	8.84	0.6	1.69	0.29	0.74	0.29	0	0.59	0	0	0.53	0.39	0	0.18	0.6	0.49	0	0.21	0.45	0.4	0.38
CTTNBP2NL	1p13.2	6.77	5.21	6.32	6.29	5.33	3.82	7.98	2.93	12.65	5.14	6.37	11.67	8.54	1.83	8.94	5.44	0.2	2.26	0.01	0	0	0	0	0	0.19	0	0	0	0	0	0	0	0	0	0	0
WNT2B	1p13.2	10.31	8.93	11.37	8.94	9.66	6.11	10.46	4.53	18.68	8.16	9.03	15.29	12.44	2.64	11.06	9.3	1.21	4.33	0.09	0.74	0.19	0	0	0	0	0	0	0.3	0	0.2	0	0.2	0	0	0	0
ST7L	1p13.2	7.76	6.2	7.97	4.64	6.71	3.82	9.89	2.4	13.42	6.34	7.43	11.87	8.05	2.03	8.72	6.8	0.6	3.2	0.09	0	0.1	0	0.2	0	0.19	0	0	0.3	0	0	0	0	0.21	0	0.4	0
CAPZA1	1p13.2	11.16	9.93	10.5	10.6	10.06	9.16	9.51	4	16.15	9.97	10.8	16.9	15.12	4.06	14.26	9.98	1.81	6.4	0.01	0	0	0	0	0	0	0	0	0	0.18	0	0	0	0	0	0	0
MOV10	1p13.2	16.07	15.38	16.04	17.55	15.78	13.49	15.02	7.73	22.37	14.2	15.93	22.74	22.68	6.1	17.66	13.61	4.02	8.47	0.28	0	0.1	0	0.59	0	0.19	0	0.19	0.6	0.53	0.8	0.24	0.2	0.21	0.45	0	0.38
RHOC	1p13.2	15.04	14.14	15.16	16.56	14.4	11.96	14.07	6.67	20.43	13.6	15.58	21.73	20	5.69	16.6	12.47	3.62	7.72	0.02	0	0	0	0.2	0	0	0	0	0.3	0	0	0	0	0	0	0	0
PPM1J	1p13.2	14.67	14.64	13.8	15.23	14.4	12.21	14.26	7.47	21.79	12.39	13.45	20.93	21.46	5.28	16.81	12.47	3.42	6.78	0.1	0	0.29	0	0	0	0	0	0.39	0.6	0	0	0.49	0	0	0.23	0	0
FAM19A3	1p13.2	14.84	14.64	14.38	15.56	14.2	12.21	14.83	7.47	21.79	12.99	13.63	21.33	21.22	5.49	16.81	12.47	3.42	7.16	0.01	0	0	0	0	0	0	0	0	0	0	0	0	0	0	0	0	0
SLC16A1	1p13.2	4.51	3.47	4.37	5.3	3.35	2.8	5.89	2.4	7.78	4.53	3.19	7.24	5.37	0.41	5.96	3.63	0.2	1.32	0.04	0	0.1	0	0	0	0	0	0	0	0.18	0	0	0	0.21	0	0	0
LRIG2	1p13.2	6.32	4.22	6.03	7.28	8.68	5.34	5.32	3.47	8.75	3.32	6.9	9.66	6.83	2.03	7.02	5.67	1.61	3.58	0.08	0	0	0	0	0	0	0.27	0	0	0.18	0.2	0	0	0.21	0	0.2	0
MAGI3	1p13.2	9.55	6.45	8.36	7.62	11.24	3.82	8.56	6.13	15.18	10.27	8.5	15.49	11.95	2.03	12.98	7.26	1.61	3.2	0.06	0.25	0.1	0	0	0	0	0	0	0	0	0.2	0	0.2	0	0.23	0.2	0
PHTF1	1p13.2	11.38	9.68	9.72	9.93	10.26	5.34	12.55	6.4	16.73	9.06	11.15	20.52	14.15	4.27	14.89	13.15	2.01	4.71	0.1	0	0	0	0.39	0	0	0.53	0.39	0	0	0	0	0	0	0	0.2	0
RSBN1	1p13.2	9.25	6.95	8.26	9.6	9.27	4.33	9.32	5.87	13.81	6.95	8.5	14.89	13.41	2.24	10.85	10.43	1.01	2.82	0.02	0	0	0	0	0	0	0	0	0	0	0	0	0	0	0	0.2	0.19
PTPN22	1p13.2	4.51	2.98	4.57	5.3	5.72	2.04	2.66	2.93	6.42	4.53	3.36	7.44	4.88	0.81	5.32	2.49	0.2	1.69	0.2	0	0.19	0	0.79	0	0.19	0.53	0.58	0.3	0.18	0.2	0	0	0.21	0	0	0.19
BCL2L15	1p13.2	11.17	8.19	10.59	11.59	10.06	6.36	10.65	4.53	19.26	10.88	9.03	20.52	12.2	1.83	13.83	10.88	0.6	4.14	0.01	0	0	0.33	0	0	0	0	0	0	0	0	0	0	0	0	0	0
AP4B1	1p13.2	10.51	7.69	10.01	11.26	8.68	6.11	10.46	4.27	18.09	9.97	8.67	19.72	11.22	1.63	12.98	9.98	0.6	3.95	0.13	0.25	0.29	0	0	0.25	0.38	0.27	0	0	0	0.4	0	0.2	0	0	0	0
DCLRE1B	1p13.2	10.46	7.94	9.72	11.26	8.88	6.11	10.46	4.27	18.29	9.97	8.67	19.32	10.73	1.63	12.55	10.2	0.6	4.14	0.17	0.25	0	0	0.2	0.25	0	0	0.19	0.3	0.71	0.2	0	0	0	0	0.6	0.19
HIPK1	1p13.2	11.22	6.45	10.69	11.26	10.06	6.11	11.41	4.53	17.51	13.6	8.67	19.11	15.12	2.64	13.83	12.24	1.01	5.65	0.01	0	0	0	0	0	0	0	0	0	0	0	0	0	0	0	0.2	0
OLFML3	1p13.2	8.97	4.47	8.55	7.62	8.48	3.82	8.37	3.47	15.37	9.06	7.08	17.1	12.93	2.24	11.06	9.3	0.6	4.33	0.16	0.25	0.1	0	0.59	0.51	0.19	0	0.19	0.3	0	0	0.24	0.41	0	0.45	0	0
SYT6	1p13.2	8.08	6.2	6.8	8.61	7.89	4.83	7.22	4	14.2	5.44	8.85	16.1	10.49	1.22	9.15	6.12	0.2	3.58	0.04	0	0	0	0	0	0	0	0.19	0.3	0	0	0	0	0	0	0.2	0.19
TRIM33	1p13.2	9.03	6.95	8.07	8.61	6.9	7.38	9.51	4.27	13.62	5.14	7.79	16.9	8.05	1.63	14.04	9.52	0.8	4.52	0.03	0	0	0	0	0	0	0	0	0	0	0	0	0	0	0	0	0
BCAS2	1p13.2	7.07	5.21	7.77	7.28	8.28	4.07	5.7	4	11.87	6.95	5.31	9.26	8.54	1.22	7.45	6.58	0.2	2.26	0	0	0	0	0	0	0	0	0	0	0	0	0	0	0	0	0	0
DENND2C	1p13.2	9.56	8.68	9.33	5.63	8.48	4.83	11.79	3.73	19.07	6.65	9.2	16.5	10.73	1.02	12.55	8.62	0.6	3.39	0.06	0	0	0	0	0	0.19	0.27	0	0	0	0.2	0	0	0.21	0	0.2	0
NRAS	1p13.2	1.6	0.74	2.04	1.99	1.78	1.53	2.28	0.27	3.7	0.6	1.24	2.21	1.95	0	2.34	1.36	0	0.56	0	0	0	0	0	0	0	0	0	0	0	0	0	0	0	0	0	0
CSDE1	1p13.2	2.12	0.99	2.72	2.65	1.78	1.78	2.47	0.53	4.09	3.02	1.24	2.41	2.44	0.2	2.77	2.04	0	1.13	0	0	0	0	0	0	0	0	0	0	0	0	0	0	0	0	0	0
SIKE1	1p13.2	1.64	0.74	1.75	1.66	1.18	1.27	1.71	0.27	3.89	3.02	1.06	1.81	1.95	0.2	2.34	1.59	0	0.94	0	0	0	0	0	0	0	0	0	0	0	0	0	0	0	0	0	0
SYCP1	1p13.2	7.28	6.2	7.48	8.94	5.92	4.07	7.03	5.33	10.51	5.44	6.02	10.26	6.1	3.05	11.06	7.48	2.01	3.77	0.03	0.5	0	0	0	0	0	0	0	0	0.18	0	0	0	0	0	0	0
TSHB	1p13.2	5.37	5.21	5.34	4.64	5.33	3.05	6.08	4.53	8.37	3.02	4.42	9.26	4.39	1.63	7.45	4.08	0	2.45	0.06	0	0	0.33	0	0	0	0.27	0	0	0	0	0	0	0	0	0	0
TSPAN2	1p13.2	4.94	4.47	4.86	4.3	4.93	2.8	5.89	4	7.98	3.02	3.89	8.05	4.39	1.22	6.38	3.63	0	2.07	0.23	0.5	0.19	0.33	0	0.25	0.38	0.8	0.19	0	0.18	0.2	0	0.2	0.43	0.23	0.4	0
NGF	1p13.2	4.45	3.23	3.3	2.65	2.76	3.05	4.56	0.53	8.56	3.93	5.49	8.45	4.88	0.81	6.17	4.99	0	2.82	0.05	0	0	0	0	0.25	0.19	0	0	0	0	0	0	0	0.21	0.23	0	0
VANGL1	1p13.1	13.43	12.41	13.99	12.91	11.64	8.4	14.07	8.53	23.35	12.99	14.69	16.9	16.83	2.64	15.11	11.34	1.41	6.59	0.42	0.5	0.29	0.99	0.39	0.25	0.57	0.27	0	0	0.71	0.2	0	0.81	0.43	0.68	0.8	0.38
CASQ2	1p13.1	14.19	11.91	14.48	15.23	12.82	9.41	14.45	9.07	22.76	13.6	14.69	20.32	16.34	3.05	16.81	13.61	1.21	6.03	0.21	0.25	0.1	0	0	0.25	0.57	0.27	0	0	0.18	0.4	0.24	0	0.21	0.68	0.2	0.19
ATP1A1	1p13.1	2.68	2.23	2.92	3.31	2.96	2.04	3.23	1.6	4.86	1.51	4.07	4.23	1.71	0.81	1.91	1.13	0.2	2.45	0.08	0	0	0.33	0	0	0.19	0	0.19	0	0	0.2	0	0.2	0	0.23	0	0
CD58	1p13.1	3.58	1.99	3.21	3.97	2.37	2.29	4.18	1.6	5.84	3.93	2.83	8.45	3.66	1.02	2.98	3.4	0	2.07	0	0	0	0	0	0	0	0	0	0	0	0	0	0	0	0	0	0
IGSF3	1p13.1	3.84	2.23	3.69	3.97	2.37	2.54	4.56	1.87	6.23	4.23	2.83	8.65	3.9	1.02	3.19	3.85	0	2.07	0.01	0	0	0	0	0	0	0	0.19	0	0	0	0	0	0	0	0	0
CD2	1p13.1	2.04	2.73	2.82	1.99	2.17	1.27	3.04	0.53	1.95	2.72	1.24	3.02	0.98	0.41	1.7	2.49	0.2	1.69	0.06	0	0.1	0	0.2	0	0.19	0	0.19	0	0	0.2	0	0	0	0	0	0
PTGFRN	1p13.1	7.94	5.46	6.22	8.61	6.51	3.82	7.98	4.8	14.98	8.46	8.67	13.08	9.51	2.24	8.09	8.39	1.21	3.58	0	0	0	0	0	0	0	0	0	0	0	0	0	0	0	0	0	0
CD101	1p13.1	16.11	15.38	13.61	17.22	14	10.43	17.3	10.13	26.07	14.8	16.64	25.35	15.61	4.47	19.57	18.14	2.41	7.72	0.2	0	0.1	0.33	0.39	0.25	0.38	0.27	0	0	0.35	0.2	0.24	0.81	0	0.23	0	0
TTF2	1p13.1	16.72	13.65	15.16	17.88	14.79	12.21	18.63	8	25.68	13.29	16.99	29.18	21.22	3.86	22.13	16.55	1.21	8.47	0.73	1.49	0.68	0.66	0	1.02	0.38	1.33	0.78	0.91	0.71	0.4	0.98	1.22	0.85	0.23	0.6	0.94
TRIM45	1p13.1	16.57	13.15	15.65	17.88	15.58	11.2	17.49	8.53	25.29	11.48	16.81	29.18	20.98	3.86	20.21	15.87	2.01	8.66	0.34	0.5	0.39	0.33	0.59	0.25	0.19	0.27	0.58	0.3	0.35	0	0.98	0	0	0.91	0.4	0.19
VTCN1	1p13.1	3.44	3.47	3.69	3.31	4.14	1.78	2.28	2.13	4.67	4.23	5.49	3.82	3.17	0.81	2.55	2.27	0.8	2.26	0.03	0	0.1	0	0	0	0	0	0	0	0	0	0	0	0	0	0.2	0
MAN1A2	1p12	3.99	3.47	4.86	4.64	3.94	1.53	3.42	2.4	6.23	3.93	3.89	4.43	3.17	1.02	4.04	4.31	1.41	1.13	0.02	0	0	0	0.2	0	0	0	0	0	0	0	0	0	0	0	0	0.19
FAM46C	1p12	8.13	6.2	7.97	8.61	7.69	4.83	8.17	3.73	13.62	7.55	8.5	13.48	8.54	1.42	10.21	8.62	0.2	2.26	0	0	0	0	0	0	0	0	0	0	0	0	0	0	0	0	0	0
GDAP2	1p12	2.7	1.49	2.53	2.32	2.17	2.29	3.61	1.6	5.25	1.81	2.65	3.62	2.2	0.2	2.98	3.4	0	1.51	0.08	0.25	0	0.33	0	0	0	0.27	0	0	0	0	0	0	0.21	0.23	0.2	0
WDR3	1p12	6.17	4.47	5.54	5.96	4.54	3.56	7.41	3.47	10.51	8.46	6.02	9.05	5.37	1.22	5.96	6.58	0.8	3.2	0.41	0.5	0.58	0.99	0.2	0.76	0	0.27	0.19	0.3	0.35	0.2	0.49	0.2	0	0.68	0.2	0.19
SPAG17	1p12	13.73	12.16	10.79	10.93	10.26	7.63	16.16	6.4	23.74	13.6	13.81	23.94	15.61	2.64	18.72	13.61	1.81	6.03	0.07	0.25	0	0.33	0	0	0	0	0	0.3	0	0	0.24	0.2	0.21	0	0	0
TBX15	1p12	7.51	5.21	5.25	5.63	4.93	5.6	8.94	4.27	12.84	5.74	8.85	11.67	7.56	3.46	8.94	6.58	1.41	3.2	0.26	0.74	0.19	0.33	0.39	0.25	0.19	0.53	0.39	0	0.35	0.4	0	0.2	0.21	0	0	0
WARS2	1p12	2.29	1.49	1.46	1.99	2.56	1.02	1.52	1.07	3.7	1.81	1.59	4.02	3.41	0.81	2.98	2.27	0.4	0.56	0	0	0	0	0	0	0	0	0	0	0	0	0	0	0	0	0	0
HAO2	1p12	6.98	7.94	6.22	6.95	4.93	3.31	6.46	4.53	11.09	4.53	6.55	12.47	7.07	1.83	10	6.12	0.8	3.58	0.08	0	0	0	0	0	0.19	0.27	0.19	0.3	0.18	0	0	0	0	0	0.2	0
HSD3B2	1p12	6.98	7.94	6.22	6.95	4.93	3.31	6.46	4.53	11.09	4.53	6.55	12.47	7.07	1.83	10	6.12	0.8	3.58	0.17	0	0.1	0	0.2	0.25	0.38	0.53	0	0	0	0.2	0	0.41	0	0	0.2	0
HSD3B1	1p12	5.03	3.97	4.66	3.97	2.56	5.85	5.89	1.33	9.34	3.63	3.01	7.85	4.39	0.81	7.87	4.08	0.4	3.39	0.37	0	0.29	0	0.39	0.25	0.57	1.07	0.39	0.3	0.53	0.2	0.24	0	1.28	0	0.4	0.19
PHGDH	1p12	7.91	7.69	7.68	6.29	5.92	4.83	6.08	4.8	13.62	6.65	8.5	13.08	9.02	2.44	12.13	5.22	1.21	4.33	0.32	0	0.29	0.66	0.79	0.25	0.19	0.53	0.39	0.3	0.35	0	0.49	0	0.43	0.91	0.6	0.19
HMGCS2	1p12	9.09	8.93	9.52	7.95	6.9	5.09	6.84	4.8	15.76	7.25	9.73	14.69	10.24	2.44	12.98	7.26	1.21	5.08	0.4	0.5	0.58	0	0.59	0.25	1.14	0.27	0.19	0.3	0.35	0.2	0.24	0.2	0.21	0.45	0.6	0.56
REG4	1p12	2.22	2.48	3.11	2.32	1.97	0.76	1.9	1.6	3.7	0.6	1.59	3.22	2.93	0.41	2.13	2.95	0	1.88	0.09	0	0.1	0	0.2	0	0.19	0	0	0.6	0.18	0	0	0	0	0.23	0	0
ADAM30	1p12	6.1	5.21	5.54	8.61	4.93	4.33	6.84	3.47	10.7	6.34	6.02	9.05	4.88	1.63	5.74	6.12	0.2	4.52	0.05	0	0	0	0	0	0	0	0	0	0	0	0	0	0.21	0.23	0.2	0.38
NOTCH2	1p12	6.76	4.96	6.41	9.27	6.11	4.83	7.79	3.47	11.28	8.46	6.55	9.66	6.34	1.63	5.96	6.8	1.01	5.65	0.37	0	0.49	0.99	0.2	0.76	0.76	0.27	0.19	0.3	0.35	0.4	0.24	0	0.21	0.23	0.4	0.19
ACP6	1q21.2	14.37	22.58	22.55	17.22	12.82	11.2	11.79	5.6	3.11	21.45	16.81	14.49	18.54	4.06	19.36	12.7	3.62	15.63	0.03	0	0	0	0	0	0	0.27	0.19	0	0	0	0	0	0.21	0	0	0
ANKRD34A	1q21.1	0.37	0	0.1	0.33	0.79	0.76	0.19	0.53	0	0.6	0.71	0.2	0.73	0	0.21	0.23	0	0.75	0	0	0	0	0	0	0	0	0	0	0	0	0	0	0	0	0	0
ANKRD35	1q21.1	15.09	21.09	21.28	15.23	12.23	11.96	14.83	6.13	3.7	21.75	18.94	17.71	19.51	4.47	21.06	14.74	2.82	18.08	0.45	0.99	0.29	0	0.39	0.25	0.76	0.53	0.78	0	0.53	0.2	0.24	0.41	0.43	0.23	0.8	0.38
BCL9	1q21.2	7.57	12.16	11.37	6.62	5.52	5.34	7.6	3.47	2.14	12.08	8.67	6.64	9.76	1.83	10	7.48	1.41	8.29	0.06	0	0.19	0	0	0.25	0	0.27	0	0	0	0	0	0	0.21	0.23	0	0
CD160	1q21.1	0.24	0.25	0.39	0	0.2	0	0	0.27	0	0.6	0	0.4	0	0.2	0.64	0.45	0	0	0.09	0.25	0.1	0	0	0	0	0.27	0	0	0	0	0	0.2	0	0.91	0.2	0
CHD1L	1q21.1	16.37	20.6	24.2	20.86	13.41	8.91	13.5	7.73	6.42	31.12	17.88	18.11	22.2	7.72	20.64	14.51	4.43	18.08	0.71	0.74	0.97	0.66	0.2	2.04	0.19	1.33	0.97	0.91	0.18	0.6	0.73	0.41	0.64	0.45	0.6	0.75
FCGR1A	1q21.2	0.13	0	0.39	0	0	0	0	0	0	0	0.18	0.2	0.73	0	0	0	0	0.56	0	0	0	0	0	0	0	0	0	0	0	0	0	0	0	0	0	0
FCGR1B	1p11.2	0.37	0	0.58	0.66	0	0	0.57	0	0.39	0.91	0	0.6	0.73	0	0	0	0.2	0.19	0	0	0	0	0	0	0	0	0	0	0	0	0	0	0	0	0	0
FMO5	1q21.1	4.12	5.71	6.61	3.64	3.55	1.53	2.66	2.93	0.78	12.08	3.01	3.62	4.88	1.22	4.68	4.54	0	4.71	0.22	0.25	0.1	0.33	0	0	0	0.53	0	0.91	0	0.4	0.49	0	0	0.23	0.2	0.19
GJA5	1q21.2	0.2	0.25	0.49	0	0.2	0.25	0	0.27	0	0.6	0.18	0	0	0	0.21	0.68	0	0	0.2	0.5	0.19	0.66	0.39	0.25	0.19	0.27	0	0	0.53	0	0.24	0.41	0.21	0	0	0.19
GJA8	1q21.2	0.77	0.5	1.85	0.66	0	0.25	0	0.53	0	1.51	0.71	1.21	1.71	0	1.28	0.45	0	1.13	0.39	0.74	0.19	0.33	0	0.51	0.76	0.53	0.58	0.91	0.71	0	0	0.61	0.43	0.23	0.2	0.56
GPR89B	1q21.2	0.02	0	0	0	0	0	0	0	0	0	0	0	0	0	0	0.23	0	0	0.05	0	0	0	0.2	0	0	0	0.19	0	0	0	0.24	0	0	0	0	0
HFE2	1q21.1	0.44	0.25	0.39	0.66	0.79	0.76	0.19	0.27	0	0.91	0.53	0.2	0.49	0.2	0.43	0.68	0	0.75	0.25	0.25	0.58	0	0.39	0	0.19	0.27	0.19	0	0.35	0.2	0.49	0.41	0.43	0	0	0.38
HIST2H2AB	1q21.2	12.04	16.13	19.92	12.91	8.88	7.63	10.65	5.6	3.31	21.15	14.69	12.68	15.37	3.86	13.19	10.2	3.22	15.25	0.02	0	0	0	0.2	0	0	0	0	0	0	0	0	0.2	0	0	0	0
HIST2H2AC	1q21.2	12.04	16.13	19.92	12.91	8.88	7.63	10.65	5.6	3.31	21.15	14.69	12.68	15.37	3.86	13.19	10.2	3.22	15.25	0.01	0	0	0	0.2	0	0	0	0	0	0	0	0	0	0	0	0	0
HIST2H2BE	1q21.2	9.33	14.14	15.84	9.93	6.51	5.85	7.79	4.27	1.56	17.52	11.15	10.26	10.49	3.25	9.79	7.71	2.01	12.62	0.01	0	0	0	0	0	0	0	0	0	0	0	0	0	0.21	0	0	0
HIST2H2BF	1q21.2	0.13	0	0.39	0	0	0	0	0	0	0	0.18	0.2	0.73	0	0	0	0	0.56	0	0	0	0	0	0	0	0	0	0	0	0	0	0	0	0	0	0
ITGA10	1q21.1	15.01	20.84	20.99	15.23	12.23	11.96	14.45	6.13	3.7	21.75	19.11	17.91	19.51	4.27	20.64	14.97	2.82	18.08	0.26	0.25	0.39	0	0.39	0	0.19	0.53	0.19	0	0.35	0.2	0.24	0	0.21	0.23	0.2	0.38
LIX1L	1q21.1	6.25	8.19	9.23	4.64	5.13	6.11	5.51	3.47	0.19	10.27	6.9	8.45	10.24	1.63	7.66	5.9	0.4	6.97	0.01	0	0	0	0	0	0	0	0	0	0	0	0	0	0	0	0.2	0
NBPF15	1q21.2	0.14	0	0.19	0	0	0	0.19	0	0	0.3	0.35	0	0	0	0.21	0	0	0.56	0	0	0	0	0	0	0	0	0	0	0	0	0	0	0	0	0	0
NOTCH2NL	1q21.1	0.02	0	0	0	0	0	0	0.27	0	0	0	0	0.24	0	0	0	0	0	0	0	0	0	0	0	0	0	0	0	0	0	0	0	0	0	0	0
NUDT17	1q21.1	12.78	17.12	18.46	12.58	10.45	9.41	12.74	4.8	3.5	19.34	15.4	14.69	15.37	3.46	17.66	12.24	2.41	15.82	0	0	0	0	0	0	0	0	0	0	0	0	0	0	0	0	0	0
PDE4DIP	1q21.1	2.53	2.98	5.25	2.98	1.18	0.76	2.66	1.07	0.58	3.93	1.42	2.01	1.95	0.81	4.47	2.04	0.6	2.82	0.11	0.25	0.1	0.33	0	0	0.19	0.27	0	0	0	0.2	0.24	0	0	0	0.2	0.19
PDZK1	1q21.1	0.21	0.25	0.39	0	0	0	0	0.27	0	0.3	0	0.4	0	0.2	0.43	0.45	0	0	0.04	0	0	0	0	0	0.19	0	0.19	0	0	0	0	0	0	0	0	0
PEX11B	1q21.1	14.79	20.84	20.6	14.9	12.03	11.96	14.45	5.87	3.7	21.15	18.76	17.71	19.27	4.27	20	14.74	2.82	18.27	0.04	0	0	0	0	0.25	0	0	0	0	0	0	0	0.2	0	0	0	0
PIAS3	1q21.1	14.91	20.84	21.09	15.23	12.23	11.7	14.64	5.87	3.7	21.15	18.58	17.71	19.27	4.27	21.06	14.74	2.82	18.08	0.01	0	0	0	0	0	0	0.27	0	0	0	0	0	0	0	0	0	0
POLR3C	1q21.1	11.77	15.88	16.81	11.26	9.07	9.16	11.79	4	3.5	18.73	14.51	14.08	14.39	3.46	16.81	10.43	2.62	13.94	0.07	0	0.1	0	0.2	0.25	0	0	0	0.3	0.18	0	0	0.2	0	0	0	0
POLR3GL	1q21.1	0.84	0.74	1.36	0.99	0.99	1.27	0.38	0.27	0	1.51	1.06	0.4	0.73	0.2	0.64	0.91	0	1.88	0.03	0	0	0	0	0	0.19	0	0	0	0.18	0.2	0	0	0	0	0	0
PRKAB2	1q21.1	3.23	5.21	5.83	2.32	2.37	1.02	2.09	2.67	0.39	8.46	1.77	2.62	3.66	1.22	3.19	3.63	0	3.39	0.03	0	0	0	0	0.25	0	0	0	0	0	0	0.24	0	0	0	0	0
RBM8A	1q21.1	7.19	9.93	11.47	6.62	5.72	5.85	6.46	3.73	0.19	9.97	7.96	9.46	11.46	1.83	8.09	6.35	0.4	9.04	0	0	0	0	0	0	0	0	0	0	0	0	0	0	0	0	0	0
RNF115	1q21.1	0.23	0.5	0.39	0	0.2	0.25	0.38	0	0	0.3	0.35	0.2	0	0	0.64	0.23	0	0.19	0.02	0	0	0	0	0	0	0	0	0	0	0	0	0	0.21	0.23	0	0
SV2A	1q21.2	12.04	16.13	19.92	12.91	8.88	7.63	10.65	5.6	3.31	21.15	14.69	12.68	15.37	3.86	13.19	10.2	3.22	15.25	0.01	0	0	0	0	0	0	0	0	0	0.18	0	0	0	0	0	0	0
TXNIP	1q21.1	0.48	0.25	0.39	0.66	0.79	0.76	0.19	0.27	0	0.91	0.71	0.2	0.49	0.2	0.43	0.68	0	1.13	0.02	0	0	0	0.2	0	0	0	0.19	0	0	0	0	0	0	0	0	0
SF3B4	1q21.2	12.04	16.13	19.92	12.91	8.88	7.63	10.65	5.6	3.31	21.15	14.69	12.68	15.37	3.86	13.19	10.2	3.22	15.25	0	0	0	0	0	0	0	0	0	0	0	0	0	0	0	0	0	0
MTMR11	1q21.2	12.04	16.13	19.92	12.91	8.88	7.63	10.65	5.6	3.31	21.15	14.69	12.68	15.37	3.86	13.19	10.2	3.22	15.25	0.48	0.74	0.1	1.66	0.59	0.25	0.38	0.27	0.97	0.3	0.35	0.4	0	0	0.85	1.36	0.2	0.75
VPS45	1q21.2	2.05	3.47	3.69	2.65	1.97	1.27	0.76	0.53	0.39	3.32	1.42	1.61	2.2	0.2	2.34	2.04	0.2	3.77	0.55	0.5	0.29	0.33	0.59	0.51	0.76	0.53	0.58	0.3	0.53	0.2	0.24	0.41	0.85	0.91	0.8	0.38
PLEKHO1	1q21.2	3.32	4.71	4.66	3.64	3.16	2.54	2.28	1.87	0.19	5.14	4.96	4.02	5.61	0.41	4.04	3.85	0.6	4.33	0	0	0	0	0	0	0	0	0	0	0	0	0	0	0	0	0	0
ANP32E	1q21.2	8.63	12.41	13.31	9.93	6.9	4.83	7.03	5.07	1.75	13.9	10.8	11.47	11.95	2.44	10	5.67	1.61	10.55	0	0	0	0	0	0	0	0	0	0	0	0	0	0	0	0	0	0
CA14	1q21.2	10.54	14.64	16.62	13.58	8.88	6.62	8.17	5.33	1.75	16.62	13.1	14.49	14.63	2.85	11.49	6.58	2.01	13.37	0.21	0.25	0.29	0.66	0.2	0	0.19	0	0.19	0	0	0.2	0.24	0.61	0.64	0	0.4	0.19
C1orf54	1q21.2	11.18	15.38	17.59	14.24	9.27	7.63	8.75	5.33	1.75	17.52	13.45	14.69	15.85	3.05	12.55	7.48	2.01	13.75	0	0	0	0	0	0	0	0	0	0	0	0	0	0	0	0	0	0
MRPS21	1q21.2	7.05	9.68	12.44	9.27	6.71	5.34	3.99	2.4	0.19	9.37	8.67	8.25	11.22	2.44	7.66	4.76	1.01	9.79	0	0	0	0	0	0	0	0	0	0	0	0	0	0	0	0	0	0
PRPF3	1q21.2	4.79	6.2	8.65	6.29	4.34	3.82	2.66	1.87	0.19	6.04	4.78	5.43	7.32	1.83	4.68	3.63	0.8	8.1	0.09	0.25	0.1	0	0	0.25	0.19	0.27	0	0	0	0	0	0	0	0	0	0
TARS2	1q21.3	10.64	13.15	18.95	11.92	9.47	5.85	6.27	5.87	0	18.13	10.44	11.67	15.61	2.85	12.13	10.43	2.01	17.14	0.2	0	0.29	0	0.2	0	0.57	0.53	0	0.6	0	0	0	0	0.21	0.23	0.2	0.38
ECM1	1q21.3	15.1	19.85	26.24	18.21	13.02	9.41	9.51	6.93	0.39	24.77	16.11	16.5	22.68	3.86	18.09	14.74	2.62	22.22	0.35	0	0.1	0	0.39	0	0.76	0	0.58	0.6	0.53	0.6	0	0.41	0.21	0.45	0.4	0.19
ADAMTSL4	1q21.3	13.06	16.63	22.93	14.9	10.65	8.14	8.56	4.8	0.58	21.45	14.51	14.49	18.54	2.64	16.17	13.15	1.81	19.21	0.22	0	0.19	0.33	0.2	0.76	0.19	0	0.19	0	0.71	0.6	0.24	0	0.43	0	0.2	0
MCL1	1q21.3	8.83	12.66	15.74	9.93	6.31	5.34	5.7	2.67	0.58	13.6	10.8	9.86	11.22	1.83	11.28	7.94	1.01	12.24	0	0	0	0	0	0	0	0	0	0	0	0	0	0	0	0	0	0
ENSA	1q21.3	1.48	1.74	2.72	0.99	1.38	1.02	1.71	0	0.19	3.63	1.59	1.81	2.44	0.2	2.77	0	0.4	1.88	0.02	0	0	0	0	0	0	0	0	0	0.18	0	0	0	0	0	0	0
GOLPH3L	1q21.3	9.13	14.64	13.99	8.28	6.51	5.6	6.65	1.6	1.17	16.62	10.97	10.87	13.9	2.85	15.32	6.8	1.21	12.43	0.2	0.5	0.1	0	0.2	0	0.38	0.27	0.19	0	0	0.2	0.24	0.41	0.43	0	0.4	0.19
HORMAD1	1q21.3	9.9	15.38	15.55	9.27	7.3	6.11	6.65	1.87	1.56	18.13	11.68	12.07	14.15	3.25	15.53	7.94	1.01	13.94	0.04	0	0	0	0.2	0	0	0	0.19	0	0	0.2	0	0	0.21	0	0	0
CTSS	1q21.3	10.43	15.88	16.13	10.26	8.09	6.36	7.41	1.87	1.75	18.13	12.57	12.47	15.61	3.25	15.96	8.16	1.01	14.88	0.1	0	0.1	0	0.39	0	0.19	0	0	0	0	0.4	0	0	0.21	0	0.2	0
CTSK	1q21.3	6.92	8.93	12.15	6.62	5.13	4.33	6.46	2.93	0.58	12.39	6.55	6.44	11.22	1.83	9.79	5.44	0.4	9.6	0.14	0	0.1	0.99	0	0	0.19	0	0.58	0.3	0.18	0	0	0	0.21	0.23	0	0.19
ARNT	1q21.3	6.95	8.93	12.34	6.62	5.13	4.33	6.46	2.93	0.58	12.39	6.55	6.44	11.22	1.83	9.79	5.44	0.6	9.6	0.04	0	0.29	0	0	0	0	0.27	0	0	0	0	0	0	0	0	0	0
SETDB1	1q21.3	7.52	11.17	13.12	7.95	5.92	5.34	4.94	1.87	1.36	15.11	8.14	8.05	11.22	2.44	8.3	6.58	0.6	10.73	0.24	0.25	0.19	0.33	0	0	0	0	0.19	1.21	0.35	0	0.24	0.2	0.21	0	0.4	0.38
ANXA9	1q21.3	15.6	21.84	24.68	18.21	13.21	10.69	10.27	6.4	3.89	24.77	19.11	16.9	20	5.08	19.57	15.87	3.42	22.41	0.08	0.25	0.1	0	0	0	0	0	0	0	0	0.2	0	0.2	0	0.23	0.2	0
FAM63A	1q21.3	17	23.33	27.31	20.53	14.79	11.96	12.74	7.2	4.28	27.79	20.53	18.31	21.46	5.28	20.85	16.33	3.82	22.6	0.24	0.25	0.1	0.33	0.79	0.25	0.19	0.53	0	0.6	0.18	0.2	0	0.2	0.64	0.23	0.2	0.56
PRUNE	1q21.3	17.3	23.33	28.09	19.87	15.38	12.21	12.93	7.47	4.28	27.79	21.24	18.51	21.95	4.88	21.7	16.78	3.82	22.98	0.01	0	0	0	0.2	0	0	0	0	0	0	0	0	0	0	0	0	0
BNIPL	1q21.3	15.18	21.09	25.17	17.55	14	10.18	11.03	6.67	3.11	22.96	20	16.7	18.54	3.66	17.66	13.38	3.82	20.9	0.04	0.25	0	0	0.2	0	0	0	0	0	0	0	0	0.2	0.21	0	0	0
C1orf56	1q21.3	15.07	20.6	24.78	17.22	13.81	9.92	11.03	6.13	3.11	22.96	19.65	16.7	18.78	3.66	17.66	13.38	3.82	21.09	0.03	0	0	0	0.2	0	0	0	0.19	0	0.18	0	0	0	0	0	0	0
CDC42SE1	1q21.3	13.52	17.87	23.03	14.57	11.64	9.16	10.27	4.53	2.72	20.85	17.7	15.29	18.29	3.46	15.32	12.24	3.42	18.83	0.02	0	0	0	0	0	0	0	0	0	0	0.2	0	0	0	0	0	0
MLLT11	1q21.3	13.53	17.87	23.03	14.57	11.64	9.16	10.27	4.53	2.72	20.85	17.7	15.29	18.29	3.46	15.32	12.47	3.42	18.83	0	0	0	0	0	0	0	0	0	0	0	0	0	0	0	0	0	0
GABPB2	1q21.3	8.25	10.17	15.45	9.27	7.3	6.62	7.41	2.67	1.36	12.39	10.27	9.05	14.63	2.24	9.15	6.35	1.01	11.11	0.04	0	0	0	0	0	0.38	0	0.19	0	0	0	0	0	0	0	0.2	0
SEMA6C	1q21.3	8.43	12.66	15.16	9.6	5.92	6.62	6.27	3.2	1.17	12.39	10.8	11.47	11.95	2.03	9.57	6.35	0.6	12.99	0.04	0	0	0	0	0	0	0	0	0	0.18	0	0	0.2	0	0	0.2	0.19
LYSMD1	1q21.3	7.57	10.92	14.09	8.94	4.73	6.11	5.7	3.2	1.17	10.88	9.2	10.66	11.22	1.63	7.45	5.9	0.2	11.49	0	0	0	0	0	0	0	0	0	0	0	0	0	0	0	0	0	0
SCNM1	1q21.3	7.15	10.42	13.12	8.61	4.34	5.85	5.51	2.93	0.78	10.88	8.5	10.06	10.98	1.63	7.23	5.44	0.2	10.55	0	0	0	0	0	0	0	0	0	0	0	0	0	0	0	0	0	0
TNFAIP8L2	1q21.3	7.57	10.92	14.09	8.94	4.73	6.11	5.7	3.2	1.17	10.88	9.2	10.66	11.22	1.63	7.45	5.9	0.2	11.49	0	0	0	0	0	0	0	0	0	0	0	0	0	0	0	0	0	0
TMOD4	1q21.3	7.15	10.42	13.12	8.61	4.34	5.85	5.51	2.93	0.78	10.88	8.5	10.06	10.98	1.63	7.23	5.44	0.2	10.55	0.35	0.25	0.58	0	0.39	0.51	0.19	0.53	0.78	0.6	0	0.6	0	0	0.21	0.45	0.6	0
VPS72	1q21.3	7.22	10.42	13.12	8.61	4.54	5.85	5.51	2.93	0.78	10.88	8.67	10.26	10.98	1.63	7.23	5.44	0.2	10.73	0.01	0	0.1	0	0	0	0	0	0	0	0	0	0	0	0	0	0	0
PIP5K1A	1q21.3	9.4	14.14	14.19	9.27	8.88	6.87	6.84	3.73	1.75	16.62	12.57	12.68	13.66	1.83	9.36	8.84	3.62	9.42	0.05	0.25	0.1	0	0.2	0	0	0	0.19	0	0	0.2	0	0	0	0	0	0
PSMD4	1q21.3	10.9	17.37	16.33	12.25	10.06	7.89	8.17	4.27	1.95	18.13	13.81	13.28	16.83	2.44	12.34	9.52	4.23	11.68	0.02	0	0	0	0	0	0	0	0	0	0.18	0.2	0	0	0	0	0	0
ZNF687	1q21.3	10.91	16.38	16.52	12.58	10.65	8.65	7.98	3.2	0.97	18.13	13.63	13.28	18.29	2.85	12.34	9.75	3.62	12.62	0	0	0	0	0	0	0	0	0	0	0	0	0	0	0	0	0	0
PI4KB	1q21.3	9.9	14.89	15.55	10.93	9.86	7.38	7.03	2.93	0.78	16.01	11.33	12.47	16.1	2.44	12.34	7.26	3.02	12.81	0.02	0	0	0	0	0	0	0	0	0	0	0	0	0	0	0	0.2	0
RFX5	1q21.3	7.97	8.68	12.83	7.62	7.3	6.62	7.98	3.47	0.78	13.9	8.67	9.05	10	1.63	8.94	6.8	1.81	12.05	0.06	0	0	0	0	0.25	0.19	0	0	0	0.35	0	0	0.2	0	0	0	0
POGZ	1q21.3	9.32	14.14	16.23	12.58	8.68	6.62	6.84	3.2	0.39	18.43	10.27	7.85	14.39	2.24	9.79	10.66	0.2	11.3	0	0	0	0	0	0	0	0	0	0	0	0	0	0	0	0	0	0
PSMB4	1q21.3	11.92	15.14	20.41	15.56	10.65	8.4	10.46	4.53	1.17	23.26	13.63	10.66	17.07	3.05	12.55	12.47	1.01	15.44	0	0	0	0	0	0	0	0	0	0	0	0	0	0	0	0	0	0
SELENBP1	1q21.3	12.12	15.88	20.6	14.24	11.05	7.63	9.89	4.53	1.17	25.08	14.16	10.87	17.07	3.05	13.62	11.34	1.41	16.2	0.12	0	0.1	0.33	0.2	0.25	0	0	0.39	0.3	0	0	0.49	0	0.21	0	0	0.38
CGN	1q21.3	14.41	21.84	21.38	18.54	13.02	8.65	11.79	6.13	2.53	26.59	13.63	15.09	21.71	3.86	17.66	13.15	4.23	17.14	0.52	0.99	0.29	0	0.99	0.51	0	0.27	0.39	0.6	0.35	0.6	0.49	0	1.06	0.23	0.2	0.38
TUFT1	1q21.3	14.44	21.84	21.28	18.87	13.21	8.65	11.79	6.13	2.53	26.59	13.81	15.09	21.95	3.86	17.66	13.15	4.23	17.14	0	0	0	0	0	0	0	0	0	0	0	0	0	0	0	0	0	0
SNX27	1q21.3	1.12	1.49	1.46	1.32	0.39	0.51	0.57	0.27	0.19	4.83	0.35	0.6	2.2	0	0.85	1.59	0.2	2.07	0.28	0.25	0.1	0	0.59	0.51	0.19	0	0.19	0	0.35	0.6	0.24	0.41	0.21	1.36	0.2	0.19
CELF3	1q21.3	5.26	6.95	7.48	4.3	2.56	3.05	2.85	1.33	1.36	14.2	6.19	4.23	9.27	0.61	6.6	5.9	1.21	8.85	0	0	0	0	0	0	0	0	0	0	0	0	0	0	0	0	0	0
MRPL9	1q21.3	9.07	14.14	15.26	12.25	6.11	4.07	5.32	5.07	0.78	21.15	11.33	10.26	12.44	4.27	7.02	6.8	1.61	12.43	0.03	0.25	0	0	0	0	0	0	0	0.3	0.18	0	0	0	0	0	0	0
LINGO4	1q21.3	14.39	20.6	23.23	16.23	10.06	8.65	8.56	7.47	2.33	28.7	15.58	18.71	20.73	5.08	17.45	13.61	2.21	18.08	0.15	0.5	0	0	0	0	0	0	0	0.3	0.53	0.2	0.49	0	0.21	0.45	0.2	0
RORC	1q21.3	10.45	14.64	16.91	14.57	7.5	7.38	6.46	4	1.75	19.64	9.56	14.49	15.12	1.42	13.19	12.02	1.01	13.18	0.22	0.25	0.19	0	0	0	0.38	0.27	0.39	0.3	0	0.4	0.24	0.61	0.21	0.23	0	0.38
THEM5	1q21.3	10.45	14.64	16.91	14.57	7.5	7.38	6.46	4	1.75	19.64	9.56	14.49	15.12	1.42	13.19	12.02	1.01	13.18	0.1	0	0	0.33	0.2	0	0.19	0	0	0.3	0	0.4	0	0	0	0.23	0	0.19
THEM4	1q21.3	1.89	0.99	3.79	2.65	1.38	0.76	1.33	0.53	0.19	3.32	2.65	1.61	3.66	0.81	1.91	1.36	0	3.01	0.03	0	0.1	0	0	0	0	0	0	0	0	0.2	0	0	0	0	0	0
S100A10	1q21.3	0.29	0.5	0.29	0.33	1.18	0	0	0	0	0.91	0	0.2	0.24	0	0.43	0.45	0	0.38	0	0	0	0	0	0	0	0	0	0	0	0	0	0	0	0	0	0
S100A11	1q21.3	3.3	4.96	5.83	1.66	2.56	2.04	3.99	2.4	0.58	2.72	4.96	4.23	4.88	1.22	4.26	2.95	1.01	4.14	0	0	0	0	0	0	0	0	0	0	0	0	0	0	0	0	0	0
TCHHL1	1q21.3	1.28	2.23	2.33	1.66	1.38	1.27	0.76	0	0	3.02	1.42	1.41	0.98	0.2	1.91	1.13	0	1.69	0.06	0	0.19	0	0.2	0	0	0	0	0	0	0	0	0	0.21	0.23	0	0
HRNR	1q21.3	14.5	19.11	25.07	17.22	12.82	10.94	8.94	5.07	1.56	28.4	15.4	15.09	22.44	3.25	15.96	12.02	3.22	17.7	0.5	0.5	0.39	0	0.39	0.25	0.38	0.27	0.78	0.6	0.18	0.2	0.24	1.02	0.21	0.91	0.4	1.13
FLG	1q21.3	20.3	25.56	34.4	26.49	18.15	14.5	13.88	10.4	3.11	44.11	25.31	20.12	29.02	4.47	22.34	19.95	3.62	22.41	1.12	1.49	1.26	1.32	0.2	1.02	1.33	1.33	1.36	1.51	0.71	1.21	0.98	1.42	1.06	1.36	1.01	1.51
FLG2	1q21.3	19.72	24.81	33.72	25.17	17.95	14.5	13.12	10.4	2.72	42.3	24.25	19.52	27.32	4.27	22.34	19.27	3.62	21.85	0.37	0.5	0.39	0.33	0.59	0.25	0.57	0	0.39	0.3	0.18	0.6	0.73	0	0.21	0.45	0.4	0.19
CRNN	1q21.3	4.67	5.71	7.87	4.97	3.55	4.07	3.04	1.6	0.19	9.97	4.78	4.02	7.32	1.63	5.53	4.76	0.8	6.4	0.05	0	0.1	0	0.2	0	0.19	0	0	0	0	0	0	0	0.21	0	0.2	0
LCE5A	1q21.3	3.35	2.98	6.12	3.64	3.94	2.54	2.09	1.6	0	6.04	2.83	3.42	4.63	0.61	4.68	3.17	0	3.95	0	0	0	0	0	0	0	0	0	0	0	0	0	0	0	0	0	0
LCE3D	1q21.3	6.1	8.93	8.94	7.28	5.33	2.29	3.42	2.13	0.97	11.18	6.55	8.45	8.78	1.22	7.02	7.71	0.8	8.85	0.01	0	0	0	0	0	0	0	0	0	0	0.2	0	0	0	0	0	0
LCE3E	1q21.3	6.1	8.93	8.94	7.28	5.33	2.29	3.42	2.13	0.97	11.18	6.55	8.45	8.78	1.22	7.02	7.71	0.8	8.85	0.11	0	0	0.66	0	0	0	0	0.58	0	0.18	0	0.24	0.2	0	0.23	0	0
LCE3A	1q21.3	0.36	0.25	0.97	0.33	0.2	0.51	0.38	0.27	0	0.3	0.18	0.6	0.73	0	0	0.23	0	0.56	0.01	0	0	0	0	0	0	0	0	0	0	0	0	0	0	0	0	0.19
LCE2D	1q21.3	0.9	0.74	2.24	1.32	0.2	1.02	0.38	0.27	0	1.21	0.35	1.21	1.71	0.2	0.85	0.23	0	0.75	0.01	0	0	0	0	0	0	0	0	0	0.18	0	0	0	0	0	0	0
LCE2B	1q21.3	0.65	0.5	1.65	0.99	0.2	0.51	0.19	0.27	0	0.91	0.18	0.6	0.98	0.2	0.85	0	0	0.38	0.01	0	0	0	0	0	0	0	0	0	0	0	0	0	0	0.23	0	0
LCE2C	1q21.3	1.14	0.99	2.53	1.66	0.2	1.27	0.57	0.8	0	1.81	0.53	1.41	1.95	0.2	0.85	0	0	1.32	0.03	0	0	0	0	0	0.19	0.27	0	0	0	0	0	0	0	0	0	0
LCE2A	1q21.3	0.88	0.74	1.94	1.32	0	1.02	0.19	0.53	0	1.81	0.53	1.21	1.22	0.2	0.85	0	0	0.75	0.03	0	0	0	0	0	0	0.27	0	0	0	0	0	0	0	0.23	0.2	0
LCE4A	1q21.3	1.14	0.99	2.53	1.66	0.2	1.27	0.57	0.8	0	1.81	0.53	1.41	1.95	0.2	0.85	0	0	1.32	0.04	0	0	0	0	0	0.19	0	0	0	0.18	0	0	0	0	0	0	0
KPRP	1q21.3	12.24	18.61	19.92	16.23	12.23	8.91	8.56	3.73	1.75	20.54	13.45	13.08	16.83	3.46	15.32	10.43	2.21	15.25	0.01	0	0	0	0	0	0	0	0	0	0	0	0	0	0	0	0.2	0
LCE1C	1q21.3	12.4	19.11	20.12	16.56	12.23	8.91	8.56	4	1.75	20.54	13.63	13.28	17.07	3.46	15.53	10.66	2.21	15.82	0.04	0	0	0	0	0.25	0.19	0	0	0	0	0	0	0.2	0	0	0.2	0
LCE1E	1q21.3	12.4	19.11	20.12	16.56	12.23	8.91	8.56	4	1.75	20.54	13.63	13.28	17.07	3.46	15.53	10.66	2.21	15.82	0	0	0	0	0	0	0	0	0	0	0	0	0	0	0	0	0	0
LCE1B	1q21.3	7.26	9.18	12.15	10.26	6.51	5.34	5.89	2.67	1.75	9.97	8.14	8.45	10.49	1.42	8.3	7.03	1.41	9.98	0	0	0	0	0	0	0	0	0	0	0	0	0	0	0	0	0	0
LCE1A	1q21.3	7.08	8.68	11.86	9.93	6.51	5.09	5.89	2.4	1.75	9.97	7.96	8.25	10.24	1.42	8.51	6.8	1.41	9.04	0.01	0	0.1	0	0	0	0	0	0	0	0	0	0	0	0	0	0	0
SMCP	1q21.3	2.28	4.71	3.5	2.65	1.78	1.02	1.71	0.8	0.19	5.44	2.12	1.01	2.68	0.81	2.55	1.59	0.6	2.82	0	0	0	0	0	0	0	0	0	0	0	0	0	0	0	0	0	0
IVL	1q21.3	2.28	4.71	3.5	2.65	1.78	1.02	1.71	0.8	0.19	5.44	2.12	1.01	2.68	0.81	2.55	1.59	0.6	2.82	0.05	0	0.1	0.33	0.2	0.51	0	0	0	0	0	0	0	0	0	0	0	0
SPRR4	1q21.3	10.52	13.65	16.42	13.25	8.09	7.12	8.94	5.07	2.72	15.41	13.98	13.88	9.51	4.06	14.04	9.98	2.21	13.18	0.02	0	0	0	0	0	0.19	0	0	0	0	0	0	0	0	0	0	0.19
SPRR1A	1q21.3	10.52	13.65	16.42	13.25	8.09	7.12	8.94	5.07	2.72	15.41	13.98	13.88	9.51	4.06	14.04	9.98	2.21	13.18	0.09	0	0	0	0.2	0	0.19	0	0.39	0.3	0.35	0	0	0	0	0	0.2	0.19
SPRR3	1q21.3	13.3	17.12	20.51	16.23	9.86	8.14	11.41	5.87	3.7	20.54	17.7	17.1	11.22	7.52	18.09	12.93	4.02	15.44	0	0	0	0	0	0	0	0	0	0	0	0	0	0	0	0	0	0
SPRR1B	1q21.3	10.98	14.39	17.1	12.58	8.48	5.6	9.7	3.73	3.31	17.52	14.87	13.88	9.02	6.5	15.53	11.34	3.62	13.75	0	0	0	0	0	0	0	0	0	0	0	0	0	0	0	0	0	0
SPRR2D	1q21.3	10.98	14.39	17.1	12.58	8.48	5.6	9.7	3.73	3.31	17.52	14.87	13.88	9.02	6.5	15.53	11.34	3.62	13.75	0	0	0	0	0	0	0	0	0	0	0	0	0	0	0	0	0	0
SPRR2A	1q21.3	7.3	8.68	12.83	8.61	5.33	2.04	4.75	1.33	1.36	13.6	9.2	10.06	6.59	4.47	9.15	6.8	2.01	9.98	0	0	0	0	0	0	0	0	0	0	0	0	0	0	0	0	0	0
SPRR2B	1q21.3	7.69	9.18	13.61	8.94	5.33	2.54	4.75	1.33	1.36	16.62	9.56	10.46	7.07	4.47	9.15	7.26	2.01	9.98	0	0	0	0	0	0	0	0	0	0	0	0	0	0	0	0	0	0
SPRR2E	1q21.3	0.1	0.25	0	0	0	0	0	0	0	0	0	0.2	0.49	0	0	0.23	0	0.19	0	0	0	0	0	0	0	0	0	0	0	0	0	0	0	0	0	0
SPRR2F	1q21.3	0.51	0.99	1.26	0.66	0.2	0.51	0	0	0	3.63	0.35	0.2	0.24	0	0	0.23	0	0.56	0	0	0	0	0	0	0	0	0	0	0	0	0	0	0	0	0	0
SPRR2G	1q21.3	3.97	4.96	7.19	5.63	2.56	2.8	3.42	2.67	0.39	5.44	4.6	3.82	4.88	0.2	5.32	4.08	0.4	6.4	0.01	0	0	0	0	0	0	0	0	0.3	0	0	0	0	0	0	0	0
LELP1	1q21.3	0.12	0	0.19	0	0	0.25	0.19	0	0	0.3	0	0.2	0.24	0	0.21	0	0	0.19	0	0	0	0	0	0	0	0	0	0	0	0	0	0	0	0	0	0
PGLYRP3	1q21.3	7.72	12.9	11.76	7.28	6.51	4.83	5.7	3.73	1.17	15.11	6.9	10.26	9.76	1.22	12.34	7.71	0.6	8.29	0.02	0	0	0	0.2	0	0	0	0	0	0	0	0	0	0	0	0	0.19
PGLYRP4	1q21.3	8.29	10.67	13.22	8.28	6.71	6.11	6.65	3.47	1.17	15.41	9.03	8.85	10.73	2.03	8.72	8.39	1.61	12.24	0.03	0	0	0	0	0.25	0	0	0	0	0	0	0	0	0.21	0	0	0
S100A12	1q21.3	10.67	15.38	17.98	10.6	8.09	7.63	8.75	3.73	1.36	19.34	11.68	11.67	14.39	2.64	11.28	9.75	2.01	14.12	0	0	0	0	0	0	0	0	0	0	0	0	0	0	0	0	0	0
S100A8	1q21.3	10.1	14.89	16.72	10.26	7.69	7.38	7.98	3.2	1.36	18.13	11.5	10.46	14.15	2.64	10.64	9.3	1.81	13.56	0	0	0	0	0	0	0	0	0	0	0	0	0	0	0	0	0	0
S100A9	1q21.3	10.88	14.64	17.88	9.93	8.68	8.4	8.94	4.53	1.56	19.64	11.33	12.47	15.12	2.44	13.62	10.43	1.61	13.75	0	0	0	0	0	0	0	0	0	0	0	0	0	0	0	0	0	0
S100A7A	1q21.3	8.31	12.66	13.41	8.28	7.1	4.33	6.46	2.67	0.58	15.11	9.2	11.27	11.46	1.63	10.64	6.58	1.01	10.92	0	0	0	0	0	0	0	0	0	0	0	0	0	0	0	0	0	0
S100A7	1q21.3	7.33	11.66	11.95	6.62	5.92	3.05	5.89	1.87	0.19	13.29	8.5	10.46	10	1.22	9.36	6.12	0.6	8.85	0	0	0	0	0	0	0	0	0	0	0	0	0	0	0	0	0	0
S100A3	1q21.3	2.05	2.73	5.15	2.65	1.38	1.53	1.71	1.6	0	2.42	2.65	1.01	2.44	0.2	1.7	1.13	0.6	3.2	0.01	0	0	0	0	0.25	0	0	0	0	0	0	0	0	0	0	0	0
S100A4	1q21.3	2.18	4.47	4.66	0.66	1.58	2.04	1.52	1.6	0	1.81	4.07	1.41	3.17	0.61	1.49	1.59	1.01	3.01	0.05	0	0	0	0	0	0	0.27	0	0	0.18	0	0	0.2	0	0	0.2	0
S100A6	1q21.3	0.12	0.25	0.39	0	0	0.25	0	0.53	0	0.3	0.18	0	0.24	0	0	0	0	0.19	0.01	0	0	0	0	0	0	0	0	0	0.18	0	0	0	0	0	0	0
S100A2	1q21.3	1.75	3.23	4.47	2.32	1.78	1.02	0.95	1.07	0.19	2.42	2.48	0.8	1.95	0.2	0.85	1.13	0.2	2.45	0.1	0.5	0.19	0	0	0	0	0	0.19	0	0	0.6	0	0.2	0	0	0	0
S100A16	1q21.3	8.3	11.66	12.44	10.26	5.72	5.85	5.89	4	2.72	13.9	8.85	8.45	9.27	3.46	10.85	8.39	1.61	9.42	0.05	0	0	0	0	0	0	0	0	0	0	0.4	0	0	0	0.45	0	0
S100A14	1q21.3	9.75	14.39	13.31	10.93	7.3	7.63	7.79	5.07	2.72	14.5	9.2	10.26	12.93	4.67	13.83	10.2	2.41	11.11	0	0	0	0	0	0	0	0	0	0	0	0	0	0	0	0	0	0
S100A13	1q21.3	10.96	15.14	15.45	11.59	8.88	9.41	8.56	5.33	2.72	16.01	11.5	11.87	13.9	5.08	15.53	10.88	2.62	12.99	0.01	0	0.1	0	0	0	0	0	0	0	0	0	0	0	0	0	0	0
S100A1	1q21.3	10.96	15.14	15.45	11.59	8.88	9.41	8.56	5.33	2.72	16.01	11.5	11.87	13.9	5.08	15.53	10.88	2.62	12.99	0.07	0	0.1	0	0	0	0.19	0	0	0	0	0	0	0	0.43	0	0.4	0
SNAPIN	1q21.3	13.12	16.87	19.73	14.24	12.62	11.45	10.27	6.13	3.31	17.82	13.63	14.49	15.37	5.69	17.45	13.38	3.02	16.01	0.02	0	0.1	0	0	0	0	0	0.19	0	0	0	0	0	0	0	0	0
ILF2	1q21.3	10.3	13.15	16.52	10.6	11.24	9.16	8.37	5.07	1.56	12.99	10.62	11.47	12.2	3.25	12.98	10.2	1.61	14.12	0.01	0	0	0	0	0	0	0	0	0	0	0	0	0	0	0	0	0.19
NPR1	1q21.3	10.26	13.15	16.62	10.26	11.05	9.16	8.17	5.07	1.56	13.29	10.8	11.47	12.2	3.25	12.98	9.98	1.61	14.31	0.1	0	0.29	0	0.2	0	0.38	0	0	0	0	0	0.24	0	0	0.23	0	0
INTS3	1q21.3	7.91	7.2	11.86	10.26	6.9	6.62	8.56	3.2	0.58	15.11	8.85	8.25	9.27	1.63	8.09	6.12	2.01	10.55	0.01	0	0	0	0	0	0	0	0	0.3	0	0	0	0	0	0	0	0
SLC27A3	1q21.3	10.06	9.43	15.45	12.25	9.07	8.4	9.51	4.27	0.97	20.85	10.8	10.06	12.68	1.63	9.79	8.16	2.01	14.5	0.27	0	0.19	0.33	0	1.02	0.57	0.27	0	0	0.18	0.4	0.49	0.2	0	0.23	0.6	0.56
GATAD2B	1q21.3	3.19	2.98	6.22	2.98	2.76	2.04	1.52	1.33	0.39	6.95	2.48	2.82	5.12	0.2	2.34	2.04	0	6.59	0.02	0	0	0	0	0	0	0	0	0	0	0	0	0	0.21	0	0	0
CRTC2	1q21.3	11.53	17.62	17.59	12.25	11.44	10.18	7.6	5.87	3.11	18.73	13.45	13.48	14.88	4.27	12.13	10.43	3.22	13.75	0.01	0	0	0	0	0	0	0	0	0	0	0	0	0	0	0.23	0	0
SLC39A1	1q21.3	11.53	17.62	17.59	12.25	11.44	10.18	7.6	5.87	3.11	18.73	13.45	13.48	14.88	4.27	12.13	10.43	3.22	13.75	0	0	0	0	0	0	0	0	0	0	0	0	0	0	0	0	0	0
CREB3L4	1q21.3	11.53	17.62	17.59	12.25	11.44	10.18	7.6	5.87	3.11	18.73	13.45	13.48	14.88	4.27	12.13	10.43	3.22	13.75	0.22	0.25	0.29	0.33	0	0	0	0.27	0.19	0	0.18	0.4	0.24	0.2	0.43	0.45	0.4	0.19
JTB	1q21.3	11.53	17.62	17.59	12.25	11.44	10.18	7.6	5.87	3.11	18.73	13.45	13.48	14.88	4.27	12.13	10.43	3.22	13.75	0.02	0	0.1	0	0	0	0	0.27	0	0	0	0	0	0	0	0	0	0
RAB13	1q21.3	11.53	17.62	17.59	12.25	11.44	10.18	7.6	5.87	3.11	18.73	13.45	13.48	14.88	4.27	12.13	10.43	3.22	13.75	0.02	0	0	0	0.2	0	0	0	0	0	0	0	0	0.2	0	0	0	0
RPS27	1q21.3	11.53	17.62	17.59	12.25	11.44	10.18	7.6	5.87	3.11	18.73	13.45	13.48	14.88	4.27	12.13	10.43	3.22	13.75	0	0	0	0	0	0	0	0	0	0	0	0	0	0	0	0	0	0
TPM3	1q21.3	9.47	13.9	14.77	7.95	6.51	6.11	7.03	4.27	1.17	15.71	10.09	10.26	13.17	1.42	12.98	10.66	1.41	12.99	0.06	0	0	0	0	0	0	0	0.19	0	0.18	0.2	0.24	0.2	0	0	0	0
C1orf189	1q21.3	12.11	16.38	17.69	11.92	9.66	8.14	8.94	5.87	2.14	19.34	12.21	13.88	16.34	2.03	17.45	14.51	2.62	15.82	0.04	0	0.19	0	0	0	0	0	0	0	0.18	0	0	0.2	0	0	0	0
C1orf43	1q21.3	12.31	16.38	18.56	12.25	9.66	8.14	9.32	5.87	2.14	19.94	12.21	14.29	16.59	2.03	17.45	14.74	2.62	15.63	0.01	0	0	0	0	0	0	0	0	0	0.18	0	0	0	0	0	0	0
UBAP2L	1q21.3	11.66	14.14	18.66	14.24	9.86	8.65	9.32	5.33	1.75	17.52	10.44	13.28	14.88	2.03	17.45	12.47	1.81	14.31	0	0	0	0	0	0	0	0	0	0	0	0	0	0	0	0	0	0
HAX1	1q21.3	13.64	15.38	22.16	14.57	13.81	9.67	10.27	6.4	1.56	23.57	13.81	15.9	18.29	2.85	18.09	12.93	2.82	16.2	0.02	0	0.1	0	0	0.25	0	0	0	0	0	0	0	0	0	0	0	0
AQP10	1q21.3	16.58	22.58	24.39	18.54	19.92	13.99	12.93	6.4	1.56	25.98	18.94	19.32	22.93	3.25	22.13	15.42	3.62	16.38	0.06	0	0	0.33	0	0	0	0.27	0	0	0.35	0.2	0	0	0	0	0.2	0
ATP8B2	1q21.3	15.89	21.34	23.13	16.89	19.13	12.72	12.55	6.13	1.36	25.98	18.23	18.51	21.95	3.05	21.49	14.74	3.42	15.82	0.22	0.5	0.39	0	0.39	0	0.19	0.53	0.19	0	0.18	0.4	0	0	0.43	0	0.2	0
IL6R	1q21.3	6.78	9.68	11.86	8.28	5.13	4.58	3.04	4	1.36	11.78	7.43	8.05	8.05	2.64	7.23	5.67	1.81	7.72	0.03	0	0.1	0	0	0	0	0	0	0	0	0.2	0	0	0	0.23	0	0
SHE	1q21.3	6.32	7.94	11.18	6.95	5.52	4.07	4.56	4	1.17	8.76	4.42	8.25	6.59	2.44	4.68	4.76	1.41	9.42	0.01	0	0	0	0	0.25	0	0	0	0	0	0	0	0	0	0	0	0
TDRD10	1q21.3	12.47	18.11	20.31	11.59	11.05	7.89	9.7	6.13	1.17	18.43	13.1	14.08	16.34	4.47	13.62	12.24	1.81	16.95	0.15	0	0.29	0	0	0.25	0	0.27	0	0	0.18	0.6	0	0.2	0	0	0	0
UBE2Q1	1q21.3	15.73	21.59	25.95	12.91	14.6	11.2	11.03	6.93	1.36	26.59	16.28	18.31	20.98	4.47	18.09	16.33	2.41	19.59	0	0	0	0	0	0	0	0	0	0	0	0	0	0	0	0	0	0
CHRNB2	1q21.3	14.79	20.35	24.2	12.25	14	10.18	9.89	6.4	1.36	25.08	15.58	17.1	20	4.06	17.87	15.87	2.21	18.08	0.13	0	0.29	0.66	0	0	0	0	0	0.3	0.53	0	0	0.2	0.21	0	0.2	0
ADAR	1q21.3	10.36	12.9	17.98	8.28	9.07	7.38	6.65	4	0.58	20.24	8.67	12.47	14.39	2.24	10.85	11.56	1.21	13.18	0.09	0	0	0	0.2	0.25	0	0.27	0.19	0	0.35	0	0	0.2	0	0	0	0
KCNN3	1q21.3	5.75	8.44	8.26	5.3	3.16	6.62	5.89	1.6	1.56	11.78	6.02	8.45	7.07	2.24	3.62	5.67	2.01	7.72	0.35	0	0.29	0.33	0.59	1.02	0.57	0.53	0.39	0.6	0.18	0	0	0	0.43	0.23	0.2	0.19
PMVK	1q21.3	7.7	9.93	13.31	6.29	7.1	5.09	5.89	2.4	1.75	16.01	6.37	8.65	8.54	1.83	9.36	8.16	1.61	10.73	0.04	0	0	0	0	0	0.19	0.27	0	0	0	0	0	0	0	0	0.2	0.19
PBXIP1	1q21.3	8.19	9.93	13.99	7.28	7.89	5.85	6.08	2.4	1.75	16.62	7.08	9.46	10.24	2.03	9.36	8.39	2.21	10.92	0.04	0.25	0	0	0.2	0	0	0	0.19	0	0	0	0	0	0	0	0	0.19
PYGO2	1q21.3	8.19	9.93	13.99	7.28	7.89	5.85	6.08	2.4	1.75	16.62	7.08	9.46	10.24	2.03	9.36	8.39	2.21	10.92	0.03	0	0.19	0	0	0	0	0	0	0	0	0	0	0	0	0	0	0
SHC1	1q21.3	11.97	14.64	19.05	10.93	12.23	7.89	8.94	4	2.53	20.85	10.8	13.48	15.85	3.05	16.17	11.56	3.62	15.07	0.05	0	0.1	0	0.2	0	0	0	0	0	0.18	0	0	0	0	0	0	0.19
FLAD1	1q21.3	14.01	19.11	22.45	14.24	13.61	9.67	9.89	5.33	2.14	22.66	13.1	15.9	20.73	3.86	20.43	12.24	4.02	15.82	0.11	0.25	0.1	0	0	0	0	0.27	0.19	0	0	0	0.49	0.41	0	0	0	0
LENEP	1q21.3	14.21	19.11	23.03	14.24	13.81	9.92	10.08	5.33	2.33	22.96	13.1	15.9	20.73	3.86	20.64	12.24	4.02	16.38	0	0	0	0	0	0	0	0	0	0	0	0	0	0	0	0	0	0
ZBTB7B	1q21.3	16.26	21.84	24.98	16.56	16.37	10.18	12.17	7.47	2.72	26.28	18.76	17.91	21.46	4.47	21.91	11.56	4.63	19.59	0	0	0	0	0	0	0	0	0	0	0	0	0	0	0	0	0	0
DCST2	1q21.3	15.48	20.6	24.3	14.57	12.62	8.4	12.55	6.13	1.95	24.47	18.94	17.71	20.49	4.88	22.77	13.15	3.62	19.4	0.22	0.25	0.19	0.33	0.2	0.51	0	0.8	0.39	0	0	0	0	0.2	0.43	0.45	0.2	0.19
DCST1	1q22	16.66	21.34	24.68	15.89	15.98	9.67	12.93	8.8	2.92	28.4	20.89	17.71	21.22	5.08	23.4	15.42	3.42	19.96	0.05	0	0	0	0	0	0.19	0.27	0.19	0.3	0	0	0	0	0	0.23	0	0
ADAM15	1q22	17.45	22.83	26.14	17.22	15.98	10.43	13.88	8.53	2.92	29.31	20.89	18.71	22.93	5.69	24.68	16.1	3.62	20.72	0.08	0	0.29	0	0	0.25	0	0.27	0	0.3	0	0	0	0	0	0	0	0.19
EFNA3	1q22	14.8	21.09	22.06	15.89	12.82	9.67	11.79	6.93	2.33	25.68	18.05	15.69	20.24	4.67	20.85	13.38	2.41	17.51	0.1	0.25	0	0	0	0	0	0.27	0.19	0	0.35	0	0	0	0	0.45	0	0.38
EFNA4	1q22	14.41	20.6	21.87	15.23	12.43	8.65	12.17	6.67	2.33	24.77	16.81	15.9	20.24	4.27	19.79	11.11	2.41	18.27	0.17	0.5	0.1	0.33	0	0	0	0.53	0.19	0	0.18	0	0	0.41	0.43	0.23	0.4	0
EFNA1	1q22	10.05	13.65	15.26	10.93	8.28	7.89	8.17	3.2	1.17	16.62	12.39	13.08	15.37	2.85	12.55	8.39	1.81	11.68	0.08	0.25	0	0	0	0	0	0	0	0.3	0.35	0.2	0	0	0	0	0	0.19
DPM3	1q22	11.94	15.88	18.56	13.25	9.47	8.91	10.08	4	1.56	19.03	15.75	14.49	17.32	3.05	15.53	9.52	2.01	14.12	0.06	0.25	0	0	0	0.25	0.38	0.27	0	0	0	0	0	0.2	0	0	0	0
SLC50A1	1q22	10.11	13.9	15.26	11.26	8.28	7.89	8.17	3.2	1.17	16.62	12.57	13.08	15.37	2.85	12.55	8.62	1.81	11.86	0.03	0	0	0	0	0	0.19	0	0	0	0	0	0	0	0.21	0.23	0	0
KRTCAP2	1q22	15.22	19.6	23.91	16.89	13.21	11.7	13.88	4.8	2.53	23.26	19.11	17.71	23.66	3.66	19.15	13.38	2.62	17.7	0	0	0	0	0	0	0	0	0	0	0	0	0	0	0	0	0	0
TRIM46	1q22	15.22	19.6	23.91	16.89	13.21	11.7	13.88	4.8	2.53	23.26	19.11	17.71	23.66	3.66	19.15	13.38	2.62	17.7	0.03	0	0	0	0	0	0	0	0	0	0	0	0	0.2	0	0	0	0.19
MUC1	1q22	12.9	16.63	21.67	15.56	10.45	12.47	10.65	4.27	2.33	22.05	13.63	14.08	19.02	3.66	15.11	11.79	1.81	16.2	0.05	0	0	0	0	0	0.19	0	0	0	0	0	0	0.2	0	0	0.2	0.38
THBS3	1q22	14.12	18.36	23.03	16.89	11.64	13.99	11.6	4.8	2.33	23.26	15.4	15.49	20.98	3.86	17.87	12.7	2.82	16.76	1.07	0.99	1.17	0.99	1.58	0.51	0.95	0.53	0.58	1.21	1.24	0.8	0.73	1.42	0.64	1.81	1.01	1.69
MTX1	1q22	15.12	19.35	24.39	18.21	12.62	14.5	12.36	5.6	2.53	25.38	15.93	16.5	22.68	4.27	18.94	13.83	3.02	17.7	0.01	0	0	0	0	0.25	0	0	0	0	0	0	0	0	0	0	0	0
GBA	1q22	15.27	19.11	24.2	17.22	12.62	13.49	13.12	5.6	2.53	25.68	16.81	15.9	21.71	4.27	19.36	14.06	3.22	19.4	0.61	0.25	0.49	0.66	0.79	0.25	0.76	0.8	0.39	0.6	1.06	0.6	0.24	0.2	0.64	0.45	1.21	0.56
FAM189B	1q22	14.35	16.87	22.55	17.22	12.23	12.47	13.31	5.07	2.33	24.77	15.58	15.29	20	5.28	16.38	13.15	4.43	17.33	0.03	0	0	0	0	0	0.19	0	0.19	0	0	0	0	0	0	0.23	0	0
SCAMP3	1q22	13.58	16.38	21.38	15.89	10.65	11.7	12.17	4.8	1.95	24.47	14.69	14.89	18.78	5.49	14.89	12.02	4.43	16.95	0	0	0	0	0	0	0	0	0	0	0	0	0	0	0	0	0	0
CLK2	1q22	11.87	13.9	18.08	14.24	9.47	9.92	10.27	4.53	1.36	21.45	12.92	12.88	15.37	4.67	14.26	11.56	4.23	14.69	0	0	0	0	0	0	0	0	0	0	0	0	0	0	0	0	0	0
HCN3	1q22	11.63	13.65	17.88	13.91	10.06	9.67	9.7	5.87	1.56	20.85	12.04	11.87	16.1	4.27	13.4	10.43	3.82	14.5	0.81	1.24	0.87	1.66	0	1.27	0.95	1.07	0.97	0	0.89	0.4	0.73	0.41	0.64	0.68	1.01	0.94
PKLR	1q22	10.66	13.9	15.35	13.25	9.66	7.63	9.13	4.27	0.78	21.15	11.33	11.47	12.93	3.25	13.4	10.43	3.82	13.18	0.73	0.5	0.78	0.66	0.99	1.02	1.14	0.27	0.58	0.3	1.42	0	1.22	0.61	0.21	0.68	0.6	1.32
FDPS	1q22	5.57	6.45	8.65	5.3	4.93	4.33	2.66	4	0.19	10.57	4.6	5.43	7.56	1.42	5.74	5.22	2.01	8.85	0.03	0.25	0	0	0	0.25	0	0	0	0	0	0	0	0	0	0	0	0.19
RUSC1	1q22	7.84	10.42	11.76	8.28	7.5	5.85	5.51	4.27	0.78	14.8	8.32	8.45	10	2.64	7.66	7.48	3.62	10.17	0	0	0	0	0	0	0	0	0	0	0	0	0	0	0	0	0	0
ASH1L	1q22	3.91	3.72	7.19	4.64	3.94	1.53	2.85	1.6	0.58	10.27	3.19	2.62	4.88	1.63	4.04	2.04	1.21	7.16	0.73	1.49	0.58	0.99	0.59	0.76	0.76	2.13	0.39	1.21	0.89	1.01	0.24	0.61	0.21	0.91	1.01	1.13
MSTO1	1q22	3.97	5.71	6.61	3.31	3.35	4.83	3.04	1.07	0.39	6.34	2.65	2.82	5.85	1.83	4.47	3.85	0.4	6.21	0.03	0	0	0.33	0	0	0.19	0	0	0	0	0	0	0	0	0	0.2	0
YY1AP1	1q22	4.96	7.2	7.77	4.97	4.14	4.83	4.37	1.07	0.39	8.16	3.89	3.82	6.83	1.83	6.17	4.31	0.8	7.53	0.06	0	0.19	0	0	0	0	0	0	0	0	0	0.24	0	0.21	0	0.2	0.19
DAP3	1q22	3.28	6.95	5.44	3.64	2.37	2.04	3.42	0.53	0	5.74	3.89	3.42	3.41	0.41	3.4	1.36	0.6	4.71	0.05	0	0.19	0	0	0	0.19	0	0	0	0	0	0	0	0	0	0	0.19
GON4L	1q22	6.58	8.68	11.66	5.63	6.31	4.58	4.18	2.13	0.78	13.6	6.55	6.84	9.51	2.03	6.6	6.35	0.8	10.36	0	0	0	0	0	0	0	0	0	0	0	0	0	0	0	0	0	0
SYT11	1q22	5.83	7.2	10.4	7.28	4.54	3.82	3.42	1.6	0.39	12.39	5.66	5.83	10.49	1.42	6.81	5.9	0.4	8.29	0.03	0.25	0	0	0	0	0	0.53	0	0	0	0	0	0	0	0	0	0
RIT1	1q22	8.49	10.67	14.67	10.93	6.71	5.09	5.32	2.4	0.58	15.41	7.61	8.25	13.9	3.05	10	7.48	1.41	10.73	0.04	0	0	0.33	0	0	0	0	0	0	0	0	0	0	0.21	0	0.2	0
KIAA0907	1q22	8.55	9.68	14.87	10.93	8.09	4.58	5.51	3.2	0.78	13.6	6.73	10.87	12.68	3.25	8.51	7.48	1.61	11.68	0	0	0	0	0	0	0	0	0	0	0	0	0	0	0	0	0	0
RXFP4	1q22	8.53	9.68	14.77	10.93	8.09	4.58	5.51	3.2	0.78	13.6	6.73	10.87	12.68	3.25	8.51	7.48	1.61	11.68	0.08	0	0	0	0.39	0.25	0	0.27	0	0	0	0	0	0	0	0	0	0.19
ARHGEF2	1q22	7.28	8.44	12.73	8.28	6.71	4.07	4.56	2.93	0.58	12.99	4.78	9.26	9.51	2.85	5.96	5.22	1.61	10.36	0.01	0	0	0	0	0	0	0	0	0	0	0	0	0	0	0	0.2	0
SSR2	1q22	3.4	4.47	6.12	2.65	3.75	2.54	2.85	2.4	0.39	6.34	1.95	4.02	3.9	0.81	2.13	3.4	1.01	3.95	0	0	0	0	0	0	0	0	0	0	0	0	0	0	0	0	0	0
UBQLN4	1q22	0.45	0.25	1.07	0.66	0.59	0.51	0.38	0.53	0.19	0.3	0	0.2	0.24	0	0.21	0.68	0.6	0.56	0.01	0	0	0	0	0.25	0	0	0	0	0	0	0	0	0	0	0	0
LMNA	1q22	1.36	0.74	3.11	2.65	1.78	0.25	1.14	1.33	0.39	2.11	0.35	0.8	1.46	0.2	0.85	0.68	0	2.26	0.22	0	0.1	0	0.79	0.25	0	0.8	0.19	0.6	0.53	0.2	0.24	0	0	0.45	0	0.38
SEMA4A	1q22	10.57	12.16	17.98	10.6	6.9	6.36	8.75	6.13	1.95	19.94	11.68	11.87	15.85	1.63	10.85	8.16	1.61	12.81	0.09	0	0	0	0.2	0	0	0.27	0.78	0.3	0	0	0	0	0	0	0	0
SLC25A44	1q22	11.57	13.65	18.46	11.59	7.5	7.63	8.75	6.13	1.56	21.75	13.27	13.68	16.83	2.03	12.98	10.43	1.61	14.12	0.22	0.25	0.39	0	0.2	0.51	0.19	0.53	0.58	0	0.35	0.2	0	0.2	0.21	0.23	0.2	0
PMF1	1q22	11.98	14.89	18.37	12.25	9.47	8.14	7.6	5.33	1.56	22.66	14.51	12.47	17.32	3.05	13.62	12.47	2.01	14.5	0	0	0	0	0	0	0	0	0	0	0	0	0	0	0	0	0	0
BGLAP	1q22	13.66	17.12	20.7	14.24	12.82	9.41	8.75	7.2	2.33	27.49	16.28	14.29	18.05	3.46	14.89	14.74	3.22	16.01	0.07	0	0	0	0	0.25	0	0.8	0	0.3	0	0	0	0.2	0	0	0	0
PAQR6	1q22	16.23	20.35	24.39	18.21	14.79	10.94	11.03	8.27	3.31	30.82	20	16.1	21.71	4.88	18.72	17.91	3.42	19.4	0	0	0	0	0	0	0	0	0	0	0	0	0	0	0	0	0	0
SMG5	1q22	15.12	19.85	22.64	17.55	14.79	10.69	9.7	8	3.11	28.4	17.35	14.49	19.76	4.88	18.09	16.78	2.82	18.83	0.01	0	0	0	0	0	0	0	0	0	0	0.2	0	0	0	0	0	0
C1orf85	1q22	16.03	20.6	23.42	18.21	15.19	10.43	11.98	8.27	3.31	28.7	18.76	15.9	22.93	4.67	19.36	18.59	3.02	19.77	0.04	0.25	0	0	0	0	0.19	0	0	0	0.18	0	0.24	0	0	0	0	0
TMEM79	1q22	16.92	22.08	25.27	19.21	16.37	11.7	11.98	8.53	3.31	30.51	19.82	16.3	24.15	5.08	20.85	19.05	3.02	20.72	0.03	0	0.1	0.33	0	0	0	0	0	0	0	0	0	0	0.21	0	0	0
CCT3	1q22	12.7	16.87	18.95	14.24	11.44	7.89	10.46	6.13	2.72	22.36	14.69	11.27	17.8	3.86	15.74	14.74	2.01	16.2	0.16	0	0.19	0.33	0	0	0.38	0.27	0.19	0.6	0.53	0	0	0	0.21	0.23	0	0.19
C1orf61	1q22	0.12	0	0.39	0.33	0.2	0	0	0	0	0.3	0	0.2	0.24	0	0.43	0	0	0.19	0.01	0	0	0	0	0	0	0	0	0	0	0	0	0	0.21	0	0	0
MEF2D	1q22	11.83	13.15	19.44	13.91	11.44	7.89	8.56	4.8	1.75	23.26	13.45	11.47	16.59	1.83	15.32	11.56	1.61	14.69	0.04	0	0.1	0	0	0	0	0	0	0	0	0	0	0.2	0	0	0	0
IQGAP3	1q22	16	18.86	23.32	18.54	14.99	12.47	12.36	8	5.25	25.68	18.41	18.31	21.46	4.27	20	17.46	4.83	19.77	0.45	1.24	0.49	0.33	0.59	0	0.38	0.53	0.19	0.3	0.53	0.4	0.73	0.2	0.21	0.23	1.01	0.56
APOA1BP	1q23.1	14.63	17.37	21.28	14.57	12.23	10.43	11.41	7.2	5.84	25.38	17.17	17.1	20.49	4.06	17.02	16.55	5.03	18.08	0.05	0	0.1	0	0	0	0	0	0	0.3	0	0.2	0	0	0	0	0.4	0
GPATCH4	1q23.1	6.13	7.44	9.82	4.97	4.34	3.31	3.99	2.67	2.92	12.99	7.79	6.64	8.54	1.63	5.32	5.9	2.41	9.23	0.05	0	0	0	0	0	0	0.53	0	0	0	0	0	0	0	0	0.2	0
BCAN	1q23.1	11.91	15.38	19.92	12.58	9.27	6.11	8.17	5.87	1.56	19.34	13.81	15.09	16.59	4.06	15.32	10.43	2.41	14.88	0.12	0.25	0.1	0	0.2	0	0	0.53	0	0.3	0.18	0	0	0	0.43	0	0	0
NES	1q23.1	11.56	14.89	19.44	12.58	8.68	5.85	7.79	5.33	1.56	19.03	12.92	15.29	16.1	3.86	14.89	10.88	2.21	14.31	0.27	0.5	0.29	0.33	0.2	0.25	0.19	0.53	0.39	0.3	0.71	0.2	0	0.41	0.21	0	0.2	0.19
CRABP2	1q23.1	15.64	19.35	26.92	19.21	14.6	8.91	10.46	6.67	2.33	28.4	16.99	17.71	21.22	4.47	18.51	15.19	3.02	18.27	0	0	0	0	0	0	0	0	0	0	0	0	0	0	0	0	0	0
ISG20L2	1q23.1	8.68	11.41	16.23	10.26	9.07	6.11	5.13	3.2	0.78	17.52	8.67	7.24	11.22	2.85	7.23	9.75	1.21	9.79	0	0	0	0	0	0	0	0	0	0	0	0	0	0	0	0	0	0
MRPL24	1q23.1	10.66	13.15	19.24	10.6	10.85	7.63	7.22	3.73	1.17	20.54	10.62	10.66	13.66	4.67	10.43	11.34	1.61	11.49	0.04	0	0.19	0	0	0	0	0	0.19	0	0.18	0	0	0	0	0	0	0
HDGF	1q23.1	11.74	14.64	19.92	11.59	11.05	8.14	9.13	4.8	1.56	21.75	12.21	12.07	15.85	4.88	12.77	12.02	2.01	13.18	0	0	0	0	0	0	0	0	0	0	0	0	0	0	0	0	0	0
PRCC	1q23.1	11.78	15.38	19.44	10.6	10.45	8.4	10.08	4	2.14	19.94	13.27	11.47	16.1	5.49	13.19	14.06	3.02	14.31	0.01	0	0	0	0	0	0	0	0	0	0.18	0	0	0	0	0	0	0
SH2D2A	1q23.1	10.25	13.9	15.74	9.93	8.68	5.85	11.03	3.47	1.36	18.43	12.21	10.26	12.93	4.06	12.55	12.02	2.82	12.24	0.04	0	0.1	0	0	0.25	0	0	0	0	0	0	0.24	0	0	0	0	0
NTRK1	1q23.1	11.68	14.64	17.88	9.6	10.06	7.89	10.08	3.73	2.14	22.05	13.1	12.27	15.12	4.67	12.77	13.61	4.02	13.56	0.45	0.74	0.29	0.33	0.2	1.02	1.14	0.27	0.78	0	0.53	0.4	0.73	0.2	0.21	0.45	0	0.38
INSRR	1q23.1	11.68	14.64	17.88	9.6	10.06	7.89	10.08	3.73	2.14	22.05	13.1	12.27	15.12	4.67	12.77	13.61	4.02	13.56	0.82	0.25	0.78	0.99	1.38	0.51	1.71	0.8	0.78	0	0.71	0.4	1.22	0.41	1.06	0.45	0.2	0.94
PEAR1	1q23.1	20.43	27.05	33.62	22.52	18.34	12.98	12.74	9.6	4.09	35.35	23.01	21.13	27.07	8.54	24.68	20.63	5.23	22.98	0.44	0.74	0.39	0	0.39	0.25	0.38	0.53	0.19	0.3	0.35	0.8	0.49	0.61	0.21	0.23	0	1.13
ARHGEF11	1q23.1	11.64	14.89	21.09	13.25	8.88	7.12	7.79	4.8	2.33	19.64	13.27	14.29	17.8	2.64	12.98	11.34	1.61	12.81	0.14	0	0.19	0	0.2	0	0.19	0	0	0.3	0	0	0.49	0	0.21	0.23	0.2	0.19
ETV3	1q23.1	0.1	0.25	0.39	0	0	0	0	0	0	0.3	0.18	0	0	0	0.21	0.23	0	0	0	0	0	0	0	0	0	0	0	0	0	0	0	0	0	0	0	0
FCRL5	1q23.1	13.03	15.14	20.02	11.92	13.61	8.65	8.75	6.4	2.33	22.96	13.81	13.28	19.76	4.88	17.45	12.24	3.02	16.38	0.07	0.5	0.1	0	0.39	0	0	0	0	0	0	0	0	0	0	0	0	0
FCRL4	1q23.1	12.62	14.89	21.19	12.25	8.68	9.67	11.22	6.13	2.92	19.64	12.21	13.48	15.85	6.3	17.87	12.24	4.43	14.12	0.12	0	0.19	0.33	0	0	0	0	0	0	0	0.2	0	0.2	0	0.45	0.2	0.38
FCRL3	1q23.1	8.92	13.65	14.09	7.28	8.28	5.34	8.75	3.2	1.36	16.31	9.38	9.86	14.39	4.06	11.49	8.62	0.8	9.98	0.14	0	0.29	0.99	0.2	0.51	0	0	0.19	0.3	0.18	0	0	0	0.21	0	0.2	0
FCRL2	1q23.1	13.57	20.1	23.52	11.92	11.44	10.94	10.27	7.2	1.75	22.36	12.74	13.68	17.8	4.27	18.09	13.38	2.41	14.88	0.04	0	0.1	0	0	0	0	0	0	0	0	0	0	0	0	0	0	0.19
FCRL1	1q23.1	10.76	14.64	18.66	9.27	9.07	8.4	8.17	6.67	1.17	16.92	9.91	11.47	15.37	3.46	14.26	9.98	1.81	12.43	0.02	0	0	0	0	0	0.19	0	0	0	0	0	0.24	0	0	0	0	0
CD5L	1q23.1	3.99	5.21	7.39	3.97	3.16	3.31	2.28	1.87	0	7.85	3.36	3.02	5.85	0.41	4.04	3.4	0.2	5.65	0.03	0	0.1	0	0	0	0	0	0.19	0	0	0	0	0	0	0	0	0.19
KIRREL	1q23.1	8.47	10.42	13.22	9.27	7.5	5.6	7.98	3.2	1.95	17.22	9.03	8.85	13.9	2.64	10	5.67	1.61	11.49	0.01	0	0	0	0	0	0	0	0	0	0	0	0	0	0	0	0	0
CD1D	1q23.1	2.05	1.74	3.69	3.64	2.17	1.02	0.76	0.8	0.19	7.25	0	1.41	2.44	0.81	4.04	2.04	0.2	2.82	0.01	0	0.1	0	0	0	0	0	0	0	0	0	0	0	0	0	0	0
CD1A	1q23.1	5.05	7.69	7.87	5.3	3.94	1.53	5.51	3.2	0.39	10.57	5.13	6.84	5.85	1.02	7.02	4.99	0.6	5.65	0.11	0	0.19	0	0	0	0.38	0	0	0.3	0.18	0	0.24	0	0.21	0.23	0.2	0.19
CD1C	1q23.1	1.87	1.24	3.89	2.65	1.58	0	1.14	0.8	0.39	2.11	2.48	1.61	2.44	0.61	1.7	1.59	0	3.39	0.04	0	0	0	0.2	0	0.19	0	0	0.3	0	0	0	0	0	0	0.2	0
CD1B	1q23.1	1.59	1.99	4.18	1.66	1.18	1.53	0.76	0.8	0	2.11	0.71	1.61	1.95	0.61	1.7	1.36	0	2.45	0.02	0.25	0	0	0	0	0	0	0	0	0	0	0	0	0	0	0	0.19
OR10T2	1q23.1	12.28	16.13	19.44	14.57	9.27	9.16	9.89	5.6	2.33	18.73	12.21	13.08	17.56	3.05	15.96	11.79	2.82	16.38	0.05	0	0.1	0	0	0.25	0	0	0.19	0	0.18	0	0	0	0	0	0	0.19
OR10K2	1q23.1	14.28	19.11	21.48	15.23	10.65	10.94	12.17	6.13	2.72	25.68	15.58	15.9	20	3.66	18.72	14.06	3.42	17.89	0.05	0	0.19	0	0	0	0	0	0	0	0	0.2	0	0	0	0.23	0.2	0
OR10K1	1q23.1	12.12	17.62	19.34	14.57	7.3	9.16	10.08	3.47	1.56	22.05	13.81	13.28	17.07	3.46	17.45	12.02	2.01	16.01	0.04	0.25	0	0	0	0	0	0	0.19	0	0	0	0	0.2	0	0	0	0
OR10R2	1q23.1	9.75	14.89	16.42	9.27	6.11	6.87	8.17	2.67	0.97	19.94	10.97	10.26	12.68	2.85	14.26	10.88	1.21	12.24	0.01	0	0	0	0	0	0	0	0	0	0	0	0	0.2	0	0	0	0
OR10X1	1q23.1	13.33	17.87	22.93	16.23	9.27	8.65	10.46	5.07	3.31	24.47	15.93	14.29	15.61	5.69	18.72	13.38	2.62	16.38	0.08	0	0.1	0	0.2	0	0.19	0	0	0	0	0.2	0.24	0	0.21	0	0	0
OR6Y1	1q23.1	11.54	16.13	19.63	13.91	7.69	7.63	9.7	4	3.11	20.85	14.34	12.47	13.17	5.28	16.17	12.02	2.41	14.69	0.05	0	0	0	0	0	0	0.27	0	0	0.18	0	0	0	0	0	0.4	0
OR10Z1	1q23.1	11.55	15.38	19.24	13.58	7.89	7.38	9.13	4.27	2.72	21.15	12.21	13.08	13.9	4.88	16.6	12.02	2.41	14.69	0.04	0	0	0.33	0	0.51	0	0	0	0	0	0	0	0	0	0.23	0	0
OR6K2	1q23.1	1.27	1.99	2.72	2.32	0.79	0.76	0.76	0.53	0	4.23	1.06	0.8	1.95	0.61	0.21	2.04	0.2	1.88	0.12	0	0.39	0	0	0	0.19	0.27	0.19	0	0	0	0	0	0	0	0	0.38
OR6K6	1q23.1	10.07	13.9	17.2	12.25	8.88	6.11	7.41	3.2	0.97	18.13	10.27	9.46	11.46	2.64	10.85	9.52	1.61	13.56	0.06	0	0.19	0	0.2	0.25	0.19	0	0	0	0	0.2	0	0	0	0	0	0
OR6N1	1q23.1	8.68	11.41	15.55	10.6	8.48	5.09	6.27	2.93	0.97	15.11	9.03	8.05	10	2.03	9.57	7.48	0.6	11.49	0.02	0	0	0.33	0	0	0	0	0	0	0.18	0	0	0	0	0	0	0
OR6N2	1q23.1	5.09	7.2	9.23	4.3	2.96	3.05	4.94	1.87	0.58	11.48	5.84	5.43	4.88	2.03	4.04	4.54	1.41	7.91	0.01	0	0	0	0	0	0	0	0	0	0	0	0	0	0	0.23	0	0
MNDA	1q23.1	7.02	8.44	11.95	9.6	5.13	2.8	6.65	1.87	0.97	16.62	7.43	5.63	10.49	2.24	8.09	7.48	1.61	8.29	0.11	0.25	0.19	0	0	0	0.19	0.27	0	0	0	0	0	0	0	0	0	0.19
PYHIN1	1q23.1	3.18	2.73	6.51	2.32	3.75	1.78	1.33	2.4	0	7.85	1.77	1.61	5.85	0.81	1.06	1.13	0.2	3.95	0.1	0	0.19	0	0	0	0.19	0	0	0	0	0.2	0.49	0.41	0	0	0	0
IFI16	1q23.1	10.84	16.63	16.62	13.58	10.26	6.36	7.22	5.07	2.14	21.15	10.27	10.46	14.39	2.64	14.68	14.06	2.62	11.49	0.03	0	0.1	0	0	0	0	0	0	0	0.18	0	0	0	0.21	0	0	0
AIM2	1q23.1	8.56	12.41	13.12	10.6	8.48	5.6	5.89	4.8	1.95	18.43	7.26	8.45	10.49	2.24	9.57	11.11	2.21	9.79	0.1	0.25	0	0	0	0	0.38	0.27	0.19	0	0.53	0	0	0	0	0	0	0
CADM3	1q23.2	3.96	4.71	8.55	2.98	2.17	1.27	2.66	0.53	0.19	5.14	4.78	4.02	8.54	1.42	5.74	2.04	0.8	4.71	0.07	0.25	0	0	0	0	0.19	0	0	0	0	0	0	0	0	0	0.4	0.19
FCER1A	1q23.2	2.89	4.47	4.18	2.98	2.37	2.8	2.47	0.53	0	8.76	3.01	3.02	4.88	0.2	2.77	4.08	0	3.95	0.01	0	0	0	0	0	0	0	0	0	0	0	0	0	0	0	0	0
OR10J3	1q23.2	2.89	4.47	4.18	2.98	2.37	2.8	2.47	0.53	0	8.76	3.01	3.02	4.88	0.2	2.77	4.08	0	3.95	0.06	0	0	0	0.2	0	0.19	0	0	0	0	0	0.49	0	0	0	0.2	0
OR10J1	1q23.2	7.39	13.65	10.88	7.95	5.13	4.33	4.75	2.13	0.58	18.13	7.43	6.84	10	2.44	11.7	6.12	0.6	8.66	0.01	0	0	0	0	0	0	0	0	0	0	0.2	0	0	0	0	0	0
OR10J5	1q23.2	5.67	9.43	9.43	3.64	5.13	2.8	4.94	1.33	0.58	11.18	6.02	6.44	9.27	1.22	7.66	6.58	0.8	5.65	0.05	0	0.1	0	0	0	0	0	0	0	0.35	0	0	0	0	0.23	0	0
APCS	1q23.2	2.96	4.22	3.98	1.99	1.78	1.53	2.47	1.07	0.39	4.23	3.89	3.22	3.66	1.63	5.32	2.27	0.4	3.58	0.05	0.25	0.1	0	0	0	0	0	0	0	0.18	0	0	0.2	0	0	0.2	0
CRP	1q23.2	3.74	3.47	6.41	4.64	1.78	1.78	2.66	1.33	0.19	6.04	4.78	4.23	5.85	1.22	4.47	4.31	0.8	3.77	0.06	0.5	0	0	0	0	0.19	0	0	0	0	0	0	0	0.21	0	0	0
DUSP23	1q23.2	11.55	17.37	18.08	13.25	9.27	7.63	8.56	5.6	0.58	19.34	11.86	12.27	14.15	4.47	16.6	10.43	1.41	14.69	0.19	0	0.1	0	0	0	0	0.53	0	0.91	0	0	0.24	0.2	0.21	0.68	0	0.38
FCRL6	1q23.2	13.72	23.08	21.48	15.56	10.65	9.16	9.7	6.13	0.97	26.89	13.27	14.69	17.07	4.88	18.09	12.24	2.21	17.7	0.19	0.25	0.1	0.33	0.2	0.25	0	0	0.19	0.3	0.18	0	0.24	0	0.21	0.23	0.2	0.38
SLAMF8	1q23.2	15.33	23.82	23.32	16.23	11.24	10.94	10.27	6.93	1.95	29	15.4	16.7	20.49	5.69	20.43	15.19	3.42	19.77	0.17	0	0.1	0	0.2	0.25	0	0	0	0	0.35	0	0.24	0	0.64	0.45	0.2	0
VSIG8	1q23.2	14.5	22.33	22.25	15.56	10.45	10.43	9.51	6.93	1.95	28.4	14.69	15.69	19.76	5.49	18.72	13.83	3.22	18.27	0.01	0	0	0	0	0	0	0.27	0	0	0	0	0	0	0	0	0	0
TAGLN2	1q23.2	7.61	10.92	13.12	12.25	6.11	2.54	5.51	3.2	0.97	13.6	8.5	8.05	11.71	1.63	8.94	7.48	0.8	8.85	0.03	0	0	0.33	0	0	0	0	0	0	0	0	0	0.2	0	0	0	0
IGSF9	1q23.2	7.61	10.92	13.12	12.25	6.11	2.54	5.51	3.2	0.97	13.6	8.5	8.05	11.71	1.63	8.94	7.48	0.8	8.85	0.06	0	0.19	0	0.2	0	0	0	0	0.3	0	0	0.24	0	0	0	0	0
SLAMF9	1q23.2	7.61	10.92	13.12	12.25	6.11	2.54	5.51	3.2	0.97	13.6	8.5	8.05	11.71	1.63	8.94	7.48	0.8	8.85	0.03	0	0.1	0	0	0.25	0	0	0	0	0	0	0	0	0	0	0	0.19
PIGM	1q23.2	3.69	5.46	5.93	4.97	2.17	2.54	3.23	1.6	0.19	5.44	4.42	3.42	4.88	0.81	5.32	3.17	0.4	5.46	0.07	0	0.29	0	0	0	0	0	0	0	0	0	0	0.41	0	0	0.2	0
KCNJ10	1q23.2	6.21	9.68	9.82	7.95	3.55	3.31	5.7	2.4	0.97	9.06	6.73	5.23	7.32	1.22	9.15	5.9	0.6	8.29	0.55	0.25	0.49	0.33	0.59	0.51	0.38	0.53	1.17	0.3	0.53	1.01	0.24	0.81	0.64	0.23	0.8	0.38
KCNJ9	1q23.2	9.13	12.9	15.16	10.26	6.11	3.82	7.03	3.47	1.75	16.62	9.2	10.87	11.22	1.83	12.13	8.39	0.6	11.11	0.01	0	0	0	0.2	0	0	0	0	0	0	0	0	0	0	0	0	0
IGSF8	1q23.2	11.76	18.86	19.44	14.24	9.86	5.6	8.94	4	2.14	19.94	13.81	14.08	14.63	3.46	15.96	10.2	1.21	14.12	0.07	0	0.1	0	0	0.25	0	0	0	0	0.35	0	0	0	0.21	0	0.2	0
ATP1A2	1q23.2	20.5	29.53	32.94	25.5	16.17	11.45	16.54	9.07	3.5	32.33	24.07	21.73	27.32	6.5	26.81	17.91	3.02	25.42	0.38	0.25	0.39	0	0.59	0.25	0.76	0.27	0.19	0	0	0.4	0	0.41	0.43	0.91	0.6	0.94
ATP1A4	1q23.2	22.02	31.76	35.18	28.15	18.15	13.74	16.92	9.87	3.89	36.25	25.13	24.14	29.51	7.52	28.94	19.05	3.02	26.55	1.54	1.49	1.55	0.66	0.79	2.54	1.33	1.07	2.14	0.3	2.12	2.21	0.73	1.22	1.91	2.04	1.61	1.88
PEA15	1q23.2	1.27	1.24	3.11	1.99	0.99	0.51	0.19	0.53	0.19	2.42	1.24	1.21	1.22	0	1.06	1.59	0.2	1.51	0	0	0	0	0	0	0	0	0	0	0	0	0	0	0	0	0	0
DCAF8	1q23.2	5.3	5.96	10.69	3.97	5.33	3.05	4.18	2.13	0.58	12.08	5.49	4.83	7.32	1.83	3.62	5.67	1.21	5.08	0.01	0	0	0	0	0	0	0	0	0	0	0	0	0	0.21	0	0	0
PEX19	1q23.2	10.61	12.9	18.08	9.27	9.47	5.85	9.13	2.93	1.17	21.75	12.21	11.67	15.61	3.05	13.19	9.3	2.41	12.81	0.01	0	0	0	0	0	0	0	0	0	0	0	0	0.2	0	0	0	0
COPA	1q23.2	16.09	20.84	25.36	21.85	13.61	8.4	14.26	4.8	3.5	29	18.94	17.91	22.93	6.91	21.28	14.74	4.02	18.83	0.19	0	0.29	0	0.2	0	0	0	0.39	0	0.18	0.2	0.73	0	0.21	0.45	0.2	0.19
NCSTN	1q23.2	12.11	16.38	19.73	16.56	9.66	5.85	11.03	3.47	2.53	21.75	14.51	14.29	15.85	5.08	17.02	9.75	2.01	15.25	0.13	0	0	0	0.2	0	0.19	0.53	0	0.3	0.35	0.2	0	0.2	0.21	0.45	0	0
NHLH1	1q23.2	11.65	16.38	18.85	16.56	9.27	5.85	10.46	3.47	2.53	20.24	13.81	14.08	15.12	5.08	15.74	9.98	2.01	14.69	0.04	0.25	0.1	0	0	0	0	0	0.19	0	0	0	0	0.2	0	0	0	0
VANGL2	1q23.2	7.64	9.68	12.63	9.6	4.93	3.31	8.17	2.93	1.56	12.08	9.38	7.24	8.29	2.85	13.4	6.8	0.8	9.98	0.27	0	0.1	0.99	0.2	0.25	0.38	1.07	0.58	0.6	0.35	0.8	0	0.41	0	0	0	0
SLAMF6	1q23.2	2.06	1.49	3.89	3.31	2.56	0.25	2.85	1.07	0.19	4.23	2.12	1.81	3.9	0.41	2.34	1.81	0	2.82	0	0	0	0	0	0	0	0	0	0	0	0	0	0	0	0	0	0
CD84	1q23.3	1.39	0.74	3.11	1.66	0.99	0	1.52	0.27	0	1.51	1.77	1.01	2.2	0.61	1.7	1.13	0	2.82	0.12	0	0.29	0	0.2	0	0	0	0	0	0.35	0	0.24	0.2	0.21	0.45	0	0
SLAMF1	1q23.3	6.95	7.2	11.56	7.28	6.11	5.09	4.94	4.27	2.72	11.18	5.13	7.44	10	2.44	8.94	5.44	1.81	9.42	0	0	0	0	0	0	0	0	0	0	0	0	0	0	0	0	0	0
CD48	1q23.3	7.23	8.44	12.54	8.61	5.52	4.83	6.46	2.13	1.56	9.67	5.49	9.26	9.51	2.44	8.94	5.67	1.61	9.04	0.04	0.25	0.1	0	0	0	0	0.27	0	0	0	0	0	0	0	0	0.2	0
SLAMF7	1q23.3	3.05	3.47	5.73	3.31	2.76	0.76	2.66	1.33	0.39	5.14	2.12	3.42	3.66	1.22	4.68	2.04	0.6	4.33	0.01	0	0	0	0	0	0	0	0	0.3	0	0	0	0	0	0	0	0
LY9	1q23.3	14.08	19.6	24	16.23	12.43	9.16	12.17	4.8	1.95	25.98	13.81	13.68	18.78	4.47	18.09	13.83	2.82	17.14	0.09	0.25	0.1	0	0	0	0	0	0.19	0	0	0.2	0	0	0.21	0.23	0.2	0
CD244	1q23.3	18.23	25.06	31.29	24.5	16.17	10.69	15.21	6.4	2.92	32.33	19.11	18.11	24.88	6.3	22.77	16.78	4.43	21.09	0.02	0	0	0	0	0	0	0.27	0	0	0	0	0	0	0	0	0.2	0
ITLN1	1q23.3	11.9	16.87	22.64	15.89	9.66	6.62	11.79	3.73	1.95	21.15	13.98	11.87	15.61	3.86	15.53	9.98	2.82	12.99	0.06	0	0	0.33	0	0	0	0.27	0	0	0	0	0	0.2	0	0	0	0
ITLN2	1q23.3	8.74	13.65	16.52	10.26	6.11	3.82	6.46	3.73	0.78	15.71	9.2	10.46	10.98	2.64	12.13	7.03	0.8	9.23	0.12	0	0.1	0.33	0.2	0	0	0.27	0.19	0.6	0	0.2	0	0	0	0.23	0	0.19
F11R	1q23.3	16.14	25.56	25.07	16.56	14.2	11.45	11.41	6.93	3.5	27.19	20.35	16.5	25.12	4.06	20.21	14.97	3.62	17.51	0.05	0	0.19	0	0	0	0	0	0	0	0	0.2	0	0	0	0	0	0
USF1	1q23.3	17.36	26.8	26.92	17.55	16.37	11.96	12.55	7.73	3.7	28.7	20.71	18.11	26.83	4.47	21.7	15.87	3.62	18.27	0.12	0	0.1	0.66	0	0	0.38	0	0.19	0	0	0.2	0.24	0	0	0.45	0.2	0
ARHGAP30	1q23.3	13.78	21.59	23.13	15.23	13.02	7.63	9.32	5.07	1.95	20.85	14.34	15.49	20	3.46	16.6	12.02	1.61	15.63	0.04	0	0	0	0	0	0	0	0	0	0	0.4	0	0.2	0	0	0.2	0
PVRL4	1q23.3	15.4	21.84	26.72	17.88	14.99	8.65	11.79	5.87	1.95	24.77	14.87	17.1	23.9	4.47	19.15	12.93	1.41	17.14	0.05	0	0.1	0	0	0	0.19	0	0	0	0.18	0	0	0.2	0	0	0.2	0
KLHDC9	1q23.3	10.41	14.14	18.66	11.59	10.45	4.58	7.79	4	0.97	19.34	9.03	11.87	15.85	3.46	12.98	8.16	1.21	11.11	0.22	0.5	0.29	0	0.79	0.76	0.19	0.27	0.39	0	0	0.4	0	0	0	0	0.4	0
PFDN2	1q23.3	8.74	11.66	16.33	10.26	9.07	5.09	7.22	3.47	0.58	14.8	7.43	9.66	13.41	3.46	10.21	5.9	1.01	9.42	0	0	0	0	0	0	0	0	0	0	0	0	0	0	0	0	0	0
NIT1	1q23.3	12.23	16.13	20.7	14.9	12.43	8.14	10.08	4.53	0.78	20.54	11.5	13.88	19.02	3.86	15.96	9.98	1.41	12.62	0.19	0.25	0	0	0.39	0	0.38	0	0.19	0	0.18	0.4	0	0.41	0.21	0.23	0	0.56
DEDD	1q23.3	12.57	17.12	20.7	16.23	12.82	8.65	10.27	4.8	1.17	21.15	12.04	13.88	18.78	4.27	16.17	9.98	2.21	12.62	0	0	0	0	0	0	0	0	0	0	0	0	0	0	0	0	0	0
UFC1	1q23.3	14.31	20.84	23.91	18.87	13.21	9.67	11.03	6.4	1.36	23.87	14.69	14.89	21.46	5.49	16.17	12.24	2.41	16.01	0.03	0	0	0	0	0	0	0	0	0	0.18	0.2	0	0	0	0	0	0
USP21	1q23.3	17.26	24.32	27.21	23.84	15.38	11.7	13.31	6.67	1.56	28.4	18.05	18.91	27.32	5.69	22.55	16.33	3.62	19.21	0.02	0	0	0	0	0	0	0	0	0	0	0	0	0	0	0	0	0
B4GALT3	1q23.3	16.43	25.06	25.75	21.85	15.19	11.45	11.98	6.4	1.56	29	17.35	17.91	24.63	5.49	20.85	15.87	3.22	17.33	0.01	0	0	0	0	0	0	0	0	0	0	0	0	0	0	0	0	0
PPOX	1q23.3	17.17	24.81	27.31	22.85	15.19	11.45	13.69	6.67	1.56	29.61	17.7	18.51	25.85	6.1	21.28	16.78	3.82	19.02	0.25	0.99	0.19	0	0	0	0	0	0.58	1.51	0.18	0.2	0	0.41	0.21	0	0	0.19
ADAMTS4	1q23.3	18.33	28.04	28.47	25.17	16.77	13.74	13.69	7.2	1.75	32.33	19.82	20.52	26.1	6.1	23.19	17.69	3.62	19.96	0.11	0	0	0	0	0	0	0	0.19	0	0	0.2	0.49	0	0	0	0	0.19
NDUFS2	1q23.3	18.31	28.04	28.47	25.17	16.77	13.74	13.69	7.2	1.75	32.33	19.82	20.52	25.85	6.1	23.19	17.69	3.62	19.96	0.16	0.5	0	0	0.2	0	0	0	0.39	0	0	0.2	0	0	0	0.68	0.2	0
FCER1G	1q23.3	16.51	26.3	25.27	23.51	14.79	11.2	12.93	7.2	1.56	30.21	17.88	17.1	20.98	5.89	20.21	14.97	3.62	17.89	0.01	0	0	0	0	0	0	0	0	0	0	0	0	0	0	0	0.2	0
APOA2	1q23.3	16.22	26.05	24.78	22.52	14.79	10.69	12.55	7.2	1.56	29.61	17.7	17.1	20.73	5.89	19.79	14.51	3.22	17.89	0	0	0	0	0	0	0	0	0	0	0	0	0	0	0	0	0	0
NR1I3	1q23.3	15.56	24.57	23.81	21.52	14.6	9.67	12.17	6.93	1.17	28.1	16.99	16.7	19.76	5.49	19.79	13.83	2.41	17.51	0.51	0.5	0.58	0	0.59	0.25	0.38	0.27	0.78	0	0.53	0.4	0	0.61	0.85	0.91	0.2	1.32
TOMM40L	1q23.3	15.56	24.57	23.81	21.52	14.6	9.67	12.17	6.93	1.17	28.1	16.99	16.7	19.76	5.49	19.79	13.83	2.41	17.51	0	0	0	0	0	0	0	0	0	0	0	0	0	0	0	0	0	0
SDHC	1q23.3	2.31	1.49	4.86	1.99	1.38	1.53	1.52	0.8	0.97	4.83	2.12	2.21	1.22	1.02	3.62	3.17	0.8	2.26	0.14	0	0.1	0	0	0	0	0.27	0.39	0.3	0.53	0	0	0.41	0	0.23	0	0
FCGR2A	1q23.3	14.56	19.11	24	15.56	12.43	10.94	10.46	5.87	4.28	23.26	14.69	14.69	19.27	5.49	17.87	12.24	2.62	17.7	0	0	0	0	0	0	0	0	0	0	0	0	0	0	0	0	0	0
FCGR2B	1q23.3	10.9	13.65	18.08	13.58	10.06	8.14	6.84	3.73	1.36	20.54	10.8	11.27	14.39	3.46	13.62	11.56	2.01	11.86	0.01	0	0	0	0	0	0	0	0	0	0.18	0	0	0	0	0	0	0
FCGR3A	1q23.3	14.56	19.11	24	15.56	12.43	10.94	10.46	5.87	4.28	23.26	14.69	14.69	19.27	5.49	17.87	12.24	2.62	17.7	0	0	0	0	0	0	0	0	0	0	0	0	0	0	0	0	0	0
HSPA6	1q23.3	14.56	19.11	24	15.56	12.43	10.94	10.46	5.87	4.28	23.26	14.69	14.69	19.27	5.49	17.87	12.24	2.62	17.7	0.04	0	0	0	0	0	0.19	0	0.19	0	0	0	0	0	0	0	0.2	0
FCRLA	1q23.3	14.56	20.35	24.1	16.56	13.21	9.16	9.51	4.8	1.95	25.08	15.04	15.9	20.49	4.47	20	14.29	2.21	16.76	0.05	0	0.1	0.33	0	0	0	0	0	0	0.18	0	0	0	0.21	0.23	0	0
FCRLB	1q23.3	9.46	13.15	16.42	8.94	6.9	4.07	6.65	3.47	0.78	15.41	9.2	11.27	14.39	3.46	13.4	7.03	1.21	11.86	0.06	0	0.1	0	0	0	0	0	0	0	0	0	0	0	0.21	0	0.2	0.19
DUSP12	1q23.3	17.7	25.81	27.41	22.52	14	11.45	13.69	6.13	3.11	31.42	17.88	19.11	22.68	6.71	26.17	18.82	2.62	20.53	0.05	0.25	0	0	0	0	0	0	0	0	0.18	0	0	0.2	0	0.23	0.2	0
ATF6	1q23.3	11.21	17.87	16.81	16.56	9.66	6.36	8.75	4.8	2.14	24.17	9.56	11.27	15.61	3.05	15.53	12.7	2.21	12.62	0.07	0	0.19	0	0.39	0	0	0.27	0	0	0	0	0	0	0.21	0	0	0
OLFML2B	1q23.3	10.02	14.64	17.49	11.92	8.88	5.09	8.37	5.07	1.17	17.82	8.5	11.67	13.66	2.44	13.62	7.94	0.8	12.81	0.46	0.74	0.49	1.32	0.59	0.76	0.38	1.07	0.19	0.3	0.53	0	0.49	0.41	0.21	0.68	0.2	0.38
NOS1AP	1q23.3	5.43	6.45	9.23	5.3	4.34	4.33	5.32	2.93	0.97	7.85	4.96	4.83	5.61	1.83	7.66	6.35	0.6	7.34	0.03	0	0.1	0	0.2	0	0	0	0	0	0	0	0.24	0	0	0	0	0
C1orf111	1q23.3	14.58	21.59	23.52	15.89	12.62	11.45	11.22	6.4	1.95	24.47	13.27	15.29	20	3.86	19.36	14.51	2.41	17.14	0.04	0	0.1	0	0	0	0	0	0	0.3	0	0	0	0	0	0.23	0.2	0
SH2D1B	1q23.3	13.17	19.6	20.51	13.91	12.43	9.67	9.89	5.33	1.36	22.96	11.86	14.08	19.27	3.25	16.81	13.15	1.81	15.63	0.05	0	0.1	0	0	0	0.19	0	0	0	0	0.2	0	0.2	0	0.23	0	0
UHMK1	1q23.3	0.18	0.5	0.49	0	0	0.25	0.19	0	0.19	0.3	0.35	0	0.24	0	0.21	0	0	0	0.07	0	0.1	0	0	0	0.38	0	0	0	0	0	0	0	0.21	0	0	0.38
UAP1	1q23.3	1.09	1.74	2.53	2.32	1.18	0.51	0.76	0.53	0	2.11	0.89	0.6	0.73	0.2	0.21	1.13	0	2.64	0.01	0	0	0	0	0	0	0	0	0.3	0	0	0	0	0	0	0	0
DDR2	1q23.3	3.81	5.21	6.51	2.98	2.76	2.04	2.85	1.6	0.39	7.25	4.25	3.62	3.9	0.61	3.62	6.12	0.8	6.4	0.32	0.74	0.1	0	0.2	0.76	0.95	0	0.19	0.3	0.35	0.2	0.49	0.41	0.21	0.45	0.2	0.56
HSD17B7	1q23.3	8.2	11.41	14.58	7.62	6.9	4.58	7.22	4.27	1.17	16.31	7.79	7.85	10.49	2.03	9.57	7.94	0.8	10.92	0.12	0.25	0.29	0	0.39	0.25	0.38	0	0	0	0	0	0	0	0	0.23	0.2	0.19
RGS4	1q23.3	0.1	0	0.29	0	0.39	0	0	0	0	0.6	0	0	0	0.2	0	0	0	0.19	0.03	0	0	0	0.2	0	0	0	0.19	0	0	0	0	0	0	0	0	0
RGS5	1q23.3	3.22	4.71	5.83	2.98	2.76	1.78	3.04	1.07	0.39	6.04	2.65	2.82	4.15	0.2	5.74	3.17	1.41	3.58	0.02	0	0	0.33	0	0	0	0.27	0	0	0	0	0	0	0	0	0	0
NUF2	1q23.3	8.87	13.65	15.06	11.26	5.92	5.85	5.7	3.47	1.75	15.11	9.56	11.07	11.46	3.66	11.06	7.03	2.41	11.86	0.11	0.25	0	0	0.2	0.25	0	0.27	0.39	0	0	0.2	0.49	0.2	0	0	0	0
PBX1	1q23.3	0.49	0.25	1.46	0	1.18	0.25	0.57	0	0	0.3	0	0.4	0.49	0.2	0.21	0.45	0	1.88	0.06	0	0	0	0.2	0	0	0	0	0	0.53	0	0.24	0	0	0	0	0
LMX1A	1q23.3	7.49	9.93	12.24	7.62	6.51	5.6	7.22	2.4	0.97	12.39	7.79	6.84	11.95	2.44	7.23	9.3	0.8	9.04	0.17	0	0.29	0	0	0.51	0.19	0.27	0.39	0	0.35	0	0.24	0	0	0	0.6	0.19
RXRG	1q23.3	12.58	16.38	20.99	13.91	10.65	7.89	9.89	5.07	2.92	22.36	15.75	15.09	13.17	3.46	15.11	11.56	2.01	13.56	0.19	0.74	0	0	0	0	0.38	0	0	0.3	0.18	0	0.24	0.2	0.21	0.68	0	0.38
LRRC52	1q24.1	4.63	5.46	8.94	3.97	2.96	1.78	4.18	2.4	1.17	6.95	4.07	5.23	7.32	1.42	5.32	4.54	0.8	3.58	0.17	0	0	0	0.39	0.25	0.38	0	0.58	0.3	0	0.4	0.24	0.2	0.43	0	0	0
MGST3	1q24.1	10.15	15.14	18.66	10.6	8.88	7.38	8.75	5.07	1.36	16.01	10.62	10.06	12.44	3.66	14.47	7.48	1.61	11.86	0.03	0	0.1	0	0	0	0	0	0	0	0	0.2	0	0	0	0	0.2	0
ALDH9A1	1q24.1	10.48	15.14	19.14	10.6	9.27	7.38	8.75	5.07	1.36	16.62	10.97	10.06	13.9	3.66	14.68	8.16	1.61	12.05	0.5	0.5	0.19	0.66	0.39	0	0	1.07	0.78	0.6	0.18	1.01	0.24	0.41	0.85	0.68	0.4	0.19
TMCO1	1q24.1	0.94	0.99	2.43	0.33	0.79	0	0.57	0.27	0	2.11	0.89	0.2	1.46	0	1.28	1.13	0	0.38	0.08	0.25	0.1	0	0.2	0.25	0	0.27	0.19	0	0	0	0.24	0	0	0	0	0
UCK2	1q24.1	3.66	4.47	6.03	3.31	3.16	2.54	3.04	2.93	0.58	5.44	2.83	4.02	7.32	1.02	4.26	3.85	0.4	4.14	0.02	0	0	0	0	0	0	0	0	0	0.18	0	0	0	0	0	0.2	0
FAM78B	1q24.1	2.49	2.73	4.18	3.31	2.37	1.27	2.09	1.07	0	6.95	3.01	2.62	3.41	0.41	2.77	3.17	0	2.26	0.03	0	0	0	0	0	0	0	0	0	0	0	0	0	0	0.23	0.4	0
POGK	1q24.1	7.84	9.68	12.73	7.28	7.3	5.09	5.51	3.2	0.58	17.22	9.38	10.46	11.71	3.05	8.51	7.71	1.81	9.79	0	0	0	0	0	0	0	0	0	0	0	0	0	0	0	0	0	0
TADA1	1q24.1	7.84	9.68	12.73	7.28	7.3	5.09	5.51	3.2	0.58	17.22	9.38	10.46	11.71	3.05	8.51	7.71	1.81	9.79	0.07	0	0	0.33	0	0	0.38	0	0	0	0.18	0	0	0.2	0	0	0.2	0
ILDR2	1q24.1	7.86	8.68	11.86	6.95	7.3	3.56	6.08	4	2.53	12.08	7.08	7.65	9.02	3.66	7.66	7.71	2.82	10.55	0.08	0.25	0.1	0.33	0	0	0	0	0	0	0.18	0	0.24	0.41	0.21	0	0	0
MAEL	1q24.1	6.4	6.95	9.52	4.97	6.71	3.82	4.56	3.2	2.14	11.18	5.84	5.03	7.32	3.25	6.17	5.67	2.01	9.04	0.04	0	0	0.66	0	0	0	0	0	0	0	0	0	0	0.21	0	0	0.19
GPA33	1q24.1	12.4	13.9	21.67	13.58	11.24	7.38	10.84	6.4	1.75	17.52	14.51	12.07	18.29	5.28	11.7	13.38	3.22	14.12	0.02	0	0.1	0	0	0	0	0	0	0	0	0	0	0	0	0	0	0
DUSP27	1q24.1	17.91	20.84	27.79	19.54	17.55	16.54	16.54	9.87	3.5	25.08	21.77	19.92	26.34	6.91	19.79	19.05	5.83	18.46	0.1	0.5	0.1	0	0	0	0	0.27	0.19	0	0.18	0.2	0	0	0.21	0.23	0.2	0
CD247	1q24.2	6.85	8.68	11.37	7.28	7.1	3.05	4.75	1.07	0.58	12.99	7.61	7.44	8.78	1.83	7.87	7.26	1.21	7.34	0.01	0	0	0	0	0	0	0	0	0	0	0	0	0	0	0	0	0
CREG1	1q24.2	0.87	1.24	1.65	0	0.39	1.02	0.76	0.27	0.58	1.51	1.24	0.8	2.2	0	0.43	0.91	0	0.56	0.04	0	0.1	0	0	0.25	0	0.27	0	0	0	0	0.24	0	0	0	0	0
RCSD1	1q24.2	1.71	1.99	3.21	1.32	1.18	1.02	1.9	1.33	0.19	2.42	1.24	2.01	2.68	0.41	1.49	2.04	0.8	2.26	0.1	0.25	0.1	0	0.2	0	0.19	0	0	0	0	0	0	0	0	0	0.4	0.38
MPZL1	1q24.2	2.39	2.23	4.18	3.31	1.97	1.02	1.71	1.07	0.19	4.53	2.12	3.62	4.63	0.2	2.34	3.4	0	3.01	0.11	0.25	0.19	0.33	0.2	0.25	0	0	0	0.3	0	0	0	0	0.21	0	0	0
ADCY10	1q24.2	17.33	24.32	27.7	20.2	16.57	11.2	11.41	5.87	2.33	31.42	19.29	18.31	21.46	5.69	24.26	17.91	3.42	18.27	0.31	0	0.49	0.33	0.39	0.25	0.19	0.27	0	0	0.53	0.6	0.24	0.41	0.21	0.23	0.4	0.19
DCAF6	1q24.2	7.37	10.42	13.02	5.63	6.31	3.56	7.6	4	1.17	12.69	7.26	7.44	11.46	2.44	9.15	7.03	0.4	9.04	0.33	0.25	0.19	0.33	0.2	0.76	0.19	0.27	0.39	0.3	0.53	0.2	0.49	0.41	0.43	0.45	0.6	0
GPR161	1q24.2	4.2	5.71	4.96	5.3	3.35	3.05	3.8	0.8	0.78	7.25	5.66	3.62	6.34	1.42	7.45	3.85	1.61	4.9	0.12	0	0.19	0	0	0	0	0	0.19	0	0.35	0.2	0	0.41	0.43	0	0.2	0.19
TIPRL	1q24.2	5.05	6.2	8.65	6.62	3.55	1.78	4.18	1.6	0.58	10.27	6.37	5.03	6.1	1.83	4.26	4.99	1.21	6.59	0	0	0	0	0	0	0	0	0	0	0	0	0	0	0	0	0	0
SFT2D2	1q24.2	4.03	5.96	5.93	3.31	2.76	3.05	2.47	1.87	0.39	6.95	2.83	4.23	5.37	1.02	7.02	4.08	0.4	6.4	0.02	0	0	0	0	0	0	0	0	0	0.18	0	0	0	0.21	0	0	0
TBX19	1q24.2	1.62	2.23	3.21	1.66	1.38	2.29	1.33	1.87	0.19	2.11	2.12	1.61	1.22	0.81	1.28	1.36	0.2	1.88	0.25	0.5	0.39	0	0	0	0.38	0	0.19	0.3	0.71	0.2	0.49	0.2	0.43	0.23	0.4	0
XCL2	1q24.2	8.6	10.17	14.58	10.6	7.1	6.11	5.7	4	0.97	13.6	8.85	8.45	11.46	2.24	10	8.16	1.61	11.86	0.02	0	0	0	0	0	0	0	0	0.3	0	0	0	0.2	0	0	0	0
XCL1	1q24.2	8.6	10.17	14.58	10.6	7.1	6.11	5.7	4	0.97	13.6	8.85	8.45	11.46	2.24	10	8.16	1.61	11.86	0	0	0	0	0	0	0	0	0	0	0	0	0	0	0	0	0	0
DPT	1q24.2	8.58	9.93	15.74	8.28	7.69	5.34	6.46	4.27	2.14	14.2	6.55	7.65	12.44	3.86	6.38	7.03	1.01	12.43	0.06	0	0	0	0	0	0	0.27	0	0	0	0	0	0	0	0	0	0.38
ATP1B1	1q24.2	4.34	7.2	7	2.98	2.56	3.82	4.75	0.8	0.58	6.65	2.83	5.63	5.61	1.02	7.23	3.85	0.6	6.4	0	0	0	0	0	0	0	0	0	0	0	0	0	0	0	0	0	0
NME7	1q24.2	9.06	11.91	14.48	12.58	6.9	3.82	7.79	3.73	1.75	12.99	9.03	10.66	11.71	2.85	14.04	9.75	2.41	9.6	0.14	0.5	0	0	0.39	0.25	0	0.27	0.39	0.3	0	0	0.24	0	0	0.23	0	0.19
BLZF1	1q24.2	1.67	1.99	2.33	2.32	1.58	1.02	1.14	1.07	0.39	6.65	1.42	2.01	1.71	0.41	1.06	3.4	0.2	2.26	0.14	0.25	0.19	0	0	0	0	0	0.19	0	0	0.4	0.73	0	0	0.23	0.2	0.19
SLC19A2	1q24.2	3.3	3.97	5.54	2.65	2.56	0.25	2.28	1.33	0.97	9.37	1.77	3.22	5.37	0.81	4.04	3.63	0.8	4.33	0.26	0.5	0.39	0	0.39	0	0.38	0	0.39	0	0.53	0.2	0.24	0.2	0	0.23	0.2	0.38
F5	1q24.2	22.98	31.51	35.28	30.46	19.53	12.21	18.06	9.33	5.06	38.97	25.66	23.94	30.24	8.54	30.43	24.49	6.44	26.18	1.57	2.73	2.43	0.99	1.78	1.27	0.95	3.47	1.75	0.6	1.24	1.41	2.44	1.02	0.85	0.68	1.61	1.69
SELP	1q24.2	16.54	21.34	27.02	19.54	13.41	9.92	13.69	7.73	2.72	25.98	19.65	17.51	22.68	6.3	20.64	19.5	2.62	19.4	0.24	0.25	0.29	0.33	0.2	0.25	0.57	0.27	0.19	0	0	0	0	0.2	0.43	0.45	0.4	0.19
C1orf112	1q24.2	10.68	14.89	17.78	16.56	9.86	3.82	7.41	3.73	1.56	20.54	9.73	12.68	12.93	3.46	13.62	9.52	1.81	13.56	0.06	0	0	0	0	0.25	0.19	0	0	0	0	0	0.24	0	0	0.68	0	0
SELE	1q24.2	10.28	14.14	15.74	10.6	8.68	6.87	9.13	4.8	1.36	18.13	11.33	12.07	12.93	2.64	14.47	12.24	2.62	12.24	0.09	0	0.19	0.33	0.39	0	0.19	0	0	0	0	0.2	0	0	0	0	0	0.19
SCYL3	1q24.2	10.28	12.9	16.81	16.23	9.27	4.33	6.84	3.73	1.36	19.64	9.38	12.07	13.17	3.86	13.4	10.43	2.21	12.99	0.02	0	0	0	0	0	0.19	0	0.19	0	0	0	0	0	0	0	0	0
KIFAP3	1q24.2	10.76	13.15	18.95	12.91	10.06	6.62	7.41	5.6	1.95	20.54	9.91	11.67	15.85	4.67	12.98	12.02	2.21	13.37	0.01	0	0	0	0	0	0	0	0	0	0	0	0	0	0	0	0	0
GORAB	1q24.2	7.14	8.19	13.51	9.93	5.13	3.82	6.65	2.93	0.58	10.88	6.19	7.24	8.54	2.03	8.3	6.12	1.01	8.66	0.11	0	0	0	0	0	0.19	0	0.19	0	0.18	0	0	0.61	0	0.23	0.2	0.38
PRRX1	1q24.2	0.33	0.25	0.58	0	0.39	0	0.38	0.27	0	0.3	0.71	0.2	0.24	0	0.21	1.13	0	0.56	0.13	0	0.29	0	0.39	0	0.19	0	0.19	0	0	0.2	0.24	0.2	0	0	0.2	0
FMO3	1q24.3	11.76	14.14	17.69	17.22	10.85	6.11	9.7	3.73	0.78	24.47	12.92	11.67	15.85	4.06	17.87	11.34	1.81	13.18	0.37	0.25	0.39	0.66	0.59	0	0.57	0.27	0.39	0.3	0.35	0.4	0	0.61	0.43	0.23	0.4	0.19
FMO1	1q24.3	6.88	9.18	11.66	8.61	3.94	4.07	6.46	2.93	0.97	10.27	6.73	8.65	9.51	3.25	6.38	7.03	1.81	7.91	0.12	0.25	0.1	0	0	0	0	0.27	0.19	0.3	0.18	0	0	0.2	0	0.23	0.4	0.19
FMO4	1q24.3	7.94	9.68	11.37	9.6	8.68	5.09	5.32	4	0.97	17.82	7.08	8.05	12.44	3.25	10.21	7.48	0.8	8.47	0.36	0	0.39	0	0.2	0.76	0.57	0.27	0.39	0.3	0.53	0.4	0.73	0.2	0.43	0	0.4	0
MYOC	1q24.3	5.64	7.94	10.4	6.29	4.14	3.05	4.75	2.13	0	9.37	5.31	5.43	8.54	1.02	7.02	5.9	0.4	7.16	0.29	0.25	0.49	0	0.2	0	0.38	0	0.39	0.6	0	0.4	0.24	0.61	0.64	0	0	0.38
VAMP4	1q24.3	3.56	2.73	5.15	3.64	3.55	3.31	2.47	1.33	0.19	6.34	1.95	3.82	4.88	1.22	4.04	3.4	0.6	5.84	0	0	0	0	0	0	0	0	0	0	0	0	0	0	0	0	0	0
METTL13	1q24.3	12.34	15.38	17.69	10.93	11.05	11.2	11.41	5.33	4.47	16.92	15.93	12.27	15.12	5.28	17.66	13.61	4.83	14.69	0.11	0	0.1	0	0	0	0	0	0	0	0.18	0	0.24	0.2	0.21	0	0	0.56
PIGC	1q24.3	10.33	13.15	18.37	12.91	10.06	6.62	9.13	4.27	0.97	13.9	9.91	10.66	14.63	2.44	12.77	11.79	1.61	11.3	0.01	0	0	0	0	0	0	0	0	0	0	0	0	0	0.21	0	0	0
C1orf105	1q24.3	10.33	13.15	18.37	12.91	10.06	6.62	9.13	4.27	0.97	13.9	9.91	10.66	14.63	2.44	12.77	11.79	1.61	11.3	0.08	0	0	0	0	0	0	0	0	0.3	0	0.2	0.24	0	0	0.23	0.2	0.19
FASLG	1q24.3	0.44	0.74	0.87	0.66	0.2	0	0.38	0	0	0.3	0.71	0.6	0.24	0.2	0.21	0	0	0.75	0.03	0	0.1	0	0	0	0	0	0	0	0	0	0	0	0	0	0	0.19
TNFSF18	1q25.1	0.19	0.5	0.1	0.66	0.2	0	0	0.27	0	0.6	0.35	0.2	0	0	0.43	0	0	0.38	0.12	0	0	0.33	0	0.25	0	0.27	0	0.6	0.35	0.2	0.24	0.2	0	0.23	0	0
TNFSF4	1q25.1	0.07	0	0.1	0.99	0	0	0	0	0	0	0	0	0	0	0	0.23	0	0.19	0.03	0	0.1	0	0	0	0.19	0	0	0	0	0	0	0	0	0	0	0
PRDX6	1q25.1	4.13	6.2	7.68	4.64	4.54	3.05	3.04	1.87	0.97	9.06	4.6	5.43	5.61	1.42	4.47	2.72	1.01	3.77	0.03	0	0	0	0	0.25	0	0	0.19	0	0	0	0	0	0	0	0	0
ANKRD45	1q25.1	2.55	3.97	5.34	2.98	1.58	1.78	2.47	1.07	0.39	5.44	2.65	1.81	3.17	0.61	1.7	2.27	0.4	3.77	0.01	0	0	0	0	0	0.19	0	0	0	0	0	0	0	0	0	0	0
KLHL20	1q25.1	0.86	0.25	1.65	1.66	0.59	1.02	0.19	0.27	0	0	1.06	0.2	2.2	0.2	0.21	0.45	0.4	2.45	0.07	0	0	0	0.2	0	0.19	0	0.19	0	0	0	0	0.2	0.21	0	0.2	0.19
CENPL	1q25.1	2.78	1.99	6.32	2.98	2.56	1.53	2.28	1.87	0.19	3.63	1.77	2.41	4.39	0.81	2.13	2.27	0.6	5.46	0.01	0	0	0	0	0	0	0	0	0	0	0	0	0	0	0	0	0
DARS2	1q25.1	3.8	2.48	8.07	3.31	3.55	1.78	3.04	2.13	0.19	4.53	3.54	3.42	5.85	0.61	3.62	3.4	0.6	6.97	0.21	0.25	0.39	0	0.2	0.25	0	0.27	0.19	0.3	0	0.4	0.24	0.41	0.21	0.45	0	0.19
ZBTB37	1q25.1	8.19	11.17	15.35	7.62	8.28	5.34	4.94	4.53	0.39	16.62	6.73	7.85	13.66	1.63	9.15	7.03	0.6	11.11	0.01	0	0	0	0	0	0	0	0	0	0	0	0	0	0	0.23	0	0
SERPINC1	1q25.1	8.61	10.92	14.97	8.94	9.07	5.85	5.32	3.47	0.19	17.82	8.14	8.25	14.63	2.24	10	7.26	1.01	10.73	0.07	0.25	0.1	0	0	0	0.19	0.27	0	0	0	0	0	0.2	0	0	0	0.19
RC3H1	1q25.1	7.34	8.19	13.02	9.27	6.31	5.6	5.13	2.4	0.58	13.9	8.14	7.85	8.54	2.44	10.21	6.35	1.41	8.47	0.12	0	0.19	0	0	0	0	0.27	0.19	0	0	0.4	0	0	0.21	0.23	0.4	0
RABGAP1L	1q25.1	5.07	6.95	8.75	6.29	3.94	2.29	4.75	1.07	0.58	9.97	4.96	6.24	6.59	1.02	6.17	4.54	1.01	6.21	0.07	0.25	0	0	0	0	0	0	0	0	0.18	0.2	0	0.2	0	0	0	0.19
GPR52	1q25.1	1.05	1.49	1.85	1.32	0.59	0.76	1.71	0.53	0	1.21	1.42	0.8	1.22	0.2	1.28	0.23	0	1.13	0.03	0	0.1	0	0	0	0	0	0	0	0	0	0	0	0	0	0	0
CACYBP	1q25.1	1.16	0.74	2.43	0.99	1.58	0.25	0.95	0.8	0	1.21	1.42	1.21	2.44	0.61	1.28	0.23	0.4	1.69	0	0	0	0	0	0	0	0	0	0	0	0	0	0	0	0	0	0
MRPS14	1q25.1	1.15	0.74	2.43	0.99	1.58	0.25	0.95	0.53	0	1.21	1.42	1.21	2.44	0.61	1.28	0.23	0.4	1.69	0.04	0	0.1	0	0	0	0	0	0.19	0	0.18	0	0	0	0	0	0.2	0
TNN	1q25.1	21.83	25.56	34.21	26.82	17.16	16.79	18.63	13.33	7.2	34.74	24.42	26.76	26.83	8.74	27.23	21.09	6.04	23.54	0.4	0.5	0.49	0.33	0	0	0.38	0.27	0.39	0.6	0.35	0.2	0	0.41	0.64	0.68	0.6	0.38
TNR	1q25.1	19.25	23.82	29.74	24.83	17.36	15.01	16.35	8.53	3.7	30.51	19.47	20.32	26.59	5.49	29.15	17.46	4.83	21.85	0.05	0	0	0	0.39	0	0	0	0.19	0.3	0	0	0	0	0.21	0	0	0
RFWD2	1q25.1	3.99	5.21	6.41	4.3	3.55	1.27	2.28	2.67	0.58	7.25	3.72	3.42	5.37	2.03	4.26	2.27	0.6	4.14	0.02	0	0.1	0	0	0	0	0	0	0	0	0	0	0	0	0	0	0
ASTN1	1q25.2	12.02	10.92	20.12	12.58	11.05	6.36	9.51	5.6	1.36	22.05	12.04	13.08	19.51	3.66	14.89	13.38	2.41	13.18	0.08	0	0	0	0.2	0	0	0	0	0	0	0.2	0.49	0.41	0.43	0	0	0
RASAL2	1q25.2	3.11	3.23	4.86	3.97	2.96	1.78	3.04	0.53	0.19	6.34	3.19	3.62	4.88	0.61	2.55	3.17	0.6	4.14	0.28	0.74	0.1	0.33	0.39	0.25	0.57	0.27	0	0.3	0.35	0.4	0	0	0	0.23	0.6	0.38
RALGPS2	1q25.2	8.13	8.68	13.8	8.28	8.88	2.29	5.51	4	0.39	14.5	9.2	6.84	9.02	2.24	9.15	7.48	3.02	9.6	0.01	0.25	0	0	0	0	0	0	0	0	0	0	0	0	0	0	0	0
ANGPTL1	1q25.2	0.63	1.24	0.68	0.66	0.99	0	0.57	0	0	1.81	0.89	0.2	0.24	0.2	0.21	1.13	0	1.13	0.26	0	0.29	0	0.39	0.51	0.19	0.27	0.19	0	0	0.2	0	0.41	0.21	0.45	0.4	0.38
FAM20B	1q25.2	8.92	11.66	13.22	9.27	7.3	4.83	7.03	2.67	1.95	16.01	9.38	8.65	13.41	3.05	11.7	8.84	1.41	11.86	0.24	0	0.29	0.33	0	0.25	0.76	0.27	0	0	0.18	0	0.49	0	0.21	0	0.2	0.38
TOR3A	1q25.2	11.44	15.88	17.88	11.59	9.47	6.11	8.17	3.47	1.95	21.15	11.5	11.87	19.27	3.46	14.68	11.11	1.41	13.94	0.18	0	0.19	0.99	0.2	0	0.38	0	0	0	0.35	0.2	0.49	0	0.21	0	0.2	0.19
ABL2	1q25.2	6.36	9.18	10.2	6.29	5.13	1.78	4.75	2.13	0.78	13.29	4.78	6.84	11.95	0.81	7.87	6.12	0.4	8.47	0.19	0.25	0	0	0.39	0	0.19	0	0.39	0.3	0.53	0	0	0.61	0	0.23	0.2	0.19
SOAT1	1q25.2	13.62	17.12	21.57	14.9	9.27	7.12	10.65	5.33	2.33	25.08	12.74	14.49	20.73	3.25	15.74	13.61	2.21	17.89	0.11	0	0.19	0	0	0	0.19	0	0	0	0.18	0.2	0	0.2	0	0	0	0
NPHS2	1q25.2	9.77	13.15	16.23	12.58	7.5	6.87	7.22	2.67	1.17	15.71	9.73	11.27	16.83	2.24	13.4	8.39	1.81	11.3	0.34	0.25	0.29	0.33	0.39	0.76	0.76	0	0.39	0.3	0	0.8	0.24	0	0	0	0.6	0.38
TDRD5	1q25.2	12.91	15.63	20.02	11.26	11.64	6.87	10.08	4.8	2.33	24.17	13.27	15.49	20.98	3.05	16.6	12.47	2.82	15.82	0.03	0	0.1	0	0.2	0	0	0	0	0	0.18	0	0	0	0	0	0	0
FAM163A	1q25.2	0.23	0	0.49	0	0.39	0.25	0	0	0	0.6	0.35	0.2	0.49	0	0	0	0	0.56	0	0	0	0	0	0	0	0	0	0	0	0	0	0	0	0	0	0
TOR1AIP2	1q25.2	2.34	1.74	4.76	2.32	1.97	1.78	1.14	0.8	0.78	2.11	2.12	2.01	2.68	0.61	1.7	2.04	0.2	4.9	0.02	0	0	0	0	0.25	0	0	0.19	0	0	0	0	0	0	0	0	0
TOR1AIP1	1q25.2	8	10.67	12.93	8.28	6.71	5.34	6.65	2.13	1.75	13.29	8.32	9.05	14.39	0.61	10.85	8.16	1.61	9.42	0	0	0	0	0	0	0	0	0	0	0	0	0	0	0	0	0	0
CEP350	1q25.2	11.35	13.4	17.01	9.93	9.86	5.34	7.98	4	4.09	17.22	12.57	13.28	18.05	2.85	15.53	14.06	2.21	12.99	0.2	0	0.19	0	0	0	0.38	0.27	0.39	0.91	0.18	0	0.24	0	0	0.45	0.4	0
QSOX1	1q25.2	7.33	7.94	12.54	6.29	7.3	7.63	4.94	4	1.75	11.78	7.96	6.04	10.73	1.63	9.36	7.71	1.41	9.42	0.01	0	0.1	0	0	0	0	0	0	0	0	0	0	0	0	0	0	0
LHX4	1q25.2	5.03	6.45	9.72	6.95	4.93	2.54	3.23	1.33	0.39	12.08	3.36	4.43	5.61	1.02	7.66	3.17	0.2	6.03	0.45	0.25	0.78	0.33	0.2	0	0.19	0.8	0.58	0.91	0.18	0.2	0.49	0.41	0.85	0	0.6	1.13
ACBD6	1q25.2	0.23	0	0.49	0.33	0.39	0	0.38	0	0	0.3	0.18	0.2	0.24	0.2	0	0.23	0	0.75	0.05	0	0.1	0.33	0	0	0	0	0	0	0	0.2	0.24	0	0	0	0	0
XPR1	1q25.3	1.52	1.24	2.92	1.99	1.58	1.53	1.9	0.53	0	2.42	1.06	2.01	2.93	0.61	1.28	0.91	0.2	2.07	0	0	0	0	0	0	0	0	0	0	0	0	0	0	0	0	0	0
STX6	1q25.3	4.81	6.2	8.07	4.64	2.96	3.31	3.23	2.67	0.78	7.85	3.54	5.83	7.32	2.44	7.23	4.54	1.21	5.08	0.09	0	0	0	0	0.25	0.19	0	0	0	0.18	0	0.49	0	0	0	0	0.56
MR1	1q25.3	7.47	9.43	11.76	8.28	5.92	5.85	6.08	2.93	0.78	13.29	7.96	7.24	11.46	2.64	10.85	7.48	1.21	8.85	0.21	0.25	0.19	0	0.39	0	0	0	0.19	0.6	0	0.6	0	0.2	0	0.45	0.2	0
IER5	1q25.3	7.16	8.68	11.37	7.95	5.72	5.85	5.32	2.93	0.78	12.99	7.61	7.04	11.22	2.64	10	7.26	1.01	8.66	0	0	0	0	0	0	0	0	0	0	0	0	0	0	0	0	0	0
ZNF648	1q25.3	3.01	3.23	4.86	3.97	1.97	1.53	2.47	1.07	0.19	8.76	2.3	3.62	2.93	0.41	3.62	2.95	0	5.08	0.03	0	0	0	0	0	0	0	0	0	0	0	0	0	0	0	0.2	0.19
GLUL	1q25.3	9.3	12.9	14.48	12.91	10.06	6.62	7.03	3.47	0.78	12.99	9.2	7.85	16.34	1.83	15.74	6.8	0.6	10.73	0.19	0	0.19	0.33	0.39	0.76	0	0.27	0.19	0.6	0	0.2	0.24	0.2	0.21	0	0	0.19
TEDDM1	1q25.3	9.3	12.9	14.48	12.91	10.06	6.62	7.03	3.47	0.78	12.99	9.2	7.85	16.34	1.83	15.74	6.8	0.6	10.73	0.04	0	0	0	0	0	0	0	0.19	0	0	0.2	0	0	0.21	0	0	0
RNASEL	1q25.3	11.35	17.37	16.33	10.6	8.88	10.18	8.37	5.33	1.36	19.03	11.5	13.68	16.59	3.86	16.81	9.07	2.01	12.81	0.21	0.5	0.39	0	0.2	0	0	0	0.19	0.3	0	0.2	0.49	0.41	0.21	0	0.2	0.19
RGS16	1q25.3	11.36	17.37	16.33	10.6	8.88	10.18	8.37	5.33	1.36	19.03	11.5	13.68	16.59	3.86	16.81	9.07	2.01	12.81	0.01	0	0	0	0	0	0	0	0	0	0	0	0	0	0	0	0	0.19
RGS8	1q25.3	1.54	1.49	2.72	3.64	0.99	1.02	0.76	0.53	0.19	3.32	0.89	1.01	2.44	0.61	2.34	2.04	0.2	1.51	0	0	0	0	0	0	0	0	0	0	0	0	0	0	0	0	0	0
NPL	1q25.3	8.32	10.17	12.34	11.92	8.88	5.6	6.27	3.2	0.97	15.71	7.79	10.46	13.17	2.64	8.51	7.94	1.21	11.49	0.44	0.74	0.49	0.33	0.59	0.25	0	1.07	0.39	0.3	0.18	0.4	0.49	0.41	0.21	0	0.2	0.75
LAMC1	1q25.3	17.46	26.55	28.18	20.2	16.77	12.47	14.26	7.47	4.67	28.1	19.29	18.91	21.71	5.69	22.77	17.46	4.43	20.34	0.31	0	0.49	0	0.59	0	0.19	0.27	0.39	0.3	0.35	0.4	0.24	0.2	0.21	0	0.2	0.38
LAMC2	1q25.3	12.83	16.38	19.24	16.89	10.45	8.65	11.03	6.67	2.14	24.17	12.92	15.9	14.88	2.44	18.09	13.83	2.62	15.07	0.3	0.25	0.29	0.99	0	0	0.38	0.53	0.39	0.6	0	0.8	0	0.2	0.64	0.23	0.4	0
NMNAT2	1q25.3	6.33	8.44	9.43	7.28	4.54	4.07	5.7	2.67	1.56	14.2	5.66	6.64	12.2	2.44	7.02	6.35	1.01	6.78	0.29	0	0.39	0	0.39	0	0.38	0.27	0.39	0	0	0.6	0	0	0.21	0.23	0.4	0.38
SMG7	1q25.3	4.16	4.96	6.8	2.98	4.34	2.8	2.09	2.93	0.39	6.95	4.42	4.23	7.07	1.42	4.68	4.08	0.4	5.08	0.01	0	0.1	0	0	0	0	0	0	0	0	0	0	0	0	0	0	0
NCF2	1q25.3	8.85	10.92	15.65	9.27	8.09	5.09	4.75	3.73	0.39	20.24	8.32	6.64	16.34	2.24	12.13	9.52	0.2	11.11	0.1	0	0.1	0.33	0.2	0	0	0	0	0.3	0	0	0.24	0	0	0	0.4	0
ARPC5	1q25.3	8.82	11.91	14.29	11.59	7.3	4.33	6.65	2.4	0.78	13.9	10.09	11.07	11.22	3.05	11.06	8.39	0.6	10.36	0	0	0	0	0	0	0	0	0	0	0	0	0	0	0	0	0	0
RGL1	1q25.3	12.01	13.9	18.27	12.91	12.82	5.09	8.75	3.73	2.53	21.45	11.86	12.88	20.49	4.47	14.68	10.2	2.01	13.75	0.05	0	0	0.66	0	0	0	0	0	0	0	0	0	0.2	0	0	0.2	0.19
APOBEC4	1q25.3	8.78	11.66	14.19	11.59	7.3	4.33	6.65	2.4	0.78	13.6	10.09	11.07	11.22	3.05	11.06	8.39	0.6	10.36	0.03	0	0	0	0	0	0.19	0	0.19	0	0	0.2	0	0	0	0	0	0
TSEN15	1q25.3	4.2	6.45	5.93	4.3	7.5	2.29	2.66	1.33	0.19	9.97	3.54	3.22	7.07	0.61	4.68	3.4	0.6	5.46	0	0	0	0	0	0	0	0	0	0	0	0	0	0	0	0	0	0
C1orf21	1q25.3	0.8	0.25	1.46	1.32	0.2	0.25	0.95	0.27	0.39	3.32	0.89	1.41	0.98	0.41	0.85	0.68	0.2	0	0	0	0	0	0	0	0	0	0	0	0	0	0	0	0	0	0	0
EDEM3	1q25.3	12.15	17.37	19.34	12.91	10.85	9.16	9.51	4.53	3.7	21.15	13.45	11.87	16.83	6.1	17.45	12.02	4.23	11.3	0.06	0	0	0	0.2	0	0	0	0	0	0	0.2	0.24	0.41	0	0	0	0.19
FAM129A	1q25.3	9.48	13.65	16.81	8.61	8.09	6.87	7.22	3.2	1.36	18.13	7.96	8.25	13.66	2.03	11.91	11.56	1.01	11.68	0.09	0	0.1	0	0.2	0	0	0	0	0.3	0.35	0	0	0.2	0.21	0	0	0
RNF2	1q25.3	1.36	1.74	3.01	1.32	0.79	0.25	0.57	0.27	0	4.83	1.24	0.6	1.46	1.42	1.28	0.91	0	2.82	0.02	0	0	0	0	0	0	0	0	0	0.18	0	0	0	0	0	0	0
IVNS1ABP	1q25.3	0.88	1.24	1.75	1.32	0.39	0.76	0.19	0.53	0.19	3.63	1.42	0.6	0.49	0.61	0.43	0.91	0.2	1.32	0.26	0.74	0.29	0	0.39	0.51	0	0.53	0.19	0	0.18	0.6	0.24	0.41	0.43	0.45	0	0
HMCN1	1q25.3	16.26	22.58	25.27	18.54	12.43	10.43	14.64	5.33	1.95	32.63	15.93	17.1	23.17	5.69	23.4	14.74	4.23	19.4	1.66	1.99	1.75	1.32	1.38	1.78	2.85	1.6	1.95	3.93	3.19	1.41	1.22	1.42	0.64	2.04	1.61	1.51
PRG4	1q31.1	10.01	10.92	17.69	13.25	7.3	6.62	8.37	3.73	1.56	12.08	10.27	9.66	16.34	2.44	13.19	7.94	1.81	12.62	0.04	0	0.1	0.33	0.2	0	0	0	0	0	0	0	0	0	0	0	0	0
PDC	1q31.1	0.12	0.25	0.19	0	0.2	0	0	0	0	0.91	0	0	0.24	0	0	0.23	0	0.38	0.01	0	0	0	0	0	0	0	0	0	0	0	0	0	0.21	0	0	0
PTGS2	1q31.1	4.94	7.69	8.26	6.95	3.94	2.8	2.66	2.13	0.78	6.65	5.13	5.03	7.56	1.22	6.6	4.54	0.6	5.46	0.02	0	0	0	0	0	0.19	0	0	0	0	0	0	0	0	0	0	0.19
PLA2G4A	1q31.1	4.29	2.73	7.39	6.95	3.16	3.56	4.18	2.4	0.39	8.16	3.54	4.23	6.83	0.61	5.11	2.95	0.6	4.9	0	0	0	0	0	0	0	0	0	0	0	0	0	0	0	0	0	0
RGS18	1q31.2	0.17	0.25	0.1	0.33	0	0.25	0.38	0	0	0.6	0.35	0	0	0	0	0	0	0.38	0.02	0	0	0	0	0	0	0	0	0	0	0	0	0	0	0	0.2	0.19
RGS1	1q31.2	0.41	0.5	0.78	0.66	0.2	0.25	0.57	0	0	0.3	0.35	0	0.49	0.2	0	0.91	0	1.13	0.02	0	0.1	0	0	0	0	0	0.19	0	0	0	0	0	0	0	0	0
RGS13	1q31.2	1.28	1.74	3.01	2.98	1.18	1.02	0.76	0.27	0	2.11	0.71	0.2	2.44	0.41	1.06	0.91	0.2	3.2	0.02	0	0.1	0	0	0	0	0	0	0.3	0	0	0	0	0	0	0	0
RGS2	1q31.2	7.22	9.43	12.15	6.95	5.33	4.33	5.13	2.93	1.56	14.2	8.67	8.25	11.46	1.63	9.79	6.8	1.01	7.72	0.03	0	0.1	0	0	0	0	0	0	0	0	0	0	0	0	0	0	0
UCHL5	1q31.2	0.19	0	0.39	0	0	0	0	0	0	0	0	0	0.98	0	0	0.45	0	0.38	0	0	0	0	0	0	0	0	0	0	0	0	0	0	0	0	0	0
GLRX2	1q31.2	4.86	4.71	8.75	4.97	2.76	1.78	2.66	1.33	1.17	11.18	5.66	5.03	7.07	0.81	6.6	5.44	1.01	6.21	0	0	0	0	0	0	0	0	0	0	0	0	0	0	0	0	0	0
CDC73	1q31.2	6.36	6.45	10.98	6.29	3.94	2.54	4.56	1.87	1.56	11.78	7.43	6.24	9.51	0.81	8.72	6.8	1.21	8.1	0.02	0	0	0	0	0	0	0	0	0.3	0	0	0	0.2	0	0	0	0
B3GALT2	1q31.2	0.84	1.74	1.36	1.32	0.59	0.51	0.95	0.53	0	0.6	1.06	0.8	0.98	0	1.06	0	0	0.75	0.05	0	0	0	0	0.25	0	0.27	0.19	0	0.35	0	0	0	0	0	0	0
KCNT2	1q31.3	4.8	4.96	9.14	5.96	4.93	2.29	2.28	2.13	1.36	8.16	3.89	5.03	6.83	1.02	4.04	4.99	1.61	6.78	0.08	0	0	0	0	0.25	0	0.27	0	0.3	0.18	0	0	0.41	0	0	0	0
CFH	1q31.3	13.65	18.36	23.91	14.9	9.86	7.12	10.65	4.53	2.33	22.36	16.46	14.89	19.02	3.66	16.17	12.02	3.22	16.38	0.15	0.74	0.1	0.33	0	0	0.19	0	0.19	0	0	0.2	0	0.2	0	0.23	0.2	0.38
CFHR1	1q31.3	2.88	5.21	5.15	1.99	1.58	1.27	2.09	1.33	0.19	4.53	1.95	3.02	4.39	0.2	1.91	2.49	0.2	3.77	0.06	0	0	0	0	0	0.19	0.27	0	0	0	0	0	0.41	0	0	0	0
CFHR2	1q31.3	8.3	10.17	14.19	11.26	7.3	4.33	6.08	2.67	0.58	12.39	7.26	9.26	12.44	2.24	10.43	9.3	1.01	10.17	0.09	0	0.1	0	0.39	0	0	0.27	0.19	0.3	0	0	0	0	0.43	0	0	0.19
CFHR3	1q31.3	4.25	5.21	8.26	5.3	2.76	1.78	3.04	0.8	0.58	9.97	4.07	3.82	6.59	0.81	4.26	4.99	0.4	4.9	0.05	0.25	0	0	0	0	0.19	0	0	0	0	0	0	0	0	0	0	0
CFHR5	1q31.3	9.89	12.66	16.23	6.62	8.68	5.34	8.56	2.67	1.95	15.71	11.15	13.08	12.68	3.05	14.89	8.16	2.21	12.24	0.34	0	0.49	0.33	0.39	0.25	0	0.8	0.58	0.3	0.18	0.4	0.24	0.61	0.21	0.91	0	0.38
F13B	1q31.3	14.1	17.37	23.91	11.26	13.02	8.65	10.46	4.53	4.47	22.05	15.04	17.1	20.73	4.27	19.15	11.79	3.82	17.89	0.11	0	0.1	0	0.2	0.25	0	0.27	0	0.3	0.18	0.2	0	0	0	0.23	0.2	0
ASPM	1q31.3	18.07	21.59	27.02	17.55	16.37	12.21	13.5	5.6	5.06	29	21.95	21.73	26.34	7.52	24.04	15.65	4.83	22.22	1.07	0.74	1.36	1.66	0.79	1.78	1.33	0.8	1.95	1.21	2.3	1.01	0.49	0.41	0.64	0.45	1.41	0.94
ZBTB41	1q31.3	8.63	10.17	14.87	9.27	10.65	5.34	5.89	1.6	0.39	16.62	7.96	8.85	11.22	2.03	11.91	7.94	2.01	12.24	0.01	0	0	0	0	0	0	0	0.19	0	0	0	0	0	0	0	0	0
CRB1	1q31.3	7.68	10.42	13.22	5.3	4.73	3.82	7.03	2.13	1.56	14.5	5.66	6.64	10.49	1.42	10.64	9.07	0.6	9.23	1.1	0.74	1.17	0.99	0.99	1.02	1.33	0.53	0.78	0.3	0.35	1.21	1.95	0.81	1.49	0.91	1.61	0.75
LHX9	1q31.3	3.47	3.97	6.51	4.3	3.16	1.53	3.23	1.6	0.58	6.95	2.48	2.82	6.34	0.41	2.98	2.27	0.4	5.46	0.16	0.25	0.39	0	0	0.25	0.19	0	0	0	0.18	0.2	0.24	0	0	0.23	0.4	0.19
NEK7	1q31.3	1.94	1.99	4.28	0.99	2.37	0.25	1.52	1.07	0.58	2.72	2.3	1.61	2.93	0.2	2.34	2.04	0.6	2.64	0.01	0	0	0	0	0.25	0	0	0	0	0	0	0	0	0	0	0	0
ATP6V1G3	1q31.3	0.9	0.25	2.43	0.99	0.59	0	0.76	0.27	0	2.11	0.53	0.4	0.98	0	0.85	0.68	0.2	1.88	0.02	0	0	0	0	0	0.19	0	0	0	0.18	0	0	0	0	0	0	0
PTPRC	1q31.3	5.66	6.95	9.52	4.97	5.72	3.56	4.94	2.67	1.56	10.88	5.66	4.63	8.29	1.22	7.02	5.9	1.41	6.21	0.3	0.25	0.1	0.66	0.2	0	0.19	0.53	0	0.6	0.53	0.4	0.24	0	0.21	0.91	0.4	0.19
NR5A2	1q32.1	10.74	15.63	18.27	8.61	11.24	6.36	9.89	4.27	0.97	14.5	10.97	11.07	16.34	1.22	12.13	10.88	1.41	11.11	0.2	0.5	0.1	0	0.39	0.51	0.19	0	0.58	0.3	0	0	0	0.2	0.21	0.23	0.2	0.19
ZNF281	1q32.1	0.9	0.5	2.14	0.99	0.59	0.25	1.14	0.53	0.19	2.11	1.24	0.6	0.98	0	0.85	0.45	0	1.32	0.02	0	0	0	0.2	0	0	0	0	0	0	0	0	0	0	0.23	0	0
KIF14	1q32.1	13.4	18.11	22.64	13.91	12.23	8.91	9.13	6.13	3.11	20.24	14.34	14.49	20	3.25	16.81	13.38	2.41	16.2	0.4	0	0.29	0	0.79	0.51	0.57	0.53	0	0.3	0.18	0.8	0.49	0.2	1.06	0.23	0.8	0.56
DDX59	1q32.1	6.66	8.93	10.98	7.62	5.33	4.07	3.04	1.6	0.39	11.78	6.55	7.85	12.44	1.42	6.17	6.35	1.61	8.29	0.11	0.25	0	0	0.2	0	0.38	0	0.58	0.3	0	0	0	0.2	0	0	0	0
C1orf106	1q32.1	7.21	9.93	10.98	7.62	6.51	3.82	5.32	4	0	12.39	5.84	7.24	12.44	1.63	10.21	7.71	0.8	9.23	0.05	0.25	0	0.33	0	0	0	0	0.19	0	0	0	0	0.2	0	0	0	0
KIF21B	1q32.1	15.43	20.84	24	20.53	15.98	10.94	10.84	9.33	3.11	25.98	15.75	15.49	21.95	5.49	18.3	14.51	2.82	19.21	0.27	0	0.19	0	0.79	0.51	0.19	0	0	0	0	0	0	0.2	0	0.91	0.8	0.38
CACNA1S	1q32.1	21.09	27.54	35.08	26.49	17.75	15.52	17.68	11.2	3.7	28.4	23.89	20.32	27.8	4.47	28.3	18.59	4.43	25.42	3.02	3.47	2.82	1.66	3.75	2.54	3.8	4.27	3.7	3.93	2.3	2.82	3.17	2.85	1.49	2.27	4.23	3.01
TMEM9	1q32.1	8.22	10.92	13.51	8.61	7.5	3.82	4.94	2.67	1.75	17.82	9.56	8.05	12.2	1.83	11.06	9.3	1.61	9.42	0.01	0	0	0	0	0	0	0	0	0	0	0	0	0	0	0.23	0	0
PKP1	1q32.1	12.3	13.65	18.66	12.91	11.05	9.41	8.37	4.53	5.25	19.94	11.68	13.68	20.24	4.47	14.26	13.15	3.82	13.94	0.14	0.25	0.29	0.33	0	0	0.19	0	0.19	0	0.35	0.2	0.24	0	0.21	0	0	0
TNNT2	1q32.1	22.05	29.78	33.33	23.18	19.33	16.54	16.92	11.47	5.25	37.76	23.19	22.54	35.12	7.32	29.36	21.09	6.04	23.92	0.48	0.5	0.58	0.66	0.2	0.51	0.76	0.53	0.39	0.3	1.24	0.4	0.24	0.61	0.43	0.45	0.8	0
LAD1	1q32.1	18.36	24.81	28.67	20.2	14	12.72	13.5	9.6	2.92	33.23	20.18	17.51	28.54	4.88	25.74	17.23	4.23	20.34	0.05	0	0.19	0	0	0	0	0	0	0	0	0.2	0	0.2	0.21	0	0	0
PHLDA3	1q32.1	1.72	1.24	3.21	1.32	1.38	2.29	2.09	0	0.39	4.53	1.95	1.41	2.68	0.41	1.06	2.04	0.6	1.88	0	0	0	0	0	0	0	0	0	0	0	0	0	0	0	0	0	0
CSRP1	1q32.1	0.93	0.5	2.14	0.99	1.18	1.27	1.14	0	0	1.21	1.24	0.8	1.46	0.2	0.21	1.13	0	1.13	0.17	0	0.1	0.33	0.39	0.25	0.19	0	0	0.3	0.18	0	0.73	0	0.21	0	0.2	0.19
IPO9	1q32.1	10.93	12.66	19.83	10.6	9.47	6.11	7.41	6.67	1.17	21.45	9.91	10.46	16.59	2.24	15.32	8.62	0.8	15.82	0.01	0	0	0	0	0	0	0	0	0	0	0	0.24	0	0	0	0	0
SHISA4	1q32.1	10.93	12.66	19.83	10.6	9.47	6.11	7.41	6.67	1.17	21.45	9.91	10.46	16.59	2.24	15.32	8.62	0.8	15.82	0.03	0	0.1	0	0	0	0	0	0	0	0	0	0	0	0	0	0.4	0
TIMM17A	1q32.1	13.56	19.85	22.74	13.58	12.82	11.45	9.7	4.53	2.14	20.54	14.51	14.69	23.17	2.03	18.09	13.38	2.82	15.07	0.01	0	0	0	0	0	0	0.27	0	0	0	0	0	0	0	0	0	0
RNPEP	1q32.1	13.59	20.1	22.74	13.58	12.82	11.45	9.89	4.53	2.14	20.54	14.51	14.69	23.17	2.03	18.09	13.61	2.82	15.07	0.1	0	0.1	0	0	0.51	0	0	0	0	0	0.2	0.73	0	0.21	0	0.2	0
ELF3	1q32.1	13.1	19.11	21.96	13.25	12.43	11.2	9.7	3.73	1.95	20.24	13.63	14.29	22.44	1.83	17.87	13.15	2.82	14.12	0	0	0	0	0	0	0	0	0	0	0	0	0	0	0	0	0	0
GPR37L1	1q32.1	5.49	8.44	9.62	3.97	4.54	3.31	5.51	1.6	0.58	14.5	5.84	4.23	8.29	0.81	6.38	5.22	0.6	7.53	0.01	0	0	0	0	0	0.19	0	0	0	0	0	0	0	0	0	0	0
ARL8A	1q32.1	5.49	8.44	9.62	3.97	4.54	3.31	5.51	1.6	0.58	14.5	5.84	4.23	8.29	0.81	6.38	5.22	0.6	7.53	0	0	0	0	0	0	0	0	0	0	0	0	0	0	0	0	0	0
PTPN7	1q32.1	6.53	10.17	10.88	5.63	4.93	3.31	6.84	1.87	0.97	15.11	7.08	4.23	9.02	1.22	9.36	5.9	0.8	9.42	0.27	0.25	0.58	0.66	0	0	0.19	0	0.19	0	0.18	0.2	0	0.2	0.21	0.23	0.2	0.38
LGR6	1q32.1	15.08	17.62	24.49	17.22	10.45	12.72	11.41	5.6	2.92	19.34	18.23	13.08	24.15	3.86	18.94	15.42	3.02	19.96	0.22	0.25	0.1	0.33	0.39	0.25	0.19	0	0.39	0.91	0.35	0.4	0	0	0	0.23	0.2	0.38
UBE2T	1q32.1	14.14	17.37	23.91	14.24	9.07	12.21	11.22	6.4	2.33	17.82	16.46	14.08	25.61	3.25	19.57	12.47	1.81	17.7	0.01	0	0	0	0	0.25	0	0	0	0	0	0	0	0	0	0	0	0
PPP1R12B	1q32.1	1.66	1.49	3.69	2.98	0.99	1.53	1.71	0.27	0.58	2.72	1.24	1.21	1.95	1.02	0.64	0.68	0	3.39	0.12	0	0.1	0	0.39	0.25	0.38	0	0.19	0	0	0.4	0	0.2	0	0	0	0
SYT2	1q32.1	9.92	13.65	17.3	9.27	9.07	5.6	7.22	4	1.75	16.01	10.27	11.67	14.15	1.42	13.83	9.52	1.81	12.05	0.01	0	0	0	0	0	0	0	0	0	0.18	0	0	0	0	0	0	0
KDM5B	1q32.1	12.85	17.37	21.19	15.23	10.85	6.87	11.22	5.6	2.72	21.45	12.92	14.29	18.05	3.05	18.72	12.7	0.8	15.25	0.38	0.74	0.29	0.66	0.59	0.76	0.95	0.27	0.19	0.3	0.35	0.8	0.49	0.2	0.21	0.23	0.4	0.19
RABIF	1q32.1	6.89	7.69	11.66	6.95	6.31	4.33	4.56	2.13	0.39	9.67	7.96	6.04	14.63	1.22	8.94	6.8	0	7.91	0.06	0	0.1	0	0	0.25	0	0	0.19	0	0	0.2	0.24	0	0	0	0	0
KLHL12	1q32.1	7.71	9.18	12.83	7.95	7.5	5.09	4.94	2.4	0.39	11.78	8.85	6.64	15.85	1.22	10.43	7.94	0.2	8.47	0.06	0	0	0	0	0.25	0	0.27	0.19	0.3	0	0.4	0	0	0	0	0	0
ADIPOR1	1q32.1	11.12	12.16	18.85	14.9	9.66	7.63	8.37	4	1.36	18.73	12.04	9.66	19.02	2.44	14.47	12.93	0.8	12.24	0.07	0	0	0	0.2	0.76	0.19	0	0	0	0.18	0	0	0	0	0	0.2	0
CYB5R1	1q32.1	11.1	12.16	18.76	14.9	9.66	7.63	8.37	4	1.36	18.73	12.04	9.66	19.02	2.44	14.47	12.93	0.8	12.24	0.29	0.25	0.19	0	0.2	0.25	0.38	0.27	0.19	0	0.35	0.8	0.73	0.2	0	0.68	0	0.38
MYOG	1q32.1	7.4	8.19	11.86	7.62	6.51	4.07	5.32	2.93	0.58	14.5	6.73	5.03	10	2.03	10.21	7.26	1.41	7.53	0.08	0.25	0	0	0.2	0.25	0	0	0	0	0	0	0.24	0	0	0.23	0	0.19
ADORA1	1q32.1	12.55	16.63	19.63	15.56	13.41	6.62	9.32	4.27	2.72	23.57	12.57	11.07	20.49	2.03	16.6	15.65	2.82	14.31	0.05	0.25	0	0	0	0	0.19	0	0.19	0	0.18	0	0	0	0	0.23	0	0
MYBPH	1q32.1	13.78	17.87	21.77	15.89	14.99	7.38	10.08	4.53	2.92	26.28	13.45	12.47	22.93	2.24	18.94	17.01	2.82	15.44	0.16	0.25	0.29	0	0	0	0.38	0	0	0	0.35	0	0.49	0	0.21	0.45	0.4	0
CHI3L1	1q32.1	14.76	20.84	23.23	18.54	16.17	9.16	9.7	6.93	3.7	30.82	14.87	13.08	22.93	3.05	20.21	17.69	3.02	16.38	0.17	0.25	0.1	0	0.2	0	0	0	0	0	0.18	0	0.98	0	0.21	0	0.2	0.38
CHIT1	1q32.1	14	18.61	22.06	17.88	15.19	8.91	9.7	6.93	3.11	29.61	14.51	13.08	21.46	2.64	19.79	15.19	2.41	15.82	0.16	0	0.39	0	0.2	0.25	0	0	0.19	0	0.18	0	0.49	0	0.43	0	0.2	0.19
BTG2	1q32.1	3.21	3.72	4.76	6.29	1.78	1.78	2.85	2.4	0.58	7.25	2.3	2.62	6.59	0.61	3.19	2.95	0.2	4.14	0	0	0	0	0	0	0	0	0	0	0	0	0	0	0	0	0	0
FMOD	1q32.1	3.21	3.72	4.76	6.29	1.78	1.78	2.85	2.4	0.58	7.25	2.3	2.62	6.59	0.61	3.19	2.95	0.2	4.14	0.07	0	0.1	0	0.2	0	0.19	0	0.19	0	0	0	0.49	0	0.21	0	0	0
PRELP	1q32.1	5.45	7.44	11.18	4.97	1.97	6.11	3.42	2.67	1.75	12.39	4.25	4.02	5.12	1.02	5.32	4.99	1.01	6.21	0.14	0.25	0.1	0	0	0.25	0	0	0.19	0	0.35	0.2	0.24	0.2	0	0	0.4	0.19
OPTC	1q32.1	5.45	7.44	11.18	4.97	1.97	6.11	3.42	2.67	1.75	12.39	4.25	4.02	5.12	1.02	5.32	4.99	1.01	6.21	0.03	0	0	0	0	0	0	0	0	0.3	0	0	0	0	0	0	0.2	0.19
ATP2B4	1q32.1	9.16	9.18	17.01	10.93	7.3	7.63	6.27	4.53	2.53	15.41	7.43	8.25	14.39	1.42	8.94	9.98	1.21	10.73	1.01	0.5	0.97	1.66	0.99	0.76	1.14	1.07	1.17	1.21	0.53	0	1.71	1.42	0.85	1.13	0.8	1.13
LAX1	1q32.1	13.11	16.13	23.13	14.24	8.88	10.43	10.46	5.33	2.72	22.05	11.86	11.87	22.44	1.02	17.45	11.34	1.61	15.63	0.05	0	0.1	0	0	0	0	0.27	0	0.3	0	0	0.24	0	0	0	0	0
ZC3H11A	1q32.1	9.19	10.92	14.87	10.93	7.1	7.63	9.7	3.73	1.17	10.27	9.38	9.66	15.85	2.24	13.4	11.11	0.8	13.18	0	0	0	0	0	0	0	0	0	0	0	0	0	0	0	0	0	0
SNRPE	1q32.1	9.19	10.92	14.87	10.93	7.1	7.63	9.7	3.73	1.17	10.27	9.38	9.66	15.85	2.24	13.4	11.11	0.8	13.18	0	0	0	0	0	0	0	0	0	0	0	0	0	0	0	0	0	0
ETNK2	1q32.1	12.9	15.63	21.77	11.59	10.85	11.96	10.08	5.6	2.92	23.26	11.68	13.68	16.34	3.46	12.34	11.79	2.62	17.51	0.05	0	0	0	0	0	0.19	0	0	0	0.18	0.2	0	0	0	0	0	0.38
REN	1q32.1	14.41	18.61	23.42	12.91	13.61	13.23	11.22	6.13	3.31	24.17	13.63	15.09	19.27	3.66	15.11	14.06	3.22	19.4	0.1	0	0	0.66	0	0	0.38	0	0	0	0	0.2	0	0	0	0.45	0	0.19
GOLT1A	1q32.1	17.04	20.35	26.92	17.22	15.19	15.01	14.64	5.6	5.25	25.68	17.35	18.51	24.39	4.27	22.55	16.78	3.22	20.53	0.01	0	0	0	0	0	0	0	0	0	0	0	0	0	0	0	0.2	0
PLEKHA6	1q32.1	14.8	18.36	21.28	17.88	12.23	12.72	12.93	5.87	5.64	23.26	13.27	16.1	21.22	4.06	18.94	16.33	3.02	16.2	0.1	0.74	0.29	0	0	0	0	0	0	0	0	0	0	0.2	0.21	0.23	0	0
PPP1R15B	1q32.1	13.13	16.38	20.02	17.55	9.86	13.74	8.75	6.67	4.86	22.05	13.63	13.28	17.32	3.05	15.96	11.79	3.02	15.44	0.02	0	0	0	0	0	0	0	0	0	0	0	0	0	0.21	0.23	0	0
PIK3C2B	1q32.1	16.31	19.35	25.27	22.52	13.61	16.54	13.31	9.07	6.42	26.59	16.28	17.3	21.46	4.88	18.72	14.06	3.22	18.46	0.56	1.49	0.68	0.66	0.39	0.76	0	0	0.58	0.91	0.71	0.6	0.49	0.61	0.43	0.45	0.6	0.94
MDM4	1q32.1	8.21	10.92	13.02	7.28	6.9	8.65	6.65	2.93	2.92	12.99	8.32	8.05	13.41	1.42	9.79	8.62	1.61	9.23	0	0	0	0	0	0	0	0	0	0	0	0	0	0	0	0	0	0
LRRN2	1q32.1	9.3	13.15	14.58	8.94	8.48	9.92	6.84	4	2.92	15.41	7.61	9.05	15.12	2.44	12.13	9.98	2.62	9.23	0.04	0	0.1	0	0.2	0	0	0.27	0	0	0	0	0	0	0	0	0	0.19
NFASC	1q32.1	17.51	20.6	28.67	19.21	16.57	16.54	13.5	9.6	6.42	21.75	17.17	20.32	24.15	4.27	19.36	15.87	4.23	19.96	0.25	0	0.1	0.33	0.2	0	0	0.27	0.19	0	0	0.6	0.49	0.81	0.43	0.68	0.4	0
CNTN2	1q32.1	12.76	15.63	20.7	16.56	10.45	9.92	10.27	4.8	3.31	27.79	12.92	12.07	21.46	3.05	15.74	11.79	1.21	14.88	0.3	0	0.58	0.33	0	0.51	0	0.27	0.58	0	0.35	0	0	0.2	0.21	0.45	0.4	0.56
TMEM81	1q32.1	12.73	15.88	20.6	16.89	10.45	10.18	10.27	4.53	3.11	27.79	12.92	11.87	21.46	3.05	16.17	11.79	1.21	14.88	0.05	0	0	0	0	0	0	0	0	0	0.18	0	0.49	0	0	0	0.2	0
RBBP5	1q32.1	13.35	16.87	21.77	17.22	11.05	10.69	10.46	5.07	3.31	29	13.45	12.27	22.68	3.05	16.6	12.47	1.41	15.25	0	0	0	0	0	0	0	0	0	0	0	0	0	0	0	0	0	0
DSTYK	1q32.1	7.41	6.95	13.8	5.96	5.92	8.91	5.13	3.73	1.36	15.11	4.78	6.04	14.39	0.61	10.43	6.35	0.8	7.91	0.31	0.5	0.29	0.33	0.39	0	0.19	0.27	0.39	0	0.35	0.4	0.24	0	0	0	1.01	0.38
TMCC2	1q32.1	5.22	6.95	9.43	5.96	3.94	3.31	3.04	2.67	1.36	7.85	4.96	4.83	6.59	0.81	7.66	4.31	0.4	7.34	0	0	0	0	0	0	0	0	0	0	0	0	0	0	0	0	0	0
NUAK2	1q32.1	16.35	23.33	25.95	18.21	12.43	15.52	11.22	6.67	4.67	21.15	15.93	16.9	22.44	3.46	20	17.91	3.02	21.47	0.12	0	0.1	0	0	0	0.19	0	0.39	0	0	0	0.24	0	0.21	0.23	0.4	0.38
KLHDC8A	1q32.1	13.95	20.1	21.38	15.56	9.66	13.74	10.27	5.87	3.7	18.43	12.92	14.69	20.49	3.05	15.74	17.01	2.82	18.27	0.16	0	0.29	0	0	0.25	0	0.27	0	0	0	0	0.24	0	0.21	0.23	0.2	0.38
LEMD1	1q32.1	0.69	1.24	1.85	0.66	0.79	0	0.19	0	0	0.6	1.24	1.21	0.49	0.2	0.21	0.45	0	0.75	0.03	0	0	0.33	0	0	0	0	0	0	0	0.2	0	0	0	0.23	0	0
CDK18	1q32.1	7.71	11.91	12.93	8.28	5.13	6.62	5.13	3.2	1.75	11.48	6.9	7.85	11.22	1.42	10.85	9.75	1.01	8.1	0.22	0	0.29	0.33	0.39	0	0.38	0.27	0	0	0.35	0.2	0.24	0	0.64	0.23	0.2	0.19
MFSD4	1q32.1	13.28	18.36	20.8	14.57	11.05	12.72	12.17	5.33	2.92	17.82	11.33	14.89	19.51	3.25	17.02	15.65	2.82	15.07	0.11	0	0.29	0.66	0	0	0	0.27	0.19	0	0.18	0	0.24	0	0	0	0	0
ELK4	1q32.1	13.77	18.86	21.19	15.23	11.83	12.98	12.36	5.33	2.92	18.73	11.68	15.49	20.49	3.86	17.02	16.78	3.22	15.63	0	0	0	0	0	0	0	0	0	0	0	0	0	0	0	0	0	0
SLC45A3	1q32.1	2.84	2.23	4.28	4.3	2.17	0.51	1.71	0.27	0	7.55	1.77	2.62	5.12	1.22	3.62	4.76	0.8	4.52	0.23	0.25	0.49	0.33	0	0.25	0.57	0	0.39	0.6	0	0.4	0.24	0.2	0	0	0.2	0.38
NUCKS1	1q32.1	4.06	4.96	7.77	3.64	3.35	2.8	3.23	1.87	0.78	3.32	4.42	4.83	8.05	1.63	4.26	3.85	0.4	5.27	0	0	0	0	0	0	0	0	0	0	0	0	0	0	0	0	0	0
SLC41A1	1q32.1	17.36	21.34	28.57	20.86	15.38	14.5	13.12	6.67	2.72	27.79	14.69	17.1	29.51	4.06	19.79	18.14	3.22	22.03	0.01	0	0	0	0	0	0	0	0	0	0	0	0	0.2	0	0	0	0
PM20D1	1q32.1	17.36	21.34	28.57	20.86	15.38	14.5	13.12	6.67	2.72	27.79	14.69	17.1	29.51	4.06	19.79	18.14	3.22	22.03	0.15	0	0.19	0	0.2	0	0.38	0	0	0	0.18	0.2	0.24	0	0.21	0	0	0.38
SLC26A9	1q32.1	10.29	11.66	18.56	15.23	7.69	7.12	8.56	3.47	2.92	20.54	10.09	8.45	14.63	3.05	11.06	7.94	1.01	15.07	1.2	1.49	0.78	1.99	0.59	1.27	1.14	0.8	1.17	0.6	1.24	0.8	0.98	1.63	1.49	1.81	1.21	1.51
AVPR1B	1q32.1	2.47	1.74	4.37	2.32	0.59	2.29	2.47	1.07	0.19	4.83	2.83	3.42	2.2	0.41	3.19	1.59	0.4	3.58	0.05	0	0	0	0	0	0	0	0	0	0	0	0.24	0	0	0.23	0	0
CTSE	1q32.1	4.99	6.2	8.36	4.97	4.34	2.8	3.42	1.6	0.78	8.46	5.66	7.04	7.07	1.22	4.89	4.31	0.8	7.16	0.15	0	0.19	0.33	0.39	0	0.38	0	0.19	0.3	0.18	0	0.24	0	0	0	0.4	0.38
IKBKE	1q32.1	11.28	15.88	19.05	12.91	8.48	7.38	7.98	4.53	3.7	19.34	9.91	12.68	15.37	3.46	13.4	9.75	2.21	12.99	0.02	0	0	0	0	0	0	0	0	0	0	0	0.24	0	0	0	0.2	0
RASSF5	1q32.1	2.04	2.23	4.28	1.99	1.18	0.76	1.9	0.8	0.58	3.63	1.95	2.01	2.68	0.2	1.91	2.72	0.6	2.07	0	0	0	0	0	0	0	0	0	0	0	0	0	0	0	0	0	0
DYRK3	1q32.1	3.78	2.48	8.16	5.96	4.34	2.8	3.04	1.6	0.19	4.83	2.65	3.42	6.1	1.63	2.77	2.49	0.2	4.14	0.05	0	0	0	0	0	0.19	0	0.39	0	0	0	0	0	0.21	0	0	0
MAPKAPK2	1q32.1	8.35	10.67	13.61	8.94	6.71	7.12	7.22	2.13	0.39	14.5	8.85	9.46	13.66	1.42	10	8.16	1.01	9.79	0	0	0	0	0	0	0	0	0	0	0	0	0	0	0	0	0	0
IL10	1q32.1	10.45	11.41	17.01	11.26	8.28	7.38	9.13	2.4	0.97	19.34	10.8	12.07	15.85	2.44	13.4	10.2	1.81	12.43	0.05	0.25	0	0	0	0.51	0	0	0	0.3	0	0	0	0	0	0.23	0	0
IL19	1q32.1	3.14	2.23	8.07	1.66	2.96	2.04	1.71	0.53	1.17	6.34	3.01	2.82	5.37	0.61	0.64	1.81	0.4	5.27	0.02	0	0	0	0.2	0	0	0	0	0	0	0	0	0.2	0	0	0	0
IL20	1q32.1	10.46	11.41	18.85	8.94	9.07	6.87	7.98	2.4	1.75	18.43	11.86	11.47	18.29	1.83	11.06	10.88	1.21	13.18	0.21	0	0.1	0.33	0.2	0.25	0	0.8	0	0.6	0	0.4	0.49	0.61	0.21	0	0.2	0.19
IL24	1q32.1	13.79	16.63	22.74	13.91	11.64	13.23	10.84	3.73	2.33	23.87	17.17	16.5	22.68	3.86	16.17	14.74	3.22	16.57	0	0	0	0	0	0	0	0	0	0	0	0	0	0	0	0	0	0
FAIM3	1q32.1	13.79	16.63	22.74	13.91	11.64	13.23	10.84	3.73	2.33	23.87	17.17	16.5	22.68	3.86	16.17	14.74	3.22	16.57	0.02	0.25	0	0	0	0	0	0.27	0	0	0	0	0	0	0	0	0	0
PIGR	1q32.1	13.57	16.63	22.25	13.58	11.44	13.23	10.27	3.73	2.14	23.87	16.99	16.3	21.71	3.86	16.17	14.74	3.22	15.82	0.02	0	0	0	0	0	0	0	0	0	0	0.2	0	0	0	0	0	0
C1orf116	1q32.1	2.24	2.23	5.54	2.32	1.18	2.29	2.66	0.53	0.58	2.72	2.48	1.41	3.41	1.42	1.28	1.36	0.2	3.95	0.04	0	0	0	0	0.25	0	0	0	0	0	0.2	0	0.2	0.21	0	0	0
YOD1	1q32.2	13.73	16.87	23.71	14.57	11.64	8.65	10.46	3.73	3.11	19.64	16.46	13.68	21.46	5.28	16.17	12.47	2.21	19.02	0	0	0	0	0	0	0	0	0	0	0	0	0	0	0	0	0	0
PFKFB2	1q32.2	14.99	18.36	24.98	14.9	14.6	8.4	10.27	5.07	3.11	24.47	17.17	15.69	23.9	4.67	17.87	13.15	3.42	19.4	0.23	0.25	0.29	0	0	0	0.38	0.27	0.19	0.3	0.53	0.2	0	0.2	0	0.23	0.2	0
C4BPB	1q32.2	12.81	16.13	21.77	13.25	11.44	7.63	8.94	3.47	2.72	19.03	15.58	12.68	20.73	4.27	15.32	11.34	2.21	17.14	0.01	0	0	0	0	0	0	0	0	0	0	0	0	0	0	0	0.2	0
C4BPA	1q32.2	13.69	15.88	22.84	14.9	10.85	7.89	10.84	5.33	1.36	23.87	13.81	15.9	22.44	3.46	16.38	14.51	2.41	18.27	0.07	0	0	0	0	0	0	0.27	0	0	0	0	0.24	0.2	0	0.45	0	0
CD55	1q32.2	3.89	4.47	6.51	5.63	2.96	1.78	2.28	1.87	0.19	6.95	3.72	5.03	7.56	0.2	3.19	3.17	0	4.9	0.08	0.25	0	0	0.2	0	0.19	0.53	0	0	0.35	0	0	0	0.21	0	0	0
CR2	1q32.2	12.81	16.38	21.28	14.57	10.06	8.4	8.37	5.33	3.31	17.82	13.98	16.1	15.37	3.86	14.68	13.15	2.21	17.33	0.41	0.99	0.39	0.33	0.39	0	0.38	0.27	0.78	0.91	0.18	0.2	0.24	0.81	0.21	0.23	0.4	0.56
CD46	1q32.2	5.32	6.45	7.68	4.97	4.34	1.78	3.8	2.4	0.97	6.95	7.08	7.24	7.8	0.61	9.36	5.9	0.8	6.03	0.05	0	0.1	0	0	0.25	0	0	0	0	0	0	0	0	0.21	0	0	0
CD34	1q32.2	7.3	11.41	12.44	6.62	6.31	4.58	4.37	2.13	1.17	12.08	6.73	7.44	13.41	1.22	10.21	8.39	0.6	7.34	0.02	0	0	0	0	0	0	0.27	0	0	0	0	0	0	0.21	0	0	0
PLXNA2	1q32.2	17.46	22.58	26.43	23.51	15.98	13.49	12.55	6.67	4.47	26.89	19.11	18.11	28.29	7.93	19.15	16.78	3.82	18.83	0.23	0	0.1	0	0.59	0.25	0.19	0.53	0.19	0.3	0.35	0.2	0	0	0	0.45	0.4	0.38
CAMK1G	1q32.2	21.17	27.3	33.53	21.85	19.33	12.72	17.87	9.07	5.06	32.93	23.54	21.33	30.24	8.13	26.38	21.09	5.03	24.86	0	0	0	0	0	0	0	0	0	0	0	0	0	0	0	0	0	0
LAMB3	1q32.2	22.13	28.54	34.21	23.84	20.51	14.25	18.82	9.33	5.84	34.14	24.6	22.74	32.44	8.74	26.81	22.45	5.63	25.61	0.24	0.74	0.39	0.33	0	0.51	0	0.53	0.19	0.3	0.18	0.2	0.49	0.2	0.21	0	0.2	0.19
HSD11B1	1q32.2	5.23	7.94	6.9	3.64	3.75	5.09	3.23	2.13	0.19	8.46	4.42	6.84	8.78	0.81	8.3	5.9	0.6	6.4	0.05	0	0	0	0.2	0.25	0.19	0	0	0	0	0	0	0	0	0	0	0.19
C1orf74	1q32.2	9.71	10.42	14.87	13.58	6.31	5.09	8.17	5.33	2.14	17.82	10.44	11.27	14.15	2.85	13.19	10.88	2.21	11.49	0.01	0	0	0	0	0	0	0	0	0	0	0	0	0.2	0	0	0	0
IRF6	1q32.2	9.64	10.42	14.87	13.58	6.31	5.09	8.17	5.33	2.14	17.82	10.27	11.07	14.15	2.85	12.98	10.66	2.21	11.49	0.32	0.25	0.49	0	0.39	0.25	0.19	0.27	0.39	0.3	0.18	0.4	0	0.2	0.21	0.68	0.8	0.19
SYT14	1q32.2	2.86	2.73	5.05	2.32	1.97	1.78	2.47	0.27	0.78	4.53	2.83	4.02	5.12	1.22	3.62	3.17	0.8	3.01	0.02	0	0	0	0	0	0	0	0.19	0	0	0	0	0	0	0	0	0
SERTAD4	1q32.2	0.48	1.49	1.17	0.33	0.39	0.25	0.38	0.27	0.19	0	0.35	0	1.22	0.2	0.85	0.23	0	0.38	0.02	0	0	0	0	0.25	0	0	0.19	0	0	0	0	0	0	0	0	0
HHAT	1q32.2	11.5	13.65	19.24	9.6	10.06	6.87	7.98	2.4	2.33	22.36	12.74	12.47	18.78	3.86	15.74	12.02	1.61	12.24	0.11	0.25	0.29	0	0.2	0	0	0	0	0	0.18	0.2	0.24	0	0.21	0.23	0.2	0
KCNH1	1q32.2	11.11	14.14	17.69	12.58	10.26	9.67	7.79	4.27	1.17	16.01	11.15	14.29	22.44	3.25	15.53	8.16	0.6	11.86	0.8	0.99	1.07	1.32	0.79	0.51	0.57	1.07	0.39	1.21	1.77	0.6	0.49	0.2	0.21	1.13	1.21	0.75
RCOR3	1q32.2	7.85	11.66	12.83	8.61	7.3	5.09	5.51	2.4	1.56	9.37	8.14	7.85	10.73	2.24	10.64	5.22	2.21	9.23	0.01	0	0	0	0	0	0	0	0	0	0	0	0.24	0	0	0	0	0
TRAF5	1q32.2	2.78	3.72	5.44	0.99	1.78	2.54	1.33	0.8	0.97	5.74	2.3	3.02	4.63	0.2	4.68	2.49	0.6	2.82	0.13	0.25	0.1	0	0.39	0	0.38	0	0.19	0	0.18	0	0.24	0.41	0.21	0	0.2	0
RD3	1q32.3	0.42	0.99	0.49	1.32	0.59	0	0.76	0	0.39	0.91	0.35	0.6	0.49	0	0.43	0.23	0	0.38	0.01	0	0	0	0	0	0	0	0	0	0	0.2	0	0	0	0	0	0
SLC30A1	1q32.3	0.02	0	0.1	0	0	0	0	0	0	0	0	0	0	0	0	0	0	0	0	0	0	0	0	0	0	0	0	0	0	0	0	0	0	0	0	0
NEK2	1q32.3	8.1	11.17	13.22	9.6	5.33	4.33	4.75	4	0.58	13.6	7.26	9.86	13.17	2.64	11.06	8.16	1.01	11.86	0.1	0	0	0	0.2	0	0.19	0	0.19	0	0.18	0.2	0	0	0.21	0.23	0.2	0
LPGAT1	1q32.3	0.24	0.5	0.39	0	0.39	0	0.38	0	0.19	0.3	0.35	0.2	0	0.41	0.21	0	0	0.19	0.11	0	0	0	0.2	0.25	0	0	0.39	0.3	0	0	0	0	0	0.45	0.2	0.19
INTS7	1q32.3	1.98	1.74	3.89	1.99	2.96	1.02	1.71	1.33	0.39	3.63	1.42	2.62	4.15	0.81	1.06	1.81	0.6	1.32	0.02	0	0.1	0	0	0	0	0	0	0	0	0	0	0	0	0.23	0	0
DTL	1q32.3	8.44	8.93	13.41	8.61	8.68	6.36	6.84	4	2.33	12.08	6.73	9.46	15.37	3.25	11.49	8.16	0.8	8.29	0.1	0	0.1	0.33	0.2	0.25	0	0	0.39	0.3	0	0	0.24	0	0	0.23	0	0.19
PPP2R5A	1q32.3	4.69	4.22	8.55	2.98	4.34	4.58	2.66	2.13	1.36	8.76	4.07	5.63	8.05	1.42	5.53	3.85	0.8	5.27	0.06	0.25	0	0	0.2	0.25	0	0.27	0	0	0.18	0	0	0	0	0	0	0
TMEM206	1q32.3	5.34	4.96	9.91	3.31	4.54	5.09	3.42	2.4	1.56	9.06	4.6	5.83	8.78	1.83	7.23	4.08	0.8	6.21	0.08	0	0	0	0	0.25	0	0	0.19	0	0	0	0	0	0.43	0	0.2	0.19
NENF	1q32.3	7.97	9.93	12.83	11.92	7.5	5.34	5.89	1.87	0.97	16.92	6.9	7.04	11.95	2.44	8.09	7.71	0.6	9.23	0.16	0	0.19	0.33	0	0.25	0	0.27	0.19	0.3	0.35	0.2	0.24	0	0	0	0.2	0.19
ATF3	1q32.3	9.86	11.66	16.33	9.6	6.71	6.36	8.56	5.07	1.75	17.52	9.03	8.25	16.1	3.46	14.26	9.75	0.4	9.98	0.04	0	0.1	0	0	0	0	0	0	0.3	0	0	0	0	0	0.23	0	0.19
FAM71A	1q32.3	9.86	11.66	16.33	9.6	6.71	6.36	8.56	5.07	1.75	17.52	9.03	8.25	16.1	3.46	14.26	9.75	0.4	9.98	0.04	0	0	0	0	0	0	0	0.19	0	0.18	0	0	0.2	0	0	0	0
BATF3	1q32.3	6.9	7.44	11.66	4.97	5.33	3.82	4.75	2.4	0.78	12.39	6.02	6.64	12.68	1.83	9.36	5.67	0.4	7.72	0.03	0.25	0	0	0	0	0	0	0	0	0	0	0	0	0.21	0	0.2	0
NSL1	1q32.3	8.36	12.66	14.09	10.26	4.54	5.34	5.89	3.73	1.17	14.2	6.02	8.65	13.66	3.86	10	6.12	1.41	10.17	0.03	0	0	0	0	0	0	0	0.19	0	0	0	0	0.2	0	0.23	0	0
TATDN3	1q32.3	5.68	8.68	11.08	6.62	2.37	3.82	4.75	2.4	0.97	10.57	3.01	5.43	7.56	3.25	5.53	4.54	1.41	8.47	0.26	0.5	0.29	0.33	0	0	0.57	0	0.39	0.3	0.35	0.4	0.24	0	0.21	0	0.2	0.56
FLVCR1	1q32.3	12.69	17.37	18.85	11.26	10.06	10.69	10.27	2.93	2.14	22.05	11.33	14.49	20.73	5.08	18.09	14.97	3.02	13.37	0.08	0	0.1	0	0.2	0	0.19	0	0	0	0	0.2	0.24	0.2	0	0.23	0.2	0
VASH2	1q32.3	2.63	3.72	4.28	3.97	1.97	1.78	1.9	1.87	0.58	4.53	2.3	3.42	5.37	0.41	3.4	1.36	0.2	2.64	0.01	0	0.1	0	0	0	0	0	0	0	0	0	0	0	0	0	0	0
ANGEL2	1q32.3	2.63	3.72	4.28	3.97	1.97	1.78	1.9	1.87	0.58	4.53	2.3	3.42	5.37	0.41	3.4	1.36	0.2	2.64	0.16	0.25	0.1	0.33	0.39	0	0.38	0	0	0.3	0	0.2	0.24	0.2	0.21	0.23	0	0.19
RPS6KC1	1q32.3	1.37	2.23	2.24	1.66	1.18	0.76	0.57	0.27	0.39	2.42	0.53	1.01	2.2	0.81	1.06	1.59	0.8	1.88	0.05	0.25	0	0	0	0	0	0.27	0	0	0.18	0	0	0	0	0.23	0	0.19
PROX1	1q32.3	0.34	0	0.87	0.66	0.59	0	0	0	0	0.6	0	0	0.73	0	0.21	0.45	0	0.56	0	0	0	0	0	0	0	0	0	0	0	0	0	0	0	0	0	0
SMYD2	1q32.3	7.51	8.19	14.29	8.94	4.93	4.83	5.51	3.2	1.36	13.29	5.13	6.04	11.22	1.22	8.51	5.9	0.8	11.11	0.02	0	0	0	0	0	0	0	0	0.3	0	0	0	0	0	0	0.2	0
PTPN14	1q41	13.41	16.38	21.57	15.89	9.47	9.41	11.22	4	2.14	20.85	11.5	14.29	22.68	4.67	20	13.38	1.81	15.07	0.28	0.74	0.29	0.66	0.39	0.51	0	0	0.39	0.3	0	0.4	0	0.41	0	0	0.2	0.38
CENPF	1q41	19.13	27.54	27.99	24.5	15.58	12.47	15.97	8.27	5.25	23.26	21.95	22.54	29.51	7.11	25.53	19.05	6.44	20.53	0.26	0	0.1	0	0.2	0.25	0.38	0.27	0.19	0	0.35	0.8	0	0.2	0.43	0.68	0.2	0.19
KCNK2	1q41	1.65	2.23	3.3	2.32	0.59	1.02	0.76	0.53	0.78	3.02	1.59	1.41	2.93	0.2	0.85	1.36	0.6	3.39	0.03	0	0	0	0	0.25	0.19	0	0	0	0.18	0	0	0	0	0	0	0
KCTD3	1q41	8.45	9.68	14.29	10.26	7.5	6.11	5.7	3.47	1.56	14.2	8.14	8.05	13.66	2.64	9.79	7.26	0.4	9.04	0.02	0	0	0	0	0	0	0.27	0	0	0	0.2	0	0	0	0	0	0
USH2A	1q41	28.35	38.46	41.98	32.45	23.87	21.63	19.77	11.47	7.2	44.41	31.5	26.96	40.49	12.4	38.3	29.93	7.44	30.13	1.31	0.5	1.17	2.98	0.39	2.04	1.71	1.6	1.36	1.51	2.48	1.21	1.22	0.81	1.28	0.91	0.8	0.75
ESRRG	1q41	7.79	10.42	13.7	6.95	6.71	4.58	4.56	3.73	1.56	10.57	7.08	7.24	11.95	2.44	8.51	7.03	0.6	8.85	0.33	0.25	0.49	0.33	0	0.25	0.57	0.27	0.58	0.6	0.35	1.01	0	0.81	0	0.23	0.2	0.38
GPATCH2	1q41	4.73	3.72	7.97	4.3	3.16	3.82	2.47	1.33	0.78	6.04	5.13	5.03	7.07	1.63	8.09	4.08	0.4	4.52	0.04	0	0.1	0	0.2	0	0	0	0.19	0	0	0	0	0	0	0	0.2	0
SPATA17	1q41	9.63	11.66	17.2	8.94	7.69	5.6	8.56	4.53	1.36	11.18	9.56	10.46	16.1	3.46	11.06	9.07	1.01	12.62	0.08	0	0.19	0	0	0	0.38	0	0	0	0	0	0.24	0.2	0	0	0.4	0
RRP15	1q41	2.07	2.48	4.96	2.32	1.18	1.27	1.14	1.33	0.19	3.63	1.95	2.82	2.93	1.02	1.28	1.36	0	2.82	0.01	0	0	0	0	0	0	0.27	0	0	0	0	0	0	0	0	0	0
TGFB2	1q41	0.55	0.25	1.07	0.33	0.59	0	0	0.8	0	1.51	0.35	0.8	0.98	0.41	0.85	0	0.2	1.51	0.01	0	0	0	0	0	0	0	0	0	0	0	0	0	0.21	0	0	0
LYPLAL1	1q41	2.33	2.23	3.5	0.99	1.18	1.78	2.66	3.47	1.17	5.14	1.77	3.02	3.41	2.64	2.77	2.04	0.8	2.07	0.06	0	0.19	0	0	0.25	0	0	0	0	0.18	0	0	0	0.21	0	0	0
SLC30A10	1q41	0.08	0	0.19	0.33	0.2	0	0	0	0	0	0.18	0	0	0	0.21	0.23	0	0.19	0	0	0	0	0	0	0	0	0	0	0	0	0	0	0	0	0	0
EPRS	1q41	8.23	10.67	14.87	7.95	7.1	8.14	7.03	4	1.95	11.78	7.43	9.26	10	2.03	7.23	6.8	1.21	9.42	0.19	0.25	0.29	0.66	0.39	0.25	0	0	0	0	0	0.2	0	0	0.21	0	0.2	0.38
IARS2	1q41	4.61	5.71	6.8	4.64	4.34	2.54	3.04	2.13	1.75	9.37	2.48	5.03	7.07	1.83	5.53	4.76	0.6	5.08	0.08	0.5	0.29	0	0	0.25	0	0	0.19	0.3	0	0	0	0	0	0	0	0
RAB3GAP2	1q41	6.22	6.2	10.59	4.97	5.52	4.33	4.37	1.6	1.17	11.18	4.6	6.04	10.73	2.03	6.38	8.84	1.21	8.29	0.31	0	0.29	0.66	0	0	0.76	0.53	0.78	0	0.53	0	0.24	0.41	0.21	0.45	0.2	0
MARK1	1q41	7.61	10.67	12.44	9.27	6.31	3.82	5.13	2.93	2.33	12.69	7.26	6.64	14.15	3.05	8.72	7.94	1.01	8.66	0.04	0	0	0	0.2	0	0.19	0	0	0	0	0.2	0	0	0	0	0.2	0
C1orf115	1q41	4.33	7.2	7.29	3.97	4.54	2.04	3.99	2.4	0.78	8.16	3.89	3.42	7.32	0.61	5.74	4.76	0	4.52	0	0	0	0	0	0	0	0	0	0	0	0	0	0	0	0	0	0
HLX	1q41	8.74	8.44	13.41	7.95	6.11	5.6	6.84	5.6	1.95	14.8	10.27	10.87	16.1	3.66	8.94	9.07	2.21	8.47	0.04	0	0	0	0.2	0	0	0	0	0	0	0.2	0.24	0.2	0	0	0	0
DUSP10	1q41	7.49	11.17	11.56	8.94	6.9	7.38	5.13	2.67	1.95	12.08	6.73	7.44	10.73	2.85	10	5.9	1.21	10.17	0.05	0.25	0.19	0	0	0	0	0.27	0	0	0	0	0	0	0	0	0	0.19
HHIPL2	1q41	20.71	26.55	31.58	23.84	17.36	15.78	18.44	8.27	6.23	30.21	24.96	21.53	28.78	10.57	23.62	21.77	3.62	23.73	0.27	0.5	0.1	0.33	0.2	0	0.38	0	0	0.3	0.18	0.4	0.24	0.2	0	0.23	0.8	0.38
TAF1A	1q41	20.43	26.3	31.1	23.84	15.58	15.01	18.44	8.27	6.23	30.82	24.42	21.33	29.02	9.96	22.77	21.54	3.62	23.73	0.03	0	0	0	0	0	0	0.27	0	0	0	0.4	0	0	0	0	0	0
AIDA	1q41	1.04	0.74	2.43	0	0.2	0.51	1.14	0.27	0	3.02	0.35	1.01	1.95	0.61	1.06	0.68	0	1.88	0	0	0	0	0	0	0	0	0	0	0	0	0	0	0	0	0	0
BROX	1q41	7.52	8.19	13.9	6.29	4.93	6.11	4.37	5.6	1.56	8.76	7.61	6.24	12.93	3.05	9.36	7.94	1.01	8.66	0.06	0	0	0	0	0	0	0	0.39	0	0	0	0.24	0	0.21	0.23	0.2	0
FAM177B	1q41	7.48	8.19	13.8	6.29	4.93	6.11	4.37	5.6	1.56	8.46	7.43	6.24	12.93	2.85	9.36	7.94	1.01	8.66	0.03	0	0.1	0	0	0	0	0	0.19	0	0	0	0.24	0	0	0	0	0
DISP1	1q41	13.34	15.63	21.28	13.91	12.82	11.96	9.51	5.33	2.14	21.45	13.98	13.08	23.66	5.08	16.17	15.19	1.01	15.63	1.12	0.99	1.94	1.32	1.18	0.76	0.57	1.07	0.39	1.51	1.06	0.6	0.73	0.81	0.85	2.49	1.81	0.94
TLR5	1q41	9.85	14.39	14.19	8.28	7.89	5.85	7.79	4.53	2.33	14.2	11.15	10.66	16.34	3.66	11.91	10.66	1.61	9.6	0.18	0.25	0.29	0	0	0.25	0.38	0	0.19	0	0.18	0	0	0.41	0.21	0.45	0.2	0.19
SUSD4	1q41	1.12	0.5	1.94	1.32	0.59	0.51	0.95	0.53	0	4.53	1.42	0.2	1.71	0.61	1.91	1.81	0	0.94	0.04	0.25	0	0	0	0	0	0	0	0	0	0	0	0	0.21	0	0.2	0.19
CAPN2	1q41	14.06	19.35	23.42	15.89	12.23	11.7	9.7	5.33	2.33	26.28	13.98	13.68	24.39	4.47	14.47	14.74	1.41	13.56	1.11	1.49	1.17	1.32	1.78	1.27	1.71	1.6	0.39	1.21	1.06	0.6	1.71	0.2	1.06	0.45	1.01	0.75
TP53BP2	1q41	13.09	17.87	21.96	12.58	11.44	10.69	8.56	5.33	2.14	21.45	12.92	11.67	21.71	4.47	15.32	14.06	1.61	14.31	0.1	0	0.19	0.33	0	0	0	0	0	0	0.35	0.2	0	0.41	0.21	0	0	0
FBXO28	1q42.11	0.2	0.5	0.29	0.66	0	0.25	0.19	0	0	0.91	0	0	0.73	0.2	0	0	0	0.38	0	0	0	0	0	0	0	0	0	0	0	0	0	0	0	0	0	0
DEGS1	1q42.11	1.16	0.25	1.94	1.99	0.79	1.02	0.57	0.53	0.19	2.11	1.42	0.2	2.68	0.81	1.28	0.91	0	1.13	0.01	0	0	0	0	0	0	0	0	0.3	0	0	0	0	0	0	0	0
NVL	1q42.11	5.84	7.2	9.91	8.28	5.92	3.31	4.94	2.13	0.78	7.85	5.13	4.63	8.78	2.44	6.17	6.8	0.8	8.66	0.57	1.24	0.78	0.33	0.39	0.25	1.33	0	0.78	0	0	0.2	0.24	1.22	0.21	0.68	0.4	0.75
CNIH4	1q42.11	1.81	1.74	3.3	3.31	1.38	1.78	1.33	0.53	0.39	1.81	1.42	1.01	2.2	0.81	1.06	1.81	0.2	3.01	0.01	0	0	0	0	0	0	0	0	0	0.18	0	0	0	0	0	0	0
CNIH3	1q42.12	2.21	2.98	4.18	3.31	0.59	2.04	2.28	0.53	0.19	2.42	2.65	2.21	4.39	1.42	2.77	2.27	0	2.64	0.01	0	0	0	0	0	0	0	0	0	0	0	0	0	0	0.23	0	0
LBR	1q42.12	8.69	10.17	14.58	9.93	7.3	5.85	5.7	2.4	1.17	13.6	9.2	8.85	14.15	2.64	11.49	7.26	0.6	12.43	0.91	0.74	1.36	1.32	0.99	0.76	1.52	1.07	0.19	0.91	0.89	0.4	1.71	0.61	0.85	1.36	0.2	0.56
ENAH	1q42.12	2.2	2.73	2.62	2.98	1.78	2.29	0.95	1.07	0.39	3.63	2.3	3.02	2.2	1.02	3.83	2.72	0.2	1.88	0.08	0.25	0.19	0	0	0	0	0	0	0	0	0	0.24	0	0.21	0	0.2	0
SRP9	1q42.12	8.55	10.92	12.63	8.61	7.1	6.87	6.27	4.27	1.17	14.5	8.32	8.65	15.12	2.85	10.21	9.3	0.8	8.47	0	0	0	0	0	0	0	0	0	0	0	0	0	0	0	0	0	0
EPHX1	1q42.12	20.33	25.81	31.78	23.84	19.33	13.99	14.45	9.07	4.86	32.02	18.58	20.32	32.93	8.54	25.53	21.77	5.23	23.54	0.06	0.25	0	0	0	0	0.19	0	0.19	0	0.18	0	0	0	0	0.23	0	0
TMEM63A	1q42.12	20.35	25.81	31.88	23.84	19.33	13.99	14.45	9.07	4.86	32.33	18.58	20.32	32.93	8.54	25.53	21.77	5.43	23.35	0.09	0	0.19	0.33	0	0	0	0	0	0	0.18	0.4	0	0.2	0	0	0	0.19
LEFTY1	1q42.12	18.99	22.33	29.93	22.52	17.75	11.7	14.45	8.53	4.86	30.82	15.93	20.52	31.95	7.72	24.68	22	5.23	21.28	0.02	0	0	0	0.2	0	0	0	0	0	0	0	0	0	0	0	0	0
PYCR2	1q42.12	5.7	5.96	9.23	5.96	4.34	3.82	4.37	3.2	1.56	9.97	5.49	6.64	9.27	1.42	5.74	8.16	1.21	6.59	0.08	0	0.1	0	0.2	0	0.19	0	0	0	0	0	0	0.41	0.21	0	0.2	0
LEFTY2	1q42.12	4.57	4.71	6.9	3.97	3.55	2.8	3.8	2.67	1.17	6.65	4.96	6.44	7.07	0.81	5.32	6.58	0.6	5.27	0	0	0	0	0	0	0	0	0	0	0	0	0	0	0	0	0	0
H3F3A	1q42.12	0.03	0	0	0	0	0	0	0	0	0	0	0.2	0.24	0	0.21	0	0	0	0	0	0	0	0	0	0	0	0	0	0	0	0	0	0	0	0	0
ACBD3	1q42.12	7.58	8.44	12.73	8.28	3.16	4.07	6.84	2.67	0.58	7.85	6.9	9.05	12.93	2.64	11.7	8.16	0.6	8.29	0.02	0	0	0	0	0	0	0.27	0	0	0	0	0	0	0	0	0.2	0
MIXL1	1q42.12	0.52	0	1.07	0.66	0.39	1.02	0.38	0	0	0.91	0.71	0.4	0.49	0	0.21	0.23	0	0.38	0.03	0	0	0	0	0	0	0	0	0	0.35	0.2	0	0	0	0	0	0
LIN9	1q42.12	4.48	4.47	7.48	4.97	3.94	2.8	3.04	1.6	0.58	6.04	4.96	3.02	7.07	1.02	4.47	4.99	0.8	5.65	0	0	0	0	0	0	0	0	0	0	0	0	0	0	0	0	0	0
PARP1	1q42.12	14.18	17.12	20.99	14.57	11.05	12.72	11.03	8	3.5	22.05	14.16	13.68	22.2	5.49	16.6	17.46	2.82	14.88	0.04	0.25	0.1	0	0	0	0	0	0	0.3	0	0	0	0	0	0	0	0.19
C1orf95	1q42.12	0.13	0	0.19	0.33	0.2	0	0	0.27	0	0.3	0.18	0	0	0	0	0	0	0.56	0.01	0	0	0	0	0	0.19	0	0	0	0	0	0	0	0	0	0	0
ITPKB	1q42.12	9.34	12.9	14.09	9.93	6.31	6.11	6.65	3.2	1.17	20.54	9.73	9.46	12.93	2.64	11.49	7.03	1.01	11.86	0	0	0	0	0	0	0	0	0	0	0	0	0	0	0	0	0	0
PSEN2	1q42.13	10.06	10.67	16.72	13.25	8.88	7.12	6.65	4	1.95	19.64	9.73	12.27	14.88	3.25	11.49	9.3	2.82	13.75	0.71	0.25	0.58	0.66	0.2	0.51	0.38	0	0.58	1.81	1.06	0.6	1.46	0.81	1.06	0.23	2.01	0.75
ADCK3	1q42.13	14.66	17.62	22.74	15.89	13.41	8.4	11.03	7.2	4.67	22.66	15.4	15.09	18.78	5.89	22.34	14.06	3.62	16.95	0.37	0.25	0.78	0	0.2	0.51	0.57	0.27	0	0.6	0.53	0.2	0.24	0	0.43	0.23	0.6	0.38
CDC42BPA	1q42.13	20.32	25.06	30.9	24.17	16.57	16.29	13.88	9.87	5.25	29.91	21.06	21.13	33.9	8.94	27.45	20.18	4.43	21.47	0.16	0	0.19	0	0	0	0	0	0.19	0	0	0.2	0.24	0	0.21	0	0.6	0.56
JMJD4	1q42.13	10.43	15.63	15.16	12.25	7.5	5.6	8.75	4.8	3.11	17.22	9.38	13.48	12.2	6.1	13.19	9.75	3.02	9.04	0.1	0.5	0.1	0	0	0	0	0	0.19	0.3	0.18	0.2	0	0	0.21	0	0.2	0
SNAP47	1q42.13	10.43	15.63	15.16	12.25	7.5	5.6	8.75	4.8	3.11	17.22	9.38	13.48	12.2	6.1	13.19	9.75	3.02	9.04	0.01	0	0.1	0	0	0	0	0	0	0	0	0	0	0	0	0	0	0
PRSS38	1q42.13	8.37	11.41	13.61	10.93	5.92	4.33	6.65	2.93	1.75	14.2	7.43	7.85	10.98	4.67	10.64	8.62	0.6	7.91	0.17	0	0.19	0	0	0.25	0.57	0	0	0	0.18	0.4	0	0	0	0	0	0.56
WNT9A	1q42.13	3.99	6.45	5.83	4.3	2.17	1.27	1.33	3.2	1.75	6.95	2.83	3.22	3.66	1.22	4.89	4.54	1.21	4.52	0.06	0	0.29	0	0	0	0	0	0.58	0	0	0	0	0	0	0	0	0
WNT3A	1q42.13	0.4	0.5	0.49	0.33	0	0.25	0.19	0.27	0.19	0.91	0.71	0.6	0.49	0	0.21	0	0.2	0.94	0.13	0.25	0.19	0	0	0.25	0	0.27	0.39	0	0.18	0.2	0	0.2	0	0	0.2	0
ARF1	1q42.13	1.44	1.99	2.72	0.99	0.59	0.51	0.95	0.8	0.39	2.72	1.24	1.41	1.95	0.61	1.28	1.13	0.4	2.07	0	0	0	0	0	0	0	0	0	0	0	0	0	0	0	0	0	0
C1orf35	1q42.13	1.26	1.49	2.53	1.32	0.79	0.25	1.33	0.53	0.19	2.11	0.89	1.01	1.71	0.61	1.49	1.13	0.2	1.51	0.01	0	0	0	0	0.25	0	0	0	0	0	0	0	0	0	0	0	0
MRPL55	1q42.13	1.26	1.49	2.53	1.32	0.79	0.25	1.33	0.53	0.19	2.11	0.89	1.01	1.71	0.61	1.49	1.13	0.2	1.51	0.01	0	0	0	0	0	0	0	0	0	0	0	0	0	0	0.23	0	0
GUK1	1q42.13	1.26	1.49	2.53	1.32	0.79	0.25	1.33	0.53	0.19	2.11	0.89	1.01	1.71	0.61	1.49	1.13	0.2	1.51	0.07	0.25	0.1	0	0	0	0.19	0.27	0	0	0.35	0	0.24	0	0	0	0	0
HIST3H2A	1q42.13	5.94	7.44	10.5	8.61	5.13	2.54	3.42	2.93	0.97	11.78	5.84	5.63	7.8	2.44	4.89	4.76	0.4	6.21	0	0	0	0	0	0	0	0	0	0	0	0	0	0	0	0	0	0
HIST3H2BB	1q42.13	5.83	7.44	10.11	8.61	4.73	2.54	3.42	2.93	0.78	11.78	5.84	5.63	7.32	2.44	4.89	4.54	0.4	6.21	0.04	0	0	0	0	0.25	0	0	0	0	0	0	0	0	0	0	0.2	0.19
HIST3H3	1q42.13	6.23	7.94	10.98	8.94	5.33	2.54	3.42	2.93	1.17	11.78	6.02	6.04	8.29	2.64	5.11	4.99	0.6	7.16	0.19	0.25	0.19	0	0.39	0	0.38	0.8	0	0	0.18	0.4	0.24	0	0	0	0	0.38
TRIM11	1q42.13	3.47	4.22	5.93	5.96	3.35	1.02	1.71	1.87	0.58	7.25	2.83	4.63	4.63	2.24	2.55	2.72	0.2	4.33	0.01	0	0	0	0	0	0	0	0	0	0	0	0	0	0	0.23	0	0
TRIM17	1q42.13	5.94	7.44	10.5	8.61	5.13	2.54	3.42	2.93	0.97	11.78	5.84	5.63	7.8	2.44	4.89	4.76	0.4	6.21	0.07	0.25	0.29	0	0	0	0	0	0	0	0	0.2	0	0	0	0.45	0	0
RHOU	1q42.13	0.19	0	0.39	0	0.2	0	0	0.27	0	0.3	0.35	0.4	0	0	0.43	0.23	0	0.19	0.03	0.25	0.1	0	0	0	0	0	0	0	0	0	0	0	0	0	0	0
RAB4A	1q42.13	0.21	0	0.49	0.33	0.39	0	0	0.27	0	0	0.18	0.6	0.73	0	0.21	0.23	0	0.19	0.02	0	0.1	0	0	0	0.19	0	0	0	0	0	0	0	0	0	0	0
SPHAR	1q42.13	0.21	0	0.49	0.33	0.39	0	0	0.27	0	0	0.18	0.6	0.73	0	0.21	0.23	0	0.19	0	0	0	0	0	0	0	0	0	0	0	0	0	0	0	0	0	0
ACTA1	1q42.13	6.23	8.19	9.62	6.62	5.52	4.33	5.32	4.53	1.56	9.06	6.37	6.84	7.56	2.44	6.81	5.22	1.41	8.29	0.04	0.25	0	0	0	0	0	0	0	0	0	0	0	0	0	0	0.2	0
NUP133	1q42.13	11.52	12.41	17.78	13.91	10.85	8.91	9.89	6.93	3.5	14.5	13.27	14.49	17.56	5.28	13.19	9.07	3.22	13.37	0.04	0.25	0.1	0	0	0	0	0.27	0	0	0	0	0	0.2	0	0	0	0
ABCB10	1q42.13	8.27	10.92	12.63	11.92	6.9	6.87	5.89	3.73	1.95	13.29	8.67	8.85	12.93	4.06	7.87	6.58	2.21	11.11	0.32	0	0.58	0	0.39	0	0	0	0.58	0.6	0.35	0.2	0	0.2	0.43	0.68	0	0.56
TAF5L	1q42.13	17.02	19.85	27.31	20.53	14.6	14.76	11.6	7.2	2.53	24.47	17.35	15.49	28.78	7.52	22.13	16.33	3.22	19.96	0.04	0	0	0	0.2	0.25	0	0	0	0	0	0	0.24	0	0.21	0	0	0
URB2	1q42.13	17.02	19.85	27.31	20.53	14.6	14.76	11.6	7.2	2.53	24.47	17.35	15.49	28.78	7.52	22.13	16.33	3.22	19.96	0.09	0	0.1	0	0.2	0	0.19	0	0.19	0	0.18	0.2	0	0	0.21	0	0	0.19
GALNT2	1q42.13	14.68	17.37	24.3	21.19	11.64	11.45	9.13	5.6	4.47	24.77	15.93	12.07	24.15	7.93	17.02	13.83	2.62	15.82	0.02	0	0	0	0.2	0	0	0	0.19	0	0	0	0	0	0	0	0	0
COG2	1q42.2	17.79	21.84	29.64	16.56	14.79	13.49	15.02	8.53	3.5	23.26	19.29	17.3	29.51	6.1	22.98	18.14	3.22	17.51	0.05	0.25	0	0	0.2	0	0	0	0	0	0	0	0	0	0	0	0.4	0
AGT	1q42.2	18.91	22.83	31.2	16.89	16.37	15.27	15.78	8.53	3.7	24.47	20.53	17.91	30.98	7.11	23.83	17.91	3.82	19.59	0.44	0.74	0.29	0.33	0.79	0	0.19	0.8	0.97	0.3	0.53	0.2	0	0.2	0.64	0.68	0.4	0
CAPN9	1q42.2	17.09	19.11	27.02	18.87	16.96	13.23	12.74	7.73	4.47	24.77	18.05	16.7	27.32	6.91	19.36	16.1	3.42	18.64	1.3	1.74	1.26	1.32	1.18	2.04	2.47	1.33	1.36	0.3	1.59	1.21	0.98	0.61	0.43	0.91	1.81	1.51
C1orf198	1q42.2	0.61	0	1.36	0.99	0.59	1.02	0.76	0.8	0	1.51	0.35	0.2	1.22	0.41	0.21	0.23	0	0.94	0	0	0	0	0	0	0	0	0	0	0	0	0	0	0	0	0	0
TTC13	1q42.2	14.06	17.37	22.35	16.89	13.61	10.94	11.41	5.6	1.75	19.34	12.21	12.68	24.39	5.49	17.87	13.61	1.81	13.56	0.06	0.25	0.1	0.33	0	0	0	0	0	0	0	0	0	0	0.21	0	0	0.38
ARV1	1q42.2	5.48	6.7	9.04	8.61	4.54	4.07	3.99	1.87	0.97	5.44	4.07	3.02	12.2	1.63	8.51	5.22	0.6	6.03	0.14	0.25	0.1	0	0	0.51	0	0	0	0.6	0.35	0.4	0	0	0.21	0	0	0.19
FAM89A	1q42.2	4.62	5.46	7.68	7.28	2.96	3.31	3.42	1.87	0.78	5.14	3.36	2.21	9.76	1.42	7.66	4.08	0.2	5.46	0.01	0	0	0	0	0	0	0	0	0	0	0	0	0	0	0	0.2	0
C1orf131	1q42.2	11.34	14.14	18.37	11.59	10.45	5.85	9.32	5.33	1.75	16.01	10.97	10.87	19.02	4.67	13.62	10.66	1.81	12.43	0.02	0	0	0	0	0	0.19	0	0	0.3	0	0	0	0	0	0	0	0
GNPAT	1q42.2	11.34	14.14	18.37	11.59	10.45	5.85	9.32	5.33	1.75	16.01	10.97	10.87	19.02	4.67	13.62	10.66	1.81	12.43	0.35	0.25	0.58	0	0.2	0	0.19	0.8	0.39	0.91	0.35	0.2	0.73	0.2	0.64	0.45	0.2	0.38
EXOC8	1q42.2	0.48	0.25	0.58	0.66	0.59	0.25	1.14	0.53	0.39	0.6	0.53	0.2	0.98	0	0.64	0.23	0	0.94	0.11	0.25	0.1	0	0	0	0	0	0	0.3	0.18	0.4	0	0.41	0	0	0.4	0
EGLN1	1q42.2	0.09	0	0	0	0	0	0.19	0.27	0.19	0	0.18	0	0.49	0	0.21	0	0	0.19	0.08	0	0.1	0	0	0	0.19	0	0	0	0.18	0	0	0	0	0.23	0	0
TSNAX	1q42.2	0.16	0.25	0	0.66	0.2	0.25	0	0	0	0	0	0.2	0.49	0.41	0.21	0.23	0	0	0.02	0	0	0	0	0	0.19	0	0	0	0	0	0	0	0	0.23	0	0
DISC1	1q42.2	11.53	15.38	18.27	12.91	10.06	5.85	9.51	6.13	2.72	16.31	13.81	10.26	16.59	4.27	13.83	12.24	2.01	11.3	0.15	0	0	0.33	0.2	0	0	0.53	0.58	0.3	0	0.2	0	0.41	0.21	0	0.2	0
NTPCR	1q42.2	5.5	5.71	9.04	6.62	3.94	3.31	4.18	1.87	2.33	8.76	6.02	6.24	8.78	2.85	5.74	7.03	0.8	5.65	0	0	0	0	0	0	0	0	0	0	0	0	0	0	0	0	0	0
KCNK1	1q42.2	0.43	0.5	0.39	0.99	0.59	0.25	0	0	0	0.6	1.77	0.6	0.49	0.41	0.43	0.23	0	0.19	0.05	0	0.1	0	0	0	0	0	0	0	0	0.2	0.24	0.2	0	0	0	0
SLC35F3	1q42.2	0.95	0.25	1.36	1.66	0.2	0.25	0.19	0	0	3.02	0.71	0.6	1.22	0.81	0.21	2.04	0.2	1.13	0.03	0	0	0	0	0	0	0	0	0	0	0.2	0	0	0	0	0.2	0
TARBP1	1q42.2	23.39	28.04	35.18	24.17	22.88	18.32	18.25	10.13	8.95	31.72	22.3	22.54	38.05	13.21	32.34	23.13	8.25	23.54	0.13	0	0.1	0.33	0.2	0	0.19	0	0.39	0.3	0	0.2	0.49	0	0	0	0.2	0.19
IRF2BP2	1q42.3	2.9	2.23	5.05	2.98	2.56	2.04	1.33	1.07	0.39	3.63	2.83	1.61	5.37	1.63	3.4	2.49	0	4.9	0.01	0	0	0	0	0	0	0	0	0	0	0	0	0	0.21	0	0	0
TOMM20	1q42.3	0.33	0	0.68	0	0.2	0.25	0.19	0	0	0.91	0.35	0.2	0.24	0	0.43	0.45	0.2	0.75	0	0	0	0	0	0	0	0	0	0	0	0	0	0	0	0	0	0
ARID4B	1q42.3	11.61	15.14	19.53	13.25	10.26	6.62	6.46	4.8	3.7	15.71	12.21	12.47	18.29	4.67	10.85	11.34	2.01	14.69	0.01	0	0	0	0	0	0.19	0	0	0	0	0	0	0	0	0	0	0
GGPS1	1q42.3	0.85	0.5	1.85	0.66	0.99	1.02	0.19	0.53	0.19	0.91	1.06	0.4	1.46	0.81	0.21	0.23	0.4	0.94	0	0	0	0	0	0	0	0	0	0	0	0	0	0	0	0	0	0
TBCE	1q42.3	5.6	3.72	10.5	5.3	5.13	2.8	4.75	2.67	1.17	4.53	5.66	7.24	10.24	2.44	6.17	4.99	0.4	6.59	0.15	0.5	0.1	0	0.2	0.25	0	0	0	0.3	0.18	0.4	0.24	0	0.21	0.23	0.2	0
B3GALNT2	1q42.3	9.74	9.68	15.74	11.59	8.68	7.38	6.65	3.47	1.95	13.9	11.33	10.06	15.12	4.88	12.98	8.39	0.6	12.43	0.09	0	0.19	0.33	0	0.25	0.19	0.27	0	0	0.18	0	0	0	0	0.23	0.2	0
GNG4	1q42.3	9.4	11.91	15.65	11.92	8.68	5.85	7.41	3.2	1.17	14.8	9.38	11.07	16.59	3.46	11.7	8.84	1.01	8.85	0	0	0	0	0	0	0	0	0	0	0	0	0	0	0	0	0	0
LYST	1q42.3	15.28	18.61	27.31	18.21	15.98	11.7	12.36	5.07	3.31	18.43	15.04	15.9	24.15	6.91	19.15	13.38	2.62	17.51	0.26	0	0.19	0.33	0.59	0.25	0.38	0.27	0.39	0	0.18	0.6	0.73	0.61	0	0	0	0.56
NID1	1q42.3	16.76	19.6	26.63	18.87	12.43	13.49	12.93	6.93	5.45	28.7	18.58	17.71	28.78	6.1	19.57	15.87	3.02	17.14	0.6	0.99	0.68	0.66	0.59	0.76	0.19	0.27	0.39	0.6	0.18	1.01	1.46	0.2	0.64	1.81	0.2	0.56
GPR137B	1q42.3	12.35	13.15	19.83	11.92	12.03	8.4	10.46	5.6	3.89	20.24	11.15	13.08	20.24	4.88	15.74	10.43	3.62	16.38	0.1	0	0.29	0.33	0	0	0	0	0	0	0	0	0	0	0.21	0	0	0.19
ERO1LB	1q42.3	17.61	22.33	24.98	19.87	17.75	11.7	16.92	6.93	6.23	27.49	18.05	18.11	27.07	6.91	21.06	17.23	7.65	20.15	0.04	0	0	0	0	0	0.19	0	0.19	0	0	0	0	0.41	0	0	0	0
EDARADD	1q42.3	9.82	11.17	17.3	12.91	9.27	8.14	5.89	3.73	2.53	15.11	9.73	9.86	17.07	3.05	9.15	10.43	1.21	10.92	0.09	0	0.1	0	0	0.25	0	0	0.19	0	0.18	0.2	0	0	0	0	0.2	0.19
LGALS8	1q43	24.38	29.53	34.79	31.46	24.85	17.81	19.77	11.2	9.73	32.02	26.73	26.16	36.1	11.38	30.64	25.4	10.87	26.55	0.09	0.25	0	0	0.2	0	0	0	0.19	0.3	0	0.4	0	0.2	0	0.23	0	0.19
HEATR1	1q43	26.22	31.51	36.73	33.77	25.64	19.34	21.86	12	10.31	33.84	29.38	28.57	37.56	14.23	32.34	26.76	13.28	27.68	0.11	0.5	0.19	0	0.2	0	0	0	0	0	0.18	0.2	0	0	0	0	0	0.38
ACTN2	1q43	14.74	17.87	23.32	18.54	13.61	11.2	10.46	6.13	3.7	24.77	14.87	15.09	27.07	5.08	16.81	14.97	2.01	14.69	0.27	0.25	0.29	0.66	0.2	0	0.19	1.33	0.19	0.6	0	0.2	0	0.81	0.21	0	0.2	0.19
MTR	1q43	18	22.83	27.41	23.18	14.99	14.5	12.74	7.2	4.47	30.51	21.59	18.91	31.22	8.94	20.43	17.01	2.62	17.89	0.51	0.25	0.39	1.32	0.59	0.51	0.95	1.07	0.58	0.3	0.71	0.2	0.24	0.61	0.21	0.45	0.6	0.19
ZP4	1q43	1.25	1.24	3.01	1.99	0.79	0.76	0.76	0	0	2.42	1.42	1.41	2.44	0.41	0.64	0.68	0.2	2.26	0.59	0.25	0.68	0.66	0.39	0.76	0.57	1.33	0.19	0.91	0.35	0.6	0.73	0.2	0.43	0.45	0.8	0.38
CHRM3	1q43	0.41	0.25	1.17	0	0.2	0.51	0.38	0	0	0.91	0.53	0.4	0.49	0	0.21	0	0	0.94	0	0	0	0	0	0	0	0	0	0	0	0	0	0	0	0	0	0
FMN2	1q43	15.01	15.63	25.95	17.22	11.24	7.89	12.36	7.2	4.28	21.45	13.27	17.91	27.07	6.1	16.6	12.47	2.41	15.63	0.09	0	0.29	0	0	0	0.19	0.27	0	0	0	0	0	0.2	0	0	0.4	0.19
GREM2	1q43	0.01	0	0	0	0	0	0	0	0	0	0	0	0	0	0	0	0	0	0	0	0	0	0	0	0	0	0	0	0	0	0	0	0	0	0	0
RGS7	1q43	6.55	7.2	11.56	6.95	3.94	4.83	4.56	2.67	1.56	10.27	8.14	7.44	13.9	2.85	7.87	7.03	0.4	6.78	0.03	0	0.1	0	0	0	0	0	0	0	0	0	0.24	0	0	0	0.2	0
FH	1q43	5.97	8.44	10.79	5.96	3.16	3.31	4.37	2.67	2.14	8.46	4.96	7.24	11.71	2.24	6.17	5.44	1.01	5.84	0.37	0.5	0.78	0	0.59	0	0	0.27	0.19	0	0.35	0.6	0.24	0.41	0	0.23	0.6	0
KMO	1q43	8.13	9.93	13.31	8.28	5.72	4.33	5.7	4.8	2.14	12.08	7.61	9.46	15.37	2.64	10.43	7.03	1.01	8.85	0.02	0	0	0	0	0	0.19	0	0	0	0	0	0	0	0	0	0	0
OPN3	1q43	7.69	7.69	12.93	5.96	6.71	5.85	5.7	3.73	1.36	12.08	5.84	7.85	15.61	1.83	9.79	6.8	0.2	7.72	0.04	0	0.1	0	0	0	0	0	0	0.3	0.18	0	0	0	0	0	0.2	0
CHML	1q43	7.64	7.69	12.93	5.96	6.71	5.85	5.7	3.73	1.36	11.78	5.84	7.65	15.61	1.83	9.57	6.8	0.2	7.72	0.2	0	0.1	0	0	0	1.14	0.27	0	0.3	0.53	0.2	0.24	0.2	0	0.45	0	0.19
EXO1	1q43	15.37	15.88	24.59	15.89	14.4	10.18	11.79	6.67	4.09	19.94	15.93	16.1	27.32	3.66	20	15.87	1.01	16.38	0.11	0.25	0.19	0	0	0.25	0.19	0	0	0.3	0	0.2	0	0	0.21	0	0.4	0
MAP1LC3C	1q43	0.94	0.5	2.33	0.99	0.39	0	0.57	0	0.19	2.11	0.53	0.2	2.2	0	0.85	1.81	0.2	1.51	0.02	0	0.1	0	0	0	0	0	0	0	0	0	0	0	0	0	0	0
SDCCAG8	1q43	12.39	16.38	18.56	12.58	9.07	8.91	10.46	4.8	2.53	16.31	13.1	14.08	22.44	3.05	16.6	14.51	2.62	11.68	0.03	0	0	0	0.2	0	0.19	0	0	0	0	0	0	0	0	0	0	0.19
AKT3	1q43	2.11	2.48	4.28	0.99	2.37	1.02	1.14	1.33	0.39	4.83	1.77	1.81	4.39	0.81	0.85	1.59	0	2.26	0.07	0	0.19	0	0	0	0	0	0	0.3	0	0.2	0	0	0	0	0	0.19
C1orf100	1q44	0.88	0.99	0.58	0.66	0.2	0.25	1.14	0.8	0.19	1.21	1.42	1.21	0.98	0.2	1.28	0.45	0	1.69	0.07	0	0.19	0	0	0	0	0	0	0	0.18	0.4	0	0.2	0.21	0	0	0
ADSS	1q44	2.42	2.23	3.3	1.99	0.79	2.54	0.95	1.33	0.19	5.14	3.54	3.02	3.41	0.2	2.98	1.13	0.8	3.01	0	0	0	0	0	0	0	0	0	0	0	0	0	0	0	0	0	0
C1orf101	1q44	9.49	8.44	16.72	13.25	8.09	5.09	5.89	5.33	2.72	14.8	9.73	8.65	14.88	2.03	13.19	9.07	1.41	10.36	0.18	0.25	0.1	0	0.39	0.76	0	0	0	0	0	0.4	0.24	0	0	0.23	0	0.38
HNRNPU	1q44	1.13	1.24	2.82	1.32	1.38	1.02	0.19	0.53	0.39	3.02	0.89	0.4	1.46	0.2	0.85	0.45	0.2	2.07	0.06	0	0.19	0	0	0	0.38	0	0	0	0	0	0	0.2	0	0	0	0
EFCAB2	1q44	5.66	3.47	8.36	5.63	5.52	5.34	3.61	2.93	2.72	9.97	6.19	7.44	9.51	2.24	5.11	2.95	1.81	6.97	0.02	0	0	0	0	0	0	0	0	0	0	0	0	0.41	0	0	0	0
SMYD3	1q44	8.33	6.7	15.16	9.93	6.51	7.38	5.13	2.93	1.56	15.11	8.67	7.44	16.59	1.63	9.15	7.71	1.41	8.29	0.08	0	0	0	0.2	0	0.19	0	0	0	0	0	0.73	0	0	0	0	0.19
CNST	1q44	3.29	2.98	5.83	2.98	3.35	2.54	1.71	0.8	0.19	4.83	4.25	4.43	7.56	0.61	2.13	2.27	0.6	3.77	0	0	0	0	0	0	0	0	0	0	0	0	0	0	0	0	0	0
SCCPDH	1q44	9.58	10.17	15.55	10.93	5.52	6.62	5.89	5.07	2.92	17.22	8.5	10.66	16.83	1.83	12.98	9.52	1.81	11.3	0.07	0	0	0.33	0.2	0	0.19	0	0.19	0	0	0.2	0	0	0	0	0	0.19
TFB2M	1q44	12.64	14.64	21.09	13.58	9.86	8.91	9.7	3.73	3.89	14.8	15.22	13.28	21.95	3.86	16.6	14.29	1.41	13.56	0.03	0	0	0	0.2	0	0	0	0	0	0	0	0	0	0	0	0.2	0
ZNF670	1q44	2.08	2.23	3.69	2.32	1.18	1.27	1.14	1.07	0.19	1.81	2.65	2.62	6.83	0.41	3.62	0.23	0	3.77	0.04	0.25	0.1	0	0	0	0	0	0.19	0	0	0	0	0.2	0	0	0	0
ZNF669	1q44	1.36	1.49	2.43	0.99	0.59	0.51	0.38	0.8	0	1.51	1.59	2.01	4.39	0.41	2.55	0	0	3.01	0.05	0.25	0	0	0	0	0	0	0	0	0	0	0	0	0	0	0.2	0.19
ZNF124	1q44	7.38	9.93	12.83	6.62	5.13	4.83	4.94	2.4	1.36	10.27	6.02	7.24	16.1	1.83	9.57	5.44	1.21	9.79	0.08	0	0.1	0	0	0	0.19	0	0.19	0.3	0	0.2	0	0	0.21	0	0	0
ZNF496	1q44	4.91	6.45	6.9	5.3	3.75	3.31	4.75	1.33	1.56	7.55	4.25	5.83	9.76	1.83	4.26	5.67	0.6	4.52	0.01	0	0	0	0	0	0	0	0	0	0	0	0	0	0.21	0	0	0
NLRP3	1q44	20.32	26.55	31.2	24.17	15.58	15.01	15.4	8.53	5.06	32.93	23.01	22.94	35.12	6.71	22.77	17.01	3.42	21.47	0.35	0.99	0.29	0.33	0.2	0.25	0.19	0.27	0.58	0.3	0.18	0.2	0	0.2	0.21	0.45	0	0.94
OR2B11	1q44	20.32	26.55	31.2	24.17	15.58	15.01	15.4	8.53	5.06	32.93	23.01	22.94	35.12	6.71	22.77	17.01	3.42	21.47	0.02	0	0	0	0	0	0.19	0	0	0	0	0	0	0	0	0	0.2	0
OR2C3	1q44	5.8	7.2	9.82	6.62	5.13	3.56	3.99	3.47	2.53	9.06	4.42	7.04	8.29	1.02	6.17	4.76	0.2	5.84	0.12	0	0.29	0	0.2	0.51	0.19	0.27	0	0	0.18	0	0.24	0	0	0.23	0	0
OR2G2	1q44	11.19	14.39	17.2	11.59	8.68	7.38	9.7	4.53	1.95	16.62	9.56	13.08	21.95	2.03	20.21	11.34	0.6	11.11	0.04	0	0	0	0	0.25	0.19	0	0	0	0	0	0	0	0	0	0.2	0.19
OR2G3	1q44	6.74	8.19	10.98	5.3	4.73	4.33	5.13	2.67	1.75	12.39	5.49	7.85	10.49	1.02	9.36	7.94	0	8.47	0.03	0	0.19	0	0	0	0	0	0	0	0	0	0	0	0	0	0	0
OR11L1	1q44	16.86	19.35	26.72	21.52	13.81	11.7	13.5	7.2	6.03	22.05	18.76	20.93	28.54	5.28	18.09	14.29	3.82	19.96	0.02	0	0	0	0.2	0	0	0	0	0	0	0	0	0	0	0	0.2	0
OR13G1	1q44	16.76	19.6	25.17	22.19	13.61	10.18	14.64	8.27	3.5	23.57	17.88	20.72	29.51	5.89	22.55	16.1	4.02	17.14	0.02	0	0.1	0	0	0	0	0	0	0	0	0	0	0	0	0	0.2	0
OR14A16	1q44	12.52	10.42	20.21	16.89	10.85	9.41	11.03	4.8	4.47	14.8	15.22	15.49	22.93	4.06	12.13	9.75	3.22	16.01	0.01	0	0	0	0	0	0	0.27	0	0	0	0	0	0	0	0	0	0
OR14C36	1q44	18.94	21.84	29.35	27.48	11.64	14.25	15.21	5.87	7	27.49	20.18	20.52	25.61	5.49	26.17	21.54	4.83	20.53	0.02	0.25	0	0	0	0	0	0	0.19	0	0	0	0	0	0	0	0	0
OR14I1	1q44	8.06	7.69	13.12	13.25	9.47	5.09	7.03	3.47	2.92	12.99	6.19	7.44	12.68	2.24	8.09	6.58	2.01	10.73	0.02	0	0	0	0	0	0	0.27	0	0.3	0	0	0	0	0	0	0	0
OR2AK2	1q44	14.98	19.85	23.62	16.56	10.26	9.92	10.84	7.47	3.89	23.57	14.87	15.9	27.07	4.27	21.06	14.06	2.82	14.88	0.04	0	0.1	0.33	0	0	0	0.27	0	0	0.18	0	0	0	0	0	0	0
OR2G6	1q44	4.59	4.47	8.75	7.28	3.35	1.78	1.71	1.87	0.78	7.25	3.72	4.23	10.98	0.41	5.96	3.63	0	5.65	0.2	0	0.1	0.33	0	0.25	0.19	0.27	0	0.6	0.18	0.4	0	0.41	0.21	0	0.2	0.19
OR2L13	1q44	10.22	12.41	18.85	9.93	7.1	6.62	8.37	5.33	2.33	19.94	9.38	10.06	17.56	1.83	12.77	9.98	2.01	12.81	0.05	0	0.19	0	0	0	0	0	0	0.3	0.18	0	0	0	0.21	0	0	0
OR2L2	1q44	7.37	8.93	13.31	7.28	4.54	5.34	5.51	4.27	1.75	15.71	7.79	5.83	11.46	1.02	7.87	7.48	1.41	9.6	0.03	0	0	0	0	0	0	0	0	0	0	0	0.24	0	0.21	0	0	0.19
OR2L3	1q44	9.53	10.92	17.49	9.6	6.11	5.85	8.17	4.8	2.33	19.34	9.38	9.46	14.39	1.42	12.13	9.75	1.81	12.24	0.17	0.25	0	0.33	0.39	0	0	0	0	0.3	0.18	0	0.49	0	0.21	0.23	0.4	0.19
OR2L8	1q44	14.98	19.85	23.62	16.56	10.26	9.92	10.84	7.47	3.89	23.57	14.87	15.9	27.07	4.27	21.06	14.06	2.82	14.88	0.02	0	0.1	0	0	0	0	0	0	0	0	0	0	0	0	0	0	0
OR2M2	1q44	4.94	6.2	10.88	8.94	4.14	1.53	1.71	1.33	0.58	7.85	3.54	3.22	7.07	0.81	5.11	3.85	0.6	6.97	0.02	0	0	0	0	0	0	0	0	0	0	0.2	0	0	0.21	0	0	0
OR2M3	1q44	6.07	8.19	10.3	6.95	4.14	4.83	3.23	1.6	0.58	14.2	4.78	5.03	10	0.61	7.87	5.44	0.2	7.53	0	0	0	0	0	0	0	0	0	0	0	0	0	0	0	0	0	0
OR2M4	1q44	4.09	5.46	8.36	4.97	3.16	1.02	2.47	1.33	0.97	8.76	4.42	2.82	7.07	0.61	5.53	2.95	0	5.08	0.03	0	0	0	0	0	0	0	0	0	0	0.2	0	0	0	0	0	0.19
OR2M5	1q44	4.99	4.96	9.43	4.97	3.16	2.8	4.56	1.87	0.97	10.27	4.42	5.63	6.1	0.61	7.87	5.22	0.4	7.16	0.02	0	0	0	0	0	0	0	0.19	0	0	0	0	0	0	0	0	0
OR2M7	1q44	18.7	20.1	29.64	24.5	13.41	13.74	15.4	6.93	7	27.49	19.47	19.11	27.56	6.5	25.11	21.09	4.23	19.02	0.03	0.25	0	0	0	0	0	0.27	0	0	0	0	0	0	0	0	0	0
OR2T10	1q44	3.2	3.23	5.44	4.97	4.34	2.8	0.95	2.4	0.39	3.93	1.42	2.62	6.83	2.03	2.13	2.49	1.01	4.33	0.03	0	0	0	0	0	0	0	0.19	0	0	0	0.24	0	0	0	0.2	0
OR2T11	1q44	4.55	5.71	7.39	6.29	6.31	3.31	3.04	4.27	1.75	9.06	2.83	3.82	7.07	0.81	2.98	5.67	1.41	5.84	0.04	0	0.1	0	0.2	0	0	0	0	0	0	0	0.24	0	0	0.23	0	0
OR2T12	1q44	13.24	15.88	21.57	17.88	10.65	8.91	9.89	5.07	4.28	21.75	13.1	10.66	20.24	4.88	15.53	15.19	1.81	14.69	0	0	0	0	0	0	0	0	0	0	0	0	0	0	0	0	0	0
OR2T1	1q44	8.38	10.67	12.24	9.27	6.11	7.38	5.89	3.2	1.36	15.11	7.96	10.46	17.56	0.81	11.7	8.84	1.21	8.66	0.04	0	0	0	0	0	0	0	0	0	0	0	0.24	0	0	0.45	0	0
OR2T27	1q44	9.78	11.17	15.84	15.23	10.85	5.6	8.37	5.87	3.89	16.31	7.79	8.65	15.12	2.64	9.79	9.75	2.21	12.43	0.02	0.25	0	0	0	0	0	0	0	0	0	0	0	0	0	0.23	0	0
OR2T2	1q44	9.66	11.41	14.97	10.93	7.3	8.4	5.51	4	1.56	17.52	9.2	10.87	21.22	1.02	12.34	10.43	1.21	10.36	0	0	0	0	0	0	0	0	0	0	0	0	0	0	0	0	0	0
OR2T33	1q44	10.43	12.41	18.08	14.24	8.68	5.85	6.84	4.27	2.53	17.82	10.27	8.45	18.78	3.46	12.77	10.43	1.01	11.68	0.03	0	0	0	0	0.51	0	0	0	0	0	0	0	0.2	0	0	0	0
OR2T34	1q44	2.74	2.73	4.96	4.3	2.17	2.29	0.76	2.13	0.39	3.32	1.42	2.01	6.59	1.83	1.91	2.49	0.6	4.14	0	0	0	0	0	0	0	0	0	0	0	0	0	0	0	0	0	0
OR2T3	1q44	4.82	4.47	9.33	7.62	3.35	2.04	2.09	2.13	0.78	7.25	4.07	4.83	11.22	0.41	6.17	4.08	0	5.84	0	0	0	0	0	0	0	0	0	0	0	0	0	0	0	0	0	0
OR2T4	1q44	16.9	19.11	27.5	22.52	10.26	12.98	13.69	5.6	6.42	23.26	16.99	17.91	23.41	4.47	23.83	19.73	3.82	17.7	0.04	0	0	0	0.2	0.25	0.19	0	0.19	0	0	0	0	0	0	0	0	0
OR2T5	1q44	4.82	4.47	9.33	7.62	3.35	2.04	2.09	2.13	0.78	7.25	4.07	4.83	11.22	0.41	6.17	4.08	0	5.84	0	0	0	0	0	0	0	0	0	0	0	0	0	0	0	0	0	0
OR2T6	1q44	14.7	17.37	22.64	20.2	7.3	9.41	12.36	4.27	4.28	24.17	16.64	18.11	21.46	3.86	21.7	16.78	2.82	16.01	0.07	0	0	0	0.2	0	0.19	0.27	0.19	0	0	0.2	0	0.2	0	0	0.2	0
OR2T8	1q44	23.48	29.78	35.37	27.48	16.96	16.29	17.49	9.87	7.2	37.76	24.78	24.35	40.24	7.72	31.06	23.81	5.83	25.8	0.01	0	0	0	0	0	0	0	0	0	0	0	0	0	0.21	0	0	0
OR2W3	1q44	20.67	25.06	30.9	21.85	16.77	14.76	15.21	7.73	6.42	33.84	23.54	22.33	37.8	6.1	25.53	22	5.23	22.79	0.14	0.5	0.19	0.33	0.2	0.25	0.19	0.27	0	0.3	0	0	0	0.41	0	0	0	0
OR6F1	1q44	16.76	19.6	25.17	22.19	13.61	10.18	14.64	8.27	3.5	23.57	17.88	20.72	29.51	5.89	22.55	16.1	4.02	17.14	0.03	0	0	0	0	0	0	0	0	0	0	0	0	0	0	0	0.2	0
PGBD2	1q44	1.51	1.99	2.53	0.99	0.59	1.02	0.95	0.8	0.39	4.53	1.24	0.6	1.71	0.2	2.98	2.04	0.2	1.69	0.06	0	0	0	0.39	0	0	0	0	0	0.18	0	0.49	0	0.21	0	0	0
SH3BP5L	1q44	8.27	10.67	13.61	13.25	3.94	5.6	7.98	3.2	2.14	15.41	7.08	9.26	16.34	3.25	8.3	7.94	1.21	9.04	0.07	0	0.1	0.33	0	0.25	0	0	0.19	0	0	0	0	0	0.43	0	0.2	0
TRIM58	1q44	20.51	25.06	30.03	22.52	17.36	15.01	14.45	6.93	6.81	30.51	23.89	23.34	35.85	6.5	25.53	19.95	6.04	23.16	0.13	0	0.1	0.99	0	0	0.19	0	0	0.3	0.35	0	0.73	0	0	0	0	0
ZNF692	1q44	8.27	10.67	13.61	13.25	3.94	5.6	7.98	3.2	2.14	15.41	7.08	9.26	16.34	3.25	8.3	7.94	1.21	9.04	0.07	0	0.19	0	0	0	0	0	0	0	0	0	0	0.41	0	0	0	0.19
CKS1B	1	12.07	14.89	19.24	11.59	12.03	7.63	9.13	4	2.53	21.15	11.15	13.48	15.61	3.25	16.81	11.56	3.42	15.44	0	0	0	0	0	0	0	0	0	0	0	0	0	0	0	0	0	0
KIAA1804	1	15.04	17.12	24.68	17.88	15.19	9.41	12.93	6.93	3.7	23.57	17.35	14.29	20.98	7.93	19.36	17.69	0.8	12.99	0.22	0	0.1	0	0.39	0.25	0.19	0	0	0	1.06	0	0.24	0.41	0.43	0.68	0.4	0
ACP1	2p25.3	7.23	9.43	6.9	7.28	7.69	6.87	7.22	3.47	1.75	5.14	5.84	9.86	16.34	2.44	7.66	9.07	1.21	4.71	0.01	0	0	0	0	0	0	0	0	0	0	0	0	0.2	0	0	0	0
TMEM18	2p25.3	0.18	0	0.29	0.33	0.2	0	0.19	0.27	0	0	0.18	0.6	0.24	0	0.21	0.45	0	0	0.07	0.25	0.1	0	0	0	0.19	0	0	0	0	0	0.24	0	0	0	0	0.19
TPO	2p25.3	15.99	17.12	16.91	19.21	18.74	15.01	12.36	9.07	7.39	11.78	16.64	19.52	27.56	7.93	15.96	17.23	6.64	14.69	0.46	0	0.49	0.33	0	0.51	0.57	0	0.58	0.3	0.71	0.6	0	0.41	0.64	0.68	0.6	0.94
TSSC1	2p25.3	2.14	2.73	2.82	2.98	2.17	1.53	0.95	0.53	0.39	1.21	1.59	2.62	5.37	0.61	1.28	2.95	0	2.64	0.06	0	0.39	0	0	0	0	0	0.19	0	0	0	0	0	0	0	0.2	0
ADI1	2p25.3	4.78	5.46	5.73	5.96	5.33	3.05	2.85	1.87	1.36	2.42	4.6	7.44	9.51	0.61	4.89	7.26	0.8	4.52	0.19	0.25	0.1	0	0.2	0.51	0	0	0.39	0	0.53	0.4	0	0	0	0	0	0.38
RNASEH1	2p25.3	7.21	8.44	8.84	9.6	8.48	5.09	5.13	1.87	1.75	6.95	5.84	8.85	14.88	0.61	6.17	9.07	0.6	6.78	0.02	0	0	0	0.2	0.25	0	0	0	0	0	0	0	0	0	0	0	0
RPS7	2p25.3	8.26	9.18	9.43	11.59	9.86	6.36	6.08	2.13	2.53	8.46	7.08	9.26	17.8	1.02	7.23	10.88	0.6	8.1	0.02	0	0	0	0	0	0	0	0	0	0.18	0	0	0	0	0	0	0.19
COLEC11	2p25.3	6.43	6.45	7.68	7.62	6.71	4.07	6.46	2.4	2.53	5.44	6.55	5.43	15.12	1.63	4.47	8.39	1.61	5.46	0.18	0.25	0.1	0	0.2	0.25	0	0.27	0.19	0	0.35	0	0.24	0	0.43	0.23	0.2	0.38
SOX11	2p25.2	0	0	0	0	0	0	0	0	0	0	0	0	0	0	0	0	0	0	0	0	0	0	0	0	0	0	0	0	0	0	0	0	0	0	0	0
RSAD2	2p25.2	1.99	1.24	3.01	1.99	3.35	2.04	1.71	0.8	0.58	0.6	1.59	1.21	5.85	0.61	0.43	2.27	0.8	0.94	0.38	0.5	0.39	0	0.39	0.51	0.57	0.27	0.39	0.91	0	0.4	0.24	0.2	0	0.45	0.6	0.38
RNF144A	2p25.2	7.43	10.67	8.26	9.6	8.48	6.62	7.03	2.13	1.36	7.25	5.49	11.47	16.1	1.02	7.87	9.07	0.4	5.27	0.02	0	0	0	0	0	0	0	0	0	0	0	0	0	0.43	0	0	0
ID2	2p25.1	0.13	0	0	0.33	0.39	0	0.19	0	0.19	0	0.35	0	0	0	0.21	0.23	0	0.38	0.02	0	0	0	0	0	0.19	0	0	0.3	0	0	0	0	0	0	0	0
MBOAT2	2p25.1	1.73	2.23	2.24	2.65	1.78	1.78	0.38	0.27	0	0.91	2.83	2.21	3.66	0.41	1.28	2.95	0.4	0.56	0.05	0	0.19	0	0	0.25	0	0	0.19	0	0	0	0	0	0	0	0	0
ASAP2	2p25.1	12.16	14.89	13.12	14.24	14.6	7.38	9.7	5.87	2.72	9.97	12.92	17.51	25.85	2.44	12.77	14.29	2.01	10.73	0.08	0	0.19	0	0	0.25	0	0	0	0	0	0.2	0	0.2	0.21	0.23	0	0.19
ITGB1BP1	2p25.1	10.86	12.16	12.24	13.25	14.99	7.89	9.51	5.07	2.33	6.04	12.21	13.68	22.2	2.03	11.7	12.24	1.81	9.23	0.02	0	0	0.33	0	0.25	0	0	0	0	0	0	0	0	0	0	0	0
CPSF3	2p25.1	10.88	12.16	12.24	13.25	12.23	9.41	10.08	5.07	2.92	6.04	13.27	14.89	20.49	1.63	9.36	14.29	2.41	10.55	0.1	0.25	0	0	0	0	0	0.53	0.19	0	0.18	0	0	0	0	0.23	0.4	0.19
ADAM17	2p25.1	6.75	7.44	8.07	7.95	6.71	5.34	6.27	4	2.14	3.02	7.79	9.86	13.17	0.81	5.32	7.71	1.21	6.03	0.04	0	0	0	0	0	0	0	0	0	0.18	0	0	0	0.21	0.23	0.2	0
YWHAQ	2p25.1	1.39	2.73	2.04	1.66	0.99	2.29	1.33	0.27	0.39	0.91	0.89	1.81	3.41	0.41	0.21	1.13	0.4	0.94	0	0	0	0	0	0	0	0	0	0	0	0	0	0	0	0	0	0
TAF1B	2p25.1	10.18	9.68	10.5	15.23	8.88	9.92	10.27	4	2.33	8.46	9.73	13.88	21.95	2.44	11.91	12.02	1.81	7.72	0.02	0	0	0.33	0	0	0	0	0	0	0	0	0	0	0	0	0	0
KLF11	2p25.1	3.67	4.22	4.18	4.3	4.54	2.54	2.85	1.07	0.97	2.42	4.25	5.23	8.05	0.41	4.04	2.95	0.6	3.01	0.13	0.25	0.1	0.33	0	0	0	0.27	0.19	0.3	0.35	0.2	0.24	0	0	0.23	0.2	0.19
CYS1	2p25.1	3.67	4.22	4.18	4.3	4.54	2.54	2.85	1.07	0.97	2.42	4.25	5.23	8.05	0.41	4.04	2.95	0.6	3.01	0.02	0.25	0	0	0	0	0	0	0	0	0	0	0	0	0	0	0	0.19
RRM2	2p25.1	1.54	1.99	1.36	2.32	1.38	1.27	1.52	0.27	0.39	0.91	0.18	1.81	4.63	0	2.34	0.91	0.6	1.88	0.12	0	0.19	0.33	0.2	0.25	0	0.27	0	0	0	0.6	0	0	0	0	0.2	0
C2orf48	2p25.1	2.18	3.72	2.33	2.98	2.56	2.04	1.9	0.8	0.39	1.21	0.71	3.22	5.37	0	4.47	1.81	0.6	1.13	0.01	0	0	0	0	0	0	0	0	0	0	0	0	0	0	0	0	0.19
HPCAL1	2p25.1	4.97	6.2	5.93	7.28	5.72	3.56	5.51	2.4	0.97	3.93	5.13	7.24	3.9	1.42	7.45	7.03	1.01	2.64	0.02	0	0	0	0	0	0	0	0	0	0	0.2	0	0	0	0	0	0
ODC1	2p25.1	6.34	7.44	8.07	9.27	6.9	4.07	7.03	3.2	1.17	4.83	6.37	8.65	7.8	1.83	7.87	8.39	1.21	4.71	0.02	0	0	0	0	0	0	0	0.19	0	0	0	0	0	0	0	0.2	0
NOL10	2p25.1	4.38	3.97	5.25	4.3	4.93	2.04	2.66	1.6	0.39	6.04	4.25	4.43	10.73	2.03	4.68	5.67	0.8	4.14	0.19	0.25	0	0.33	0.59	0	0.19	0.27	0.19	0	0.35	0	0.73	0	0.21	0.23	0	0.38
ATP6V1C2	2p25.1	17.99	24.32	20.51	24.83	17.95	17.05	15.59	6.4	4.86	15.41	18.58	24.35	39.27	7.11	18.94	20.63	2.62	13.37	0.06	0	0.1	0	0.2	0.25	0.38	0	0	0	0	0	0	0	0	0.23	0	0
PDIA6	2p25.1	17.94	24.32	20.41	24.83	17.95	17.05	15.59	6.4	4.86	15.41	18.41	24.35	39.02	7.11	18.94	20.63	2.62	13.18	0.01	0	0	0	0	0	0	0	0	0	0	0	0	0	0	0	0	0.19
KCNF1	2p25.1	3.45	4.47	2.53	3.31	4.93	3.31	3.42	1.07	0	2.42	3.19	3.82	6.34	0.41	2.98	5.22	0.4	3.39	0.05	0	0	0	0	0.25	0	0	0	0	0	0.2	0	0	0	0.23	0	0.19
C2orf50	2p25.1	6.87	7.44	7.29	7.62	7.69	6.87	5.89	2.4	1.95	5.74	6.19	9.86	19.02	2.03	7.23	8.62	1.01	4.52	0.01	0	0	0	0	0	0	0	0	0	0	0	0	0	0	0	0	0.19
PQLC3	2p25.1	6.87	7.44	7.29	7.62	7.69	6.87	5.89	2.4	1.95	5.74	6.19	9.86	19.02	2.03	7.23	8.62	1.01	4.52	0.18	0.25	0.1	0.33	0.39	0	0.19	0	0.19	0.6	0.35	0	0	0.2	0	0.23	0.4	0.56
GREB1	2p25.1	13.58	17.12	16.42	14.9	15.78	13.74	11.6	5.6	2.33	10.27	12.92	19.11	32.68	3.66	15.11	14.74	1.21	11.11	0.1	0.5	0	0	0	0.25	0.19	0.27	0	0	0.35	0	0	0.2	0	0	0	0.19
NTSR2	2p25.1	4.81	5.21	5.73	6.62	6.51	3.56	4.18	1.87	0.19	2.42	4.96	5.43	10.73	1.22	5.32	4.76	0	4.71	0.04	0	0.1	0	0	0	0.19	0	0	0	0	0	0	0	0	0	0	0
LPIN1	2p25.1	9.47	11.91	11.66	7.95	13.41	8.65	8.94	2.93	3.11	6.95	8.85	12.88	18.05	2.03	7.66	10.66	2.21	7.16	0.6	0	0.78	0.66	0.39	0.25	0.38	0.8	0.97	0.3	0.53	1.41	0.49	0.61	0.64	0.45	0.2	0.94
TRIB2	2p24.3	0.32	0.25	0.19	0.33	0.2	0.25	0.57	0	0	0.6	0.71	0.4	0.24	0	0.21	0.68	0	0.38	0.01	0	0.1	0	0	0	0	0	0	0	0	0	0	0	0	0	0	0
FAM84A	2p24.3	0.11	0	0.19	0	0.2	0	0	0.27	0	0	0	0.2	0	0	0	0	0	0.56	0	0	0	0	0	0	0	0	0	0	0	0	0	0	0	0	0	0
NBAS	2p24.3	18.5	22.58	20.02	20.53	24.06	13.99	15.78	10.67	7.39	15.71	20	21.33	31.71	8.33	17.23	22.22	7.65	17.14	0.21	0.25	0.19	0	0.2	0.25	0	0.53	0	0	0.18	0.4	0.49	0.2	0.21	0.45	0	0.56
DDX1	2p24.3	10.91	13.4	11.56	11.59	9.47	8.91	8.37	4	3.11	7.55	11.5	15.9	24.15	2.85	14.26	12.7	1.61	9.04	0.05	0	0.1	0	0	0	0.19	0	0.39	0	0	0	0	0	0	0	0.2	0
MYCN	2p24.3	0.12	0.25	0	0	0	0	0	0	0.19	0.3	0.18	0	0	0	0	0.23	0.2	0	0.03	0	0	0.33	0	0	0	0	0	0.3	0	0	0	0	0	0	0	0
FAM49A	2p24.2	6.5	10.17	5.34	10.26	7.1	5.34	6.08	4	0.58	4.83	7.08	9.05	17.07	1.02	7.23	8.39	1.21	4.33	0.01	0	0	0	0.2	0	0	0	0	0	0	0	0	0	0	0	0	0
VSNL1	2p24.2	2.51	3.72	2.33	1.32	5.33	1.53	1.52	1.33	0.39	1.51	2.48	2.82	6.34	0.2	2.98	3.63	0.6	0.94	0.01	0	0.1	0	0	0	0	0	0	0	0	0	0	0	0	0	0	0
SMC6	2p24.2	8.09	8.93	9.62	9.6	9.07	6.87	7.79	2.4	1.56	4.83	8.32	13.08	16.34	1.63	8.3	8.16	1.41	6.78	0.01	0	0	0	0	0	0	0	0	0	0	0	0	0	0	0	0	0
GEN1	2p24.2	11.69	15.14	12.05	15.89	11.24	12.72	12.17	5.6	3.11	6.34	13.27	18.11	20.73	3.46	12.34	12.02	2.41	9.23	0.19	0.25	0.29	0	0.2	0	0.19	0	0.19	0	0.53	0.4	0	0.61	0.21	0	0	0.38
KCNS3	2p24.2	7.04	10.17	7.58	8.61	6.71	5.34	6.27	2.93	0.97	6.65	5.13	8.65	17.56	1.22	7.23	7.94	1.41	6.21	0.46	0.5	0.68	0.66	0.2	0.51	0.38	1.07	0.19	0	0.35	0.2	0.49	1.42	0.21	0.68	0.4	0.56
NT5C1B	2p24.2	0.02	0	0.1	0	0	0	0	0	0	0	0	0	0	0	0	0	0	0	0.03	0	0	0	0.2	0	0	0	0	0	0	0	0	0	0	0	0	0
OSR1	2p24.1	0.85	0.99	1.75	0.66	0.59	1.27	0.38	0.27	0	0.6	1.59	0.2	2.93	0	0.21	0.68	0	0.94	0.01	0	0	0	0	0	0	0	0.19	0	0	0	0	0	0	0	0	0
TTC32	2p24.1	9.27	12.16	9.43	10.6	9.86	8.91	7.98	3.2	2.14	5.74	9.56	12.88	21.71	2.24	11.06	10.2	1.21	6.21	0.01	0	0	0	0	0	0	0	0	0	0	0	0	0	0	0	0	0.19
WDR35	2p24.1	10.91	11.91	10.3	12.25	11.64	10.18	9.13	4.27	2.53	9.06	10.97	14.89	27.07	2.44	13.19	13.61	2.62	7.16	0.41	0.5	0.49	0.66	0.2	0.25	0.19	0.27	0	0	0.35	0.4	0.73	0.2	0.64	0.23	0.8	0.94
LAPTM4A	2p24.1	2.31	2.73	2.24	1.99	2.17	2.54	1.71	0.8	0.58	1.81	2.48	3.22	5.12	0.41	3.83	2.95	0.2	2.07	0	0	0	0	0	0	0	0	0	0	0	0	0	0	0	0	0	0
SDC1	2p24.1	0.97	1.24	0.97	0.66	1.18	1.27	0.57	0.8	0	0.3	1.95	1.81	1.46	0.41	1.49	0.91	0	0.56	0.04	0	0	0	0	0.25	0	0	0	0.3	0.18	0.2	0	0	0	0	0	0
PUM2	2p24.1	1.19	1.74	1.07	1.32	0.99	1.02	0.95	0.53	0.19	0.6	1.95	2.01	1.95	0.41	1.91	1.81	0.2	1.13	0.01	0	0	0	0	0	0	0	0.19	0	0	0	0	0	0	0	0	0
RHOB	2p24.1	0.4	0.25	0.49	0.33	0	0	0.38	0.53	0.39	0.91	0.18	1.21	0.24	0	0.64	0.23	0	0.19	0	0	0	0	0	0	0	0	0	0	0	0	0	0	0	0	0	0
HS1BP3	2p24.1	12.63	18.11	12.05	17.55	12.03	8.65	10.46	6.4	4.09	10.27	12.92	17.71	20	3.66	14.68	18.14	3.42	8.47	0	0	0	0	0	0	0	0	0	0	0	0	0	0	0	0	0	0
GDF7	2p24.1	12.24	17.62	11.66	16.56	11.24	8.65	9.7	6.4	3.89	9.97	12.74	17.71	19.76	3.86	14.47	17.91	3.22	7.91	0.03	0	0	0	0.2	0.25	0	0	0	0	0	0	0	0	0	0.23	0	0
C2orf43	2p24.1	3.06	3.72	3.89	4.3	4.54	2.54	1.9	1.33	0	4.83	1.77	3.22	8.05	0.81	1.28	2.49	0.2	2.45	0.06	0	0.1	0	0.2	0	0.19	0.27	0	0	0	0	0	0.2	0	0	0	0
APOB	2p24.1	13.65	14.14	15.84	16.23	14.4	13.74	10.65	5.6	3.31	6.34	13.81	16.7	32.2	2.24	15.74	16.55	2.41	11.11	0.49	0.25	0.19	1.32	0.39	1.02	0	0.53	0.78	0	0.71	0.4	0.73	0.41	0.21	0.23	0.6	0.56
UBXN2A	2p23.3	4.75	6.7	5.93	5.96	4.73	3.56	3.99	1.33	1.56	4.23	5.13	5.83	11.46	0	5.11	4.76	0.6	3.2	0.02	0	0	0	0	0	0.19	0	0	0	0	0	0	0	0	0	0	0.19
C2orf44	2p23.3	4.48	5.96	4.66	5.63	4.14	5.34	5.89	1.33	1.17	3.32	5.49	5.63	8.05	2.03	5.53	4.76	1.01	3.95	0.01	0	0	0	0	0	0	0	0	0.3	0	0	0	0	0	0	0	0
FKBP1B	2p23.3	4.46	5.71	4.66	5.63	4.14	5.34	5.89	1.33	1.17	3.32	5.49	5.63	8.05	2.03	5.53	4.76	1.01	3.95	0.09	0.25	0.19	0.33	0	0	0	0	0	0	0.18	0	0	0.2	0	0	0	0.38
TP53I3	2p23.3	7.93	11.17	7	9.6	9.86	9.16	9.13	3.2	2.72	7.85	8.85	10.06	16.59	3.05	10.64	7.26	1.81	6.03	0.14	0.5	0	0	0.59	0	0.19	0	0.19	0	0.18	0.2	0	0	0.21	0.23	0	0.38
PFN4	2p23.3	5.84	8.68	5.15	6.29	8.28	6.36	6.27	2.67	2.33	5.44	6.19	7.85	12.2	2.24	7.87	5.67	1.61	3.95	0.12	0	0.1	0	0.39	0	0	0.27	0.39	0	0	0.2	0	0	0	0.23	0	0.38
ITSN2	2p23.3	8.02	12.41	8.16	8.28	10.26	5.85	5.7	4.27	2.33	8.76	8.67	10.66	17.07	2.44	8.72	7.94	1.61	7.34	0.26	0	0.58	0	0	0	0	0	0.19	0.3	0.18	0.4	0.24	0.61	0	0.23	0.4	0.19
NCOA1	2p23.3	5.25	7.69	5.54	5.3	6.31	4.07	4.37	1.33	0.58	4.23	5.13	7.44	10.73	0.81	7.02	5.67	0.4	4.33	0.04	0.25	0.1	0	0	0	0	0	0	0	0	0	0	0	0	0	0.4	0
CENPO	2p23.3	8.91	12.16	8.55	11.26	10.85	9.16	7.22	4	2.33	6.34	10.27	10.66	18.54	1.63	10.64	8.62	2.82	6.4	0.1	0.25	0	0	0	0	0	0.27	0	0	0.18	0.2	0	0.2	0.21	0	0.6	0
ADCY3	2p23.3	10.51	14.14	9.91	12.58	11.64	10.69	8.56	4	2.92	7.55	12.04	14.08	19.51	2.03	14.89	10.88	3.42	7.91	0.2	0.5	0.1	0	0	0	0.38	0.27	0.19	0	0	0.4	0.24	0	0.21	0.45	0	0.56
DNAJC27	2p23.3	7.02	9.68	7	5.63	6.31	6.36	5.51	2.4	2.14	5.14	7.08	8.85	11.46	2.03	10.43	8.39	2.01	4.9	0.11	0	0.19	0	0	0	0.19	0.27	0	0.3	0.18	0	0	0.2	0	0	0.2	0
POMC	2p23.3	0.06	0	0	0	0.2	0	0	0	0	0	0	0	0.24	0	0.21	0	0	0	0.05	0	0	0	0	0	0.19	0	0	0.3	0	0	0	0	0	0	0.2	0
DNMT3A	2p23.3	7.06	8.19	7.48	7.95	8.68	6.36	6.46	3.47	2.14	2.42	7.43	6.84	13.9	2.44	8.3	9.3	1.01	5.65	0.59	0.5	1.17	0.66	0.79	1.02	0.19	0	0.19	0	0.53	1.21	0.73	0.61	0.64	0.45	0	0.75
KIF3C	2p23.3	3.44	6.2	4.08	4.3	3.75	2.8	2.85	1.87	0.39	1.81	4.25	2.62	4.63	0.81	3.19	3.4	0.8	3.01	0.07	0	0.19	0	0.2	0	0	0.27	0	0	0	0	0	0.2	0	0.23	0	0.19
RAB10	2p23.3	3.85	5.96	3.6	3.97	2.37	2.29	3.61	1.87	1.56	2.11	4.07	6.44	8.78	1.63	4.68	1.81	2.01	2.82	0	0	0	0	0	0	0	0	0	0	0	0	0	0	0	0	0	0
HADHA	2p23.3	7.13	8.93	6.32	8.28	9.27	6.87	4.56	3.2	1.17	5.74	7.08	8.05	13.66	3.25	9.79	7.48	1.81	5.08	0.39	0.25	0.49	0.33	0	0.76	0.19	0	0	0.3	0	1.01	1.46	0.2	0.21	0.23	0.4	0.75
HADHB	2p23.3	12.8	17.62	14.77	15.23	14.2	8.91	8.94	6.4	2.72	12.39	13.1	14.69	26.83	4.27	15.53	15.87	3.62	8.85	0.52	0.25	0.49	0.66	0.39	0.51	1.14	0.8	0	0.3	0.71	0.4	0.24	1.22	0.43	0.23	0.8	0.38
GPR113	2p23.3	12.08	16.63	14.38	14.57	14	8.4	8.56	6.13	2.72	11.78	12.21	13.68	25.37	3.66	14.26	14.51	3.22	8.1	0.18	0.25	0.19	0.33	0.2	0	0.19	0.27	0	0.3	0.35	0	0.49	0.2	0.43	0.23	0	0
OTOF	2p23.3	14.1	17.62	14.67	16.23	16.37	12.47	11.41	8.27	2.92	12.39	13.1	18.11	25.37	4.27	15.32	18.37	2.21	10.92	1.46	1.99	1.36	2.32	1.18	1.78	0.76	0.27	1.36	2.11	1.24	1.41	0.98	1.42	1.7	0.91	1.81	1.69
CIB4	2p23.3	5.83	6.7	7	8.61	5.33	3.82	4.56	2.67	0.97	3.93	6.73	6.24	13.66	1.02	7.23	6.8	1.01	5.27	0.18	0.25	0.29	0	0	0	0.19	0	0.58	0.3	0	0.4	0.49	0.2	0	0	0	0.19
KCNK3	2p23.3	0.07	0	0.19	0.33	0	0	0	0	0	0	0.35	0	0	0	0	0	0	0.19	0	0	0	0	0	0	0	0	0	0	0	0	0	0	0	0	0	0
CENPA	2p23.3	6.2	8.19	5.25	8.28	6.71	7.38	3.99	2.93	2.33	3.63	5.31	7.85	11.95	1.83	6.38	8.16	2.41	5.27	0	0	0	0	0	0	0	0	0	0	0	0	0	0	0	0	0	0
DPYSL5	2p23.3	6.5	8.19	7	4.97	9.27	4.33	7.03	4	2.14	5.14	6.55	8.05	13.17	1.42	5.32	7.71	1.41	6.03	0.35	0.5	0.49	0.33	0.39	0	0.19	0.53	0.19	0.6	0.18	0.8	0.24	0.41	0.64	0.45	0.4	0.19
MAPRE3	2p23.3	4.21	4.96	4.96	3.31	5.33	2.04	4.37	1.33	0.78	3.02	4.07	5.43	9.02	0.81	4.89	3.17	1.01	3.58	0.01	0	0	0	0	0	0	0	0	0	0	0.2	0	0	0	0	0	0
AGBL5	2p23.3	10.86	11.66	11.86	10.93	14	10.18	10.27	4.8	2.14	7.85	11.33	13.48	22.93	2.85	11.7	9.52	1.41	7.72	0.06	0	0	0	0	0	0	0	0	0	0.35	0.2	0	0	0	0.23	0.2	0
EMILIN1	2p23.3	10.38	11.17	10.88	12.25	13.21	10.43	9.7	4.27	1.95	8.76	11.15	13.48	21.95	2.03	10.85	9.75	1.21	7.91	0.01	0	0	0	0	0	0	0	0	0	0	0	0	0	0	0	0	0
KHK	2p23.3	12.18	13.65	12.83	15.56	14.99	11.45	11.03	4.8	2.14	11.48	12.57	14.49	25.37	3.05	13.19	12.02	1.81	9.98	0.21	0	0.19	0	0.39	0	0.19	0	0.19	0.3	0.18	0.2	0	0.2	0	0.45	0.2	0.56
ABHD1	2p23.3	8.16	8.68	8.94	11.26	8.68	6.62	7.22	3.2	1.17	8.76	7.43	9.66	15.85	1.42	7.87	8.39	1.41	7.91	0.2	0	0.1	0	0	0.76	0	0	0.58	0.3	0.35	0	0.49	0.2	0	0.45	0.2	0.38
PREB	2p23.3	8.44	9.68	9.33	11.26	9.07	6.62	7.79	3.2	1.36	8.76	7.79	9.86	15.85	1.42	8.09	8.39	1.41	8.1	0.13	0	0	0	0.2	0.25	0.19	0	0.19	0	0.71	0.2	0	0	0	0.23	0	0
TCF23	2p23.3	6.29	5.71	6.8	8.94	6.51	3.56	5.13	1.87	0.58	6.95	6.02	7.04	13.66	1.22	6.38	7.03	1.21	6.21	0.04	0	0.19	0	0	0	0	0	0	0	0	0	0	0	0	0.23	0	0
SLC5A6	2p23.3	9.41	12.41	11.47	13.91	9.86	9.16	7.98	4.53	3.11	4.53	9.56	10.66	18.78	2.03	11.7	9.75	4.02	7.91	0.3	0	0.29	0.33	0.39	0.51	0	0.27	0	0.3	0.18	0.4	0.73	0.41	0.21	0.23	0	0
CAD	2p23.3	9.85	12.41	12.44	14.24	11.05	9.41	8.56	4.8	3.11	5.14	10.09	10.66	19.76	2.64	11.91	9.75	4.23	8.47	1.47	1.24	1.94	1.66	0.99	1.78	1.33	2.67	1.17	1.21	1.42	1.41	0.49	1.22	1.28	0.45	1.81	2.07
SLC30A3	2p23.3	8.22	11.41	9.72	12.25	9.47	7.89	7.22	4.53	2.14	5.14	8.85	8.05	16.34	1.83	9.79	7.94	3.02	9.04	0.07	0	0.1	0	0	0	0	0	0	0	0.35	0	0	0.81	0	0	0	0
DNAJC5G	2p23.3	9.56	12.41	10.98	13.25	10.65	8.65	8.17	5.6	2.92	4.83	10.44	9.46	20.73	2.24	12.13	8.84	3.62	10.73	0.06	0	0.29	0.33	0	0.25	0	0	0	0	0	0	0	0	0.21	0	0	0
TRIM54	2p23.3	6.57	7.44	8.07	9.93	7.1	5.34	5.89	3.73	0.97	3.02	7.08	5.83	15.37	1.22	8.3	6.12	2.01	7.72	0.22	0.25	0.19	0.66	0	0	0	0.27	0	0.6	0.71	0	0.73	0	0.21	0.23	0.2	0.19
MPV17	2p23.3	6.2	6.95	7.19	10.93	6.51	4.07	4.94	3.73	0.97	2.42	6.73	6.64	15.12	0.61	8.09	6.12	1.81	7.16	0.14	0.5	0.29	0	0	0	0.19	0	0.19	0	0.18	0.2	0	0	0.64	0.23	0	0.19
GTF3C2	2p23.3	8.88	10.42	11.56	12.58	10.26	7.89	6.46	3.73	2.14	3.32	8.67	11.07	21.71	1.63	11.28	8.62	1.41	9.04	0.03	0.25	0	0	0	0	0	0.27	0.19	0	0	0	0	0	0	0	0	0
EIF2B4	2p23.3	8	10.17	10.5	9.6	9.47	7.12	6.27	2.93	1.75	3.02	6.9	10.26	20.24	1.02	9.36	7.26	1.01	8.47	0.4	0.5	0.19	1.32	0.39	0.51	0.19	0.27	0.78	0	0.53	0.2	0.73	0.2	1.06	0.68	0	0.56
SNX17	2p23.3	7.99	10.17	10.4	9.6	9.47	7.12	6.27	2.93	1.75	3.02	6.9	10.26	20.24	1.02	9.36	7.26	1.01	8.47	0.02	0	0.1	0	0	0	0	0	0	0	0	0	0	0	0	0	0	0.19
ZNF513	2p23.3	7.08	9.68	9.72	9.27	8.48	6.36	5.7	2.13	1.36	2.11	5.49	8.85	18.29	1.02	7.23	6.58	0.6	7.16	0.02	0	0.1	0	0	0	0	0	0.19	0	0	0	0	0	0	0	0	0
PPM1G	2p23.3	10.02	11.41	12.54	13.25	11.83	10.18	8.94	4.27	3.11	3.63	8.14	12.88	21.22	2.64	11.28	10.88	1.61	9.23	0	0	0	0	0	0	0	0	0	0	0	0	0	0	0	0	0	0
NRBP1	2p23.3	10.16	10.67	11.08	14.24	12.03	10.43	8.94	5.07	2.53	6.95	10.44	11.67	20	3.86	11.7	10.66	2.41	9.6	0.02	0	0	0	0.2	0	0	0	0	0	0	0	0	0	0	0	0	0
IFT172	2p23.3	13.04	14.39	13.8	19.87	14.79	13.74	11.22	5.6	4.86	8.16	14.69	14.69	25.85	6.1	13.83	14.06	3.02	11.68	0.55	0.5	0.39	0	1.18	1.02	0.19	0.27	0.39	0	0.53	0.6	0.98	0.2	1.7	0	0.8	1.32
KRTCAP3	2p23.3	10.14	10.42	10.98	14.24	12.03	10.43	8.94	5.07	2.53	6.95	10.44	11.67	20.49	3.66	11.7	10.66	2.41	9.6	0	0	0	0	0	0	0	0	0	0	0	0	0	0	0	0	0	0
FNDC4	2p23.3	11.62	12.66	12.83	17.22	13.21	11.96	10.27	4.53	3.7	8.46	14.34	12.47	23.66	4.88	11.7	12.47	3.02	10.17	0.01	0	0	0	0	0	0	0	0	0	0	0	0	0	0	0.23	0	0
GCKR	2p23.3	9.22	10.67	10.01	13.25	9.66	9.41	8.37	3.2	2.92	5.74	11.68	11.47	18.78	3.25	8.94	10.43	1.61	7.91	0.47	0	0.58	0	0.2	0.76	0.19	0.8	0.19	0.3	0.35	0	1.71	0.2	0.64	0.23	0.8	0.75
ZNF512	2p23.3	8.98	13.4	8.94	9.27	10.06	7.12	7.41	4	1.17	7.55	11.68	9.05	15.12	0.81	12.77	10.66	1.41	6.78	0.01	0	0	0	0	0	0	0	0	0	0	0	0	0	0	0	0	0.19
CCDC121	2p23.3	9.87	13.9	10.01	10.6	11.24	7.89	8.17	4	1.17	8.16	12.74	9.66	18.54	1.83	13.4	11.56	1.41	7.53	0.03	0	0.1	0	0.2	0	0	0	0.19	0	0	0	0	0	0	0	0	0
GPN1	2p23.3	10.11	13.9	10.2	11.26	12.03	8.14	8.37	4.27	1.17	8.16	13.27	9.86	19.02	1.83	13.62	11.79	1.41	7.53	0.02	0	0	0	0.2	0	0	0	0	0	0	0	0	0	0	0	0	0.19
SLC4A1AP	2p23.3	7.65	10.17	8.26	9.27	8.88	6.62	6.27	4	0.19	4.83	10.09	7.24	14.88	1.63	8.51	7.94	0.8	6.21	0.17	0.25	0.29	0	0	0	0.19	0	0	0.3	0.35	0	0.24	0.2	0.43	0.23	0.4	0
MRPL33	2p23.2	0.4	1.24	0.39	0.99	0.39	0	0	0	0.39	0.6	0.53	0.4	1.22	0.2	0.21	0	0	0.75	0.03	0	0.1	0	0	0	0	0	0	0	0	0	0	0	0	0	0	0.38
RBKS	2p23.2	2.29	3.72	2.33	2.65	1.18	2.04	2.09	1.33	0	1.81	2.83	3.02	2.68	0.2	3.83	4.99	0.2	1.51	0.25	0.25	0.39	0	0	0.25	0	0	0.39	0	0.18	0	0.24	0	0.21	0.45	0.8	0.56
BRE	2p23.2	0.77	0.99	1.26	0.33	0.79	0.76	0.76	0.27	0	0.3	0.89	0.8	1.95	0.2	1.28	0.45	0.4	0.75	0.01	0	0	0	0	0.25	0	0	0	0	0	0	0	0	0	0	0	0
FOSL2	2p23.2	2.97	2.73	2.43	4.3	1.18	2.54	1.71	0.53	0.39	1.81	2.3	3.22	7.8	0.81	2.55	3.17	1.21	2.26	0.03	0	0	0	0	0.51	0.19	0	0	0	0	0	0	0	0	0	0	0
PLB1	2p23.2	17.74	23.08	17.49	20.2	22.68	16.79	15.02	6.67	4.47	13.6	18.94	20.72	34.63	6.5	21.91	19.5	4.02	14.69	0.58	0.5	0.39	1.32	0.59	1.02	0.19	0.53	0.39	1.21	0.53	1.01	0.49	0	0.85	0.68	0.2	0.38
PPP1CB	2p23.2	5.22	5.46	6.22	6.29	4.93	5.34	3.99	2.93	0.39	3.02	4.6	10.26	10.98	1.42	4.26	4.99	0.4	3.95	0	0	0	0	0	0	0	0	0	0	0	0	0	0	0	0	0	0
FAM179A	2p23.2	9.84	13.65	10.01	11.26	12.82	6.36	9.13	4.8	2.33	4.83	8.14	12.07	19.27	4.67	10.43	11.11	3.82	8.1	0.17	0	0.1	0.66	0.2	0.25	0.19	0	0.19	0	0.18	0.4	0.24	0	0.43	0	0	0.19
SPDYA	2p23.2	7.18	7.94	7.39	8.28	8.28	7.38	6.27	3.47	1.56	3.63	6.9	10.46	14.39	1.22	9.15	5.67	0.8	6.03	0.06	0	0	0	0	0	0	0	0	0	0.18	0.2	0	0.2	0.21	0	0	0
TRMT61B	2p23.2	7.16	7.94	7.29	8.28	8.09	7.38	6.27	3.47	1.56	3.63	6.9	10.46	14.39	1.22	9.15	5.67	0.8	6.03	0.09	0	0	0.33	0.2	0	0.19	0	0	0.6	0	0.2	0.24	0.41	0	0	0	0
CLIP4	2p23.2	12.14	16.87	11.27	11.92	13.81	8.91	10.65	5.87	2.33	7.85	13.27	15.49	25.61	2.64	16.6	14.06	3.02	8.66	0.18	0	0.19	0.33	0.2	0.25	0	0.27	0.39	0.6	0.18	0	0.24	0.61	0	0.45	0	0
ALK	2p23.2	14.36	16.38	14.97	21.19	15.58	11.45	13.31	7.2	2.92	7.85	16.99	17.51	30	4.88	16.6	17.69	2.82	11.3	0.46	0.25	0.87	0	0.2	0.51	0.57	0.53	0.19	0	0.71	0.2	0.24	0.81	0	0.45	0	0.38
YPEL5	2p23.1	2.81	3.97	3.01	1.32	3.16	1.53	2.47	1.07	0.39	2.72	2.83	4.02	6.34	0.61	4.04	4.76	0.2	1.32	0	0	0	0	0	0	0	0	0	0	0	0	0	0	0	0	0	0
LBH	2p23.1	0.23	0	0.87	0.33	0	0.25	0.38	0.27	0.19	0	0	0	0.49	0	0	0	0	0.19	0	0	0	0	0	0	0	0	0	0	0	0	0	0	0	0	0	0
LCLAT1	2p23.1	5.83	7.94	6.61	7.28	6.51	5.09	5.51	2.13	0.78	3.93	6.37	6.24	8.54	1.42	6.6	5.67	0.8	4.14	0.18	0	0.29	0.33	0.2	0.51	0.19	0.27	0	0	0	0.2	0	0	0.43	0.23	0	0.38
GALNT14	2p23.1	4.6	5.71	4.96	6.62	4.73	4.07	3.8	1.07	0.19	3.63	6.37	5.63	9.27	1.63	5.11	4.99	0.2	3.01	0.38	0.25	0.58	0	0.2	0.51	0	0.27	0.58	0.6	0.35	0.4	0.49	0.2	0.64	0	0.4	0.19
EHD3	2p23.1	2.88	3.23	4.18	3.97	2.76	1.53	3.04	1.87	0.39	1.81	3.01	3.62	5.37	0.81	2.55	3.4	0.6	1.51	0.25	0.5	0.1	0.33	0.2	0.25	0	0.8	0	0.3	0	0	0.24	1.02	0.85	0.68	0	0.19
XDH	2p23.1	14.07	17.37	13.12	17.55	17.55	13.49	12.93	6.4	3.7	11.48	15.58	16.7	25.37	7.32	14.04	16.1	3.82	9.6	0.46	0.25	0.58	0	1.18	0.51	0.57	0.27	0.39	0.6	0.71	0.4	0.73	0.2	0.85	0	0.2	0
DPY30	2p23.1	0.13	0	0.1	0	0.2	0.25	0.38	0	0	0.3	0	0.2	0.24	0	0	0.23	0.2	0	0	0	0	0	0	0	0	0	0	0	0	0	0	0	0	0	0	0
MEMO1	2p23.1	0.14	0	0.29	0.33	0.39	0	0.19	0	0	0	0.18	0	0.24	0	0.21	0	0.2	0	0	0	0	0	0	0	0	0	0	0	0	0	0	0	0	0	0	0
SPAST	2p22.3	2.97	2.73	3.89	2.65	5.13	0.51	1.9	1.6	0.39	2.11	1.77	3.42	5.61	1.02	1.06	2.27	0.6	2.82	0.28	0.74	0.49	0.33	0.39	0.25	0.38	0	0	0	0.53	0.2	0.49	0.2	0	0.23	0.4	0.19
SLC30A6	2p22.3	0.93	0.74	1.07	2.32	1.18	0.76	0.57	0	0	1.51	0.89	0.2	0.98	1.02	0.64	0.68	0.4	1.13	0.09	0	0.29	0.33	0	0	0.38	0.27	0	0	0	0	0	0.2	0	0	0	0.19
NLRC4	2p22.3	6.66	10.67	7.19	7.62	7.5	7.38	5.32	2.67	1.36	5.74	6.9	7.04	11.71	2.44	5.11	8.16	2.21	3.39	0.23	0.25	0.1	0	0.59	0	0.19	0.27	0	0	0.71	0	0.49	0	0.21	1.13	0	0
YIPF4	2p22.3	6.52	10.42	7.19	7.28	7.5	6.87	5.7	2.67	1.36	4.53	6.73	7.44	11.71	2.24	4.89	7.71	1.81	3.2	0	0	0	0	0	0	0	0	0	0	0	0	0	0	0	0	0	0
BIRC6	2p22.3	9.55	13.65	8.84	9.27	12.23	5.85	8.75	2.93	1.95	7.55	11.5	11.87	18.54	5.49	8.72	10.43	3.82	6.97	0.76	0.5	0.97	1.99	1.18	0.25	0.95	0.8	0.97	0.6	0.35	0.8	0	0	0.43	0.45	1.61	0.75
TTC27	2p22.3	9.81	12.9	9.91	12.58	9.66	8.65	8.37	1.6	1.75	9.37	10.97	10.06	20.73	4.67	11.91	9.98	1.61	7.72	0.12	0.25	0.1	0	0	0	0.19	0	0.19	0	0.18	0	0	0.41	0	0.68	0	0.19
FAM98A	2p22.3	0.73	1.74	0.68	0.66	1.38	0.51	0.57	0	0	0.6	1.24	1.21	1.22	0.41	0.43	0.68	0.2	1.13	0.06	0.25	0.1	0	0	0	0	0.53	0.19	0	0	0	0	0	0	0	0	0.19
CRIM1	2p22.3	6.82	9.93	6.9	6.62	8.28	4.83	5.51	2.13	0.58	4.23	6.37	8.05	10.73	2.64	5.53	7.26	0.8	7.16	0.04	0	0	0	0	0	0	0	0	0	0.18	0	0	0.2	0.21	0	0	0
VIT	2p22.2	7.01	6.7	6.9	8.94	9.66	6.36	3.99	3.73	1.95	6.34	5.31	7.44	13.41	2.64	5.32	10.2	1.21	5.84	0.72	1.49	1.26	0	0.59	0.76	0.57	0.53	0.58	1.21	0.53	0.6	0.73	0.41	0.85	0.91	0.8	0.94
STRN	2p22.2	5.21	7.69	4.96	3.97	6.11	6.11	4.94	4	0.78	3.02	6.73	5.03	8.54	2.44	4.89	7.26	0.8	4.52	0.06	0.25	0.1	0	0	0.25	0.19	0	0	0	0	0	0	0	0.21	0	0	0.19
HEATR5B	2p22.2	11.68	14.89	10.59	11.59	14.6	10.94	10.46	5.07	4.09	8.76	13.1	13.08	19.27	6.71	14.26	15.42	2.41	10.73	0.15	0	0.19	0	0	0	0	0.27	1.17	0	0	0	0	0.2	0.21	0	0	0.38
EIF2AK2	2p22.2	8.19	10.17	7.29	9.27	11.24	4.33	7.03	3.2	2.53	5.14	7.96	11.67	13.41	3.86	10	10.88	3.22	6.21	0.07	0	0	0	0.39	0	0.19	0	0	0	0	0	0	0	0	0.23	0.4	0
SULT6B1	2p22.2	11.53	13.15	10.2	15.23	14.4	8.4	10.08	4.8	4.47	7.85	12.74	15.49	19.02	4.67	12.34	15.19	4.63	9.04	0.17	0.5	0.29	0	0.2	0	0	0	0.39	0.3	0.35	0	0	0	0.21	0	0.2	0.19
CEBPZ	2p22.2	13.21	15.38	12.15	17.88	16.37	10.69	10.65	7.2	4.86	9.06	15.04	17.91	21.22	5.49	14.47	16.33	4.63	10.36	0.01	0	0	0	0	0.25	0	0	0	0	0	0	0	0	0	0	0	0
PRKD3	2p22.2	8.39	9.68	10.3	10.26	9.07	8.4	7.22	3.2	1.56	6.95	7.61	10.66	13.9	3.05	12.34	9.52	1.61	6.03	0.08	0	0.19	0.33	0	0	0	0	0.19	0	0.18	0.2	0	0	0	0	0.4	0
QPCT	2p22.2	6.09	6.2	7.68	5.63	7.3	5.6	3.8	2.4	1.17	6.04	5.49	7.04	10.73	3.05	7.45	7.48	1.41	6.21	0.26	0.74	0.29	0	0	0.25	0	0.27	0.58	0	0.35	0.2	0.49	0.2	0.21	0.23	0.4	0.19
CDC42EP3	2p22.2	0.07	0	0.19	0.33	0	0	0	0	0	0.3	0.18	0	0	0	0	0	0	0.19	0.02	0	0	0	0	0	0	0	0	0	0	0	0	0.2	0	0	0	0
CYP1B1	2p22.2	6.4	9.68	6.22	7.28	5.52	6.87	6.84	2.67	1.95	5.44	6.55	7.85	9.51	2.85	6.38	5.9	1.61	4.14	0.12	0	0.29	0	0.2	0	0.19	0.27	0	0	0	0.2	0	0.2	0	0	0.2	0.19
ATL2	2p22.2	5.82	8.44	5.44	5.96	5.52	3.31	5.89	2.13	1.56	5.14	6.9	7.24	10.73	4.47	4.89	8.16	1.61	3.58	0.26	0.25	0.29	0.33	0	0	0.19	0	0.58	0.6	0.53	0	0.24	0	0.64	0.45	0.2	0.38
GALM	2p22.1	6.67	8.19	7.29	4.64	7.69	7.89	6.84	3.73	0.97	4.53	7.43	7.04	14.88	2.64	7.45	8.16	1.21	4.14	0.14	0.25	0.19	0	0	0	0.19	0	0.19	0.3	0	0.4	0	0	0	0	0.2	0
GEMIN6	2p22.1	8.78	11.17	8.36	10.6	11.05	9.67	8.94	3.2	1.56	7.85	8.85	9.86	14.88	5.28	9.36	9.52	2.41	6.4	0.01	0	0	0	0	0	0	0	0	0	0.18	0	0	0	0	0	0	0
SRSF7	2p22.1	4.08	5.96	4.66	2.98	5.52	5.09	3.23	1.87	1.17	3.63	3.89	4.43	9.02	1.42	4.04	4.08	0.4	1.69	0	0	0	0	0	0	0	0	0	0	0	0	0	0	0	0	0	0
DHX57	2p22.1	8.2	10.67	8.07	10.93	8.68	7.63	7.98	2.93	0.78	6.95	8.32	9.46	12.68	4.88	8.72	9.3	2.21	7.16	0.22	0	0.19	0	0.39	0	0	0.27	0.39	0.3	0.18	0.2	0	0.41	0	0.45	0.4	0.19
SOS1	2p22.1	2.71	1.99	2.92	3.64	4.14	1.27	2.28	0.8	0.39	4.23	3.54	2.62	5.61	0.81	1.7	2.72	0.8	4.52	0.52	0.5	0.1	0.33	0.39	0.51	0.38	0.53	0.58	1.21	0.35	0.2	0.98	1.22	0.64	0.68	0.6	0.94
CDKL4	2p22.1	0.8	0.99	1.17	1.32	0.39	0.76	0.19	1.07	0.58	0.91	0.89	0.4	0.73	0.81	0	0.68	0	1.13	0.12	0	0.1	0	0.2	0.51	0	0	0.19	0.3	0.35	0	0	0	0.21	0.23	0.2	0
MAP4K3	2p22.1	5.25	6.7	6.12	9.27	3.75	4.33	4.37	1.6	1.36	3.32	4.78	7.44	9.02	3.05	2.98	6.12	0.8	5.27	0.02	0	0.1	0	0	0	0	0	0	0	0	0	0	0	0	0	0	0.19
SLC8A1	2p22.1	0.24	0.25	0.19	0.66	0.2	0.25	0.57	0	0	0	0.35	0	0.49	0.2	0.64	0.45	0	0	0.09	0	0	0	0	0	0.19	0.27	0.58	0	0.18	0	0	0	0.21	0	0	0.19
PKDCC	2p21	2.28	1.49	3.11	1.66	1.58	1.53	2.28	1.87	0	1.81	1.95	2.82	5.61	1.02	1.49	2.72	0.6	2.45	0.03	0	0.1	0	0	0	0	0	0.19	0	0.18	0	0	0	0	0	0	0
EML4	2p21	5.86	8.19	6.03	5.63	7.5	4.33	4.37	3.73	0.97	3.93	5.66	6.24	10.98	1.83	6.6	10.2	0.6	2.45	0.28	0	0.1	0.33	0.59	0	0.38	0	0.39	0.6	0.89	0.2	0	0.2	0	0.23	0.8	0.38
COX7A2L	2p21	2.8	2.98	3.01	1.99	3.35	2.54	2.66	1.6	0.19	2.42	2.12	3.02	5.85	0.81	2.98	6.12	0.2	1.13	0.12	0.74	0.1	0	0	0.25	0	0.27	0.19	0	0	0	0.24	0.2	0	0	0	0.19
KCNG3	2p21	0.02	0	0	0	0	0	0	0	0	0	0.18	0	0	0	0	0	0	0	0.08	0	0.1	0	0	0.25	0	0	0.19	0.3	0	0	0	0	0	0.23	0.2	0
OXER1	2p21	8.34	9.18	7.97	8.61	8.88	7.12	7.03	4	1.36	6.34	8.85	11.87	15.85	3.86	8.09	8.84	2.41	7.16	0.02	0	0	0	0	0.25	0	0	0	0	0	0	0	0	0	0	0.2	0
HAAO	2p21	8.34	9.18	7.97	8.61	8.88	7.12	7.03	4	1.36	6.34	8.85	11.87	15.85	3.86	8.09	8.84	2.41	7.16	0.04	0	0	0	0	0.25	0	0	0	0	0	0	0	0	0.21	0.23	0	0
ZFP36L2	2p21	0.66	0.99	0.49	0.33	0.59	0.76	0.95	0.27	0.39	0.3	0.71	0.6	0.49	0.41	1.28	1.59	0.6	0.38	0	0	0	0	0	0	0	0	0	0	0	0	0	0	0	0	0	0
PLEKHH2	2p21	12.93	18.36	12.73	12.58	16.57	8.65	12.55	6.4	3.89	10.27	14.87	15.49	23.9	5.69	12.55	12.7	3.22	10.36	0.56	0.25	0.68	0.66	0	0.51	0.19	0.27	1.17	0.91	0.18	0.8	0.73	0.81	0.64	0.23	1.41	0
DYNC2LI1	2p21	10.62	14.89	9.43	14.24	10.45	11.45	12.17	4.8	2.14	8.16	11.15	14.89	17.8	7.72	8.72	11.56	5.63	7.91	0.12	0	0.19	0.33	0	0	0	0	0	0.3	0.18	0	0.24	0	0	0.45	0	0.19
ABCG5	2p21	19.17	25.06	19.34	22.19	19.53	22.39	18.63	10.4	5.06	12.69	20.35	26.56	31.71	12.6	17.45	20.63	8.65	15.82	0.46	0	0.68	0.33	0.2	0.76	1.52	0.27	0.39	0.6	0.35	0.2	0.24	0.41	0.64	0.45	0	0.56
ABCG8	2p21	18.11	21.84	19.14	18.87	19.72	21.12	15.02	9.87	4.67	11.48	17.52	25.15	31.46	11.99	17.02	19.73	6.64	15.63	0.45	0.5	0.39	0.66	0.2	0.25	1.14	0.27	0.58	0	0.35	0.6	0.49	0.41	0	0.23	0.4	0.19
LRPPRC	2p21	12.99	17.37	14.09	13.58	13.02	12.21	11.98	5.87	3.89	7.55	13.1	17.51	23.17	6.91	11.06	12.93	3.82	11.68	0.1	0.25	0.19	0	0	0	0.19	0	0.39	0.3	0.18	0	0	0.2	0	0	0.2	0
PPM1B	2p21	0.35	0.99	0.87	0	0.2	0	0.38	0.27	0	0.3	0.35	0.4	0.49	0.2	0.21	0.68	0	0.56	0	0	0	0	0	0	0	0	0	0	0	0	0	0	0	0	0	0
SLC3A1	2p21	9.81	9.18	9.52	11.59	11.83	7.63	8.75	5.87	4.47	7.85	11.15	12.47	13.9	5.49	9.79	11.34	3.62	6.4	1.59	1.24	1.46	1.66	1.38	1.27	1.9	1.87	1.36	2.42	2.12	1.81	1.46	1.42	1.7	0.91	1.81	1.88
PREPL	2p21	9.04	8.68	9.23	10.93	10.06	6.87	6.65	5.33	4.09	7.55	10.8	11.27	13.17	4.88	8.51	10.43	3.22	6.03	0.08	0	0	0	0.2	0.25	0.19	0	0	0.6	0.18	0	0.24	0	0	0	0	0
SIX2	2p21	0.04	0	0.1	0	0	0.25	0	0	0	0	0	0	0.24	0	0.21	0	0	0	0.13	0	0.19	0	0.2	0	0	0.27	0.19	0	0.53	0	0.24	0	0.43	0	0.2	0
SRBD1	2p21	6.47	7.44	6.9	9.93	7.1	3.82	5.51	2.13	0.97	5.14	6.02	5.83	11.22	1.83	8.3	8.84	1.21	5.27	0.07	0.25	0	0	0	0	0	0	0	0	0.18	0.4	0	0	0.21	0	0	0
PRKCE	2p21	0.23	0.25	0	0	0.39	0.25	0.19	0.53	0	0	0.53	0	0.73	0	0.43	0.45	0	0	0	0	0	0	0	0	0	0	0	0	0	0	0	0	0	0	0	0
EPAS1	2p21	5.65	9.18	5.44	5.96	6.51	6.87	3.23	2.93	0.58	4.83	5.13	8.65	11.95	1.63	4.68	5.67	0.6	5.65	0	0	0	0	0	0	0	0	0	0	0	0	0	0	0	0	0	0
ATP6V1E2	2p21	2.47	3.23	3.11	2.32	3.35	0.76	2.09	0.8	0.58	2.72	3.36	3.22	5.85	0.61	2.34	3.17	0.8	0.56	0.05	0	0	0.33	0	0	0.19	0	0.39	0	0	0	0	0	0	0	0	0.19
RHOQ	2p21	3.65	2.48	3.5	3.31	3.75	2.29	3.23	2.93	0.58	1.81	3.19	5.23	10.73	0.81	3.4	4.99	0.8	2.26	0.02	0	0.1	0	0	0	0.19	0	0	0	0	0	0	0	0	0	0	0
PIGF	2p21	3.99	2.73	3.79	3.64	4.54	2.54	3.23	2.93	0.78	1.81	3.54	6.04	11.22	0.81	3.4	5.44	0.8	3.2	0	0	0	0	0	0	0	0	0	0	0	0	0	0	0	0	0	0
CRIPT	2p21	3.99	2.73	3.79	3.64	4.54	2.54	3.23	2.93	0.78	1.81	3.54	6.04	11.22	0.81	3.4	5.44	0.8	3.2	0.05	0	0	0	0.2	0.51	0	0	0	0	0	0	0	0.2	0	0	0	0
SOCS5	2p21	6.07	8.19	5.93	4.97	7.1	4.83	6.84	3.73	0.78	1.81	4.96	7.44	11.22	3.05	6.81	6.35	2.01	5.46	0.02	0	0	0	0	0	0	0	0	0	0	0	0.24	0	0	0	0.2	0
MCFD2	2p21	2.1	1.49	1.55	1.66	2.76	1.02	1.52	1.6	0.39	0.91	1.06	3.22	3.9	1.22	2.77	2.72	0.2	1.88	0.16	0	0.19	0.66	0.2	0.25	0.57	0	0	0	0	0.6	0.24	0	0.21	0.23	0	0
TTC7A	2p21	10.1	11.41	9.14	12.91	12.03	7.63	8.75	3.47	2.53	10.57	11.33	14.29	16.1	6.1	9.79	11.11	5.43	7.72	0.09	0.25	0	0	0	0	0	0	0	0	0	0.2	0	0.2	0.21	0.23	0	0
CALM2	2p21	5.75	7.69	4.66	6.95	6.51	2.54	5.51	1.6	1.95	4.23	6.55	8.05	10	2.44	6.81	7.03	2.21	4.52	0	0	0	0	0	0	0	0	0	0	0	0	0	0	0	0	0	0
C2orf61	2p21	6.53	8.44	5.15	7.95	7.1	2.54	6.84	1.87	2.14	6.04	7.43	8.85	10.73	3.05	6.81	8.16	2.62	5.27	0	0	0	0	0	0	0	0	0	0	0	0	0	0	0	0	0	0
EPCAM	2p21	4.26	6.2	5.15	4.3	5.13	3.05	2.85	0.8	0.39	3.02	4.78	5.63	8.05	1.02	4.89	5.22	0.4	2.45	0.1	0	0.19	0	0.39	0	0	0	0	0.3	0	0	0.24	0.2	0	0	0	0.19
MSH2	2p21	4.8	5.96	4.28	5.3	5.92	2.54	2.85	1.07	1.56	4.53	4.96	6.84	8.54	2.24	5.74	6.35	1.21	4.33	1.18	1.99	0.87	0.99	0.99	0.76	0.38	1.07	1.75	0.6	1.24	0.8	1.71	1.42	1.7	1.81	0.6	2.07
MSH6	2p16.3	11.8	13.9	11.86	14.57	13.61	10.43	9.7	5.07	3.7	8.46	14.34	14.89	18.05	4.88	12.77	14.29	2.62	9.23	1.22	1.49	0.68	1.66	1.38	1.27	1.14	0.53	2.14	0.91	1.24	1.01	0.49	2.03	2.34	0.91	1.41	1.69
FBXO11	2p16.3	6.08	5.71	5.64	6.95	8.88	2.8	5.32	2.93	2.53	3.02	6.19	8.25	9.27	1.22	5.96	9.52	1.21	3.95	0.01	0	0	0	0	0	0	0	0.19	0	0	0	0	0	0	0	0	0
FOXN2	2p16.3	4	5.21	3.6	2.98	4.34	2.54	3.8	0.8	0.19	2.42	4.6	6.44	9.02	0.81	5.74	4.76	0.8	1.88	0.41	0.25	0.39	0	0.59	0.25	0.76	0.53	0.39	0.91	0.18	0.4	0	0.61	0.64	0.68	0.4	0.56
STON1	2p16.3	3.21	4.47	2.92	2.32	4.14	2.29	2.47	1.33	1.36	2.72	3.89	3.22	5.61	1.42	2.98	3.4	0.8	2.07	0	0	0	0	0	0	0	0	0	0	0	0	0	0	0	0	0	0
LHCGR	2p16.3	4.26	6.95	3.01	6.62	5.72	4.07	4.37	1.6	0.39	1.51	4.96	5.43	7.32	2.24	4.68	4.08	1.41	2.64	0.33	0.99	0.1	0.66	0	0	0.19	0.27	0.19	0.6	0.35	0.8	0.24	0.41	0.64	0.45	0	0.19
FSHR	2p16.3	5.92	6.45	6.03	7.95	6.51	7.38	6.27	1.33	0.97	3.63	6.02	7.65	9.51	0.81	6.38	7.48	1.41	4.14	0.17	0	0.39	0.33	0.2	0.25	0.19	0	0.19	0	0	0.2	0	0.41	0.21	0.23	0.2	0
NRXN1	2p16.3	1.14	0.25	1.55	1.66	0.79	0.76	0.76	0.27	0.19	0.6	0.89	1.01	1.95	0.61	1.06	1.59	0	1.32	0.22	0	0.49	0	0.2	0.51	0	0	0.19	0	0	0.4	0	0.2	0.21	0.45	0.2	0.75
CHAC2	2p16.2	2.71	3.97	2.53	2.98	2.96	1.27	2.47	0.8	0.78	3.02	2.3	3.82	5.37	0.61	3.83	5.44	0.4	1.69	0.14	0	0.29	0	0.2	0	0	0	0	0	0	0	0.24	0.41	0.21	0	0.2	0
ERLEC1	2p16.2	2.71	3.97	2.53	2.98	2.96	1.27	2.47	0.8	0.78	3.02	2.3	3.82	5.37	0.61	3.83	5.44	0.4	1.69	0.01	0	0	0	0	0	0	0	0	0	0	0	0	0	0	0	0	0.19
GPR75	2p16.2	10.13	13.15	10.69	11.59	12.43	10.43	7.6	4.53	3.31	7.85	10.62	12.47	17.56	3.66	12.77	12.93	2.01	8.66	0.03	0	0	0	0.2	0.25	0	0	0	0	0	0	0	0.2	0	0	0	0
PSME4	2p16.2	11.4	13.65	12.05	13.58	13.41	11.45	8.56	5.6	3.5	8.16	12.57	14.69	20	4.06	15.11	14.29	3.62	8.85	0.05	0	0.1	0	0	0	0.38	0	0	0	0	0.4	0	0	0	0	0	0
ACYP2	2p16.2	0.83	0.99	1.07	0.66	0.99	0.76	0.38	0	0.39	0.6	0.89	0.6	1.22	0.2	0.64	1.13	0.4	1.32	0.06	0	0	0.33	0.2	0	0	0	0	0	0.18	0	0	0	0.21	0.23	0.2	0
SPTBN1	2p16.2	11.42	15.14	12.54	15.89	14.99	9.41	9.7	5.33	2.33	6.95	13.63	16.5	25.12	2.64	11.7	11.56	1.21	8.29	0.08	0.25	0	0.33	0	0	0	0	0.19	0	0	0.2	0	0.2	0	0	0	0
RTN4	2p16.1	6.73	6.95	6.03	6.62	8.48	4.83	5.32	3.2	0.58	5.14	8.14	9.66	14.39	4.47	7.02	7.26	1.41	4.9	0.05	0	0	0	0.39	0	0	0	0.19	0.3	0	0	0.24	0	0	0	0	0
RPS27A	2p16.1	6.38	9.43	6.8	6.62	6.31	5.85	5.51	4.27	0.78	5.44	5.84	6.64	10.98	2.03	7.45	6.12	2.01	5.08	0.01	0	0	0	0	0.25	0	0	0	0	0	0	0	0	0	0	0	0
MTIF2	2p16.1	6.38	9.43	6.8	6.62	6.31	5.85	5.51	4.27	0.78	5.44	5.84	6.64	10.98	2.03	7.45	6.12	2.01	5.08	0.18	0	0	0	0	0.51	0.57	0.27	0.39	0	0.18	0	0.49	0	0.21	0.23	0.4	0
CCDC88A	2p16.1	7.57	9.43	7.39	8.28	7.3	6.36	6.46	4	2.92	5.44	7.61	8.25	16.1	3.86	7.87	7.48	2.41	6.4	0.01	0	0	0	0	0	0	0	0	0	0	0	0	0	0	0	0	0.19
SMEK2	2p16.1	3.63	3.72	4.08	3.97	4.73	3.31	1.71	2.13	0.39	3.63	2.83	4.43	4.63	3.46	3.62	4.99	0	2.45	0.15	0	0.1	0	0	0	0	0	0.39	0	0.35	0	0.24	0.2	0.64	0	0.2	0.38
PNPT1	2p16.1	9.99	13.15	8.07	10.6	10.45	10.18	7.03	5.6	3.31	6.65	10.97	13.68	20.98	4.06	10.21	11.56	3.02	6.78	0.15	0.25	0.19	0	0.2	0.25	0	0.27	0	0	0	0	0.49	0.2	0	0.23	0.2	0
EFEMP1	2p16.1	4.47	8.44	3.79	2.98	6.31	3.31	3.04	1.87	0.19	4.53	3.89	5.43	8.05	1.42	4.47	4.54	0.8	3.01	0.28	0	0.19	0	0.59	0.25	0	0.27	0.58	0	0.18	0	0.73	0.41	0.21	0.45	0	0.38
VRK2	2p16.1	2.92	4.47	2.92	3.64	2.76	2.54	2.09	1.6	0.78	0.91	2.48	3.62	4.88	0.61	3.83	4.54	0.4	2.26	0.24	0.25	0.29	0	0.2	0	0.19	0.27	0.19	0.91	0.18	0	0	0.61	0	0.23	0	0.19
FANCL	2p16.1	6.21	8.93	6.12	7.62	5.33	5.34	5.13	2.13	1.56	3.63	5.66	10.66	12.93	1.83	7.87	7.71	1.61	4.52	0.08	0.25	0	0	0.2	0	0	0	0	0.3	0.18	0.2	0	0.2	0	0.23	0	0.19
BCL11A	2p16.1	0.47	0.74	0.58	0.33	0	0.25	0.19	0	0.19	0.6	0	0.8	0.98	0	1.28	0.68	0	0.38	0	0	0	0	0	0	0	0	0	0	0	0	0	0	0	0	0	0
PAPOLG	2p16.1	4.05	5.46	5.25	2.98	3.94	3.56	3.42	2.67	0.97	2.42	4.6	4.23	9.02	2.64	3.4	3.4	1.01	1.88	0.02	0	0	0	0	0	0	0	0	0	0	0	0	0	0	0	0	0
REL	2p16.1	3.94	4.71	4.37	3.97	4.54	2.8	3.23	0.53	0	1.81	4.07	4.83	7.07	1.22	3.83	4.08	0.6	3.95	0.02	0	0	0	0	0	0	0	0	0	0	0	0	0	0.21	0	0.2	0
PUS10	2p16.1	4.73	4.47	6.03	6.62	6.71	2.8	3.23	1.33	0.39	3.63	4.42	5.83	9.02	1.02	3.4	3.63	1.01	5.08	0.23	0.99	0	0	0	0	0.57	0	0	0.3	0.18	0	0	0.61	0.21	0.68	0	0.56
PEX13	2p16.1	4.01	4.47	5.34	5.63	5.33	2.54	3.42	1.33	0.78	3.02	2.3	5.43	7.56	0.81	3.83	2.95	0.8	4.52	0.07	0	0.1	0	0.2	0.25	0	0	0	0	0	0	0	0.2	0	0	0	0
KIAA1841	2p16.1	4.35	4.96	5.05	3.97	5.13	2.54	3.99	1.07	0.78	2.11	3.36	5.03	9.27	1.22	4.68	3.4	0.2	3.58	0.06	0.25	0.19	0	0	0	0	0	0	0.3	0	0	0	0	0	0.23	0	0
AHSA2	2p15	3.07	4.22	2.53	3.31	5.33	1.27	2.66	0.53	1.36	2.11	3.01	4.63	4.39	1.22	3.4	3.85	0.2	1.13	0.14	0.25	0.1	0.33	0	0	0	0	0	0	0	0.2	0	0.2	0.85	0.45	0	0.19
XPO1	2p15	3.07	3.97	4.47	3.97	4.73	2.54	1.71	0.8	0	3.32	3.19	3.22	4.39	1.42	2.55	2.72	0.2	2.26	0.06	0	0	0	0.39	0.51	0	0	0	0	0	0	0.24	0	0	0	0.2	0
CCT4	2p15	4.68	5.21	4.96	5.3	6.11	4.83	3.61	3.73	1.75	3.63	4.07	4.63	5.37	2.64	4.68	3.85	2.62	5.27	0.31	0	0.39	0.66	0.2	0.25	0	0	0.19	0.3	0	0.4	0.24	0.41	0	0.45	0.4	0.38
COMMD1	2p15	1.61	1.74	1.26	1.99	1.18	2.54	1.52	1.87	0	0.6	1.06	1.81	4.63	0.2	1.91	1.81	0.2	0.75	0.01	0	0	0.33	0	0	0	0	0	0	0	0	0	0	0	0	0	0
B3GNT2	2p15	0.25	0.5	0.1	0	0.39	0	0.19	0	0	0.3	0.18	0.4	0.24	0	0.64	0.45	0	0	0	0	0	0	0	0	0	0	0	0	0	0	0	0	0	0	0	0
TMEM17	2p15	3.38	2.48	2.43	3.31	3.55	3.56	3.04	1.87	1.36	1.81	3.89	4.83	6.59	0.81	2.77	3.4	2.01	2.07	0.05	0	0	0	0	0	0	0	0	0	0	0	0.24	0.2	0.43	0	0.2	0
EHBP1	2p15	4.72	5.71	4.18	4.97	5.92	3.56	3.04	4	0.39	5.14	4.96	7.24	8.29	1.63	5.32	5.9	1.41	3.77	0.27	0.25	0.29	0	0.2	0.25	0.19	0.27	0.39	0.3	0	0	0.24	1.22	0.64	0.45	0	0.56
OTX1	2p15	1.54	1.74	1.65	2.32	0.59	1.02	0.76	1.87	0.39	2.72	0.71	2.82	2.2	0	2.34	2.27	0.2	0.38	0.08	0	0	0	0.2	0.25	0.19	0.27	0.39	0	0	0	0	0.2	0	0	0	0
MDH1	2p15	0.63	0.5	0.68	0.66	0.79	0.25	0.38	0.27	0	0.6	0.89	1.01	1.71	0.61	1.06	0.68	0	0	0.09	0	0.1	0	0	0.25	0.19	0.27	0	0	0.18	0	0.49	0	0.21	0	0	0
UGP2	2p15	5.04	6.45	4.57	5.3	6.9	5.09	2.47	2.67	1.36	4.23	4.6	8.25	10.98	1.02	5.32	4.54	1.41	4.14	0.02	0.25	0.1	0	0	0	0	0	0	0	0	0	0	0	0	0	0	0
VPS54	2p14	4.86	2.98	5.54	7.95	7.3	3.82	2.85	2.67	1.17	5.14	4.78	5.63	7.07	1.42	3.4	4.54	1.21	4.33	0	0	0	0	0	0	0	0	0	0	0	0	0	0	0	0	0	0
PELI1	2p14	4.06	5.21	4.57	5.96	4.14	2.29	2.66	1.07	0.39	3.02	4.25	4.63	7.32	0.61	5.11	3.63	0.4	4.14	0.03	0	0	0.33	0	0	0	0	0	0.3	0	0	0	0	0.21	0	0	0
AFTPH	2p14	4.69	4.96	3.98	8.61	5.33	5.09	4.75	0.8	0.58	3.63	3.72	6.24	8.05	1.02	5.74	5.67	1.21	3.01	0	0	0	0	0	0	0	0	0	0	0	0	0	0	0	0	0	0
SERTAD2	2p14	0.25	0.5	0.29	0.33	0.59	0.25	0.19	0	0	0	0	0	1.22	0.2	0	0.23	0	0.19	0	0	0	0	0	0	0	0	0	0	0	0	0	0	0	0	0	0
SLC1A4	2p14	4.98	6.2	3.69	5.3	6.71	3.82	3.99	2.4	0.58	3.02	4.96	5.03	10.73	1.02	6.17	6.8	1.61	3.95	0.22	0	0.29	0.66	0.59	0.25	0	0	0	0.91	0	0	0.24	0	0.43	0	0.2	0.56
CEP68	2p14	5.61	8.44	5.64	5.3	8.09	5.34	3.42	2.67	0.78	3.32	4.6	8.65	10.98	2.03	7.02	5.67	0.4	4.33	0.1	0	0.1	0	0	0	0	0	0.19	0	0	0	0.49	0	0	0.23	0.2	0.19
ACTR2	2p14	2.92	5.21	2.72	2.98	2.17	2.8	2.28	0.8	1.36	2.72	3.54	3.62	4.15	0.81	2.34	3.17	1.21	2.26	0.02	0	0	0	0	0	0	0	0	0	0.18	0	0	0	0	0	0	0.19
SPRED2	2p14	2.77	2.23	3.01	3.64	4.14	3.05	1.14	0.8	0.19	1.21	1.24	2.21	5.37	0.61	2.77	2.95	0.2	2.45	0.1	0	0.1	0	0	0.25	0.19	0	0	0.3	0.18	0	0	0	0	0.23	0	0.19
ETAA1	2p14	7.04	7.69	7.29	9.27	9.27	6.62	6.08	1.87	1.36	4.23	7.08	7.44	12.2	3.05	8.51	7.94	2.82	4.9	0.04	0	0	0	0.2	0	0	0	0.19	0	0	0.4	0	0	0	0	0	0
C1D	2p14	1.15	0.25	1.94	1.66	0.59	0.25	0.19	0	0.19	1.51	0.53	0.8	2.93	0.41	0.21	0.91	0.4	1.69	0.01	0	0	0	0	0	0	0	0.19	0	0	0	0	0	0	0	0	0
WDR92	2p14	8.47	12.16	7.58	7.95	10.45	9.41	6.46	3.47	2.14	6.04	8.14	10.26	16.1	2.24	9.15	11.79	1.81	7.16	0.09	0.25	0.29	0	0.2	0.25	0	0	0	0	0.18	0	0	0.2	0	0	0	0
PNO1	2p14	8.47	12.16	7.58	7.95	10.45	9.41	6.46	3.47	2.14	6.04	8.14	10.26	16.1	2.24	9.15	11.79	1.81	7.16	0.04	0	0.1	0	0.2	0.25	0	0.27	0	0	0	0	0	0	0	0	0	0
CNRIP1	2p14	0.23	0.5	0.29	0.33	0.39	0.51	0	0	0.19	0.3	0.35	0.4	0.24	0	0	0.23	0	0.19	0	0	0	0	0	0	0	0	0	0	0	0	0	0	0	0	0	0
PLEK	2p14	8.84	12.66	8.45	8.61	11.44	6.87	6.46	3.47	2.53	8.16	8.85	12.68	15.37	3.05	10.64	9.98	1.21	5.84	0.05	0	0	0.33	0.2	0	0	0	0.19	0	0	0	0	0	0	0.23	0.2	0
APLF	2p13.3	4.16	5.46	3.98	3.31	4.54	4.33	4.18	2.13	1.36	2.42	3.01	6.04	8.29	2.24	4.04	4.54	0.4	3.77	0.16	0	0.29	0	0.2	0.51	0	0	0	0	0	0.2	0	0	0.21	0	0	0.56
ARHGAP25	2p13.3	7.85	12.41	7.48	9.6	8.68	6.11	7.22	2.67	1.36	7.25	7.43	9.05	12.93	2.44	7.02	9.98	0.4	6.03	0	0	0	0	0	0	0	0	0	0	0	0	0	0	0	0	0	0
FBXO48	2p13.3	1.22	1.99	1.75	1.99	0.99	0.76	1.52	0.53	0	1.51	0.35	2.01	1.95	0.81	0.43	0.91	0	1.32	0.02	0	0	0	0	0	0.19	0	0	0	0	0	0	0.2	0	0	0	0
PROKR1	2p13.3	3.48	5.46	3.4	2.32	4.14	5.09	2.66	1.33	0.58	1.81	2.83	4.63	6.34	1.02	3.62	4.76	0.6	3.01	0.08	0	0	0.33	0	0	0	0	0	0.91	0	0.2	0	0	0	0.23	0.4	0
BMP10	2p13.3	4.71	7.94	4.08	3.64	4.14	3.82	4.37	1.33	0.78	4.23	4.96	5.63	7.8	0.61	5.74	6.58	0.2	3.2	0.05	0	0.19	0	0.2	0	0	0	0	0	0	0	0	0	0	0	0.2	0
GKN2	2p13.3	2.2	4.71	2.14	3.31	2.56	1.53	0.95	1.33	0	1.21	0.89	2.41	4.15	1.02	2.34	3.4	0.2	2.45	0.14	0	0.19	0.33	0.39	0	0	0	0	0.3	0	0.4	0	0	0	0	0.2	0.19
GKN1	2p13.3	1.67	1.99	1.36	2.32	2.17	1.27	1.33	0.8	0	1.81	1.42	2.41	2.2	0.61	1.7	1.13	0	1.69	0.1	0	0.1	0.33	0	0	0	0.53	0	0	0.35	0.2	0	0	0	0	0	0
ANTXR1	2p13.3	5.96	8.93	6.51	9.27	7.1	3.82	3.23	2.13	1.17	5.74	5.49	5.23	10.49	1.83	6.81	5.9	0.6	4.14	0.28	0	0.49	0.66	0	0.25	0.38	0.27	0.58	0	0.53	0.2	0.24	0	0.85	0	0	0.38
GFPT1	2p13.3	5.56	9.18	5.15	6.95	5.33	4.58	4.56	2.4	1.17	4.23	4.78	7.24	10.24	2.24	5.11	8.39	1.41	4.14	0.04	0	0	0	0	0	0.19	0	0	0	0.18	0	0	0.2	0	0.23	0	0
NFU1	2p13.3	3.15	4.47	3.5	1.32	4.34	2.8	1.9	1.33	0.78	2.42	2.65	4.02	6.1	1.22	1.49	4.76	1.01	2.45	0.1	0	0.19	0	0	0.25	0	0	0	0.3	0	0.4	0	0	0	0	0	0.19
ANXA4	2p13.3	4.69	4.96	6.22	4.64	4.73	3.56	2.47	2.67	1.36	3.32	3.54	3.82	5.61	2.03	4.47	7.26	0.2	5.08	0.02	0	0	0	0	0	0	0	0	0	0	0	0	0	0.21	0.23	0	0
GMCL1	2p13.3	5.93	5.46	8.16	7.28	6.11	5.6	3.99	3.2	0.97	6.04	4.96	5.23	7.8	2.85	4.47	7.71	1.01	4.71	0.04	0	0.1	0	0	0	0.19	0	0	0	0	0	0.24	0	0	0	0	0
SNRNP27	2p13.3	2.7	1.99	4.37	2.98	3.75	1.53	1.71	1.07	0.19	3.63	2.3	2.62	4.15	0.81	1.28	2.72	0.6	1.51	0.02	0	0	0	0	0	0	0	0.19	0	0	0	0	0	0	0	0	0.19
MXD1	2p13.3	3.36	4.96	3.21	3.31	3.75	2.8	3.04	1.6	0.97	1.51	3.19	4.02	4.88	1.83	2.34	4.31	0.6	3.01	0.02	0	0.1	0	0	0	0	0	0	0	0	0	0	0	0	0.23	0	0
ASPRV1	2p13.3	3.34	4.71	3.21	3.31	3.75	2.8	3.04	1.6	0.97	1.51	3.19	4.02	4.88	1.83	2.34	4.31	0.6	3.01	0.01	0	0	0	0	0	0	0	0.19	0	0	0	0	0	0	0	0	0
PCBP1	2p13.3	0.17	0	0	0	0.2	0.25	0	0.27	0	0.6	0.35	0.2	0	0	0	0.23	0	0	0	0	0	0	0	0	0	0	0	0	0	0	0	0	0	0	0	0
C2orf42	2p13.3	2.11	3.47	2.04	2.98	2.76	2.29	2.09	1.6	0	1.51	1.59	2.41	3.9	0.61	2.34	2.27	0.4	1.88	0.29	0.25	0.39	0.33	0.2	0.51	0.19	0	0.19	0.3	0.35	0.2	0.49	0.2	0.43	0.23	0.2	0.38
TIA1	2p13.3	3.77	6.2	4.37	4.3	5.33	3.05	3.23	1.87	0.58	3.02	4.25	3.22	8.05	1.22	3.62	4.08	1.01	3.01	0.02	0	0.1	0	0	0	0	0	0	0	0.18	0	0	0	0	0	0	0
PCYOX1	2p13.3	5.04	6.95	5.25	4.64	7.3	4.33	3.8	2.93	0.58	4.23	5.66	5.23	9.51	2.03	4.26	5.9	0.8	3.77	0.16	0	0.39	0	0.39	0	0	0.53	0	0	0.35	0	0	0.41	0.43	0	0.2	0
SNRPG	2p13.3	4.76	6.45	4.76	4.3	7.1	4.33	3.42	2.67	0.19	3.93	4.96	4.63	9.51	2.03	4.26	5.44	0.8	3.39	0	0	0	0	0	0	0	0	0	0	0	0	0	0	0	0	0	0
FAM136A	2p13.3	4.76	6.45	4.76	4.3	7.1	4.33	3.42	2.67	0.19	3.93	4.96	4.63	9.51	2.03	4.26	5.44	0.8	3.39	0.09	0	0	0	0	0	0	0.27	0.19	0	0	0	0.24	0.2	0.21	0	0	0.56
TGFA	2p13.3	2.77	3.47	2.43	4.3	2.96	5.09	1.9	1.87	0.39	2.11	1.42	2.21	5.61	1.22	3.19	3.63	1.61	1.88	0	0	0	0	0	0	0	0	0	0	0	0	0	0	0	0	0	0
ADD2	2p13.3	6.12	6.7	7.29	6.29	6.71	5.34	5.89	2.67	2.33	4.23	6.55	5.23	10.98	2.24	4.26	7.03	0.8	3.58	0.05	0	0.1	0	0.2	0	0.19	0	0	0.3	0	0.2	0	0	0	0	0	0
CLEC4F	2p13.3	5.04	6.45	5.54	4.97	5.72	3.31	4.18	1.87	2.14	3.02	5.84	6.24	10.49	1.22	4.89	5.67	0.6	3.58	0.09	0	0	0	0	0	0	0	0.39	0	0	0	0.49	0.2	0	0.45	0	0.19
VAX2	2p13.3	8.52	12.66	8.94	7.95	8.48	5.85	6.27	3.73	1.95	6.65	9.38	11.87	12.68	3.66	7.87	11.34	2.82	7.34	0.18	0.25	0.1	0	0.39	0	0	0	0.58	0.3	0	0.4	0	0.41	0.21	0	0	0
ATP6V1B1	2p13.3	11.38	14.89	12.24	12.25	12.43	8.4	9.32	4.8	2.53	9.06	12.74	14.29	19.27	5.49	11.06	13.83	2.82	10.92	0.66	0.74	0.19	0	0.79	0.76	0	1.07	0.78	0.6	0.71	1.01	0.24	1.42	1.06	1.36	0.4	0.38
ANKRD53	2p13.3	11.38	14.89	12.24	12.25	12.43	8.4	9.32	4.8	2.53	9.06	12.74	14.29	19.27	5.49	11.06	13.83	2.82	10.92	0.06	0.25	0.1	0.33	0	0.25	0.19	0	0.19	0	0	0	0	0	0	0	0	0
TEX261	2p13.3	8.27	11.41	9.23	8.61	9.47	5.34	7.41	4.27	1.56	6.65	9.73	9.46	14.15	3.66	7.87	10.66	1.41	8.1	0.03	0	0	0	0	0	0	0	0	0	0.18	0	0	0	0.21	0	0	0
MCEE	2p13.3	10.34	11.66	9.62	12.58	13.41	8.91	10.08	5.07	3.31	9.06	10.09	10.06	19.02	5.08	11.28	12.47	1.41	6.59	0.28	0.25	0.49	0.66	0.2	0.51	0	0	0.19	0.3	0	0	0.24	0.2	0.21	0	0.2	0.19
MPHOSPH10	2p13.3	10.34	11.66	9.62	12.58	13.41	8.91	10.08	5.07	3.31	9.06	10.09	10.06	19.02	5.08	11.28	12.47	1.41	6.59	0.04	0.25	0	0	0	0	0.19	0	0	0.6	0	0	0	0	0	0	0	0
ZNF638	2p13.2	9.5	14.89	9.52	9.6	10.65	9.41	7.41	4.8	1.56	8.16	9.38	10.66	16.83	3.66	10.21	10.66	2.62	6.59	0.13	0	0.1	0	0	0.25	0.38	0.27	0.19	0	0.35	0.2	0	0.2	0	0.23	0.2	0
DYSF	2p13.2	15.7	21.34	15.06	15.89	18.93	16.03	15.97	7.2	5.45	11.48	15.93	20.12	24.88	6.5	16.38	15.87	4.23	11.86	2.37	3.23	1.65	1.66	0.99	4.07	1.71	2.67	3.89	2.11	2.48	3.02	3.17	3.25	0.85	2.27	3.02	2.64
CYP26B1	2p13.2	1.7	2.98	1.26	1.32	2.56	0.51	1.33	0.8	0.58	2.11	1.77	1.21	2.68	1.02	2.34	1.36	0.4	1.32	0.07	0	0	0.33	0	0	0.19	0.27	0	0	0	0	0.24	0.2	0	0.23	0	0
SPR	2p13.2	0.12	0.5	0.1	0	0.2	0	0.19	0	0	0	0.35	0	0.24	0.2	0	0	0.2	0	0.16	0.25	0.19	0	0.39	0	0.19	0	0	0.3	0	0.2	0.49	0	0.21	0	0.2	0.19
SFXN5	2p13.2	4.11	3.72	4.47	6.62	4.14	5.6	3.23	1.07	1.36	3.63	4.78	4.43	4.39	2.03	2.34	7.26	1.21	2.64	0.04	0	0	0	0	0.25	0.19	0	0.19	0	0	0	0	0	0	0	0.2	0
RAB11FIP5	2p13.2	2.35	1.99	2.24	3.64	2.76	2.54	0.95	0.53	0.58	1.81	2.48	2.62	2.68	1.02	2.55	4.08	0.6	0.94	0.01	0	0	0	0	0	0	0	0.19	0	0	0	0	0	0	0	0	0
SMYD5	2p13.2	5.1	7.94	4.28	5.3	6.51	4.58	4.75	3.2	1.75	4.53	5.13	4.43	9.27	1.42	4.47	5.9	1.01	3.01	0.06	0	0.1	0	0.2	0.25	0	0	0.19	0	0	0	0	0	0	0	0	0
NAT8	2p13.1	2.43	2.98	3.11	1.99	2.76	1.53	1.33	1.07	0.19	0.6	3.89	2.21	3.9	1.22	2.55	4.54	0.2	2.26	0.03	0	0	0	0	0.51	0	0	0	0	0	0	0	0	0	0	0	0
TPRKB	2p13.1	4.59	4.96	5.15	4.97	4.14	3.82	3.42	1.6	0.58	3.93	5.13	3.82	5.12	2.44	4.68	6.12	1.41	4.33	0.01	0	0	0	0	0	0	0	0	0	0	0.2	0	0	0	0	0	0
DUSP11	2p13.1	4.59	4.96	5.15	4.97	4.14	3.82	3.42	1.6	0.58	3.93	5.13	3.82	5.12	2.44	4.68	6.12	1.41	4.33	0.1	0	0.1	0	0.2	0.25	0.19	0	0.19	0.6	0	0	0	0	0.21	0	0	0
STAMBP	2p13.1	3.5	4.96	3.4	2.65	4.34	2.8	3.23	1.87	0.39	2.72	4.07	3.42	4.63	1.02	4.04	3.85	0.4	2.26	0.03	0	0	0	0	0	0	0	0	0	0.18	0	0.24	0	0.21	0	0	0
ACTG2	2p13.1	11.55	16.13	11.47	12.25	15.38	8.65	8.75	5.33	3.7	8.16	12.74	13.48	16.59	5.89	12.55	13.61	5.23	7.34	0.13	0	0.19	0	0	0.51	0	0	0.19	0	0	0.2	0.24	0	0	0.23	0.4	0
DGUOK	2p13.1	9.95	14.14	10.2	11.26	12.82	6.87	7.41	4	3.31	7.25	11.33	11.87	14.39	5.69	10.43	11.11	4.83	6.59	0.45	0.5	0.68	0.33	0.59	0.76	0.57	0.27	0.19	0.91	0	0.6	0	0.2	0.43	1.13	0	0.75
BOLA3	2p13.1	0.14	0.25	0.29	0	0	0.76	0.19	0.27	0	0	0	0	0.24	0	0	0	0	0.19	0.03	0	0	0	0	0	0	0	0	0	0	0	0	0	0.21	0	0.2	0.19
SLC4A5	2p13.1	8.8	10.17	8.45	10.26	12.03	9.67	6.65	4.53	0.58	7.85	9.73	10.26	14.39	4.06	7.66	8.62	1.81	6.97	0.93	0.74	0.58	0	1.18	1.78	0.95	2.13	0.78	1.51	1.24	0.8	0.73	1.22	0.85	0.23	1.21	0.75
DCTN1	2p13.1	3.92	6.45	3.6	4.3	5.52	3.31	2.85	1.6	0.58	4.83	3.54	3.42	6.34	1.83	4.89	3.85	1.21	3.77	0.53	0.25	0.58	0.66	0.99	1.02	0.38	1.33	0.39	0	0.35	0.4	0.73	0	0.64	0	0.6	0.75
WDR54	2p13.1	4.35	7.44	4.76	5.3	4.73	3.31	3.42	1.87	1.17	5.74	3.72	2.62	6.83	1.83	4.47	5.9	0.2	4.14	0.02	0	0.1	0	0	0	0	0	0	0	0	0	0	0	0.21	0	0	0
RTKN	2p13.1	4	6.7	4.37	4.97	4.14	3.05	3.04	1.6	1.17	4.53	4.07	3.02	5.85	1.42	4.47	4.99	0.4	3.01	0.03	0	0	0	0	0	0.19	0	0	0	0	0	0	0.2	0	0	0	0
INO80B	2p13.1	4.15	6.95	4.47	4.97	4.34	3.05	3.23	1.6	1.36	4.53	4.07	3.42	6.34	1.42	4.47	4.99	0.6	3.39	0.01	0	0	0	0	0	0.19	0	0	0	0	0	0	0	0	0	0	0
WBP1	2p13.1	5.02	8.19	5.05	6.29	5.72	3.82	3.23	1.87	1.36	4.83	4.6	5.43	7.8	1.83	5.74	5.67	0.8	3.95	0.02	0	0	0	0	0	0	0	0	0	0	0.2	0	0	0	0	0	0
CCDC142	2p13.1	5.56	9.43	5.34	7.95	6.11	3.31	3.42	2.4	1.36	4.53	4.96	5.83	9.02	2.03	7.02	6.35	1.01	5.08	0.06	0	0	0	0	0	0.19	0	0	0	0	0.2	0	0	0.21	0	0.2	0.19
MRPL53	2p13.1	5.72	9.93	5.73	7.28	6.11	3.82	3.42	2.13	1.36	4.83	5.31	5.83	9.76	2.03	7.02	6.35	1.01	4.9	0	0	0	0	0	0	0	0	0	0	0	0	0	0	0	0	0	0
LBX2	2p13.1	6.99	11.41	6.51	9.93	7.5	5.6	4.56	2.4	0.78	7.25	6.55	7.04	11.71	2.24	8.51	8.39	1.81	6.21	0.08	0	0	0	0	0	0.19	0.27	0	0.3	0.35	0	0	0	0.43	0	0	0
PCGF1	2p13.1	6.95	10.92	7	9.27	7.5	5.85	4.56	3.47	0.78	6.34	7.08	6.44	11.46	2.85	7.66	8.62	1.61	6.21	0	0	0	0	0	0	0	0	0	0	0	0	0	0	0	0	0	0
TLX2	2p13.1	6.46	9.93	6.51	9.6	6.51	5.34	4.18	3.2	0.39	6.34	6.73	6.24	10.49	2.44	7.23	6.58	2.01	5.46	0	0	0	0	0	0	0	0	0	0	0	0	0	0	0	0	0	0
DQX1	2p13.1	6.46	9.93	6.51	9.6	6.51	5.34	4.18	3.2	0.39	6.34	6.73	6.24	10.49	2.44	7.23	6.58	2.01	5.46	0.2	0.25	0.1	0.66	0	0.25	0.19	0.27	0	0.6	0	0	0.73	0	0.21	0	0.2	0.94
HTRA2	2p13.1	4.63	7.2	5.05	7.62	4.93	4.33	3.61	2.67	0	4.23	5.13	3.42	7.32	1.63	4.47	5.22	1.21	3.39	0.04	0	0	0.33	0	0	0	0	0.19	0	0	0	0	0	0	0	0.2	0
LOXL3	2p13.1	5.61	8.44	5.83	8.61	6.11	5.09	3.8	2.93	0.19	5.14	5.84	5.63	8.78	2.03	6.17	5.9	1.61	4.14	0.04	0	0	0	0	0	0	0	0	0	0	0	0	0.2	0	0	0	0.56
DOK1	2p13.1	5.59	8.44	5.83	8.61	5.92	5.09	3.8	2.93	0.19	5.14	5.84	5.63	8.78	2.03	6.17	5.9	1.61	4.14	0.03	0	0	0	0	0	0	0	0	0	0	0	0.24	0.2	0	0	0	0.19
SEMA4F	2p13.1	3.69	4.96	4.37	5.3	4.93	2.8	2.85	2.4	0.58	3.02	3.89	3.22	5.37	1.63	4.68	5.44	0.4	2.64	0.06	0	0	0	0	0.25	0	0	0.39	0	0	0.2	0	0	0.43	0	0	0
HK2	2p12	9.08	13.9	7.97	11.59	10.45	7.12	8.75	4.53	2.33	8.16	9.03	9.66	14.39	3.46	12.13	10.43	2.62	6.59	0.85	0.99	1.55	1.32	1.18	1.02	0.95	0.53	0.97	0	0.53	0.2	0.24	1.42	1.06	1.59	0.6	0.56
POLE4	2p12	0.54	0.25	0.58	0.66	0.79	0.25	0.19	0.27	0	0	0.89	0.4	0.98	0	0.64	0.23	0	0.19	0	0	0	0	0	0	0	0	0	0	0	0	0	0	0	0	0	0
TACR1	2p12	4.45	6.2	4.28	2.98	4.34	3.05	2.28	2.67	0.97	3.63	3.72	5.83	7.56	1.22	7.23	6.35	0.2	2.26	0.07	0	0.1	0	0.2	0	0.19	0	0	0	0	0	0.24	0	0	0	0.2	0
REG1A	2p12	1.83	2.98	1.26	1.99	2.76	0.76	1.71	1.33	0.39	0.6	1.59	3.42	3.41	0.2	0.64	1.81	0.4	1.51	0	0	0	0	0	0	0	0	0	0	0	0	0	0	0	0	0	0
REG1B	2p12	5.15	6.2	5.05	2.32	5.52	3.31	2.85	1.87	1.17	3.63	5.84	5.43	10.24	1.42	5.96	6.8	1.21	4.33	0.05	0	0	0	0	0	0	0	0.19	0	0	0	0	0	0	0.23	0.4	0
REG3A	2p12	1.83	2.98	1.26	1.99	2.76	0.76	1.71	1.33	0.39	0.6	1.59	3.42	3.41	0.2	0.64	1.81	0.4	1.51	0.03	0	0	0	0	0	0	0	0	0.3	0	0	0	0	0	0	0	0
REG3G	2p12	6.72	6.95	6.71	7.28	5.52	7.12	4.56	4	2.33	3.93	7.61	8.45	12.2	3.86	7.02	8.39	2.21	3.95	0.07	0.25	0	0	0	0	0	0	0	0	0.35	0	0.24	0	0	0	0	0.38
LRRTM1	2p12	0.31	0	0.39	0	0.39	0.25	0.19	0	0.19	0	0.35	0.6	0	0	0.64	0.68	0	0.56	0.04	0	0	0	0.2	0	0.19	0	0	0	0.18	0	0.24	0	0	0	0	0
SUCLG1	2p11.2	0.74	1.24	0.58	1.66	0.79	0.76	0.95	0.27	0.19	1.21	0.18	0.8	1.22	0.2	1.06	0.68	0	0.75	0.41	0.99	0.68	0.33	0.2	0.25	0.38	0.53	0.58	0.3	0.35	0.4	0.49	0.2	0.85	0	0.4	0.19
DNAH6	2p11.2	1.11	0.99	1.36	1.66	0.99	1.27	0.95	0.8	0	0.3	1.24	1.21	1.46	0	1.06	0.91	0.2	1.88	0.05	0	0	0	0	0	0	0	0.19	0.3	0	0	0.24	0.2	0	0	0	0.19
TMSB10	2p11.2	0.74	1.24	0.58	0.66	0.79	1.78	0.57	0.53	0.19	0	0.35	1.41	0.98	0.2	1.28	0.68	0	0.94	0.02	0	0	0	0	0.25	0	0	0	0	0	0.2	0	0	0	0	0	0
TCF7L1	2p11.2	0.8	1.74	0.78	2.32	1.18	0.25	0.19	0.53	0	0.3	0.53	0.2	0.49	0.81	0.85	0.68	0	0.75	0.34	0.5	0.19	0.66	0	0.51	0.38	0.53	0.58	0.3	0.53	0.4	0	0.41	0.64	0.23	0.4	0.19
RETSAT	2p11.2	9.33	11.66	10.2	10.26	8.68	9.41	7.22	3.73	2.72	5.74	11.15	9.66	15.85	4.27	10.64	9.98	2.62	6.4	0.55	1.24	0.68	0.33	0.2	1.02	0.95	0.27	0.19	0.3	0.71	0.4	0.24	0.61	0.64	0.68	0	0.38
ELMOD3	2p11.2	9.88	12.66	11.08	9.6	9.47	9.67	7.22	4.53	3.7	5.74	12.21	10.26	17.8	3.86	10.85	9.98	2.82	7.16	0.06	0	0.1	0	0	0	0	0	0	0	0.18	0	0	0	0	0	0.2	0.19
CAPG	2p11.2	8.77	12.41	9.52	7.95	8.09	9.16	6.46	3.73	2.72	6.34	10.27	9.26	15.85	2.85	11.49	9.07	2.82	5.46	0.04	0	0	0	0.2	0	0	0	0.19	0	0	0	0	0	0	0	0.2	0
SH2D6	2p11.2	8.11	10.92	8.94	7.95	7.1	8.65	5.89	2.93	2.53	5.74	9.38	8.85	14.63	2.64	11.06	8.62	2.62	5.27	0.23	0.5	0.19	0.33	0	0.51	0.76	0	0.39	0.3	0	0	0	0	0.21	0.45	0	0
MAT2A	2p11.2	11.76	13.9	13.31	14.9	13.41	12.21	9.13	5.07	2.14	10.88	9.73	13.68	23.66	3.05	13.62	13.38	3.02	8.85	0.07	0.25	0	0	0.2	0.25	0.19	0	0.19	0	0	0.2	0	0	0	0	0	0.19
GGCX	2p11.2	14.42	17.62	16.33	18.87	17.36	17.56	11.22	6.93	2.72	11.78	12.92	16.9	28.05	5.49	15.74	16.55	3.62	12.05	0.66	0.74	0.39	0.33	0.39	0.25	0.38	1.07	1.36	1.51	0.71	0.4	0.49	0.61	1.06	1.13	0.2	0.75
VAMP8	2p11.2	13.45	17.62	14.97	16.89	15.58	16.03	10.65	6.13	2.14	11.48	12.21	14.89	25.85	4.88	15.32	15.42	3.02	11.3	0	0	0	0	0	0	0	0	0	0	0	0	0	0	0	0	0	0
VAMP5	2p11.2	13.76	17.37	15.26	17.22	17.16	15.78	10.65	6.13	2.72	11.78	12.57	15.9	27.8	4.88	14.89	16.33	2.82	12.62	0.07	0.25	0	0	0.2	0	0	0	0	0	0	0.2	0.73	0.2	0	0	0	0
RNF181	2p11.2	13.61	16.87	15.26	17.55	16.57	15.78	10.84	6.93	2.72	12.08	12.04	15.69	26.1	4.67	14.68	15.42	3.22	12.05	0.12	0.25	0.1	0	0	0.51	0.38	0	0	0	0.35	0.2	0	0	0	0.23	0.2	0.19
TMEM150A	2p11.2	12.78	16.38	14.19	16.23	15.38	14.76	10.08	5.87	2.33	10.88	11.33	14.69	25.37	4.27	14.04	15.19	2.62	11.3	0	0	0	0	0	0	0	0	0	0	0	0	0	0	0	0	0	0
USP39	2p11.2	9.79	13.4	10.3	13.25	10.45	12.21	7.41	5.07	2.33	8.46	8.67	10.66	16.83	3.66	10.85	12.7	2.41	8.85	0.07	0	0.19	0.33	0	0	0	0.27	0.39	0	0	0	0	0	0	0	0.2	0
GNLY	2p11.2	5.78	7.44	5.54	5.3	5.52	9.16	3.8	2.67	1.36	5.74	5.84	6.04	9.02	1.22	8.09	6.8	1.61	3.58	0	0	0	0	0	0	0	0	0	0	0	0	0	0	0	0	0	0
ATOH8	2p11.2	0.1	0.25	0.58	0.33	0	0	0.38	0	0	0	0	0	0	0	0	0	0	0	0.04	0.25	0	0	0.2	0	0	0	0.19	0	0	0	0	0.2	0	0	0	0
ST3GAL5	2p11.2	2.79	4.22	2.53	3.64	3.16	2.29	3.04	0.8	0.58	2.42	3.72	3.22	3.9	0.81	3.4	2.04	0.8	1.13	0.07	0	0.19	0.33	0	0	0	0	0	0	0	0.2	0	0	0	0	0	0.19
MRPL35	2p11.2	6.43	7.69	5.44	9.6	8.09	5.85	5.51	3.2	0	4.83	5.66	8.05	10.49	2.24	10.43	7.94	0.8	4.71	0.01	0	0	0	0.2	0	0	0	0	0	0	0	0	0	0	0	0	0
PTCD3	2p11.2	4.21	7.2	4.47	6.62	5.92	2.8	3.8	2.4	1.17	4.23	4.07	5.83	5.61	1.02	4.04	5.22	1.41	2.82	0.1	0	0.1	0	0	0	0	0	0.58	0.3	0	0	0.24	0	0.21	0	0	0.38
REEP1	2p11.2	5.6	6.7	6.22	10.26	5.13	4.58	4.37	2.67	0.39	4.53	4.78	6.64	8.29	1.42	8.94	6.35	0.8	4.52	0.08	0	0	0	0	0	0	0	0	0.3	0.18	0	0.24	0	0.43	0	0.2	0.19
KDM3A	2p11.2	7.45	10.67	7.68	9.6	8.09	6.36	8.56	4	1.95	3.93	8.85	10.26	10.24	3.05	7.02	7.71	2.41	4.9	0.05	0	0	0	0.39	0	0	0	0	0	0.18	0	0	0	0	0	0.2	0
RNF103	2p11.2	0.48	0.74	0.78	0.66	0.39	0.25	0.19	0.27	0.19	0	0.35	0	0.24	0.2	0.64	0.45	0	0.94	0	0	0	0	0	0	0	0	0	0	0	0	0	0	0	0	0	0
RMND5A	2p11.2	5.76	7.44	5.15	4.64	7.89	6.36	3.99	5.07	0.78	2.11	5.13	9.26	9.02	2.03	8.94	6.12	1.81	3.2	0	0	0	0	0	0	0	0	0	0	0	0	0	0	0	0	0	0
CD8A	2p11.2	6.9	8.44	7	5.96	9.47	6.36	4.94	5.6	0.78	3.32	6.73	9.66	10.49	2.03	9.79	6.58	1.81	4.33	0.09	0	0.1	0	0	0.25	0	0.53	0	0	0	0	0	0.2	0.21	0.23	0	0
CD8B	2p11.2	3.01	3.47	4.08	2.65	2.96	1.78	1.71	2.4	0.39	1.81	3.54	3.42	5.37	1.02	2.34	2.49	0.2	2.64	0	0	0	0	0	0	0	0	0	0	0	0	0	0	0	0	0	0
KRCC1	2p11.2	3.32	4.71	3.6	4.64	4.54	4.33	3.04	1.33	0.97	3.02	2.83	3.02	2.93	1.83	2.55	3.4	0.8	2.26	0.02	0	0	0	0	0	0	0.27	0	0	0.18	0	0	0	0	0	0	0
SMYD1	2p11.2	10.03	15.63	11.66	11.26	9.86	11.96	9.51	4	2.53	7.25	10.27	11.27	14.15	3.46	11.91	9.98	2.21	7.34	0.12	0.25	0.1	0	0	0	0.19	0.27	0	0	0.35	0.2	0	0	0	0.45	0.2	0
FABP1	2p11.2	11.19	18.11	12.54	12.91	10.65	14.25	9.89	5.33	2.92	8.76	11.5	12.27	17.32	3.66	12.55	11.34	2.21	7.72	0	0	0	0	0	0	0	0	0	0	0	0	0	0	0	0	0	0
THNSL2	2p11.2	3.69	5.46	3.11	4.3	4.34	5.34	3.61	2.93	0.78	3.93	3.36	3.22	6.34	1.02	3.83	4.54	0.2	2.26	0.18	0	0.29	0.33	0	0.25	0.38	0.27	0.58	0	0	0	0	0.2	0	0.23	0.2	0.56
EIF2AK3	2p11.2	7.93	12.66	6.12	7.28	10.45	6.87	5.89	3.47	1.17	7.25	8.67	9.46	14.88	1.83	8.3	10.2	1.81	5.65	0.04	0.25	0	0	0	0	0	0	0	0.3	0.18	0.2	0	0	0	0	0	0
TEKT4	2q11.1	0.72	1.24	0.87	1.66	0.59	0.51	0.95	0	0.19	0	1.06	0.6	0.98	0.61	0.43	0.91	0.4	0.75	0.03	0	0	0	0	0	0	0	0	0	0.18	0	0	0	0	0	0	0.38
MAL	2q11.1	0.17	0.25	0.19	0	0.39	0.25	0	0	0	0.3	0.35	0	0.24	0	0.21	0.23	0	0.38	0.06	0	0	0	0	0	0.19	0.27	0	0.3	0	0	0.24	0	0	0	0	0
MRPS5	2q11.1	1.65	4.71	1.55	1.32	1.78	2.54	1.71	0.53	0.58	1.51	1.77	2.01	2.44	0.2	1.06	1.59	0.2	0.56	0.04	0.25	0	0	0	0	0	0.27	0.19	0	0.18	0	0	0	0	0	0	0
ZNF514	2q11.1	1.11	4.47	0.97	0.99	1.38	1.78	0.76	0.27	0.19	0.91	0.89	1.01	1.71	0.2	0.85	1.13	0	0.38	0.06	0.25	0.1	0	0	0	0.19	0	0	0	0	0	0	0	0	0	0.4	0
PROM2	2q11.1	5.38	8.44	5.64	5.3	4.73	6.36	4.56	2.93	0.97	6.95	4.42	5.23	6.59	1.63	5.32	6.8	0.6	4.14	0.03	0	0	0	0.2	0	0.19	0	0	0	0	0.2	0	0	0	0	0	0
KCNIP3	2q11.1	0.3	0.5	0.49	0.99	0.39	0.51	0	0.27	0	0	0	0.2	0.24	0.2	0.64	0.23	0.4	0.19	0.07	0	0	0	0	0	0.38	0	0.19	0	0.18	0.2	0	0.2	0	0	0	0
FAHD2A	2q11.1	0.77	1.74	0.97	0.99	0.59	0.51	0.76	0.53	0	0	0.53	0.8	2.2	0.2	0.85	0.45	0.2	0.38	0.21	0	0.29	0.33	0	0.51	0	0.27	0.19	0	0.18	0.2	0.73	0	0.43	0	0.8	0.19
TRIM43	2q11.1	0.07	0	0.1	0.66	0	0	0	0	0	0	0	0	0	0	0	0.23	0	0.19	0.02	0	0	0.33	0	0	0	0.27	0	0	0	0	0	0	0	0	0	0
ASTL	2q11.1	5.94	9.93	7.97	5.96	8.28	5.34	5.7	3.2	0.19	4.23	4.6	7.44	8.05	2.03	5.74	8.16	0.6	4.71	0.03	0	0.1	0	0	0	0	0	0	0	0	0	0	0.2	0	0.23	0	0
DUSP2	2q11.2	7.47	12.16	9.04	7.95	9.07	6.11	7.6	4.27	0.58	5.74	6.37	9.26	10.73	2.03	7.87	9.75	1.01	6.59	0.18	0.5	0.29	0.33	0	0	0.38	0	0	0.3	0.35	0	0	0	0.64	0	0.2	0
STARD7	2q11.2	2.79	4.47	2.62	3.97	1.58	1.02	3.04	1.87	0.58	2.11	2.83	3.22	4.15	0.61	4.26	3.4	0.6	2.64	0.07	0	0.19	0	0.2	0	0.19	0.27	0	0	0	0.2	0	0	0	0	0.2	0
TMEM127	2q11.2	8.11	13.4	8.94	7.95	10.26	8.4	7.22	5.87	2.14	6.65	6.73	7.04	13.9	2.64	9.79	11.34	1.61	3.58	0.05	0	0.1	0	0	0	0.38	0	0.19	0	0	0.2	0	0	0	0	0	0
CIAO1	2q11.2	8.11	13.4	8.94	7.95	10.26	8.4	7.22	5.87	2.14	6.65	6.73	7.04	13.9	2.64	9.79	11.34	1.61	3.58	0.08	0	0.19	0	0	0	0.19	0	0	0	0.35	0	0.24	0	0.21	0	0	0
SNRNP200	2q11.2	9.3	14.39	10.69	11.59	11.44	9.41	7.98	5.87	2.53	7.85	7.26	9.05	15.37	2.64	10.43	13.38	1.81	5.46	0.18	0	0.19	0	0.2	0.25	0.19	0.53	0	0	0	0.2	0.24	0.2	0.43	0.45	0	0.38
ITPRIPL1	2q11.2	9.89	14.89	11.76	13.25	11.44	9.92	9.51	5.07	2.33	7.85	7.61	10.26	16.1	2.24	10.85	14.06	2.82	6.21	0.16	0	0	0	0	0.25	0.19	0.53	0.19	0	0.18	0.2	0.24	0	0	0.45	0.2	0
NCAPH	2q11.2	5.83	7.69	7.48	9.93	5.92	7.12	5.51	2.67	0.78	4.53	4.42	6.44	9.51	0.61	6.81	8.16	1.81	3.77	0.04	0	0.19	0	0	0	0	0	0	0	0	0	0	0	0.21	0	0	0
ARID5A	2q11.2	0.8	0.74	1.75	1.32	1.38	0.25	0.95	0.53	0	0	0.35	0.6	1.22	0.41	0.21	0.23	0.4	0.38	0.07	0	0.1	0	0	0.25	0	0	0.19	0	0	0	0.24	0	0.21	0.45	0	0
LMAN2L	2q11.2	0.15	0.25	0.1	0	0.2	1.27	0.38	0	0	0.3	0	0	0.73	0	0.21	0	0	0	0.07	0	0.1	0	0	0.25	0	0.27	0.19	0	0.18	0.4	0	0	0	0	0	0
CNNM4	2q11.2	1.42	2.48	2.14	2.32	1.78	1.53	2.09	0.27	0	0	1.24	1.01	1.46	0.2	1.7	2.49	0	0.75	0.18	0.25	0.49	0	0.2	0.25	0.38	0.27	0.19	0.3	0	0.6	0	0	0	0.23	0.2	0
CNNM3	2q11.2	2.06	3.72	3.21	3.64	2.56	1.53	3.23	1.07	0	0.91	1.59	1.41	3.41	0.2	1.91	3.4	0	0.75	0.4	0.25	0.19	0	0.39	0.25	0.57	0.53	0.78	0	0.71	0.4	0.49	0.2	0.64	0.23	1.01	0.38
ANKRD23	2q11.2	2.15	3.72	3.4	3.64	2.76	1.53	3.23	1.07	0	0.91	1.59	1.61	3.66	0.2	1.91	3.4	0	0.94	0.07	0	0.1	0	0.2	0.25	0.19	0	0	0.6	0	0	0	0	0	0.23	0	0
ANKRD39	2q11.2	3.27	5.46	4.37	4.97	3.75	2.04	3.8	1.6	0.58	0.91	3.19	3.42	4.15	0.81	3.4	4.99	0.2	1.51	0.05	0	0.1	0	0	0	0	0	0.19	0	0.18	0	0	0	0	0	0	0
SEMA4C	2q11.2	3.24	5.21	4.37	4.97	3.75	2.04	3.61	1.6	0.58	0.91	3.19	3.42	4.15	0.81	3.4	4.99	0.2	1.51	0	0	0	0	0	0	0	0	0	0	0	0	0	0	0	0	0	0
ACTR1B	2q11.2	5.33	8.68	5.25	6.29	5.13	4.83	5.32	4.27	0.58	3.93	4.07	6.24	10.49	1.83	4.89	6.12	1.01	3.95	0.38	0	0.19	0.33	0.39	0.25	0.57	0.27	0.78	0	0.18	0.2	0.98	0.41	0.43	0.91	0	1.32
COX5B	2q11.2	5.33	8.68	5.25	6.29	5.13	4.83	5.32	4.27	0.58	3.93	4.07	6.24	10.49	1.83	4.89	6.12	1.01	3.95	0.01	0	0	0	0	0	0	0	0	0	0	0	0	0.2	0	0	0	0
FAHD2B	2q11.2	0.49	0.25	0.29	0.66	0.39	0.76	0.76	0.27	0	0.3	0.35	0.2	0.49	0.2	0.43	0.23	0	0.75	0.19	0	0	0.33	0	0	0.38	0.27	0.39	0	0	0.2	0.49	0.2	0	0	0.6	0.19
ZAP70	2q11.2	4.76	10.17	4.57	6.95	4.93	3.05	4.56	2.93	1.36	2.72	4.07	6.24	7.8	2.64	5.11	4.99	1.61	1.88	0.14	0.5	0.1	0	0.39	0.76	0	0.27	0	0	0	0	0	0	0.21	0.23	0.4	0
CNGA3	2q11.2	2.9	3.97	3.01	5.63	2.76	2.04	2.66	0.53	0.97	2.42	2.3	2.62	3.9	1.02	4.89	4.31	0.6	1.51	1.52	0.99	1.55	2.32	0.79	1.78	0.95	1.33	0.97	1.21	1.06	2.01	3.66	2.24	1.7	1.81	1.81	1.69
UNC50	2q11.2	6.81	11.66	6.9	7.28	6.51	7.38	6.27	3.47	0.39	5.14	6.9	7.44	11.46	1.42	7.66	9.07	2.21	3.95	0.02	0	0	0	0	0	0	0	0	0	0	0	0	0	0.21	0	0	0.19
MGAT4A	2q11.2	4.18	5.71	4.08	3.97	4.34	4.58	4.56	2.13	0.19	3.02	4.6	3.62	7.32	1.02	4.89	4.76	2.21	2.07	0.02	0	0.1	0	0	0	0	0.27	0	0	0	0	0	0	0	0	0	0
TSGA10	2q11.2	2.64	3.72	2.43	3.31	3.94	1.27	3.61	2.13	0.78	1.81	2.3	1.81	4.88	1.02	2.98	2.27	0.4	1.13	0.12	0.25	0.1	0	0.2	0	0	0	0	0	0	0	0	0.2	0.64	0.23	0	0
C2orf15	2q11.2	6.18	12.16	7.19	4.64	8.09	4.07	5.32	2.67	2.33	3.32	6.02	6.64	8.78	1.02	6.17	8.84	1.21	4.14	0	0	0	0	0	0	0	0	0	0	0	0	0	0	0	0	0	0
LIPT1	2q11.2	6.17	12.16	7.19	4.64	8.09	4.07	5.32	2.67	2.33	3.32	6.02	6.64	8.54	1.02	6.17	8.84	1.21	4.14	0.21	0	0.1	0	0.39	0	0.38	0	0.19	0	0.18	0.6	0	0.41	0	0.45	0.4	0.19
MRPL30	2q11.2	6.17	12.16	7.19	4.64	8.09	4.07	5.32	2.67	2.33	3.32	6.02	6.64	8.54	1.02	6.17	8.84	1.21	4.14	0.02	0	0.1	0	0	0	0	0	0	0	0.18	0	0	0	0	0	0	0
MITD1	2q11.2	6.17	12.16	7.19	4.64	8.09	4.07	5.32	2.67	2.33	3.32	6.02	6.64	8.54	1.02	6.17	8.84	1.21	4.14	0.05	0	0.19	0.33	0	0	0	0	0	0	0.18	0.2	0	0	0	0	0	0
LYG1	2q11.2	0.81	1.99	1.65	0.66	0.2	0.25	0.95	0.53	0	0.6	0.71	0.8	1.46	0.2	0	0.45	0	0.75	0.07	0	0	0.33	0	0	0.19	0.27	0	0	0	0.4	0	0	0.21	0	0	0
LYG2	2q11.2	0.27	0.25	0.68	0.66	0.2	0.25	0.19	0	0	0	0.35	0.4	0.49	0	0	0	0	0.19	0.09	0.5	0.1	0	0	0	0	0.27	0	0	0	0.4	0	0	0.21	0.23	0.2	0
TXNDC9	2q11.2	0.71	1.99	1.26	0.33	0.2	0.25	0.95	0.53	0	0.6	0.53	0.8	1.46	0.2	0	0.45	0	0.56	0.01	0	0	0	0.2	0	0	0	0	0	0	0	0	0	0	0	0	0
REV1	2q11.2	9.01	15.88	10.69	12.91	9.27	8.4	7.22	3.2	1.75	6.34	9.91	9.66	12.44	3.25	10.64	11.34	1.81	6.59	0.11	0	0.1	0.66	0	0	0	0.27	0	0	0.53	0	0	0	0	0	0	0
AFF3	2q11.2	2.64	4.47	3.01	4.97	2.76	2.54	2.47	0.8	0	1.21	2.48	2.82	5.12	0.41	1.7	2.49	0.8	1.69	0.09	0.25	0.1	0	0.2	0	0	0	0.19	0	0.35	0	0.24	0	0	0.23	0.2	0
LONRF2	2q11.2	5.73	9.43	6.61	6.95	7.5	3.82	6.27	1.87	0.97	3.63	6.02	6.04	10.98	2.64	6.6	5.9	1.81	1.69	0.04	0	0.19	0	0.2	0	0	0	0	0	0	0	0	0.2	0	0	0	0
CHST10	2q11.2	4.28	8.19	4.76	5.3	6.31	3.82	3.61	1.87	0.78	3.93	3.54	5.03	6.59	0.81	4.89	4.99	0.4	2.82	0.13	0	0.1	0	0.79	0	0.19	0	0	0.6	0.18	0	0.24	0.41	0	0	0.2	0
NMS	2q11.2	4.36	5.71	4.86	4.97	6.11	5.34	3.23	1.6	0.78	2.72	3.36	4.43	7.32	1.42	3.19	6.35	0.8	3.39	0.05	0	0	0	0	0	0	0	0	0	0	0	0	0	0.43	0.23	0.2	0
PDCL3	2q11.2	2.95	4.71	3.5	2.98	4.14	2.29	3.61	1.6	0.78	2.42	1.95	2.01	5.61	0.2	3.83	2.49	0.6	1.51	0.02	0	0.1	0	0	0	0	0	0	0	0	0	0	0.2	0	0	0	0
NPAS2	2q11.2	11.55	19.6	13.8	10.93	12.43	11.2	10.84	5.33	1.75	9.06	11.86	10.66	17.32	5.08	11.06	15.87	3.22	7.72	0.04	0	0.1	0	0	0	0.19	0	0	0.3	0	0	0	0.2	0	0	0	0
RPL31	2q11.2	12.26	20.35	16.13	12.91	13.81	10.94	11.79	6.67	2.53	8.46	12.21	10.66	19.02	4.67	11.49	16.1	3.22	9.04	0.01	0	0	0	0	0	0.19	0	0	0	0	0	0	0	0	0	0	0
RNF149	2q11.2	3.72	5.96	4.37	5.3	3.75	3.05	3.99	1.6	0.19	2.42	3.54	5.03	6.1	0.61	2.77	4.99	0.4	2.26	0.01	0	0	0	0	0	0	0	0	0	0	0.2	0	0	0	0	0	0
CREG2	2q11.2	3.8	5.71	4.37	4.64	4.93	4.33	2.09	0.8	0.58	3.93	2.65	2.82	10	0.61	4.89	4.31	0.6	2.07	0.1	0	0.1	0	0.2	0.25	0	0	0	0	0	0.2	0	0	0.21	0	0.2	0
IL1R2	2q11.2	2.03	2.98	2.53	2.98	2.56	3.05	1.9	0.53	0.19	2.11	2.3	1.81	2.68	1.02	2.13	1.36	0.2	0.94	0.05	0	0	0	0	0.25	0.38	0	0	0	0	0	0	0	0	0	0.2	0.19
IL1R1	2q11.2	2.24	4.71	2.43	3.31	2.76	1.53	0.76	1.87	0.19	1.51	1.77	1.41	3.41	0.81	1.28	4.31	0.6	1.69	0.01	0	0.1	0	0	0	0	0	0	0	0	0	0	0	0	0	0	0
IL1RL2	2q12.1	4.85	8.93	5.64	6.95	6.9	3.31	2.85	3.47	0.58	2.42	4.42	4.83	8.78	0.81	5.74	8.39	1.21	3.2	0.11	0	0.19	0	0.2	0	0	0	0.39	0	0.18	0.2	0	0	0.21	0	0.2	0.19
IL18R1	2q12.1	13.05	19.35	16.33	15.89	15.19	12.21	11.79	5.6	3.89	5.44	12.92	14.08	22.93	4.27	15.32	18.37	4.63	11.86	0.03	0	0	0	0	0	0	0	0	0	0	0.2	0	0	0	0	0.2	0
IL1RL1	2q12.1	10.31	15.63	12.73	12.91	12.23	10.18	8.56	4.53	2.14	4.23	9.91	10.66	19.76	3.05	12.55	14.29	2.82	9.6	0.12	0.25	0.1	0.33	0	0.51	0.19	0.27	0.19	0	0	0.4	0	0	0	0	0	0.19
IL18RAP	2q12.1	7.99	13.15	11.18	8.28	11.05	4.83	5.89	3.47	2.14	5.74	6.37	9.86	12.44	1.42	7.45	12.24	2.62	5.27	0.04	0	0	0	0	0.25	0	0	0	0	0.18	0	0.24	0	0	0	0	0
SLC9A4	2q12.1	10.04	14.89	11.27	11.92	12.82	9.41	8.17	5.6	2.33	9.67	8.14	11.87	16.1	3.66	11.06	13.15	2.01	7.34	0.11	0.25	0.19	0	0.2	0	0.38	0	0.19	0	0	0	0	0.41	0	0	0.4	0
SLC9A2	2q12.1	2.34	3.72	2.92	2.98	3.16	2.29	2.47	0.53	0.19	1.51	2.83	1.61	4.39	0	2.77	2.49	0.4	1.88	0.04	0	0	0.33	0	0	0	0	0	0	0	0	0	0	0.21	0	0.2	0
MFSD9	2q12.1	7.46	13.4	8.16	8.28	9.27	6.36	5.7	2.4	0.58	5.14	7.26	8.05	15.12	0.81	9.15	9.3	1.41	4.9	0.12	0	0.29	0	0	0	0.19	0	0	0.3	0	0.2	0	0.41	0.43	0.23	0	0
TMEM182	2q12.1	3.12	5.46	3.4	3.97	3.94	1.27	1.9	0.8	0.39	3.32	2.65	3.62	5.85	0.41	2.34	4.31	0.6	2.07	0.03	0	0	0	0	0.25	0	0	0	0	0	0.2	0.24	0	0	0	0	0
POU3F3	2q12.1	0.02	0	0	0	0	0	0	0	0	0	0	0	0	0	0	0	0	0	0.01	0	0	0	0	0	0	0	0	0	0	0.2	0	0	0	0	0	0
MRPS9	2q12.1	4.7	5.46	5.15	3.97	5.72	4.07	5.13	1.07	1.36	5.14	6.19	6.04	9.76	1.63	5.53	6.12	1.61	2.45	0.28	0.25	0.29	0	0.39	0.25	0.19	0	0.58	0	0.18	0.2	0.24	0.41	0.43	0.45	0	0.38
GPR45	2q12.1	4.93	10.17	5.64	4.3	7.3	4.83	3.23	2.4	0.97	3.63	3.72	3.82	8.78	1.02	4.47	5.9	1.41	2.82	0.03	0	0.1	0	0	0	0.19	0	0	0	0	0	0	0	0	0	0.2	0
TGFBRAP1	2q12.1	5.98	11.66	6.51	6.62	8.88	6.87	4.18	4.53	0.97	4.53	6.02	4.02	10	1.42	5.11	7.48	1.41	3.01	0	0	0	0	0	0	0	0	0	0	0	0	0	0	0	0	0	0
C2orf49	2q12.1	7.34	12.41	8.55	8.61	8.88	6.87	5.7	4.53	0.78	6.04	7.61	7.65	13.41	1.83	7.02	7.26	1.01	3.77	0.03	0	0	0	0	0	0	0.27	0	0	0	0	0	0	0	0	0	0.38
FHL2	2q12.1	5.93	10.67	7.48	5.3	5.92	5.34	4.37	4	0.78	4.53	4.42	6.24	11.95	1.42	6.38	6.35	1.01	3.39	0.4	0	0.39	0.66	0.2	0.51	0.38	1.07	0.39	0.3	0	0.6	0.24	0.2	0.64	0.23	1.21	0.38
NCK2	2q12.2	0.1	0	0.29	0	0	0	0	0	0	0.3	0	0	0.24	0	0.21	0	0	0	0.15	0.25	0	0	0.2	0	0.38	0	0.19	0	0	0	0	0	0.85	0.23	0	0.56
C2orf40	2q12.2	0.71	0.99	0.97	1.66	0.59	1.02	0	0.53	0	0.6	0.35	0.8	2.2	0.61	0.64	0.68	0	0.56	0.02	0	0	0.33	0	0	0	0	0	0	0	0	0	0	0	0.23	0	0
ST6GAL2	2q12.2	8.35	14.89	10.01	6.95	10.45	10.18	6.65	2.93	1.95	7.85	7.79	11.07	14.39	3.25	7.02	9.3	0.8	4.71	0.09	0	0.19	0	0	0	0.19	0	0.19	0	0	0.2	0	0	0	0	0.2	0.38
SLC5A7	2q12.3	3.5	6.2	3.98	3.64	5.92	2.54	3.23	1.33	0.97	3.93	2.65	4.02	7.32	1.22	3.19	3.4	1.01	1.88	0.3	0	0.39	0	0.2	0	0	0.27	0.58	0.6	0.35	0	0.73	0.81	0.43	0.23	0.6	0.38
SULT1C3	2q12.3	8.43	14.14	11.08	10.93	9.86	8.14	6.46	3.73	0.97	6.65	9.38	10.06	14.88	2.64	7.02	10.43	1.61	4.9	0.1	0	0	0.33	0	0.25	0.19	0	0	0	0.35	0	0	0.2	0	0	0.2	0
SULT1C2	2q12.3	5.73	10.42	7.68	8.61	7.5	3.31	5.7	1.33	0.78	5.44	6.73	7.24	9.51	1.42	4.04	7.26	1.21	3.39	0.12	0	0.19	0	0	0	0.19	0.27	0.19	0	0	0	0.49	0	0	0.23	0	0.19
SULT1C4	2q12.3	3.04	4.47	3.98	2.32	4.73	3.56	2.85	1.6	0.39	1.21	2.48	3.62	4.63	0.61	4.04	3.85	0.2	3.01	0.26	0	0.29	0	0.2	0.25	0	0.27	0	0	0.35	0.4	0	0	0	1.13	1.21	0.19
GCC2	2q12.3	7.76	11.17	9.23	7.62	8.48	9.41	10.27	2.67	2.72	3.93	8.32	8.45	12.2	4.06	8.3	9.98	2.01	6.97	0.07	0.25	0.1	0.33	0	0	0	0.27	0	0	0.18	0	0	0	0	0.23	0	0.19
LIMS1	2q12.3	0.25	0.5	0.39	0.33	0.2	0	0.38	0.53	0	0.3	0.35	0.6	0.24	0	0.21	0	0.2	0.19	0.04	0	0	0	0	0	0	0.27	0	0	0	0	0	0	0	0	0.2	0
RANBP2	2q12.3	5.94	10.42	9.23	6.62	7.5	5.6	4.18	4.27	0.97	5.44	5.49	7.85	10.49	1.63	4.26	6.8	1.41	4.33	0.15	0	0	0	0.39	0.25	0	0	0.58	0.3	0.35	0	0.24	0	0	0	0.2	0.38
CCDC138	2q12.3	5.3	7.44	7.97	5.3	8.88	2.8	3.23	4	0.58	4.83	4.6	5.63	10.98	2.24	2.77	6.58	1.61	3.95	0.29	0.25	0.58	0.33	0.2	0.51	0	0	0.19	1.21	0	0	0	0.41	0.21	0.91	0.2	0.19
EDAR	2q12.3	4.64	6.45	5.93	4.97	4.34	4.33	4.56	3.2	0.78	1.81	4.42	6.84	7.8	1.42	3.83	6.8	2.01	3.2	0.46	0	0.39	0	0.39	0.25	0.19	0	0.19	0.3	0.89	0.2	0	0.81	0.21	1.36	0.4	0.56
BUB1	2q13	1.38	2.23	2.04	1.66	1.78	1.02	0.95	0.8	0.39	0.3	1.24	1.61	3.17	0.2	1.49	2.27	0	1.32	0.07	0	0.19	0	0	0	0.19	0.27	0	0	0	0.2	0	0	0	0	0	0.19
MALL	2q13	0.48	0.99	1.26	0.66	0.2	0.51	0.57	0.27	0.19	0.91	0.53	0.2	0.24	0	0	0	0.2	0.56	0	0	0	0	0	0	0	0	0	0	0	0	0	0	0	0	0	0
NPHP1	2q13	4.4	7.94	7	5.96	6.31	3.31	3.99	1.33	0.97	4.53	2.48	4.02	8.78	1.22	3.4	5.67	1.01	3.01	0.23	0.25	0.29	0	0.59	0	0.57	0.53	0.39	0	0.18	0.2	0.24	0.41	0	0.45	0.2	0
ACOXL	2q13	6.92	11.91	9.04	8.61	6.71	7.38	5.89	3.73	0.58	6.04	5.66	5.03	15.12	2.85	7.87	10.43	1.01	3.39	0.29	0.25	0.19	0.66	0.2	0	0.38	0.27	0.19	0.3	0.53	0	0	0.41	0.21	0.23	1.01	0.38
BCL2L11	2q13	3.06	3.72	3.6	3.64	2.17	2.8	2.28	0.8	0.39	2.42	3.36	4.43	5.85	1.02	3.19	4.31	0.6	1.32	0	0	0	0	0	0	0	0	0	0	0	0	0	0	0	0	0	0
ANAPC1	2q13	8.02	14.39	9.62	7.62	9.07	6.36	6.27	4.27	2.14	4.53	5.84	9.86	13.17	4.27	8.94	10.43	1.61	5.27	0.01	0	0	0	0	0	0	0	0	0	0.18	0	0	0	0	0	0	0
MERTK	2q13	13.16	20.6	14.87	16.56	15.98	12.72	9.32	4.53	2.72	12.69	12.74	15.9	23.66	5.49	16.38	16.55	2.62	9.79	0.22	0	0.29	0	0.2	0.25	0.19	0.8	0.19	0.6	0.35	0	0.24	0.41	0.21	0	0.2	0.19
TMEM87B	2q13	8.13	13.4	10.11	11.92	9.66	6.62	6.65	4.53	1.36	6.95	6.02	8.25	12.68	3.66	8.51	8.39	3.42	4.52	0.11	0	0.1	0.66	0	0	0.19	0.27	0	0	0	0.2	0	0	0.21	0.68	0	0
FBLN7	2q13	0.48	0.74	0.68	0.66	0.2	0	0.76	0	0	1.21	0.18	0.2	1.22	0.2	0.43	0.45	0	0.19	0.16	0.5	0	0	0.39	0.25	0	0.53	0.19	0.3	0	0.2	0.24	0.2	0	0	0	0.19
TTL	2q13	7.52	12.16	8.55	8.28	8.48	7.89	6.84	3.2	1.17	8.16	4.25	8.45	15.37	2.24	9.15	12.47	1.61	5.27	0	0	0	0	0	0	0	0	0	0	0	0	0	0	0	0	0	0
POLR1B	2q13	11.34	17.87	12.93	13.25	10.85	11.2	10.08	5.6	3.31	12.39	8.5	12.27	21.46	5.69	13.19	17.01	2.82	7.91	0.32	0.25	0.49	0.33	0.79	0	0.57	0.8	0	0	0.18	0.2	0.73	0.41	0.21	0	0.2	0.19
CHCHD5	2q13	10.56	16.63	12.34	11.59	10.06	10.18	8.94	5.33	3.11	11.18	7.96	11.67	20.24	5.69	11.06	16.33	2.82	6.78	0.01	0	0	0	0	0	0	0	0.19	0	0	0	0	0	0	0	0	0
SLC20A1	2q13	3.19	6.7	4.08	4.64	2.76	3.31	2.85	0.53	0.39	2.72	2.65	3.82	7.56	1.02	2.77	2.95	0.6	3.2	0.31	0.5	0.19	0	0.39	0.25	0.19	0.27	0	0.6	0.53	0	0.24	0.41	0.64	0.23	0.4	0.38
CKAP2L	2q13	8.87	14.64	10.11	11.26	9.27	10.18	7.79	4	1.56	7.25	7.26	9.05	17.8	2.64	9.57	10.43	1.41	7.53	0.01	0	0	0	0	0	0.19	0	0	0	0	0	0	0	0	0	0	0
IL1A	2q13	8.87	14.64	10.11	11.26	9.27	10.18	7.79	4	1.56	7.25	7.26	9.05	17.8	2.64	9.57	10.43	1.41	7.53	0.05	0.25	0.1	0	0	0	0	0	0.19	0	0	0	0	0	0	0.23	0	0
IL1B	2q13	2.22	4.47	3.11	1.32	2.37	1.53	2.09	0.53	0	1.81	1.59	1.81	5.12	0.61	2.34	3.17	0.4	2.26	0.01	0.25	0	0	0	0	0	0	0	0	0	0	0	0	0	0	0	0
IL1F10	2q13	7.55	13.4	9.91	8.61	10.85	5.6	7.03	3.47	0.97	6.04	5.84	8.45	12.93	2.44	7.66	10.43	1.01	6.59	0.01	0	0	0	0	0	0	0	0	0.3	0	0	0	0	0	0	0	0
IL1RN	2q13	7.19	13.15	10.3	9.6	7.5	6.36	6.27	3.2	0.97	3.93	6.73	6.44	12.44	2.24	8.3	8.84	0.8	7.53	0	0	0	0	0	0	0	0	0	0	0	0	0	0	0	0	0	0
PSD4	2q13	10.37	17.37	14.09	11.92	12.23	9.67	7.41	6.13	3.11	9.37	9.2	10.87	22.2	2.85	7.45	11.79	2.82	9.23	0.04	0	0	0	0	0	0	0	0	0	0.35	0	0.24	0	0	0	0	0
CBWD2	2q13	0.31	0	0.97	0	0.39	0.25	0.38	0.27	0	0.6	0.53	0.2	0	0.2	0	0	0	0.75	0	0	0	0	0	0	0	0	0	0	0	0	0	0	0	0	0	0
RABL2A	2q13	0.53	1.24	0.68	0.99	0.99	0.51	0.38	0.8	0	0.3	0.18	0.2	0.49	0.2	0.21	0.45	0.4	0.94	0.06	0	0	0	0	0.25	0	0	0	0	0.18	0.2	0	0	0	0	0.2	0
SLC35F5	2q14.1	6.09	10.17	7.29	9.27	6.9	4.07	4.18	2.93	1.17	3.93	5.66	5.43	12.93	2.64	7.23	6.35	1.21	5.08	0.02	0	0	0	0	0	0	0	0	0.3	0	0	0.24	0	0	0	0	0
ACTR3	2q14.1	1.99	2.73	3.11	1.32	2.56	1.78	1.33	0.53	0.19	1.81	1.95	1.61	2.68	0.61	3.4	2.27	0.4	1.51	0.09	0	0.1	0.33	0	0	0.38	0.53	0.19	0	0.18	0	0	0	0	0	0	0
DPP10	2q14.1	8.94	12.16	10.79	10.26	8.28	11.2	6.46	4	1.56	6.95	9.73	8.85	16.83	5.28	9.57	11.11	2.01	5.08	0.11	0.25	0.1	0	0.2	0.25	0.19	0	0.19	0	0	0	0.49	0	0.21	0	0	0
DDX18	2q14.1	7.68	11.66	9.72	7.28	6.11	6.36	5.13	1.87	0.97	6.34	8.5	7.44	14.63	4.88	10	8.84	1.61	4.33	0.03	0.25	0.1	0	0	0	0	0	0	0	0	0	0	0	0	0	0.2	0
CCDC93	2q14.1	8.6	10.42	10.01	12.58	9.27	8.91	5.89	4	2.72	6.65	6.02	7.85	18.05	6.1	7.87	9.07	2.21	5.27	0.1	0	0.1	0.33	0.2	0	0	0	0.19	0	0	0	0	0.41	0.21	0.23	0.2	0
INSIG2	2q14.2	0.57	1.49	0.58	0.33	0.39	0.76	0.76	0.53	0.19	0.3	0.53	0.4	1.22	0.61	0.64	0.23	0.2	0.38	0.01	0	0	0	0	0	0	0	0	0	0	0	0	0	0	0	0.2	0
[truncated: 12,145 more rows]
