# Supplementary material for: Systematic discovery of germline cancer predisposition genes through the identification of somatic second hits
Source: Nat Commun. 2018 Jul 4;9:2601. doi: 10.1038/s41467-018-04900-7 (PMC6031629; doi:10.1038/s41467-018-04900-7)
Supplement: Supplementary file 5 — Supplementary Data 3 [file 41467_2018_4900_MOESM5_ESM.xlsx]

## Sheet: Sheet1
Supplementary Data 3. Pan-cancer ALFRED analysis.
Gene	Num.of samples with AI	Num.of samples without AI	Num.of samples with RDGVs	Num.of samples without RDGVs	Num.of samples with RDGVs in AI	Num.of samples with RDGVs in noAI	Excess of RDGVs in AI samples compared with noAI samples (%)	Lower_95% CI	Upper_95% CI	Random_P	Samples with AI in RDGV samples (%)	Samples with AI in noRDGV samples (%)	Relative risk (RR)	Num.of samples with at least 10% increased VAF of RDGVs in AI samples	Num.of samples with at least 10% increased VAF of RDGVs in noAI samples	Binomial_P	ALFRED_P	FDR
BRCA1	1239	6176	199	7219	84	112	4.94	3.92	5.86	0	42.21	16	3.74	68	24	3.84e-30	3.84e-30	0
BRCA2	1939	6969	133	8778	50	80	1.45	0.82	2.01	0	37.59	21.52	2.25	41	19	3.87e-17	3.87e-17	0
ATM	1253	7653	119	8787	39	80	2.14	1.44	2.74	0	32.77	13.82	2.98	28	20	3.82e-09	3.82e-09	0
MYH1	1132	7692	190	8637	48	139	2.43	1.47	3.29	2e-06	25.26	12.55	2.35	29	23	2.76e-11	2e-06	0.00149
MNT	1568	5458	12	7014	9	3	0.57	0.29	0.74	8.2e-05	75	22.23	10.44	7	0	4.05e-05	8.2e-05	0.0457
KCNG4	1904	6979	40	8843	20	20	0.74	0.4	1.07	9.2e-05	50	21.3	3.67	12	3	3.02e-05	9.2e-05	0.0457
NOP56	1570	7224	24	8770	12	12	0.62	0.31	0.85	0.000212	50	17.77	4.6	5	0	8.35e-05	0.000212	0.0903
NSD1	1118	7760	180	8698	40	140	1.74	0.87	2.61	0.000256	22.22	12.39	1.98	20	15	1.76e-09	0.000256	0.0955
TPCN2	1338	7568	130	8777	34	95	1.32	0.57	1.93	0.000518	26.15	14.86	2.02	21	14	1.52e-09	0.000518	0.172
KCNH5	1032	7875	70	8838	18	51	1.1	0.49	1.64	0.000588	25.71	11.47	2.69	11	10	0.000338	0.000588	0.175
NIPAL3	1030	6582	62	7552	18	42	1.12	0.51	1.63	0.000744	29.03	13.4	2.74	13	6	2.36e-07	0.000744	0.193
PRPF8	2507	6074	35	8546	20	15	0.51	0.23	0.82	0.000776	57.14	29.1	3.23	12	3	0.00047	0.000776	0.193
ANK2	1069	7837	138	8768	30	108	1.38	0.58	2.18	0.000864	21.74	11.85	2.04	19	15	2e-09	0.000864	0.198
INO80	935	7951	87	8801	19	66	1.2	0.54	1.79	0.00103	21.84	10.41	2.45	10	9	0.000154	0.00103	0.219
MYH3	2240	6384	143	8482	54	88	1.03	0.39	1.6	0.00112	37.76	25.77	1.75	33	19	1.2e-09	0.00112	0.223
PATE2	1311	7563	18	8857	8	9	0.54	0.22	0.72	0.00139	44.44	14.71	5.13	4	0	0.000643	0.00139	0.259
ABCF3	1350	6990	64	8277	20	43	0.88	0.35	1.33	0.00149	31.25	16.07	2.41	13	9	7.6e-05	0.00149	0.26
GANC	1005	7903	86	8823	19	66	1.12	0.45	1.68	0.00157	22.09	11.18	2.26	11	10	5.87e-05	0.00157	0.26
MLH1	1416	6969	72	8314	22	49	0.85	0.34	1.36	0.00167	30.56	16.77	2.21	11	5	1.08e-05	0.00167	0.262
GUCY1A3	964	7937	32	8870	10	21	0.81	0.35	1.11	0.00115	31.25	10.76	3.92	7	4	0.00226	0.00226	0.335
HDAC10	1678	7218	16	8880	9	7	0.44	0.18	0.66	0.0011	56.25	18.8	5.53	4	0	0.00236	0.00236	0.335
COL7A1	1557	7280	222	8618	55	164	1.25	0.43	2.1	0.00302	24.77	17.43	1.57	27	47	0.00164	0.00302	0.393
BEST1	929	7972	69	8833	15	53	0.96	0.36	1.5	0.00288	21.74	10.35	2.43	8	9	0.00307	0.00307	0.393
GLDC	1661	6826	115	8375	34	78	0.9	0.3	1.5	0.00316	29.57	19.43	1.79	20	15	1.06e-06	0.00316	0.393
COLQ	1141	6004	75	7073	21	51	1.04	0.31	1.56	0.00366	28	15.83	2.17	13	10	7.2e-05	0.00366	0.437
TULP4	1495	7414	15	8894	7	8	0.4	0.12	0.56	0.00552	46.67	16.73	4.34	5	0	2.57e-05	0.00552	0.581
RPH3AL	1557	6522	29	8050	12	17	0.56	0.16	0.8	0.00451	41.38	19.19	2.96	8	4	0.00565	0.00565	0.581
KRT24	1010	5547	58	6501	16	40	0.94	0.23	1.46	0.00607	27.59	15.29	2.2	13	6	5.04e-08	0.00607	0.581
ALDH9A1	949	7749	44	8654	11	33	0.71	0.24	1.18	0.00638	25	10.84	2.72	6	4	0.00242	0.00638	0.581
ECEL1	1329	7564	38	8855	12	26	0.62	0.18	0.88	0.00644	31.58	14.87	2.63	8	5	0.00141	0.00644	0.581
RCL1	1484	7403	12	8875	6	6	0.32	0.08	0.49	0.00659	50	16.65	4.99	5	1	0.00641	0.00659	0.581
ABCC4	2226	6681	106	8803	37	67	0.72	0.15	1.2	0.00661	34.91	24.87	1.66	16	7	9.68e-07	0.00661	0.581
MUC17	1384	7437	45	8776	14	31	0.6	0.17	0.94	0.00672	31.11	15.61	2.43	10	6	0.00013	0.00672	0.581
ALOX12B	3224	5637	49	8814	26	21	0.44	0.1	0.73	0.0071	53.06	36.28	2.16	10	3	0.00638	0.0071	0.581
HOGA1	1538	6267	60	7746	20	39	0.65	0.16	1.13	0.00736	33.33	19.6	2.09	9	5	0.00107	0.00736	0.581
KRT36	1075	7833	63	8845	15	48	0.74	0.21	1.27	0.00743	23.81	11.98	2.28	11	7	2.22e-06	0.00743	0.581
BBS1	1140	7740	68	8815	16	49	0.81	0.2	1.26	0.00609	23.53	12.75	2.22	6	5	0.00747	0.00747	0.581
ACACA	1043	7864	38	8870	10	27	0.65	0.16	0.98	0.00754	26.32	11.65	2.79	6	4	0.00382	0.00754	0.581
SCN10A	2136	6773	369	8547	107	255	1.23	0.28	2.19	0.00759	29	23.74	1.33	52	45	5.05e-13	0.00759	0.581
THBS3	1262	7616	100	8780	23	75	0.83	0.18	1.43	0.00852	23	14.11	1.85	13	21	0.00676	0.00852	0.6
RYR1	2039	6863	318	8591	89	222	1.15	0.22	2.04	0.00911	27.99	22.7	1.35	33	53	0.00483	0.00911	0.6
USH2A	2554	6355	121	8789	47	73	0.66	0.14	1.18	0.0092	38.84	28.52	1.6	21	13	4.02e-05	0.0092	0.6
HK3	1139	7733	220	8655	41	176	1.31	0.25	2.17	0.00925	18.64	12.69	1.58	19	42	0.00209	0.00925	0.6
ALK	1290	7619	42	8868	12	29	0.54	0.14	0.91	0.00934	28.57	14.41	2.44	8	4	0.000162	0.00934	0.6
CTSB	2541	6368	50	8860	22	27	0.44	0.11	0.77	0.00936	44	28.43	2.04	13	1	2.06e-11	0.00936	0.6
TP63	1115	7367	46	8437	15	30	0.93	0.46	1.34	0.000362	32.61	13.04	3.3	8	6	0.00942	0.00942	0.6
ABCC12	1040	7864	167	8739	30	135	1.2	0.27	1.96	0.00954	17.96	11.56	1.68	17	21	6.69e-07	0.00954	0.6
SLC7A8	1149	7696	80	8766	18	61	0.8	0.15	1.35	0.00969	22.5	12.9	1.98	9	12	0.00703	0.00969	0.6
SLC12A4	1058	7847	83	8822	19	64	1.07	0.43	1.61	0.00168	22.89	11.78	2.2	10	15	0.00985	0.00985	0.6
TAGLN	1586	7323	27	8882	10	17	0.46	0.08	0.69	0.0104	37.04	17.74	2.72	7	4	0.00756	0.0104	0.62
SLC45A1	1348	6988	38	8298	12	26	0.53	0.13	0.88	0.0108	31.58	16.1	2.39	7	5	0.00778	0.0108	0.625
ARHGAP9	1156	7752	21	8887	7	14	0.5	0.1	0.7	0.0109	33.33	12.93	3.35	4	0	7.76e-05	0.0109	0.625
BLK	1311	7590	42	8859	12	30	0.54	0.13	0.89	0.0118	28.57	14.66	2.32	6	4	0.00639	0.0118	0.664
DDX60	877	6842	15	7704	6	9	0.51	0.19	0.77	0.00556	40	11.31	5.2	4	1	0.0121	0.0121	0.669
MTMR7	1864	7044	78	8831	25	52	0.61	0.1	1.05	0.0125	32.05	20.82	1.82	10	7	0.00193	0.0125	0.67
MLH3	1203	7704	66	8842	17	48	0.77	0.24	1.25	0.00412	25.76	13.41	2.27	9	11	0.0128	0.0128	0.67
MYH8	1900	7007	123	8785	37	85	0.74	0.1	1.3	0.0128	30.08	21.21	1.61	21	13	2.38e-08	0.0128	0.67
ABCA6	1654	7253	139	8770	36	101	0.82	0.11	1.45	0.0136	25.9	18.45	1.56	13	18	0.0105	0.0136	0.693
ABCC6	1188	7719	121	8786	25	96	0.87	0.15	1.55	0.0137	20.66	13.24	1.69	10	16	0.00761	0.0137	0.693
SLC7A2	1539	7248	98	8690	26	71	0.71	0.12	1.26	0.0143	26.53	17.41	1.72	13	10	3.57e-05	0.0143	0.701
CYB5R2	1806	7103	47	8863	16	30	0.49	0.07	0.83	0.0148	34.04	20.2	2.1	10	9	0.0149	0.0149	0.701
PNLIP	1607	7302	20	8889	8	12	0.38	0.08	0.57	0.0152	40	17.99	3.03	7	1	7.92e-06	0.0152	0.701
CAPN12	1196	7269	44	8421	12	32	0.58	0.1	0.97	0.0153	27.27	14.06	2.28	7	6	0.00641	0.0153	0.701
SACS	1823	7085	241	8671	63	174	0.97	0.1	1.76	0.0158	26.14	20.3	1.41	37	19	2.1e-19	0.0158	0.701
TNKS	1390	7519	9	8900	5	4	0.34	0.09	0.43	0.00736	55.56	15.56	6.76	3	0	0.0158	0.0158	0.701
PKD2L1	1550	7046	53	8544	16	36	0.55	0.08	0.94	0.016	30.19	17.95	2.02	8	5	0.00164	0.016	0.701
FAM166A	1326	7488	31	8783	12	19	0.71	0.27	0.98	0.000944	38.71	14.96	3.57	6	3	0.016	0.016	0.701
CNTN3	1229	7047	7	8269	4	3	0.29	0.1	0.38	0.0141	57.14	14.81	7.65	3	0	0.0161	0.0161	0.701
ZSCAN22	895	8004	5	8894	3	2	0.37	0.12	0.37	0.00852	60	10.03	13.41	3	0	0.0162	0.0162	0.701
MYO16	1910	6972	58	8824	23	35	0.67	0.27	1.07	0.00155	39.66	21.38	2.4	10	7	0.0167	0.0167	0.704
MLKL	1559	7326	43	8842	14	29	0.47	0.08	0.86	0.0142	32.56	17.47	2.27	6	4	0.0168	0.0168	0.704
NLRP12	1072	7804	89	8788	18	70	0.74	0.11	1.38	0.017	20.22	11.99	1.87	8	9	0.00195	0.017	0.704
WDR11	1320	6594	76	7839	20	55	0.73	0.09	1.23	0.0174	26.32	16.58	1.82	12	10	0.000101	0.0174	0.711
MTMR9	1063	6359	83	7342	19	61	0.88	0.11	1.43	0.018	22.89	14.22	1.86	11	10	0.000122	0.018	0.713
ATP13A2	1703	7195	53	8845	17	36	0.51	0.07	0.87	0.0182	32.08	19.06	2	10	10	0.014	0.0182	0.713
DST	1165	7730	139	8759	27	109	0.89	0.1	1.63	0.0183	19.42	12.99	1.64	17	19	4.86e-07	0.0183	0.713
TTC19	1524	6001	25	7500	10	15	0.41	0.08	0.7	0.0184	40	20.19	2.63	7	2	0.000418	0.0184	0.713
HAL	1651	7257	111	8799	29	80	0.67	0.07	1.23	0.0188	26.13	18.43	1.59	19	10	1.79e-10	0.0188	0.719
CSF2RA	1821	7012	86	8749	26	58	0.62	0.07	1.07	0.0192	30.23	20.52	1.73	16	5	1.55e-10	0.0192	0.725
LRCH3	1179	7725	18	8886	6	12	0.39	0.05	0.59	0.02	33.33	13.2	3.28	5	2	0.0039	0.02	0.737
MOV10L1	2189	6714	91	8814	31	58	0.55	0.06	1	0.02	34.07	24.48	1.64	13	10	0.0021	0.02	0.737
SGSH	2114	6785	29	8871	12	16	0.31	0.03	0.59	0.0204	41.38	23.7	2.41	8	3	0.00152	0.0204	0.742
SLC28A3	991	4554	10	5535	5	5	0.37	0.06	0.61	0.0208	50	17.81	4.6	3	0	0.00955	0.0208	0.742
MX1	1592	7285	78	8801	27	49	1	0.5	1.49	0.000162	34.62	17.78	2.52	11	10	0.0211	0.0211	0.742
CCDC125	1113	7637	10	8741	4	5	0.31	0.05	0.41	0.0211	40	12.69	5.49	3	0	0.00509	0.0211	0.742
KCNK10	1095	7774	27	8843	8	18	0.52	0.1	0.83	0.0123	29.63	12.29	3.16	4	2	0.0218	0.0218	0.756
MSH3	1268	7634	89	8816	20	66	0.64	0.05	1.24	0.0232	22.47	14.16	1.82	12	10	1.59e-05	0.0232	0.795
PCCA	1181	7699	54	8826	13	41	0.59	0.05	0.98	0.0242	24.07	13.23	2.07	7	7	0.00612	0.0242	0.809
THBS4	927	6114	111	6932	22	87	0.99	0.06	1.74	0.0244	19.82	13.06	1.67	13	17	0.000114	0.0244	0.809
UBASH3A	1771	7106	19	8859	8	10	0.35	0.07	0.49	0.0143	42.11	19.9	3.21	4	1	0.0246	0.0246	0.809
PNPLA7	891	7853	59	8686	11	47	0.62	0.06	1.12	0.0248	18.64	10.13	2.06	7	8	0.00187	0.0248	0.809
VANGL1	1213	7273	36	8450	10	26	0.48	0.05	0.82	0.025	27.78	14.24	2.31	5	4	0.0245	0.025	0.809
MASP1	1067	7831	93	8807	18	73	0.75	0.05	1.33	0.0254	19.35	11.91	1.81	7	10	0.0122	0.0254	0.809
TNFRSF13B	1669	7220	86	8803	24	62	0.59	0.04	1.07	0.0255	27.91	18.69	1.67	17	15	5.83e-06	0.0255	0.809
BARX2	898	6753	28	7623	8	20	0.63	0.13	0.95	0.0142	28.57	11.68	3.01	5	4	0.0261	0.0261	0.814
TRPM5	1161	7528	25	8664	8	17	0.5	0.15	0.8	0.00798	32	13.31	3.05	4	2	0.0262	0.0262	0.814
LYST	1374	6176	25	7525	9	16	0.44	0.04	0.71	0.0265	36	18.14	2.53	6	0	1.23e-07	0.0265	0.815
RRH	857	8051	15	8893	5	10	0.52	0.13	0.65	0.0136	33.33	9.58	4.7	4	2	0.0268	0.0268	0.817
CASP8	987	7384	25	8347	7	17	0.46	0.11	0.8	0.0171	28	11.74	3.08	5	4	0.0273	0.0273	0.818
SULT6B1	1040	7869	15	8894	5	10	0.33	0.05	0.54	0.0275	33.33	11.64	3.78	4	1	0.00412	0.0275	0.818
FECH	1254	7652	47	8859	12	35	0.46	0.05	0.88	0.0277	25.53	14.02	2.09	9	5	1.8e-05	0.0277	0.818
H6PD	1217	6517	106	7629	24	81	0.78	0.05	1.41	0.0282	22.64	15.64	1.59	17	20	7.36e-06	0.0282	0.825
SLFN11	1025	7880	15	8890	5	10	0.33	0.06	0.55	0.0295	33.33	11.47	3.84	5	1	0.000251	0.0295	0.854
EMR1	1786	7122	50	8859	16	33	0.42	0	0.77	0.0301	32	19.98	1.93	10	3	1.31e-06	0.0301	0.863
DNAH3	1506	7402	159	8752	36	120	0.8	0	1.48	0.0304	22.64	16.8	1.47	21	16	9.38e-10	0.0304	0.864
GALNS	1268	7429	50	8649	12	36	0.46	0	0.88	0.0342	24	14.52	1.95	9	9	0.00122	0.0342	0.947
ENPP3	1092	7801	42	8852	12	29	0.73	0.26	1.1	0.00341	28.57	12.2	2.96	5	4	0.0342	0.0342	0.947
ARMC4	933	6495	75	7355	15	58	0.74	0	1.35	0.0343	20	12.48	1.8	10	11	0.000198	0.0343	0.947
SI	1512	7368	213	8673	46	161	0.88	-0.04	1.63	0.0346	21.6	16.9	1.39	27	24	2.98e-11	0.0346	0.947
SLC5A9	912	7993	65	8840	12	53	0.61	0	1.22	0.031	18.46	10.18	1.98	7	14	0.0355	0.0355	0.954
TECTA	1584	7315	69	8830	19	50	0.54	0	0.96	0.0359	27.54	17.72	1.75	11	8	0.000105	0.0359	0.954
GABRR2	1097	7339	15	8421	5	10	0.31	0	0.52	0.0364	33.33	12.97	3.35	4	1	0.00412	0.0364	0.954
NCOR1	1937	5732	32	7637	13	19	0.35	0	0.66	0.0365	40.62	25.19	2.02	11	1	1.24e-10	0.0365	0.954
LEPRE1	957	7951	18	8890	5	13	0.35	0	0.59	0.0365	27.78	10.71	3.2	5	1	7.72e-05	0.0365	0.954
SMPD3	1132	6994	19	8107	6	13	0.41	0	0.62	0.0368	31.58	13.89	2.85	6	1	9.62e-06	0.0368	0.954
FLCN	2176	6341	79	8439	27	51	0.49	-0.03	0.9	0.0374	34.18	25.47	1.54	15	8	6.92e-06	0.0374	0.954
ABCC2	1616	7292	206	8706	46	156	0.76	-0.04	1.55	0.0374	22.33	18.03	1.33	28	27	1.36e-10	0.0374	0.954
KATNAL2	1570	7330	52	8848	15	37	0.46	0	0.81	0.0382	28.85	17.57	1.89	14	10	1e-06	0.0382	0.962
ABCC3	1427	7453	147	8735	32	113	0.75	-0.04	1.38	0.0388	21.77	15.97	1.48	19	18	7.83e-08	0.0388	0.962
ACLY	915	7963	54	8824	11	43	0.73	0.12	1.16	0.017	20.37	10.24	2.23	5	7	0.0397	0.0397	0.962
PANK4	1402	7374	36	8740	13	23	0.68	0.25	0.93	0.00205	36.11	15.89	2.97	8	7	0.0399	0.0399	0.962
PCDHB14	1392	7435	21	8806	7	14	0.34	0	0.55	0.0401	33.33	15.73	2.67	2	0	0.0272	0.0401	0.962
TULP2	1799	6429	42	8186	14	28	0.36	0	0.71	0.0402	33.33	21.81	1.79	9	9	0.0275	0.0402	0.962
GCAT	948	7825	40	8734	8	31	0.47	0	0.83	0.0402	20	10.76	2.13	6	7	0.00713	0.0402	0.962
ANO5	899	7991	42	8849	8	33	0.49	0	0.87	0.0403	19.05	10.07	2.15	6	3	7.58e-05	0.0403	0.962
SCN2B	1548	7062	15	8595	6	9	0.24	0	0.47	0.0411	40	17.94	3.04	4	1	0.0121	0.0411	0.963
TIAM2	2082	6827	20	8889	9	11	0.25	0.03	0.5	0.0289	45	23.32	2.68	6	3	0.0415	0.0415	0.963
TEX15	1294	7614	23	8885	7	16	0.36	0	0.59	0.0416	30.43	14.49	2.57	3	1	0.0274	0.0416	0.963
KIF24	1616	6847	38	8425	12	26	0.38	0	0.69	0.0422	31.58	19.04	1.96	7	6	0.0198	0.0422	0.963
GPSM2	1216	6279	38	7457	12	26	0.59	0.1	0.98	0.0186	31.58	16.15	2.38	7	7	0.0423	0.0423	0.963
DCBLD1	976	5703	44	6636	11	32	0.6	0	1.08	0.0423	25	14.54	2.01	8	8	0.00341	0.0423	0.963
TNN	1981	6924	39	8866	14	25	0.32	0	0.65	0.0427	35.9	22.19	1.96	7	3	0.00191	0.0427	0.963
WDR91	1361	7532	18	8875	6	12	0.26	0	0.52	0.043	33.33	15.27	2.77	5	1	0.000351	0.043	0.963
CATSPER3	1149	7639	65	8723	14	51	0.5	-0.05	1	0.0435	21.54	13.01	1.83	9	4	8.38e-07	0.0435	0.963
ABCC11	1323	6036	118	7245	28	86	0.74	-0.05	1.43	0.0436	23.73	17.87	1.49	16	20	0.000241	0.0436	0.963
MYH2	1298	4866	146	6020	40	104	0.88	-0.1	1.81	0.0461	27.4	20.9	1.44	25	12	1.16e-13	0.0461	1
AIM1	1878	7031	55	8854	18	37	0.4	0	0.81	0.0331	32.73	21.01	1.82	6	5	0.0462	0.0462	1
CNTN2	1117	7661	28	8750	7	21	0.41	0	0.67	0.0465	25	12.69	2.29	4	2	0.00799	0.0465	1
SMPDL3B	1209	7497	53	8654	12	40	0.48	-0.05	0.86	0.047	22.64	13.83	1.86	7	9	0.0161	0.047	1
ERICH1	1272	7546	6	8812	3	3	0.18	0	0.28	0.0477	50	14.4	5.93	3	0	0.00708	0.0477	1
NF1	1420	7488	31	8877	9	22	0.34	0	0.67	0.0481	29.03	15.9	2.16	6	1	1.28e-05	0.0481	1
MATK	1585	7210	12	8783	5	7	0.23	0	0.38	0.0488	41.67	17.99	3.25	3	0	0.00423	0.0488	1
ZNF468	1112	7611	11	8712	4	7	0.31	0	0.41	0.0386	36.36	12.72	3.91	3	1	0.0488	0.0488	1
FBN3	2573	6334	216	8695	73	139	0.6	-0.08	1.34	0.049	33.8	28.75	1.29	35	25	1.05e-08	0.049	1
POSTN	1466	6461	90	7838	23	66	0.59	-0.04	1.13	0.0499	25.56	18.41	1.54	15	10	2.65e-07	0.0499	1
ATP8B4	1196	7712	103	8807	20	81	0.58	-0.05	1.21	0.0507	19.42	13.35	1.59	15	18	2.62e-06	0.0507	1
FREM2	2568	6340	21	8887	10	11	0.22	0	0.44	0.0509	47.62	28.78	2.24	6	2	0.0143	0.0509	1
SLC2A4	3303	5587	20	8870	12	8	0.24	0.02	0.43	0.0287	60	37.1	2.54	5	1	0.0512	0.0512	1
GJB3	1115	6889	41	7963	10	31	0.42	-0.05	0.83	0.0515	24.39	13.88	1.99	7	5	0.000764	0.0515	1
PLEKHG1	2007	6868	16	8859	7	9	0.19	0	0.39	0.0517	43.75	22.58	2.66	4	1	0.0214	0.0517	1
MYO9A	897	8007	175	8734	24	146	0.87	-0.12	1.8	0.0521	13.71	10	1.47	10	20	0.00121	0.0521	1
SERPINA5	1190	7012	36	8167	9	26	0.39	-0.05	0.79	0.0522	25	14.46	2.04	5	3	0.00523	0.0522	1
HPS3	1400	7507	22	8885	7	15	0.34	0	0.55	0.0522	31.82	15.68	2.5	5	1	0.000318	0.0522	1
MFSD6L	1544	5078	39	6583	14	25	0.42	-0.04	0.84	0.0534	35.9	23.24	1.84	8	4	0.00162	0.0534	1
SBNO1	941	7967	44	8867	8	33	0.48	-0.06	0.83	0.054	18.18	10.52	2.05	5	6	0.0162	0.054	1
ABCA12	1408	7501	129	8782	27	100	0.59	-0.08	1.22	0.0543	20.93	15.73	1.44	13	18	0.000612	0.0543	1
SLC2A11	1015	7506	28	8493	7	21	0.45	0	0.78	0.0351	25	11.87	2.47	5	6	0.0545	0.0545	1
VPS13D	1329	7579	27	8881	8	19	0.35	0	0.62	0.0427	29.63	14.87	2.4	4	3	0.0562	0.0562	1
GARNL3	1230	7568	41	8758	12	28	0.57	0.19	0.95	0.007	29.27	13.91	2.64	8	10	0.0562	0.0562	1
HEMGN	994	6942	7	7929	3	4	0.23	0	0.35	0.0563	42.86	12.5	5.24	2	0	0.0523	0.0563	1
SLC4A7	1480	7397	44	8834	14	29	0.57	0.16	0.89	0.00778	31.82	16.59	2.41	7	7	0.0566	0.0566	1
ABCA8	929	7679	142	8470	21	117	0.72	-0.12	1.57	0.0574	14.79	10.72	1.48	13	24	9.75e-05	0.0574	1
KRT14	1512	7395	35	8872	10	25	0.32	-0.04	0.64	0.0575	28.57	16.93	1.96	7	3	0.00016	0.0575	1
ZNF471	1600	7293	27	8866	10	17	0.38	0.08	0.69	0.0129	37.04	17.93	2.68	3	1	0.0575	0.0575	1
IQGAP2	2394	6515	47	8862	18	29	0.29	-0.03	0.63	0.0578	38.3	26.81	1.69	7	3	0.00413	0.0578	1
WDR63	1415	7493	10	8898	4	6	0.25	0	0.34	0.0579	40	15.86	3.53	2	0	0.0441	0.0579	1
CRAT	1320	7589	58	8852	14	43	0.44	-0.04	0.89	0.0579	24.14	14.75	1.87	9	8	0.0006	0.0579	1
KLKB1	2151	6694	38	8808	14	23	0.31	-0.03	0.58	0.0582	36.84	24.26	1.89	6	3	0.0147	0.0582	1
ENTPD4	1393	6019	20	7392	7	13	0.27	0	0.53	0.0585	35	18.75	2.33	3	1	0.0455	0.0585	1
DPYSL4	1939	6790	26	8704	10	15	0.33	0.03	0.53	0.0299	38.46	22.16	2.33	6	4	0.0589	0.0589	1
SLC26A2	1174	7734	96	8814	18	76	0.59	-0.1	1.13	0.0591	18.75	13.12	1.56	12	13	1.24e-05	0.0591	1
OR52W1	1512	7396	9	8899	4	5	0.24	0	0.32	0.0599	44.44	16.95	3.91	2	0	0.0586	0.0599	1
GPR133	1634	7269	22	8882	8	13	0.3	0.04	0.52	0.0285	36.36	18.31	2.74	4	2	0.06	0.06	1
TNFRSF10B	1579	7282	31	8831	9	21	0.31	-0.04	0.58	0.06	29.03	17.78	1.98	6	4	0.00715	0.06	1
PARVG	1040	7852	28	8864	7	21	0.44	0	0.76	0.0379	25	11.65	2.52	4	4	0.0605	0.0605	1
IRF3	964	7375	32	8307	7	25	0.47	-0.06	0.76	0.0605	21.88	11.52	2.14	5	6	0.0273	0.0605	1
AIRE	1248	7244	30	8462	8	22	0.38	-0.05	0.66	0.0608	26.67	14.65	2.11	5	4	0.0178	0.0608	1
ABCB8	1782	7088	84	8788	23	59	0.42	-0.11	0.91	0.0613	27.38	20.02	1.55	10	12	0.0167	0.0613	1
ZNF620	940	5140	12	6069	4	7	0.38	0	0.5	0.0618	33.33	15.42	3.12	3	1	0.0488	0.0618	1
MRE11A	1144	7743	40	8847	9	31	0.4	-0.05	0.75	0.0623	22.5	12.83	1.97	6	5	0.00287	0.0623	1
PYGM	934	7968	123	8779	19	104	0.72	-0.12	1.44	0.0626	15.45	10.42	1.56	15	18	3.08e-08	0.0626	1
PAPLN	1332	7544	29	8848	8	20	0.35	-0.04	0.62	0.0631	27.59	14.96	2.27	4	2	0.0154	0.0631	1
PPP1R12C	1141	7080	12	8209	4	8	0.31	0	0.41	0.0633	33.33	13.85	3.1	3	1	0.0355	0.0633	1
MYO1C	2713	6194	74	8834	30	43	0.42	0	0.82	0.0327	40.54	30.37	1.59	14	13	0.0634	0.0634	1
UGT1A9	1636	7111	9	8738	4	5	0.15	0	0.3	0.0636	44.44	18.68	3.48	2	0	0.0586	0.0636	1
FBN1	923	7985	89	8820	15	73	0.6	-0.12	1.27	0.0637	16.85	10.29	1.78	10	10	1.16e-05	0.0637	1
LDLR	1381	7525	80	8826	18	62	0.51	-0.09	0.99	0.0639	22.5	15.44	1.58	9	9	0.000877	0.0639	1
CHD3	2273	6512	38	8748	14	23	0.3	-0.06	0.56	0.0643	36.84	25.82	1.74	6	3	0.0147	0.0643	1
TMEM180	1921	6822	39	8704	13	26	0.33	-0.07	0.6	0.0654	33.33	21.92	1.78	6	1	5.98e-05	0.0654	1
CHRNA10	1290	7605	31	8864	9	22	0.45	0.05	0.73	0.026	29.03	14.45	2.41	5	5	0.0661	0.0661	1
MBD1	1482	7331	42	8772	11	30	0.32	-0.08	0.69	0.0661	26.19	16.77	1.81	5	3	0.00732	0.0661	1
KLK12	1412	7490	15	8887	5	10	0.25	0	0.42	0.0669	33.33	15.83	2.65	2	0	0.0274	0.0669	1
DPYD	1031	7790	93	8728	16	77	0.55	-0.11	1.21	0.0673	17.2	11.63	1.57	8	14	0.00695	0.0673	1
FGA	1352	7453	66	8739	15	51	0.44	-0.09	0.87	0.0676	22.73	15.3	1.62	7	7	0.00447	0.0676	1
USP6	2547	6354	19	8882	9	10	0.22	-0.03	0.38	0.0677	47.37	28.57	2.25	7	2	0.00194	0.0677	1
DSP	1887	7022	77	8833	22	54	0.4	-0.1	0.84	0.0683	28.57	21.11	1.52	15	7	1.72e-08	0.0683	1
SETX	1521	7388	152	8761	33	115	0.55	-0.12	1.27	0.0683	21.71	16.98	1.39	11	19	0.0198	0.0683	1
MYH4	1770	4814	189	6397	61	126	0.77	-0.19	1.66	0.0688	32.28	26.72	1.32	38	17	5.98e-18	0.0688	1
COL15A1	1672	6768	105	8337	27	76	0.52	-0.11	1.04	0.0691	25.71	19.73	1.44	13	14	0.000806	0.0691	1
EEF1D	1372	7410	35	8748	9	25	0.35	-0.04	0.65	0.0693	25.71	15.58	1.94	4	3	0.0351	0.0693	1
TMPRSS9	1782	7064	46	8803	13	30	0.35	-0.07	0.63	0.0694	28.26	20.1	1.72	10	4	2.36e-06	0.0694	1
PKLR	927	7946	68	8806	11	56	0.48	-0.12	1.02	0.0695	16.18	10.4	1.68	7	12	0.00672	0.0695	1
PRSS55	1637	7212	55	8795	15	39	0.37	-0.07	0.75	0.0699	27.27	18.44	1.69	6	3	0.00166	0.0699	1
PASK	1741	7091	49	8783	14	35	0.36	-0.07	0.68	0.0701	28.57	19.66	1.63	9	8	0.00275	0.0701	1
ALPL	1100	6011	40	7072	10	29	0.43	-0.11	0.86	0.0704	25	15.41	1.88	7	10	0.0501	0.0704	1
MAN1B1	1498	7358	23	8833	7	16	0.24	-0.04	0.48	0.0706	30.43	16.88	2.15	6	1	1.13e-05	0.0706	1
CGNL1	1339	7569	29	8879	8	21	0.35	-0.04	0.62	0.071	27.59	14.99	2.15	4	3	0.0412	0.071	1
KCNA10	908	7603	62	8449	18	44	1.36	0.8	1.97	7e-05	29.03	10.53	3.43	5	5	0.0731	0.0731	1
DNAH8	2285	6622	83	8826	27	54	0.35	-0.09	0.79	0.074	32.53	25.58	1.45	9	6	0.00377	0.074	1
CLCN6	1902	7007	83	8828	23	58	0.4	-0.1	0.84	0.0744	27.71	21.28	1.46	13	8	5.97e-06	0.0744	1
CHD5	2413	6437	65	8786	23	41	0.34	-0.09	0.71	0.0744	35.38	27.2	1.5	10	6	0.00189	0.0744	1
ALDOB	990	5399	74	6318	16	55	0.6	-0.18	1.26	0.0746	21.62	15.42	1.59	8	12	0.0211	0.0746	1
EPHX2	1776	6286	15	8047	6	9	0.22	-0.04	0.4	0.0749	40	22	2.36	3	0	0.00376	0.0749	1
SLC43A2	1362	7426	11	8777	4	7	0.17	0	0.35	0.0764	36.36	15.47	3.12	4	2	0.0358	0.0764	1
TP53	2873	6033	75	8831	31	44	0.31	-0.08	0.72	0.0771	41.33	32.18	1.48	24	4	4.69e-18	0.0771	1
DNAJC6	900	6682	81	7503	14	65	0.63	-0.19	1.26	0.078	17.28	11.81	1.6	6	11	0.0335	0.078	1
PARK2	1358	7547	67	8838	15	52	0.43	-0.13	0.87	0.078	22.39	15.2	1.6	9	12	0.00494	0.078	1
CCS	950	7950	22	8878	5	17	0.35	-0.06	0.59	0.0781	22.73	10.64	2.46	3	2	0.0386	0.0781	1
TECTB	1206	6940	34	8112	10	24	0.49	0.05	0.83	0.0228	29.41	14.74	2.4	6	7	0.0782	0.0782	1
TRIM52	1046	4934	6	5974	3	3	0.23	0	0.35	0.077	50	17.46	4.72	2	0	0.0789	0.0789	1
ALG11	1214	6806	21	8000	6	14	0.29	-0.05	0.58	0.0792	28.57	15.1	2.4	3	1	0.0257	0.0792	1
SLC22A1	1916	6930	29	8817	10	19	0.27	-0.07	0.53	0.0794	34.48	21.62	1.9	6	3	0.00593	0.0794	1
SLC5A10	1699	6925	65	8560	17	47	0.37	-0.11	0.77	0.0812	26.15	19.65	1.47	11	7	1.47e-05	0.0812	1
SLC1A5	929	6522	8	7443	4	4	0.37	0.12	0.49	0.011	50	12.43	7.02	2	0	0.0815	0.0815	1
GBGT1	1676	7215	8	8883	4	4	0.15	0	0.29	0.0613	50	18.82	4.3	2	0	0.0815	0.0815	1
OR10X1	1192	7013	8	8197	4	4	0.29	0.1	0.39	0.0173	50	14.49	5.88	2	0	0.0815	0.0815	1
ZNF347	1316	7564	27	8853	7	20	0.27	-0.09	0.54	0.0816	25.93	14.79	2.01	5	3	0.00461	0.0816	1
LPP	1215	7582	29	8769	7	21	0.29	-0.1	0.57	0.0817	24.14	13.78	2.08	4	2	0.00799	0.0817	1
PSG5	998	6744	13	7729	4	9	0.23	-0.06	0.46	0.0822	30.77	12.86	3	2	0	0.0226	0.0822	1
C2CD3	1041	5941	44	6940	10	32	0.45	-0.11	0.9	0.0827	22.73	14.86	1.78	7	8	0.00901	0.0827	1
LMAN2	1274	7584	22	8836	6	16	0.28	-0.05	0.55	0.0828	27.27	14.35	2.23	3	1	0.0183	0.0828	1
ECM1	1335	7566	32	8870	10	21	0.44	0.09	0.79	0.0133	31.25	14.94	2.7	4	3	0.0831	0.0831	1
FBLN1	1184	7721	45	8860	10	35	0.39	-0.1	0.78	0.0839	22.22	13.25	1.86	5	6	0.0338	0.0839	1
MUT	1021	7848	105	8765	17	87	0.55	-0.17	1.22	0.084	16.19	11.45	1.5	10	16	0.000532	0.084	1
LMAN1	1270	6967	7	8230	3	4	0.19	0	0.28	0.0841	42.86	15.39	4.11	3	0	0.0037	0.0841	1
TAAR5	907	7204	12	8099	5	7	0.5	0.12	0.62	0.0059	41.67	11.14	5.67	3	1	0.0841	0.0841	1
LIPA	1448	6315	13	7750	5	8	0.25	-0.04	0.42	0.0845	38.46	18.62	2.73	3	1	0.0623	0.0845	1
PCDHB11	1821	7088	15	8895	7	7	0.28	0.07	0.48	0.0114	46.67	20.39	3.89	2	0	0.085	0.085	1
ACACB	1822	7081	192	8713	47	143	0.55	-0.17	1.28	0.0852	24.48	20.37	1.28	23	31	5.94e-05	0.0852	1
F10	1840	7066	60	8847	17	42	0.34	-0.1	0.72	0.0862	28.33	20.61	1.55	8	10	0.0502	0.0862	1
TH	930	7450	41	8339	8	33	0.36	-0.12	0.85	0.0868	19.51	11.06	1.94	4	4	0.0222	0.0868	1
LRBA	1348	7561	42	8867	10	32	0.35	-0.09	0.7	0.0878	23.81	15.09	1.75	5	5	0.0245	0.0878	1
OTOF	1266	7635	128	8774	24	103	0.55	-0.23	1.2	0.0884	18.75	14.16	1.41	11	22	0.0103	0.0884	1
KCNH6	1734	7115	178	8674	42	133	0.57	-0.18	1.26	0.0893	23.6	19.51	1.3	26	38	1.46e-05	0.0893	1
COL3A1	1120	7789	51	8859	10	40	0.41	-0.1	0.82	0.0896	19.61	12.53	1.74	4	5	0.0489	0.0896	1
HLCS	1142	7757	89	8811	16	72	0.5	-0.15	1.05	0.0898	17.98	12.78	1.51	9	18	0.0136	0.0898	1
COL4A1	2820	6088	133	8776	57	75	0.78	0.23	1.32	0.00305	42.86	31.48	1.64	24	24	0.0904	0.0904	1
ISX	1173	7698	39	8834	8	29	0.29	-0.1	0.69	0.0905	20.51	13.19	1.81	5	7	0.0489	0.0905	1
CCBE1	1360	7547	43	8865	10	32	0.35	-0.09	0.69	0.0906	23.26	15.23	1.73	6	4	0.0016	0.0906	1
HKDC1	1711	7198	98	8813	24	72	0.43	-0.14	0.94	0.0911	24.49	19.14	1.4	15	11	6.07e-07	0.0911	1
STAT5A	1160	6696	16	7840	5	11	0.3	-0.05	0.51	0.0912	31.25	14.73	2.62	5	1	0.000164	0.0912	1
SLC7A6	1079	7242	29	8292	8	21	0.43	0	0.75	0.0314	27.59	12.92	2.56	4	4	0.0918	0.0918	1
USP45	1565	7344	23	8886	7	16	0.23	-0.08	0.47	0.092	30.43	17.53	2.05	4	3	0.0618	0.092	1
PTS	1306	7602	13	8895	4	9	0.18	-0.04	0.36	0.0933	30.77	14.64	2.59	3	1	0.0266	0.0933	1
GRM6	1683	7223	72	8836	18	52	0.37	-0.15	0.81	0.094	25	18.84	1.49	9	15	0.0728	0.094	1
TMPRSS6	1757	7144	42	8860	12	29	0.28	-0.11	0.6	0.0942	28.57	19.7	1.68	7	7	0.0243	0.0942	1
CASP5	1829	6883	12	8700	5	7	0.21	-0.03	0.35	0.0948	41.67	20.97	2.69	2	0	0.0495	0.0948	1
AMICA1	1656	6922	40	8540	11	27	0.3	-0.11	0.6	0.0949	27.5	19.26	1.7	6	4	0.0066	0.0949	1
MYH9	1142	7746	80	8809	14	65	0.4	-0.15	0.95	0.0952	17.5	12.81	1.46	7	13	0.0204	0.0952	1
ASPA	3152	5746	69	8829	30	39	0.29	-0.12	0.66	0.0975	43.48	35.36	1.4	19	4	3.42e-11	0.0975	1
KIF14	1202	7693	36	8859	8	28	0.29	-0.1	0.67	0.0979	22.22	13.48	1.83	7	6	0.000662	0.0979	1
SLC10A2	990	7773	30	8733	6	24	0.34	-0.11	0.68	0.0988	20	11.27	1.96	5	4	0.00287	0.0988	1
DNAJC16	1785	5679	14	7450	6	8	0.22	-0.07	0.4	0.0955	42.86	23.88	2.39	4	2	0.0991	0.0991	1
RPE65	1085	7661	53	8694	10	42	0.42	-0.16	0.84	0.1	18.87	12.36	1.68	5	5	0.00809	0.1	1
ZNFX1	1203	7520	36	8688	8	27	0.29	-0.1	0.67	0.101	22.22	13.75	1.85	3	3	0.0919	0.101	1
TKT	1773	7090	37	8826	11	26	0.28	-0.11	0.56	0.102	29.73	19.96	1.69	4	3	0.0592	0.102	1
FOXK2	909	7677	59	8528	12	46	0.74	0.12	1.23	0.0157	20.34	10.52	2.2	6	12	0.103	0.103	1
CAMKK1	2998	5894	5	8887	4	1	0.1	0	0.2	0.0399	80	33.69	7.86	3	0	0.104	0.104	1
C9orf43	1741	7039	10	8771	4	5	0.14	0	0.29	0.0845	40	19.8	3.23	3	1	0.104	0.104	1
TXK	1098	7811	21	8888	5	16	0.31	-0.1	0.52	0.104	23.81	12.3	2.22	3	1	0.0112	0.104	1
ALOX15B	3094	5637	68	8665	29	37	0.25	-0.13	0.63	0.106	42.65	35.37	1.43	18	14	0.0125	0.106	1
HINT2	969	3804	13	4760	5	8	0.26	-0.13	0.65	0.107	38.46	20.25	2.45	5	2	0.00763	0.107	1
ABLIM1	1295	7382	12	8665	4	8	0.18	-0.05	0.36	0.107	33.33	14.9	2.85	2	0	0.0276	0.107	1
ENO3	2964	5739	42	8661	19	23	0.2	-0.1	0.51	0.108	45.24	34	1.6	9	5	0.0241	0.108	1
BCO2	1712	7196	69	8839	18	51	0.36	-0.14	0.76	0.108	26.09	19.17	1.48	8	7	0.00318	0.108	1
PROP1	938	7953	22	8870	9	12	0.83	0.48	1.07	0.000164	40.91	10.47	6.36	4	2	0.108	0.108	1
KRT33B	1086	7320	43	8363	9	34	0.32	-0.16	0.74	0.108	20.93	12.88	1.78	5	6	0.0243	0.108	1
ALOX15	2539	6354	42	8852	16	25	0.22	-0.11	0.52	0.109	38.1	28.5	1.6	9	4	0.000883	0.109	1
ATP8B1	1176	7731	31	8876	7	24	0.29	-0.1	0.59	0.109	22.58	13.17	1.92	4	0	1.05e-05	0.109	1
FOXA3	1214	7177	15	8376	5	10	0.29	0	0.48	0.0577	33.33	14.43	2.96	5	5	0.109	0.109	1
THAP3	1268	7556	26	8798	9	17	0.46	0.14	0.74	0.0096	34.62	14.31	3.15	4	3	0.111	0.111	1
CES5A	1552	7349	48	8855	12	34	0.31	-0.12	0.66	0.111	25	17.39	1.67	7	5	0.00168	0.111	1
ATP12A	1687	7048	98	8637	24	74	0.37	-0.18	0.92	0.111	24.49	19.25	1.35	9	15	0.0562	0.111	1
SUCLA2	930	7594	26	8498	5	21	0.36	-0.12	0.6	0.111	19.23	10.88	1.94	4	6	0.0669	0.111	1
RNF10	1164	7744	45	8863	9	36	0.3	-0.15	0.69	0.112	20	13.03	1.66	7	5	0.000127	0.112	1
PGM2	932	7575	47	8461	8	38	0.36	-0.18	0.84	0.112	17.02	10.92	1.71	2	2	0.11	0.112	1
SERPINB4	1621	7286	39	8868	11	28	0.3	-0.11	0.6	0.112	28.21	18.16	1.77	6	4	0.00552	0.112	1
CRB2	1083	7818	19	8882	6	13	0.42	0.05	0.63	0.0223	31.58	12.13	3.33	3	2	0.113	0.113	1
ATRIP	1714	5267	12	6969	7	5	0.31	0.08	0.54	0.013	58.33	24.49	4.3	4	1	0.114	0.114	1
DNTT	938	7971	20	8889	7	13	0.6	0.24	0.83	0.00305	35	10.47	4.58	4	3	0.114	0.114	1
KLHL3	1091	7467	9	8549	5	4	0.42	0.16	0.53	0.00285	55.56	12.7	8.56	2	0	0.114	0.114	1
LAMA5	1326	7536	50	8812	11	39	0.35	-0.13	0.71	0.114	22	14.92	1.6	8	11	0.00716	0.114	1
SIPA1L1	910	7890	48	8753	12	35	0.86	0.31	1.35	0.00294	25	10.26	2.97	5	7	0.114	0.114	1
FAN1	901	6914	77	7741	12	62	0.5	-0.25	1.07	0.114	15.58	11.48	1.49	5	10	0.0512	0.114	1
CP	1506	7401	142	8768	29	110	0.48	-0.28	1.12	0.115	20.42	16.85	1.3	12	31	0.115	0.115	1
ISYNA1	908	7742	18	8632	4	14	0.25	-0.12	0.49	0.115	22.22	10.47	2.44	2	1	0.0815	0.115	1
ATE1	1083	7820	5	8898	2	3	0.21	0	0.21	0.116	40	12.15	4.81	2	0	0.043	0.116	1
TACR2	1363	7512	8	8867	3	5	0.17	-0.04	0.26	0.117	37.5	15.34	3.31	2	0	0.0372	0.117	1
SERPINB8	1479	7302	73	8708	19	54	0.57	0.04	1.02	0.0298	26.03	16.77	1.74	6	9	0.117	0.117	1
GRB7	1453	7455	12	8897	5	6	0.25	0.04	0.41	0.0297	41.67	16.28	4.28	3	1	0.117	0.117	1
ATP9B	1457	7449	74	8833	19	54	0.57	0.04	1.07	0.0217	25.68	16.28	1.8	6	9	0.117	0.117	1
IRAK2	1723	7175	32	8866	9	23	0.22	-0.11	0.5	0.117	28.12	19.33	1.63	3	2	0.0775	0.117	1
COL11A1	1803	7106	117	8792	29	88	0.42	-0.21	0.94	0.117	24.79	20.18	1.3	16	13	1.33e-06	0.117	1
VNN1	1001	6602	37	7566	8	29	0.35	-0.17	0.81	0.118	21.62	13.12	1.82	6	6	0.00471	0.118	1
SLC29A1	1313	7372	18	8667	5	13	0.18	-0.09	0.45	0.119	27.78	15.09	2.16	3	1	0.0192	0.119	1
NLRP8	1679	7080	81	8678	20	61	0.37	-0.18	0.85	0.119	24.69	19.12	1.38	11	14	0.00371	0.119	1
TBC1D9B	1343	6679	24	7998	7	17	0.27	-0.09	0.54	0.0879	29.17	16.7	2.05	5	6	0.119	0.119	1
PRKCSH	962	7924	18	8868	4	14	0.23	-0.12	0.47	0.12	22.22	10.8	2.35	2	0	0.0104	0.12	1
C21orf33	909	7996	18	8887	4	14	0.25	-0.12	0.49	0.121	22.22	10.18	2.51	3	3	0.0867	0.121	1
PEX11G	1921	6958	7	8872	4	3	0.2	0	0.27	0.0412	57.14	21.61	4.83	2	0	0.121	0.121	1
TMPRSS3	1667	7154	61	8763	15	43	0.3	-0.15	0.7	0.118	24.59	18.85	1.5	5	7	0.122	0.122	1
EPB41L2	1016	5255	59	6214	13	44	0.47	-0.23	1.06	0.122	22.03	16.14	1.53	6	5	0.00416	0.122	1
RET	1106	7779	85	8803	14	68	0.41	-0.21	0.98	0.122	16.47	12.4	1.45	7	15	0.0332	0.122	1
CREB3	2162	6746	54	8855	17	36	0.24	-0.12	0.61	0.123	31.48	24.22	1.47	9	8	0.0111	0.123	1
VPS13B	1111	7751	78	8787	13	62	0.41	-0.21	0.93	0.125	16.67	12.5	1.46	8	14	0.00607	0.125	1
SHPK	2182	6726	18	8890	8	10	0.24	0	0.42	0.0442	44.44	24.45	2.47	4	2	0.126	0.126	1
CPT1B	1289	7318	77	8532	15	60	0.36	-0.23	0.87	0.126	19.48	14.93	1.42	14	10	1.69e-09	0.126	1
STK10	1717	7190	7	8900	3	4	0.14	-0.04	0.22	0.127	42.86	19.26	3.14	3	1	0.0837	0.127	1
TUB	932	7967	52	8849	8	42	0.36	-0.18	0.84	0.128	15.38	10.44	1.63	6	12	0.0216	0.128	1
ZNF280A	945	7283	6	8222	2	4	0.24	0	0.24	0.128	33.33	11.47	3.85	2	0	0.028	0.128	1
FYCO1	2098	6799	15	8882	6	9	0.12	-0.06	0.31	0.129	40	23.55	2.16	4	1	0.0121	0.129	1
TRIM16	1467	6250	7	7710	3	4	0.17	-0.04	0.25	0.129	42.86	18.99	3.2	2	0	0.0523	0.129	1
EXTL1	1608	7226	58	8777	14	43	0.3	-0.15	0.68	0.129	24.14	18.16	1.46	9	15	0.044	0.129	1
TREX1	1506	5311	27	6790	9	18	0.26	-0.13	0.6	0.13	33.33	22.05	1.76	4	2	0.0326	0.13	1
PRKD2	1001	7898	11	8888	3	8	0.23	0	0.34	0.0927	27.27	11.23	2.96	2	1	0.132	0.132	1
MAP3K5	1069	6616	6	7680	3	2	0.22	0.11	0.33	0.0192	50	13.88	9.28	2	0	0.132	0.132	1
CPXM2	1665	7244	56	8853	15	41	0.37	-0.11	0.74	0.0883	26.79	18.64	1.59	6	9	0.132	0.132	1
SLC6A2	1238	7507	31	8714	7	24	0.28	-0.14	0.56	0.132	22.58	14.13	1.77	4	4	0.0397	0.132	1
PRDM2	1478	7328	5	8801	3	2	0.16	0	0.24	0.0389	60	16.76	7.44	2	0	0.132	0.132	1
GSR	1160	7441	20	8581	5	15	0.2	-0.1	0.5	0.132	25	13.46	2.14	3	3	0.123	0.132	1
FN1	2133	6776	15	8894	6	9	0.12	-0.06	0.31	0.133	40	23.91	2.12	2	0	0.0444	0.133	1
OPA1	1276	7433	59	8650	13	46	0.46	-0.09	0.87	0.0784	22.03	14.6	1.65	5	9	0.134	0.134	1
NALCN	2441	6460	97	8804	32	65	0.28	-0.2	0.76	0.134	32.99	27.36	1.3	13	12	0.00509	0.134	1
DNAI2	2144	6757	30	8872	10	19	0.18	-0.09	0.43	0.134	33.33	24.05	1.66	5	3	0.0298	0.134	1
COL19A1	1927	6982	110	8799	29	81	0.33	-0.23	0.89	0.134	26.36	21.57	1.3	11	17	0.0397	0.134	1
RFT1	883	6777	30	7630	6	24	0.38	-0.13	0.7	0.134	20	11.49	1.92	3	3	0.062	0.134	1
UMPS	1446	7222	12	8656	4	8	0.17	-0.08	0.33	0.118	33.33	16.66	2.5	3	2	0.135	0.135	1
SHBG	3035	5872	29	8878	13	16	0.15	-0.1	0.4	0.135	44.83	34.04	1.57	7	2	0.00196	0.135	1
PCSK9	963	7933	19	8877	5	14	0.35	0	0.58	0.0508	26.32	10.79	2.94	4	5	0.136	0.136	1
ALDOC	1485	6861	33	8313	11	22	0.41	0.04	0.74	0.0236	33.33	17.73	2.31	5	5	0.136	0.136	1
ADAMTS13	1843	6938	21	8760	7	14	0.21	-0.1	0.41	0.136	33.33	20.96	1.88	4	3	0.092	0.136	1
SDK1	1568	7337	36	8871	9	25	0.23	-0.12	0.54	0.137	25	17.57	1.68	4	2	0.0112	0.137	1
CTNS	2466	6442	72	8836	24	48	0.28	-0.17	0.64	0.137	33.33	27.64	1.31	13	7	2.11e-05	0.137	1
CDH3	1798	6982	19	8762	6	12	0.14	-0.07	0.35	0.137	31.58	20.45	1.94	3	2	0.135	0.137	1
NAV2	2303	6606	31	8879	11	19	0.18	-0.12	0.44	0.137	35.48	25.81	1.66	5	2	0.0113	0.137	1
OAT	1262	7397	33	8629	7	23	0.28	-0.14	0.56	0.138	21.21	14.54	1.78	7	4	5.45e-05	0.138	1
STK31	1285	7620	30	8875	7	23	0.27	-0.14	0.55	0.138	23.33	14.4	1.8	4	3	0.0194	0.138	1
EXTL3	933	6507	83	7358	14	68	0.49	-0.31	1.1	0.139	16.87	12.49	1.44	11	10	7.59e-07	0.139	1
DALRD3	1063	7510	14	8559	4	10	0.21	-0.05	0.43	0.0929	28.57	12.37	2.83	2	1	0.14	0.14	1
LMO7	2296	6612	33	8875	12	21	0.18	-0.12	0.47	0.14	36.36	25.74	1.65	5	4	0.107	0.14	1
NDST3	1109	7703	11	8802	3	7	0.21	-0.1	0.31	0.14	27.27	12.57	2.98	2	0	0.0215	0.14	1
CDX1	1567	7342	15	8894	5	10	0.15	-0.08	0.39	0.141	33.33	17.56	2.34	4	1	0.00412	0.141	1
CLDN9	901	7743	28	8616	6	22	0.37	-0.06	0.74	0.0734	21.43	10.39	2.34	3	4	0.141	0.141	1
HBE1	1228	7653	15	8866	4	11	0.19	-0.09	0.38	0.142	26.67	13.81	2.27	2	1	0.121	0.142	1
GRXCR2	993	7718	6	8705	2	4	0.11	-0.06	0.23	0.142	33.33	11.38	3.89	2	0	0.028	0.142	1
CECR1	1587	7165	30	8723	8	21	0.23	-0.12	0.5	0.142	26.67	18.1	1.72	6	4	0.00346	0.142	1
FRK	954	7253	18	8190	4	13	0.24	-0.12	0.47	0.143	22.22	11.6	2.34	3	3	0.104	0.143	1
ATAD3A	872	5350	32	6191	7	24	0.4	-0.2	0.8	0.143	21.88	13.97	1.79	4	5	0.0765	0.143	1
PYGB	1430	7473	131	8775	25	103	0.42	-0.29	1.04	0.143	19.08	16.01	1.27	9	20	0.0547	0.143	1
TALDO1	1173	6863	26	8010	6	20	0.2	-0.15	0.5	0.144	23.08	14.57	1.76	6	2	1.79e-05	0.144	1
ALKBH3	1092	7817	19	8890	5	14	0.31	-0.05	0.52	0.0753	26.32	12.23	2.56	3	3	0.144	0.144	1
ABCB6	1102	7802	70	8835	13	56	0.52	-0.1	0.98	0.0775	18.57	12.33	1.64	4	8	0.144	0.144	1
POMT1	1055	7851	72	8836	12	58	0.43	-0.27	0.91	0.144	16.67	11.8	1.54	9	7	3.82e-06	0.144	1
GLOD4	1574	5260	6	6828	3	3	0.17	-0.04	0.25	0.145	50	23.01	3.34	3	0	0.00708	0.145	1
SH3TC2	909	7968	52	8826	8	43	0.37	-0.25	0.8	0.145	15.38	10.21	1.63	4	3	0.00364	0.145	1
ABCA10	1462	7444	91	8817	19	70	0.33	-0.25	0.86	0.146	20.88	16.37	1.38	11	13	0.000356	0.146	1
PSEN2	878	7544	63	8359	10	53	0.38	-0.25	0.95	0.133	15.87	10.38	1.62	5	14	0.147	0.147	1
GNAT1	993	7089	18	8064	4	14	0.23	-0.11	0.46	0.148	22.22	12.26	2.04	3	2	0.0355	0.148	1
SH3BGR	939	7959	13	8885	3	10	0.24	-0.12	0.36	0.148	23.08	10.53	2.54	2	1	0.0923	0.148	1
LAMA1	2859	6048	100	8808	40	59	0.41	-0.05	0.88	0.0502	40	32	1.43	11	11	0.148	0.148	1
CTRB2	985	7719	6	8698	2	4	0.11	-0.06	0.23	0.149	33.33	11.3	3.92	2	0	0.028	0.149	1
INHBE	1034	7873	12	8895	3	9	0.22	-0.11	0.33	0.15	25	11.59	2.54	3	1	0.012	0.15	1
LZTR1	2157	6747	34	8871	11	22	0.18	-0.12	0.46	0.151	32.35	24.19	1.56	7	7	0.0595	0.151	1
POLI	1040	7087	11	8116	3	8	0.22	-0.11	0.33	0.152	27.27	12.78	2.56	2	0	0.0172	0.152	1
DNASE1	1213	7683	27	8870	6	20	0.19	-0.14	0.48	0.154	22.22	13.61	1.9	4	0	1.06e-05	0.154	1
KRT32	1763	7145	62	8846	16	46	0.28	-0.18	0.67	0.154	25.81	19.75	1.41	8	9	0.0117	0.154	1
LIMK2	1179	7283	46	8416	9	37	0.3	-0.2	0.69	0.152	19.57	13.9	1.5	5	11	0.155	0.155	1
FCN2	1497	7094	35	8556	11	24	0.4	0.04	0.73	0.0282	31.43	17.37	2.17	4	4	0.155	0.155	1
FHIT	1172	6974	15	8131	4	11	0.2	-0.1	0.4	0.156	26.67	14.36	2.16	2	0	0.016	0.156	1
NDOR1	1672	7175	33	8814	9	24	0.22	-0.15	0.52	0.157	27.27	18.87	1.61	5	2	0.00163	0.157	1
ABCG2	896	7989	76	8809	11	65	0.37	-0.25	0.99	0.143	14.47	10.05	1.51	5	16	0.158	0.158	1
LAIR1	1300	7356	5	8651	2	3	0.09	-0.05	0.18	0.159	40	15	3.77	2	0	0.043	0.159	1
LPL	1257	4447	28	5676	9	19	0.31	-0.2	0.71	0.159	32.14	21.99	1.68	3	2	0.12	0.159	1
CHRNA5	1080	7022	54	8049	10	43	0.32	-0.21	0.8	0.159	18.52	13.29	1.51	5	11	0.134	0.159	1
ABCA9	1233	7672	155	8753	25	127	0.47	-0.33	1.18	0.16	16.13	13.8	1.22	21	29	7.84e-10	0.16	1
IL12RB1	965	6064	34	6995	7	27	0.36	-0.24	0.72	0.161	20.59	13.7	1.63	3	4	0.124	0.161	1
BFSP1	910	7685	29	8568	5	22	0.25	-0.18	0.61	0.161	17.24	10.56	1.92	2	1	0.0535	0.161	1
KLHL17	1237	7511	14	8734	4	10	0.19	-0.09	0.38	0.161	28.57	14.12	2.43	4	2	0.0109	0.161	1
PDE4C	1519	7078	31	8566	8	23	0.24	-0.16	0.48	0.161	25.81	17.64	1.62	3	1	0.0154	0.161	1
GTF2H5	959	7325	10	8274	3	7	0.24	-0.06	0.35	0.0986	30	11.55	3.27	2	1	0.162	0.162	1
CYP4F11	1530	7092	50	8573	12	37	0.24	-0.2	0.64	0.162	24	17.71	1.5	5	7	0.0946	0.162	1
NDST1	979	7280	10	8249	3	7	0.23	-0.06	0.35	0.104	30	11.83	3.19	2	1	0.162	0.162	1
ARSG	1224	6952	20	8156	5	15	0.19	-0.14	0.48	0.163	25	14.95	1.89	4	4	0.0566	0.163	1
ECE2	1386	7520	81	8826	16	64	0.34	-0.26	0.81	0.163	19.75	15.52	1.36	9	17	0.0203	0.163	1
ZNF79	1903	6671	8	8566	4	4	0.14	0	0.27	0.0758	50	22.17	3.51	3	1	0.163	0.163	1
ZNF551	1012	6710	11	7711	3	8	0.23	-0.11	0.34	0.165	27.27	13.09	2.49	2	0	0.0172	0.165	1
ZNF749	1482	7335	13	8804	4	9	0.16	-0.08	0.32	0.163	30.77	16.79	2.2	2	1	0.165	0.165	1
ATP4A	1022	7588	69	8541	12	57	0.44	-0.17	1	0.102	17.39	11.83	1.56	5	13	0.165	0.165	1
ATP13A5	1818	7087	71	8835	18	52	0.28	-0.21	0.69	0.166	25.35	20.37	1.35	8	10	0.022	0.166	1
ANGEL1	1057	6843	16	7884	4	12	0.22	-0.11	0.44	0.166	25	13.36	2.16	2	1	0.105	0.166	1
CNTN6	1650	7156	53	8753	13	40	0.22	-0.19	0.63	0.166	24.53	18.7	1.41	7	4	0.000326	0.166	1
NEK4	2121	5585	28	7679	10	17	0.2	-0.13	0.46	0.166	35.71	27.49	1.55	5	1	0.00121	0.166	1
EVC2	1222	7228	60	8391	12	47	0.29	-0.24	0.77	0.166	20	14.42	1.51	8	14	0.019	0.166	1
FASTKD3	950	7776	17	8709	4	13	0.24	-0.06	0.47	0.098	23.53	10.86	2.52	1	0	0.166	0.166	1
DISP1	1178	7730	91	8819	16	73	0.39	-0.29	0.93	0.166	17.58	13.18	1.44	10	13	0.000225	0.166	1
ETHE1	1418	7488	17	8890	5	11	0.25	-0.08	0.42	0.1	29.41	15.89	2.4	2	1	0.167	0.167	1
SCN11A	1653	7256	154	8757	33	119	0.37	-0.33	1.04	0.168	21.43	18.5	1.22	15	30	0.0136	0.168	1
BMP1	1511	5808	12	7308	4	7	0.17	-0.08	0.33	0.171	33.33	20.62	2.2	2	0	0.0344	0.171	1
MTHFR	1865	7044	32	8878	9	22	0.2	-0.14	0.47	0.171	28.12	20.91	1.55	7	5	0.00266	0.171	1
GBP3	1318	7200	25	8493	6	19	0.18	-0.13	0.45	0.172	24	15.45	1.73	3	2	0.0463	0.172	1
COL17A1	2311	6595	139	8770	40	96	0.29	-0.26	0.85	0.173	28.78	25.9	1.19	19	10	1.02e-08	0.173	1
AMPD3	1241	7661	53	8852	10	40	0.28	-0.23	0.66	0.174	18.87	13.91	1.54	5	6	0.02	0.174	1
SLC6A20	1716	7180	35	8861	10	25	0.22	-0.11	0.54	0.127	28.57	19.25	1.67	3	3	0.176	0.176	1
WWP2	1489	7157	13	8633	4	9	0.16	-0.08	0.32	0.176	30.77	17.2	2.14	4	2	0.0156	0.176	1
OLFML2B	876	8030	46	8860	7	39	0.38	-0.25	0.76	0.176	15.22	9.81	1.65	4	6	0.0281	0.176	1
MMP1	1292	7597	37	8852	8	29	0.27	-0.18	0.54	0.176	21.62	14.51	1.62	6	3	0.000155	0.176	1
LECT1	972	7930	19	8883	4	15	0.23	-0.12	0.46	0.137	21.05	10.9	2.18	2	2	0.176	0.176	1
PCDH12	1733	7176	24	8885	7	17	0.14	-0.14	0.43	0.177	29.17	19.43	1.71	2	1	0.139	0.177	1
LAMB1	1296	7446	36	8706	8	28	0.27	-0.18	0.54	0.177	22.22	14.79	1.64	5	2	0.000446	0.177	1
KCNA7	1094	7263	49	8308	9	40	0.32	-0.26	0.74	0.177	18.37	13.06	1.49	6	13	0.0725	0.177	1
ZNF530	1262	7385	15	8632	4	11	0.19	-0.09	0.37	0.177	26.67	14.57	2.13	2	1	0.121	0.177	1
ACADM	1289	7560	45	8805	9	35	0.27	-0.18	0.64	0.178	20	14.54	1.51	5	5	0.0107	0.178	1
ACP2	1432	7477	5	8904	2	3	0.08	-0.08	0.17	0.178	40	16.06	3.48	2	0	0.043	0.178	1
RGL4	1263	7343	11	8595	4	7	0.19	0	0.37	0.0713	36.36	14.65	3.32	3	2	0.18	0.18	1
SLC25A19	1216	7691	11	8896	4	7	0.29	0	0.38	0.0406	36.36	13.62	3.61	3	2	0.18	0.18	1
SOAT1	1219	7435	11	8643	4	7	0.29	0	0.38	0.0501	36.36	14.06	3.49	3	2	0.18	0.18	1
PLB1	1616	7293	55	8854	17	38	0.53	0.11	0.94	0.0131	30.91	18.06	2.02	6	8	0.181	0.181	1
MYH11	1506	7376	164	8720	32	130	0.4	-0.36	1.08	0.181	19.51	16.9	1.21	13	25	0.00647	0.181	1
SARDH	1710	7184	55	8842	15	37	0.36	-0.07	0.72	0.0626	27.27	19.17	1.7	7	11	0.182	0.182	1
TRPM4	1301	6716	57	7961	12	44	0.28	-0.23	0.73	0.182	21.05	16.19	1.41	6	6	0.00624	0.182	1
MDN1	2567	6342	12	8898	5	6	0.11	-0.05	0.25	0.183	41.67	28.79	2.06	2	0	0.0631	0.183	1
PPWD1	1361	7541	27	8875	9	18	0.43	0.09	0.69	0.0117	33.33	15.23	2.77	2	1	0.184	0.184	1
MTMR6	1068	7700	60	8708	10	50	0.32	-0.27	0.75	0.184	16.67	12.15	1.44	4	5	0.0239	0.184	1
AGXT	1022	7189	32	8179	6	26	0.22	-0.22	0.56	0.184	18.75	12.42	1.62	4	5	0.0355	0.184	1
CPT2	1217	7057	83	8194	16	64	0.39	-0.24	0.92	0.149	19.28	14.66	1.45	7	18	0.184	0.184	1
POMGNT1	902	7945	32	8817	5	25	0.25	-0.19	0.62	0.184	15.62	10.17	1.76	3	2	0.0142	0.184	1
CELA2A	1825	7081	45	8861	12	33	0.21	-0.17	0.55	0.185	26.67	20.46	1.41	9	9	0.00235	0.185	1
LAMA4	2200	6709	40	8869	13	27	0.18	-0.15	0.48	0.185	32.5	24.66	1.47	7	8	0.0985	0.185	1
ALDH3A2	1635	6589	32	8192	12	20	0.46	0.08	0.76	0.0131	37.5	19.81	2.42	6	6	0.186	0.186	1
PAK6	1063	7772	48	8787	8	40	0.32	-0.21	0.64	0.187	16.67	12.01	1.46	5	9	0.036	0.187	1
MLC1	1651	7253	42	8862	12	30	0.3	-0.07	0.63	0.0865	28.57	18.49	1.76	4	5	0.187	0.187	1
SLC47A2	2674	5809	15	8468	7	8	0.11	-0.08	0.3	0.187	46.67	31.5	1.9	3	1	0.135	0.187	1
SDHD	1010	5772	14	6768	4	10	0.23	-0.12	0.47	0.168	28.57	14.86	2.29	3	3	0.188	0.188	1
CHI3L1	1306	7599	17	8889	4	12	0.18	-0.09	0.36	0.189	23.53	14.65	1.94	3	3	0.125	0.189	1
SCN1A	938	7280	90	8128	20	70	1.2	0.42	1.81	0.00219	22.22	11.29	2.22	5	10	0.189	0.189	1
F7	1922	6984	18	8888	6	12	0.13	-0.1	0.33	0.17	33.33	21.56	1.82	2	1	0.189	0.189	1
TYK2	1675	7224	22	8878	6	15	0.15	-0.15	0.37	0.189	27.27	18.8	1.73	4	5	0.19	0.19	1
AKR1C3	1258	7428	21	8665	6	15	0.28	-0.05	0.56	0.0716	28.57	14.45	2.36	4	5	0.19	0.19	1
NR2F6	1420	7479	5	8894	2	3	0.08	-0.08	0.17	0.191	40	15.94	3.51	2	0	0.043	0.191	1
CD109	1628	7265	24	8869	7	17	0.23	-0.11	0.45	0.131	29.17	18.28	1.84	3	3	0.191	0.191	1
SCO2	1752	7010	26	8738	7	17	0.14	-0.14	0.43	0.173	26.92	19.97	1.65	3	3	0.191	0.191	1
SERAC1	1365	7535	27	8874	6	20	0.17	-0.17	0.43	0.191	22.22	15.31	1.66	3	0	0.00044	0.191	1
KLHDC8A	1258	7651	16	8894	4	11	0.19	-0.09	0.37	0.147	25	14.1	2.21	1	0	0.192	0.192	1
TRIM68	1587	7321	15	8893	5	10	0.15	-0.08	0.38	0.114	33.33	17.79	2.31	2	1	0.192	0.192	1
CDC42BPB	1150	7552	24	8678	5	19	0.2	-0.15	0.5	0.193	20.83	13.19	1.73	4	2	0.00297	0.193	1
TRDMT1	1323	7566	29	8860	7	22	0.27	-0.09	0.53	0.118	24.14	14.85	1.82	3	4	0.194	0.194	1
ATP1A4	1985	6924	144	8767	36	106	0.32	-0.36	0.91	0.195	25	22.23	1.18	15	26	0.0251	0.195	1
BEST4	1397	5554	20	6931	6	14	0.18	-0.18	0.45	0.195	30	20.07	1.7	4	2	0.0176	0.195	1
GNAO1	1081	7532	12	8601	4	8	0.32	0	0.42	0.0573	33.33	12.52	3.48	2	1	0.196	0.196	1
PRPF31	1722	7183	7	8899	4	2	0.22	0.07	0.29	0.0156	57.14	19.31	8.34	2	0	0.196	0.196	1
ANKRD42	956	7150	26	8080	5	21	0.24	-0.18	0.59	0.196	19.23	11.77	1.78	3	3	0.0552	0.196	1
C11orf42	1512	7396	5	8903	2	3	0.08	-0.08	0.16	0.196	40	16.96	3.26	2	0	0.043	0.196	1
COL6A1	1407	7451	57	8803	13	42	0.34	-0.13	0.76	0.0907	22.81	15.84	1.64	6	12	0.197	0.197	1
MFGE8	1192	6927	80	8040	15	64	0.39	-0.29	0.88	0.165	18.75	14.64	1.36	4	9	0.197	0.197	1
CUX1	1392	7291	16	8667	4	12	0.17	-0.13	0.34	0.197	25	16.01	1.75	2	1	0.105	0.197	1
AEBP1	1162	7743	43	8862	8	35	0.2	-0.25	0.59	0.198	18.6	13.02	1.52	4	7	0.0971	0.198	1
COL2A1	1390	7456	89	8759	17	70	0.26	-0.3	0.81	0.198	19.1	15.68	1.3	12	17	0.0002	0.198	1
ADAT1	992	5517	62	6447	12	50	0.36	-0.36	0.95	0.198	19.35	15.2	1.33	9	8	3.71e-05	0.198	1
NID2	1612	7296	31	8877	9	22	0.23	-0.08	0.53	0.102	29.03	18.06	1.85	4	5	0.199	0.199	1
MARVELD3	1453	7239	15	8677	4	11	0.17	-0.12	0.33	0.199	26.67	16.7	1.81	4	1	0.0011	0.199	1
PRUNE2	2295	6362	22	8635	8	14	0.12	-0.12	0.36	0.199	36.36	26.49	1.58	4	2	0.048	0.199	1
HINT3	974	7331	7	8298	2	5	0.12	-0.12	0.23	0.2	28.57	11.71	3.01	2	1	0.156	0.2	1
CUL7	1029	7851	50	8831	9	40	0.33	-0.27	0.77	0.2	18	11.55	1.72	5	9	0.0586	0.2	1
APTX	1319	5743	35	7027	9	26	0.28	-0.23	0.61	0.2	25.71	18.64	1.51	6	5	0.007	0.2	1
CERCAM	1085	7718	24	8779	7	17	0.42	0.05	0.74	0.0278	29.17	12.28	2.93	5	7	0.201	0.201	1
PTPRG	959	7950	23	8886	4	19	0.23	-0.18	0.47	0.201	17.39	10.75	1.75	3	4	0.0789	0.201	1
MMP21	1207	7326	9	8524	3	6	0.19	-0.1	0.29	0.132	33.33	14.12	3.03	2	1	0.203	0.203	1
AXIN1	1266	7284	10	8540	3	7	0.19	-0.09	0.28	0.204	30	14.79	2.47	2	1	0.162	0.204	1
C10orf2	1881	6737	56	8563	15	40	0.2	-0.24	0.58	0.204	26.79	21.79	1.34	7	4	0.000891	0.204	1
ZNF667	999	7907	7	8899	2	5	0.11	-0.11	0.23	0.204	28.57	11.2	3.17	2	0	0.0197	0.204	1
ADCY7	1149	7746	45	8851	8	36	0.2	-0.25	0.6	0.205	17.78	12.89	1.5	5	2	0.000141	0.205	1
ALDH1L1	1219	7643	56	8806	13	43	0.48	0	0.95	0.0382	23.21	13.7	1.9	4	7	0.205	0.205	1
GBA	1363	7522	54	8831	11	43	0.26	-0.26	0.65	0.206	20.37	15.31	1.41	3	5	0.182	0.206	1
GPRC5C	1165	7593	28	8730	6	22	0.2	-0.2	0.5	0.206	21.43	13.28	1.78	4	3	0.0127	0.206	1
ZNF677	1185	7537	12	8710	3	9	0.2	-0.1	0.29	0.207	25	13.57	2.12	2	1	0.11	0.207	1
KLK4	1242	7664	14	8892	4	10	0.19	-0.09	0.37	0.142	28.57	13.92	2.47	1	0	0.208	0.208	1
HNF1B	1179	7717	52	8845	9	42	0.29	-0.24	0.64	0.208	17.31	13.23	1.4	6	6	0.00144	0.208	1
SEMA3G	1642	7263	18	8887	5	13	0.15	-0.11	0.34	0.208	27.78	18.42	1.7	2	0	0.0174	0.208	1
CBL	1059	6466	20	7505	7	13	0.44	0.11	0.77	0.0169	35	14.02	3.29	2	1	0.208	0.208	1
FAT2	2645	6264	78	8833	26	50	0.22	-0.24	0.62	0.209	33.33	29.65	1.23	8	7	0.0358	0.209	1
MERTK	1186	6566	20	7732	6	14	0.3	-0.1	0.55	0.094	30	15.26	2.37	3	3	0.21	0.21	1
KDM4C	2215	6492	14	8694	5	8	0.12	-0.09	0.27	0.21	35.71	25.42	1.83	2	0	0.0399	0.21	1
AP4M1	1772	7130	38	8864	10	28	0.21	-0.18	0.49	0.211	26.32	19.88	1.44	4	4	0.0771	0.211	1
RNF213	2249	6613	41	8821	13	28	0.18	-0.18	0.48	0.211	31.71	25.35	1.37	6	2	0.00067	0.211	1
EPHA8	989	5544	15	6518	4	11	0.24	-0.18	0.48	0.211	26.67	15.11	2.04	4	1	0.0011	0.211	1
DUOXA2	1653	7255	16	8892	5	11	0.15	-0.11	0.33	0.212	31.25	18.53	1.99	2	1	0.167	0.212	1
VAV2	2157	6749	35	8871	11	24	0.18	-0.15	0.43	0.212	31.43	24.19	1.43	7	1	1.69e-06	0.212	1
PLEKHA6	1319	6918	10	8227	3	7	0.18	-0.09	0.27	0.212	30	16	2.25	2	0	0.0215	0.212	1
HFE	1904	7005	16	8893	5	11	0.13	-0.1	0.3	0.212	31.25	21.35	1.67	3	2	0.109	0.212	1
WFS1	1166	7333	122	8378	20	101	0.4	-0.45	1.04	0.212	16.39	13.68	1.25	15	14	4.51e-09	0.212	1
BTN2A1	1668	7166	23	8812	6	16	0.15	-0.15	0.37	0.212	26.09	18.86	1.61	3	2	0.0702	0.212	1
MFN1	1072	7837	84	8825	13	71	0.32	-0.37	0.85	0.213	15.48	12	1.34	8	16	0.0059	0.213	1
CASQ2	1261	7644	17	8888	4	13	0.18	-0.14	0.37	0.214	23.53	14.14	1.87	4	3	0.0156	0.214	1
TERT	1030	7811	28	8814	5	22	0.22	-0.22	0.55	0.214	17.86	11.63	1.72	2	1	0.0535	0.214	1
CAPSL	1137	7712	25	8824	5	20	0.2	-0.2	0.5	0.215	20	12.83	1.7	2	2	0.154	0.215	1
NDUFA8	1112	6501	18	7596	4	13	0.21	-0.16	0.42	0.216	22.22	14.59	1.8	4	3	0.0156	0.216	1
DSC3	1433	7459	55	8839	17	36	0.75	0.25	1.12	0.00254	30.91	16.02	2.46	6	8	0.216	0.216	1
CYP11B2	924	7975	7	8893	2	4	0.24	0	0.24	0.13	28.57	10.37	4.32	2	1	0.216	0.216	1
REEP4	1526	6063	13	7576	5	8	0.25	-0.04	0.41	0.0814	38.46	20.08	2.48	3	2	0.216	0.216	1
DPH2	1202	7707	18	8891	4	14	0.19	-0.14	0.38	0.217	22.22	13.47	1.83	3	1	0.00856	0.217	1
NEK10	1366	5925	5	7286	2	3	0.09	-0.09	0.18	0.217	40	18.72	2.89	2	0	0.043	0.217	1
CACNB1	1007	7690	28	8669	5	23	0.22	-0.22	0.56	0.217	17.86	11.56	1.66	3	4	0.0841	0.217	1
KRT72	1048	7356	53	8351	9	44	0.22	-0.27	0.71	0.217	16.98	12.44	1.44	4	9	0.141	0.217	1
OGDHL	1368	7508	88	8789	16	71	0.26	-0.3	0.78	0.217	18.18	15.38	1.24	6	15	0.14	0.217	1
ACOX2	1298	7611	29	8880	6	23	0.18	-0.18	0.45	0.219	20.69	14.55	1.53	5	4	0.00347	0.219	1
SMPD1	1051	6181	48	7185	9	38	0.22	-0.28	0.72	0.219	18.75	14.5	1.39	4	9	0.209	0.219	1
SHMT1	2600	5649	8	8241	4	4	0.11	-0.06	0.22	0.219	50	31.5	2.17	2	0	0.0815	0.219	1
ABCC5	1263	6173	66	7370	14	52	0.29	-0.33	0.81	0.219	21.21	16.95	1.32	10	8	1.54e-05	0.219	1
OPTN	921	7985	31	8875	5	26	0.24	-0.24	0.61	0.219	16.13	10.32	1.67	3	2	0.0128	0.219	1
TOR2A	1435	7390	11	8815	3	7	0.08	-0.08	0.25	0.221	27.27	16.25	2.21	2	0	0.0215	0.221	1
PDZRN3	1566	7257	15	8809	4	10	0.16	-0.12	0.31	0.221	26.67	17.73	1.85	2	1	0.14	0.221	1
GUCY2D	2495	5284	33	7746	13	20	0.18	-0.18	0.44	0.221	39.39	32.04	1.38	7	5	0.0484	0.221	1
CYP11B1	1295	6639	16	7919	4	11	0.18	-0.14	0.37	0.221	25	16.3	1.86	2	0	0.016	0.221	1
IDI2	1367	7541	6	8902	2	4	0.09	-0.09	0.17	0.221	33.33	15.33	2.76	2	1	0.216	0.221	1
FLT1	1101	7803	29	8876	6	22	0.31	-0.1	0.57	0.128	20.69	12.34	1.93	3	5	0.221	0.221	1
MICALL1	1459	7446	10	8895	3	7	0.08	-0.08	0.25	0.221	30	16.37	2.19	3	1	0.0227	0.221	1
PDE5A	1054	7707	28	8733	6	22	0.32	-0.11	0.59	0.118	21.43	12	1.99	3	5	0.221	0.221	1
BBS7	1322	7001	40	8285	8	30	0.18	-0.22	0.54	0.221	20	15.86	1.41	6	4	0.000528	0.221	1
NPC1L1	1248	7335	169	8417	28	138	0.38	-0.52	1.17	0.222	16.57	14.49	1.19	12	23	0.00163	0.222	1
DNAH9	4100	4808	66	8844	33	31	0.18	-0.2	0.52	0.222	50	45.99	1.25	15	3	9.2e-07	0.222	1
TUBE1	1458	5914	15	7358	5	9	0.17	-0.09	0.43	0.107	33.33	19.75	2.25	2	1	0.224	0.224	1
GNPTG	1101	7765	38	8828	9	29	0.52	0.05	0.83	0.0298	23.68	12.37	2.19	4	7	0.224	0.224	1
DCLRE1A	966	7466	14	8419	3	10	0.23	-0.12	0.35	0.176	21.43	11.44	2.32	2	2	0.224	0.224	1
MFSD3	994	7768	14	8748	5	9	0.34	0.06	0.57	0.0228	35.71	11.31	4.34	2	1	0.224	0.224	1
OTOS	919	6416	15	7321	3	11	0.12	-0.12	0.37	0.224	20	12.51	1.9	2	1	0.0789	0.224	1
TCOF1	1270	6854	24	8101	9	14	0.56	0.19	0.79	0.00481	37.5	15.57	3.47	3	2	0.225	0.225	1
CD14	1168	7726	19	8875	4	15	0.2	-0.15	0.39	0.225	21.05	13.12	1.76	2	2	0.176	0.225	1
NLRP14	1615	7290	37	8870	9	26	0.23	-0.15	0.53	0.164	24.32	18.11	1.56	3	4	0.225	0.225	1
EIF2AK1	1101	7545	14	8633	4	9	0.31	0	0.42	0.0678	28.57	12.71	3.05	1	0	0.226	0.226	1
INADL	2354	6555	29	8880	10	19	0.12	-0.14	0.38	0.226	34.48	26.4	1.47	4	2	0.039	0.226	1
WARS	1093	7745	7	8831	2	5	0.1	-0.1	0.21	0.227	28.57	12.35	2.83	2	0	0.0197	0.227	1
COASY	1778	7130	32	8876	10	22	0.28	-0.07	0.56	0.085	31.25	19.92	1.82	3	3	0.228	0.228	1
C14orf166	1410	7498	10	8898	3	7	0.17	-0.08	0.25	0.196	30	15.81	2.28	1	0	0.228	0.228	1
C19orf40	1401	7420	10	8811	3	7	0.17	-0.08	0.25	0.193	30	15.87	2.27	1	0	0.228	0.228	1
LIPI	1016	7884	32	8869	8	23	0.56	0.11	0.83	0.0182	25	11.37	2.7	3	4	0.229	0.229	1
NLRP4	1974	6932	23	8883	8	15	0.2	-0.1	0.39	0.134	34.78	22.13	1.87	4	4	0.229	0.229	1
LRP11	1288	7128	17	8400	4	12	0.18	-0.14	0.37	0.223	23.53	15.29	1.84	3	4	0.229	0.229	1
BAG1	930	7978	7	8901	2	5	0.12	-0.06	0.24	0.151	28.57	10.43	3.43	1	0	0.23	0.23	1
PUS3	1017	7676	7	8686	2	5	0.11	-0.11	0.22	0.183	28.57	11.69	3.02	1	0	0.23	0.23	1
LRP8	897	7124	68	7953	10	58	0.25	-0.38	0.88	0.23	14.71	11.15	1.37	8	10	9.92e-05	0.23	1
CDH1	928	6952	28	7852	5	23	0.24	-0.24	0.55	0.231	17.86	11.75	1.63	4	1	0.000207	0.231	1
DCHS2	2013	6896	91	8818	24	67	0.19	-0.29	0.71	0.231	26.37	22.56	1.23	12	13	0.00144	0.231	1
ASAH1	1634	7240	51	8824	18	32	0.68	0.26	1.05	0.00156	35.29	18.31	2.49	8	10	0.233	0.233	1
FAH	1355	7533	55	8835	10	43	0.17	-0.26	0.61	0.234	18.18	15.22	1.29	4	5	0.039	0.234	1
GMPR	926	6249	32	7143	6	26	0.25	-0.25	0.62	0.234	18.75	12.88	1.56	2	3	0.227	0.234	1
WDR48	1427	5025	13	6440	5	7	0.27	-0.04	0.45	0.0906	38.46	22.08	2.52	4	3	0.235	0.235	1
DUOX1	1384	7524	99	8812	18	78	0.26	-0.38	0.81	0.236	18.18	15.5	1.25	7	13	0.0318	0.236	1
RSPH1	1262	7408	23	8647	5	18	0.19	-0.19	0.42	0.237	21.74	14.54	1.63	3	4	0.149	0.237	1
ABRA	968	7680	36	8612	11	25	0.81	0.35	1.16	0.00149	30.56	11.11	3.49	4	5	0.237	0.237	1
ZNF132	1690	7199	11	8878	4	7	0.15	-0.07	0.29	0.157	36.36	18.99	2.43	2	1	0.237	0.237	1
NFX1	1182	7508	7	8683	2	5	0.1	-0.1	0.2	0.238	28.57	13.59	2.54	2	1	0.156	0.238	1
KRT76	908	7998	68	8838	9	59	0.25	-0.37	0.8	0.238	13.24	10.17	1.34	4	11	0.107	0.238	1
MUC4	2114	6792	30	8876	9	21	0.12	-0.16	0.37	0.24	30	23.72	1.38	4	4	0.129	0.24	1
IHH	1042	7438	17	8464	5	11	0.33	0.05	0.55	0.0286	29.41	12.25	3.24	3	3	0.24	0.24	1
GFAP	1627	6474	31	8071	8	22	0.15	-0.19	0.46	0.241	25.81	20.06	1.45	4	5	0.146	0.241	1
ABCG8	1635	7273	39	8870	9	29	0.15	-0.22	0.49	0.241	23.08	18.33	1.38	5	7	0.0781	0.241	1
PCDHB10	1896	7013	16	8893	5	11	0.13	-0.13	0.3	0.241	31.25	21.26	1.68	3	1	0.0291	0.241	1
PPOX	1554	6404	20	7938	8	12	0.32	0	0.56	0.0325	40	19.48	2.75	3	2	0.242	0.242	1
EXO1	1383	7524	11	8896	3	8	0.09	-0.09	0.26	0.242	27.27	15.51	2.04	3	1	0.0162	0.242	1
ATG7	933	5654	7	6580	2	5	0.12	-0.12	0.25	0.243	28.57	14.15	2.42	2	1	0.156	0.243	1
GLB1L2	1759	6909	71	8598	17	53	0.21	-0.29	0.64	0.243	23.94	20.26	1.26	10	9	0.000311	0.243	1
GALT	1215	7628	51	8792	9	42	0.19	-0.29	0.62	0.244	17.65	13.72	1.35	5	5	0.00493	0.244	1
IFFO1	1832	6701	15	8518	5	10	0.14	-0.1	0.31	0.196	33.33	21.45	1.83	1	0	0.244	0.244	1
SGCG	1445	7401	36	8810	8	28	0.17	-0.21	0.5	0.244	22.22	16.31	1.46	7	6	0.000662	0.244	1
FUCA2	1728	6416	15	8129	6	9	0.22	-0.04	0.4	0.0719	40	21.18	2.48	3	2	0.244	0.244	1
CYP2D6	1247	7619	18	8848	4	14	0.19	-0.19	0.37	0.245	22.22	14.05	1.75	2	1	0.0815	0.245	1
NPC1	1527	6661	121	8067	26	95	0.24	-0.44	0.93	0.245	21.49	18.61	1.19	14	16	4.11e-05	0.245	1
KIF21B	1351	7106	27	8430	7	20	0.26	-0.13	0.53	0.134	25.93	15.94	1.84	2	2	0.245	0.245	1
KRT2	1530	7378	62	8846	13	49	0.24	-0.28	0.63	0.245	20.97	17.15	1.28	7	7	0.00221	0.245	1
FAM20A	1385	6718	22	8081	7	15	0.26	-0.04	0.52	0.0738	31.82	17.05	2.26	3	3	0.246	0.246	1
NR1I3	1408	6889	46	8251	10	36	0.17	-0.26	0.6	0.246	21.74	16.94	1.36	7	5	0.000304	0.246	1
SLC5A12	1294	7614	29	8879	6	23	0.18	-0.18	0.45	0.246	20.69	14.51	1.53	4	4	0.0267	0.246	1
CLDN20	2066	6843	22	8887	7	15	0.13	-0.13	0.35	0.235	31.82	23.17	1.55	3	3	0.246	0.246	1
TJP2	1582	7327	10	8899	3	7	0.08	-0.08	0.23	0.247	30	17.74	1.98	3	1	0.0227	0.247	1
KLK10	1232	7617	16	8833	4	12	0.19	-0.09	0.38	0.17	25	13.9	2.06	2	2	0.247	0.247	1
G6PC3	933	7649	16	8566	4	12	0.24	-0.06	0.48	0.0922	25	10.85	2.73	2	2	0.247	0.247	1
CARD14	1731	7141	13	8859	4	9	0.14	-0.11	0.29	0.247	30.77	19.49	1.83	3	1	0.0266	0.247	1
DHTKD1	1212	7696	62	8846	11	51	0.19	-0.33	0.67	0.248	17.74	13.58	1.37	8	3	1.63e-07	0.248	1
SPAG16	1099	7126	13	8212	3	10	0.11	-0.16	0.32	0.249	23.08	13.35	1.95	2	1	0.0923	0.249	1
CEP63	1122	7787	21	8888	4	17	0.2	-0.2	0.41	0.249	19.05	12.58	1.63	2	1	0.0586	0.249	1
SLAMF8	1358	7543	17	8884	4	13	0.17	-0.17	0.35	0.249	23.53	15.24	1.71	3	1	0.0104	0.249	1
OBP2B	908	7785	17	8676	3	14	0.12	-0.18	0.37	0.249	17.65	10.43	1.84	2	0	0.00637	0.249	1
DOK4	1343	7208	31	8520	7	24	0.18	-0.18	0.53	0.204	22.58	15.68	1.57	3	5	0.249	0.249	1
ABCC10	917	7864	101	8680	13	88	0.37	-0.49	0.97	0.251	12.87	10.41	1.27	9	17	0.000334	0.251	1
NEIL3	1795	7114	10	8900	3	6	0.07	-0.07	0.21	0.251	30	20.13	1.98	2	1	0.203	0.251	1
NRP1	1221	7688	58	8852	10	47	0.19	-0.33	0.66	0.253	17.24	13.68	1.34	8	13	0.00274	0.253	1
MYH6	1960	6880	152	8691	37	112	0.26	-0.43	0.88	0.253	24.34	22.13	1.16	14	21	0.00774	0.253	1
ERCC6	1158	7664	99	8724	15	83	0.3	-0.4	0.84	0.254	15.15	13.1	1.2	9	17	0.002	0.254	1
CYP4F3	1133	6781	66	7850	15	49	0.62	0	1.13	0.0335	22.73	14.24	1.83	3	5	0.255	0.255	1
SETD2	1300	6364	41	7624	9	31	0.19	-0.28	0.56	0.255	21.95	16.93	1.42	5	9	0.145	0.255	1
SCRN2	1762	7144	9	8897	3	6	0.07	-0.07	0.21	0.256	33.33	19.77	2.03	2	1	0.203	0.256	1
TMTC4	1972	6908	28	8854	8	18	0.13	-0.13	0.39	0.213	28.57	22.18	1.56	5	7	0.256	0.256	1
CHMP2A	941	6627	9	7559	3	6	0.24	-0.06	0.36	0.109	33.33	12.41	3.52	1	0	0.257	0.257	1
DUSP27	1624	7114	9	8729	3	6	0.08	-0.08	0.23	0.23	33.33	18.57	2.19	1	0	0.257	0.257	1
CASP4	1182	7727	9	8900	3	6	0.2	-0.1	0.29	0.143	33.33	13.25	3.27	1	0	0.257	0.257	1
SFTPD	1234	6833	28	8039	6	22	0.19	-0.24	0.48	0.258	21.43	15.28	1.51	4	2	0.00372	0.258	1
UNC5C	1345	7552	12	8885	3	9	0.09	-0.13	0.26	0.259	25	15.1	1.87	2	0	0.014	0.259	1
CELA3A	967	7886	33	8821	5	27	0.23	-0.23	0.52	0.259	15.15	10.91	1.51	4	5	0.0159	0.259	1
WDR62	1444	7383	11	8816	3	8	0.08	-0.12	0.25	0.26	27.27	16.35	1.92	2	1	0.132	0.26	1
EXT1	905	6611	42	7474	7	35	0.25	-0.31	0.69	0.26	16.67	12.01	1.46	5	4	0.00123	0.26	1
CPA1	1388	7511	16	8883	7	9	0.43	0.13	0.6	0.0061	43.75	15.55	4.21	5	4	0.26	0.26	1
TNS1	2211	6693	140	8767	38	99	0.24	-0.39	0.81	0.262	27.14	24.79	1.16	17	10	1.19e-07	0.262	1
KRT19	2308	6600	20	8888	7	13	0.12	-0.15	0.29	0.262	35	25.89	1.54	3	2	0.158	0.262	1
FPR2	1255	7637	8	8884	3	5	0.19	0	0.28	0.0876	37.5	14.09	3.65	2	1	0.262	0.262	1
C14orf159	1405	7481	8	8878	3	5	0.17	-0.04	0.25	0.126	37.5	15.79	3.19	2	1	0.262	0.262	1
DUOXA1	1657	7251	8	8900	3	5	0.15	-0.07	0.22	0.161	37.5	18.58	2.63	2	1	0.262	0.262	1
HDAC5	1167	7727	8	8886	3	5	0.2	0	0.3	0.0644	37.5	13.1	3.97	2	1	0.262	0.262	1
ZFP2	1394	6963	8	8349	3	5	0.17	-0.09	0.26	0.134	37.5	16.66	3	2	1	0.262	0.262	1
COL6A2	1630	7064	93	8602	20	72	0.23	-0.34	0.76	0.263	21.51	18.72	1.2	9	13	0.00862	0.263	1
ZNF502	1019	6167	13	7173	5	8	0.34	0.06	0.57	0.027	38.46	14.14	3.78	2	1	0.263	0.263	1
MTO1	883	8026	32	8877	5	27	0.25	-0.25	0.57	0.263	15.62	9.89	1.68	4	5	0.0159	0.263	1
ZNF77	1280	7600	19	8861	4	15	0.09	-0.18	0.37	0.264	21.05	14.4	1.58	3	2	0.0298	0.264	1
EPHA5	998	7771	17	8753	3	13	0.11	-0.17	0.34	0.265	17.65	11.37	1.8	2	2	0.149	0.265	1
PLA2R1	1200	7595	20	8775	4	16	0.1	-0.19	0.39	0.265	20	13.63	1.58	3	2	0.0252	0.265	1
GALE	1160	7703	39	8824	7	32	0.2	-0.25	0.55	0.255	17.95	13.07	1.45	3	7	0.266	0.266	1
RBL2	1399	5496	81	6815	19	61	0.27	-0.4	0.85	0.266	23.46	20.25	1.22	10	9	0.000297	0.266	1
DGKG	1400	7508	34	8875	7	26	0.17	-0.21	0.47	0.266	20.59	15.7	1.44	5	4	0.00461	0.266	1
CCDC38	1116	7502	22	8596	5	17	0.21	-0.1	0.51	0.121	22.73	12.92	1.98	3	5	0.266	0.266	1
ANGPTL6	1083	6519	32	7570	6	26	0.22	-0.27	0.54	0.267	18.75	14.23	1.39	5	4	0.002	0.267	1
TTLL1	1114	6077	8	7184	2	5	0.11	-0.11	0.21	0.268	25	15.48	2.18	2	1	0.156	0.268	1
AARS	915	7749	49	8615	8	41	0.37	-0.18	0.86	0.129	16.33	10.53	1.65	3	8	0.268	0.268	1
FBXO18	1848	7052	6	8895	2	3	0.07	-0.07	0.14	0.27	33.33	20.75	2.54	2	0	0.043	0.27	1
KRT82	1821	7060	71	8810	17	54	0.21	-0.31	0.62	0.27	23.94	20.48	1.22	6	10	0.112	0.27	1
D2HGDH	1270	6540	26	7784	6	20	0.19	-0.24	0.47	0.27	23.08	16.24	1.54	4	4	0.0422	0.27	1
MDP1	1048	7847	6	8889	2	4	0.11	-0.05	0.22	0.158	33.33	11.77	3.74	1	0	0.271	0.271	1
LILRB5	1300	7605	6	8899	2	4	0.09	-0.09	0.18	0.189	33.33	14.59	2.92	1	0	0.271	0.271	1
TRIM9	1048	7817	6	8859	2	4	0.11	-0.05	0.22	0.164	33.33	11.81	3.73	1	0	0.271	0.271	1
ZNF619	1243	7456	6	8693	2	4	0.09	-0.09	0.19	0.258	33.33	14.28	3	1	0	0.271	0.271	1
ERMAP	1073	7747	6	8814	2	4	0.11	-0.05	0.21	0.162	33.33	12.15	3.61	1	0	0.271	0.271	1
NRIP2	871	8022	6	8887	2	4	0.25	0	0.25	0.127	33.33	9.78	4.61	1	0	0.271	0.271	1
RNASE6	1262	7499	8	8755	2	4	0.09	-0.09	0.19	0.207	25	14.39	2.97	1	0	0.271	0.271	1
SEMA4A	956	7391	9	8338	2	7	0.12	-0.12	0.24	0.271	22.22	11.44	2.21	1	0	0.176	0.271	1
SIGLEC11	1298	7595	6	8887	2	4	0.09	-0.09	0.18	0.201	33.33	14.58	2.93	1	0	0.271	0.271	1
FAM129C	1053	7844	6	8891	2	4	0.11	-0.05	0.22	0.151	33.33	11.82	3.72	1	0	0.271	0.271	1
PRMT7	1494	6972	19	8447	5	14	0.16	-0.16	0.33	0.271	26.32	17.63	1.67	4	4	0.0705	0.271	1
PIWIL4	1358	6909	6	8261	2	4	0.09	-0.09	0.18	0.271	33.33	16.41	2.54	1	0	0.271	0.271	1
RPAP1	2194	6714	22	8887	9	12	0.24	0	0.45	0.047	40.91	24.59	2.3	4	3	0.271	0.271	1
CASP14	1522	7385	6	8901	2	4	0.08	-0.08	0.16	0.264	33.33	17.08	2.43	1	0	0.271	0.271	1
EP300	1672	7216	96	8793	21	74	0.22	-0.37	0.74	0.271	21.88	18.78	1.22	12	13	0.000123	0.271	1
TGM4	1974	5774	29	7719	9	20	0.14	-0.2	0.41	0.273	31.03	25.46	1.32	5	3	0.0155	0.273	1
TEX14	1542	7365	67	8840	14	53	0.16	-0.31	0.63	0.273	20.9	17.29	1.26	8	6	0.000129	0.273	1
PEX6	1581	6492	49	8024	12	37	0.16	-0.28	0.55	0.273	24.49	19.55	1.33	6	3	0.000591	0.273	1
NDUFAF3	1062	7511	8	8565	2	6	0.11	-0.11	0.21	0.275	25	12.38	2.36	2	0	0.0146	0.275	1
MMP27	1993	6916	8	8901	3	5	0.06	-0.06	0.19	0.275	37.5	22.36	2.08	2	1	0.262	0.275	1
UGGT2	1979	6921	24	8876	7	17	0.13	-0.16	0.32	0.275	29.17	22.22	1.44	4	2	0.0163	0.275	1
EFCAB7	1027	6281	13	7295	3	10	0.11	-0.17	0.34	0.275	23.08	14.04	1.83	1	0	0.17	0.275	1
EFNA4	1306	7595	16	8886	4	11	0.18	-0.09	0.36	0.136	25	14.65	2.11	3	4	0.275	0.275	1
USH1C	1988	6921	12	8897	4	8	0.06	-0.13	0.26	0.276	33.33	22.3	1.74	2	1	0.196	0.276	1
SMARCA2	2205	6567	21	8751	7	14	0.12	-0.15	0.3	0.277	33.33	25.12	1.49	4	2	0.0307	0.277	1
KLK11	1319	7583	31	8871	6	25	0.18	-0.22	0.45	0.277	19.35	14.8	1.38	5	7	0.0243	0.277	1
CACNB2	960	6130	80	7010	13	67	0.24	-0.48	0.96	0.278	16.25	13.51	1.24	6	9	0.00814	0.278	1
GP2	1010	7637	74	8573	14	60	0.56	-0.06	1.12	0.0506	18.92	11.62	1.76	3	7	0.278	0.278	1
FOXRED1	1777	6912	35	8654	9	26	0.14	-0.21	0.42	0.279	25.71	20.43	1.35	5	3	0.00523	0.279	1
RBM26	1440	7466	34	8873	7	26	0.17	-0.25	0.46	0.279	20.59	16.15	1.4	5	5	0.0113	0.279	1
RARS	1705	7153	18	8840	5	13	0.15	-0.15	0.29	0.28	27.78	19.23	1.61	3	0	0.00084	0.28	1
CLDN7	3556	5295	17	8835	8	8	0.09	-0.09	0.24	0.281	47.06	40.16	1.49	3	1	0.178	0.281	1
COL9A3	1345	7137	70	8413	13	56	0.18	-0.35	0.71	0.281	18.57	15.83	1.23	7	7	0.001	0.281	1
UNC93A	2037	6852	12	8877	4	8	0.06	-0.13	0.25	0.281	33.33	22.9	1.68	2	1	0.196	0.281	1
GYS2	947	7578	37	8488	8	29	0.48	0	0.83	0.0502	21.62	11.06	2.21	2	3	0.283	0.283	1
C11orf40	1618	7291	10	8899	3	7	0.08	-0.11	0.23	0.284	30	18.15	1.93	3	1	0.0227	0.284	1
ZNF701	1396	7430	18	8809	4	13	0.09	-0.17	0.34	0.285	22.22	15.8	1.64	2	2	0.22	0.285	1
COL14A1	1969	6842	84	8728	21	62	0.2	-0.33	0.62	0.285	25	22.32	1.18	12	12	0.000323	0.285	1
ACTL8	929	6165	14	7080	3	11	0.12	-0.25	0.37	0.285	21.43	13.08	1.81	3	2	0.0305	0.285	1
STAB1	2564	6345	148	8764	45	100	0.22	-0.41	0.74	0.286	30.41	28.74	1.11	12	16	0.0621	0.286	1
SURF1	1601	7299	34	8866	8	26	0.15	-0.23	0.46	0.286	23.53	17.97	1.4	6	5	0.00338	0.286	1
MYLK	1222	7686	26	8882	5	21	0.19	-0.24	0.43	0.287	19.23	13.7	1.5	2	3	0.245	0.287	1
MCEE	918	7854	26	8746	4	22	0.12	-0.24	0.49	0.287	15.38	10.45	1.56	2	4	0.254	0.287	1
NEBL	1386	7521	29	8878	6	23	0.17	-0.21	0.43	0.289	20.69	15.54	1.42	4	0	6.27e-06	0.289	1
IMPDH2	1055	7518	15	8558	3	12	0.11	-0.22	0.32	0.289	20	12.29	1.78	2	2	0.169	0.289	1
EZR	1993	6906	42	8859	11	29	0.13	-0.23	0.45	0.289	26.19	22.37	1.31	6	3	0.00124	0.289	1
ABCF2	1283	7626	35	8874	8	27	0.27	-0.09	0.64	0.107	22.86	14.37	1.76	5	11	0.289	0.289	1
DHRS1	1791	7117	25	8883	7	18	0.14	-0.14	0.38	0.227	28	20.08	1.55	3	4	0.289	0.289	1
SERPINA10	1887	6994	31	8851	8	22	0.13	-0.2	0.4	0.29	25.81	21.23	1.35	4	5	0.146	0.29	1
ZFYVE26	1525	7380	17	8889	4	12	0.08	-0.16	0.32	0.29	23.53	17.11	1.61	3	2	0.0522	0.29	1
TRPV3	3187	5721	52	8856	21	31	0.1	-0.22	0.44	0.29	40.38	35.75	1.22	10	4	0.000384	0.29	1
PCDHGA2	1473	6553	20	8006	5	15	0.08	-0.17	0.33	0.29	25	18.34	1.48	3	4	0.222	0.29	1
DAAM1	1447	7458	37	8868	9	28	0.25	-0.12	0.58	0.138	24.32	16.22	1.66	3	5	0.291	0.291	1
ZNF227	903	7181	25	8059	4	21	0.12	-0.25	0.5	0.291	16	11.16	1.51	2	2	0.102	0.291	1
PCDHGA3	1772	6475	30	8218	8	21	0.14	-0.22	0.43	0.291	26.67	21.47	1.39	3	4	0.274	0.291	1
LAMA3	1541	7366	76	8832	15	60	0.16	-0.35	0.63	0.291	19.74	17.28	1.2	6	13	0.122	0.291	1
STRN3	930	7783	42	8671	6	36	0.24	-0.36	0.6	0.291	14.29	10.66	1.39	3	6	0.109	0.291	1
UTP11L	1060	7843	10	8893	4	6	0.32	0.05	0.43	0.0268	40	11.87	4.93	2	1	0.292	0.292	1
KIAA0141	1627	7280	10	8897	4	6	0.15	-0.04	0.3	0.111	40	18.24	2.98	2	1	0.292	0.292	1
DHRSX	1686	7149	18	8817	5	13	0.15	-0.15	0.33	0.262	27.78	19.07	1.63	2	2	0.292	0.292	1
NDE1	921	7899	8	8812	2	6	0.12	-0.12	0.24	0.195	25	10.43	2.86	2	2	0.292	0.292	1
C1orf87	944	7925	8	8861	2	6	0.12	-0.12	0.24	0.213	25	10.63	2.8	2	2	0.292	0.292	1
MAN1A1	1615	7292	11	8897	4	6	0.15	-0.04	0.3	0.0938	36.36	18.11	3.01	2	1	0.292	0.292	1
ITGA2	1769	7089	29	8830	7	21	0.14	-0.21	0.35	0.293	24.14	19.95	1.34	4	4	0.0605	0.293	1
ZCCHC6	1225	7380	7	8598	2	5	0.1	-0.1	0.19	0.293	28.57	14.22	2.41	1	0	0.23	0.293	1
TIGD6	948	7960	8	8900	3	5	0.24	0	0.35	0.0382	37.5	10.62	5.04	1	0	0.294	0.294	1
DNAJB2	932	4743	8	5667	3	5	0.26	-0.06	0.39	0.126	37.5	16.39	3.05	1	0	0.294	0.294	1
PBK	1760	7138	8	8890	3	5	0.14	-0.07	0.21	0.203	37.5	19.76	2.43	1	0	0.294	0.294	1
SCARA5	1727	7178	14	8891	4	10	0.07	-0.14	0.29	0.295	28.57	19.38	1.66	2	1	0.14	0.295	1
GRID2	998	7815	29	8784	5	24	0.23	-0.23	0.51	0.234	17.24	11.3	1.63	2	4	0.296	0.296	1
KRT38	1570	7337	33	8875	7	25	0.15	-0.23	0.39	0.296	21.21	17.61	1.31	3	4	0.147	0.296	1
ATP11B	928	7946	25	8849	6	19	0.48	0	0.72	0.0377	24	10.42	2.7	3	5	0.297	0.297	1
VPS13A	1622	6115	31	7706	8	23	0.16	-0.23	0.47	0.298	25.81	20.94	1.31	6	3	0.000542	0.298	1
ADAMTSL3	1661	7211	70	8803	15	54	0.15	-0.33	0.59	0.298	21.43	18.7	1.21	7	6	0.00139	0.298	1
GNPAT	1026	6276	33	7269	7	26	0.23	-0.23	0.68	0.171	21.21	14.02	1.65	3	6	0.299	0.299	1
OR1B1	1634	7203	6	8831	2	4	0.08	-0.08	0.15	0.3	33.33	18.48	2.2	1	0	0.271	0.3	1
TDRD10	1122	7786	15	8893	3	12	0.1	-0.2	0.31	0.3	20	12.58	1.73	2	1	0.0681	0.3	1
SLC7A7	1908	7000	48	8860	12	36	0.13	-0.27	0.47	0.3	25	21.4	1.22	5	5	0.033	0.3	1
KIF17	2109	6791	42	8858	12	30	0.12	-0.25	0.43	0.3	28.57	23.67	1.29	5	6	0.117	0.3	1
HARS2	1231	7665	28	8869	5	22	0.09	-0.24	0.38	0.3	17.86	13.82	1.42	2	2	0.132	0.3	1
IFT140	1101	5567	39	6629	8	31	0.22	-0.33	0.65	0.301	20.51	16.49	1.3	3	6	0.27	0.301	1
ADAM15	1587	7320	7	8901	2	4	0.08	-0.08	0.15	0.301	28.57	17.81	2.31	1	0	0.271	0.301	1
MSH6	1083	7826	112	8799	18	92	0.53	-0.21	1.16	0.0996	16.07	12.1	1.41	6	22	0.302	0.302	1
CPZ	1057	7837	33	8862	5	27	0.11	-0.27	0.48	0.302	15.15	11.87	1.37	2	4	0.249	0.302	1
IFIT1	902	7990	44	8848	6	38	0.25	-0.37	0.62	0.302	13.64	10.13	1.4	5	8	0.00693	0.302	1
CEP350	1033	7637	16	8654	3	13	0.11	-0.22	0.33	0.302	18.75	11.9	1.71	2	3	0.262	0.302	1
ADCY8	1006	7425	31	8400	5	26	0.11	-0.28	0.51	0.302	16.13	11.92	1.42	4	2	0.000946	0.302	1
MASP2	1319	7431	43	8708	8	34	0.18	-0.27	0.54	0.303	18.6	15.06	1.33	8	4	5.95e-07	0.303	1
MYO1E	1489	7419	53	8858	10	40	0.16	-0.28	0.52	0.303	18.87	16.7	1.25	6	8	0.0139	0.303	1
FAM120B	1041	7648	9	8680	2	7	0.11	-0.11	0.22	0.303	22.22	11.97	2.1	2	1	0.0923	0.303	1
INPP5K	2711	6196	34	8874	12	21	0.11	-0.19	0.37	0.303	35.29	30.41	1.31	9	7	0.0104	0.303	1
LTF	2221	6673	14	8880	6	8	0.18	-0.03	0.33	0.085	42.86	24.94	2.25	3	2	0.303	0.303	1
IGF1R	1427	7481	28	8880	6	22	0.17	-0.21	0.42	0.303	21.43	16	1.43	4	5	0.061	0.303	1
RAPSN	1015	7827	23	8819	4	19	0.11	-0.22	0.45	0.304	17.39	11.46	1.62	2	3	0.212	0.304	1
NR1D1	943	7948	52	8840	7	44	0.24	-0.36	0.65	0.305	13.46	10.59	1.34	3	9	0.228	0.305	1
SCEL	1681	7227	25	8883	6	19	0.15	-0.18	0.37	0.305	24	18.86	1.36	4	2	0.00624	0.305	1
ATP6V0A2	1574	7331	72	8836	14	55	0.15	-0.35	0.62	0.291	19.44	17.66	1.19	4	10	0.305	0.305	1
CTNND2	921	7970	19	8872	3	16	0.12	-0.24	0.36	0.305	15.79	10.35	1.62	2	2	0.106	0.305	1
PIK3R1	1069	7036	15	8090	3	12	0.11	-0.22	0.32	0.305	20	13.18	1.65	2	3	0.295	0.305	1
MTBP	1026	7521	10	8537	2	8	0.11	-0.11	0.22	0.306	20	11.99	1.83	2	2	0.189	0.306	1
ACO1	1473	7198	17	8654	4	13	0.08	-0.16	0.33	0.306	23.53	16.97	1.5	3	1	0.0104	0.306	1
SLC26A9	889	4690	113	5466	20	93	0.27	-0.74	1.27	0.306	17.7	15.9	1.13	14	23	6.81e-05	0.306	1
GATA2	954	7871	26	8799	4	22	0.12	-0.24	0.47	0.307	15.38	10.8	1.5	2	4	0.254	0.307	1
EEA1	1062	7821	9	8874	2	7	0.11	-0.11	0.21	0.308	22.22	11.95	2.1	2	1	0.0923	0.308	1
PNPLA6	2082	6804	20	8866	6	14	0.06	-0.16	0.31	0.308	30	23.42	1.4	2	1	0.15	0.308	1
SMYD4	3546	5362	24	8884	11	13	0.09	-0.14	0.28	0.308	45.83	39.79	1.28	4	1	0.0322	0.308	1
ACE	1880	6985	14	8851	4	10	0.07	-0.14	0.27	0.309	28.57	21.2	1.49	2	1	0.14	0.309	1
KL	1310	7591	13	8888	3	10	0.09	-0.18	0.27	0.309	23.08	14.71	1.74	3	1	0.00911	0.309	1
ZYX	1587	7320	31	8876	7	24	0.15	-0.23	0.38	0.31	22.58	17.8	1.35	3	3	0.0891	0.31	1
TEK	2618	6291	23	8886	10	13	0.16	-0.05	0.38	0.105	43.48	29.35	1.85	3	2	0.312	0.312	1
TBC1D2	1309	6437	5	7741	3	2	0.18	0	0.28	0.0335	60	16.87	7.38	3	1	0.312	0.312	1
SLC12A3	1624	7276	109	8792	22	86	0.15	-0.41	0.75	0.312	20.18	18.22	1.15	11	13	0.000273	0.312	1
THBS2	2277	6600	40	8837	12	28	0.12	-0.24	0.41	0.312	30	25.63	1.24	7	6	0.0134	0.312	1
TLN1	2410	6499	14	8895	5	9	0.06	-0.11	0.23	0.313	35.71	27.04	1.5	4	1	0.00589	0.313	1
SLC25A2	1420	7483	13	8891	5	7	0.25	0.04	0.42	0.0298	38.46	15.91	3.76	2	1	0.314	0.314	1
NLRP1	2186	4881	12	7055	5	7	0.07	-0.13	0.26	0.314	41.67	30.91	1.59	4	1	0.0134	0.314	1
SHROOM1	916	7787	5	8698	2	3	0.24	0	0.24	0.0861	40	10.51	5.67	2	1	0.316	0.316	1
GJB4	1109	7100	68	8141	11	57	0.21	-0.42	0.73	0.316	16.18	13.49	1.24	6	13	0.0395	0.316	1
ACTL7A	1882	7023	66	8839	16	50	0.13	-0.3	0.54	0.318	24.24	21.11	1.19	10	14	0.00847	0.318	1
LPCAT4	931	6385	14	7302	4	10	0.25	0	0.49	0.0785	28.57	12.7	2.74	2	2	0.319	0.319	1
UBA7	1353	5601	40	6915	9	30	0.18	-0.32	0.55	0.319	22.5	19.44	1.24	4	7	0.206	0.319	1
PAPL	969	7639	33	8575	5	28	0.12	-0.29	0.47	0.319	15.15	11.24	1.41	2	5	0.319	0.319	1
PKHD1	2128	6781	187	8725	47	137	0.19	-0.52	0.9	0.319	25.13	23.85	1.09	14	17	0.00195	0.319	1
OR51L1	1721	7177	6	8892	2	4	0.07	-0.07	0.14	0.319	33.33	19.33	2.09	2	0	0.028	0.319	1
PZP	1627	7281	42	8867	9	32	0.15	-0.26	0.45	0.32	21.43	18.25	1.26	5	6	0.0308	0.32	1
SERPINB7	991	6629	35	7585	7	28	0.35	-0.23	0.7	0.159	20	12.97	1.67	4	10	0.32	0.32	1
KRT27	1530	7378	32	8876	7	25	0.16	-0.24	0.43	0.276	21.88	17.16	1.35	3	6	0.321	0.321	1
SDAD1	972	7734	25	8681	4	21	0.12	-0.23	0.46	0.322	16	11.15	1.52	2	2	0.102	0.322	1
CR2	1158	7678	36	8800	6	30	0.1	-0.3	0.5	0.322	16.67	13.09	1.33	5	7	0.0111	0.322	1
OCA2	1357	7545	79	8826	14	62	0.17	-0.39	0.7	0.324	17.72	15.22	1.26	4	10	0.232	0.324	1
TGFBR2	941	6051	15	6977	3	12	0.12	-0.25	0.37	0.326	20	13.44	1.61	2	2	0.169	0.326	1
NOC3L	1181	5262	11	6432	3	8	0.1	-0.21	0.31	0.326	27.27	18.31	1.67	2	1	0.132	0.326	1
CIITA	939	7965	20	8884	3	17	0.12	-0.24	0.36	0.326	15	10.54	1.5	2	3	0.172	0.326	1
PRSS21	1137	7770	16	8891	3	13	0.1	-0.2	0.3	0.327	18.75	12.75	1.58	2	3	0.262	0.327	1
FRS3	1155	7700	10	8846	2	7	0.1	-0.15	0.2	0.327	20	13.03	1.9	2	0	0.0112	0.327	1
LRP10	1207	7672	29	8851	5	23	0.1	-0.24	0.38	0.327	17.24	13.58	1.38	4	6	0.0497	0.327	1
CDCA2	1858	7042	10	8890	3	7	0.07	-0.14	0.2	0.328	30	20.87	1.62	2	1	0.162	0.328	1
ANKRD35	1350	7558	42	8866	10	32	0.35	-0.13	0.7	0.101	23.81	15.11	1.75	2	3	0.328	0.328	1
PTPN21	1263	6321	52	7533	10	41	0.19	-0.38	0.62	0.328	19.23	16.63	1.22	7	11	0.0129	0.328	1
HEATR2	929	7647	24	8552	6	18	0.48	0	0.72	0.0401	25	10.79	2.74	3	5	0.329	0.329	1
PTPRH	2022	6884	53	8853	14	39	0.13	-0.29	0.48	0.329	26.42	22.68	1.22	6	7	0.0463	0.329	1
MVK	935	6320	36	7219	6	30	0.12	-0.37	0.61	0.329	16.67	12.87	1.35	2	4	0.27	0.329	1
DSG1	1237	6529	24	7742	5	19	0.1	-0.24	0.38	0.33	20.83	15.91	1.39	5	1	1.33e-05	0.33	1
TAS2R19	1426	7457	5	8878	2	3	0.08	-0.08	0.17	0.183	40	16.04	3.49	1	0	0.33	0.33	1
MTFP1	2018	6739	5	8752	2	3	0.06	-0.06	0.13	0.317	40	23.03	2.23	1	0	0.33	0.33	1
DUSP12	1586	7257	5	8838	2	3	0.08	-0.08	0.15	0.206	40	17.92	3.05	1	0	0.33	0.33	1
NEDD9	1232	7591	5	8818	2	3	0.09	-0.05	0.19	0.149	40	13.95	4.11	1	0	0.33	0.33	1
CCDC42	1195	6524	5	7714	2	3	0.1	-0.05	0.2	0.16	40	15.47	3.64	1	0	0.33	0.33	1
FCRLA	1306	7541	5	8842	2	3	0.09	-0.04	0.18	0.157	40	14.75	3.85	1	0	0.33	0.33	1
2017-09-04	1871	6760	5	8626	2	3	0.07	-0.07	0.14	0.284	40	21.67	2.41	1	0	0.33	0.33	1
FSD1	2018	6855	5	8868	2	3	0.06	-0.06	0.13	0.311	40	22.73	2.26	1	0	0.33	0.33	1
ITGB1	1079	7828	41	8869	6	32	0.11	-0.32	0.53	0.33	14.63	12.1	1.36	4	7	0.0515	0.33	1
BTN1A1	1553	7274	5	8822	2	3	0.08	-0.08	0.16	0.219	40	17.58	3.12	1	0	0.33	0.33	1
OR5L2	1104	7805	5	8904	2	3	0.21	0	0.21	0.118	40	12.38	4.71	1	0	0.33	0.33	1
OR4K13	1330	7576	5	8901	2	3	0.09	-0.04	0.18	0.17	40	14.92	3.8	1	0	0.33	0.33	1
TAF2	1475	6617	5	8087	2	3	0.08	-0.08	0.17	0.218	40	18.21	2.99	1	0	0.33	0.33	1
SLK	2104	6802	25	8882	7	17	0.06	-0.19	0.31	0.331	28	23.61	1.33	6	3	0.00105	0.331	1
KRT37	1134	5999	41	7092	10	31	0.31	-0.16	0.79	0.123	24.39	15.85	1.71	4	8	0.331	0.331	1
GAA	1739	6622	54	8309	13	39	0.15	-0.33	0.51	0.332	24.07	20.77	1.27	9	12	0.0111	0.332	1
SRPR	1777	6912	6	8683	2	4	0.07	-0.07	0.14	0.334	33.33	20.44	1.94	2	0	0.028	0.334	1
BCAN	1071	7822	10	8883	2	8	0.11	-0.16	0.21	0.334	20	12.03	1.83	2	2	0.189	0.334	1
SLC6A3	952	7819	14	8757	3	11	0.24	-0.12	0.35	0.195	21.43	10.84	2.24	2	3	0.334	0.334	1
ITGBL1	1336	7568	39	8866	7	31	0.09	-0.26	0.44	0.335	17.95	14.99	1.28	3	3	0.048	0.335	1
CHIT1	1249	7656	15	8890	3	12	0.09	-0.19	0.28	0.336	20	14.02	1.53	2	1	0.0681	0.336	1
ADCK3	1318	7584	33	8870	6	26	0.09	-0.27	0.45	0.337	18.18	14.79	1.33	2	4	0.33	0.337	1
NBN	1019	5100	30	6090	6	23	0.12	-0.35	0.59	0.339	20	16.63	1.31	5	5	0.0087	0.339	1
LAMB4	1070	6338	58	7352	10	46	0.22	-0.44	0.71	0.339	17.24	14.42	1.29	5	4	0.00226	0.339	1
CCDC103	1892	6254	5	8141	2	3	0.07	-0.07	0.14	0.339	40	23.22	2.2	2	0	0.043	0.339	1
ZNF556	1128	7740	10	8858	2	8	0.1	-0.15	0.2	0.34	20	12.71	1.72	2	1	0.0741	0.34	1
CASP7	1549	7357	12	8894	3	9	0.08	-0.16	0.23	0.34	25	17.38	1.58	2	2	0.262	0.34	1
SPG7	1458	6719	73	8104	15	58	0.17	-0.42	0.67	0.34	20.55	17.81	1.19	7	8	0.00444	0.34	1
PIK3C2B	1402	7506	53	8855	14	39	0.42	-0.04	0.85	0.0573	26.42	15.67	1.92	3	5	0.341	0.341	1
LAMC2	1149	6888	25	8012	5	20	0.1	-0.25	0.41	0.341	20	14.28	1.5	3	2	0.0255	0.341	1
BTAF1	1073	5223	41	6257	8	31	0.11	-0.39	0.62	0.341	19.51	17.02	1.26	5	8	0.0621	0.341	1
POMT2	1745	7163	43	8865	10	33	0.14	-0.29	0.43	0.341	23.26	19.57	1.24	5	4	0.00937	0.341	1
TTC12	1486	7182	12	8656	3	9	0.08	-0.16	0.24	0.342	25	17.13	1.61	3	1	0.012	0.342	1
HMCN1	1427	7462	152	8739	27	123	0.17	-0.54	0.88	0.344	17.76	16.02	1.15	13	26	0.00273	0.344	1
ALOX12	3121	5787	20	8889	8	11	0.05	-0.15	0.25	0.345	40	35.02	1.35	6	0	3.94e-07	0.345	1
SPINT1	866	8039	47	8858	6	41	0.13	-0.38	0.64	0.345	12.77	9.71	1.36	3	9	0.196	0.345	1
PROCA1	1301	7246	9	8538	4	5	0.27	0	0.36	0.034	44.44	15.19	4.46	3	2	0.347	0.347	1
SYTL1	1837	7059	7	8889	3	4	0.14	-0.07	0.21	0.157	42.86	20.63	2.88	2	1	0.348	0.348	1
HPSE2	1143	6922	8	8058	3	4	0.2	0	0.31	0.0728	37.5	14.15	4.54	2	1	0.348	0.348	1
MMP2	1586	7318	7	8897	3	4	0.15	-0.08	0.23	0.14	42.86	17.79	3.46	2	1	0.348	0.348	1
WDR34	902	8007	8	8902	3	4	0.37	0.12	0.37	0.0157	37.5	10.1	6.66	2	1	0.348	0.348	1
SETDB2	1694	6580	24	8250	6	18	0.07	-0.22	0.37	0.349	25	20.46	1.29	4	2	0.00753	0.349	1
CLEC10A	3463	5445	13	8895	9	4	0.19	0.02	0.33	0.0246	69.23	38.83	3.54	4	1	0.35	0.35	1
ZNF610	1306	7519	8	8817	2	6	0.09	-0.13	0.18	0.35	25	14.79	1.92	2	2	0.292	0.35	1
TRIM16L	2114	6646	20	8740	6	14	0.06	-0.19	0.28	0.35	30	24.12	1.35	5	2	0.002	0.35	1
PITX1	1144	7644	10	8778	2	8	0.1	-0.15	0.2	0.35	20	13.01	1.67	2	1	0.0741	0.35	1
SYNJ2	1663	7138	155	8649	31	121	0.15	-0.56	0.85	0.35	20	18.87	1.1	18	22	1.98e-06	0.35	1
SLC7A4	2225	6680	43	8863	12	30	0.12	-0.24	0.42	0.35	27.91	24.97	1.2	6	8	0.117	0.35	1
DUSP13	1158	5638	19	6777	4	15	0.1	-0.26	0.42	0.351	21.05	17.03	1.3	3	2	0.0298	0.351	1
FMO3	1045	6120	33	7132	6	27	0.11	-0.34	0.56	0.352	18.18	14.57	1.3	1	0	0.118	0.352	1
CLCA2	1794	7115	15	8894	4	11	0.07	-0.14	0.28	0.352	26.67	20.13	1.44	3	1	0.0161	0.352	1
TNKS2	1362	6282	21	7624	6	14	0.27	-0.09	0.45	0.129	28.57	17.79	1.98	3	4	0.353	0.353	1
ABCB1	1135	7772	71	8840	10	57	0.2	-0.45	0.66	0.353	14.08	12.73	1.2	6	9	0.00421	0.353	1
CECR5	1346	7459	9	8796	4	5	0.26	0.04	0.35	0.0244	44.44	15.26	4.43	1	0	0.353	0.353	1
TMC1	928	5754	25	6657	6	19	0.38	-0.13	0.69	0.125	24	13.85	1.96	2	3	0.354	0.354	1
SLC9A3R1	1205	7630	9	8826	2	7	0.1	-0.14	0.19	0.354	22.22	13.63	1.81	1	0	0.176	0.354	1
ITK	989	7074	24	8039	4	20	0.12	-0.29	0.46	0.354	16.67	12.25	1.43	3	5	0.116	0.354	1
HAGH	1162	7684	50	8796	8	42	0.1	-0.35	0.54	0.354	16	13.12	1.26	4	8	0.0826	0.354	1
MPDU1	2888	6019	20	8888	7	12	0.05	-0.15	0.26	0.355	35	32.41	1.22	4	2	0.0495	0.355	1
DUXA	1437	7393	36	8794	7	29	0.08	-0.29	0.42	0.355	19.44	16.26	1.24	6	6	0.00192	0.355	1
NELL1	1142	7767	61	8848	9	52	0.1	-0.4	0.6	0.355	14.75	12.81	1.18	7	6	3.56e-05	0.355	1
TLR1	1224	5121	31	6314	7	24	0.1	-0.35	0.51	0.356	22.58	19.27	1.22	2	0	0.0103	0.356	1
TNFRSF10A	1855	7054	27	8882	7	20	0.07	-0.2	0.34	0.356	25.93	20.81	1.33	4	7	0.309	0.356	1
PNLIPRP1	1680	7229	67	8843	14	52	0.15	-0.37	0.55	0.357	20.9	18.84	1.16	5	5	0.0148	0.357	1
KIF15	1365	7538	31	8872	6	25	0.09	-0.26	0.43	0.357	19.35	15.32	1.33	3	5	0.168	0.357	1
SOS2	1170	7660	24	8806	4	20	0.1	-0.25	0.39	0.358	16.67	13.24	1.31	1	1	0.31	0.358	1
MRTO4	1839	7020	7	8852	2	5	0.07	-0.1	0.14	0.358	28.57	20.75	1.53	1	0	0.23	0.358	1
KLHL25	1136	7726	24	8838	4	20	0.1	-0.25	0.4	0.358	16.67	12.81	1.36	4	7	0.0581	0.358	1
RNMTL1	1669	5329	9	6989	3	6	0.08	-0.16	0.24	0.358	33.33	23.84	1.6	1	0	0.257	0.358	1
STARD3	1159	7333	21	8471	5	16	0.2	-0.1	0.5	0.137	23.81	13.62	1.98	2	3	0.359	0.359	1
FARP1	2212	6690	30	8872	9	21	0.06	-0.21	0.36	0.36	30	24.83	1.3	2	2	0.317	0.36	1
MYBPH	1219	7689	15	8893	3	12	0.1	-0.19	0.29	0.36	20	13.67	1.58	2	2	0.169	0.36	1
LCP1	1303	7574	33	8844	6	27	0.09	-0.27	0.45	0.36	18.18	14.67	1.29	5	1	8.46e-06	0.36	1
PINK1	1813	7087	22	8878	7	15	0.14	-0.14	0.42	0.183	31.82	20.34	1.82	2	2	0.363	0.363	1
ADAMTS14	1948	6960	43	8865	12	31	0.2	-0.2	0.49	0.211	27.91	21.84	1.38	4	7	0.363	0.363	1
EXPH5	1450	7459	19	8890	4	15	0.08	-0.21	0.33	0.363	21.05	16.27	1.37	4	2	0.00261	0.363	1
HAP1	1814	7073	19	8868	6	13	0.14	-0.14	0.35	0.203	31.58	20.39	1.8	2	2	0.364	0.364	1
ZNF470	1733	7170	20	8883	5	15	0.07	-0.21	0.29	0.364	25	19.45	1.38	3	3	0.123	0.364	1
SPECC1	2186	6699	32	8853	9	23	0.06	-0.21	0.36	0.365	28.12	24.59	1.2	3	2	0.0775	0.365	1
SECISBP2	1497	6894	17	8374	4	13	0.08	-0.2	0.33	0.365	23.53	17.83	1.42	3	1	0.0104	0.365	1
ACSM5	1223	6759	13	7969	3	10	0.1	-0.19	0.29	0.365	23.08	15.31	1.66	2	2	0.224	0.365	1
SPARCL1	945	6938	11	7873	2	8	0.12	-0.18	0.24	0.365	18.18	11.98	1.84	2	2	0.189	0.365	1
HEXB	1647	7224	44	8829	9	33	0.07	-0.3	0.45	0.366	20.45	18.55	1.2	6	7	0.0105	0.366	1
ARFGAP3	1243	6237	9	7472	2	6	0.1	-0.14	0.19	0.366	22.22	16.61	1.67	2	0	0.0146	0.366	1
CHRNA9	1035	7863	58	8840	8	50	0.11	-0.44	0.6	0.366	13.79	11.62	1.22	5	7	0.00515	0.366	1
TBL3	1273	7434	22	8686	4	17	0.09	-0.23	0.37	0.361	18.18	14.61	1.37	2	4	0.367	0.367	1
SEC24C	938	7487	26	8400	4	21	0.12	-0.24	0.48	0.315	15.38	11.12	1.52	2	5	0.367	0.367	1
FLG2	1700	6501	37	8165	10	26	0.07	-0.3	0.45	0.367	27.03	20.7	1.47	4	0	3.5e-05	0.367	1
FAM57A	2012	5912	9	7915	4	5	0.13	-0.07	0.27	0.161	44.44	25.37	2.35	2	1	0.367	0.367	1
TM4SF5	4312	4596	5	8903	4	1	0.09	-0.02	0.18	0.168	80	48.39	4.26	2	0	0.367	0.367	1
EYS	950	7951	14	8888	4	9	0.35	0	0.47	0.0397	28.57	10.64	3.72	2	2	0.367	0.367	1
FAM189A2	930	7543	16	8457	3	13	0.12	-0.18	0.36	0.248	18.75	10.96	1.87	3	7	0.368	0.368	1
RASAL1	962	7929	20	8871	3	17	0.12	-0.23	0.35	0.368	15	10.81	1.45	2	5	0.358	0.368	1
FOXN1	1326	7550	46	8830	8	38	0.09	-0.35	0.49	0.369	17.39	14.93	1.2	5	8	0.028	0.369	1
NID1	1483	7021	50	8454	10	40	0.08	-0.33	0.49	0.37	20	17.42	1.18	4	10	0.304	0.37	1
SLC26A1	1067	7396	21	8443	4	16	0.11	-0.21	0.43	0.269	19.05	12.59	1.73	1	1	0.37	0.37	1
ARHGEF11	1032	6510	10	7532	3	7	0.22	-0.11	0.34	0.15	30	13.66	2.7	2	2	0.37	0.37	1
AZU1	1647	6984	7	8624	2	5	0.08	-0.11	0.15	0.37	28.57	19.07	1.7	2	0	0.0197	0.37	1
OXNAD1	1651	7258	10	8899	3	7	0.07	-0.07	0.22	0.236	30	18.52	1.88	2	2	0.37	0.37	1
CATSPER1	1273	7633	98	8811	16	79	0.18	-0.41	0.78	0.299	16.33	14.27	1.21	4	14	0.372	0.372	1
NFATC4	1592	7316	12	8896	3	9	0.08	-0.15	0.23	0.372	25	17.86	1.53	2	0	0.014	0.372	1
TLCD1	1150	7380	25	8505	4	21	0.1	-0.25	0.4	0.372	16	13.47	1.22	4	3	0.0028	0.372	1
CYB5R1	975	4715	26	5664	8	18	0.5	-0.06	0.87	0.0634	30.77	17.07	2.15	5	8	0.372	0.372	1
MAN2A1	1326	7106	32	8400	6	26	0.09	-0.27	0.45	0.374	18.75	15.71	1.24	4	4	0.0176	0.374	1
SPTB	2113	6052	50	8117	17	31	0.32	-0.1	0.64	0.0968	34	25.82	1.57	4	5	0.375	0.375	1
IFIT5	927	6508	40	7395	6	34	0.12	-0.43	0.62	0.375	15	12.45	1.24	4	7	0.0422	0.375	1
CRIP3	1022	7886	11	8897	2	9	0.11	-0.22	0.22	0.375	18.18	11.46	1.71	2	2	0.156	0.375	1
ART1	973	6273	7	7239	2	5	0.12	-0.12	0.24	0.235	28.57	13.41	2.58	2	2	0.376	0.376	1
MMP8	1993	6916	15	8895	4	10	0.06	-0.13	0.26	0.376	26.67	22.36	1.39	2	1	0.14	0.376	1
PLCD1	1233	3772	49	4957	13	35	0.11	-0.48	0.75	0.377	26.53	24.61	1.14	6	10	0.199	0.377	1
TLR10	1365	6315	27	7653	6	21	0.09	-0.27	0.4	0.378	22.22	17.76	1.32	3	2	0.0361	0.378	1
CD300LB	1475	7328	8	8795	2	6	0.08	-0.12	0.16	0.379	25	16.75	1.66	1	0	0.199	0.379	1
GRIN3A	1830	7076	24	8882	6	18	0.07	-0.21	0.31	0.365	25	20.54	1.29	2	3	0.379	0.379	1
ADAMTSL1	2181	6705	32	8854	9	23	0.06	-0.24	0.33	0.38	28.12	24.53	1.2	5	9	0.356	0.38	1
PPP1R15A	1810	6358	6	8162	2	4	0.07	-0.11	0.14	0.381	33.33	22.15	1.76	2	1	0.216	0.381	1
IGHMBP2	1141	7524	62	8604	13	48	0.5	-0.05	0.96	0.0539	20.97	13.11	1.79	6	17	0.381	0.381	1
PRDM7	1512	7384	42	8855	8	33	0.08	-0.32	0.44	0.381	19.05	16.98	1.18	4	5	0.0436	0.381	1
GOT2	1171	7163	16	8318	3	13	0.1	-0.2	0.3	0.382	18.75	14.04	1.41	2	2	0.149	0.382	1
TRPM8	1194	7710	42	8863	11	30	0.58	0.1	0.92	0.0153	26.19	13.35	2.37	5	10	0.384	0.384	1
PTPN3	1475	7247	36	8687	7	28	0.08	-0.29	0.41	0.385	19.44	16.9	1.23	6	5	0.000915	0.385	1
ALAS1	1114	6143	45	7213	8	36	0.11	-0.42	0.58	0.385	17.78	15.33	1.23	4	4	0.0166	0.385	1
GPR113	1085	7794	16	8863	3	13	0.1	-0.21	0.31	0.291	18.75	12.21	1.66	2	4	0.386	0.386	1
KIF2B	1230	7469	16	8683	3	13	0.09	-0.19	0.28	0.377	18.75	14.13	1.4	2	4	0.386	0.386	1
SFXN3	1830	6993	20	8803	5	15	0.07	-0.21	0.28	0.386	25	20.73	1.27	3	3	0.123	0.386	1
RRP9	903	4235	18	5120	4	14	0.13	-0.34	0.54	0.388	22.22	17.56	1.34	2	1	0.0815	0.388	1
PCDHB7	1746	6163	37	7873	9	27	0.07	-0.29	0.4	0.388	24.32	22.06	1.18	5	5	0.0305	0.388	1
TIMM44	1496	7397	13	8880	6	7	0.32	0.08	0.48	0.00946	46.15	16.78	4.24	2	1	0.389	0.389	1
PNPLA2	1755	7067	13	8809	6	7	0.21	0	0.43	0.0362	46.15	19.85	3.45	2	1	0.389	0.389	1
ANKRD16	1456	7424	9	8872	2	6	0.08	-0.12	0.16	0.389	22.22	16.39	1.7	1	0	0.199	0.389	1
CNNM1	935	7860	13	8782	6	7	0.6	0.3	0.72	0.000568	46.15	10.58	7.21	2	1	0.389	0.389	1
SERPINB10	1424	5200	28	6596	7	21	0.09	-0.31	0.45	0.389	25	21.48	1.22	3	2	0.053	0.389	1
EFCAB6	1970	6935	29	8877	7	21	0.07	-0.23	0.33	0.391	24.14	22.11	1.17	4	4	0.0605	0.391	1
FGL1	1408	7073	30	8451	6	24	0.09	-0.3	0.38	0.392	20	16.59	1.26	3	7	0.353	0.392	1
TEP1	1947	6954	37	8864	9	28	0.07	-0.26	0.36	0.392	24.32	21.86	1.15	5	5	0.0264	0.392	1
HABP2	2043	6866	77	8832	19	58	0.13	-0.38	0.54	0.393	24.68	22.92	1.1	9	11	0.0084	0.393	1
EMID1	1032	6859	17	7874	3	14	0.11	-0.22	0.33	0.393	17.65	13.07	1.42	3	2	0.0162	0.393	1
TBX10	1201	7700	29	8872	5	24	0.1	-0.29	0.39	0.352	17.24	13.48	1.34	2	5	0.394	0.394	1
SYNE1	3695	5214	74	8836	32	41	0.09	-0.3	0.44	0.394	43.24	41.46	1.1	10	4	0.0018	0.394	1
LRP4	1176	7732	143	8767	20	121	0.2	-0.64	0.88	0.394	13.99	13.19	1.09	13	12	1.26e-08	0.394	1
THRB	929	5416	36	6309	10	26	0.63	0	1.07	0.0305	27.78	14.57	2.24	3	5	0.395	0.395	1
AARS2	1392	7498	33	8857	7	26	0.17	-0.21	0.47	0.254	21.21	15.64	1.45	2	4	0.395	0.395	1
PCDHB6	1359	7546	8	8897	2	6	0.09	-0.13	0.17	0.395	25	15.25	1.85	2	0	0.0146	0.395	1
MACF1	2053	6856	61	8849	15	45	0.06	-0.35	0.47	0.397	24.59	23.03	1.11	11	6	9.81e-07	0.397	1
SLC7A13	928	5289	39	6178	7	32	0.13	-0.44	0.63	0.397	17.95	14.91	1.25	3	8	0.34	0.397	1
OR1J2	1985	6761	14	8732	4	10	0.07	-0.16	0.23	0.4	28.57	22.69	1.36	2	1	0.14	0.4	1
NBPF3	1295	7604	23	8876	4	19	0.09	-0.27	0.36	0.4	17.39	14.54	1.24	2	3	0.212	0.4	1
OR5AU1	1011	7727	12	8726	2	10	0.11	-0.22	0.22	0.4	16.67	11.56	1.53	1	0	0.13	0.4	1
HSPA8	928	4070	7	4991	2	5	0.13	-0.2	0.26	0.401	28.57	18.55	1.75	2	2	0.376	0.401	1
PNPT1	902	7901	13	8790	2	11	0.12	-0.25	0.25	0.401	15.38	10.24	1.59	2	1	0.043	0.401	1
FMN2	1336	7550	9	8877	2	7	0.09	-0.18	0.18	0.401	22.22	15.03	1.61	2	0	0.0112	0.401	1
PDE12	1218	6015	8	7225	2	6	0.1	-0.2	0.2	0.401	25	16.83	1.65	1	0	0.199	0.401	1
SLC37A2	1834	6805	20	8619	5	15	0.07	-0.21	0.28	0.402	25	21.22	1.24	2	3	0.391	0.402	1
SDHB	2129	6776	44	8863	11	31	0.06	-0.28	0.37	0.403	25	23.9	1.13	10	4	1.52e-07	0.403	1
SLC2A9	1709	7198	30	8877	7	23	0.07	-0.22	0.36	0.34	23.33	19.17	1.28	1	1	0.403	0.403	1
NEDD4	1511	7395	31	8875	6	25	0.08	-0.28	0.36	0.405	19.35	16.96	1.17	3	2	0.0231	0.405	1
CAMK1	928	4278	8	5198	2	6	0.13	-0.26	0.26	0.407	25	17.81	1.54	2	2	0.292	0.407	1
HEATR1	2327	6582	10	8899	5	5	0.12	-0.03	0.29	0.0892	50	26.09	2.83	1	0	0.407	0.407	1
CUTC	1357	7552	24	8887	4	18	0.09	-0.26	0.35	0.408	16.67	15.22	1.24	2	0	0.00657	0.408	1
CGN	1279	7621	49	8852	8	40	0.09	-0.37	0.5	0.409	16.33	14.36	1.19	3	8	0.281	0.409	1
DBH	1754	7096	26	8825	6	19	0.07	-0.21	0.32	0.371	23.08	19.81	1.28	3	6	0.41	0.41	1
TARS2	936	6878	18	7796	4	14	0.24	-0.12	0.49	0.183	22.22	11.95	2.1	1	1	0.41	0.41	1
CHMP5	946	7963	5	8904	1	4	0.12	-0.12	0.12	0.41	20	10.61	2.1	1	0	0.19	0.41	1
SIGLEC10	1043	7862	19	8887	4	14	0.22	-0.11	0.43	0.134	21.05	11.69	2.15	1	1	0.41	0.41	1
L2HGDH	1209	7250	22	8437	4	18	0.1	-0.29	0.34	0.41	18.18	14.28	1.33	3	2	0.0185	0.41	1
ARVCF	1095	7687	18	8764	4	14	0.21	-0.16	0.42	0.218	22.22	12.45	2.01	1	1	0.41	0.41	1
TEC	1063	7464	18	8509	3	15	0.11	-0.27	0.32	0.411	16.67	12.46	1.4	2	0	0.00562	0.411	1
REN	1278	7522	10	8790	2	8	0.09	-0.18	0.18	0.411	20	14.52	1.47	1	0	0.158	0.411	1
TG	2291	6618	100	8809	27	73	0.06	-0.44	0.56	0.411	27	25.7	1.07	13	14	0.00119	0.411	1
MTR	1585	7306	47	8845	9	37	0.08	-0.35	0.42	0.411	19.15	17.82	1.12	3	3	0.0573	0.411	1
SRR	3136	5772	21	8888	8	12	0.05	-0.17	0.25	0.412	38.1	35.19	1.23	6	0	2.46e-07	0.412	1
AP4B1	947	7961	13	8895	2	11	0.12	-0.24	0.24	0.412	15.38	10.62	1.53	2	0	0.00506	0.412	1
DHRS3	909	7595	22	8482	3	19	0.12	-0.31	0.37	0.413	13.64	10.68	1.32	3	3	0.0186	0.413	1
DOCK5	2666	6213	6	8873	3	3	0.05	-0.05	0.16	0.226	50	30.01	2.33	1	0	0.414	0.414	1
HEATR5B	1066	7836	15	8888	3	11	0.11	-0.11	0.32	0.227	20	11.96	2	1	1	0.414	0.414	1
ALDH5A1	1890	6873	32	8731	8	24	0.07	-0.27	0.34	0.414	25	21.56	1.21	4	4	0.0615	0.414	1
CA10	1183	7579	10	8752	2	8	0.1	-0.2	0.2	0.415	20	13.49	1.6	1	0	0.158	0.415	1
SCN3A	886	6398	74	7211	10	63	0.13	-0.64	0.77	0.415	13.51	12.15	1.15	5	10	0.023	0.415	1
THUMPD3	1489	7311	8	8792	2	6	0.08	-0.16	0.16	0.416	25	16.91	1.64	2	2	0.292	0.416	1
KDM5B	1157	7514	32	8640	5	26	0.1	-0.3	0.4	0.417	15.62	13.33	1.25	3	7	0.216	0.417	1
GJB5	1259	6971	53	8177	9	44	0.09	-0.42	0.52	0.418	16.98	15.29	1.13	4	9	0.141	0.418	1
ZNF432	1117	5356	36	6437	8	28	0.22	-0.32	0.65	0.273	22.22	17.23	1.37	2	4	0.418	0.418	1
BRIP1	1175	7707	61	8821	9	52	0.1	-0.44	0.59	0.419	14.75	13.22	1.14	7	5	1.17e-05	0.419	1
C19orf44	1211	7631	10	8832	2	8	0.1	-0.19	0.19	0.419	20	13.69	1.58	1	0	0.158	0.419	1
AK7	1296	7518	22	8792	4	18	0.09	-0.27	0.32	0.42	18.18	14.7	1.29	4	1	0.000182	0.42	1
SEC23IP	961	7283	30	8215	4	25	0.12	-0.35	0.41	0.42	13.33	11.65	1.21	4	4	0.00387	0.42	1
POLR2A	3172	5736	12	8896	5	7	0.05	-0.12	0.2	0.421	41.67	35.6	1.29	2	1	0.314	0.421	1
WBP2NL	993	7102	10	8085	2	8	0.11	-0.23	0.23	0.379	20	12.26	1.79	1	1	0.421	0.421	1
CADM4	908	7997	10	8895	2	8	0.12	-0.12	0.25	0.285	20	10.19	2.2	1	1	0.421	0.421	1
TP53BP2	1160	7212	10	8362	2	8	0.1	-0.2	0.2	0.406	20	13.85	1.55	1	1	0.421	0.421	1
MAN2B2	1527	7381	65	8844	12	52	0.08	-0.4	0.51	0.421	18.46	17.13	1.12	5	14	0.269	0.421	1
COL22A1	2274	6635	166	8744	44	121	0.12	-0.56	0.74	0.421	26.51	25.5	1.06	20	31	0.00519	0.421	1
SERPINF2	2339	6371	19	8691	6	13	0.06	-0.18	0.23	0.421	31.58	26.84	1.26	3	4	0.402	0.421	1
IMPG1	1241	6645	15	7871	4	11	0.19	-0.14	0.38	0.205	26.67	15.72	1.95	3	5	0.422	0.422	1
C1orf168	1374	7343	15	8702	3	12	0.09	-0.22	0.26	0.422	20	15.75	1.34	1	1	0.388	0.422	1
PALLD	1248	7590	23	8815	4	19	0.09	-0.28	0.33	0.423	17.39	14.11	1.28	2	4	0.315	0.423	1
TMPRSS4	1281	7621	38	8865	6	31	0.09	-0.32	0.41	0.423	15.79	14.38	1.15	5	6	0.00502	0.423	1
PMS2	1124	7599	48	8675	7	41	0.1	-0.41	0.51	0.423	14.58	12.88	1.15	3	9	0.263	0.423	1
TMPRSS15	1472	7371	54	8789	10	44	0.08	-0.37	0.49	0.424	18.52	16.63	1.14	5	8	0.0404	0.424	1
SDK2	1827	7021	11	8837	3	8	0.07	-0.14	0.21	0.425	27.27	20.64	1.44	3	0	0.000657	0.425	1
LRP5	894	7999	141	8753	15	125	0.12	-0.81	0.93	0.425	10.64	10.04	1.07	6	33	0.234	0.425	1
KIAA1324	1116	7784	12	8888	4	8	0.2	0	0.41	0.0682	33.33	12.51	3.49	2	2	0.426	0.426	1
SNCB	1907	7002	20	8890	5	14	0.07	-0.2	0.27	0.367	25	21.39	1.31	2	3	0.426	0.426	1
BSND	990	7813	13	8791	4	8	0.34	0	0.46	0.0391	30.77	11.22	3.95	2	2	0.426	0.426	1
ZNF215	1576	7332	8	8900	2	6	0.08	-0.15	0.15	0.427	25	17.69	1.55	1	0	0.199	0.427	1
ALDH3A1	1573	6846	55	8365	11	43	0.08	-0.39	0.47	0.427	20	18.67	1.11	7	6	0.000611	0.427	1
ACADVL	2686	5433	90	8034	30	55	0.06	-0.42	0.53	0.427	33.33	33.06	1.1	17	13	0.00023	0.427	1
NLRP10	1533	7345	19	8859	4	15	0.08	-0.24	0.28	0.427	21.05	17.26	1.28	3	5	0.226	0.427	1
COCH	994	7725	23	8697	3	19	0.11	-0.28	0.34	0.428	13.04	11.39	1.23	3	1	0.00159	0.428	1
CNGA4	1618	7290	79	8830	15	63	0.08	-0.45	0.57	0.429	18.99	18.15	1.07	10	13	0.000392	0.429	1
CCDC87	950	7950	5	8895	1	4	0.12	-0.12	0.12	0.429	20	10.67	2.09	1	0	0.19	0.429	1
HERC2	1062	7844	47	8859	6	41	0.11	-0.43	0.48	0.429	12.77	11.92	1.08	4	5	0.0074	0.429	1
OR1L3	1534	7057	8	8583	2	6	0.08	-0.16	0.16	0.43	25	17.85	1.53	2	1	0.118	0.43	1
OR51V1	1047	7862	15	8894	3	12	0.11	-0.11	0.32	0.224	20	11.74	1.88	2	4	0.43	0.43	1
CRELD1	2167	6739	50	8856	13	37	0.06	-0.3	0.4	0.43	26	24.32	1.09	6	6	0.0215	0.43	1
CBS	1141	7219	54	8306	8	46	0.1	-0.46	0.51	0.431	14.81	13.64	1.1	5	8	0.0128	0.431	1
PTPRM	1587	7312	25	8875	5	19	0.08	-0.23	0.31	0.431	20	17.83	1.21	2	2	0.167	0.431	1
FANCI	1503	5744	60	7188	13	46	0.08	-0.46	0.55	0.432	21.67	20.73	1.08	4	8	0.238	0.432	1
CATSPER4	1877	6348	64	8161	16	48	0.07	-0.41	0.52	0.433	25	22.8	1.13	8	12	0.045	0.433	1
PSMC1	970	7843	17	8796	4	13	0.23	-0.06	0.46	0.0975	23.53	10.98	2.49	1	1	0.433	0.433	1
SCARB2	881	5509	17	6373	3	14	0.13	-0.33	0.39	0.433	17.65	13.78	1.34	2	2	0.132	0.433	1
C9orf156	994	6918	19	7893	4	15	0.23	-0.17	0.46	0.216	21.05	12.54	1.86	2	4	0.433	0.433	1
PFKM	993	7521	46	8469	6	39	0.11	-0.46	0.51	0.434	13.04	11.65	1.17	6	5	4.17e-05	0.434	1
TNNT1	1443	7463	15	8891	3	12	0.08	-0.21	0.25	0.436	20	16.2	1.29	2	4	0.43	0.436	1
TMCO4	1641	7190	23	8808	5	18	0.07	-0.22	0.3	0.437	21.74	18.57	1.22	3	1	0.0082	0.437	1
NIPSNAP3A	1586	7317	13	8891	3	9	0.08	-0.15	0.23	0.323	23.08	17.8	1.54	2	3	0.437	0.437	1
TNC	2320	6589	47	8862	13	34	0.06	-0.29	0.38	0.437	27.66	26.03	1.09	8	5	0.000455	0.437	1
MARS	1181	7727	11	8897	2	9	0.1	-0.2	0.2	0.437	18.18	13.25	1.45	1	1	0.386	0.437	1
ZNF547	1499	7407	20	8886	4	16	0.08	-0.24	0.28	0.438	20	16.82	1.24	3	3	0.0625	0.438	1
PDGFRL	1569	7337	24	8884	6	16	0.15	-0.12	0.39	0.169	25	17.59	1.75	2	3	0.439	0.439	1
AMIGO3	2340	6563	6	8897	2	4	0.06	-0.12	0.12	0.439	33.33	26.28	1.4	2	0	0.028	0.439	1
KLHL1	1154	6008	22	7141	4	17	0.1	-0.31	0.36	0.441	18.18	16.1	1.22	2	2	0.145	0.441	1
TNS4	1278	6103	13	7368	3	10	0.09	-0.24	0.28	0.441	23.08	17.3	1.43	2	1	0.0923	0.441	1
ARSB	1564	7140	67	8637	13	54	0.08	-0.43	0.51	0.442	19.4	17.96	1.1	6	19	0.373	0.442	1
RASA3	1825	7032	30	8827	7	23	0.07	-0.28	0.35	0.442	23.33	20.6	1.17	3	4	0.176	0.442	1
ASMT	1160	6983	8	8135	2	6	0.1	-0.2	0.2	0.442	25	14.23	2.01	1	0	0.199	0.442	1
MFN2	1520	7094	42	8572	8	34	0.08	-0.36	0.4	0.443	19.05	17.64	1.1	3	4	0.0983	0.443	1
LYZL6	1018	5104	13	6109	3	10	0.12	-0.24	0.35	0.357	23.08	16.61	1.5	1	1	0.444	0.444	1
TRIML1	1040	7549	11	8578	2	9	0.11	-0.22	0.22	0.444	18.18	12.1	1.61	2	1	0.0607	0.444	1
DDX27	1203	7520	13	8710	3	10	0.1	-0.14	0.29	0.255	23.08	13.78	1.88	1	1	0.444	0.444	1
SERPINB5	1360	7545	14	8892	3	10	0.09	-0.17	0.26	0.335	21.43	15.26	1.66	1	1	0.444	0.444	1
CIT	1340	7558	15	8883	3	12	0.09	-0.22	0.26	0.444	20	15.05	1.41	2	2	0.169	0.444	1
PFKFB2	1328	7528	22	8834	4	18	0.09	-0.27	0.31	0.445	18.18	14.99	1.26	2	3	0.231	0.445	1
SCUBE1	1451	7337	44	8744	8	36	0.08	-0.37	0.41	0.445	18.18	16.5	1.12	5	8	0.0348	0.445	1
C1QA	915	5406	11	6311	2	8	0.13	-0.26	0.26	0.446	18.18	14.47	1.48	1	1	0.421	0.446	1
ATP6V1B1	1022	7721	60	8684	8	51	0.11	-0.5	0.61	0.413	13.33	11.68	1.19	2	8	0.447	0.447	1
SLC7A9	1009	5532	66	6475	11	55	0.12	-0.64	0.7	0.447	16.67	15.41	1.1	5	11	0.0799	0.447	1
CADPS	1347	7562	22	8888	7	14	0.35	0	0.57	0.035	31.82	15.08	2.81	3	4	0.448	0.448	1
NDUFA10	1162	7132	25	8270	4	20	0.1	-0.3	0.35	0.449	16	14	1.23	2	1	0.0441	0.449	1
MPO	1802	6211	61	7954	14	45	0.07	-0.39	0.5	0.45	22.95	22.48	1.07	5	9	0.181	0.45	1
FHOD3	1398	7412	9	8801	3	6	0.17	-0.09	0.26	0.181	33.33	15.85	2.65	2	2	0.45	0.45	1
SLC39A2	1338	7565	10	8893	2	8	0.09	-0.18	0.18	0.45	20	15.02	1.41	1	0	0.158	0.45	1
DMXL1	1146	6921	9	8058	3	6	0.2	-0.05	0.31	0.117	33.33	14.18	3.02	2	2	0.45	0.45	1
DCAF4	1616	7286	9	8893	3	6	0.08	-0.08	0.23	0.22	33.33	18.14	2.25	2	2	0.45	0.45	1
TAAR2	1403	7160	9	8554	3	6	0.17	-0.09	0.26	0.154	33.33	16.37	2.55	2	2	0.45	0.45	1
PNLDC1	2447	6444	12	8879	4	8	0.06	-0.14	0.17	0.451	33.33	27.51	1.32	3	1	0.0355	0.451	1
HECW2	1205	7704	11	8898	2	9	0.1	-0.19	0.19	0.451	18.18	13.52	1.42	1	0	0.143	0.451	1
ANK1	1887	7021	53	8856	12	40	0.07	-0.37	0.4	0.452	22.64	21.17	1.12	6	9	0.058	0.452	1
KRT33A	1240	7514	57	8698	9	47	0.09	-0.47	0.52	0.452	15.79	14.15	1.16	6	12	0.0241	0.452	1
NFASC	1584	7325	19	8890	4	15	0.08	-0.23	0.27	0.452	21.05	17.77	1.23	3	2	0.0298	0.452	1
DHCR7	1009	7843	53	8800	7	45	0.11	-0.45	0.56	0.452	13.21	11.39	1.21	6	9	0.00147	0.452	1
SLC14A1	1242	7564	9	8797	2	7	0.09	-0.19	0.19	0.452	22.22	14.1	1.74	2	1	0.0923	0.452	1
SERPINB6	1419	7490	38	8871	11	27	0.42	0	0.75	0.0319	28.95	15.87	2.15	2	3	0.453	0.453	1
CPS1	1627	7282	109	8803	20	86	0.08	-0.53	0.64	0.453	18.35	18.26	1.04	7	14	0.0479	0.453	1
KRT15	1927	6981	60	8848	14	46	0.07	-0.36	0.46	0.454	23.33	21.62	1.1	10	9	0.000124	0.454	1
LRP1B	2273	6636	336	8577	86	246	0.06	-0.86	0.97	0.454	25.6	25.5	1.02	34	45	5.42e-06	0.454	1
VCAN	1870	7031	68	8833	15	53	0.07	-0.41	0.47	0.454	22.06	21	1.06	10	8	2.97e-05	0.454	1
WDR41	1371	7436	44	8765	7	35	0.09	-0.35	0.43	0.456	15.91	15.56	1.08	7	4	3.4e-06	0.456	1
ITPR3	2201	6704	179	8726	45	134	0.06	-0.63	0.75	0.456	25.14	24.71	1.02	24	30	1.18e-05	0.456	1
LTBP2	1457	6945	65	8338	12	52	0.08	-0.46	0.54	0.456	18.46	17.33	1.1	8	16	0.0229	0.456	1
GH1	1440	7200	38	8602	7	31	0.08	-0.33	0.42	0.457	18.42	16.66	1.13	6	9	0.0107	0.457	1
TRIM3	1473	6553	13	8013	3	10	0.08	-0.21	0.25	0.458	23.08	18.35	1.33	2	1	0.0923	0.458	1
COX15	1189	7584	33	8740	5	28	0.1	-0.34	0.39	0.458	15.15	13.55	1.14	3	7	0.183	0.458	1
TTC7B	1205	7647	16	8836	4	12	0.19	-0.1	0.38	0.174	25	13.59	2.12	1	1	0.458	0.458	1
PGD	1478	5275	7	6746	2	5	0.09	-0.17	0.17	0.458	28.57	21.88	1.43	1	0	0.23	0.458	1
DTYMK	1392	7395	16	8771	4	12	0.17	-0.17	0.34	0.252	25	15.82	1.77	1	1	0.458	0.458	1
FURIN	1386	7513	42	8857	8	34	0.17	-0.26	0.51	0.292	19.05	15.56	1.28	3	9	0.459	0.459	1
F12	1217	7344	33	8528	9	24	0.38	0	0.77	0.0337	27.27	14.17	2.26	4	8	0.459	0.459	1
FHL3	1142	7761	27	8876	4	23	0.1	-0.3	0.35	0.459	14.81	12.82	1.18	4	3	0.002	0.459	1
AGMAT	1545	5914	54	7405	12	42	0.08	-0.45	0.49	0.46	22.22	20.7	1.09	9	7	5.41e-05	0.46	1
SPTLC2	1113	7776	19	8870	3	16	0.1	-0.26	0.31	0.461	15.79	12.51	1.31	3	3	0.0295	0.461	1
APC	1292	7249	172	8372	26	143	0.09	-0.78	0.87	0.461	15.12	15.12	1.02	17	29	1.95e-06	0.461	1
CUL9	927	7980	24	8883	3	21	0.12	-0.36	0.36	0.462	12.5	10.4	1.23	2	6	0.34	0.462	1
SMARCA5	1033	7876	22	8887	3	19	0.11	-0.33	0.33	0.463	13.64	11.59	1.2	1	2	0.414	0.463	1
FBN2	1947	6925	217	8659	48	165	0.07	-0.72	0.82	0.463	22.12	21.93	1.03	30	25	3.49e-13	0.463	1
KIAA0196	954	5016	60	5911	10	49	0.12	-0.62	0.75	0.463	16.67	15.97	1.07	2	6	0.429	0.463	1
NIP7	932	6205	9	7128	2	7	0.12	-0.12	0.25	0.323	22.22	13.05	1.9	1	1	0.464	0.464	1
SLC18A1	1935	6966	30	8871	7	23	0.07	-0.26	0.33	0.464	23.33	21.73	1.1	5	5	0.0188	0.464	1
DOPEY1	979	7923	9	8893	2	7	0.11	-0.11	0.23	0.256	22.22	10.99	2.31	1	1	0.464	0.464	1
IQGAP3	1410	7499	42	8868	7	34	0.08	-0.34	0.42	0.464	16.67	15.82	1.09	3	6	0.173	0.464	1
ZNF45	1185	7721	14	8892	5	9	0.29	0.05	0.49	0.0268	35.71	13.27	3.62	2	2	0.466	0.466	1
PMFBP1	2004	6892	18	8878	5	13	0.06	-0.19	0.26	0.394	27.78	22.52	1.32	2	3	0.466	0.466	1
GOLGB1	1323	7359	14	8668	5	9	0.27	0	0.45	0.0533	35.71	15.21	3.09	2	2	0.466	0.466	1
MPI	944	6987	38	7894	5	32	0.12	-0.42	0.48	0.467	13.16	11.9	1.16	2	4	0.192	0.467	1
EIF2B5	1461	7447	71	8838	12	58	0.08	-0.45	0.53	0.468	16.9	16.4	1.05	4	8	0.105	0.468	1
SLC6A9	935	7901	25	8811	3	22	0.12	-0.36	0.36	0.468	12	10.58	1.15	1	2	0.369	0.468	1
TPM2	2474	6435	16	8893	5	11	0.06	-0.17	0.22	0.47	31.25	27.76	1.18	2	0	0.0233	0.47	1
NDUFA9	1492	7416	27	8881	5	22	0.08	-0.28	0.32	0.47	18.52	16.74	1.13	3	4	0.0936	0.47	1
CSMD2	1851	7057	26	8882	6	20	0.07	-0.27	0.27	0.471	23.08	20.77	1.14	4	5	0.0821	0.471	1
PRKAR1A	1134	7755	5	8884	1	4	0.1	-0.1	0.1	0.472	20	12.75	1.71	1	0	0.19	0.472	1
TMEM44	1158	7713	12	8859	2	10	0.1	-0.2	0.2	0.472	16.67	13.05	1.33	2	2	0.131	0.472	1
RNASEL	1027	7872	19	8881	4	14	0.22	-0.11	0.44	0.16	21.05	11.52	2.19	2	4	0.472	0.472	1
DDOST	2123	6784	23	8884	6	17	0.06	-0.22	0.25	0.472	26.09	23.83	1.13	3	1	0.0157	0.472	1
CIDEB	1707	7201	8	8900	4	4	0.22	0	0.29	0.0381	50	19.13	4.22	2	1	0.472	0.472	1
NR1H3	1434	7475	36	8875	6	28	0.08	-0.33	0.33	0.473	16.67	16.09	1.12	3	5	0.131	0.473	1
TMEM171	1016	7892	14	8894	2	12	0.11	-0.22	0.22	0.467	14.29	11.4	1.29	1	2	0.473	0.473	1
ADCK1	1297	7439	25	8712	8	16	0.36	0.05	0.63	0.0204	32	14.8	2.87	4	6	0.473	0.473	1
FARP2	1194	7314	73	8435	11	62	0.1	-0.54	0.58	0.475	15.07	14.02	1.09	5	6	0.00496	0.475	1
EXOSC10	1508	7401	9	8900	2	7	0.08	-0.16	0.16	0.476	22.22	16.92	1.4	1	1	0.464	0.476	1
ADORA1	1106	7802	5	8903	1	4	0.1	-0.1	0.1	0.476	20	12.41	1.76	1	0	0.19	0.476	1
SEC14L2	1639	7250	19	8870	4	15	0.07	-0.22	0.26	0.476	21.05	18.43	1.18	2	3	0.302	0.476	1
UPK1B	1549	7360	26	8883	5	21	0.08	-0.27	0.31	0.477	19.23	17.38	1.13	3	2	0.0225	0.477	1
ST14	1063	7657	29	8691	4	25	0.11	-0.32	0.37	0.477	13.79	12.19	1.15	3	3	0.0197	0.477	1
MAK	980	7875	12	8843	3	9	0.23	-0.11	0.34	0.132	25	11.05	2.68	1	1	0.478	0.478	1
LIMD1	1228	6970	12	8186	2	10	0.1	-0.19	0.19	0.478	16.67	14.98	1.14	1	0	0.13	0.478	1
TRPC6	994	5615	30	6579	5	25	0.12	-0.41	0.47	0.478	16.67	15.03	1.13	4	4	0.01	0.478	1
FNDC7	1380	7526	34	8872	13	21	0.69	0.26	0.99	0.00137	38.24	15.41	3.38	4	5	0.479	0.479	1
CARD16	1563	7048	14	8597	3	11	0.08	-0.2	0.23	0.479	21.43	18.15	1.23	2	0	0.00985	0.479	1
IFIT3	959	6008	12	6955	2	10	0.12	-0.24	0.24	0.479	16.67	13.76	1.25	2	3	0.239	0.479	1
GPT	990	7772	31	8731	11	20	0.8	0.4	1.14	0.00063	35.48	11.21	4.32	6	9	0.48	0.48	1
TRAK1	1920	6609	7	8523	3	3	0.13	-0.03	0.2	0.139	42.86	22.49	3.44	2	1	0.481	0.481	1
GDPD4	1206	7702	14	8894	3	11	0.1	-0.19	0.29	0.295	21.43	13.53	1.74	2	4	0.481	0.481	1
TMEM41A	930	6495	6	7419	3	3	0.25	0	0.37	0.0307	50	12.49	6.98	2	1	0.481	0.481	1
KIF1B	1817	6025	66	7776	16	50	0.07	-0.47	0.5	0.481	24.24	23.16	1.06	10	14	0.00847	0.481	1
KCTD17	1762	7139	13	8888	3	10	0.07	-0.18	0.21	0.482	23.08	19.79	1.22	2	3	0.38	0.482	1
CRYBB3	1336	7461	21	8776	4	17	0.09	-0.26	0.31	0.424	19.05	15.18	1.31	2	5	0.483	0.483	1
EZH1	1242	6789	16	8015	3	13	0.1	-0.29	0.29	0.483	18.75	15.46	1.26	3	1	0.00452	0.483	1
ALDH3B2	1180	7721	49	8853	7	41	0.1	-0.44	0.49	0.483	14.29	13.25	1.12	3	11	0.382	0.483	1
SLCO4C1	1270	7447	12	8706	2	9	0.09	-0.18	0.18	0.484	16.67	14.56	1.3	2	1	0.0607	0.484	1
FSTL4	1303	7144	10	8437	2	8	0.09	-0.18	0.18	0.484	20	15.42	1.37	1	0	0.158	0.484	1
GPR137B	1099	5281	9	6371	2	7	0.11	-0.22	0.22	0.485	22.22	17.22	1.37	2	1	0.0923	0.485	1
COL9A2	952	7846	53	8746	6	46	0.12	-0.47	0.53	0.486	11.32	10.82	1.07	4	10	0.0486	0.486	1
ADAMTS18	2029	6842	40	8834	9	28	0.06	-0.29	0.32	0.487	22.5	22.87	1.08	2	4	0.475	0.487	1
WDR59	1258	7296	15	8539	4	11	0.19	-0.14	0.37	0.2	26.67	14.69	2.11	1	1	0.487	0.487	1
PSG9	898	7304	15	8187	4	11	0.25	0	0.5	0.0764	26.67	10.92	2.96	1	1	0.487	0.487	1
MOCOS	1262	7645	47	8861	7	39	0.09	-0.42	0.46	0.487	14.89	14.16	1.09	5	3	0.000229	0.487	1
PLOD1	1332	6841	55	8119	9	45	0.09	-0.45	0.49	0.487	16.36	16.3	1.03	7	13	0.00929	0.487	1
CNTNAP3	912	5657	23	6546	4	19	0.13	-0.32	0.51	0.386	17.39	13.87	1.31	1	2	0.487	0.487	1
HPS4	1504	7386	27	8864	5	21	0.08	-0.28	0.32	0.488	18.52	16.91	1.17	4	3	0.00733	0.488	1
FAT4	2046	6863	55	8855	13	41	0.06	-0.38	0.38	0.489	23.64	22.96	1.06	7	11	0.0603	0.489	1
RP1	908	7145	45	8009	7	37	0.25	-0.31	0.74	0.224	15.56	11.25	1.49	2	7	0.489	0.489	1
ABCA1	1968	6934	138	8767	31	104	0.07	-0.62	0.62	0.489	22.46	22.09	1.05	17	13	5.86e-08	0.489	1
TOM1	1010	7812	5	8817	1	4	0.11	-0.11	0.11	0.49	20	11.44	1.93	1	0	0.19	0.49	1
SLC2A8	1790	6836	26	8600	6	20	0.07	-0.28	0.28	0.491	23.08	20.74	1.15	3	7	0.484	0.491	1
PDE6A	914	5533	90	6358	13	76	0.13	-0.83	0.83	0.491	14.44	14.17	1.04	7	14	0.00828	0.491	1
NES	1038	7852	24	8866	4	20	0.11	-0.22	0.44	0.307	16.67	11.66	1.51	2	6	0.491	0.491	1
WSCD1	1720	7173	18	8875	4	14	0.07	-0.22	0.22	0.491	22.22	19.34	1.19	4	0	6.01e-06	0.491	1
TSTA3	1319	7589	45	8864	7	37	0.09	-0.4	0.44	0.492	15.56	14.8	1.09	7	9	0.000381	0.492	1
PCK2	2277	6631	42	8866	11	31	0.06	-0.29	0.32	0.492	26.19	25.56	1.03	3	4	0.232	0.492	1
RGS3	1208	5515	15	6708	3	12	0.1	-0.3	0.3	0.492	20	17.96	1.14	2	2	0.169	0.492	1
CDK5RAP2	1534	7375	18	8891	5	13	0.16	-0.12	0.39	0.169	27.78	17.2	1.85	1	1	0.493	0.493	1
CILP	936	7972	18	8890	3	15	0.12	-0.18	0.36	0.269	16.67	10.49	1.7	1	2	0.493	0.493	1
MED12L	1563	7346	9	8900	2	7	0.08	-0.16	0.16	0.494	22.22	17.54	1.34	1	0	0.176	0.494	1
AGAP1	1137	7573	14	8697	2	11	0.1	-0.2	0.2	0.494	14.29	13.05	1.21	2	0	0.00506	0.494	1
NARS	1201	7706	34	8873	5	29	0.1	-0.38	0.38	0.494	14.71	13.48	1.11	3	3	0.0242	0.494	1
SELE	929	7172	7	8095	1	5	0.12	-0.12	0.12	0.494	14.29	11.46	1.54	1	1	0.438	0.494	1
SLC12A9	1903	7000	59	8845	20	38	0.53	0.1	0.9	0.0137	33.9	21.29	1.94	5	8	0.496	0.496	1
SLC22A16	1164	5892	22	7034	4	18	0.1	-0.31	0.31	0.497	18.18	16.49	1.12	2	4	0.339	0.497	1
FGFR2	1124	7757	27	8854	4	23	0.1	-0.31	0.36	0.482	14.81	12.65	1.2	2	7	0.497	0.497	1
SYT5	1844	7062	11	8895	4	7	0.14	-0.07	0.27	0.163	36.36	20.69	2.19	2	2	0.497	0.497	1
LEPREL1	1176	7710	27	8859	4	23	0.1	-0.34	0.34	0.497	14.81	13.23	1.14	2	7	0.497	0.497	1
DSC1	1074	7204	26	8252	4	22	0.11	-0.37	0.37	0.498	15.38	12.97	1.22	3	3	0.0277	0.498	1
EHD2	1147	7624	13	8758	2	11	0.1	-0.2	0.2	0.498	15.38	13.07	1.21	2	2	0.112	0.498	1
SEC14L3	1760	6736	18	8478	4	14	0.07	-0.21	0.21	0.499	22.22	20.71	1.09	1	1	0.41	0.499	1
PSMD13	2188	6711	6	8893	2	4	0.06	-0.12	0.12	0.448	33.33	24.58	1.53	2	2	0.5	0.5	1
NRD1	1193	7182	10	8365	2	8	0.1	-0.2	0.2	0.387	20	14.24	1.51	2	4	0.5	0.5	1
SLC30A5	1275	6639	6	7908	2	4	0.09	-0.09	0.19	0.253	33.33	16.1	2.6	2	2	0.5	0.5	1
KNG1	1401	7096	10	8487	2	8	0	-0.17	0.17	0.501	20	16.48	1.27	1	1	0.421	0.501	1
NAGA	1483	7414	48	8850	8	39	0	-0.4	0.4	0.501	16.67	16.67	1.03	6	4	0.000126	0.501	1
PHF7	1080	7810	14	8876	2	12	0	-0.21	0.21	0.501	14.29	12.15	1.21	1	0	0.111	0.501	1
SLC25A34	1296	7452	31	8717	5	26	0	-0.36	0.36	0.501	16.13	14.81	1.11	4	3	0.0034	0.501	1
DPYSL2	1233	7674	20	8887	7	13	0.38	0.09	0.66	0.013	35	13.8	3.35	3	4	0.502	0.502	1
SCN4B	1591	7315	20	8886	7	13	0.23	-0.04	0.46	0.0645	35	17.83	2.48	3	4	0.502	0.502	1
GLI1	1052	7856	14	8894	2	12	0	-0.22	0.22	0.502	14.29	11.81	1.24	2	3	0.178	0.502	1
ESYT1	971	7924	42	8853	5	37	0	-0.46	0.46	0.503	11.9	10.91	1.1	1	3	0.44	0.503	1
SERPINB2	1424	4905	26	6304	6	19	0	-0.36	0.36	0.503	23.08	22.49	1.09	2	4	0.491	0.503	1
ATP2A3	3181	5648	43	8787	23	19	0.39	0.07	0.69	0.0102	53.49	35.94	2.15	7	5	0.504	0.504	1
AGT	1717	7192	40	8870	8	31	0	-0.36	0.36	0.505	20	19.27	1.08	3	6	0.27	0.505	1
HADHB	1139	7769	45	8863	6	39	0	-0.45	0.4	0.505	13.33	12.78	1.05	2	6	0.318	0.505	1
CNDP1	1944	6963	11	8896	3	8	0.07	-0.16	0.2	0.465	27.27	21.82	1.34	2	3	0.506	0.506	1
PNP	1524	7017	20	8521	4	16	0	-0.24	0.24	0.508	20	17.84	1.15	3	2	0.0252	0.508	1
PLEKHH2	1174	7599	50	8723	7	43	0	-0.44	0.44	0.508	14	13.38	1.05	3	9	0.239	0.508	1
CPVL	1177	7731	27	8881	4	23	0	-0.34	0.29	0.508	14.81	13.21	1.14	4	1	7.25e-05	0.508	1
C17orf80	2052	6831	25	8859	6	18	0	-0.25	0.25	0.508	24	23.1	1.11	3	3	0.122	0.508	1
ADAL	911	5316	11	6216	2	9	0	-0.26	0.26	0.508	18.18	14.62	1.3	2	2	0.156	0.508	1
PTCH1	976	5232	120	6089	19	100	0	-0.91	0.91	0.509	15.83	15.72	1.02	12	23	0.000464	0.509	1
INVS	1296	7518	15	8800	4	10	0.18	-0.09	0.36	0.142	26.67	14.68	2.32	2	3	0.509	0.509	1
CAPN7	971	7020	14	7977	4	10	0.23	-0.06	0.47	0.102	28.57	12.12	2.89	2	3	0.509	0.509	1
ETNK2	1145	7631	5	8771	1	4	0.1	-0.1	0.1	0.485	20	13.04	1.67	1	1	0.51	0.51	1
SF3B1	1018	7081	5	8094	1	4	0.11	-0.11	0.11	0.487	20	12.56	1.74	1	1	0.51	0.51	1
FZD6	1018	7187	30	8175	4	26	0	-0.39	0.34	0.51	13.33	12.4	1.09	3	3	0.0178	0.51	1
OR8B2	902	7831	5	8728	1	4	0.12	-0.12	0.12	0.412	20	10.32	2.17	1	1	0.51	0.51	1
SDF4	865	7852	5	8712	1	4	0.13	-0.13	0.13	0.438	20	9.92	2.27	1	1	0.51	0.51	1
MPP2	925	7976	5	8896	1	4	0.12	-0.12	0.12	0.398	20	10.39	2.16	1	1	0.51	0.51	1
PSMC3	886	7855	5	8736	1	4	0.13	-0.13	0.13	0.418	20	10.13	2.22	1	1	0.51	0.51	1
SLC1A2	982	7362	5	8339	1	4	0.12	-0.12	0.12	0.486	20	11.76	1.87	1	1	0.51	0.51	1
BCKDK	960	7947	6	8902	1	4	0.12	-0.12	0.12	0.423	16.67	10.77	2.07	1	1	0.51	0.51	1
TARDBP	973	7760	7	8726	1	6	0	-0.17	0.12	0.51	14.29	11.14	1.33	1	0	0.138	0.51	1
RRP36	1032	7847	7	8874	1	4	0.11	-0.11	0.11	0.432	14.29	11.62	1.9	1	1	0.51	0.51	1
DAPK3	938	7897	5	8830	1	4	0.12	-0.12	0.12	0.406	20	10.61	2.1	1	1	0.51	0.51	1
METTL4	1015	7889	5	8899	1	4	0.11	-0.11	0.11	0.444	20	11.39	1.94	1	1	0.51	0.51	1
CAPN2	1225	7683	95	8815	13	80	0	-0.62	0.62	0.51	13.68	13.75	1.02	6	16	0.0475	0.51	1
DMD	1134	7764	36	8862	5	31	0	-0.4	0.4	0.511	13.89	12.74	1.1	4	2	0.000491	0.511	1
NPC2	1375	6989	10	8354	2	8	0	-0.17	0.17	0.511	20	16.44	1.27	1	0	0.158	0.511	1
TSC1	973	4614	81	5508	14	65	0	-0.81	0.81	0.511	17.28	17.41	1.02	8	15	0.0118	0.511	1
PCSK7	1531	7377	17	8891	5	12	0.16	-0.08	0.39	0.136	29.41	17.16	2.01	2	3	0.511	0.511	1
SIGLEC12	1711	7179	17	8873	5	12	0.14	-0.14	0.33	0.23	29.41	19.23	1.75	2	3	0.511	0.511	1
OR51I2	2095	6813	7	8901	2	5	0	-0.12	0.12	0.511	28.57	23.51	1.3	1	0	0.23	0.511	1
CELA1	1414	7493	17	8890	5	12	0.17	-0.08	0.42	0.113	29.41	15.85	2.21	2	3	0.511	0.511	1
EVPL	2041	6807	29	8819	7	22	0	-0.29	0.29	0.511	24.14	23.06	1.06	3	5	0.295	0.511	1
ADCY3	956	7575	17	8516	2	13	0	-0.24	0.24	0.512	11.76	11.2	1.22	1	1	0.288	0.512	1
ADAM12	2002	6905	21	8887	6	14	0.13	-0.16	0.32	0.288	28.57	22.46	1.48	2	3	0.513	0.513	1
TUBAL3	1010	7899	75	8834	9	66	0	-0.61	0.56	0.513	12	11.33	1.07	6	10	0.00175	0.513	1
CES1	1574	7321	27	8868	5	22	0	-0.31	0.31	0.514	18.52	17.69	1.06	3	4	0.0936	0.514	1
RPS6KA2	1786	7119	8	8897	2	6	0.07	-0.14	0.14	0.489	25	20.05	1.33	1	1	0.515	0.515	1
DNAJB13	1432	6777	8	8201	2	6	0.08	-0.17	0.17	0.423	25	17.44	1.58	1	1	0.515	0.515	1
PLEKHO2	1021	7844	8	8857	2	6	0.11	-0.11	0.22	0.267	25	11.51	2.56	1	1	0.515	0.515	1
EPHB6	901	6164	17	7048	4	13	0.25	-0.13	0.51	0.187	23.53	12.73	2.11	2	4	0.515	0.515	1
HMMR	1504	7330	11	8824	2	8	0	-0.16	0.16	0.515	18.18	17.02	1.22	1	1	0.421	0.515	1
HTR3B	1057	6754	17	7794	4	13	0.22	-0.16	0.44	0.2	23.53	13.51	1.97	2	4	0.515	0.515	1
UTP14C	1225	6863	9	8080	2	6	0.1	-0.14	0.19	0.386	22.22	15.14	1.87	1	1	0.515	0.515	1
C1orf174	1512	7395	8	8899	2	6	0.08	-0.16	0.16	0.397	25	16.97	1.63	1	1	0.515	0.515	1
PLEKHG7	1094	7800	8	8886	2	6	0.1	-0.1	0.21	0.206	25	12.29	2.38	1	1	0.515	0.515	1
KCNH8	1107	7407	91	8424	12	78	0	-0.67	0.62	0.516	13.19	13	1.03	8	22	0.0131	0.516	1
SLC27A6	1039	6890	13	7916	2	11	0	-0.22	0.22	0.516	15.38	13.1	1.21	2	1	0.043	0.516	1
MTMR3	1270	7045	63	8253	10	52	0	-0.51	0.51	0.517	15.87	15.27	1.07	5	11	0.0686	0.517	1
FANCA	2341	5806	67	8083	19	45	0	-0.42	0.42	0.517	28.36	28.73	1.05	11	9	0.000751	0.517	1
MCC	1716	7193	26	8883	5	21	0	-0.29	0.29	0.517	19.23	19.26	1	2	4	0.356	0.517	1
MYLK4	1392	7507	11	8888	3	8	0.09	-0.09	0.26	0.228	27.27	15.63	2.02	1	1	0.518	0.518	1
PRDM15	1654	7251	11	8894	3	8	0.07	-0.15	0.22	0.346	27.27	18.56	1.64	1	1	0.518	0.518	1
GLRA3	1357	7552	11	8898	2	9	0	-0.17	0.17	0.518	18.18	15.23	1.24	2	0	0.00725	0.518	1
LIMCH1	1290	7593	11	8872	3	8	0.18	-0.09	0.27	0.214	27.27	14.51	2.21	1	1	0.518	0.518	1
OR7C1	1704	7203	5	8902	3	2	0.15	0	0.22	0.0495	60	19.11	6.34	1	0	0.518	0.518	1
CNDP2	1545	7336	14	8867	4	10	0.16	-0.12	0.31	0.228	28.57	17.38	1.9	1	1	0.52	0.52	1
EGFR	1219	7690	36	8874	5	30	0	-0.38	0.38	0.52	13.89	13.68	1.05	2	5	0.289	0.52	1
ESR1	1157	7748	29	8877	4	24	0	-0.35	0.3	0.52	13.79	12.99	1.12	2	5	0.304	0.52	1
OAS2	1100	7301	13	8388	2	11	0	-0.21	0.21	0.52	15.38	13.09	1.21	1	0	0.12	0.52	1
MEFV	1418	7474	14	8878	4	10	0.17	-0.08	0.34	0.155	28.57	15.93	2.11	1	1	0.52	0.52	1
OR11H6	1534	7362	14	8882	4	10	0.16	-0.08	0.32	0.192	28.57	17.23	1.92	1	1	0.52	0.52	1
ABCB5	1465	7433	135	8766	22	110	0	-0.69	0.69	0.52	16.3	16.46	1.01	6	15	0.0909	0.52	1
COL9A1	1854	6868	88	8634	19	69	0	-0.51	0.51	0.521	21.59	21.25	1.02	8	12	0.0169	0.521	1
DNMBP	1502	6360	14	7848	3	11	0	-0.25	0.25	0.522	21.43	19.1	1.15	1	1	0.414	0.522	1
UNC45B	1810	6802	20	8592	6	14	0.14	-0.14	0.35	0.237	30	21	1.61	1	1	0.522	0.522	1
GPR87	1098	7628	6	8720	1	5	0	-0.16	0.1	0.523	16.67	12.58	1.39	1	0	0.16	0.523	1
SP100	1577	7180	20	8737	4	16	0	-0.27	0.23	0.523	20	18	1.14	1	1	0.37	0.523	1
CRTAC1	930	5411	18	6323	3	15	0	-0.38	0.38	0.523	16.67	14.66	1.16	3	6	0.186	0.523	1
AOX1	1397	7512	25	8885	4	20	0	-0.3	0.25	0.523	16	15.68	1.08	3	3	0.0355	0.523	1
NME5	1025	7883	6	8902	1	5	0	-0.17	0.11	0.524	16.67	11.5	1.54	1	0	0.16	0.524	1
LSG1	1448	7218	21	8645	4	17	0.08	-0.25	0.29	0.468	19.05	16.7	1.17	1	2	0.527	0.527	1
SLC35D2	957	6395	21	7331	3	18	0	-0.36	0.36	0.527	14.29	13.01	1.11	2	3	0.157	0.527	1
ATP2B2	1970	6852	59	8764	13	45	0	-0.42	0.39	0.528	22.03	22.33	1	5	5	0.0193	0.528	1
KALRN	1998	6911	12	8897	3	9	0	-0.19	0.19	0.529	25	22.42	1.15	3	3	0.126	0.529	1
CRYZ	1017	7876	6	8887	1	5	0	-0.17	0.11	0.529	16.67	11.43	1.55	1	1	0.438	0.529	1
VWA2	2018	6891	32	8879	7	23	0	-0.29	0.29	0.53	21.88	22.65	1.04	4	4	0.0455	0.53	1
ADAMTS17	1792	7116	25	8884	5	19	0	-0.28	0.28	0.53	20	20.11	1.04	3	4	0.132	0.53	1
ZNF577	928	5504	14	6419	5	8	0.38	0	0.63	0.0346	35.71	14.38	3.71	2	2	0.531	0.531	1
LGR6	1354	7083	17	8420	3	14	0	-0.26	0.26	0.531	17.65	16.05	1.12	3	2	0.0162	0.531	1
PTPRZ1	1236	7655	27	8864	4	23	0	-0.33	0.28	0.531	14.81	13.9	1.08	2	4	0.237	0.531	1
P2RX5	3633	5275	11	8897	5	6	0	-0.14	0.16	0.532	45.45	40.78	1.21	5	1	0.00223	0.532	1
OR2D2	1717	7191	9	8899	2	7	0	-0.14	0.14	0.532	22.22	19.27	1.2	1	0	0.176	0.532	1
B3GALTL	1769	7136	9	8896	2	7	0	-0.14	0.14	0.533	22.22	19.86	1.15	2	1	0.0923	0.533	1
STRN4	1234	7289	25	8498	5	20	0.09	-0.24	0.38	0.31	20	14.46	1.48	1	2	0.533	0.533	1
CTAGE5	1234	7667	18	8883	3	15	0	-0.28	0.28	0.534	16.67	13.86	1.24	2	4	0.315	0.534	1
TIE1	1258	7645	35	8869	5	29	0	-0.37	0.37	0.534	14.29	14.13	1.05	5	4	0.000399	0.534	1
TMPRSS11A	1035	7874	41	8868	5	36	0	-0.44	0.44	0.535	12.2	11.61	1.06	4	6	0.0106	0.535	1
DCC	1989	6918	13	8895	8	4	0.32	0.13	0.52	0.00155	61.54	22.27	6.96	3	1	0.537	0.537	1
ANGPT2	1573	6792	28	8338	7	20	0.16	-0.2	0.39	0.282	25	18.78	1.51	2	4	0.538	0.538	1
NOX3	1382	7366	62	8687	10	51	0	-0.47	0.47	0.538	16.13	15.79	1.05	6	13	0.0409	0.538	1
STARD13	1538	6773	9	8302	2	7	0	-0.16	0.16	0.538	22.22	18.5	1.26	2	2	0.232	0.538	1
HELB	1129	7755	12	8872	2	10	0	-0.2	0.2	0.502	16.67	12.7	1.37	1	2	0.539	0.539	1
PAFAH2	944	7635	12	8567	2	10	0.12	-0.24	0.24	0.369	16.67	11	1.62	1	2	0.539	0.539	1
HSD17B3	1346	7506	26	8827	4	21	0	-0.31	0.26	0.539	15.38	15.2	1.06	1	2	0.453	0.539	1
C9orf152	949	7906	14	8842	3	10	0.24	-0.12	0.35	0.161	21.43	10.7	2.5	2	4	0.54	0.54	1
KRT28	1446	7460	74	8832	12	62	0	-0.54	0.5	0.54	16.22	16.24	1	4	15	0.402	0.54	1
TSTD2	1071	7658	15	8714	2	13	0	-0.27	0.21	0.541	13.33	12.27	1.1	2	2	0.0843	0.541	1
DCHS1	2360	6549	27	8883	7	19	0	-0.26	0.23	0.542	25.93	26.49	1.02	4	1	0.00173	0.542	1
MYH7	1447	7199	110	8537	18	91	0	-0.62	0.58	0.542	16.36	16.74	0.98	13	19	1.28e-05	0.542	1
GRN	1873	7022	14	8881	3	11	0	-0.2	0.2	0.543	21.43	21.06	1.02	3	1	0.00708	0.543	1
CNTNAP1	1723	7179	40	8863	9	30	0.07	-0.29	0.43	0.364	22.5	19.34	1.25	4	11	0.543	0.543	1
SLC12A7	1097	7722	66	8753	15	51	0.73	0.1	1.2	0.014	22.73	12.36	2.07	5	15	0.543	0.543	1
ZNF230	1220	7686	5	8901	1	4	0	-0.14	0.09	0.544	20	13.7	1.57	1	0	0.19	0.544	1
ZNF607	961	7944	26	8879	3	23	0	-0.35	0.35	0.545	11.54	10.79	1.08	2	5	0.227	0.545	1
NMI	913	6893	15	7791	2	13	0	-0.31	0.25	0.545	13.33	11.69	1.16	2	2	0.0843	0.545	1
TAS1R1	1310	7599	61	8848	9	52	0	-0.49	0.45	0.545	14.75	14.7	1	5	12	0.0627	0.545	1
GPR155	1060	7607	6	8661	1	5	0	-0.16	0.11	0.545	16.67	12.23	1.44	1	0	0.16	0.545	1
ZFHX3	1720	7187	88	8819	17	71	0	-0.54	0.5	0.545	19.32	19.31	1	10	10	6.14e-05	0.545	1
MPZL2	1690	6905	32	8565	6	24	0	-0.33	0.29	0.546	18.75	19.66	1.02	3	3	0.062	0.546	1
SEC23A	1236	7633	27	8842	4	23	0	-0.33	0.28	0.546	14.81	13.93	1.07	2	4	0.237	0.546	1
NUDT12	1041	7440	6	8475	1	5	0	-0.16	0.11	0.547	16.67	12.27	1.43	1	1	0.438	0.547	1
CDH7	1151	7750	6	8895	1	5	0	-0.15	0.1	0.548	16.67	12.93	1.35	1	1	0.438	0.548	1
PANK1	1180	7606	21	8765	3	18	0	-0.29	0.29	0.548	14.29	13.43	1.07	2	3	0.157	0.548	1
ALS2CR12	1078	7146	20	8204	4	16	0.11	-0.21	0.43	0.269	20	13.09	1.66	1	2	0.549	0.549	1
FARSA	1175	7723	16	8884	2	12	0	-0.25	0.2	0.549	12.5	13.2	1.1	1	2	0.473	0.549	1
PIBF1	1351	6920	11	8260	2	9	0	-0.22	0.18	0.549	18.18	16.33	1.14	2	3	0.282	0.549	1
CREB3L4	1027	6247	20	7254	3	17	0	-0.34	0.34	0.55	15	14.12	1.07	2	3	0.172	0.55	1
APOL5	1092	6873	5	7960	1	4	0	-0.16	0.11	0.55	20	13.71	1.57	1	0	0.19	0.55	1
DCPS	1674	7033	20	8687	4	16	0	-0.26	0.22	0.551	20	19.22	1.05	3	2	0.0252	0.551	1
THYN1	916	4990	20	5886	3	17	0	-0.39	0.39	0.553	15	15.51	0.96	3	1	0.00217	0.553	1
RLN1	907	6628	15	7520	2	13	0	-0.31	0.25	0.553	13.33	12.03	1.12	2	3	0.156	0.553	1
ATP5A1	1130	6532	27	7636	4	22	0	-0.42	0.31	0.553	14.81	14.75	1.05	4	6	0.0247	0.553	1
NR3C2	1117	7787	29	8876	6	22	0.31	-0.1	0.56	0.129	20.69	12.52	1.9	1	2	0.553	0.553	1
TUFM	1256	7624	13	8867	2	11	0	-0.23	0.19	0.554	15.38	14.14	1.1	1	1	0.33	0.554	1
CD27	1561	7347	22	8886	4	18	0	-0.27	0.23	0.554	18.18	17.52	1.05	2	5	0.45	0.554	1
NUAK2	1481	7428	11	8898	2	9	0	-0.2	0.16	0.554	18.18	16.62	1.11	1	1	0.386	0.554	1
IFT172	1169	6599	51	7719	10	39	0.3	-0.25	0.7	0.193	19.61	15.01	1.45	2	6	0.554	0.554	1
OR10K2	1277	7111	5	8383	1	4	0	-0.14	0.09	0.554	20	15.22	1.39	1	1	0.51	0.554	1
KLK3	1266	7605	21	8851	3	17	0	-0.28	0.28	0.555	14.29	14.27	1.06	1	2	0.45	0.555	1
ARSA	952	7443	36	8360	6	29	0.24	-0.3	0.59	0.275	16.67	11.32	1.62	2	7	0.555	0.555	1
CDC42BPA	1821	7088	14	8895	3	11	0	-0.21	0.21	0.555	21.43	20.44	1.06	1	1	0.414	0.555	1
TMEM42	2354	6555	13	8896	4	9	0.06	-0.17	0.17	0.491	30.77	26.42	1.24	1	1	0.556	0.556	1
FAHD1	951	7792	7	8736	1	6	0	-0.24	0.12	0.556	14.29	10.87	1.37	1	1	0.383	0.556	1
MS4A7	1400	7509	14	8896	4	9	0.17	-0.08	0.34	0.116	28.57	15.69	2.38	1	1	0.556	0.556	1
LIPC	1176	7732	56	8853	10	45	0.29	-0.24	0.69	0.175	17.86	13.17	1.46	2	7	0.556	0.556	1
SLC4A11	1675	7230	54	8851	10	44	0	-0.44	0.37	0.556	18.52	18.81	0.98	10	5	7.27e-09	0.556	1
LAMC3	2246	6598	23	8821	6	17	0	-0.24	0.24	0.556	26.09	25.39	1.04	3	5	0.366	0.556	1
ELSPBP1	1612	7294	22	8885	4	17	0	-0.27	0.23	0.557	18.18	18.1	1.06	2	1	0.0586	0.557	1
TRAK2	999	7907	7	8899	1	6	0	-0.23	0.11	0.557	14.29	11.21	1.32	1	0	0.138	0.557	1
PCDHA6	1652	7256	10	8898	2	8	0	-0.19	0.15	0.557	20	18.54	1.1	1	1	0.421	0.557	1
DTNA	919	5968	6	6882	1	4	0	-0.19	0.13	0.557	16.67	13.34	1.62	1	1	0.51	0.557	1
OR51A7	1747	7162	9	8900	2	7	0	-0.14	0.14	0.558	22.22	19.61	1.17	1	1	0.464	0.558	1
ZACN	1968	6938	31	8875	7	24	0	-0.29	0.26	0.558	22.58	22.1	1.03	3	1	0.00962	0.558	1
TCTN2	1392	7513	34	8872	5	28	0	-0.34	0.34	0.558	14.71	15.63	0.96	4	5	0.014	0.558	1
HMGCR	981	5682	26	6637	4	22	0	-0.48	0.36	0.559	15.38	14.72	1.05	3	3	0.0277	0.559	1
MAN2A2	1781	7126	42	8865	11	31	0.21	-0.21	0.49	0.223	26.19	19.97	1.42	3	7	0.559	0.559	1
TSPAN4	1753	7099	9	8843	2	7	0	-0.14	0.14	0.559	22.22	19.8	1.16	1	1	0.464	0.559	1
CSF3R	1560	7339	10	8889	2	8	0	-0.19	0.16	0.56	20	17.53	1.18	2	2	0.189	0.56	1
DHPS	906	6305	22	7189	3	19	0	-0.38	0.38	0.56	13.64	12.56	1.1	1	1	0.268	0.56	1
AGL	1632	6905	111	8426	21	90	0	-0.64	0.57	0.561	18.92	19.12	0.99	13	14	5.05e-06	0.561	1
PRSS50	2174	6480	25	8630	6	18	0	-0.25	0.25	0.561	24	25.12	0.99	4	3	0.0251	0.561	1
IFNA21	1162	6409	6	7566	1	4	0	-0.15	0.1	0.561	16.67	15.34	1.38	1	0	0.19	0.561	1
OR51B5	2291	6618	7	8902	2	5	0	-0.12	0.12	0.562	28.57	25.71	1.16	1	0	0.23	0.562	1
GRM7	1751	7093	38	8807	7	30	0	-0.36	0.28	0.562	18.42	19.8	0.95	6	6	0.0016	0.562	1
SLC4A1	1226	6383	44	7565	7	37	0	-0.49	0.44	0.562	15.91	16.11	0.98	5	7	0.00982	0.562	1
APEX1	1634	7145	27	8752	5	22	0	-0.3	0.3	0.562	18.52	18.61	0.99	2	3	0.229	0.562	1
DMKN	1338	7556	5	8889	1	4	0	-0.13	0.09	0.562	20	15.04	1.41	1	1	0.51	0.562	1
PHLDB2	1080	7829	16	8894	2	13	0	-0.26	0.21	0.563	12.5	12.12	1.12	2	1	0.032	0.563	1
DDO	995	5566	12	6549	2	10	0	-0.3	0.24	0.563	16.67	15.16	1.12	2	1	0.0507	0.563	1
C3orf62	1165	7106	10	8261	3	7	0.2	-0.1	0.3	0.162	30	14.07	2.61	1	1	0.564	0.564	1
NPR1	926	7364	10	8280	3	7	0.24	0	0.36	0.0813	30	11.15	3.41	1	1	0.564	0.564	1
GPATCH1	1354	5508	10	6852	3	7	0.09	-0.18	0.28	0.31	30	19.72	1.74	1	1	0.564	0.564	1
ARHGEF18	969	6913	15	7867	3	12	0.12	-0.18	0.35	0.278	20	12.28	1.78	2	5	0.564	0.564	1
TMEM128	1454	7455	11	8899	3	7	0.16	-0.08	0.25	0.186	27.27	16.31	2.2	1	1	0.564	0.564	1
ZNF528	908	7972	10	8870	3	7	0.25	0	0.37	0.0741	30	10.2	3.76	1	1	0.564	0.564	1
SLC1A1	1647	6782	10	8419	3	7	0.08	-0.15	0.23	0.343	30	19.53	1.76	1	1	0.564	0.564	1
MANBA	1235	7660	65	8830	9	56	0	-0.56	0.47	0.565	13.85	13.88	1	5	10	0.0235	0.565	1
OR52N2	1179	7707	14	8872	2	12	0	-0.24	0.2	0.565	14.29	13.27	1.09	2	0	0.00432	0.565	1
DDX56	1152	7380	13	8519	2	11	0	-0.25	0.2	0.565	15.38	13.5	1.16	1	0	0.12	0.565	1
NOD2	1003	6826	34	7796	5	28	0.11	-0.34	0.46	0.42	14.71	12.8	1.22	2	8	0.565	0.565	1
ATP2A1	1278	7629	93	8814	13	80	0	-0.64	0.55	0.566	13.98	14.35	0.97	8	10	0.000115	0.566	1
MTOR	1301	7608	13	8896	2	11	0	-0.23	0.18	0.566	15.38	14.6	1.06	2	1	0.043	0.566	1
KIAA0319	1619	7288	10	8897	2	8	0	-0.19	0.15	0.567	20	18.17	1.13	2	2	0.189	0.567	1
FITM1	1047	7861	7	8901	1	6	0	-0.22	0.11	0.567	14.29	11.75	1.25	1	1	0.383	0.567	1
PFKL	1227	7230	41	8416	6	35	0	-0.43	0.38	0.567	14.63	14.51	1.01	3	7	0.163	0.567	1
KANK1	2276	6629	34	8871	9	25	0	-0.3	0.3	0.568	26.47	25.56	1.05	5	4	0.0181	0.568	1
NKG7	1023	7881	7	8897	1	6	0	-0.22	0.11	0.568	14.29	11.49	1.28	1	1	0.383	0.568	1
FBXL6	952	6284	14	7222	2	12	0	-0.3	0.24	0.569	14.29	13.15	1.1	1	2	0.473	0.569	1
C1orf177	1197	7712	6	8903	1	5	0	-0.19	0.1	0.569	16.67	13.43	1.29	1	1	0.438	0.569	1
ATP10D	1290	7614	71	8834	10	60	0	-0.54	0.45	0.57	14.08	14.49	0.98	6	17	0.0643	0.57	1
PDSS1	960	7856	7	8809	1	6	0	-0.23	0.12	0.57	14.29	10.89	1.36	1	0	0.138	0.57	1
SYNE2	2101	6806	43	8864	12	31	0.12	-0.22	0.44	0.295	27.91	23.57	1.25	4	9	0.57	0.57	1
KIAA1217	1635	7215	11	8840	2	8	0	-0.19	0.15	0.571	18.18	18.47	1.1	1	1	0.421	0.571	1
CCDC146	970	7921	23	8868	5	18	0.35	-0.12	0.58	0.101	21.74	10.88	2.27	1	2	0.571	0.571	1
PBRM1	1680	5515	13	7182	4	9	0.08	-0.16	0.31	0.339	30.77	23.34	1.46	2	3	0.572	0.572	1
PRDM5	1100	6987	14	8073	2	12	0	-0.26	0.21	0.572	14.29	13.6	1.06	1	1	0.308	0.572	1
EXOSC3	1552	6890	16	8426	3	13	0	-0.24	0.24	0.572	18.75	18.38	1.02	2	1	0.0594	0.572	1
EIF2B1	1290	7618	23	8886	3	19	0	-0.27	0.27	0.573	13.04	14.48	0.93	2	1	0.0305	0.573	1
LRP5L	916	7108	64	7961	12	51	0.62	-0.06	1.11	0.0542	18.75	11.36	1.83	4	15	0.573	0.573	1
TRAP1	1145	7747	31	8861	4	27	0	-0.4	0.3	0.573	12.9	12.88	1	3	8	0.168	0.573	1
IGSF10	1083	7706	55	8735	11	43	0.53	-0.05	0.95	0.0591	20	12.27	1.82	3	10	0.573	0.573	1
KLK7	1029	7870	17	8884	3	12	0.22	-0.11	0.33	0.214	17.65	11.55	1.91	1	2	0.574	0.574	1
ADAM9	1139	7405	6	8538	1	5	0	-0.2	0.1	0.574	16.67	13.33	1.3	1	1	0.438	0.574	1
COL11A2	1032	7874	44	8863	5	38	0	-0.49	0.44	0.574	11.36	11.59	1	3	5	0.0402	0.574	1
PCDH15	2124	6785	27	8882	9	18	0.12	-0.12	0.4	0.201	33.33	23.81	1.6	2	3	0.575	0.575	1
MADD	1371	7537	12	8896	2	10	0	-0.22	0.17	0.576	16.67	15.39	1.1	1	1	0.356	0.576	1
LRIT3	946	7960	7	8899	1	6	0	-0.24	0.12	0.576	14.29	10.62	1.4	1	1	0.383	0.576	1
CACNA1S	1900	7008	279	8633	58	217	-0.07	-0.97	0.8	0.577	20.79	21.34	0.99	28	37	8.03e-08	0.577	1
LHX3	1104	5922	5	7021	1	4	0	-0.21	0.11	0.577	20	15.71	1.34	1	1	0.51	0.577	1
C1QTNF9	1395	7513	12	8896	2	10	0	-0.21	0.17	0.577	16.67	15.66	1.08	1	1	0.356	0.577	1
PRPF4	1032	5121	7	6146	2	5	0.12	-0.12	0.23	0.339	28.57	16.76	1.98	1	1	0.578	0.578	1
ASB8	1074	7504	7	8571	2	5	0.11	-0.11	0.21	0.218	28.57	12.51	2.79	1	1	0.578	0.578	1
C10orf53	1309	7597	7	8899	2	5	0.09	-0.09	0.18	0.266	28.57	14.69	2.32	1	1	0.578	0.578	1
SVIL	2243	6666	16	8893	4	12	0	-0.21	0.18	0.578	25	25.18	0.99	2	1	0.105	0.578	1
PCDHA13	1260	7636	8	8889	2	5	0.09	-0.09	0.18	0.268	25	14.15	2.42	1	1	0.578	0.578	1
CYP2E1	1109	7797	11	8895	2	9	0.1	-0.21	0.21	0.453	18.18	12.45	1.56	1	2	0.578	0.578	1
PIGZ	1409	7284	7	8686	2	5	0.08	-0.08	0.17	0.322	28.57	16.2	2.07	1	1	0.578	0.578	1
CD151	1347	7413	7	8753	2	5	0.09	-0.09	0.18	0.328	28.57	15.37	2.2	1	1	0.578	0.578	1
TRAIP	2077	6819	7	8889	2	5	0	-0.13	0.13	0.576	28.57	23.34	1.31	1	1	0.578	0.578	1
SETD6	1698	5970	7	7661	2	5	0.08	-0.15	0.15	0.49	28.57	22.14	1.41	1	1	0.578	0.578	1
CTSF	1054	7846	11	8889	2	9	0.11	-0.22	0.22	0.372	18.18	11.83	1.65	1	2	0.578	0.578	1
CCDC81	1302	7406	7	8701	2	5	0.09	-0.09	0.18	0.283	28.57	14.94	2.28	1	1	0.578	0.578	1
SPRR1A	948	6837	7	7778	2	5	0.12	-0.12	0.24	0.226	28.57	12.16	2.88	1	1	0.578	0.578	1
CHKB	1319	7198	7	8510	2	5	0.09	-0.09	0.18	0.289	28.57	15.48	2.18	1	1	0.578	0.578	1
GPR142	1530	7369	7	8892	2	5	0.08	-0.12	0.16	0.359	28.57	17.18	1.93	1	1	0.578	0.578	1
MIA2	915	7921	16	8821	2	13	0.12	-0.24	0.24	0.443	12.5	10.35	1.33	1	3	0.578	0.578	1
IL20	943	7778	20	8701	3	17	0.12	-0.24	0.36	0.345	15	10.8	1.46	1	3	0.579	0.579	1
UMOD	1093	7695	41	8748	5	35	0	-0.47	0.42	0.58	12.2	12.44	1.01	3	14	0.461	0.58	1
FOXN4	1060	7790	33	8817	4	29	0	-0.43	0.32	0.581	12.12	11.98	1.01	2	8	0.437	0.581	1
JAK2	1337	5986	51	7273	9	41	0	-0.55	0.46	0.581	17.65	18.26	0.98	5	8	0.0344	0.581	1
NT5DC2	2388	6501	7	8882	2	5	0	-0.11	0.11	0.581	28.57	26.86	1.09	2	1	0.156	0.581	1
CLCNKA	1623	6428	45	8006	9	36	0	-0.42	0.39	0.582	20	20.16	0.99	5	7	0.0346	0.582	1
FSCN3	1068	7760	16	8812	2	14	0	-0.32	0.21	0.582	12.5	12.1	1.04	1	1	0.271	0.582	1
DISC1	1041	6923	14	7950	2	12	0	-0.33	0.22	0.583	14.29	13.07	1.11	2	2	0.0967	0.583	1
ITGAE	3374	5534	56	8852	21	35	0	-0.36	0.31	0.584	37.5	37.88	0.98	10	6	0.00283	0.584	1
ROR2	1469	7430	31	8868	5	26	0	-0.37	0.29	0.584	16.13	16.51	0.97	2	2	0.1	0.584	1
COL27A1	2833	6076	149	8762	46	101	-0.05	-0.6	0.54	0.585	30.87	31.81	0.98	24	26	0.000207	0.585	1
BARD1	1178	7696	22	8852	3	19	0	-0.34	0.29	0.585	13.64	13.27	1.03	2	0	0.00363	0.585	1
KLK9	1169	7668	22	8815	3	19	0	-0.35	0.3	0.586	13.64	13.23	1.04	2	3	0.144	0.586	1
UTRN	2237	6303	60	8481	15	44	0	-0.42	0.36	0.586	25	26.2	0.96	4	10	0.533	0.586	1
PAX4	1068	7761	60	8769	7	53	0	-0.59	0.43	0.586	11.67	12.1	0.96	4	10	0.0513	0.586	1
GEN1	1061	7846	16	8891	2	14	0	-0.32	0.21	0.587	12.5	11.91	1.06	2	6	0.401	0.587	1
HDAC4	951	7891	7	8835	1	6	0	-0.24	0.12	0.564	14.29	10.75	1.38	1	2	0.587	0.587	1
GBP1	1311	7408	35	8685	5	29	0	-0.4	0.31	0.587	14.29	15.04	0.97	5	5	0.00105	0.587	1
SH2D4A	1513	6233	35	7712	7	27	0	-0.41	0.33	0.569	20	19.53	1.07	2	6	0.587	0.587	1
IL5RA	1536	7373	23	8886	4	19	0	-0.31	0.24	0.588	17.39	17.24	1.01	2	5	0.42	0.588	1
BZRAP1	2082	6789	10	8861	3	7	0.06	-0.13	0.19	0.43	30	23.46	1.4	2	3	0.588	0.588	1
SLC11A1	1300	7608	63	8846	9	53	0	-0.54	0.45	0.588	14.29	14.59	0.99	6	6	0.000414	0.588	1
IRF9	1340	7567	33	8874	5	28	0	-0.4	0.31	0.589	15.15	15.04	1.01	3	5	0.0866	0.589	1
KRT6B	1157	7017	58	8118	8	48	0	-0.55	0.45	0.59	13.79	14.15	1.01	4	5	0.0125	0.59	1
VSX2	1262	7645	21	8886	7	14	0.37	0.05	0.65	0.0211	33.33	14.12	3.03	2	3	0.59	0.59	1
ANKS3	1138	7401	6	8533	1	5	0	-0.2	0.1	0.591	16.67	13.32	1.3	1	0	0.16	0.591	1
FUCA1	1545	7363	17	8891	3	14	0	-0.23	0.23	0.591	17.65	17.34	1.02	1	0	0.127	0.591	1
SMCR8	2788	6083	10	8861	3	7	0	-0.16	0.16	0.592	30	31.43	0.94	1	1	0.564	0.592	1
GJA9	1264	7254	60	8462	8	48	0	-0.51	0.42	0.592	13.33	14.84	0.96	5	7	0.00616	0.592	1
FN3K	1218	7686	6	8898	1	5	0	-0.19	0.1	0.592	16.67	13.68	1.26	1	1	0.438	0.592	1
ENTPD7	1081	7685	7	8759	1	6	0	-0.21	0.11	0.592	14.29	12.33	1.18	1	1	0.383	0.592	1
RAP1GAP	1659	7160	21	8798	4	17	0	-0.3	0.22	0.592	19.05	18.81	1.02	3	5	0.171	0.592	1
NRXN3	1050	6751	38	7763	5	33	0	-0.5	0.39	0.593	13.16	13.46	0.97	2	6	0.323	0.593	1
KRT85	1474	7197	32	8640	5	26	0	-0.37	0.29	0.593	15.62	17	0.94	2	2	0.1	0.593	1
SLC5A4	915	5908	62	6761	8	54	0	-0.76	0.57	0.593	12.9	13.42	0.96	6	9	0.00138	0.593	1
GABBR2	1858	7006	14	8851	4	9	0.07	-0.14	0.27	0.303	28.57	20.95	1.68	3	5	0.593	0.593	1
WNK1	1357	7551	20	8888	3	17	0	-0.3	0.26	0.594	15	15.23	0.98	3	1	0.00217	0.594	1
TNNT2	1961	6948	44	8866	9	34	0	-0.36	0.33	0.594	20.45	22.02	0.94	3	6	0.28	0.594	1
LENG9	1003	7644	8	8640	1	6	0	-0.23	0.11	0.594	12.5	11.6	1.27	1	0	0.138	0.594	1
PROZ	1620	7288	57	8851	10	47	0	-0.49	0.38	0.595	17.54	18.19	0.96	3	9	0.376	0.595	1
RARS2	1293	6096	17	7372	3	14	0	-0.28	0.28	0.595	17.65	17.5	1.01	2	2	0.132	0.595	1
CACNB3	948	7742	29	8661	3	26	0	-0.41	0.36	0.597	10.34	10.91	0.94	2	3	0.0842	0.597	1
SGOL1	1025	6807	6	7826	1	5	0	-0.22	0.11	0.597	16.67	13.08	1.33	1	1	0.438	0.597	1
KCNH1	1015	7615	73	8557	8	65	0	-0.67	0.5	0.598	10.96	11.77	0.92	4	12	0.0723	0.598	1
GIT1	1517	7355	7	8866	4	2	0.24	0.08	0.32	0.0114	57.14	17.07	9.7	1	0	0.598	0.598	1
C16orf46	1328	7578	6	8900	4	2	0.27	0.09	0.35	0.00484	66.67	14.88	11.41	1	0	0.598	0.598	1
CHRNE	1465	6394	33	7826	8	25	0.17	-0.25	0.5	0.279	24.24	18.62	1.4	2	5	0.598	0.598	1
TBX4	1143	6619	29	7734	4	24	0	-0.41	0.31	0.598	13.79	14.73	0.97	2	7	0.472	0.598	1
DYSF	1416	7493	207	8703	32	174	-0.08	-0.97	0.76	0.598	15.46	15.9	0.97	12	29	0.00563	0.598	1
ENPP2	1360	7549	19	8891	4	14	0.09	-0.17	0.35	0.297	21.05	15.25	1.59	1	2	0.598	0.598	1
T	970	6634	6	7598	4	2	0.35	0.12	0.47	0.00362	66.67	12.71	13.68	1	0	0.598	0.598	1
SLC25A38	1268	7554	33	8789	6	27	0.09	-0.28	0.46	0.353	18.18	14.36	1.32	2	7	0.598	0.598	1
VAV3	1403	7500	19	8884	3	16	0	-0.3	0.25	0.599	15.79	15.76	1	2	3	0.19	0.599	1
APLP1	1165	7740	43	8866	5	34	0	-0.44	0.35	0.599	11.63	13.08	0.98	3	10	0.256	0.599	1
HAMP	1261	7545	6	8800	1	5	0	-0.19	0.09	0.6	16.67	14.32	1.2	1	1	0.438	0.6	1
HRNR	1278	7627	48	8857	9	39	0.27	-0.18	0.64	0.147	18.75	14.33	1.38	1	3	0.6	0.6	1
PDLIM1	1100	6705	6	7799	1	5	0	-0.21	0.11	0.6	16.67	14.09	1.22	1	0	0.16	0.6	1
WNT2B	930	7971	8	8893	1	7	0	-0.24	0.12	0.6	12.5	10.45	1.22	1	1	0.34	0.6	1
PCDHA10	1163	7704	15	8852	2	13	0	-0.3	0.2	0.601	13.33	13.12	1.02	1	1	0.288	0.601	1
OXA1L	1560	7345	5	8900	1	4	0	-0.16	0.08	0.601	20	17.52	1.18	1	1	0.51	0.601	1
ITGA3	1365	7535	5	8895	1	4	0	-0.17	0.09	0.602	20	15.33	1.38	1	1	0.51	0.602	1
KIAA1683	1300	7590	6	8884	1	5	0	-0.18	0.09	0.602	16.67	14.62	1.17	1	0	0.16	0.602	1
SLC15A3	907	7983	8	8882	1	7	0	-0.25	0.12	0.602	12.5	10.2	1.26	1	1	0.34	0.602	1
NDUFB1	1207	6055	19	7243	3	16	0	-0.35	0.3	0.6	15.79	16.62	0.94	1	3	0.602	0.602	1
MIOX	1650	7146	12	8785	2	9	0	-0.19	0.15	0.603	16.67	18.76	0.96	2	1	0.0607	0.603	1
CDHR5	1438	7265	12	8691	2	10	0	-0.25	0.17	0.603	16.67	16.52	1.01	2	1	0.0507	0.603	1
RNF123	2464	6439	14	8889	4	10	0	-0.2	0.17	0.604	28.57	27.67	1.05	2	2	0.319	0.604	1
HRG	1610	7285	10	8885	2	8	0	-0.19	0.15	0.604	20	18.1	1.13	2	0	0.00892	0.604	1
ESPL1	1053	7855	17	8891	2	15	0	-0.32	0.22	0.604	11.76	11.82	0.99	1	3	0.523	0.604	1
ANKMY1	1578	7187	21	8744	4	17	0	-0.31	0.23	0.605	19.05	18	1.07	1	2	0.527	0.605	1
LRRC27	1089	7351	15	8425	2	13	0	-0.32	0.21	0.607	13.33	12.9	1.04	1	3	0.578	0.607	1
CD320	934	5716	14	6636	3	11	0.12	-0.25	0.37	0.321	21.43	14.03	1.67	1	2	0.607	0.607	1
SIAE	936	5533	71	6398	10	61	0	-0.81	0.62	0.607	14.08	14.47	0.97	7	9	0.000369	0.607	1
CIDEC	1906	6918	15	8810	3	11	0	-0.2	0.2	0.527	20	21.6	0.99	1	2	0.607	0.607	1
KRT16	1630	7278	33	8875	6	27	0	-0.38	0.3	0.608	18.18	18.3	0.99	2	2	0.124	0.608	1
CDC42BPG	1171	7737	33	8876	7	25	0.29	-0.1	0.59	0.0941	21.21	13.11	1.85	3	9	0.608	0.608	1
C19orf54	1107	7677	12	8772	3	9	0.21	-0.1	0.31	0.202	25	12.59	2.31	2	4	0.609	0.609	1
OR4L1	1474	7434	5	8903	1	4	0	-0.16	0.08	0.61	20	16.54	1.26	1	0	0.19	0.61	1
TYSND1	1322	7577	13	8886	2	11	0	-0.27	0.18	0.61	15.38	14.85	1.04	1	0	0.12	0.61	1
COL5A3	2643	6265	154	8759	43	106	-0.05	-0.67	0.51	0.61	27.92	29.68	0.96	16	17	0.00107	0.61	1
PDHX	1112	7554	7	8659	1	6	0	-0.21	0.1	0.61	14.29	12.83	1.13	1	1	0.383	0.61	1
ERAP1	2646	6152	17	8781	5	12	0	-0.22	0.16	0.611	29.41	30.08	0.97	3	1	0.0235	0.611	1
SERINC4	1091	7789	7	8873	1	6	0	-0.21	0.1	0.612	14.29	12.28	1.19	1	2	0.587	0.612	1
DGKH	2240	6667	49	8860	15	32	0.18	-0.15	0.54	0.164	30.61	25.11	1.4	5	10	0.612	0.612	1
TPP1	2428	6481	73	8837	19	53	-0.06	-0.48	0.37	0.612	26.03	27.26	0.96	13	7	2.12e-07	0.612	1
SLC25A35	3638	5264	14	8888	6	8	0	-0.19	0.16	0.612	42.86	40.86	1.09	3	0	0.00507	0.612	1
TGM1	1275	7632	42	8865	8	34	0.18	-0.27	0.55	0.259	19.05	14.29	1.41	1	3	0.613	0.613	1
FANK1	935	7973	29	8879	3	26	0	-0.42	0.36	0.613	10.34	10.5	0.98	1	3	0.426	0.613	1
SGCA	1938	6970	33	8876	7	25	0	-0.33	0.26	0.614	21.21	21.76	1.01	3	4	0.147	0.614	1
SPAG1	1175	6623	22	7777	3	18	0	-0.35	0.3	0.614	13.64	15.07	0.94	3	6	0.119	0.614	1
AMN	1134	7573	7	8700	1	6	0	-0.2	0.1	0.614	14.29	13.02	1.11	1	0	0.138	0.614	1
LRP1	1392	7515	218	8690	33	184	-0.09	-0.98	0.77	0.614	15.14	15.64	0.97	18	36	1.68e-05	0.614	1
CDHR2	2177	6732	22	8888	5	16	0	-0.24	0.21	0.591	22.73	24.44	0.97	1	2	0.615	0.615	1
MOV10	1451	7457	25	8883	4	21	0	-0.33	0.25	0.616	16	16.29	0.98	3	4	0.0615	0.616	1
SCLT1	1193	7705	6	8892	1	5	0	-0.19	0.1	0.616	16.67	13.41	1.29	1	0	0.16	0.616	1
ZBTB25	1002	7903	8	8897	1	7	0	-0.22	0.11	0.616	12.5	11.25	1.13	1	2	0.527	0.616	1
RND2	971	7936	9	8898	1	8	0	-0.23	0.12	0.616	11.11	10.9	1.02	1	0	0.108	0.616	1
SLC36A2	1133	6483	6	7610	1	5	0	-0.21	0.1	0.617	16.67	14.88	1.14	1	0	0.16	0.617	1
TRMU	1459	7437	12	8884	2	10	0	-0.25	0.16	0.617	16.67	16.4	1.02	2	1	0.0507	0.617	1
ALDH16A1	1354	7308	15	8647	5	10	0.26	-0.04	0.44	0.077	33.33	15.6	2.7	2	3	0.618	0.618	1
HHATL	1730	6725	15	8440	5	10	0.15	-0.07	0.36	0.155	33.33	20.44	1.94	2	3	0.618	0.618	1
PLEKHG4	1023	5967	15	6975	5	10	0.34	0	0.57	0.0507	33.33	14.59	2.92	2	3	0.618	0.618	1
CELSR1	1533	7316	51	8799	11	39	0.24	-0.24	0.59	0.211	21.57	17.3	1.35	4	13	0.619	0.619	1
HAUS6	2139	6586	8	8717	2	6	0	-0.15	0.12	0.619	25	24.52	1.03	1	1	0.515	0.619	1
SLC35B4	976	5634	9	6601	3	6	0.24	-0.12	0.36	0.139	33.33	14.74	2.89	1	1	0.619	0.619	1
ANPEP	1655	7079	7	8727	4	3	0.22	0.04	0.3	0.0284	57.14	18.92	5.7	2	1	0.619	0.619	1
EPHA2	1246	5399	9	6636	3	6	0.1	-0.1	0.3	0.211	33.33	18.73	2.17	1	1	0.619	0.619	1
LRP2	2091	6818	361	8551	83	275	-0.12	-1.09	0.84	0.619	22.99	23.48	0.98	32	39	6.57e-08	0.619	1
CGB7	1250	6989	6	8233	1	5	0	-0.19	0.09	0.62	16.67	15.17	1.12	1	1	0.438	0.62	1
ACTN4	1107	7330	8	8430	1	6	0	-0.21	0.1	0.62	12.5	13.12	1.1	1	1	0.383	0.62	1
MCF2L	1552	7311	24	8839	4	20	0	-0.31	0.23	0.621	16.67	17.51	0.94	2	4	0.292	0.621	1
SPNS3	2805	5932	6	8731	2	4	0	-0.11	0.11	0.622	33.33	32.1	1.06	2	1	0.216	0.622	1
KIF19	2070	6835	18	8887	4	14	0	-0.25	0.19	0.623	22.22	23.25	0.94	3	0	0.000352	0.623	1
CSF1R	1853	6930	15	8768	3	12	0	-0.24	0.21	0.623	20	21.1	0.93	2	2	0.169	0.623	1
INPP5A	1097	5656	10	6743	2	8	0	-0.22	0.22	0.503	20	16.24	1.29	1	2	0.623	0.623	1
ZNF614	1117	5381	10	6488	2	8	0	-0.22	0.22	0.533	20	17.19	1.2	1	2	0.623	0.623	1
DSG4	1137	7685	44	8780	5	37	0	-0.5	0.35	0.623	11.36	12.89	0.91	4	4	0.00242	0.623	1
GPR1	935	5668	10	6593	2	8	0.12	-0.25	0.25	0.416	20	14.15	1.52	1	2	0.623	0.623	1
ANO9	1582	7136	10	8708	2	8	0	-0.19	0.15	0.577	20	18.14	1.13	1	2	0.623	0.623	1
SPICE1	1005	5714	10	6709	2	8	0.12	-0.23	0.23	0.458	20	14.95	1.42	1	2	0.623	0.623	1
ASPH	906	8003	10	8899	2	8	0.12	-0.12	0.25	0.258	20	10.16	2.21	1	2	0.623	0.623	1
F2	1002	7906	28	8880	3	25	0	-0.45	0.34	0.623	10.71	11.25	0.95	2	5	0.199	0.623	1
MMRN2	1560	7341	8	8894	2	5	0.08	-0.08	0.16	0.341	25	17.52	1.88	2	3	0.624	0.624	1
TRPA1	1194	7062	51	8206	7	43	0	-0.54	0.39	0.625	13.73	14.47	0.96	3	8	0.188	0.625	1
DCST2	1415	7488	19	8884	3	16	0	-0.29	0.25	0.626	15.79	15.89	0.99	2	3	0.19	0.626	1
NOL12	1559	7247	17	8789	4	13	0.08	-0.16	0.31	0.339	23.53	17.69	1.43	1	2	0.626	0.626	1
PLEKHA1	1043	7639	16	8666	2	14	0	-0.33	0.22	0.626	12.5	12.01	1.05	1	2	0.421	0.626	1
NBAS	1656	7248	17	8887	4	13	0.07	-0.19	0.3	0.373	23.53	18.59	1.35	1	2	0.626	0.626	1
NLRP3	1831	7078	32	8878	6	25	0	-0.34	0.27	0.626	18.75	20.56	0.93	3	7	0.327	0.626	1
OR4B1	1091	7818	5	8904	1	4	0	-0.21	0.1	0.627	20	12.24	1.79	1	1	0.51	0.627	1
CHMP4A	1062	7833	16	8879	2	14	0	-0.32	0.21	0.628	12.5	11.94	1.05	1	1	0.271	0.628	1
ATP10A	1414	7494	80	8828	12	68	-0.08	-0.63	0.46	0.628	15	15.88	0.94	3	9	0.262	0.628	1
WDR78	1179	7727	27	8879	5	22	0.2	-0.2	0.44	0.274	18.52	13.22	1.49	1	3	0.629	0.629	1
RXRG	1132	7776	18	8890	7	11	0.51	0.15	0.71	0.00517	38.89	12.65	4.37	3	4	0.63	0.63	1
TMEM8A	1333	7150	13	8470	2	11	0	-0.27	0.18	0.63	15.38	15.71	0.98	1	1	0.33	0.63	1
TPO	1426	7449	40	8836	6	33	0	-0.42	0.33	0.631	15	16.07	0.95	3	10	0.373	0.631	1
NOS2	1207	6936	14	8129	2	12	0	-0.29	0.19	0.632	14.29	14.82	0.96	2	2	0.0967	0.632	1
C9orf131	1836	7069	16	8889	7	9	0.27	0.03	0.45	0.0272	43.75	20.58	2.99	2	2	0.633	0.633	1
MAP3K9	1356	7499	41	8815	7	33	0.09	-0.35	0.44	0.403	17.07	15.3	1.17	2	8	0.633	0.633	1
UBE2O	1093	7800	26	8868	3	22	0	-0.42	0.31	0.633	11.54	12.29	0.97	3	3	0.0125	0.633	1
AASDH	1052	6887	28	7912	5	22	0.22	-0.22	0.49	0.27	17.86	13.23	1.49	2	7	0.634	0.634	1
KRT71	1441	7457	58	8843	9	46	0	-0.46	0.41	0.564	15.52	16.19	1.01	1	4	0.634	0.634	1
FDFT1	2844	6065	21	8890	6	13	0	-0.23	0.18	0.635	28.57	31.92	0.98	3	1	0.0309	0.635	1
CLIP4	1107	7801	16	8892	2	14	0	-0.31	0.21	0.636	12.5	12.43	1.01	1	2	0.421	0.636	1
GAMT	1226	7442	15	8653	2	13	0	-0.29	0.19	0.636	13.33	14.15	0.93	2	3	0.156	0.636	1
ARHGEF15	3036	5849	9	8876	3	6	0	-0.15	0.13	0.637	33.33	34.17	0.96	2	2	0.45	0.637	1
BIN2	1139	7750	27	8864	3	22	0	-0.4	0.3	0.638	11.11	12.82	0.93	2	6	0.318	0.638	1
HHAT	1030	7848	8	8870	1	7	0	-0.22	0.11	0.638	12.5	11.6	1.09	1	2	0.527	0.638	1
OR51G2	1344	7565	14	8895	2	12	0	-0.26	0.18	0.638	14.29	15.09	0.94	2	3	0.178	0.638	1
SLC22A14	1458	7451	18	8891	3	15	0	-0.29	0.25	0.638	16.67	16.36	1.02	3	3	0.035	0.638	1
ATAD5	1041	6054	32	7064	4	27	0	-0.51	0.34	0.639	12.5	14.68	0.86	2	4	0.185	0.639	1
HARS	1231	7665	17	8879	8	9	0.57	0.24	0.75	0.00109	47.06	13.77	5.53	4	4	0.639	0.639	1
KLF17	1052	7633	8	8677	1	7	0	-0.22	0.11	0.639	12.5	12.11	1.04	1	2	0.527	0.639	1
ADAM19	1043	6002	22	7023	4	18	0.11	-0.34	0.39	0.416	18.18	14.79	1.28	1	3	0.639	0.639	1
ADAMTS6	949	7515	9	8455	1	8	0	-0.24	0.12	0.639	11.11	11.21	0.99	1	2	0.478	0.639	1
GPR151	967	7920	19	8868	2	17	0	-0.35	0.23	0.639	10.53	10.88	0.96	2	4	0.156	0.639	1
GFM1	1131	6097	41	7187	6	35	0	-0.52	0.42	0.639	14.63	15.65	0.92	2	2	0.0801	0.639	1
ITIH1	2049	5578	24	7603	6	18	0	-0.33	0.23	0.639	25	26.87	0.91	4	4	0.059	0.639	1
EXD1	1071	7837	8	8900	1	7	0	-0.21	0.11	0.64	12.5	12.02	1.05	1	1	0.34	0.64	1
PIK3C2A	1004	7905	30	8880	3	26	0	-0.45	0.34	0.641	10	11.27	0.91	2	4	0.132	0.641	1
DNAH2	3949	4959	75	8833	32	43	-0.05	-0.43	0.34	0.641	42.67	44.35	0.93	9	8	0.172	0.641	1
PRPSAP1	1651	4939	25	6565	6	19	0	-0.4	0.28	0.641	24	25.06	0.94	4	5	0.096	0.641	1
KRT5	1807	7101	53	8855	10	43	-0.07	-0.45	0.35	0.642	18.87	20.29	0.91	7	8	0.00159	0.642	1
PTK2B	2633	6175	25	8783	9	16	0.05	-0.19	0.3	0.345	36	29.88	1.32	2	3	0.642	0.642	1
HHIPL2	1849	7055	24	8880	5	19	0	-0.31	0.2	0.642	20.83	20.77	1	2	3	0.283	0.642	1
DHX58	1292	6122	20	7395	3	16	0	-0.33	0.23	0.643	15	17.43	0.89	2	4	0.287	0.643	1
FKBP10	1459	7430	25	8864	4	21	0	-0.33	0.25	0.643	16	16.41	0.97	2	5	0.367	0.643	1
POLN	884	4623	63	5445	9	53	-0.13	-0.88	0.61	0.643	14.29	16.07	0.89	7	14	0.00543	0.643	1
APOA1	1181	7633	13	8801	2	11	0	-0.2	0.2	0.518	15.38	13.4	1.18	1	3	0.645	0.645	1
ODAM	1097	6512	14	7596	2	11	0	-0.32	0.21	0.589	14.29	14.42	1.08	1	3	0.645	0.645	1
STAC2	1009	7703	13	8699	2	11	0.11	-0.22	0.22	0.439	15.38	11.58	1.39	1	3	0.645	0.645	1
FCRL4	1137	7344	11	8470	4	7	0.3	0	0.41	0.0505	36.36	13.38	3.69	1	1	0.646	0.646	1
PDLIM7	1320	7585	30	8875	4	26	0	-0.4	0.27	0.646	13.33	14.83	0.88	2	5	0.27	0.646	1
LAD1	1627	7281	5	8903	1	4	0	-0.15	0.08	0.647	20	18.26	1.12	1	0	0.19	0.647	1
TSPAN31	1264	7644	7	8901	1	6	0	-0.18	0.09	0.649	14.29	14.19	1.01	1	0	0.138	0.649	1
HLA-C	1677	6973	11	8639	2	9	0	-0.22	0.15	0.65	18.18	19.39	0.92	2	1	0.0607	0.65	1
ABCD4	1261	7646	50	8857	7	43	0	-0.55	0.37	0.651	14	14.16	0.99	2	5	0.264	0.651	1
WBP11	1191	6713	14	7890	2	12	0	-0.3	0.2	0.651	14.29	15.07	0.94	1	1	0.308	0.651	1
COL10A1	1310	7585	43	8853	10	32	0.36	-0.09	0.72	0.0842	23.26	14.68	1.81	4	12	0.651	0.651	1
SIRT3	1736	6766	16	8486	3	13	0	-0.25	0.18	0.652	18.75	20.42	0.9	3	0	0.000177	0.652	1
NEIL2	1698	7211	5	8904	1	4	0	-0.15	0.07	0.652	20	19.06	1.06	1	1	0.51	0.652	1
ITGB4	1433	7471	100	8806	15	83	-0.08	-0.71	0.46	0.653	15	16.1	0.94	7	18	0.0434	0.653	1
BPI	1160	7742	8	8894	1	7	0	-0.2	0.1	0.654	12.5	13.03	0.95	1	0	0.121	0.654	1
KCNQ4	942	7750	21	8672	2	18	0	-0.36	0.24	0.654	9.52	10.84	0.91	1	4	0.556	0.654	1
USP4	1272	7084	14	8342	2	12	0	-0.28	0.19	0.654	14.29	15.22	0.93	1	2	0.473	0.654	1
TAF5	1049	6364	7	7406	1	6	0	-0.22	0.11	0.654	14.29	14.15	1.01	1	0	0.138	0.654	1
TCTN3	1406	7334	17	8723	3	14	0.08	-0.21	0.25	0.456	17.65	16.08	1.12	1	3	0.655	0.655	1
AMPD2	1670	7239	12	8898	5	6	0.22	0	0.37	0.0356	41.67	18.71	3.61	3	3	0.656	0.656	1
TAOK2	924	6582	16	7490	4	12	0.25	-0.12	0.49	0.128	25	12.28	2.37	1	2	0.656	0.656	1
SLC5A8	897	7022	38	7881	4	34	0	-0.57	0.38	0.656	10.53	11.33	0.92	3	12	0.246	0.656	1
SH3BP2	941	7369	34	8276	6	28	0.24	-0.24	0.6	0.18	17.65	11.3	1.68	2	8	0.656	0.656	1
KCNAB3	1609	7121	22	8709	4	17	0	-0.3	0.23	0.656	18.18	18.43	1.04	4	4	0.0156	0.656	1
SSRP1	1174	7733	25	8882	3	22	0	-0.39	0.25	0.656	12	13.18	0.9	1	3	0.483	0.656	1
FUT11	963	7502	6	8459	2	4	0.12	-0.06	0.23	0.157	33.33	11.36	3.9	1	1	0.657	0.657	1
LRCH1	1617	7291	6	8902	2	4	0.08	-0.08	0.15	0.292	33.33	18.14	2.25	1	1	0.657	0.657	1
POLRMT	1800	6974	6	8768	2	4	0.07	-0.1	0.14	0.432	33.33	20.51	1.94	1	1	0.657	0.657	1
CSGALNACT1	1319	7314	7	8627	2	4	0.09	-0.09	0.18	0.227	28.57	15.27	2.77	1	1	0.657	0.657	1
PFKFB4	1217	7587	24	8780	3	21	0	-0.38	0.24	0.657	12.5	13.83	0.89	1	4	0.6	0.657	1
TIAM1	1300	7560	6	8854	2	4	0.09	-0.09	0.18	0.211	33.33	14.66	2.91	1	1	0.657	0.657	1
SPAG8	969	3804	6	4767	2	4	0.13	-0.13	0.26	0.358	33.33	20.29	1.96	1	1	0.657	0.657	1
SLC25A22	1674	7138	6	8806	2	4	0.07	-0.11	0.15	0.401	33.33	18.99	2.13	1	1	0.657	0.657	1
CYP4A22	1276	5177	5	6448	1	4	0	-0.2	0.1	0.658	20	19.77	1.01	1	0	0.19	0.658	1
ELAC2	1861	3187	30	5019	10	19	-0.09	-0.51	0.38	0.659	33.33	36.88	0.9	3	3	0.3	0.659	1
KRT25	1046	6781	50	7778	6	43	0	-0.61	0.44	0.659	12	13.37	0.9	5	7	0.00223	0.659	1
WDR61	1000	7908	6	8902	1	5	0	-0.17	0.11	0.511	16.67	11.22	1.58	1	2	0.66	0.66	1
ATRNL1	1090	7819	6	8903	1	5	0	-0.16	0.1	0.554	16.67	12.23	1.43	1	2	0.66	0.66	1
S100A1	988	7872	6	8854	1	5	0.11	-0.11	0.11	0.469	16.67	11.15	1.59	1	2	0.66	0.66	1
DOCK7	1037	7872	8	8901	1	7	0	-0.22	0.11	0.66	12.5	11.64	1.08	1	2	0.527	0.66	1
CDX2	921	7879	6	8794	1	5	0.12	-0.12	0.12	0.448	16.67	10.46	1.71	1	2	0.66	0.66	1
GABRD	1279	7370	6	8643	1	5	0	-0.18	0.09	0.609	16.67	14.79	1.15	1	2	0.66	0.66	1
RAF1	1237	7200	6	8431	1	5	0	-0.19	0.09	0.6	16.67	14.66	1.16	1	2	0.66	0.66	1
REEP5	1193	7650	7	8837	1	5	0	-0.19	0.1	0.566	14.29	13.49	1.28	1	2	0.66	0.66	1
POLR3A	883	7444	22	8306	4	17	0.25	-0.13	0.51	0.149	18.18	10.58	1.98	1	3	0.661	0.661	1
SLIT2	1260	7615	74	8801	10	64	-0.09	-0.65	0.42	0.661	13.51	14.2	0.94	5	13	0.0582	0.661	1
SEC14L4	985	4855	21	5819	4	17	0	-0.37	0.37	0.51	19.05	16.86	1.16	1	3	0.661	0.661	1
PDCD11	1827	6945	10	8762	2	8	0	-0.21	0.14	0.662	20	20.83	0.95	1	1	0.421	0.662	1
CHD1	1340	6052	74	7320	12	60	-0.09	-0.68	0.46	0.662	16.22	18.14	0.9	3	9	0.33	0.662	1
FHL5	1234	6960	23	8172	3	19	0	-0.38	0.24	0.662	13.04	15.06	0.89	3	3	0.0186	0.662	1
SPINK4	895	8013	10	8898	1	9	0	-0.25	0.12	0.664	10	10.05	0.99	1	1	0.278	0.664	1
SLC6A5	1642	7267	37	8873	6	30	0	-0.41	0.26	0.664	16.22	18.44	0.89	4	5	0.022	0.664	1
POLQ	980	7929	75	8835	12	62	0.46	-0.17	1.03	0.107	16	10.96	1.57	2	10	0.664	0.664	1
RAB17	1218	5999	10	7207	2	8	0	-0.2	0.2	0.507	20	16.87	1.23	2	5	0.664	0.664	1
EWSR1	1397	7489	25	8861	5	20	0.08	-0.25	0.34	0.35	20	15.71	1.34	1	3	0.665	0.665	1
ACAT2	2539	6353	13	8879	5	8	0.06	-0.11	0.22	0.327	38.46	28.54	1.56	1	1	0.665	0.665	1
FLT3	1819	7089	28	8880	5	23	0	-0.35	0.21	0.665	17.86	20.43	0.85	5	7	0.0132	0.665	1
NSMAF	1218	7690	38	8871	5	32	0	-0.38	0.38	0.554	13.16	13.67	0.99	1	5	0.665	0.665	1
LIM2	1023	7881	25	8879	5	20	0.22	-0.17	0.55	0.177	20	11.47	1.93	1	3	0.665	0.665	1
CNOT10	1195	7626	13	8808	5	8	0.29	0.05	0.48	0.0227	38.46	13.51	3.99	1	1	0.665	0.665	1
LIG1	1287	6329	25	7591	5	20	0.09	-0.28	0.37	0.402	20	16.89	1.23	1	3	0.665	0.665	1
PTPRE	1804	7104	5	8903	1	4	0	-0.14	0.07	0.666	20	20.25	0.98	1	1	0.51	0.666	1
ASPM	1599	7310	90	8819	15	75	-0.08	-0.65	0.42	0.666	16.67	17.96	0.91	11	13	1e-05	0.666	1
PPAP2C	1410	6963	23	8350	5	18	0.09	-0.21	0.34	0.327	21.74	16.83	1.37	2	6	0.666	0.666	1
UMODL1	2183	6697	48	8832	11	37	-0.06	-0.43	0.3	0.666	22.92	24.59	0.91	11	3	4.45e-11	0.666	1
CLCN1	1332	7569	89	8812	12	77	-0.09	-0.71	0.44	0.667	13.48	14.98	0.89	6	19	0.0802	0.667	1
HMBS	2213	6695	33	8875	12	21	0.24	-0.09	0.51	0.0936	36.36	24.8	1.73	3	5	0.667	0.667	1
INSRR	1022	7841	75	8790	12	61	0.44	-0.22	0.94	0.128	16	11.49	1.51	3	15	0.667	0.667	1
ASCC3	2098	6811	23	8886	7	16	0.12	-0.16	0.31	0.277	30.43	23.53	1.42	2	4	0.668	0.668	1
BAIAP3	1093	7773	28	8838	3	25	0	-0.42	0.26	0.668	10.71	12.33	0.85	3	4	0.018	0.668	1
MCOLN2	1116	7138	16	8238	2	14	0	-0.31	0.21	0.669	12.5	13.52	0.91	1	3	0.549	0.669	1
CALB2	1053	7532	8	8577	1	7	0	-0.22	0.11	0.67	12.5	12.27	1.02	1	2	0.527	0.67	1
LRRK2	1574	7334	38	8871	6	31	-0.08	-0.42	0.27	0.67	15.79	17.68	0.9	2	4	0.257	0.67	1
ING1	946	7735	21	8660	2	19	0	-0.36	0.24	0.67	9.52	10.9	0.86	1	5	0.619	0.67	1
PIGO	1993	6914	15	8892	3	12	0	-0.23	0.16	0.67	20	22.38	0.87	2	1	0.0681	0.67	1
TSPAN8	908	7763	11	8661	1	9	0	-0.25	0.12	0.67	9.09	10.47	0.95	1	1	0.278	0.67	1
ABLIM3	1388	7497	21	8864	3	18	0	-0.34	0.21	0.671	14.29	15.62	0.9	2	5	0.33	0.671	1
PFKP	1587	7315	34	8869	7	26	0.08	-0.27	0.38	0.377	20.59	17.81	1.24	1	3	0.671	0.671	1
FCN3	1857	7039	10	8886	2	8	0	-0.2	0.14	0.671	20	20.88	0.95	2	5	0.664	0.671	1
CPB1	1080	7823	18	8885	2	16	0	-0.32	0.21	0.672	11.11	12.13	0.91	1	1	0.242	0.672	1
STK36	1108	5694	20	6782	3	17	0	-0.43	0.27	0.672	15	16.29	0.91	2	3	0.172	0.672	1
RECQL	1458	7450	37	8871	8	29	0.16	-0.21	0.49	0.232	21.62	16.35	1.41	1	3	0.673	0.673	1
ALDH4A1	2304	6605	18	8892	4	13	0	-0.23	0.18	0.673	22.22	25.87	0.88	2	1	0.0921	0.673	1
FNDC3B	1137	7698	8	8827	1	7	0	-0.2	0.1	0.673	12.5	12.87	0.97	1	1	0.34	0.673	1
GRIK4	1564	7344	19	8889	3	16	0	-0.31	0.19	0.674	15.79	17.56	0.88	1	3	0.602	0.674	1
HIST1H4E	1244	6696	10	7931	2	7	0.1	-0.19	0.19	0.422	20	15.66	1.54	1	2	0.675	0.675	1
NOC2L	1237	7511	9	8739	2	7	0.09	-0.19	0.19	0.401	22.22	14.13	1.73	1	2	0.675	0.675	1
HAS1	1245	7647	9	8883	2	7	0.09	-0.14	0.19	0.343	22.22	13.99	1.75	1	2	0.675	0.675	1
QSOX2	1104	5922	9	7017	2	7	0.11	-0.21	0.21	0.421	22.22	15.7	1.53	1	2	0.675	0.675	1
AHSG	1527	7285	9	8803	2	7	0.08	-0.16	0.16	0.463	22.22	17.32	1.36	1	2	0.675	0.675	1
KRT13	2402	6506	83	8828	20	60	-0.06	-0.54	0.34	0.676	24.1	26.98	0.9	8	8	0.0053	0.676	1
CSF2RB	1191	7385	58	8519	7	50	-0.1	-0.59	0.39	0.676	12.07	13.9	0.87	4	5	0.00661	0.676	1
ESYT3	1179	7614	39	8754	5	34	0	-0.49	0.29	0.676	12.82	13.41	0.95	2	9	0.516	0.676	1
IL11RA	1215	7628	14	8829	2	12	0	-0.29	0.19	0.676	14.29	13.74	1.05	2	2	0.0967	0.676	1
EIF2B2	1198	7709	25	8882	3	22	0	-0.39	0.24	0.677	12	13.45	0.88	1	3	0.483	0.677	1
FLNB	2141	6300	247	8196	58	187	-0.19	-0.97	0.66	0.677	23.48	25.41	0.91	24	45	0.00378	0.677	1
KDR	928	7981	46	8866	4	39	0	-0.6	0.36	0.678	8.7	10.42	0.88	2	5	0.142	0.678	1
WISP1	1006	7187	9	8184	1	8	0	-0.23	0.11	0.679	11.11	12.28	0.89	1	0	0.108	0.679	1
TPI1	1462	7436	35	8863	6	29	0	-0.37	0.33	0.527	17.14	16.43	1.05	1	4	0.679	0.679	1
DDX31	1457	7320	15	8763	2	12	0	-0.25	0.16	0.679	13.33	16.6	0.84	2	2	0.0967	0.679	1
ENTPD2	1212	7583	8	8787	1	7	0	-0.19	0.1	0.679	12.5	13.78	0.89	1	0	0.121	0.679	1
UBQLN3	2020	6889	14	8895	4	10	0.06	-0.16	0.22	0.416	28.57	22.66	1.36	2	4	0.679	0.679	1
FGB	1455	7353	21	8788	3	17	0	-0.33	0.21	0.679	14.29	16.52	0.89	2	3	0.172	0.679	1
SMTNL2	3221	5687	12	8896	4	8	0	-0.19	0.15	0.681	33.33	36.16	0.88	2	2	0.426	0.681	1
ADORA3	1297	7610	7	8900	1	6	0	-0.18	0.09	0.682	14.29	14.56	0.98	1	2	0.587	0.682	1
MIF4GD	1147	7760	8	8900	1	6	0	-0.2	0.1	0.683	12.5	12.88	1.13	1	1	0.383	0.683	1
POLL	1113	5239	19	6333	3	16	0	-0.44	0.27	0.683	15.79	17.53	0.88	2	1	0.0414	0.683	1
FAM154A	1485	7078	21	8543	4	16	0.08	-0.24	0.24	0.491	19.05	17.34	1.19	1	3	0.684	0.684	1
CD22	1003	7448	8	8443	1	7	0	-0.23	0.11	0.644	12.5	11.87	1.06	1	3	0.684	0.684	1
POLE	1790	7117	12	8895	3	9	0.07	-0.14	0.21	0.44	25	20.09	1.33	1	2	0.684	0.684	1
NCSTN	1072	7819	13	8879	3	9	0.21	-0.11	0.32	0.157	23.08	12.04	2.43	1	2	0.684	0.684	1
PRKCD	1374	7533	8	8899	3	5	0.17	-0.04	0.26	0.105	37.5	15.41	3.29	1	1	0.684	0.684	1
ADAMDEC1	1145	7759	5	8899	2	3	0.2	0	0.2	0.115	40	12.84	4.52	2	2	0.684	0.684	1
XYLB	1355	7553	17	8892	3	13	0.09	-0.26	0.26	0.484	17.65	15.2	1.29	1	3	0.684	0.684	1
FOXRED2	1477	7084	9	8553	3	5	0.16	-0.04	0.25	0.127	33.33	17.23	2.88	1	1	0.684	0.684	1
SERHL2	1190	5787	20	6957	3	17	0	-0.41	0.25	0.684	15	17.06	0.86	2	3	0.172	0.684	1
DDX52	1129	7779	8	8900	1	7	0	-0.2	0.1	0.684	12.5	12.67	0.98	1	0	0.121	0.684	1
CAPN9	1540	6932	117	8360	19	93	-0.08	-0.75	0.48	0.684	16.24	18.19	0.92	9	17	0.00615	0.684	1
PCDHB15	1207	6503	8	7702	3	5	0.2	-0.05	0.29	0.107	37.5	15.63	3.23	1	1	0.684	0.684	1
HSD17B1	1769	7139	12	8896	3	9	0.07	-0.18	0.21	0.497	25	19.85	1.35	1	2	0.684	0.684	1
ROPN1B	1102	7249	9	8343	3	5	0.21	0	0.31	0.077	33.33	13.17	3.95	1	1	0.684	0.684	1
EFNA1	902	7835	8	8729	1	7	0	-0.25	0.12	0.586	12.5	10.32	1.24	1	3	0.684	0.684	1
PSMC3IP	1785	7123	5	8903	2	3	0.07	-0.07	0.14	0.27	40	20.03	2.66	2	2	0.684	0.684	1
CPNE3	1146	7495	9	8633	1	7	0	-0.2	0.1	0.676	11.11	13.26	0.93	1	3	0.684	0.684	1
SIGLEC1	1588	7313	26	8875	4	22	0	-0.34	0.23	0.686	15.38	17.85	0.84	1	4	0.663	0.686	1
PEAR1	1802	7106	39	8871	7	30	-0.07	-0.42	0.28	0.687	17.95	20.23	0.92	7	4	9.49e-06	0.687	1
TMC8	1283	7511	24	8770	3	21	0	-0.37	0.23	0.687	12.5	14.6	0.84	2	3	0.122	0.687	1
FRMD4A	1475	7430	41	8864	6	35	0	-0.45	0.28	0.666	14.63	16.57	0.86	1	5	0.687	0.687	1
POLR3H	1177	7074	8	8244	3	4	0.2	0	0.3	0.0607	37.5	14.24	4.51	2	2	0.688	0.688	1
SYK	1670	7229	5	8894	3	2	0.15	0	0.22	0.0423	60	18.74	6.49	2	1	0.688	0.688	1
FAM92B	1554	6614	7	8161	3	4	0.16	-0.04	0.24	0.13	42.86	19.01	3.19	2	2	0.688	0.688	1
NDUFS4	948	7935	5	8878	3	2	0.35	0.12	0.35	0.00945	60	10.64	12.56	2	1	0.688	0.688	1
KIAA1804	1346	7189	22	8513	3	19	0	-0.35	0.22	0.688	13.64	15.78	0.84	1	3	0.537	0.688	1
IDUA	1067	7396	25	8438	3	22	0	-0.38	0.32	0.62	12	12.61	0.95	2	11	0.688	0.688	1
NCAPD3	1556	4965	7	6514	3	4	0.08	-0.08	0.25	0.227	42.86	23.84	2.39	2	2	0.688	0.688	1
ENPP7	1039	6504	32	7511	4	28	0	-0.5	0.33	0.688	12.5	13.78	0.89	2	8	0.458	0.688	1
SPATA13	1005	7888	15	8878	2	13	0	-0.28	0.22	0.52	13.33	11.3	1.21	1	4	0.688	0.688	1
PCBD1	1376	7531	15	8892	4	11	0.17	-0.13	0.34	0.202	26.67	15.43	1.99	1	2	0.689	0.689	1
SMARCA4	942	5935	16	6862	4	11	0.25	-0.12	0.49	0.142	25	13.67	2.29	1	2	0.689	0.689	1
TYMP	1778	6985	16	8747	3	13	0	-0.28	0.18	0.689	18.75	20.29	0.91	2	2	0.149	0.689	1
LAMA2	2327	6582	72	8839	17	53	-0.06	-0.49	0.32	0.689	23.61	26.13	0.91	9	10	0.00348	0.689	1
SLC24A4	1660	7247	25	8882	4	21	0	-0.33	0.22	0.69	16	18.64	0.83	2	2	0.102	0.69	1
TRIM5	1178	7718	9	8887	1	8	0	-0.2	0.1	0.691	11.11	13.24	0.82	1	1	0.306	0.691	1
C3orf20	1789	7027	9	8807	4	5	0.14	-0.04	0.28	0.0912	44.44	20.27	3.14	2	2	0.691	0.691	1
TGM7	955	5527	38	6444	5	33	-0.12	-0.68	0.37	0.691	13.16	14.74	0.88	4	6	0.0144	0.691	1
ZIK1	1414	7491	9	8896	4	5	0.25	0	0.34	0.0387	44.44	15.85	4.24	2	2	0.691	0.691	1
ARHGEF10	2636	6257	31	8863	8	22	-0.05	-0.32	0.22	0.692	25.81	29.65	0.86	3	0	0.000782	0.692	1
DDX55	1283	7625	48	8860	6	42	-0.09	-0.55	0.32	0.692	12.5	14.41	0.85	3	8	0.144	0.692	1
DUPD1	1078	5705	22	6761	3	19	0	-0.44	0.28	0.693	13.64	15.9	0.84	2	5	0.305	0.693	1
RPL3L	1205	7472	18	8659	5	13	0.19	-0.1	0.48	0.11	27.78	13.86	2.38	1	2	0.693	0.693	1
PDE11A	1509	7400	37	8872	9	28	0.24	-0.16	0.56	0.154	24.32	16.91	1.58	2	6	0.693	0.693	1
CNTN4	1777	7114	18	8874	3	14	0	-0.28	0.18	0.693	16.67	19.99	0.86	2	2	0.132	0.693	1
GBA2	2152	6756	36	8872	8	28	-0.06	-0.37	0.25	0.693	22.22	24.17	0.9	2	2	0.179	0.693	1
HTR3D	1640	7052	13	8680	2	10	0	-0.23	0.15	0.693	15.38	18.87	0.86	2	1	0.0507	0.693	1
RCBTB1	2163	6571	28	8706	6	22	-0.06	-0.34	0.22	0.694	21.43	24.78	0.83	3	0	0.000337	0.694	1
HCN2	1800	6974	11	8763	2	9	0	-0.21	0.14	0.695	18.18	20.52	0.86	2	2	0.156	0.695	1
ATIC	1599	7310	50	8859	8	42	-0.08	-0.5	0.3	0.695	16	17.96	0.87	6	10	0.00884	0.695	1
PLA1A	1499	7409	63	8845	12	51	0.08	-0.4	0.56	0.39	19.05	16.81	1.16	3	13	0.696	0.696	1
CRYAB	1094	6473	24	7543	3	21	0	-0.43	0.27	0.696	12.5	14.46	0.85	1	5	0.684	0.696	1
CSHL1	1440	7200	21	8619	3	18	0	-0.33	0.21	0.697	14.29	16.67	0.83	1	3	0.557	0.697	1
PNPLA3	2362	6543	30	8875	7	23	-0.06	-0.32	0.2	0.697	23.33	26.54	0.84	3	3	0.0983	0.697	1
GH2	1620	7280	55	8845	9	46	-0.08	-0.53	0.3	0.697	16.36	18.21	0.88	9	5	3.68e-08	0.697	1
FERMT1	1458	7424	35	8847	5	30	-0.08	-0.41	0.25	0.697	14.29	16.42	0.85	2	8	0.522	0.697	1
MEPE	1355	7540	7	8888	1	6	0	-0.17	0.09	0.697	14.29	15.23	0.93	1	0	0.138	0.697	1
ITGB3	1112	4721	79	5757	14	62	-0.11	-0.94	0.56	0.697	17.72	19.07	0.96	9	11	0.000386	0.697	1
EIF3F	909	7872	23	8758	2	21	0	-0.43	0.25	0.698	8.7	10.36	0.82	1	6	0.65	0.698	1
BCS1L	1108	5694	33	6769	7	26	0.22	-0.32	0.54	0.299	21.21	16.27	1.38	2	7	0.698	0.698	1
THBS1	1002	4655	57	5600	9	48	-0.12	-0.85	0.49	0.698	15.79	17.73	0.87	4	6	0.0335	0.698	1
CTRC	2064	6845	24	8885	5	19	-0.06	-0.32	0.19	0.699	20.83	23.17	0.87	3	6	0.303	0.699	1
GPSM1	1317	5805	17	7105	6	11	0.28	-0.05	0.56	0.0786	35.29	18.45	2.4	3	5	0.7	0.7	1
COL5A1	2688	6221	159	8752	45	112	-0.11	-0.72	0.45	0.7	28.3	30.2	0.93	21	21	3.53e-05	0.7	1
ERCC2	1287	7275	103	8459	14	89	-0.09	-0.82	0.5	0.7	13.59	15.05	0.89	7	8	0.000217	0.7	1
ACOT8	1378	6946	24	8300	4	20	0	-0.35	0.26	0.582	16.67	16.55	1.01	1	4	0.701	0.701	1
PDHB	1944	6964	16	8892	3	13	0	-0.26	0.16	0.701	18.75	21.83	0.83	3	2	0.0197	0.701	1
RAB34	1298	7248	10	8536	4	6	0.27	0	0.36	0.0457	40	15.16	3.72	1	1	0.701	0.701	1
PPM1J	1332	7575	8	8899	1	7	0	-0.18	0.09	0.702	12.5	14.96	0.81	1	1	0.34	0.702	1
C3	2222	6685	9	8898	2	7	0	-0.18	0.12	0.702	22.22	24.95	0.86	2	0	0.0112	0.702	1
EPS8L3	1729	7180	12	8897	2	10	0	-0.22	0.14	0.703	16.67	19.41	0.83	1	3	0.683	0.703	1
LRIT2	1932	6666	25	8573	12	13	0.4	0.13	0.67	0.00435	48	22.4	3.18	2	2	0.703	0.703	1
SLC44A3	1522	7381	27	8876	4	23	-0.08	-0.4	0.24	0.703	14.81	17.1	0.84	2	4	0.237	0.703	1
CACNA1D	2291	6563	141	8713	34	107	-0.12	-0.74	0.44	0.703	24.11	25.9	0.91	17	20	7.16e-05	0.703	1
CDH17	1686	7223	12	8897	2	10	0	-0.22	0.15	0.703	16.67	18.93	0.86	2	1	0.0507	0.703	1
DOPEY2	1778	7127	29	8876	5	24	-0.07	-0.35	0.21	0.704	17.24	19.98	0.84	2	2	0.114	0.704	1
PCSK1	1027	6849	33	7843	4	29	0	-0.5	0.34	0.667	12.12	13.04	0.92	1	6	0.705	0.705	1
TAS2R14	1024	7858	11	8871	1	10	0	-0.28	0.11	0.706	9.09	11.53	0.77	1	4	0.651	0.706	1
CD200R1	971	7620	9	8582	1	8	0	-0.23	0.12	0.706	11.11	11.3	0.98	1	0	0.108	0.706	1
TLN2	1587	7321	44	8865	7	36	-0.08	-0.46	0.27	0.706	15.91	17.82	0.9	6	6	0.000594	0.706	1
SLC27A3	887	7682	24	8546	2	21	0	-0.44	0.25	0.707	8.33	10.36	0.82	1	2	0.304	0.707	1
GJC1	2264	6644	23	8885	5	18	-0.06	-0.3	0.18	0.708	21.74	25.42	0.82	2	2	0.181	0.708	1
ACSF3	1297	7458	19	8736	3	16	0	-0.27	0.27	0.568	15.79	14.81	1.08	1	4	0.708	0.708	1
CENPE	1241	4936	30	6148	5	24	-0.1	-0.5	0.3	0.708	16.67	20.1	0.83	3	1	0.00376	0.708	1
EPX	1334	5965	87	7212	14	73	-0.09	-0.78	0.46	0.708	16.09	18.3	0.86	6	10	0.0129	0.708	1
PDE9A	1312	7561	19	8854	3	16	0	-0.27	0.27	0.506	15.79	14.78	1.08	1	4	0.708	0.708	1
LIG3	1253	6923	29	8147	7	22	0.28	-0.14	0.57	0.144	24.14	15.29	1.76	2	6	0.709	0.709	1
VILL	1266	3812	18	5060	4	14	0	-0.47	0.32	0.71	22.22	24.94	0.86	1	2	0.598	0.71	1
CATSPERB	1468	7413	8	8874	1	6	0	-0.16	0.08	0.711	12.5	16.53	0.84	1	0	0.138	0.711	1
FTCD	1630	7064	32	8663	5	26	-0.08	-0.38	0.23	0.712	15.62	18.76	0.83	3	4	0.0623	0.712	1
TNFRSF10D	1363	7538	14	8887	2	12	0	-0.26	0.17	0.712	14.29	15.31	0.92	2	2	0.0967	0.712	1
HK1	1589	7320	42	8867	9	33	0.15	-0.27	0.46	0.337	21.43	17.82	1.26	3	11	0.712	0.712	1
ADAM11	1876	6953	5	8824	1	4	0	-0.14	0.07	0.713	20	21.25	0.93	1	1	0.51	0.713	1
KIF27	1187	6664	32	7821	4	26	-0.1	-0.5	0.3	0.713	12.5	15.13	0.86	3	6	0.094	0.713	1
IRF7	1438	7265	62	8641	9	53	-0.08	-0.58	0.33	0.713	14.52	16.54	0.86	4	11	0.145	0.713	1
ATP6V0A4	1039	7801	50	8791	5	44	-0.11	-0.6	0.33	0.714	10	11.76	0.85	3	9	0.113	0.714	1
PGM3	881	4430	7	5304	1	6	0	-0.27	0.14	0.714	14.29	16.59	0.84	1	2	0.587	0.714	1
ZHX2	984	7150	20	8114	2	18	0	-0.4	0.23	0.714	10	12.1	0.81	1	3	0.457	0.714	1
MST1R	1936	6958	36	8858	7	29	-0.07	-0.4	0.23	0.715	19.44	21.78	0.87	4	5	0.0422	0.715	1
PCDHAC1	1103	6270	26	7349	3	21	0	-0.43	0.27	0.715	11.54	14.97	0.81	3	1	0.0012	0.715	1
MYBPHL	1975	6934	15	8894	3	12	0	-0.23	0.2	0.631	20	22.17	0.88	1	3	0.715	0.715	1
AAAS	1053	7855	49	8859	5	44	-0.11	-0.59	0.32	0.716	10.2	11.83	0.85	3	10	0.144	0.716	1
PKDREJ	1293	4856	28	6121	5	23	-0.1	-0.49	0.29	0.716	17.86	21.04	0.82	3	3	0.044	0.716	1
ZNF544	999	7399	21	8378	2	18	0	-0.4	0.23	0.716	9.52	11.9	0.82	2	4	0.142	0.716	1
LAMB2	1931	6657	33	8555	9	24	0.07	-0.23	0.4	0.362	27.27	22.47	1.29	3	8	0.716	0.716	1
TNNT3	1381	7474	16	8839	2	14	0	-0.3	0.17	0.716	12.5	15.6	0.77	1	3	0.549	0.716	1
C5orf45	1855	6698	32	8521	13	19	0.41	0.1	0.72	0.0111	40.62	21.62	2.47	4	6	0.717	0.717	1
LSS	1668	7224	19	8873	3	16	0	-0.3	0.15	0.717	15.79	18.76	0.81	2	1	0.0414	0.717	1
ADCK4	1025	7751	18	8759	2	15	0	-0.33	0.22	0.613	11.11	11.68	1.01	1	5	0.717	0.717	1
RFNG	1599	7076	13	8662	2	11	0	-0.23	0.15	0.717	15.38	18.44	0.8	2	1	0.043	0.717	1
WDR17	1761	7148	12	8897	2	10	0	-0.21	0.14	0.717	16.67	19.77	0.81	1	2	0.539	0.717	1
GPR97	2057	6849	5	8901	1	4	0	-0.13	0.06	0.718	20	23.1	0.83	1	0	0.19	0.718	1
LRP2BP	1163	7638	9	8792	1	8	0	-0.25	0.1	0.718	11.11	13.22	0.82	1	1	0.306	0.718	1
CNPY4	1829	7076	12	8893	2	10	0	-0.21	0.14	0.719	16.67	20.54	0.77	1	3	0.683	0.719	1
SLC43A3	923	7984	15	8893	2	12	0.12	-0.24	0.24	0.448	13.33	10.36	1.44	1	4	0.72	0.72	1
TLR3	1052	7284	24	8313	4	19	0.11	-0.27	0.44	0.337	16.67	12.61	1.46	1	4	0.72	0.72	1
ASCL3	1498	7381	57	8823	8	48	-0.08	-0.56	0.32	0.72	14.04	16.89	0.82	5	7	0.00616	0.72	1
LPO	1259	6213	68	7404	10	58	-0.1	-0.72	0.43	0.72	14.71	16.87	0.85	7	12	0.0028	0.72	1
SERPINA11	919	7457	25	8354	2	20	0	-0.43	0.24	0.721	8	10.98	0.81	2	3	0.0741	0.721	1
GOLGA3	1540	7365	34	8871	5	29	-0.08	-0.43	0.24	0.721	14.71	17.3	0.82	4	4	0.00589	0.721	1
EMR3	1279	7628	25	8882	3	22	0	-0.41	0.18	0.721	12	14.37	0.81	1	4	0.581	0.721	1
PTPRK	1333	7573	8	8898	1	7	0	-0.22	0.09	0.721	12.5	14.97	0.81	1	1	0.34	0.721	1
APRT	1268	7429	15	8682	2	13	0	-0.32	0.18	0.721	13.33	14.58	0.9	1	4	0.688	0.721	1
CTSA	1151	6825	25	7951	3	22	0	-0.41	0.2	0.722	12	14.44	0.81	2	6	0.318	0.722	1
DLL1	1458	7444	23	8880	3	19	0	-0.33	0.16	0.722	13.04	16.39	0.81	2	6	0.393	0.722	1
GABRR1	1917	6992	27	8882	5	22	-0.07	-0.33	0.2	0.722	18.52	21.53	0.83	2	2	0.132	0.722	1
F11	1594	7238	39	8794	6	32	-0.08	-0.46	0.27	0.723	15.38	18.06	0.85	3	6	0.143	0.723	1
ZNF221	1535	7371	14	8892	2	12	0	-0.28	0.16	0.723	14.29	17.24	0.8	2	0	0.00432	0.723	1
FBP1	1396	7491	31	8856	4	27	-0.08	-0.42	0.25	0.724	12.9	15.72	0.79	4	3	0.0011	0.724	1
ALDH8A1	935	5330	22	6243	3	19	0	-0.44	0.38	0.613	13.64	14.93	0.9	1	5	0.724	0.724	1
MPRIP	1568	7058	14	8612	4	10	0.16	-0.12	0.31	0.204	28.57	18.16	1.8	1	2	0.724	0.724	1
ACY3	1201	7700	44	8858	7	36	0.1	-0.34	0.48	0.38	15.91	13.48	1.25	1	5	0.724	0.724	1
PIKFYVE	1030	7879	12	8898	2	9	0.11	-0.22	0.22	0.389	16.67	11.55	1.7	1	3	0.725	0.725	1
SYCE1	1109	7797	11	8895	2	9	0.1	-0.21	0.21	0.449	18.18	12.45	1.56	1	3	0.725	0.725	1
SPIRE2	1407	6569	11	7965	2	9	0	-0.26	0.17	0.615	18.18	17.64	1.04	1	3	0.725	0.725	1
ITIH4	1968	6356	16	8309	3	12	0	-0.27	0.13	0.725	18.75	23.65	0.81	1	1	0.388	0.725	1
CELSR3	1200	7280	35	8446	6	28	0.1	-0.29	0.49	0.326	17.14	14.14	1.3	2	9	0.726	0.726	1
ATR	1291	7530	18	8804	2	15	0	-0.32	0.18	0.726	11.11	14.64	0.78	1	4	0.629	0.726	1
PLG	1825	6991	17	8799	3	14	0	-0.28	0.14	0.726	17.65	20.71	0.82	2	4	0.348	0.726	1
C1orf50	983	7925	11	8897	1	10	0	-0.29	0.11	0.727	9.09	11.04	0.81	1	2	0.403	0.727	1
LLGL2	2013	6855	11	8857	3	8	0.06	-0.16	0.19	0.498	27.27	22.69	1.28	1	2	0.728	0.728	1
TRIP6	1655	7238	11	8882	3	8	0.07	-0.15	0.22	0.331	27.27	18.6	1.64	1	2	0.728	0.728	1
HGD	917	7986	57	8847	7	49	0.24	-0.43	0.61	0.328	12.28	10.29	1.24	1	7	0.728	0.728	1
GYS1	1572	7325	28	8870	4	23	-0.08	-0.39	0.23	0.728	14.29	17.68	0.81	3	8	0.242	0.728	1
NUP214	1353	7514	40	8827	5	35	-0.09	-0.48	0.26	0.729	12.5	15.27	0.79	1	5	0.63	0.729	1
MYBBP1A	2987	5916	10	8893	3	7	0	-0.18	0.1	0.729	30	33.55	0.85	1	1	0.564	0.729	1
SUSD3	965	5639	8	6596	1	7	0	-0.3	0.12	0.73	12.5	14.61	0.83	1	2	0.527	0.73	1
WDR6	1182	7390	20	8553	7	12	0.49	0.15	0.69	0.00557	35	13.74	3.65	3	5	0.731	0.731	1
CORIN	1162	7723	116	8770	13	102	-0.2	-0.89	0.5	0.731	11.21	13.1	0.85	4	16	0.175	0.731	1
BTBD16	1659	6246	12	7893	2	10	0	-0.23	0.15	0.732	16.67	20.99	0.75	1	2	0.539	0.732	1
LRSAM1	2007	6828	27	8809	5	21	-0.06	-0.32	0.19	0.732	18.52	22.73	0.81	3	2	0.0225	0.732	1
SCO1	1916	6592	17	8491	3	14	-0.07	-0.27	0.13	0.732	17.65	22.53	0.74	3	2	0.0162	0.732	1
DEFB132	1705	7195	7	8893	1	6	0	-0.15	0.07	0.732	14.29	19.16	0.7	1	1	0.383	0.732	1
ITGA7	1186	7377	35	8528	4	31	-0.1	-0.49	0.29	0.733	11.43	13.86	0.8	2	9	0.465	0.733	1
NHLRC2	1001	7448	10	8439	1	9	0	-0.28	0.11	0.733	10	11.85	0.83	1	2	0.438	0.733	1
SP110	1674	7235	19	8891	3	15	0	-0.29	0.18	0.681	15.79	18.79	0.86	1	4	0.733	0.733	1
PLD2	3773	5135	16	8892	6	10	-0.05	-0.21	0.14	0.733	37.5	42.36	0.82	4	1	0.00857	0.733	1
CD101	1450	7456	18	8888	3	15	0	-0.25	0.25	0.58	16.67	16.28	1.03	1	4	0.733	0.733	1
VLDLR	1181	3912	93	5003	19	71	-0.22	-1.1	0.61	0.733	20.43	23.23	0.89	10	19	0.0243	0.733	1
CAMTA1	1960	6948	8	8900	2	6	0	-0.13	0.13	0.562	25	22	1.18	1	2	0.734	0.734	1
LTBR	1039	7866	8	8897	2	6	0.11	-0.11	0.22	0.223	25	11.66	2.52	1	2	0.734	0.734	1
ANGPTL4	996	6225	8	7213	2	6	0.12	-0.12	0.23	0.317	25	13.78	2.08	1	2	0.734	0.734	1
C9orf89	1340	7541	8	8873	2	6	0.09	-0.09	0.18	0.329	25	15.08	1.88	1	2	0.734	0.734	1
CASP9	2068	6841	8	8901	2	6	0	-0.16	0.13	0.607	25	23.21	1.1	1	2	0.734	0.734	1
DZIP1L	1276	7484	17	8743	2	15	0	-0.32	0.18	0.735	11.76	14.57	0.78	1	4	0.629	0.735	1
TLR6	1004	6694	18	7680	4	14	0.23	-0.17	0.46	0.22	22.22	13.02	1.9	1	3	0.735	0.735	1
BAZ1A	1064	6532	9	7587	1	8	0	-0.27	0.11	0.736	11.11	14.01	0.77	1	3	0.627	0.736	1
CA9	2463	6446	17	8892	4	13	-0.06	-0.25	0.17	0.736	23.53	27.65	0.81	1	2	0.626	0.736	1
SEC31B	1198	4040	46	5193	9	36	-0.11	-0.76	0.43	0.736	19.57	22.9	0.84	3	6	0.25	0.736	1
SCLY	965	7694	34	8626	3	30	-0.12	-0.52	0.23	0.737	8.82	11.15	0.8	3	2	0.00197	0.737	1
ABHD12B	1490	7288	7	8771	1	6	0	-0.2	0.08	0.737	14.29	16.98	0.82	1	2	0.587	0.737	1
UNC119	1470	7415	17	8869	2	14	0	-0.29	0.16	0.737	11.76	16.55	0.72	1	3	0.549	0.737	1
OR1A2	2113	6744	10	8847	2	8	0	-0.19	0.12	0.737	20	23.86	0.8	2	2	0.189	0.737	1
ADAM7	1108	4738	13	5833	2	11	0	-0.39	0.22	0.738	15.38	18.96	0.78	2	1	0.043	0.738	1
KRT23	1417	6431	34	7815	5	28	-0.09	-0.47	0.26	0.738	14.71	18.07	0.81	1	3	0.538	0.738	1
USP28	1001	7907	19	8889	2	17	0	-0.34	0.23	0.631	10.53	11.24	0.93	1	6	0.739	0.739	1
EPHA1	1253	7653	43	8863	5	38	-0.09	-0.56	0.28	0.739	11.63	14.08	0.8	3	9	0.159	0.739	1
ZZEF1	3215	5693	9	8899	3	6	0	-0.15	0.1	0.739	33.33	36.09	0.89	1	1	0.619	0.739	1
TTC16	1104	6616	17	7703	2	15	0	-0.37	0.21	0.74	11.76	14.31	0.8	1	3	0.523	0.74	1
SERPINA6	1788	7092	36	8845	6	29	-0.07	-0.42	0.21	0.741	16.67	20.15	0.82	5	4	0.00122	0.741	1
EPHA4	1011	7662	12	8662	1	10	0	-0.34	0.11	0.741	8.33	11.66	0.76	1	2	0.403	0.741	1
NEFH	1755	7149	42	8862	7	35	-0.07	-0.46	0.25	0.741	16.67	19.72	0.81	4	10	0.179	0.741	1
PHYH	1142	7766	48	8860	5	43	-0.1	-0.6	0.3	0.742	10.42	12.83	0.79	2	7	0.272	0.742	1
KIAA0195	1692	7123	42	8774	7	34	-0.07	-0.48	0.26	0.743	16.67	19.2	0.87	4	3	0.00502	0.743	1
JUP	2184	6724	5	8903	1	4	0	-0.12	0.06	0.743	20	24.52	0.77	1	0	0.19	0.743	1
NAGLU	1852	7056	41	8868	7	33	-0.07	-0.44	0.24	0.743	17.07	20.81	0.81	4	8	0.114	0.743	1
VPS13C	1574	7334	40	8869	8	31	0.08	-0.27	0.42	0.366	20	17.66	1.2	1	4	0.744	0.744	1
PRKCQ	1350	7227	16	8561	2	14	0	-0.31	0.18	0.744	12.5	15.75	0.76	2	4	0.216	0.744	1
CUL4A	1297	7610	8	8899	1	7	0	-0.23	0.09	0.744	12.5	14.56	0.84	1	3	0.684	0.744	1
HTR3C	1638	7049	40	8649	6	32	-0.08	-0.45	0.23	0.744	15	18.87	0.81	3	7	0.198	0.744	1
RBP4	1617	7288	7	8898	1	6	0	-0.19	0.08	0.745	14.29	18.16	0.75	1	0	0.138	0.745	1
HR	1447	5945	6	7386	1	5	0	-0.17	0.09	0.745	16.67	19.58	0.82	1	0	0.16	0.745	1
TTC5	1038	7848	22	8865	3	18	0.11	-0.27	0.33	0.43	13.64	11.68	1.26	1	5	0.745	0.745	1
OSBPL1A	978	5606	17	6567	2	15	0	-0.48	0.24	0.745	11.76	14.86	0.76	1	0	0.0909	0.745	1
PLA2G4D	1272	7238	8	8502	1	7	0	-0.23	0.09	0.745	12.5	14.95	0.81	1	1	0.34	0.745	1
MYL7	919	7984	21	8882	3	18	0.12	-0.24	0.36	0.384	14.29	10.31	1.45	1	5	0.745	0.745	1
XDH	1269	7640	43	8866	5	38	-0.09	-0.55	0.28	0.746	11.63	14.26	0.79	3	8	0.122	0.746	1
ANO7	1857	7041	23	8875	4	19	-0.07	-0.34	0.2	0.746	17.39	20.88	0.8	1	4	0.72	0.746	1
SMTN	1350	7349	16	8683	2	14	0	-0.35	0.18	0.746	12.5	15.52	0.78	1	5	0.746	0.746	1
BCL2L12	964	7941	12	8893	1	11	0	-0.35	0.12	0.747	8.33	10.83	0.75	1	2	0.373	0.747	1
ERBB3	1119	7766	20	8865	2	18	0	-0.41	0.2	0.747	10	12.6	0.77	1	3	0.457	0.747	1
TAS1R2	2304	6605	86	8823	20	66	-0.12	-0.61	0.32	0.747	23.26	25.89	0.87	8	13	0.0448	0.747	1
VEPH1	1332	7030	27	8336	5	21	0.09	-0.27	0.36	0.385	18.52	15.92	1.26	1	4	0.747	0.747	1
MICAL1	1543	5621	38	7127	13	24	0.41	0	0.78	0.0415	34.21	21.47	1.97	3	6	0.747	0.747	1
OLFM4	1299	6618	44	7873	6	38	-0.09	-0.6	0.28	0.747	13.64	16.42	0.8	3	6	0.0958	0.747	1
ACBD5	1096	7802	20	8878	2	18	0	-0.42	0.21	0.748	10	12.32	0.79	1	4	0.556	0.748	1
GAS7	1743	6547	6	8284	1	5	0	-0.15	0.07	0.748	16.67	21.03	0.75	1	0	0.16	0.748	1
POLR2C	1158	7232	14	8376	3	11	0.1	-0.2	0.3	0.298	21.43	13.79	1.7	1	3	0.748	0.748	1
PLEKHA4	1732	6339	6	8065	1	5	0	-0.15	0.07	0.748	16.67	21.46	0.73	1	2	0.66	0.748	1
ADCY9	985	7921	30	8876	4	26	0.11	-0.34	0.4	0.453	13.33	11.05	1.24	1	6	0.748	0.748	1
SLC29A2	998	7900	13	8885	5	8	0.45	0.11	0.56	0.0098	38.46	11.18	4.95	2	3	0.749	0.749	1
ROS1	2305	6602	85	8825	19	63	-0.12	-0.61	0.32	0.749	22.35	25.9	0.86	11	14	0.0017	0.749	1
OR2AE1	920	7003	5	7918	1	4	0.12	-0.12	0.12	0.422	20	11.61	1.9	1	2	0.75	0.75	1
CDK20	1001	7772	7	8766	1	6	0	-0.23	0.11	0.566	14.29	11.41	1.29	1	3	0.75	0.75	1
PPIL6	870	5578	7	6441	1	6	0	-0.27	0.13	0.63	14.29	13.49	1.07	1	3	0.75	0.75	1
C6orf118	1321	7348	5	8664	1	4	0	-0.13	0.09	0.563	20	15.24	1.39	1	2	0.75	0.75	1
VAMP5	1223	7683	7	8901	1	4	0	-0.14	0.09	0.52	14.29	13.73	1.57	1	2	0.75	0.75	1
PLXNB1	2043	6866	5	8904	1	4	0	-0.13	0.06	0.704	20	22.93	0.84	1	2	0.75	0.75	1
TSC22D1	952	7634	5	8581	1	4	0.12	-0.12	0.12	0.434	20	11.08	2	1	2	0.75	0.75	1
SAMD15	1073	5691	8	6756	1	7	0	-0.28	0.11	0.751	12.5	15.87	0.76	1	1	0.34	0.751	1
ACCS	1177	7625	42	8761	6	35	0	-0.39	0.39	0.501	14.29	13.37	1.11	1	6	0.752	0.752	1
SELENBP1	1039	7868	11	8896	1	10	0	-0.33	0.11	0.752	9.09	11.67	0.76	1	1	0.254	0.752	1
SLC26A10	1147	7761	48	8860	5	43	-0.1	-0.6	0.3	0.753	10.42	12.89	0.79	3	6	0.0455	0.753	1
ALPK2	2755	6152	19	8888	5	14	-0.05	-0.26	0.16	0.754	26.32	30.94	0.8	3	3	0.144	0.754	1
CALR	1047	7846	7	8888	2	3	0.22	0	0.22	0.108	28.57	11.76	5	1	1	0.756	0.756	1
IGDCC4	948	6021	5	6964	2	3	0.12	0	0.24	0.129	40	13.58	4.23	1	1	0.756	0.756	1
KIF3A	1006	7903	5	8904	2	3	0.11	-0.06	0.22	0.173	40	11.28	5.24	1	1	0.756	0.756	1
MYCBPAP	2354	6377	5	8726	2	3	0.06	-0.09	0.12	0.444	40	26.95	1.81	1	1	0.756	0.756	1
PADI3	1407	7356	5	8758	2	3	0.08	-0.08	0.17	0.191	40	16.04	3.49	1	1	0.756	0.756	1
CTR9	1564	7345	5	8904	2	3	0.08	-0.08	0.16	0.21	40	17.54	3.13	1	1	0.756	0.756	1
SLC25A44	1046	7466	22	8491	2	19	0	-0.44	0.22	0.741	9.09	12.3	0.75	1	7	0.756	0.756	1
METTL3	1688	7220	5	8903	2	3	0.07	-0.07	0.15	0.225	40	18.94	2.85	1	1	0.756	0.756	1
FBXW12	1852	7057	5	8904	2	3	0.07	-0.1	0.14	0.433	40	20.78	2.54	1	1	0.756	0.756	1
GRIA1	1275	7446	13	8708	2	11	0	-0.23	0.18	0.578	15.38	14.62	1.06	1	4	0.756	0.756	1
YTHDC2	1952	5847	5	7794	2	3	0.07	-0.07	0.14	0.364	40	25.02	2	1	1	0.756	0.756	1
GSG2	3466	5442	5	8903	2	3	0	-0.09	0.09	0.656	40	38.91	1.05	1	1	0.756	0.756	1
PTPRU	1270	6337	13	7594	2	11	0	-0.28	0.19	0.67	15.38	16.7	0.91	1	4	0.756	0.756	1
ATP5S	1289	7233	6	8516	1	5	0	-0.18	0.09	0.758	16.67	15.12	1.12	1	2	0.66	0.758	1
PIF1	1021	7845	11	8855	1	10	0	-0.33	0.11	0.758	9.09	11.52	0.77	1	1	0.254	0.758	1
KIFC3	1062	7720	12	8770	1	11	0	-0.32	0.11	0.758	8.33	12.1	0.66	1	3	0.498	0.758	1
ZSCAN29	893	5149	9	6033	1	8	0	-0.39	0.13	0.759	11.11	14.79	0.72	1	2	0.478	0.759	1
EPHB3	1175	5872	17	7031	2	14	0	-0.41	0.2	0.759	11.76	16.68	0.71	1	1	0.271	0.759	1
NUCB1	1943	6918	7	8854	3	4	0.13	-0.07	0.2	0.185	42.86	21.91	2.67	1	1	0.76	0.76	1
MBTPS1	2108	6798	7	8899	3	4	0.06	-0.06	0.19	0.228	42.86	23.65	2.42	1	1	0.76	0.76	1
KDM1B	1691	7218	13	8896	2	11	0	-0.26	0.15	0.76	15.38	18.99	0.78	2	2	0.112	0.76	1
LAMB3	1969	6932	19	8884	3	14	-0.07	-0.26	0.13	0.76	15.79	22.13	0.75	1	3	0.655	0.76	1
FCRL6	1213	7681	17	8877	3	14	0.1	-0.24	0.29	0.44	17.65	13.63	1.36	1	4	0.76	0.76	1
RNF26	2167	6741	7	8901	3	4	0.06	-0.06	0.18	0.248	42.86	24.31	2.33	1	1	0.76	0.76	1
TATDN1	928	6325	18	7236	3	14	0.12	-0.25	0.37	0.378	16.67	12.78	1.46	1	4	0.76	0.76	1
RUFY1	1838	7053	6	8885	1	5	0	-0.17	0.07	0.761	16.67	20.68	0.77	1	1	0.438	0.761	1
PIK3R5	1981	4437	16	6402	4	12	-0.07	-0.33	0.18	0.761	25	30.88	0.75	2	1	0.105	0.761	1
CLSTN2	1176	7714	10	8880	1	9	0	-0.29	0.1	0.762	10	13.23	0.73	1	1	0.278	0.762	1
KRT84	1541	7323	35	8829	5	30	-0.08	-0.47	0.24	0.762	14.29	17.4	0.79	2	7	0.447	0.762	1
FUT2	1622	7257	49	8830	7	42	-0.08	-0.53	0.26	0.762	14.29	18.29	0.75	4	10	0.106	0.762	1
UBTF	1408	7493	24	8877	3	21	-0.08	-0.38	0.17	0.763	12.5	15.83	0.76	2	0	0.00301	0.763	1
CDHR1	1989	6903	13	8879	4	9	0.06	-0.13	0.26	0.297	30.77	22.36	1.54	1	2	0.763	0.763	1
KRT6C	1664	7236	49	8854	7	39	-0.07	-0.52	0.26	0.763	14.29	18.71	0.78	2	9	0.601	0.763	1
EPHA3	1043	5210	22	6232	4	17	0.12	-0.35	0.4	0.461	18.18	16.67	1.18	1	4	0.763	0.763	1
CHRNB4	1127	7773	31	8871	4	25	0.1	-0.3	0.36	0.484	12.9	12.66	1.1	1	6	0.763	0.763	1
ANKRD27	1119	7335	30	8424	3	27	-0.1	-0.51	0.21	0.764	10	13.25	0.73	1	7	0.713	0.764	1
COL1A1	1938	6970	87	8823	16	69	-0.13	-0.66	0.33	0.765	18.39	21.78	0.83	9	17	0.0124	0.765	1
NDUFS2	1654	6769	13	8410	2	11	0	-0.26	0.15	0.765	15.38	19.64	0.74	2	2	0.112	0.765	1
NCAPD2	1992	6916	28	8883	5	20	-0.06	-0.32	0.19	0.693	17.86	22.37	0.87	1	4	0.765	0.765	1
ANKRD2	1538	6243	6	7775	1	5	0	-0.2	0.08	0.765	16.67	19.77	0.81	1	0	0.16	0.765	1
KRT83	1201	7285	36	8451	4	31	-0.1	-0.53	0.24	0.767	11.11	14.16	0.78	3	5	0.0386	0.767	1
GGCX	1283	7623	60	8846	7	53	-0.09	-0.64	0.32	0.768	11.67	14.42	0.78	4	6	0.00983	0.768	1
WRN	2248	6661	24	8885	5	19	-0.06	-0.33	0.18	0.768	20.83	25.24	0.78	5	4	0.00281	0.768	1
MYH10	2268	6634	81	8822	18	62	-0.12	-0.62	0.3	0.769	22.22	25.5	0.85	11	15	0.00199	0.769	1
2017-09-12	1822	7085	19	8888	3	16	-0.07	-0.31	0.14	0.769	15.79	20.47	0.73	3	0	9.95e-05	0.769	1
ZNF256	1259	7647	19	8887	2	17	-0.09	-0.37	0.19	0.769	10.53	14.14	0.71	1	0	0.081	0.769	1
PSMD3	1700	7207	31	8877	7	23	0.07	-0.22	0.36	0.36	22.58	19.07	1.29	2	7	0.769	0.769	1
IL7R	1201	7612	28	8785	3	25	-0.1	-0.48	0.19	0.77	10.71	13.64	0.76	1	4	0.532	0.77	1
OVGP1	1459	5175	18	6616	3	15	-0.09	-0.4	0.18	0.77	16.67	22.01	0.71	2	3	0.21	0.77	1
ALDH1L2	1149	7335	73	8411	8	65	-0.2	-0.75	0.35	0.77	10.96	13.57	0.79	5	11	0.0109	0.77	1
APOA4	1419	7456	34	8841	6	28	0.08	-0.29	0.38	0.416	17.65	15.98	1.13	1	5	0.771	0.771	1
IFT88	958	7828	36	8750	3	33	-0.12	-0.59	0.23	0.771	8.33	10.91	0.74	1	7	0.631	0.771	1
ALPI	1068	7815	63	8821	6	56	-0.11	-0.75	0.32	0.772	9.52	12.04	0.78	3	15	0.29	0.772	1
HSDL1	1774	7134	25	8883	4	21	-0.07	-0.35	0.18	0.772	16	19.93	0.77	3	2	0.0123	0.772	1
CCDC78	1322	6567	8	7881	1	7	0	-0.27	0.09	0.772	12.5	16.76	0.71	1	0	0.121	0.772	1
ACTG2	1045	7721	10	8756	2	8	0.11	-0.16	0.22	0.359	20	11.91	1.85	1	3	0.772	0.772	1
GIGYF2	1077	7832	42	8867	4	38	-0.11	-0.58	0.26	0.772	9.52	12.1	0.77	2	5	0.148	0.772	1
PLEKHG4B	1277	7109	10	8376	2	8	0.09	-0.18	0.18	0.459	20	15.22	1.39	1	3	0.772	0.772	1
ATOH7	1050	7848	11	8888	2	8	0.11	-0.16	0.22	0.322	18.18	11.79	1.87	1	3	0.772	0.772	1
ZNF543	1778	7128	13	8893	2	11	-0.07	-0.28	0.14	0.773	15.38	19.97	0.73	1	2	0.504	0.773	1
STT3A	1318	7569	21	8867	5	15	0.18	-0.13	0.45	0.178	23.81	14.81	1.91	1	3	0.773	0.773	1
TCEB2	1508	7400	8	8900	1	7	0	-0.24	0.08	0.774	12.5	16.93	0.7	1	0	0.121	0.774	1
MRO	1488	7283	8	8763	1	7	0	-0.24	0.08	0.776	12.5	16.97	0.7	1	1	0.34	0.776	1
CTRL	940	4925	14	5851	2	12	-0.13	-0.51	0.25	0.776	14.29	16.03	0.87	2	1	0.0369	0.776	1
C1QTNF2	1055	7610	23	8642	2	21	-0.11	-0.43	0.22	0.776	8.7	12.18	0.69	1	1	0.191	0.776	1
FRMPD1	1942	6840	13	8770	2	10	-0.07	-0.26	0.13	0.777	15.38	22.12	0.7	1	2	0.539	0.777	1
IFITM5	1488	7284	10	8762	3	7	0.08	-0.08	0.24	0.22	30	16.95	2.1	1	2	0.777	0.777	1
RNPEP	1219	7689	10	8898	3	7	0.19	-0.1	0.29	0.132	30	13.67	2.7	1	2	0.777	0.777	1
APEH	2546	6357	10	8893	3	7	0.06	-0.14	0.17	0.498	30	28.6	1.07	1	2	0.777	0.777	1
ACOX1	1114	7462	42	8535	4	37	-0.1	-0.57	0.26	0.778	9.52	13.01	0.72	4	6	0.00369	0.778	1
XRCC1	1105	7801	12	8894	1	11	0	-0.31	0.1	0.778	8.33	12.41	0.64	1	2	0.373	0.778	1
BOC	990	5778	10	6758	1	9	0	-0.35	0.12	0.779	10	14.63	0.65	1	3	0.578	0.779	1
CDKL1	1012	7467	24	8456	2	21	-0.11	-0.45	0.22	0.779	8.33	11.94	0.7	1	5	0.578	0.779	1
CATSPERG	1077	7597	12	8662	1	11	0	-0.32	0.11	0.78	8.33	12.42	0.64	1	3	0.498	0.78	1
SORL1	2013	6895	140	8770	28	110	-0.19	-0.87	0.39	0.78	20	22.63	0.87	12	24	0.0154	0.78	1
FSTL5	1090	7816	16	8891	5	10	0.31	0.05	0.52	0.0283	31.25	12.2	3.59	2	4	0.781	0.781	1
NOXO1	1273	7434	10	8697	1	9	0	-0.28	0.09	0.782	10	14.63	0.65	1	3	0.578	0.782	1
KIF5A	1099	7809	23	8885	2	21	-0.1	-0.42	0.21	0.783	8.7	12.35	0.68	1	2	0.304	0.783	1
FLG	1742	6500	102	8141	18	83	-0.15	-0.76	0.33	0.784	17.65	21.18	0.81	15	8	3.11e-12	0.784	1
QRICH2	1815	5035	13	6837	3	10	0	-0.26	0.19	0.687	23.08	26.5	0.83	1	3	0.784	0.784	1
LCAT	1023	7882	25	8880	2	23	-0.11	-0.44	0.22	0.784	8	11.5	0.67	1	2	0.281	0.784	1
SURF2	1289	6601	9	7882	1	7	0	-0.28	0.09	0.784	11.11	16.34	0.73	1	2	0.527	0.784	1
RCC2	1035	6729	11	7753	1	10	0	-0.33	0.11	0.784	9.09	13.34	0.65	1	1	0.254	0.784	1
PQLC2	1747	7134	13	8868	2	11	-0.07	-0.29	0.14	0.785	15.38	19.68	0.74	2	7	0.684	0.785	1
FLT4	1251	7563	20	8794	4	16	0.09	-0.23	0.37	0.34	20	14.18	1.51	1	4	0.785	0.785	1
WDHD1	944	7734	26	8652	7	19	0.59	0.12	0.83	0.0123	26.92	10.83	3.02	1	3	0.785	0.785	1
KRT10	2070	6838	20	8888	7	13	0.13	-0.09	0.38	0.169	35	23.21	1.78	2	4	0.785	0.785	1
PI4KA	1616	5564	12	7168	2	10	-0.08	-0.32	0.16	0.785	16.67	22.52	0.69	1	1	0.356	0.785	1
SYTL3	1235	7660	27	8868	5	22	0.09	-0.24	0.38	0.334	18.52	13.87	1.41	2	9	0.786	0.786	1
TIMELESS	1330	7578	18	8890	2	16	-0.09	-0.35	0.18	0.786	11.11	14.94	0.71	1	2	0.379	0.786	1
PLEKHG3	1026	5910	34	6902	4	30	-0.11	-0.63	0.29	0.786	11.76	14.81	0.77	2	8	0.418	0.786	1
PSMC5	1557	6607	15	8149	5	10	0.16	-0.08	0.4	0.131	33.33	19.05	2.12	1	2	0.787	0.787	1
FOXR1	894	4290	16	5168	2	14	-0.14	-0.54	0.27	0.788	12.5	17.26	0.69	2	1	0.028	0.788	1
NOD1	1123	7728	11	8840	1	10	0	-0.31	0.1	0.788	9.09	12.69	0.69	1	2	0.403	0.788	1
SLC6A7	1336	7573	28	8881	5	23	0.09	-0.26	0.35	0.415	17.86	14.99	1.23	1	5	0.79	0.79	1
CHL1	1156	7753	33	8877	3	29	-0.1	-0.5	0.2	0.791	9.09	12.99	0.69	2	8	0.319	0.791	1
RPA1	2452	6448	10	8890	2	8	-0.06	-0.2	0.11	0.792	20	27.56	0.66	1	1	0.421	0.792	1
DYNC2LI1	946	5897	11	6832	1	10	0	-0.37	0.12	0.793	9.09	13.83	0.62	1	3	0.535	0.793	1
TGM5	1020	5680	35	6665	4	31	-0.12	-0.64	0.29	0.794	11.43	15.24	0.72	1	4	0.531	0.794	1
MCM7	1772	7130	12	8890	2	10	0	-0.21	0.14	0.704	16.67	19.91	0.8	1	4	0.794	0.794	1
PDXDC1	1076	7327	12	8391	2	10	0.11	-0.21	0.21	0.484	16.67	12.8	1.36	1	4	0.794	0.794	1
TRPC4	1211	7680	22	8869	2	20	-0.1	-0.38	0.19	0.794	9.09	13.63	0.63	2	0	0.00167	0.794	1
SLC25A39	1260	6838	27	8071	4	23	0	-0.38	0.28	0.625	14.81	15.56	0.94	1	6	0.794	0.794	1
NLRX1	1949	6957	25	8882	4	20	-0.07	-0.36	0.16	0.795	16	21.9	0.71	3	5	0.116	0.795	1
RCVRN	2981	5750	8	8723	2	6	-0.05	-0.15	0.1	0.795	25	34.15	0.64	1	2	0.734	0.795	1
YME1L1	1107	7802	32	8878	7	24	0.31	-0.05	0.62	0.0753	21.88	12.39	2.06	1	4	0.796	0.796	1
SIX5	1057	7666	12	8711	1	11	0	-0.32	0.11	0.797	8.33	12.12	0.66	1	1	0.234	0.797	1
TJP3	1849	7054	25	8878	4	21	-0.07	-0.38	0.17	0.797	16	20.78	0.73	2	2	0.102	0.797	1
ZBTB40	1536	7369	16	8889	2	14	-0.08	-0.31	0.16	0.797	12.5	17.26	0.69	1	0	0.0967	0.797	1
KIAA1919	1005	7537	13	8529	1	12	0	-0.34	0.11	0.799	7.69	11.77	0.62	1	0	0.0754	0.799	1
SPTLC3	1235	7671	39	8867	4	35	-0.09	-0.56	0.24	0.8	10.26	13.88	0.71	4	12	0.0525	0.8	1
AIFM3	1562	7343	17	8889	2	14	-0.08	-0.31	0.16	0.8	11.76	17.55	0.67	1	4	0.657	0.8	1
MTHFD1L	1825	7084	7	8902	1	6	0	-0.21	0.07	0.8	14.29	20.49	0.65	1	2	0.587	0.8	1
ECE1	1118	5581	33	6667	4	28	-0.11	-0.59	0.27	0.8	12.12	16.71	0.71	4	5	0.00549	0.8	1
CELA2B	1933	6976	24	8885	4	20	-0.07	-0.36	0.17	0.801	16.67	21.71	0.72	1	4	0.701	0.801	1
ADAM18	1263	7394	17	8640	2	15	-0.09	-0.37	0.19	0.801	11.76	14.59	0.78	2	4	0.193	0.801	1
TSR1	3463	5445	8	8900	3	5	0	-0.14	0.09	0.668	37.5	38.88	0.94	2	3	0.801	0.801	1
MEGF10	1086	7769	23	8832	2	21	-0.1	-0.42	0.21	0.801	8.7	12.27	0.68	2	5	0.156	0.801	1
TFIP11	1607	7286	8	8885	1	7	0	-0.23	0.08	0.802	12.5	18.08	0.65	1	1	0.34	0.802	1
KLHDC8B	1495	7049	7	8537	2	5	0.08	-0.12	0.16	0.375	28.57	17.49	1.89	1	2	0.802	0.802	1
MFRP	2167	6741	23	8885	5	18	0	-0.3	0.18	0.675	21.74	24.33	0.86	1	4	0.802	0.802	1
PTER	986	7416	13	8389	1	12	0	-0.34	0.11	0.802	7.69	11.74	0.63	1	2	0.348	0.802	1
PLD1	896	5744	23	6617	5	18	0.26	-0.26	0.58	0.219	21.74	13.47	1.78	1	4	0.802	0.802	1
TRAPPC2L	1255	6021	7	7269	2	5	0.1	-0.14	0.19	0.352	28.57	17.24	1.92	1	2	0.802	0.802	1
NLRP9	1001	7905	19	8887	2	17	0	-0.34	0.23	0.679	10.53	11.24	0.93	1	7	0.802	0.802	1
RORC	929	7979	19	8889	2	17	0	-0.36	0.24	0.586	10.53	10.43	1.01	1	7	0.802	0.802	1
CCKBR	1480	7428	17	8891	2	15	-0.08	-0.32	0.16	0.802	11.76	16.62	0.67	2	0	0.00287	0.802	1
AMBN	895	5775	7	6663	2	5	0.13	-0.13	0.26	0.217	28.57	13.4	2.58	1	2	0.802	0.802	1
MCTP1	1538	7209	12	8735	4	8	0.16	-0.08	0.32	0.15	33.33	17.56	2.34	1	2	0.804	0.804	1
[truncated: 985 more rows]
