# Supplementary material for: Systematic discovery of germline cancer predisposition genes through the identification of somatic second hits
Source: Nat Commun. 2018 Jul 4;9:2601. doi: 10.1038/s41467-018-04900-7 (PMC6031629; doi:10.1038/s41467-018-04900-7)
Supplement: Supplementary file 6 — Supplementary Data 4 [file 41467_2018_4900_MOESM6_ESM.xlsx]

## Sheet: Sheet1
Supplementary Data 4. ALFRED analysis in 17 individual cancer types.
Cancer type	Gene	Num.of samples with AI	Num.of samples without AI	Num.of samples with RDGVs	Num.of samples without RDGVs	Num.of samples with RDGVs in AI	Num.of samples with RDGVs in noAI	Excess of RDGVs in AI samples compared with noAI samples (%)	Lower_95% CI	Upper_95% CI	Random_P	Samples with AI in RDGV samples (%)	Samples with AI in noRDGV samples (%)	Relative risk (RR)	Num.of samples with at least 10% increased VAF of RDGVs in AI samples	Num.of samples with at least 10% increased VAF of RDGVs in noAI samples	Binomial_P	ALFRED_P	FDR
BLCA	KCNH6	68	290	8	350	4	4	5.45	0	7.26	0.0379	50	18.29	4.26	4	1	0.0308	0.0379	1
BLCA	SACS	56	305	10	352	4	5	4.23	0	8.45	0.0634	40	14.77	4.36	3	0	0.00509	0.0634	1
BLCA	GJB4	31	290	5	316	2	3	3.57	0	7.14	0.125	40	9.18	6.24	2	0	0.043	0.125	1
BLCA	CACNA1S	103	258	14	347	7	7	4.08	0	8.15	0.0544	50	27.67	2.5	5	3	0.237	0.237	1
BLCA	ABCA9	48	313	7	354	2	5	2.4	-2.4	4.81	0.254	28.57	12.99	2.61	2	1	0.156	0.254	1
BLCA	COL5A2	50	311	8	353	3	5	4.64	0	6.96	0.0934	37.5	13.31	3.73	2	1	0.262	0.262	1
BLCA	LRP4	79	282	8	353	3	5	3.24	-1.62	4.86	0.183	37.5	21.53	2.14	2	1	0.262	0.262	1
BLCA	UNC13B	52	155	8	199	3	5	2.57	-2.57	7.7	0.264	37.5	24.62	1.79	3	0	0.00217	0.264	1
BLCA	ABCC12	36	325	7	354	4	3	9.26	3.09	12.34	0.00281	57.14	9.04	12.04	3	1	0.275	0.275	1
BLCA	ABCA12	123	238	6	355	3	3	1.23	-1.23	3.7	0.3	50	33.8	1.93	2	0	0.0789	0.3	1
BLCA	FBN2	99	262	12	349	4	8	1.39	-2.78	5.57	0.315	33.33	27.22	1.32	4	0	4.55e-05	0.315	1
BLCA	IQGAP3	65	296	5	356	2	3	1.88	-0.94	3.75	0.156	40	17.7	3.04	1	0	0.33	0.33	1
BLCA	SI	47	309	10	346	3	7	4.9	-2.45	7.35	0.159	30	12.72	2.82	2	2	0.37	0.37	1
BLCA	GLDC	101	247	8	340	3	5	1.39	-2.79	4.18	0.379	37.5	28.82	1.47	2	1	0.262	0.379	1
BLCA	FBN3	117	244	13	348	5	8	1.26	-3.16	5.06	0.391	38.46	32.18	1.3	2	1	0.263	0.391	1
BLCA	TSC2	49	200	11	238	3	8	2.54	-5.08	7.62	0.433	27.27	19.33	1.53	3	0	0.000657	0.433	1
BLCA	CACNA1D	90	269	10	349	3	7	1.48	-2.97	4.45	0.47	30	24.93	1.28	2	2	0.37	0.47	1
BLCA	NSD1	77	284	10	351	3	7	1.65	-3.3	4.95	0.471	30	21.08	1.58	2	1	0.162	0.471	1
BLCA	COL22A1	100	261	8	353	4	4	2.77	-1.38	5.53	0.155	50	27.2	2.61	2	1	0.472	0.472	1
BLCA	HAL	84	277	6	355	3	3	3.1	-0.78	4.65	0.141	50	22.82	3.3	2	1	0.481	0.481	1
BLCA	TNFRSF10A	105	256	5	356	2	3	1.34	-2.69	2.69	0.486	40	28.93	1.63	2	1	0.316	0.486	1
BLCA	FLG	82	256	5	333	1	4	1.61	-1.61	1.61	0.448	20	24.32	0.78	1	1	0.51	0.51	1
BLCA	ABCC3	48	312	5	355	1	4	2.4	-2.4	2.4	0.378	20	13.24	1.62	1	1	0.51	0.51	1
BLCA	MYH11	89	272	7	354	2	5	0	-2.98	2.98	0.523	28.57	24.58	1.22	2	0	0.0197	0.523	1
BLCA	COL11A1	77	284	8	353	2	6	0	-3.3	3.3	0.536	25	21.25	1.23	2	0	0.0146	0.536	1
BLCA	HK3	64	297	11	350	3	8	0	-3.8	4.75	0.536	27.27	17.43	1.74	2	1	0.132	0.536	1
BLCA	CHD2	57	302	5	354	1	4	0	-3.13	2.09	0.539	20	15.82	1.32	1	1	0.51	0.539	1
BLCA	MYH1	67	293	7	353	2	5	1.83	-2.75	3.67	0.393	28.57	18.41	1.75	1	1	0.578	0.578	1
BLCA	TNS1	155	206	9	352	4	5	0	-3.39	3.39	0.602	44.44	42.9	1.06	4	0	0.000225	0.602	1
BLCA	SLC26A9	40	190	6	224	1	5	0	-6.05	3.03	0.618	16.67	17.41	0.95	1	0	0.16	0.618	1
BLCA	ABCC2	72	289	10	351	2	8	1.73	-3.47	3.47	0.46	20	19.94	1	1	2	0.623	0.623	1
BLCA	ABCA1	150	211	7	354	3	4	0	-2.85	2.85	0.628	42.86	41.53	1.05	2	0	0.0523	0.628	1
BLCA	CAT	51	255	5	301	1	4	0	-4.71	2.35	0.629	20	16.61	1.25	1	1	0.51	0.629	1
BLCA	OLFM4	57	269	5	321	1	4	0	-4.25	2.13	0.639	20	17.45	1.18	1	1	0.51	0.639	1
BLCA	SCN10A	78	283	11	350	4	7	1.64	-3.27	6.54	0.283	36.36	21.14	2.07	1	1	0.646	0.646	1
BLCA	ACACB	82	279	6	355	2	4	1.58	-2.37	3.16	0.419	33.33	22.54	1.7	1	1	0.657	0.657	1
BLCA	HMCN1	77	284	6	355	2	4	1.65	-2.48	3.3	0.414	33.33	21.13	1.84	1	1	0.657	0.657	1
BLCA	MYO1C	147	214	5	356	2	3	0	-2.3	2.3	0.663	40	40.73	0.97	2	0	0.043	0.663	1
BLCA	F5	115	246	10	351	3	7	0	-3.83	2.55	0.684	30	31.91	0.92	2	1	0.162	0.684	1
BLCA	MYO1A	41	173	5	209	3	2	6.03	0	9.05	0.0485	60	18.18	6.33	2	1	0.688	0.688	1
BLCA	CHD6	42	269	8	303	1	7	0	-5.51	2.75	0.696	12.5	13.53	0.91	1	1	0.34	0.696	1
BLCA	RYR1	101	260	12	350	3	8	0	-4.81	2.75	0.726	25	28	0.97	2	1	0.132	0.726	1
BLCA	CP	53	308	8	353	2	6	2.21	-2.21	4.42	0.348	25	14.45	1.94	1	2	0.734	0.734	1
BLCA	AGMAT	56	234	6	284	1	5	0	-4.43	2.21	0.739	16.67	19.37	0.84	1	1	0.438	0.739	1
BLCA	MYO6	49	312	7	354	1	6	0	-4.72	2.36	0.655	14.29	13.56	1.06	1	3	0.75	0.75	1
BLCA	CLCNKB	70	291	5	356	2	3	1.77	-1.77	3.54	0.306	40	19.1	2.77	1	1	0.756	0.756	1
BLCA	APC	69	283	7	345	3	4	1.8	-1.8	5.41	0.268	42.86	19.13	3.08	1	1	0.76	0.76	1
BLCA	DYSF	80	281	13	348	2	11	0	-5.62	3.21	0.766	15.38	22.41	0.64	1	3	0.645	0.766	1
BLCA	HSD17B4	70	230	5	295	1	4	0	-3.73	1.86	0.771	20	23.39	0.82	1	1	0.51	0.771	1
BLCA	TG	117	244	7	354	2	5	0	-3.79	2.53	0.776	28.57	32.49	0.83	1	1	0.578	0.776	1
BLCA	SETX	108	253	8	353	2	6	0	-3.96	2.64	0.783	25	30.03	0.78	1	1	0.515	0.783	1
BLCA	FLNB	85	266	13	338	2	11	-1.55	-6.21	2.33	0.869	15.38	24.56	0.57	1	3	0.645	0.869	1
BLCA	ITPR3	90	271	6	355	2	4	0	-2.96	2.96	0.519	33.33	24.79	1.51	1	2	0.875	0.875	1
BLCA	COL7A1	64	295	8	351	2	6	1.9	-3.8	3.8	0.41	25	17.66	1.54	1	3	0.875	0.875	1
BLCA	LRP1	72	289	6	355	2	4	1.73	-1.73	3.47	0.303	33.33	19.72	2.01	1	2	0.875	0.875	1
BLCA	MYH2	69	183	9	243	5	4	3.99	-2	8.98	0.129	55.56	26.34	3.32	2	2	0.891	0.891	1
BLCA	ABCA4	81	280	9	352	1	8	-1.59	-6.37	1.59	0.931	11.11	22.73	0.43	1	1	0.306	0.931	1
BLCA	WDR11	68	248	5	311	3	2	3.75	0	5.62	0.0892	60	20.9	5.47	1	1	0.938	0.938	1
BLCA	NPC1	88	241	5	324	3	2	3.1	-0.78	4.65	0.138	60	26.23	4.11	1	1	0.938	0.938	1
BLCA	LRP1B	139	222	18	343	6	12	-1.17	-5.26	3.51	0.728	33.33	38.78	0.8	1	4	0.949	0.949	1
BLCA	MAN2B2	76	285	7	354	3	4	3.33	0	5	0.109	42.86	20.62	2.81	0	3	1	1	1
BLCA	MUT	51	305	8	348	1	7	0	-4.58	2.29	0.652	12.5	14.37	0.85	0	2	1	1	1
BLCA	MSH6	52	309	5	356	0	5	0	-4.49	0	1	0	14.61	0	0	2	1	1	1
BLCA	ALDH1L2	57	280	7	330	1	6	0	-4.22	2.11	0.703	14.29	16.97	0.82	0	3	1	1	1
BLCA	SERPINA1	42	229	5	266	0	5	-2.82	-8.45	0	1	0	15.79	0	0	2	1	1	1
BLCA	ATP13A4	42	309	7	344	1	6	0	-4.06	2.7	0.52	14.29	11.92	1.23	0	2	1	1	1
BLCA	PIK3C2B	66	295	6	355	2	4	1.85	-1.85	3.71	0.271	33.33	18.03	2.23	0	2	1	1	1
BLCA	DNAH2	210	151	5	356	3	2	0	-2.28	2.28	0.685	60	58.15	1.08	0	1	1	1	1
BLCA	ABCA7	87	274	8	353	1	7	-1.51	-4.54	1.51	0.862	12.5	24.36	0.45	0	2	1	1	1
BLCA	ABCA5	53	308	6	355	1	5	0	-4.42	2.21	0.584	16.67	14.65	1.16	0	2	1	1	1
BRCA	BRCA2	261	643	28	877	16	11	4.31	1.89	6.73	0.000686	57.14	27.94	3.58	12	3	0.000493	0.000686	0.086436
BRCA	BRCA1	213	558	37	734	18	19	5.19	1.95	8.43	0.00275	48.65	26.57	2.48	15	7	0.000281	0.00275	0.14532
BRCA	ATM	243	660	23	880	12	11	3.38	1.13	5.63	0.00346	52.17	26.25	2.96	10	3	0.000507	0.00346	0.14532
BRCA	THBS4	106	602	15	694	6	8	4.44	1.11	6.66	0.014	40	14.41	4.26	6	3	0.0161	0.0161	0.50715
BRCA	MYH8	285	619	19	886	9	9	2.05	0	3.59	0.0453	47.37	31.15	2.17	5	1	0.00987	0.0453	1
BRCA	MYO9A	128	776	27	878	7	19	3.64	0	5.92	0.0441	25.93	13.78	2.23	3	2	0.0673	0.0673	1
BRCA	MYH3	315	564	18	861	10	8	1.48	-0.49	3.46	0.0977	55.56	35.42	2.24	7	1	0.000629	0.0977	1
BRCA	SACS	237	667	24	881	10	13	1.72	-0.57	4	0.104	41.67	25.77	2.16	4	1	0.0234	0.104	1
BRCA	COL6A2	139	742	11	870	5	6	2.56	0.85	4.27	0.014	45.45	15.4	4.45	3	1	0.117	0.117	1
BRCA	CATSPER1	164	740	16	888	5	11	1.49	-0.74	3.72	0.144	31.25	17.91	2.05	3	2	0.109	0.144	1
BRCA	FBN2	207	690	22	875	8	14	1.88	-0.94	3.77	0.147	36.36	22.74	1.9	5	2	0.00895	0.147	1
BRCA	COL7A1	179	717	27	869	8	19	2.09	-1.05	4.19	0.159	29.63	19.68	1.69	5	3	0.0111	0.159	1
BRCA	RANBP17	91	752	8	835	4	4	3.7	0	4.93	0.0315	50	10.42	8.26	3	1	0.163	0.163	1
BRCA	FANCA	460	376	9	828	6	2	0.97	-0.48	2.18	0.163	66.67	54.83	2.45	4	0	0.0176	0.163	1
BRCA	POSTN	208	600	8	800	4	4	1.29	-0.65	2.59	0.168	50	25.5	2.88	3	1	0.163	0.168	1
BRCA	AGL	175	693	11	857	4	7	1.43	-0.72	2.86	0.176	36.36	19.95	2.26	4	2	0.0358	0.176	1
BRCA	MYH6	241	657	14	884	7	7	1.7	0	3.4	0.0596	50	26.47	2.73	3	1	0.176	0.176	1
BRCA	TSC2	126	504	23	607	7	16	1.98	-1.98	5.46	0.187	30.43	19.6	1.75	4	3	0.0618	0.187	1
BRCA	COL11A1	203	701	14	890	5	9	1.27	-0.95	2.86	0.199	35.71	22.25	1.92	3	1	0.0473	0.199	1
BRCA	TPP1	281	623	10	894	5	5	1.03	-0.52	2.07	0.212	50	30.87	2.22	4	2	0.203	0.212	1
BRCA	MYH1	169	721	19	871	8	11	3.65	0.73	5.48	0.00849	42.11	18.48	3.1	5	4	0.217	0.217	1
BRCA	TPCN2	174	730	12	892	5	7	2.14	0	3.56	0.0389	41.67	18.95	3	4	3	0.235	0.235	1
BRCA	HMCN1	222	678	17	883	6	11	1.2	-1.2	2.99	0.245	35.29	24.46	1.67	4	2	0.0383	0.245	1
BRCA	DNAH3	205	699	12	892	4	8	0.63	-0.95	2.52	0.251	33.33	22.53	1.7	3	1	0.0355	0.251	1
BRCA	TDRD3	95	374	9	460	5	4	5.28	1.32	6.6	0.0101	55.56	19.57	4.92	3	1	0.256	0.256	1
BRCA	KCNH4	154	451	9	596	5	4	1.74	0	4.36	0.083	55.56	25	3.66	3	1	0.256	0.256	1
BRCA	FANCM	99	394	9	484	5	4	3.79	1.26	6.32	0.016	55.56	19.42	4.97	3	1	0.256	0.256	1
BRCA	GALNS	262	616	7	871	3	4	0.54	-0.54	1.63	0.288	42.86	29.74	1.76	3	0	0.0037	0.288	1
BRCA	DUOX1	200	704	10	894	4	6	1.28	-0.64	2.57	0.144	40	21.92	2.35	2	1	0.292	0.292	1
BRCA	THBS3	207	693	12	888	4	8	0.63	-1.25	2.51	0.283	33.33	22.86	1.67	3	3	0.298	0.298	1
BRCA	MYH4	265	407	15	657	8	7	1.25	-1.25	3.12	0.252	53.33	39.12	1.76	4	2	0.299	0.299	1
BRCA	SLC5A10	259	610	7	862	3	4	0.55	-0.55	1.65	0.297	42.86	29.7	1.77	2	1	0.348	0.348	1
BRCA	HNF1B	197	707	7	897	3	4	1.3	-0.65	1.95	0.145	42.86	21.63	2.69	2	1	0.348	0.348	1
BRCA	ABCC11	298	459	16	742	7	8	0.55	-1.38	2.77	0.352	43.75	39.22	1.35	4	1	0.0307	0.352	1
BRCA	SCN10A	215	689	37	868	10	26	0.61	-2.44	3.66	0.356	27.03	23.62	1.23	7	6	0.00605	0.356	1
BRCA	DST	116	788	23	881	7	16	3.96	0.99	6.92	0.0162	30.43	12.37	2.97	3	4	0.358	0.358	1
BRCA	PHF12	113	414	10	517	3	7	1.13	-1.69	3.38	0.289	30	21.28	1.57	2	2	0.37	0.37	1
BRCA	UPB1	90	664	7	747	2	5	1.26	-1.26	2.52	0.176	28.57	11.78	2.95	2	2	0.376	0.376	1
BRCA	OTOF	135	768	14	890	3	10	0.87	-1.74	2.61	0.336	21.43	14.83	1.71	2	3	0.38	0.38	1
BRCA	CHST4	112	400	10	502	3	7	1.14	-2.29	3.43	0.384	30	21.71	1.53	3	1	0.0227	0.384	1
BRCA	ABCC12	249	655	18	886	6	12	0.55	-1.66	2.22	0.403	33.33	27.43	1.32	3	2	0.135	0.403	1
BRCA	TNFRSF13B	215	687	6	896	2	4	0.61	-0.92	1.22	0.405	33.33	23.77	1.6	2	1	0.216	0.405	1
BRCA	ABCA6	232	672	14	890	4	10	0.58	-1.45	2.03	0.435	28.57	25.62	1.16	2	2	0.319	0.435	1
BRCA	VPS4B	86	621	10	697	2	8	1.32	-2.65	2.65	0.436	20	12.05	1.81	2	2	0.189	0.436	1
BRCA	ATP13A5	181	723	12	892	3	9	0.69	-1.38	2.07	0.418	25	19.96	1.33	2	3	0.437	0.437	1
BRCA	DYSF	139	765	16	888	3	13	0.85	-2.13	2.55	0.475	18.75	15.32	1.27	2	3	0.262	0.475	1
BRCA	LRP2	243	661	39	865	11	28	0.56	-2.81	3.1	0.492	28.21	26.82	1.07	4	7	0.378	0.492	1
BRCA	CACNA1D	260	634	16	878	6	10	1.08	-1.08	2.71	0.257	37.5	28.93	1.46	2	2	0.497	0.497	1
BRCA	MYH10	326	578	13	891	5	8	0.48	-1.44	1.68	0.5	38.46	36.03	1.11	4	3	0.164	0.5	1
BRCA	ATP8B4	165	739	17	888	3	13	0	-2.22	2.22	0.51	17.65	18.24	1.03	2	2	0.149	0.51	1
BRCA	CES5A	352	552	9	895	6	3	1.4	-0.23	2.33	0.0851	66.67	38.66	3.14	3	1	0.525	0.525	1
BRCA	FBN3	269	635	21	883	9	12	1.59	-0.53	3.7	0.123	42.86	29.45	1.77	3	3	0.531	0.531	1
BRCA	HKDC1	173	731	12	892	5	7	2.14	0	3.57	0.0516	41.67	18.83	3.02	3	3	0.533	0.533	1
BRCA	MPO	265	551	8	808	3	5	0.56	-1.12	1.68	0.428	37.5	32.43	1.25	2	2	0.553	0.553	1
BRCA	KRT15	286	618	8	896	3	5	0	-1.28	1.53	0.561	37.5	31.58	1.3	3	2	0.199	0.561	1
BRCA	TYR	165	632	19	778	6	13	2.29	-0.76	3.82	0.128	31.58	20.44	1.77	3	5	0.564	0.564	1
BRCA	MLH3	173	731	7	897	2	5	0.71	-0.71	1.43	0.33	28.57	19.06	1.69	1	1	0.578	0.578	1
BRCA	RYR1	204	700	30	874	10	20	2.53	-0.63	5.06	0.0812	33.33	22.2	1.72	3	5	0.581	0.581	1
BRCA	COL4A1	372	532	15	890	9	5	1.37	0	3.2	0.0539	60	40.79	2.57	6	3	0.591	0.591	1
BRCA	SRCAP	89	815	19	886	2	16	0	-3.74	2.49	0.594	10.53	9.82	1.14	2	2	0.0585	0.594	1
BRCA	CFTR	91	669	31	730	4	26	1.25	-3.75	4.37	0.439	12.9	11.92	1.13	1	4	0.598	0.598	1
BRCA	MASP1	106	797	10	893	2	8	1.07	-1.07	2.14	0.315	20	11.65	1.88	1	2	0.623	0.623	1
BRCA	MYH2	217	415	9	623	7	2	2.81	0.7	4.21	0.0151	77.78	33.71	6.69	4	1	0.637	0.637	1
BRCA	ATP2B4	152	742	10	884	2	8	0	-2.38	1.59	0.639	20	16.97	1.22	1	1	0.421	0.639	1
BRCA	HK3	136	757	24	869	6	18	1.73	-1.73	4.34	0.24	25	14.96	1.86	2	5	0.648	0.648	1
BRCA	ACADSB	88	454	6	536	1	5	0	-2.71	1.36	0.651	16.67	16.23	1.03	1	2	0.66	0.66	1
BRCA	ABCC8	182	721	18	886	3	14	0	-2.41	1.72	0.667	16.67	20.2	0.85	2	4	0.348	0.667	1
BRCA	ABCA4	277	627	21	883	6	15	-0.52	-2.6	1.56	0.686	28.57	30.69	0.91	3	2	0.0817	0.686	1
BRCA	WFS1	165	701	11	855	2	9	0	-2.25	1.5	0.695	18.18	19.06	0.94	2	2	0.156	0.695	1
BRCA	CORIN	144	759	13	890	2	11	0	-2.48	1.65	0.711	15.38	15.96	0.96	2	2	0.112	0.711	1
BRCA	DISP1	190	714	16	888	3	13	0	-2.67	1.33	0.711	18.75	21.06	0.87	2	2	0.149	0.711	1
BRCA	GPT	130	758	7	881	4	3	2.7	0.9	3.6	0.0161	57.14	14.3	7.77	3	2	0.725	0.725	1
BRCA	CRB1	119	785	12	892	1	11	0	-2.9	0.97	0.764	8.33	13.23	0.6	1	3	0.498	0.764	1
BRCA	ATP1A4	321	583	15	889	6	9	0.48	-1.45	1.93	0.406	40	35.43	1.21	2	3	0.766	0.766	1
BRCA	ITGB4	215	689	16	888	3	13	-0.61	-2.44	1.22	0.775	18.75	23.87	0.74	2	5	0.512	0.775	1
BRCA	ATP12A	213	665	13	865	3	10	0	-1.86	1.86	0.591	23.08	24.28	0.94	1	3	0.784	0.784	1
BRCA	LBR	134	759	12	881	2	10	0.88	-1.76	1.76	0.486	16.67	14.98	1.13	1	4	0.794	0.794	1
BRCA	MYO3A	166	678	12	832	2	10	0	-2.25	1.5	0.737	16.67	19.71	0.82	1	4	0.794	0.794	1
BRCA	IGHMBP2	160	712	9	864	3	5	1.53	-0.77	2.3	0.196	33.33	18.17	2.67	2	3	0.801	0.801	1
BRCA	EXTL1	204	694	8	890	3	5	0.63	-0.63	1.9	0.214	37.5	22.58	2.04	2	3	0.801	0.801	1
BRCA	SI	147	756	23	880	5	18	0.81	-2.03	3.25	0.31	21.74	16.14	1.43	1	4	0.802	0.802	1
BRCA	PCCA	183	716	8	891	4	4	1.37	-0.34	2.74	0.112	50	20.09	3.91	2	2	0.812	0.812	1
BRCA	CACNA1S	317	586	26	877	8	18	-0.97	-3.16	1.46	0.812	30.77	35.23	0.82	2	5	0.785	0.812	1
BRCA	MYH7	161	716	18	860	2	15	-0.76	-3.04	1.52	0.818	11.11	18.49	0.59	1	4	0.629	0.818	1
BRCA	ABCC4	318	586	12	892	5	7	0.49	-0.97	1.94	0.323	41.67	35.09	1.32	2	3	0.821	0.821	1
BRCA	ABCA3	92	802	9	885	2	7	1.21	-1.21	2.42	0.264	22.22	10.17	2.49	1	3	0.822	0.822	1
BRCA	ENPP7	131	620	6	745	1	5	0	-1.85	0.92	0.727	16.67	17.45	0.95	1	3	0.826	0.826	1
BRCA	ACACB	226	678	19	885	6	13	0.59	-1.77	2.65	0.365	31.58	24.86	1.38	2	5	0.832	0.832	1
BRCA	GNPTAB	102	638	11	729	2	9	0	-2.84	2.27	0.568	18.18	13.72	1.39	1	4	0.834	0.834	1
BRCA	CPT1B	163	718	12	870	2	9	0	-2.26	1.51	0.624	16.67	18.51	0.98	1	4	0.834	0.834	1
BRCA	KCNH1	164	709	9	864	1	8	-0.75	-2.25	0.75	0.837	11.11	18.87	0.54	1	3	0.627	0.837	1
BRCA	MYO16	270	634	6	898	3	3	0.53	-0.53	1.58	0.314	50	29.73	2.35	2	2	0.848	0.848	1
BRCA	ALDOC	212	647	6	853	3	3	1.25	-0.63	1.88	0.173	50	24.5	3.05	2	2	0.848	0.848	1
BRCA	PARK2	179	724	8	895	1	7	-0.7	-2.09	0.7	0.849	12.5	19.89	0.58	1	4	0.809	0.849	1
BRCA	LRP1	150	754	28	876	3	25	-0.8	-4.4	1.6	0.85	10.71	16.78	0.6	2	2	0.0486	0.85	1
BRCA	POLG	194	563	13	744	2	11	-0.69	-2.77	1.04	0.851	15.38	25.81	0.53	1	2	0.504	0.851	1
BRCA	H6PD	121	647	12	756	1	11	-0.98	-3.43	0.98	0.869	8.33	15.87	0.49	1	3	0.498	0.869	1
BRCA	ITPR3	217	687	13	891	2	11	-0.61	-2.73	0.91	0.871	15.38	24.13	0.58	1	4	0.756	0.871	1
BRCA	APC	121	741	25	837	2	23	-0.96	-4.81	1.44	0.888	8	14.22	0.53	1	6	0.612	0.888	1
BRCA	PTCH2	144	544	10	678	1	9	-0.88	-3.51	0.88	0.902	10	21.09	0.42	1	3	0.578	0.902	1
BRCA	PTCH1	107	551	14	644	1	13	-1.12	-4.46	1.12	0.903	7.14	16.46	0.4	1	3	0.438	0.903	1
BRCA	LRP4	119	784	18	885	1	17	-0.97	-3.87	0.97	0.91	5.56	13.33	0.39	1	3	0.351	0.91	1
BRCA	KCNH6	274	623	20	877	4	16	-1.05	-3.15	0.79	0.914	20	30.79	0.57	2	6	0.632	0.914	1
BRCA	TG	312	592	9	895	2	7	-0.49	-1.96	0.73	0.843	22.22	34.64	0.54	1	4	0.916	0.916	1
BRCA	CAPN2	214	690	10	894	1	9	-0.61	-2.45	0.61	0.92	10	23.83	0.36	1	3	0.578	0.92	1
BRCA	MYO1C	332	572	7	897	2	5	-0.48	-1.43	0.71	0.834	28.57	36.79	0.69	1	3	0.928	0.928	1
BRCA	ACADVL	355	470	7	818	4	3	0.49	-0.49	1.73	0.28	57.14	42.91	1.77	2	2	0.931	0.931	1
BRCA	FLNB	238	621	25	834	6	19	-0.58	-2.91	1.74	0.725	24	27.82	0.82	1	6	0.936	0.936	1
BRCA	ARSB	172	704	9	867	3	6	0.72	-0.72	2.17	0.26	33.33	19.49	2.05	1	3	0.938	0.938	1
BRCA	ABCA7	267	637	13	891	4	9	0.53	-1.33	1.86	0.42	30.77	29.52	1.06	1	4	0.95	0.95	1
BRCA	COL5A1	282	622	19	885	3	16	-1.55	-3.61	0.52	0.958	15.79	31.53	0.41	2	4	0.287	0.958	1
BRCA	MTMR4	254	650	15	889	2	13	-1.1	-3.29	0.55	0.964	13.33	28.35	0.39	1	3	0.578	0.964	1
BRCA	MLC1	255	649	10	894	7	3	2.18	0.55	3.55	0.00894	70	27.74	5.94	3	2	0.964	0.964	1
BRCA	FH	97	576	6	667	2	4	1.2	-1.2	2.41	0.206	33.33	14.24	2.97	1	3	0.973	0.973	1
BRCA	ATP13A2	187	716	7	896	2	5	0.67	-1.01	1.35	0.369	28.57	20.65	1.53	2	5	0.98	0.98	1
BRCA	ITGB3	180	411	8	583	1	7	-1.6	-3.99	0	0.988	12.5	30.7	0.33	1	3	0.684	0.988	1
BRCA	F5	324	580	22	882	3	19	-2.41	-4.33	-0.24	0.995	13.64	36.39	0.28	1	5	0.724	0.995	1
BRCA	APLP1	128	776	7	897	1	6	0	-1.82	0.91	0.668	14.29	14.16	1.01	0	4	1	1	1
BRCA	VLDLR	121	418	8	531	1	7	-1.07	-3.73	1.07	0.896	12.5	22.6	0.49	0	1	1	1	1
BRCA	CNGA4	164	739	9	894	0	9	-1.49	-2.98	0	1	0	18.34	0	0	4	1	1	1
BRCA	SLC3A1	85	801	10	876	1	9	0	-2.6	1.3	0.675	10	9.59	1.05	0	5	1	1	1
BRCA	ABCA9	193	711	16	889	1	14	-1.32	-3.29	0.66	0.966	6.25	21.6	0.26	0	5	1	1	1
BRCA	ERCC6	111	780	10	881	0	10	-1.03	-3.6	0	1	0	12.6	0	0	3	1	1	1
BRCA	INPPL1	97	376	8	465	0	8	-2.59	-5.19	0	1	0	20.86	0	0	4	1	1	1
BRCA	ANK2	142	762	17	887	2	15	0	-2.51	1.67	0.709	11.76	15.78	0.72	0	5	1	1	1
BRCA	ABCC6	150	754	9	895	2	7	0.8	-1.6	1.6	0.423	22.22	16.54	1.44	0	3	1	1	1
CESC	FBN3	71	166	3	234	2	1	2.01	-1.01	4.02	0.191	66.67	29.49	4.68	2	0	0.156	0.191	1
CESC	ITPR3	107	130	6	231	4	2	1.7	-1.7	5.11	0.315	66.67	44.59	2.43	3	0	0.0355	0.315	1
CESC	MYH2	30	141	7	164	2	5	4.04	-4.04	8.09	0.35	28.57	17.07	1.88	2	1	0.156	0.35	1
CESC	H6PD	29	183	5	208	2	2	3.99	0	7.99	0.126	40	12.98	6.31	2	1	0.5	0.5	1
CESC	MYH8	29	208	5	232	1	4	0	-3.93	3.93	0.502	20	12.07	1.79	1	1	0.51	0.51	1
CESC	SACS	46	191	11	226	2	9	0	-5.39	5.39	0.554	18.18	19.47	0.92	2	2	0.156	0.554	1
CESC	RYR1	58	179	7	230	2	5	0	-4.57	4.57	0.564	28.57	24.35	1.23	2	1	0.156	0.564	1
CESC	LRP1B	67	170	7	230	2	5	0	-5.2	4.16	0.66	28.57	28.26	1.01	2	2	0.376	0.66	1
CESC	USH2A	80	157	8	229	5	3	5.66	0	9.43	0.0628	62.5	32.75	3.27	2	1	0.726	0.726	1
CESC	CFTR	25	170	15	180	2	13	0	-13.76	4.59	0.794	13.33	12.78	1.05	1	3	0.578	0.794	1
CESC	EIF2B5	68	169	3	234	2	1	2.06	-2.06	4.12	0.261	66.67	28.21	4.97	2	1	0.844	0.844	1
CESC	CATSPER3	50	184	3	231	2	1	2.54	0	5.09	0.163	66.67	20.78	7.36	2	1	0.844	0.844	1
CESC	FBN2	58	176	6	228	2	4	2.29	-2.29	4.58	0.388	33.33	24.56	1.52	1	2	0.875	0.875	1
CESC	SCN10A	86	151	17	220	8	9	3.65	-3.65	9.13	0.252	47.06	35.45	1.56	2	4	0.961	0.961	1
CESC	SYNJ2	59	170	4	225	2	2	2.28	-2.28	4.57	0.263	50	25.33	2.88	1	2	0.995	0.995	1
CESC	MYH3	57	174	6	225	1	5	-2.33	-6.99	2.33	0.876	16.67	24.89	0.61	0	2	1	1	1
CESC	AGL	46	186	7	225	0	7	-2.71	-9.49	0	1	0	20.44	0	0	5	1	1	1
CESC	HCN3	30	206	5	231	0	5	0	-7.64	0	1	0	12.99	0	0	3	1	1	1
CESC	SLC5A11	22	215	7	230	1	6	5.01	-5.01	5.01	0.499	14.29	9.13	1.63	0	3	1	1	1
CESC	ATP2B4	22	213	3	232	0	3	0	-5.01	0	1	0	9.48	0	0	2	1	1	1
COADREAD	COL14A1	129	317	6	440	4	2	2.18	0	4.36	0.0543	66.67	28.41	4.91	3	0	0.0355	0.0543	1
COADREAD	GLDC	56	368	7	417	3	4	4.11	0	6.17	0.0565	42.86	12.71	4.93	2	0	0.0523	0.0565	1
COADREAD	ABCA10	71	378	7	442	3	4	3.35	0	5.02	0.076	42.86	15.38	3.99	2	0	0.0523	0.076	1
COADREAD	AIRE	65	312	6	371	3	3	3.72	0	5.58	0.0707	50	16.71	4.8	2	0	0.0789	0.0789	1
COADREAD	CTSB	156	294	7	444	4	2	1.96	0	3.92	0.0903	57.14	34.23	3.77	3	0	0.0355	0.0903	1
COADREAD	HAL	106	344	8	443	4	3	2.47	0	4.94	0.0925	50	23.02	4.33	3	0	0.0161	0.0925	1
COADREAD	DST	54	396	14	436	4	10	4.21	-2.1	8.42	0.111	28.57	11.47	2.93	4	3	0.0382	0.111	1
COADREAD	COL6A3	101	342	12	432	4	7	2.56	-1.28	5.13	0.124	33.33	22.45	1.93	3	0	0.00222	0.124	1
COADREAD	MYH7	100	336	7	429	3	4	2.6	-1.3	3.89	0.149	42.86	22.61	2.52	2	0	0.0523	0.149	1
COADREAD	NLRP12	54	393	6	441	2	4	2.11	-1.05	4.21	0.172	33.33	11.79	3.64	2	0	0.028	0.172	1
COADREAD	MYH1	88	354	12	430	4	8	2.84	-1.42	5.68	0.184	33.33	19.53	2.01	3	1	0.0355	0.184	1
COADREAD	ABCC4	114	336	6	444	4	2	3.52	0.59	4.7	0.0279	66.67	24.77	5.89	2	0	0.196	0.196	1
COADREAD	LRP1B	120	330	16	435	6	9	2.27	-1.7	5.68	0.209	37.5	26.21	1.83	3	1	0.0738	0.209	1
COADREAD	HK2	47	373	6	414	2	4	4.79	0	4.79	0.123	33.33	10.87	3.97	2	1	0.216	0.216	1
COADREAD	CACNA1S	79	371	17	436	5	9	4.61	0	7.68	0.0534	29.41	16.97	2.61	4	4	0.255	0.255	1
COADREAD	ANKRD12	111	310	7	414	5	2	3.67	1.22	6.12	0.0122	71.43	25.6	6.98	2	0	0.263	0.263	1
COADREAD	SLC7A2	108	338	8	438	3	5	1.22	-1.83	3.67	0.291	37.5	23.97	1.88	2	1	0.262	0.291	1
COADREAD	RYR1	107	341	24	427	6	15	1.23	-2.46	6.14	0.298	25	23.65	1.27	3	4	0.311	0.311	1
COADREAD	SLC26A2	95	355	9	441	3	6	1.33	-2	4	0.318	33.33	20.86	1.87	2	1	0.203	0.318	1
COADREAD	XDH	83	367	6	444	2	4	1.48	-1.48	2.95	0.341	33.33	18.24	2.21	2	1	0.216	0.341	1
COADREAD	ATP8B4	89	361	6	444	2	4	1.4	-1.4	2.8	0.362	33.33	19.59	2.03	2	1	0.216	0.362	1
COADREAD	FBN2	159	289	14	437	7	4	2.92	0	5.85	0.0538	50	34.78	3.18	3	1	0.448	0.448	1
COADREAD	ACADVL	177	234	7	405	4	2	1.98	-0.99	3.97	0.19	57.14	42.72	2.64	3	1	0.5	0.5	1
COADREAD	SCN10A	84	366	15	436	3	11	0	-3.66	4.39	0.504	20	18.58	1.19	2	2	0.194	0.504	1
COADREAD	FER1L6	92	356	13	437	3	8	1.37	-2.05	4.1	0.317	23.08	20.37	1.45	1	1	0.518	0.518	1
COADREAD	ABCA9	65	384	6	443	1	5	0	-3.6	1.8	0.576	16.67	14.45	1.18	1	1	0.438	0.576	1
COADREAD	THBS3	55	392	7	440	2	5	2.07	-2.07	4.15	0.172	28.57	12.05	2.85	1	1	0.578	0.578	1
COADREAD	F5	87	363	7	443	2	5	1.42	-2.14	2.85	0.407	28.57	19.19	1.67	1	1	0.578	0.578	1
COADREAD	CNGA4	65	385	6	444	1	5	0	-3.6	1.8	0.618	16.67	14.41	1.18	1	0	0.16	0.618	1
COADREAD	ABCA12	77	373	7	443	4	3	4.7	1.57	6.27	0.0161	57.14	16.48	6.46	2	1	0.619	0.619	1
COADREAD	PKHD1	129	321	8	443	4	3	2.17	-1.09	4.35	0.143	50	28.22	3.32	2	1	0.619	0.619	1
COADREAD	CSF2RA	115	332	6	441	2	4	1.17	-1.76	2.34	0.403	33.33	25.62	1.44	1	1	0.657	0.657	1
COADREAD	MUT	60	390	6	444	1	5	0	-2.88	1.92	0.558	16.67	13.29	1.3	1	2	0.66	0.66	1
COADREAD	SLC4A5	52	357	6	403	1	5	2.2	-2.2	2.2	0.488	16.67	12.66	1.37	1	2	0.66	0.66	1
COADREAD	ADSL	48	206	6	248	1	5	0	-5.14	2.57	0.644	16.67	18.95	0.86	1	2	0.66	0.66	1
COADREAD	MYH4	122	219	10	331	4	6	0	-3.83	3.19	0.667	40	35.65	1.2	3	0	0.00327	0.667	1
COADREAD	CPT2	67	349	9	408	3	5	3.56	-1.78	5.34	0.159	33.33	15.69	3.13	1	1	0.684	0.684	1
COADREAD	ITGB4	89	358	10	437	2	8	0	-4.21	2.81	0.71	20	19.91	1.01	1	2	0.623	0.71	1
COADREAD	APC	102	328	12	418	2	10	0	-3.86	2.57	0.73	16.67	23.92	0.64	2	1	0.0507	0.73	1
COADREAD	ABCA6	95	354	9	441	2	6	1.34	-2.67	2.67	0.462	22.22	21.09	1.24	1	2	0.734	0.734	1
COADREAD	SCN11A	53	397	9	443	1	6	0	-4.28	2.14	0.583	11.11	11.74	1.25	1	3	0.75	0.75	1
COADREAD	TNC	95	355	7	443	1	6	0	-3.34	1.33	0.767	14.29	21.22	0.62	1	2	0.587	0.767	1
COADREAD	LRP2	118	332	20	431	4	15	-1.15	-5.74	2.87	0.778	20	26.45	0.75	2	1	0.0725	0.778	1
COADREAD	KCNH6	84	364	12	436	2	10	-1.47	-5.13	2.93	0.793	16.67	18.81	0.87	2	3	0.239	0.793	1
COADREAD	SLIT3	175	275	7	444	4	2	0.94	-0.94	3.27	0.263	57.14	38.51	3.14	2	1	0.812	0.812	1
COADREAD	ABCA4	112	338	10	441	2	7	-1.19	-3.57	2.38	0.819	20	24.94	0.86	1	1	0.464	0.819	1
COADREAD	NPC1	156	259	6	409	5	1	3.08	1.03	5.14	0.017	83.33	36.92	8.3	4	1	0.831	0.831	1
COADREAD	PYGB	122	325	9	439	4	4	2.25	-1.13	4.51	0.178	44.44	26.88	2.66	1	1	0.832	0.832	1
COADREAD	MTMR7	125	325	6	444	3	3	1.11	-1.11	3.32	0.217	50	27.48	2.6	1	1	0.847	0.847	1
COADREAD	ABCA1	65	382	12	435	1	11	-1.8	-5.4	1.8	0.847	8.33	14.71	0.53	1	2	0.373	0.847	1
COADREAD	ACACB	130	320	10	440	2	8	-1.08	-4.33	1.62	0.865	20	29.09	0.62	1	2	0.623	0.865	1
COADREAD	FLNB	92	329	17	405	2	14	-1.39	-6.26	2.09	0.88	11.76	22.22	0.51	1	2	0.421	0.88	1
COADREAD	COL4A1	157	293	10	440	3	7	-0.98	-3.91	1.96	0.794	30	35	0.8	1	3	0.9	0.9	1
COADREAD	MYH8	164	286	8	442	6	2	2.88	0.48	5.28	0.0217	75	35.75	5.23	2	1	0.938	0.938	1
COADREAD	SACS	83	367	13	437	1	12	-1.48	-6.65	1.48	0.943	7.69	18.76	0.37	1	4	0.572	0.943	1
COADREAD	MYH6	132	316	9	439	1	8	-1.07	-4.3	1.07	0.949	11.11	29.84	0.3	1	3	0.627	0.949	1
COADREAD	CDAN1	66	188	7	248	2	4	2.05	-3.07	4.09	0.422	28.57	25.81	1.42	1	3	0.973	0.973	1
COADREAD	FLCN	153	282	8	427	3	5	0	-2.52	3.02	0.557	37.5	35.13	1.11	1	4	0.996	0.996	1
COADREAD	MSH6	66	384	7	443	1	6	0	-3.55	1.78	0.64	14.29	14.67	0.97	0	1	1	1	1
COADREAD	EP400	47	303	11	339	1	10	0	-7.37	2.46	0.82	9.09	13.57	0.64	0	5	1	1	1
COADREAD	SERPINA1	56	292	6	342	1	5	0	-4.26	2.13	0.698	16.67	16.08	1.04	0	2	1	1	1
COADREAD	HKDC1	72	378	7	443	1	6	0	-3.31	1.65	0.722	14.29	16.03	0.88	0	2	1	1	1
COADREAD	CAPN2	55	395	8	442	1	7	0	-4.14	2.07	0.595	12.5	12.22	1.03	0	2	1	1	1
COADREAD	SYNJ2	71	375	6	440	0	6	-1.68	-5.03	0	1	0	16.14	0	0	2	1	1	1
COADREAD	COL7A1	53	387	18	425	2	13	0	-5.36	4.29	0.584	11.11	12	1.12	0	3	1	1	1
COADREAD	HK3	79	362	18	425	2	14	0	-5.4	3.08	0.761	11.11	18.12	0.65	0	5	1	1	1
COADREAD	FBN1	67	383	9	441	1	8	0	-5.26	1.75	0.816	11.11	14.97	0.71	0	2	1	1	1
COADREAD	COL5A3	127	323	12	440	2	8	-1.1	-4.39	2.19	0.823	16.67	28.41	0.64	0	2	1	1	1
COADREAD	COL5A1	101	349	9	442	1	7	-1.28	-4.47	1.28	0.89	11.11	22.62	0.49	0	2	1	1	1
COADREAD	ITPR3	123	327	12	438	3	9	0	-3.92	2.24	0.71	25	27.4	0.89	0	3	1	1	1
COADREAD	COL15A1	71	348	6	413	0	6	-1.7	-5.94	0	1	0	17.19	0	0	2	1	1	1
COADREAD	LRP1	90	360	12	438	0	12	-2.78	-6.94	0	1	0	20.55	0	0	4	1	1	1
COADREAD	LRP5	45	397	7	435	1	6	2.47	-2.47	2.47	0.483	14.29	10.11	1.47	0	2	1	1	1
COADREAD	ADCY4	123	327	7	443	2	5	0	-3.36	2.24	0.747	28.57	27.31	1.06	0	4	1	1	1
COADREAD	IGHMBP2	54	380	6	428	0	6	-2.12	-5.29	0	1	0	12.62	0	0	3	1	1	1
GBM	ACACB	70	294	10	354	4	6	5.31	0	7.07	0.0567	40	18.64	2.8	2	0	0.0441	0.0567	1
GBM	VNN1	40	269	6	303	3	3	5.74	0	8.62	0.0922	50	12.21	6.72	2	0	0.0789	0.0922	1
GBM	EMR1	83	282	6	359	3	3	3.12	-0.78	4.68	0.123	50	22.28	3.4	2	0	0.0789	0.123	1
GBM	LRP2	68	297	23	342	6	17	3.61	-2.71	9.04	0.17	26.09	18.13	1.54	4	3	0.0303	0.17	1
GBM	ABCC2	201	164	11	354	8	3	2.21	-1.11	5.54	0.215	72.73	54.52	2.18	6	0	0.000228	0.215	1
GBM	PKHD1	85	280	11	354	4	7	3.07	-1.53	6.13	0.177	36.36	22.88	1.88	2	1	0.237	0.237	1
GBM	MASP1	43	319	9	353	3	6	5.28	0	7.92	0.0843	33.33	11.33	3.71	1	0	0.257	0.257	1
GBM	IFIT5	125	182	4	303	3	1	1.35	-0.67	4.05	0.168	75	40.26	4.37	2	0	0.262	0.262	1
GBM	LAMA2	98	267	4	361	2	2	1.39	-1.39	2.79	0.273	50	26.59	2.72	2	0	0.0741	0.273	1
GBM	PKD2L1	188	167	4	351	3	1	1.13	-1.13	3.39	0.284	75	52.71	2.66	2	0	0.262	0.284	1
GBM	NPC1L1	114	236	11	339	5	6	1.3	-2.6	5.2	0.315	45.45	32.15	1.73	2	1	0.38	0.38	1
GBM	UNC13B	41	183	7	217	2	5	2.99	-4.48	5.97	0.396	28.57	17.97	1.79	2	1	0.156	0.396	1
GBM	CFTR	62	234	21	275	6	15	2.04	-6.12	8.16	0.408	28.57	20.36	1.51	6	1	4.37e-06	0.408	1
GBM	SCN10A	54	311	14	351	3	11	2.17	-4.35	6.52	0.375	21.43	14.53	1.57	1	1	0.414	0.414	1
GBM	SACS	90	275	11	354	3	8	1.47	-2.95	4.42	0.419	27.27	24.58	1.15	3	3	0.167	0.419	1
GBM	F5	46	319	5	360	1	4	2.49	-2.49	2.49	0.435	20	12.5	1.73	1	0	0.19	0.435	1
GBM	EP300	101	264	5	360	2	3	1.37	-2.05	2.74	0.47	40	27.5	1.74	2	0	0.043	0.47	1
GBM	AEBP1	104	260	4	360	2	2	1.35	-1.35	2.69	0.327	50	28.33	2.5	2	1	0.5	0.5	1
GBM	H6PD	60	246	7	299	2	5	0	-4.15	4.15	0.505	28.57	19.4	1.64	2	1	0.156	0.505	1
GBM	FAN1	46	267	8	305	2	6	2.55	-5.1	5.1	0.448	25	14.43	1.93	1	1	0.515	0.515	1
GBM	ATP2A1	49	316	5	360	1	4	0	-3.54	2.36	0.539	20	13.33	1.61	1	1	0.51	0.539	1
GBM	THAP3	71	294	5	360	1	4	0	-1.75	1.75	0.549	20	19.44	1.04	1	1	0.51	0.549	1
GBM	CLCN6	56	309	6	359	1	5	0	-3.16	2.11	0.552	16.67	15.32	1.1	1	1	0.438	0.552	1
GBM	COL22A1	72	293	8	357	3	5	1.73	-1.73	5.19	0.247	37.5	19.33	2.44	2	2	0.553	0.553	1
GBM	ABCA9	40	325	7	358	1	6	0	-5.62	2.81	0.564	14.29	10.89	1.35	1	1	0.383	0.564	1
GBM	COL19A1	78	287	10	355	3	7	1.63	-3.26	4.89	0.336	30	21.13	1.58	2	3	0.588	0.588	1
GBM	CP	59	306	5	360	1	4	0	-4.04	2.02	0.589	20	16.11	1.3	1	1	0.51	0.589	1
GBM	ALAD	52	310	4	358	1	3	2.25	-2.25	2.25	0.482	25	14.25	1.99	1	1	0.609	0.609	1
GBM	ABCC5	38	259	4	293	1	3	3.02	-3.02	3.02	0.442	25	12.63	2.27	1	1	0.609	0.609	1
GBM	MSH6	36	329	4	361	1	3	3.08	-3.08	3.08	0.347	25	9.7	3.05	1	1	0.609	0.609	1
GBM	NELL2	42	310	4	348	1	3	2.7	-2.7	2.7	0.441	25	11.78	2.46	1	1	0.609	0.609	1
GBM	PAK6	40	322	4	358	1	3	2.81	-2.81	2.81	0.398	25	10.89	2.68	1	1	0.609	0.609	1
GBM	COL5A3	153	212	7	358	4	3	1.13	-1.13	3.94	0.297	57.14	41.62	1.85	2	1	0.619	0.619	1
GBM	MYH11	49	314	7	356	1	6	0	-4.72	2.36	0.626	14.29	13.48	1.07	1	1	0.383	0.626	1
GBM	MYH4	53	223	10	266	2	8	0	-7.01	4.67	0.65	20	19.17	1.05	2	1	0.0741	0.65	1
GBM	SORL1	59	306	6	359	2	4	2.02	-2.02	4.04	0.224	33.33	15.88	2.59	1	1	0.657	0.657	1
GBM	BRCA1	38	263	6	295	2	4	3.01	-3.01	6.02	0.226	33.33	12.2	3.46	1	1	0.657	0.657	1
GBM	ABCB5	136	229	8	357	3	5	0	-3.52	2.34	0.661	37.5	37.25	1.01	2	1	0.262	0.661	1
GBM	RYR1	100	264	15	349	4	11	0	-5.52	4.14	0.674	26.67	27.51	0.96	3	4	0.275	0.674	1
GBM	NPC1	52	272	9	315	2	7	2.29	-4.58	4.58	0.488	22.22	15.87	1.49	1	2	0.675	0.675	1
GBM	ERCC6	182	177	6	353	3	3	0	-2.23	2.23	0.676	50	50.71	0.97	2	0	0.0789	0.676	1
GBM	CPXM2	211	154	4	361	3	1	1.12	-1.12	3.37	0.349	75	57.62	2.19	1	0	0.684	0.684	1
GBM	COL5A1	104	261	8	357	3	5	1.34	-2.69	4.03	0.379	37.5	28.29	1.51	1	1	0.684	0.684	1
GBM	MYO16	77	284	6	355	1	5	0	-3.3	1.65	0.72	16.67	21.41	0.74	1	1	0.438	0.72	1
GBM	LRP1	59	306	8	357	2	6	2.02	-3.03	4.04	0.38	25	15.97	1.73	1	2	0.734	0.734	1
GBM	SEC23B	56	309	5	360	1	4	0	-3.16	2.11	0.569	20	15.28	1.38	1	2	0.75	0.75	1
GBM	IQGAP2	71	294	5	360	2	3	1.75	-1.75	3.5	0.365	40	19.17	2.76	1	1	0.756	0.756	1
GBM	TAS1R1	61	304	5	360	2	3	1.97	-1.97	3.94	0.269	40	16.39	3.32	1	1	0.756	0.756	1
GBM	MYO3A	234	122	4	352	4	0	1.25	0	3.74	0.287	100	65.34	0	2	0	0.812	0.812	1
GBM	ABCB8	134	229	8	355	4	4	1.18	-2.37	4.14	0.349	50	36.62	1.71	1	1	0.832	0.832	1
GBM	ALOXE3	85	279	6	358	3	3	1.53	-1.53	4.6	0.191	50	22.91	3.28	1	1	0.847	0.847	1
GBM	DNAH5	94	271	6	359	3	3	1.43	-1.43	4.3	0.209	50	25.35	2.88	1	1	0.847	0.847	1
GBM	SVOPL	68	294	4	358	2	2	1.81	-0.91	3.62	0.162	50	18.44	4.32	1	1	0.875	0.875	1
GBM	ATP8B4	47	318	4	361	2	2	4.88	0	4.88	0.0866	50	12.47	6.77	1	1	0.875	0.875	1
GBM	POSTN	64	256	4	316	2	2	1.95	-0.98	3.91	0.156	50	19.62	4	1	1	0.875	0.875	1
GBM	COL1A2	113	240	6	347	1	5	-1.3	-3.9	1.3	0.891	16.67	32.28	0.42	1	2	0.66	0.891	1
GBM	ATP1A4	50	315	10	355	3	7	4.63	-2.32	6.95	0.169	30	13.24	2.7	1	3	0.9	0.9	1
GBM	GLDC	112	231	6	337	1	5	-1.33	-3.98	1.33	0.908	16.67	32.94	0.41	1	1	0.438	0.908	1
GBM	HOGA1	183	144	4	323	2	2	-1.24	-2.48	1.24	0.93	50	56.04	0.79	2	0	0.0741	0.93	1
GBM	CLCN1	110	254	6	358	1	5	-1.3	-3.91	1.3	0.888	16.67	30.45	0.46	1	4	0.938	0.938	1
GBM	SLC12A9	149	216	4	361	3	1	1.13	-0.57	3.4	0.17	75	40.44	4.35	2	1	0.949	0.949	1
GBM	SMO	42	321	4	359	3	1	5.38	2.69	8.08	0.0104	75	10.86	22.93	1	1	0.996	0.996	1
GBM	CUBN	297	68	8	357	4	4	-5.42	-7.23	-1.81	0.998	50	82.07	0.23	3	1	0.163	0.998	1
GBM	LRP5	41	324	5	360	1	4	2.75	-2.75	2.75	0.363	20	11.11	1.98	0	1	1	1	1
GBM	STAB1	64	301	8	357	1	7	-1.89	-5.68	1.89	0.865	12.5	17.65	0.67	0	2	1	1	1
GBM	CAD	33	332	6	359	0	6	0	-6.66	0	1	0	9.19	0	0	3	1	1	1
GBM	MYH3	72	281	7	346	0	7	-3.49	-6.98	0	1	0	20.81	0	0	1	1	1	1
GBM	MYH7	91	260	5	346	2	3	1.48	-1.48	2.97	0.316	40	25.72	1.9	0	1	1	1	1
GBM	MEIS3	37	303	4	336	0	4	0	-6.07	0	1	0	11.01	0	0	2	1	1	1
GBM	LRP1B	91	274	23	342	2	21	-5.86	-10.98	0	0.989	8.7	26.02	0.29	0	2	1	1	1
GBM	ZNF266	41	293	4	330	0	4	0	-5.56	0	1	0	12.42	0	0	2	1	1	1
GBM	CAPN2	41	324	5	360	0	5	0	-5.5	0	1	0	11.39	0	0	2	1	1	1
GBM	ABCA10	47	318	6	359	1	5	0	-3.66	2.44	0.549	16.67	12.81	1.35	0	2	1	1	1
GBM	LTBP2	69	279	6	342	0	6	-1.81	-5.42	0	1	0	20.18	0	0	4	1	1	1
GBM	DYSF	60	305	16	349	4	12	3.99	-2.99	7.98	0.215	25	16.05	1.69	0	3	1	1	1
GBM	TMPRSS3	48	315	4	359	0	4	0	-4.8	0	1	0	13.37	0	0	1	1	1	1
GBM	ITPR3	78	287	7	358	0	7	-1.63	-4.89	0	1	0	21.79	0	0	3	1	1	1
GBM	COL7A1	37	323	10	350	1	9	0	-6.02	3.01	0.579	10	10.29	0.97	0	5	1	1	1
GBM	POLG	41	255	9	287	0	9	-2.83	-9.91	0	1	0	14.29	0	0	3	1	1	1
GBM	ATIC	46	319	6	359	2	4	4.97	0	4.97	0.106	33.33	12.26	3.47	0	3	1	1	1
GBM	TPCN2	54	311	4	361	0	4	0	-4.35	0	1	0	14.96	0	0	2	1	1	1
GBM	OTOF	44	320	7	357	0	7	-2.59	-7.76	0	1	0	12.32	0	0	2	1	1	1
GBM	ATP6V0A4	84	274	7	351	1	6	-1.56	-4.67	1.56	0.858	14.29	23.65	0.54	0	2	1	1	1
GBM	ABCA4	68	297	13	352	1	12	-1.81	-7.23	1.81	0.916	7.69	19.03	0.36	0	2	1	1	1
GBM	HK1	225	140	5	360	2	3	-1.16	-3.48	1.16	0.926	40	61.94	0.41	0	1	1	1	1
HNSC	DNAH8	143	328	7	464	5	2	3.01	0.5	5.02	0.0227	71.43	29.74	5.73	3	0	0.0623	0.0623	1
HNSC	UNC13B	62	199	9	252	5	4	6.35	0	10.58	0.0708	55.56	22.62	4.01	4	0	0.00127	0.0708	1
HNSC	POMT1	84	387	7	464	3	4	2.9	0	4.35	0.0567	42.86	17.46	3.46	3	1	0.0837	0.0837	1
HNSC	TNFRSF13B	96	374	10	460	4	6	2.62	-0.65	5.24	0.0901	40	20	2.6	3	1	0.0695	0.0901	1
HNSC	TYR	61	374	6	429	3	3	3.81	0	5.72	0.0309	50	13.52	6.13	3	1	0.152	0.152	1
HNSC	ABCC2	60	411	10	461	3	7	3.82	0	5.73	0.0939	30	12.36	2.94	2	1	0.162	0.162	1
HNSC	COL4A1	163	308	6	465	4	2	1.88	-0.47	3.75	0.135	66.67	34.19	3.78	4	1	0.188	0.188	1
HNSC	HMCN1	69	402	13	459	3	9	1.7	-2.55	5.09	0.262	23.08	14.38	1.94	3	2	0.0508	0.262	1
HNSC	CACNA1S	87	384	20	451	5	15	1.41	-2.82	5.64	0.291	25	18.18	1.47	2	2	0.238	0.291	1
HNSC	HAL	67	404	12	459	3	9	1.74	-2.61	5.22	0.317	25	13.94	2.01	3	0	0.000481	0.317	1
HNSC	TG	124	347	7	464	3	4	1.09	-1.09	3.28	0.277	42.86	26.08	2.1	2	1	0.348	0.348	1
HNSC	MYH11	59	409	11	457	5	6	7.76	1.94	9.7	0.00794	45.45	11.82	5.78	2	1	0.38	0.38	1
HNSC	CDAN1	47	232	8	271	2	6	2.56	-3.84	5.12	0.382	25	16.61	1.65	2	1	0.118	0.382	1
HNSC	CP	95	376	11	460	3	8	1.32	-2.64	3.96	0.398	27.27	20	1.48	2	2	0.309	0.398	1
HNSC	CFTR	49	331	18	363	3	14	2.34	-4.69	7.03	0.398	16.67	12.67	1.45	1	1	0.344	0.398	1
HNSC	ABCA5	63	408	8	464	2	5	1.83	-2.75	3.66	0.408	25	13.15	2.59	1	0	0.23	0.408	1
HNSC	NPC1L1	59	383	8	434	3	5	3.91	0	5.87	0.0801	37.5	12.9	3.89	3	3	0.447	0.447	1
HNSC	FLNB	191	243	12	422	6	6	0.94	-2.34	3.74	0.391	50	43.84	1.27	2	1	0.462	0.462	1
HNSC	SACS	128	343	16	456	5	10	1.07	-3.22	4.29	0.478	31.25	26.97	1.34	3	0	0.00169	0.478	1
HNSC	COL7A1	152	319	12	459	6	6	1.94	-0.97	4.86	0.163	50	31.81	2.1	3	2	0.484	0.484	1
HNSC	INSRR	47	422	8	461	1	7	2.36	-2.36	2.36	0.495	12.5	9.98	1.28	1	1	0.34	0.495	1
HNSC	SCN10A	197	274	22	449	10	12	0.87	-3.49	4.36	0.499	45.45	41.65	1.16	4	3	0.341	0.499	1
HNSC	HK3	92	378	13	457	3	10	1.35	-2.7	4.05	0.454	23.08	19.47	1.23	2	4	0.54	0.54	1
HNSC	ABCA12	93	378	9	463	3	5	1.34	-1.34	4.02	0.223	33.33	19.44	2.44	2	2	0.553	0.553	1
HNSC	DSP	138	333	7	465	2	4	0	-2.05	2.05	0.562	28.57	29.25	1.21	2	1	0.216	0.562	1
HNSC	LRP1B	137	334	15	458	4	9	0	-3.09	3.09	0.561	26.67	29.04	1.08	2	3	0.572	0.572	1
HNSC	ABCC10	49	418	7	460	1	6	0	-4.56	2.28	0.599	14.29	10.43	1.42	1	2	0.587	0.599	1
HNSC	RYR1	93	378	15	457	3	11	0	-4.02	4.02	0.536	20	19.69	1.11	1	2	0.607	0.607	1
HNSC	MFN1	81	390	12	459	2	10	0	-4.47	2.98	0.683	16.67	17.21	0.96	1	2	0.539	0.683	1
HNSC	COL22A1	112	359	9	463	3	5	1.17	-1.17	3.51	0.283	33.33	23.54	1.92	1	1	0.684	0.684	1
HNSC	ACAD9	49	242	6	285	1	5	0	-4.91	2.45	0.706	16.67	16.84	0.99	1	2	0.66	0.706	1
HNSC	ATP1A4	83	388	7	464	1	6	0	-2.93	1.46	0.741	14.29	17.67	0.78	1	2	0.587	0.741	1
HNSC	APC	92	361	18	436	3	14	-1.36	-5.46	2.73	0.748	16.67	20.41	0.84	1	3	0.655	0.748	1
HNSC	LAMA1	152	319	10	461	3	7	0	-2.91	2.91	0.593	30	32.32	0.9	1	2	0.777	0.777	1
HNSC	FBN2	144	327	13	459	3	9	-1	-4	2	0.793	23.08	30.72	0.76	3	2	0.0508	0.793	1
HNSC	TPCN2	100	371	7	464	2	5	1.27	-1.9	2.54	0.401	28.57	21.12	1.48	1	2	0.802	0.802	1
HNSC	DNAH9	235	236	6	465	4	2	0.85	-0.85	2.97	0.271	66.67	49.68	2.01	2	1	0.812	0.812	1
HNSC	CACNA1D	218	248	6	460	2	4	-0.86	-2.59	1.72	0.825	33.33	46.96	0.57	2	1	0.216	0.825	1
HNSC	SLC7A8	57	414	6	465	1	5	0	-2.99	2	0.587	16.67	12.04	1.45	1	3	0.826	0.826	1
HNSC	VPS13B	57	414	7	465	1	5	0	-2	2	0.5	14.29	12.04	1.45	1	3	0.826	0.826	1
HNSC	NALCN	145	326	6	465	3	3	1	-1	2.99	0.249	50	30.54	2.25	2	2	0.848	0.848	1
HNSC	GARNL3	90	376	6	460	2	4	1.38	-1.38	2.75	0.354	33.33	19.13	2.09	1	2	0.875	0.875	1
HNSC	COL5A1	206	265	13	459	4	8	-1.73	-4.31	1.29	0.892	30.77	44.01	0.64	4	2	0.0232	0.892	1
HNSC	COL5A3	148	323	10	462	4	5	0.99	-0.99	3.94	0.241	40	31.17	1.75	1	2	0.932	0.932	1
HNSC	COL27A1	209	262	9	462	4	5	-0.86	-2.58	1.72	0.764	44.44	44.37	1	1	3	0.987	0.987	1
HNSC	MUT	48	421	8	461	1	7	0	-4.64	2.32	0.582	12.5	10.2	1.25	0	3	1	1	1
HNSC	LRP5	50	421	14	458	2	11	2.24	-4.48	4.48	0.434	14.29	10.48	1.53	0	3	1	1	1
HNSC	MYH6	118	349	8	459	0	8	-2.27	-5.1	0	1	0	25.71	0	0	3	1	1	1
HNSC	KRT6C	70	401	6	465	0	6	-1.68	-5.03	0	1	0	15.05	0	0	3	1	1	1
HNSC	ATP4A	43	416	6	453	1	5	0	-2.57	2.57	0.513	16.67	9.27	1.93	0	3	1	1	1
HNSC	NLRP8	72	392	8	456	2	6	1.64	-1.64	3.29	0.312	25	15.35	1.81	0	3	1	1	1
HNSC	SCN11A	158	313	11	460	4	7	0	-2.86	2.86	0.521	36.36	33.48	1.13	0	4	1	1	1
HNSC	GANC	46	425	9	462	1	8	0	-4.82	2.41	0.563	11.11	9.74	1.15	0	3	1	1	1
HNSC	ABCC11	55	318	7	366	1	6	0	-4.27	2.13	0.721	14.29	14.75	0.96	0	2	1	1	1
KIRC	SCN10A	184	146	13	318	10	2	3.69	0	7.98	0.0429	76.92	54.72	3.97	4	0	0.0956	0.0956	0.956
KIRC	DNAH5	52	278	4	326	2	2	2.28	-1.14	4.57	0.168	50	15.34	5.35	2	1	0.5	0.5	1
KIRC	CACNA1D	185	144	5	324	3	2	0	-2.47	2.47	0.595	60	56.17	1.17	2	1	0.688	0.688	1
KIRC	CACNA1S	39	291	10	320	1	9	0	-7.27	2.91	0.769	10	11.88	0.83	1	1	0.278	0.769	1
KIRC	FBN3	47	283	10	320	1	9	0	-6.2	2.48	0.748	10	14.38	0.67	1	5	0.797	0.797	1
KIRC	SCN11A	164	166	6	324	2	4	-1.21	-3.64	1.82	0.836	33.33	50	0.51	1	2	0.875	0.875	1
KIRC	KCNH8	111	206	7	310	2	5	0	-4.16	2.77	0.774	28.57	35.16	0.74	1	3	0.928	0.928	1
KIRC	ACAA1	37	90	5	122	0	5	-7.63	-15.26	0	1	0	30.33	0	0	3	1	1	1
KIRC	COL4A1	42	288	6	324	1	5	0	-4.09	2.73	0.565	16.67	12.65	1.37	0	3	1	1	1
KIRC	SYNJ2	36	289	9	317	0	8	-3.12	-7.81	0	1	0	11.36	0	0	3	1	1	1
LGG	SLC5A9	75	389	6	458	4	2	4.77	1.59	6.36	0.00717	66.67	15.5	10.37	3	0	0.0355	0.0355	0.903429
LGG	CPT2	90	328	5	413	3	2	2.83	0	4.25	0.0753	60	21.07	5.47	3	0	0.0162	0.0753	0.903429
LGG	EPHB2	45	419	7	457	3	4	4.92	1.23	7.38	0.0263	42.86	9.19	6.98	3	1	0.0837	0.0837	0.903429
LGG	SACS	51	413	13	451	3	10	4.41	-2.2	6.61	0.13	23.08	10.64	2.43	2	1	0.0923	0.13	0.903429
LGG	TP53	137	327	5	459	3	2	2.07	-0.52	3.11	0.162	60	29.19	3.58	3	0	0.0162	0.162	0.903429
LGG	MYH3	72	374	14	432	4	10	3.31	-1.66	6.63	0.18	28.57	15.74	2.08	3	1	0.0205	0.18	0.903429
LGG	MYH8	73	391	5	459	2	3	1.63	-1.63	3.25	0.186	40	15.47	3.57	2	0	0.043	0.186	0.903429
LGG	GJB4	81	345	5	421	2	3	3.05	0	3.05	0.0648	40	18.76	2.84	2	1	0.316	0.316	1
LGG	LRP1B	44	420	17	447	4	13	7.53	0	10.04	0.056	23.53	8.95	2.94	2	3	0.367	0.367	1
LGG	STAB2	50	414	10	454	2	8	2.24	-2.24	4.48	0.304	20	10.57	2.07	1	1	0.421	0.421	1
LGG	MYH4	53	285	13	325	3	10	2.24	-4.48	6.71	0.461	23.08	15.38	1.61	3	2	0.039	0.461	1
LGG	COL17A1	74	390	5	459	1	4	0	-2.41	1.61	0.534	20	15.9	1.32	1	0	0.19	0.534	1
LGG	VPS13D	94	370	5	459	1	4	0	-2	1.33	0.574	20	20.26	0.98	1	0	0.19	0.574	1
LGG	GJB5	92	334	7	419	2	5	1.39	-1.39	2.77	0.277	28.57	21.48	1.45	1	1	0.578	0.578	1
LGG	KIF1B	105	284	7	382	2	5	0	-3.26	2.61	0.633	28.57	26.96	1.08	1	1	0.578	0.633	1
LGG	RYR1	182	282	25	439	9	16	0	-4.52	3.62	0.646	36	39.41	0.87	4	2	0.0469	0.646	1
LGG	HKDC1	50	414	6	458	2	4	4.48	0	4.48	0.117	33.33	10.48	4.14	1	1	0.657	0.657	1
LGG	ATP13A2	111	353	6	458	2	4	0	-2.37	2.37	0.508	33.33	23.8	1.59	1	1	0.657	0.657	1
LGG	MACF1	131	333	5	459	2	3	1.06	-1.06	2.13	0.416	40	28.1	1.69	1	1	0.756	0.756	1
LGG	DPYD	76	381	10	447	5	5	4.73	1.58	7.89	0.0154	50	15.88	5.01	2	2	0.792	0.792	1
LGG	COL22A1	61	403	9	455	3	6	3.77	0	5.66	0.0592	33.33	12.75	3.3	1	2	0.829	0.829	1
LGG	COL9A2	79	383	6	456	3	3	3.05	0	4.58	0.0931	50	16.67	4.85	2	2	0.848	0.848	1
LGG	ABCA4	165	299	14	450	8	6	2.82	-0.47	5.64	0.0884	57.14	34.89	2.42	1	1	0.886	0.886	1
LGG	NLRP8	174	287	7	454	1	6	-1.85	-3.69	0.92	0.963	14.29	38.11	0.27	1	1	0.383	0.963	1
LGG	PLOD1	71	353	8	416	1	7	0	-3.38	1.69	0.718	12.5	16.83	0.71	0	3	1	1	1
LGG	STAB1	44	420	7	457	0	7	0	-5.02	0	1	0	9.63	0	0	2	1	1	1
LGG	H6PD	80	332	5	407	1	4	0	-3.1	1.55	0.682	20	19.41	1.04	0	1	1	1	1
LGG	ROS1	52	412	11	453	1	10	0	-5.41	2.17	0.725	9.09	11.26	0.79	0	2	1	1	1
LGG	ABCB5	49	414	8	455	0	8	-2.28	-5.71	0	1	0	10.77	0	0	2	1	1	1
LGG	DHCR24	55	409	5	459	1	4	0	-3.09	2.06	0.593	20	11.76	1.86	0	2	1	1	1
LGG	LTBP2	55	387	5	437	0	5	0	-4.15	0	1	0	12.59	0	0	1	1	1	1
LGG	COL5A3	56	408	12	452	0	12	-2.03	-8.12	0	1	0	12.39	0	0	2	1	1	1
LGG	ABCC8	64	400	13	451	0	13	-1.81	-7.25	0	1	0	14.19	0	0	4	1	1	1
LGG	COL6A3	51	407	16	442	2	14	0	-6.62	4.41	0.635	12.5	11.09	1.14	0	2	1	1	1
LIHC	ABCC11	34	201	6	229	3	3	6.88	1.72	10.32	0.0289	50	13.54	5.91	2	0	0.0789	0.0789	1
LIHC	HMCN1	91	173	13	251	6	7	3.35	-1.68	8.38	0.143	46.15	33.86	1.63	3	1	0.127	0.143	1
LIHC	LRP2	53	211	10	255	3	6	2.36	-2.36	7.08	0.222	30	19.61	1.99	2	1	0.203	0.222	1
LIHC	SETX	49	215	8	256	3	5	2.51	-2.51	7.52	0.224	37.5	17.97	2.63	2	0	0.0372	0.224	1
LIHC	COL5A1	68	196	7	257	6	1	7.92	2.97	11.88	0.00249	85.71	24.12	17.29	3	0	0.244	0.244	1
LIHC	CACNA1S	78	186	12	252	5	7	3.64	-2.73	7.28	0.223	41.67	28.97	1.7	3	2	0.279	0.279	1
LIHC	SLC12A3	55	208	5	258	3	2	4.6	0	6.9	0.0767	60	20.16	5.67	3	1	0.312	0.312	1
LIHC	SYNJ2	57	195	5	247	2	3	2.27	-2.27	4.53	0.371	40	22.27	2.28	2	1	0.316	0.371	1
LIHC	TP53	112	152	5	259	3	2	1.55	-1.55	4.65	0.388	60	42.08	2.04	3	0	0.0162	0.388	1
LIHC	ABCA4	58	206	7	257	2	5	2.21	-4.42	4.42	0.454	28.57	21.79	1.42	2	1	0.156	0.454	1
LIHC	PYGB	28	236	6	258	1	5	0	-5.99	4	0.542	16.67	10.47	1.69	1	1	0.438	0.542	1
LIHC	ABCC10	25	234	7	252	1	6	0	-6.64	4.43	0.573	14.29	9.52	1.56	1	1	0.383	0.573	1
LIHC	COL6A3	49	210	7	252	1	6	0	-5.03	2.52	0.602	14.29	19.05	0.71	1	1	0.383	0.602	1
LIHC	SLC7A7	35	229	6	258	2	4	3.29	-3.29	6.59	0.232	33.33	12.79	3.27	1	1	0.657	0.657	1
LIHC	SULF1	45	199	6	238	2	4	2.72	-2.72	5.45	0.31	33.33	18.07	2.21	1	1	0.657	0.657	1
LIHC	SI	42	221	6	257	2	4	2.83	-2.83	5.67	0.286	33.33	15.56	2.63	1	1	0.657	0.657	1
LIHC	STAB1	45	219	6	258	1	5	0	-5.36	2.68	0.668	16.67	17.05	0.97	1	0	0.16	0.668	1
LIHC	PPOX	81	163	5	239	3	2	3.7	-0.92	5.54	0.134	60	32.64	3.02	2	1	0.688	0.688	1
LIHC	WHSC1L1	34	104	5	133	1	4	0	-7.81	3.9	0.7	20	24.81	0.76	1	1	0.51	0.7	1
LIHC	NALCN	59	204	5	258	1	4	0	-4.37	2.19	0.71	20	22.48	0.86	1	1	0.51	0.71	1
LIHC	USH2A	123	141	5	259	2	3	0	-3.81	3.04	0.762	40	46.72	0.76	2	0	0.043	0.762	1
LIHC	COL7A1	23	241	7	257	2	5	9.53	0	9.53	0.122	28.57	8.17	4.19	1	2	0.802	0.802	1
LIHC	ABCA7	72	192	9	255	2	7	0	-4.77	3.82	0.633	22.22	27.45	0.76	1	3	0.822	0.822	1
LIHC	COL4A1	79	185	7	257	5	2	5.42	0.9	9.03	0.0221	71.43	28.79	5.85	1	1	0.984	0.984	1
LIHC	CYB5R2	37	227	6	259	1	4	0	-3.14	3.14	0.509	16.67	13.9	1.53	0	2	1	1	1
LIHC	POLG	35	185	6	214	0	6	-3.4	-10.19	0	1	0	16.36	0	0	2	1	1	1
LIHC	ACACB	42	220	7	255	0	7	-2.84	-9.92	0	1	0	16.47	0	0	2	1	1	1
LIHC	WDR11	36	193	5	224	0	5	-3.3	-9.89	0	1	0	16.07	0	0	1	1	1	1
LIHC	KCNH6	34	218	5	247	0	5	-3.4	-6.8	0	1	0	13.77	0	0	2	1	1	1
LIHC	NSD1	21	243	9	255	0	9	-5.17	-15.52	0	1	0	8.24	0	0	3	1	1	1
LUAD	SLC3A1	54	460	12	502	4	8	6.21	0	8.28	0.0347	33.33	9.96	4.26	2	0	0.0276	0.0347	1
LUAD	MYH2	77	282	9	350	4	5	3.31	-0.83	6.61	0.114	44.44	20.86	2.93	3	0	0.00509	0.114	1
LUAD	COL7A1	86	433	17	502	6	11	4.18	0	8.36	0.0537	35.29	15.94	2.75	5	5	0.164	0.164	1
LUAD	GLDC	112	390	14	488	5	9	2.3	-1.15	5.75	0.172	35.71	21.93	1.93	4	3	0.117	0.172	1
LUAD	SI	120	403	11	512	4	7	2.16	-1.08	4.33	0.172	36.36	22.66	1.92	3	0	0.00222	0.172	1
LUAD	SCN10A	149	375	22	503	8	13	1.88	-1.88	5.63	0.191	36.36	28.03	1.55	4	2	0.06	0.191	1
LUAD	CFTR	56	375	26	405	7	19	6.16	0	12.31	0.0566	26.92	12.1	2.47	4	6	0.242	0.242	1
LUAD	NLRP8	146	371	10	507	4	6	0.95	-1.43	3.82	0.273	40	28.01	1.69	3	0	0.00327	0.273	1
LUAD	ATP1A4	131	393	12	512	5	7	2.04	-1.02	5.09	0.119	41.67	24.61	2.14	3	2	0.279	0.279	1
LUAD	ABCB5	81	442	9	514	3	6	1.46	-1.46	4.38	0.281	33.33	15.18	2.73	1	0	0.257	0.281	1
LUAD	COL17A1	113	411	9	515	3	6	1.13	-1.69	3.38	0.294	33.33	21.36	1.82	2	0	0.0278	0.294	1
LUAD	TPCN2	90	434	9	515	4	5	2.68	-0.67	5.37	0.0996	44.44	16.7	3.86	3	2	0.347	0.347	1
LUAD	ATP2A1	78	446	10	514	3	7	3.01	-1.51	4.52	0.189	30	14.59	2.45	2	2	0.37	0.37	1
LUAD	RYR1	149	373	15	507	5	10	0.94	-2.82	3.76	0.409	33.33	28.4	1.25	2	1	0.192	0.409	1
LUAD	FBN3	277	247	12	512	7	5	0.77	-1.91	3.06	0.412	58.33	52.73	1.25	7	0	2.07e-07	0.412	1
LUAD	MYO1A	48	264	10	302	2	8	2.46	-4.92	4.92	0.439	20	15.23	1.38	1	1	0.421	0.439	1
LUAD	CHD6	65	413	9	469	2	7	1.78	-1.78	3.56	0.254	22.22	13.43	1.82	1	1	0.464	0.464	1
LUAD	MYO9A	60	464	9	515	2	7	1.88	-2.82	3.76	0.384	22.22	11.26	2.21	1	1	0.464	0.464	1
LUAD	USH2A	166	358	14	510	5	9	0.88	-2.65	3.53	0.493	35.71	31.57	1.2	3	1	0.0473	0.493	1
LUAD	ABCC8	129	395	11	513	3	8	0	-2.57	3.09	0.518	27.27	24.56	1.15	2	2	0.309	0.518	1
LUAD	TPP1	164	360	9	515	3	6	0	-2.22	2.66	0.52	33.33	31.26	1.1	2	0	0.0278	0.52	1
LUAD	SCN11A	98	426	11	513	2	9	0	-3.14	2.51	0.568	18.18	18.71	0.97	2	1	0.0607	0.568	1
LUAD	APC	93	414	10	497	4	6	2.63	-0.66	5.27	0.0922	40	17.91	2.97	2	2	0.585	0.585	1
LUAD	CP	89	435	12	512	4	8	2.71	-1.35	5.41	0.177	33.33	16.6	2.44	1	1	0.598	0.598	1
LUAD	PYGB	104	420	10	514	2	8	0	-3	2.4	0.613	20	19.84	1.01	2	2	0.189	0.613	1
LUAD	EP400	74	320	10	384	2	8	0	-4.16	3.33	0.616	20	18.75	1.08	1	1	0.421	0.616	1
LUAD	ATP12A	126	387	9	504	3	6	1.05	-2.1	3.16	0.393	33.33	24.4	1.54	1	1	0.619	0.619	1
LUAD	SYNJ2	142	380	12	510	3	9	0	-2.9	2.42	0.636	25	27.25	0.89	1	1	0.478	0.636	1
LUAD	LRP2	126	398	16	508	3	13	0	-3.66	2.61	0.676	18.75	24.21	0.73	2	5	0.512	0.676	1
LUAD	MYH3	156	355	9	502	4	5	0.92	-1.85	2.77	0.417	44.44	30.28	1.82	2	2	0.691	0.691	1
LUAD	ABCA4	123	401	19	505	4	15	0	-4.25	3.19	0.704	21.05	23.56	0.87	4	4	0.0242	0.704	1
LUAD	MYH4	113	272	9	376	2	7	0	-3.76	2.51	0.729	22.22	29.52	0.69	1	1	0.464	0.729	1
LUAD	KCNH6	86	437	14	509	2	12	0	-4.87	2.78	0.753	14.29	16.5	0.85	1	4	0.72	0.753	1
LUAD	POSTN	90	368	13	445	2	11	0	-4.84	2.77	0.761	15.38	19.78	0.74	2	2	0.112	0.761	1
LUAD	COL14A1	131	389	9	511	4	5	2.04	-1.02	4.08	0.179	44.44	24.85	2.38	1	1	0.763	0.763	1
LUAD	ABCC3	70	454	13	511	4	9	3.3	-0.82	6.6	0.0862	30.77	12.92	2.88	1	2	0.763	0.763	1
LUAD	SLC7A2	81	434	11	504	5	6	4.39	1.46	7.32	0.0191	45.45	15.08	4.47	1	1	0.765	0.765	1
LUAD	TENC1	65	453	10	508	1	9	0	-5.28	1.76	0.798	10	12.6	0.77	1	2	0.438	0.798	1
LUAD	MYH11	93	430	12	511	3	9	1.31	-2.62	3.92	0.357	25	17.61	1.54	1	3	0.821	0.821	1
LUAD	ASPM	114	410	13	511	2	11	-1.12	-4.48	1.68	0.849	15.38	21.92	0.65	2	1	0.043	0.849	1
LUAD	ABCA5	67	457	12	513	3	8	3.42	-0.86	5.13	0.111	25	12.48	2.56	1	3	0.861	0.861	1
LUAD	MYH1	69	447	11	506	2	8	1.67	-3.35	3.35	0.397	18.18	13.24	1.62	1	4	0.875	0.875	1
LUAD	LRP6	80	429	10	499	4	6	4.45	0	5.93	0.053	40	15.23	3.58	1	2	0.89	0.89	1
LUAD	LRP1B	132	392	17	507	2	15	-2.03	-6.08	1.01	0.957	11.76	25.64	0.4	1	2	0.399	0.957	1
LUAD	ABCA7	231	293	13	511	3	10	-2.32	-4.65	0.77	0.968	23.08	44.62	0.38	2	1	0.0923	0.968	1
LUAD	OGDHL	63	460	9	514	2	7	1.8	-2.71	3.61	0.36	22.22	11.87	2.09	1	5	0.969	0.969	1
LUAD	LRP1	106	418	16	508	1	15	-2.37	-6.5	0.59	0.973	6.25	20.67	0.26	1	2	0.288	0.973	1
LUAD	COL22A1	130	394	10	514	0	10	-2.05	-5.12	0	1	0	25.29	0	0	3	1	1	1
LUAD	TSC2	48	310	14	344	0	14	-4.81	-10.83	0	1	0	13.95	0	0	2	1	1	1
LUAD	DYSF	82	442	12	512	0	12	-2.89	-6.51	0	1	0	16.02	0	0	3	1	1	1
LUAD	KCNH1	57	455	10	502	1	9	0	-3.95	1.97	0.67	10	11.16	0.89	0	3	1	1	1
LUAD	HMCN1	80	444	17	507	2	15	0	-5.9	2.95	0.755	11.76	15.38	0.74	0	2	1	1	1
LUAD	DNAH3	85	439	14	510	1	13	-1.4	-5.62	1.4	0.911	7.14	16.47	0.4	0	2	1	1	1
LUAD	NPC1L1	75	430	13	492	0	13	-3.13	-6.26	0	1	0	15.24	0	0	2	1	1	1
LUAD	FLNB	134	353	12	475	1	11	-2.06	-5.15	0.51	0.977	8.33	28	0.24	0	7	1	1	1
LUAD	ABCC2	85	439	13	511	1	12	-1.4	-5.62	1.4	0.906	7.69	16.44	0.43	0	2	1	1	1
LUSC	ALDOB	104	242	7	339	6	1	5.5	1.37	8.25	0.00749	85.71	28.91	13.96	5	0	0.0129	0.0129	1
LUSC	SI	117	353	14	456	7	7	3.41	0	6.83	0.0439	50	24.12	3.02	4	1	0.0455	0.0455	1
LUSC	DNAH3	108	362	7	463	4	3	2.4	0	4.81	0.0579	57.14	22.46	4.47	3	0	0.0161	0.0579	1
LUSC	ERCC6	97	366	6	457	3	3	2.61	0	3.91	0.0583	50	20.57	3.77	3	0	0.00708	0.0583	1
LUSC	EDIL3	83	306	5	384	3	2	3.06	0	4.59	0.0589	60	20.83	5.53	3	0	0.0162	0.0589	1
LUSC	MYH1	102	365	9	458	7	2	6.27	3.14	8.78	0.000316	77.78	20.74	12.52	3	0	0.135	0.135	1
LUSC	SCN10A	252	218	21	449	14	7	2.57	-1.28	5.99	0.14	66.67	53.01	1.73	7	1	0.0127	0.14	1
LUSC	HKDC1	136	334	5	465	3	2	2.07	-0.52	3.1	0.156	60	28.6	3.68	2	0	0.132	0.156	1
LUSC	ABCA9	79	391	9	461	3	6	3.04	-1.52	4.56	0.164	33.33	16.49	2.47	2	0	0.0278	0.164	1
LUSC	HK3	130	340	18	452	11	7	6.38	2.66	10.1	0.00192	61.11	26.33	4.11	4	1	0.173	0.173	1
LUSC	ACACB	116	354	10	460	4	6	2.29	-1.14	4.58	0.179	40	24.35	2.03	3	1	0.0695	0.179	1
LUSC	ENTPD4	117	268	5	380	3	2	2.46	-1.23	3.68	0.18	60	30	3.44	3	0	0.0162	0.18	1
LUSC	TECTA	100	370	5	465	3	2	1.27	-1.27	3.81	0.186	60	20.86	5.55	3	0	0.0162	0.186	1
LUSC	MYO9A	59	411	11	459	3	8	3.88	-1.94	5.81	0.186	27.27	12.2	2.61	3	2	0.0679	0.186	1
LUSC	RBL2	104	268	10	363	4	5	2.67	-1.33	5.34	0.204	40	27.55	2.06	2	0	0.0586	0.204	1
LUSC	MYH4	168	180	14	334	9	5	2.3	-1.73	6.33	0.219	64.29	47.6	1.93	6	1	0.0197	0.219	1
LUSC	ASPA	281	187	6	462	5	1	0.89	-0.89	3.56	0.223	83.33	59.74	3.33	3	0	0.169	0.223	1
LUSC	ABCA6	116	354	11	459	6	5	3.43	0	6.87	0.0383	54.55	23.97	3.66	3	1	0.244	0.244	1
LUSC	FLG	90	347	6	431	2	4	1.4	-1.4	2.8	0.249	33.33	20.42	1.93	2	1	0.216	0.249	1
LUSC	CFTR	58	319	18	359	4	14	2.04	-4.08	8.15	0.257	22.22	15.04	1.57	3	3	0.0867	0.257	1
LUSC	PYGM	67	403	8	462	2	6	1.74	-1.74	3.48	0.271	25	14.07	2	2	1	0.118	0.271	1
LUSC	COL17A1	162	308	8	462	4	4	0.94	-1.41	3.3	0.295	50	34.2	1.9	2	0	0.0815	0.295	1
LUSC	EP400	45	295	11	329	3	8	5.12	-2.56	7.68	0.167	27.27	12.77	2.46	2	2	0.309	0.309	1
LUSC	SLIT1	55	415	5	465	2	3	4.12	0	4.12	0.0869	40	11.4	5.03	2	1	0.316	0.316	1
LUSC	NOTCH3	50	418	5	463	2	3	4.48	0	4.48	0.109	40	10.37	5.57	2	1	0.316	0.316	1
LUSC	RYR1	151	318	18	451	8	10	1.95	-1.95	5.37	0.243	44.44	31.71	1.68	3	2	0.336	0.336	1
LUSC	SACS	194	276	9	461	5	4	0.88	-1.76	3.51	0.339	55.56	41	1.78	4	1	0.0705	0.339	1
LUSC	GUCY2D	223	179	5	397	5	0	2.01	0	4.03	0.0526	100	54.91	0	4	0	0.344	0.344	1
LUSC	GARNL3	141	329	5	465	5	0	4.05	1.52	5.07	0.00176	100	29.25	0	4	0	0.344	0.344	1
LUSC	F5	112	358	7	463	3	4	2.34	-1.17	3.52	0.194	42.86	23.54	2.4	1	0	0.344	0.344	1
LUSC	PLOD1	103	329	5	427	2	3	1.27	-1.27	2.55	0.345	40	23.65	2.13	2	1	0.316	0.345	1
LUSC	CPS1	132	338	9	461	4	5	2.11	-1.05	4.21	0.193	44.44	27.77	2.05	3	2	0.347	0.347	1
LUSC	LDLR	125	345	7	463	3	4	1.09	-1.09	3.27	0.256	42.86	26.35	2.07	2	1	0.348	0.348	1
LUSC	CREB3	229	241	5	465	4	1	0.85	-0.85	2.98	0.192	80	48.39	4.21	2	0	0.367	0.367	1
LUSC	PRPF8	233	220	6	447	4	2	0.88	-0.88	2.65	0.382	66.67	51.23	1.89	3	0	0.0355	0.382	1
LUSC	COL7A1	192	275	10	457	5	5	0.88	-1.77	3.54	0.386	50	40.92	1.43	3	1	0.169	0.386	1
LUSC	ABCA5	105	365	6	464	2	4	1.23	-1.84	2.45	0.395	33.33	22.2	1.74	2	1	0.216	0.395	1
LUSC	CTSB	217	253	7	463	4	3	0.86	-1.71	2.57	0.405	57.14	46	1.55	3	0	0.0161	0.405	1
LUSC	FBN2	230	240	11	459	6	5	0.85	-1.7	3.41	0.419	54.55	48.8	1.25	3	0	0.0157	0.419	1
LUSC	NALCN	250	220	6	464	4	2	0.85	-1.28	2.56	0.42	66.67	53.02	1.76	2	0	0.196	0.42	1
LUSC	OGDHL	106	363	6	463	2	4	1.22	-2.44	2.44	0.446	33.33	22.46	1.71	2	0	0.028	0.446	1
LUSC	H6PD	103	304	9	398	3	6	1.3	-2.6	3.9	0.401	33.33	25.13	1.48	2	2	0.45	0.45	1
LUSC	UNC13B	66	210	6	270	2	4	1.99	-3.98	3.98	0.45	33.33	23.7	1.59	1	0	0.271	0.45	1
LUSC	CNGB3	50	414	7	457	1	6	2.24	-2.24	2.24	0.458	14.29	10.72	1.38	1	0	0.138	0.458	1
LUSC	USH2A	125	345	6	464	3	3	1.09	-1.09	3.27	0.197	50	26.29	2.76	2	1	0.481	0.481	1
LUSC	DSP	142	328	6	464	3	3	1.01	-1.01	3.03	0.234	50	29.96	2.31	2	1	0.481	0.481	1
LUSC	GLDC	194	265	8	451	4	4	0.89	-1.79	2.68	0.483	50	42.13	1.37	2	0	0.0815	0.483	1
LUSC	FBN3	205	265	12	458	6	6	0.87	-2.16	3.46	0.398	50	43.45	1.29	3	2	0.484	0.484	1
LUSC	NRP1	90	380	6	464	2	4	1.37	-1.37	2.75	0.326	33.33	18.97	2.11	2	2	0.5	0.5	1
LUSC	LAMA1	180	290	5	465	3	2	0.9	-0.45	2.7	0.169	60	38.06	2.42	1	0	0.518	0.518	1
LUSC	TRPM2	57	391	6	442	3	3	4.02	0	6.03	0.036	50	12.22	6.86	3	2	0.519	0.519	1
LUSC	MUT	80	388	9	459	2	7	0	-3.02	3.02	0.522	22.22	16.99	1.39	1	1	0.464	0.522	1
LUSC	ABCA8	71	378	10	439	2	8	0	-3.35	3.35	0.525	20	15.72	1.33	1	1	0.421	0.525	1
LUSC	TNS1	184	286	7	463	3	4	0	-1.79	2.68	0.533	42.86	39.09	1.17	2	1	0.348	0.533	1
LUSC	POSTN	138	285	5	418	2	3	0	-2.15	2.15	0.558	40	32.54	1.38	2	0	0.043	0.558	1
LUSC	SLC26A2	161	309	8	462	3	5	0	-2.36	2.83	0.569	37.5	34.2	1.15	2	0	0.0372	0.569	1
LUSC	ATP8B4	85	385	5	465	1	4	0	-2.15	1.44	0.58	20	18.06	1.13	1	1	0.51	0.58	1
LUSC	SLC7A9	58	278	6	330	1	5	0	-4.17	2.08	0.615	16.67	17.27	0.96	1	1	0.438	0.615	1
LUSC	BRCA1	94	298	9	383	3	6	1.4	-2.8	4.2	0.398	33.33	23.76	1.59	1	1	0.619	0.619	1
LUSC	FARP2	100	343	8	435	2	6	0	-3.23	2.58	0.641	25	22.53	1.14	1	1	0.515	0.641	1
LUSC	ROS1	119	351	6	464	2	4	1.13	-2.25	2.25	0.464	33.33	25.22	1.47	1	1	0.657	0.657	1
LUSC	CACNA1D	278	185	8	455	5	3	0	-2.25	2.7	0.66	62.5	60	1.11	4	1	0.146	0.66	1
LUSC	ITPR3	186	283	12	457	5	7	0	-3.12	2.67	0.684	41.67	39.61	1.09	3	1	0.0841	0.684	1
LUSC	NPC1L1	90	361	11	440	2	9	0	-4.16	2.78	0.687	18.18	20	0.89	1	2	0.578	0.687	1
LUSC	COLQ	165	245	5	405	3	2	1.01	-1.01	3.04	0.337	60	40	2.23	2	1	0.688	0.688	1
LUSC	TG	136	334	5	465	3	2	1.03	-1.03	3.1	0.19	60	28.6	3.68	2	1	0.688	0.688	1
LUSC	COL19A1	107	363	9	461	4	5	2.42	-0.61	4.84	0.118	44.44	22.34	2.71	2	2	0.691	0.691	1
LUSC	LRP5	56	414	10	460	1	9	0	-4.05	2.03	0.705	10	11.96	0.82	1	2	0.438	0.705	1
LUSC	MSH5	52	213	5	260	1	4	0	-4.79	2.39	0.706	20	19.62	1.02	1	1	0.51	0.706	1
LUSC	SLC26A8	60	305	6	359	1	5	0	-3.99	1.99	0.708	16.67	16.43	1.02	1	2	0.66	0.708	1
LUSC	MFN1	93	377	8	462	2	6	1.34	-2.68	2.68	0.492	25	19.7	1.35	2	4	0.708	0.708	1
LUSC	LRP2	131	339	7	463	2	5	0	-2.65	2.12	0.71	28.57	27.86	1.04	1	1	0.578	0.71	1
LUSC	LRP1	83	387	11	459	4	7	2.93	-1.46	5.85	0.158	36.36	17.21	2.66	2	3	0.725	0.725	1
LUSC	LRP1B	161	309	33	437	10	23	-0.94	-6.14	3.78	0.743	30.3	34.55	0.83	4	7	0.467	0.743	1
LUSC	CPT1B	86	371	8	449	1	7	0	-3.58	1.43	0.747	12.5	18.93	0.62	1	2	0.527	0.747	1
LUSC	ABCB1	72	398	7	463	3	4	3.28	0	4.92	0.0957	42.86	14.9	4.15	1	1	0.76	0.76	1
LUSC	SLC12A7	104	366	7	463	3	4	1.23	-1.23	3.7	0.212	42.86	21.81	2.64	1	1	0.76	0.76	1
LUSC	NIPAL3	73	323	6	390	6	0	8.4	5.04	10.08	2.4e-05	100	17.18	0	3	0	0.773	0.773	1
LUSC	ADAMTSL3	115	352	5	462	1	4	0	-2.31	1.15	0.782	20	24.68	0.77	1	1	0.51	0.782	1
LUSC	CAD	51	419	7	463	2	5	4.4	0	4.4	0.128	28.57	10.58	3.29	1	2	0.802	0.802	1
LUSC	MYH6	162	307	8	461	2	6	-0.94	-2.83	1.89	0.813	25	34.71	0.63	1	1	0.515	0.813	1
LUSC	SYNJ2	83	382	9	456	2	7	0	-2.93	2.93	0.534	22.22	17.76	1.31	1	3	0.822	0.822	1
LUSC	MYH2	125	199	10	314	3	7	-1.3	-5.21	2.61	0.834	30	38.85	0.68	3	1	0.0227	0.834	1
LUSC	SETX	131	339	11	459	2	9	-1.06	-4.23	2.12	0.838	18.18	28.1	0.58	1	2	0.578	0.838	1
LUSC	CHD5	188	282	6	464	3	3	0.89	-1.33	2.66	0.391	50	39.87	1.5	1	1	0.847	0.847	1
LUSC	NLRP12	79	388	6	461	3	3	3.05	0	4.57	0.0306	50	16.49	4.91	1	1	0.847	0.847	1
LUSC	ABCC11	109	272	7	374	1	6	-1.29	-3.86	1.29	0.858	14.29	28.88	0.42	1	2	0.587	0.858	1
LUSC	MYH3	196	262	10	448	7	3	1.78	-0.45	4.46	0.098	70	42.19	3.12	4	2	0.863	0.863	1
LUSC	ABCC4	224	246	10	460	7	3	1.71	-0.85	4.26	0.142	70	47.17	2.56	2	1	0.865	0.865	1
LUSC	FER1L6	80	390	7	463	1	6	-1.51	-4.52	1.51	0.872	14.29	17.06	0.81	1	0	0.138	0.872	1
LUSC	NNT	44	379	6	417	2	4	2.54	-1.27	5.07	0.134	33.33	10.07	4.31	1	2	0.875	0.875	1
LUSC	COL6A2	181	284	6	459	2	4	0	-2.71	1.81	0.784	33.33	39	0.78	1	2	0.875	0.875	1
LUSC	ALOX12B	287	181	8	460	7	1	1.8	0	4.5	0.119	87.5	60.87	4.41	5	1	0.886	0.886	1
LUSC	DYSF	99	371	15	455	2	13	-1.28	-5.76	1.28	0.89	13.33	21.32	0.58	1	3	0.578	0.89	1
LUSC	PDE6A	127	238	5	360	1	4	-1.21	-3.62	1.21	0.89	20	35	0.47	1	1	0.51	0.89	1
LUSC	COL11A1	142	328	7	463	5	2	3.03	0	5.05	0.0432	71.43	29.59	5.77	2	1	0.891	0.891	1
LUSC	MTMR7	164	306	7	463	5	2	2.81	0	4.68	0.0516	71.43	34.34	4.66	2	1	0.891	0.891	1
LUSC	FANCA	161	267	5	423	1	4	-1	-2.99	1	0.893	20	37.83	0.41	1	2	0.75	0.893	1
LUSC	DCHS2	204	266	7	463	4	3	0.87	-1.73	2.6	0.435	57.14	43.2	1.74	1	1	0.905	0.905	1
LUSC	DNAJC6	82	314	7	389	3	4	3.08	-0.77	4.61	0.137	42.86	20.31	2.87	2	3	0.916	0.916	1
LUSC	SLC3A1	62	404	9	457	2	7	1.86	-2.79	3.72	0.373	22.22	13.13	1.86	1	4	0.916	0.916	1
LUSC	CUBN	180	290	7	463	4	3	0.9	-0.9	3.6	0.236	57.14	38.01	2.15	2	2	0.931	0.931	1
LUSC	THBS4	137	234	7	364	4	3	1.16	-1.16	4.63	0.23	57.14	36.54	2.28	2	2	0.931	0.931	1
LUSC	COL4A1	274	196	7	463	3	4	-0.88	-2.63	1.31	0.876	42.86	58.53	0.54	1	2	0.938	0.938	1
LUSC	ABCC2	140	330	12	458	6	6	2.03	-1.02	4.07	0.211	50	29.26	2.36	3	4	0.939	0.939	1
LUSC	NID1	80	372	5	447	2	3	1.52	-1.52	3.04	0.314	40	17.45	3.1	1	2	0.947	0.947	1
LUSC	SPG7	110	322	5	427	2	3	1.22	-1.22	2.44	0.271	40	25.29	1.95	1	2	0.947	0.947	1
LUSC	STAB2	123	347	13	457	4	9	1.1	-3.3	3.3	0.471	30.77	26.04	1.25	1	4	0.95	0.95	1
LUSC	POLG	91	273	10	354	1	9	-1.47	-5.86	1.47	0.951	10	25.42	0.33	1	1	0.278	0.951	1
LUSC	MAN2C1	56	407	5	458	2	3	4.06	0	4.06	0.0953	40	11.79	4.85	2	3	0.957	0.957	1
LUSC	TSC2	77	245	11	311	1	10	-3.41	-7.68	1.71	0.967	9.09	24.44	0.32	1	1	0.254	0.967	1
LUSC	CACNB2	80	300	6	374	2	4	1.58	-1.58	3.17	0.367	33.33	20.86	1.88	1	3	0.973	0.973	1
LUSC	FLNB	244	196	14	426	10	4	1.84	-0.92	5.52	0.159	71.43	54.93	2.01	5	3	0.978	0.978	1
LUSC	COL6A3	159	302	15	446	2	13	-2.88	-6.72	0	0.989	13.33	35.2	0.29	1	1	0.288	0.989	1
LUSC	ABCC8	140	330	7	463	4	3	2.03	0	4.07	0.0854	57.14	29.37	3.14	1	2	0.993	0.993	1
LUSC	KCNH6	124	344	9	459	7	2	4.39	1.65	7.13	0.00384	77.78	25.49	9.71	4	2	0.995	0.995	1
LUSC	STAB1	303	167	9	461	7	2	0.93	-1.39	3.72	0.392	77.78	64.21	1.93	1	1	0.996	0.996	1
LUSC	GNPTG	107	362	8	461	5	3	3.63	1.21	6.05	0.0143	62.5	22.13	5.64	1	2	0.997	0.997	1
LUSC	SCFD1	50	224	6	268	0	6	-2.45	-7.34	0	1	0	18.66	0	0	2	1	1	1
LUSC	KRT32	130	340	6	464	3	3	1.06	-1.06	3.19	0.236	50	27.37	2.62	0	2	1	1	1
LUSC	CLDN14	48	255	5	298	1	4	0	-3.71	2.48	0.582	20	15.77	1.33	0	2	1	1	1
LUSC	CPT2	100	337	9	428	2	7	0	-3.89	2.59	0.666	22.22	22.9	0.96	0	3	1	1	1
LUSC	SLC12A3	118	352	6	464	2	4	1.13	-1.13	2.26	0.327	33.33	25	1.49	0	2	1	1	1
LUSC	CACNA1S	94	376	14	456	0	14	-3.99	-7.98	0	1	0	20.61	0	0	2	1	1	1
LUSC	FLCN	214	234	6	442	4	2	0.89	-0.89	2.68	0.321	66.67	47.51	2.19	1	2	1	1	1
LUSC	CORIN	136	333	5	464	3	2	1.04	-1.04	3.11	0.356	60	28.66	3.67	0	0	1	1	1
LUSC	TYR	49	381	11	419	1	10	0	-4.61	2.3	0.701	9.09	11.46	0.78	0	2	1	1	1
LUSC	MATN1	98	308	5	401	0	5	-1.35	-4.04	0	1	0	24.44	0	0	1	1	1	1
LUSC	INO80	66	403	5	464	0	5	-1.76	-4.41	0	1	0	14.22	0	0	3	1	1	1
LUSC	NOX3	74	390	8	456	1	7	0	-3.22	1.61	0.733	12.5	16.01	0.75	0	2	1	1	1
LUSC	SPG11	51	321	5	367	0	5	-2.27	-5.68	0	1	0	13.9	0	0	2	1	1	1
LUSC	THBS1	81	238	6	313	1	5	0	-4.14	1.65	0.771	16.67	25.56	0.59	0	2	1	1	1
LUSC	DST	91	379	7	463	1	6	0	-4.09	1.36	0.827	14.29	19.44	0.69	0	2	1	1	1
LUSC	HMCN1	79	391	5	465	1	4	0	-2.28	1.52	0.583	20	16.77	1.24	0	1	1	1	1
LUSC	COL22A1	131	339	9	461	0	9	-2.12	-5.29	0	1	0	28.42	0	0	3	1	1	1
LUSC	BTD	102	177	6	273	3	3	1.55	-2.32	3.09	0.485	50	36.26	1.74	0	2	1	1	1
LUSC	KRT13	183	287	6	464	3	3	0.89	-1.34	2.68	0.401	50	38.79	1.57	0	1	1	1	1
LUSC	NSD1	160	310	8	462	4	4	0.95	-0.95	3.79	0.248	50	33.77	1.94	0	2	1	1	1
LUSC	MYH11	121	346	11	456	1	10	-2.23	-5.58	1.12	0.96	9.09	26.32	0.29	0	4	1	1	1
LUSC	POLQ	68	402	5	465	1	4	0	-3.44	1.72	0.618	20	14.41	1.48	0	1	1	1	1
LUSC	LAMA3	84	386	10	461	2	7	0	-3.62	2.9	0.638	20	17.79	1.31	0	4	1	1	1
LUSC	MSH6	73	397	5	465	1	4	0	-2.43	1.62	0.565	20	15.48	1.36	0	2	1	1	1
LUSC	ACADSB	51	243	5	289	0	5	-2.37	-5.93	0	1	0	17.65	0	0	2	1	1	1
LUSC	CP	143	327	6	464	2	4	0	-2.01	2.01	0.635	33.33	30.39	1.14	0	2	1	1	1
LUSC	ABCA4	175	295	9	461	1	8	-1.82	-4.55	0.46	0.979	11.11	37.74	0.21	0	2	1	1	1
LUSC	ABCA3	54	414	8	460	0	8	-2.09	-6.28	0	1	0	11.74	0	0	3	1	1	1
LUSC	CNTNAP2	66	385	5	446	0	5	-1.77	-4.44	0	1	0	14.8	0	0	2	1	1	1
LUSC	HAL	95	375	13	457	3	10	1.32	-3.3	3.96	0.456	23.08	20.13	1.18	0	2	1	1	1
LUSC	CPT1A	48	422	6	464	1	5	0	-3.48	2.32	0.545	16.67	10.13	1.76	0	2	1	1	1
LUSC	BFSP2	61	379	6	434	0	6	-1.9	-4.76	0	1	0	14.06	0	0	3	1	1	1
LUSC	SCN1A	62	372	6	428	2	4	1.88	-1.88	3.76	0.218	33.33	14.02	3	0	0	1	1	1
LUSC	EEPD1	54	416	6	464	1	5	0	-3.14	2.09	0.531	16.67	11.42	1.54	0	2	1	1	1
OV	BRCA1	177	129	34	273	32	1	16.08	9.38	23.45	0	94.12	53.11	23.32	30	0	2.06e-15	2.06e-15	1.7304e-13
OV	BRCA2	186	175	24	337	20	4	7.76	3.33	13.31	0.000934	83.33	49.26	4.7	19	2	0.000111	0.000934	0.039228
OV	ANK2	103	258	9	352	7	2	5.43	2.04	9.51	0.00334	77.78	27.27	8.77	5	0	0.00461	0.00461	0.12908
OV	NSD1	88	273	17	344	8	9	6.01	1.5	10.52	0.0149	47.06	23.26	2.76	5	1	0.00563	0.0149	0.3129
OV	TPCN2	64	296	7	354	4	2	5.7	1.9	7.6	0.0155	57.14	16.95	9.25	3	0	0.0355	0.0355	0.5964
OV	ABCA8	165	186	7	344	6	1	3.43	0	5.72	0.043	85.71	46.22	6.76	4	0	0.0706	0.0706	0.9884
OV	DNAH8	156	205	5	356	4	1	2.26	0	4.52	0.0904	80	42.7	5.26	3	0	0.104	0.104	1
OV	MASP2	98	253	7	344	4	3	2.83	-0.71	5.66	0.132	57.14	27.33	3.44	3	0	0.0161	0.132	1
OV	ABCA1	144	217	6	355	4	2	2.31	-0.58	4.62	0.139	66.67	39.44	3.01	4	0	0.00334	0.139	1
OV	MYH3	157	192	5	344	4	1	2.32	-0.58	4.63	0.158	80	44.48	4.89	4	0	0.0156	0.158	1
OV	ABCA10	187	174	11	351	7	3	2.22	-1.11	5.55	0.167	63.64	51.28	2.17	4	0	0.0112	0.167	1
OV	BRIP1	187	173	4	356	4	0	2.23	0	4.45	0.0757	100	51.4	0	4	0	0.188	0.188	1
OV	NLRP8	150	206	4	352	3	1	1.15	-1.15	3.46	0.21	75	41.76	4.12	3	0	0.0508	0.21	1
OV	KRT28	213	148	8	353	6	2	2.29	-1.15	4.58	0.222	75	58.64	2.08	3	0	0.0958	0.222	1
OV	POLG	110	173	8	275	4	4	1.49	-1.49	5.95	0.256	50	38.55	1.57	3	0	0.00856	0.256	1
OV	DYSF	95	266	10	351	4	6	1.43	-2.86	5.71	0.297	40	25.93	1.87	3	0	0.00327	0.297	1
OV	SCN11A	87	274	9	352	4	5	3.03	-1.51	6.06	0.14	44.44	23.58	2.52	4	3	0.309	0.309	1
OV	FOXN1	196	163	3	356	3	0	1.12	0	3.37	0.17	100	54.21	0	3	0	0.312	0.312	1
OV	LRP1B	157	204	11	350	6	5	1.13	-2.25	4.51	0.297	54.55	43.14	1.56	4	2	0.323	0.323	1
OV	LPO	176	145	5	316	5	0	2.52	0	5.03	0.064	100	54.11	0	4	0	0.344	0.344	1
OV	FLCN	196	159	4	351	3	1	1.14	-1.14	3.42	0.362	75	54.99	2.43	3	0	0.0508	0.362	1
OV	HK3	81	272	13	340	4	9	1.6	-3.2	5.61	0.362	30.77	22.65	1.49	2	1	0.165	0.362	1
OV	PYGM	56	305	8	353	2	6	2.11	-3.17	4.23	0.372	25	15.3	1.82	2	1	0.118	0.372	1
OV	KRT38	235	126	3	358	3	0	1.22	0	3.05	0.375	100	64.8	0	3	0	0.312	0.375	1
OV	ABCA9	173	188	10	352	5	4	1.11	-2.22	4.44	0.377	50	47.73	1.36	5	0	5.5e-05	0.377	1
OV	COL14A1	163	194	6	352	3	2	1.13	-1.13	3.39	0.378	50	45.45	1.79	3	1	0.312	0.378	1
OV	LAMA4	164	197	5	356	3	2	1.12	-1.68	3.35	0.463	60	45.22	1.8	3	0	0.0162	0.463	1
OV	MYH2	105	156	9	253	4	4	1.59	-3.19	4.78	0.48	44.44	39.92	1.49	1	0	0.41	0.48	1
OV	SLC7A2	119	236	8	347	3	5	1.26	-2.53	3.79	0.488	37.5	33.43	1.19	2	1	0.262	0.488	1
OV	TAF15	110	82	4	188	4	0	4.26	0	7.45	0.126	100	56.38	0	3	0	0.5	0.5	1
OV	MYH1	98	259	4	353	2	2	1.41	-1.41	2.81	0.327	50	27.2	2.64	2	1	0.5	0.5	1
OV	ABCC2	112	249	6	355	4	2	2.59	-0.65	5.18	0.119	66.67	30.42	4.45	3	1	0.5	0.5	1
OV	ACACB	195	166	11	351	6	4	0	-2.79	3.9	0.507	54.55	53.85	1.28	4	1	0.126	0.507	1
OV	LRP1	103	257	10	350	4	6	2.72	-1.36	5.44	0.233	40	28.29	1.66	2	2	0.585	0.585	1
OV	FBN2	150	211	12	349	5	7	0	-3.42	3.42	0.594	41.67	41.55	1	2	1	0.314	0.594	1
OV	SLC7A14	45	302	7	340	1	6	0	-5.11	2.55	0.598	14.29	12.94	1.12	1	2	0.587	0.598	1
OV	COL2A1	123	237	7	353	4	3	2.47	-1.23	4.94	0.206	57.14	33.71	2.57	2	1	0.619	0.619	1
OV	CDH3	160	196	4	352	2	2	0	-2.27	2.27	0.625	50	44.89	1.23	2	1	0.5	0.625	1
OV	SI	100	260	14	346	4	10	0	-4.85	4.15	0.655	28.57	27.75	1.04	4	2	0.0109	0.655	1
OV	CSF2RA	177	184	6	356	5	0	3.33	0.55	4.99	0.0272	83.33	48.31	0	3	0	0.656	0.656	1
OV	KRT24	133	124	5	252	5	0	3.12	0	7.01	0.031	100	50.79	0	3	0	0.656	0.656	1
OV	CACNA1D	119	242	6	355	2	4	0	-2.51	2.51	0.634	33.33	32.96	1.02	1	1	0.657	0.657	1
OV	MYH8	162	199	4	357	2	2	0	-2.24	2.24	0.674	50	44.82	1.23	2	1	0.5	0.674	1
OV	SLC12A9	142	219	5	356	2	3	0	-2.32	2.32	0.577	40	39.33	1.03	2	2	0.684	0.684	1
OV	PDE6A	66	205	6	266	3	2	4.01	0	6.01	0.0615	50	23.68	4.66	2	1	0.688	0.688	1
OV	MYH4	145	125	10	260	5	5	0	-4.47	4.47	0.689	50	53.85	0.86	3	0	0.00955	0.689	1
OV	SYNJ2	151	207	8	350	3	5	0	-3.44	2.29	0.717	37.5	42.29	0.82	2	1	0.262	0.717	1
OV	COL22A1	185	176	8	353	5	3	1.11	-2.22	3.88	0.39	62.5	50.99	1.59	2	1	0.726	0.726	1
OV	SRCAP	50	311	7	355	1	5	0	-4.64	2.32	0.734	14.29	13.8	1.24	1	1	0.438	0.734	1
OV	WFS1	86	260	6	340	1	5	0	-3.09	1.55	0.778	16.67	25	0.6	1	0	0.16	0.778	1
OV	GCKR	70	243	7	306	1	6	0	-4.6	1.84	0.78	14.29	22.55	0.58	1	2	0.587	0.78	1
OV	C6	42	319	6	355	2	4	2.69	-2.69	5.39	0.21	33.33	11.27	3.8	2	3	0.784	0.784	1
OV	DAAM1	121	240	4	357	1	3	0	-2.49	1.24	0.8	25	33.61	0.66	1	1	0.609	0.8	1
OV	SACS	172	189	10	351	4	6	-1.11	-4.44	2.22	0.808	40	47.86	0.73	3	0	0.00327	0.808	1
OV	TSC2	64	155	7	212	2	5	-2.21	-6.62	3.31	0.835	28.57	29.25	0.97	2	3	0.624	0.835	1
OV	ECEL1	61	300	3	358	2	1	3.95	0	3.95	0.064	66.67	16.48	9.84	2	1	0.844	0.844	1
OV	UCP1	40	129	3	166	2	1	3.28	-3.28	6.55	0.39	66.67	22.89	6.45	2	1	0.844	0.844	1
OV	F10	109	251	3	357	2	1	1.32	0	2.63	0.179	66.67	29.97	4.61	2	1	0.844	0.844	1
OV	GH2	237	123	4	356	2	2	-1.23	-2.47	1.23	0.85	50	66.01	0.52	2	1	0.5	0.85	1
OV	EP300	189	172	7	354	7	0	3.33	1.11	6.66	0.00946	100	51.41	0	3	0	0.855	0.855	1
OV	PMM2	90	270	4	356	1	3	0	-2.96	1.48	0.659	25	25	1	1	2	0.859	0.859	1
OV	LRP2	155	206	14	347	5	9	-1.13	-5.65	2.26	0.865	35.71	43.23	0.74	1	1	0.623	0.865	1
OV	COL27A1	195	166	7	354	3	4	-1.12	-3.35	1.67	0.866	42.86	54.24	0.64	2	1	0.348	0.866	1
OV	CAPN3	86	122	6	202	2	4	-1.98	-5.95	2.97	0.851	33.33	41.58	0.71	1	2	0.875	0.875	1
OV	RPGRIP1L	53	134	6	181	2	4	2.63	-5.27	5.27	0.473	33.33	28.18	1.26	1	2	0.875	0.875	1
OV	CP	107	254	6	355	2	4	1.33	-1.33	2.66	0.377	33.33	29.58	1.19	1	2	0.875	0.875	1
OV	RYR1	145	216	9	352	5	4	2.31	-1.73	4.61	0.249	55.56	39.77	1.86	1	1	0.882	0.882	1
OV	FBN3	221	140	10	352	4	5	-1.17	-4.67	1.75	0.91	40	61.65	0.51	3	1	0.104	0.91	1
OV	ITPR3	167	194	10	351	3	7	-2.23	-5.57	1.11	0.919	30	46.72	0.5	2	1	0.162	0.919	1
OV	MYO1C	200	161	3	358	3	0	1.12	0	3.36	0.174	100	55.03	0	1	0	0.938	0.938	1
OV	HADHA	52	309	5	356	2	3	2.25	-2.25	4.49	0.19	40	14.04	3.96	1	2	0.947	0.947	1
OV	CNGA2	144	177	5	317	3	1	1.26	-1.26	3.78	0.23	60	44.48	3.69	2	1	0.949	0.949	1
OV	F5	111	250	8	353	1	7	-1.3	-5.2	1.3	0.956	12.5	31.16	0.32	1	1	0.34	0.956	1
OV	NALCN	240	121	5	356	2	3	-1.24	-3.73	0.62	0.971	40	66.85	0.34	1	1	0.756	0.971	1
OV	CACNB2	58	243	3	298	1	2	2.14	-2.14	2.14	0.469	33.33	19.13	2.09	1	2	0.972	0.972	1
OV	MAP3K9	115	241	4	352	2	2	1.28	-1.28	2.57	0.405	50	32.1	2.1	1	2	0.995	0.995	1
OV	LTK	162	199	5	356	2	3	0	-2.24	2.24	0.774	40	44.94	0.82	1	3	0.998	0.998	1
OV	HABP2	135	226	6	355	4	2	2.37	-1.18	4.73	0.17	66.67	36.9	3.35	1	2	1	1	1
OV	SCN10A	103	258	13	349	1	11	-2.72	-7.47	0	0.988	7.69	29.23	0.23	0	2	1	1	1
OV	PSEN2	51	288	6	333	1	5	0	-4.62	2.31	0.621	16.67	15.02	1.13	0	3	1	1	1
OV	MYH9	118	241	5	354	2	3	0	-2.52	2.52	0.539	40	32.77	1.36	0	1	1	1	1
OV	ITGB5	55	177	5	228	0	4	0	-4.77	0	1	0	24.12	0	0	3	1	1	1
OV	TENC1	65	278	8	335	0	8	-1.9	-7.59	0	1	0	19.4	0	0	3	1	1	1
OV	ABCC6	99	261	6	354	0	6	-1.39	-5.57	0	1	0	27.97	0	0	3	1	1	1
PRAD	FBN3	44	412	15	441	6	9	12.58	6.29	15.09	0.000592	40	8.62	6.24	2	1	0.283	0.283	1
PRAD	LRP1B	81	376	18	439	4	14	1.5	-3	6	0.348	22.22	17.54	1.33	2	2	0.196	0.348	1
PRAD	MYH3	43	399	7	435	3	4	7.73	2.58	7.73	0.0176	42.86	9.2	6.96	2	1	0.348	0.348	1
PRAD	MYOM2	175	282	3	454	2	1	0.93	-0.93	1.85	0.357	66.67	38.11	3.22	1	0	0.578	0.578	1
PRAD	COL19A1	73	384	6	451	1	5	0	-3.26	1.63	0.586	16.67	15.96	1.05	1	1	0.438	0.586	1
PRAD	SPG7	68	350	5	413	1	4	0	-2.63	1.76	0.587	20	16.22	1.29	1	1	0.51	0.587	1
PRAD	ZFHX3	84	372	4	452	1	3	0	-1.46	1.46	0.574	25	18.36	1.48	1	1	0.609	0.609	1
PRAD	SLC7A2	84	367	7	444	1	6	0	-2.93	1.46	0.761	14.29	18.69	0.73	1	2	0.587	0.761	1
PRAD	LRP2	58	399	22	435	2	20	-1.97	-7.9	3.95	0.783	9.09	12.87	0.69	1	3	0.421	0.783	1
PRAD	LAMA1	92	364	3	453	3	0	2.72	1.36	4.09	0.00898	100	19.65	0	1	0	0.938	0.938	1
PRAD	COL10A1	44	411	3	452	1	2	2.52	-2.52	2.52	0.367	33.33	9.51	4.67	1	2	0.972	0.972	1
PRAD	ACADVL	76	339	8	407	3	5	1.61	-1.61	4.83	0.202	37.5	17.94	2.68	0	2	1	1	1
PRAD	RBL2	52	309	8	353	1	7	-2.25	-6.74	2.25	0.886	12.5	14.45	0.85	0	3	1	1	1
PRAD	STAB2	47	409	15	441	0	15	-2.37	-9.49	0	1	0	10.66	0	0	2	1	1	1
PRAD	RYR1	50	406	12	444	1	11	0	-6.74	2.25	0.75	8.33	11.04	0.74	0	4	1	1	1
PRAD	MYO1C	46	410	5	451	0	5	0	-4.84	0	1	0	10.2	0	0	2	1	1	1
PRAD	COL22A1	64	393	7	450	1	6	0	-3.63	1.82	0.752	14.29	14	1.02	0	2	1	1	1
PRAD	NALCN	56	400	6	450	0	6	0	-4.07	0	1	0	12.44	0	0	2	1	1	1
PRAD	TG	73	384	5	452	1	4	0	-1.63	1.63	0.526	20	15.93	1.32	0	0	1	1	1
PRAD	COL9A1	61	388	9	440	0	9	-1.9	-5.69	0	1	0	13.86	0	0	2	1	1	1
SKCM	CSF2RA	106	349	7	448	4	3	2.46	0	4.92	0.0571	57.14	22.77	4.39	4	0	0.0011	0.0571	0.938839
SKCM	COL27A1	217	238	9	446	7	2	2.64	0	4.85	0.0793	77.78	47.09	3.84	5	0	0.00461	0.0793	0.938839
SKCM	LRP2	117	338	23	432	9	14	3.45	-1.73	7.48	0.126	39.13	25	1.86	4	2	0.0697	0.126	0.938839
SKCM	LRP1	79	376	8	447	3	5	3.06	-1.53	4.6	0.138	37.5	17	2.86	3	0	0.00217	0.138	0.938839
SKCM	BRCA1	51	323	7	367	2	5	2.27	-1.14	4.54	0.146	28.57	13.35	2.53	2	1	0.156	0.156	0.938839
SKCM	CFTR	55	288	20	323	5	15	4.33	-4.33	8.66	0.253	25	15.48	1.75	4	3	0.0234	0.253	0.938839
SKCM	SETX	101	354	8	447	3	5	1.27	-1.27	3.82	0.262	37.5	21.92	2.1	2	1	0.262	0.262	0.938839
SKCM	SBNO1	68	387	7	448	2	5	1.73	-1.73	3.46	0.27	28.57	14.73	2.28	2	1	0.156	0.27	0.938839
SKCM	ABCC11	56	318	7	367	2	5	2.1	-2.1	4.2	0.334	28.57	14.71	2.27	2	1	0.156	0.334	0.938839
SKCM	FBN3	118	337	11	444	4	7	1.14	-2.29	4	0.347	36.36	25.68	1.63	2	1	0.237	0.347	0.938839
SKCM	ABCC12	56	399	10	445	2	8	2.04	-3.05	4.07	0.365	20	12.13	1.78	2	3	0.336	0.365	0.938839
SKCM	COL22A1	122	333	9	446	4	5	2.24	-1.12	4.48	0.196	44.44	26.46	2.18	2	1	0.367	0.367	0.938839
SKCM	SCN10A	77	378	15	440	3	12	1.56	-3.91	4.69	0.451	20	16.82	1.23	2	2	0.169	0.451	0.938839
SKCM	COL5A1	190	265	11	444	5	6	0	-2.71	3.16	0.523	45.45	41.67	1.16	2	1	0.38	0.523	0.938839
SKCM	COL14A1	112	337	7	442	2	5	0	-2.38	2.38	0.546	28.57	24.89	1.2	2	1	0.156	0.546	0.938839
SKCM	CRB1	49	406	7	448	1	6	0	-3.43	2.29	0.525	14.29	10.71	1.38	1	2	0.587	0.587	0.938839
SKCM	SLC45A2	48	407	7	448	1	6	0	-3.49	2.33	0.526	14.29	10.49	1.41	1	2	0.587	0.587	0.938839
SKCM	SLC5A10	57	376	7	426	1	6	0	-4.04	2.02	0.633	14.29	13.15	1.1	1	2	0.587	0.633	0.938839
SKCM	OTOF	66	389	7	448	1	6	0	-3.54	1.77	0.674	14.29	14.51	0.98	1	2	0.587	0.674	0.938839
SKCM	ATP1A4	132	323	9	447	3	5	1.07	-2.13	3.2	0.412	33.33	28.86	1.47	1	1	0.684	0.684	0.938839
SKCM	APC	79	353	7	425	1	6	0	-3.1	1.55	0.726	14.29	18.35	0.74	1	2	0.587	0.726	0.938839
SKCM	STAB2	131	324	7	448	2	5	0	-3.22	2.14	0.734	28.57	28.79	0.99	2	2	0.376	0.734	0.938839
SKCM	MYH6	106	347	8	445	2	6	0	-3.08	2.46	0.637	25	23.37	1.09	1	2	0.734	0.734	0.938839
SKCM	SYNJ2	152	297	9	440	6	3	2.98	0	5.47	0.045	66.67	33.18	3.91	4	2	0.757	0.757	0.938839
SKCM	MYO1C	106	349	7	448	3	4	1.23	-1.23	3.69	0.21	42.86	22.99	2.47	1	1	0.76	0.76	0.938839
SKCM	ACACB	107	348	12	443	2	10	-1.22	-4.28	2.44	0.788	16.67	23.7	0.65	1	3	0.683	0.788	0.938839
SKCM	COL1A1	91	364	7	448	2	5	1.37	-2.06	2.75	0.37	28.57	19.87	1.6	1	2	0.802	0.802	0.938839
SKCM	LRP1B	121	334	20	436	4	15	-1.13	-5.63	2.25	0.805	20	26.83	0.74	1	3	0.709	0.805	0.938839
SKCM	COL6A3	92	357	13	436	2	11	-1.37	-5.47	2.73	0.807	15.38	20.64	0.71	1	2	0.504	0.807	0.938839
SKCM	UNC13B	47	203	9	241	1	8	-2.62	-7.86	2.62	0.837	11.11	19.09	0.54	1	2	0.478	0.837	0.938839
SKCM	RYR1	97	358	17	438	4	13	1.31	-3.28	4.59	0.434	23.53	21.23	1.14	1	4	0.856	0.856	0.938839
SKCM	LRP5	60	395	8	447	1	7	0	-3.84	1.92	0.7	12.5	13.2	0.94	0	4	1	1	1
SKCM	ABCA12	53	402	7	448	0	7	-2.14	-5.34	0	1	0	11.83	0	0	4	1	1	1
SKCM	ABCC3	64	391	9	446	1	8	0	-3.64	1.82	0.649	11.11	14.13	0.76	0	1	1	1	1
STAD	ACACB	80	291	9	362	4	5	3.19	-0.8	6.37	0.108	44.44	20.99	2.91	3	1	0.104	0.108	1
STAD	FLNB	84	272	13	343	5	8	3.12	-1.56	7.79	0.132	38.46	23.03	2.02	4	0	0.00013	0.132	1
STAD	TSC2	37	205	9	233	3	6	3.19	-3.19	9.57	0.251	33.33	14.59	2.77	2	1	0.203	0.251	1
STAD	STAB1	115	256	10	361	4	6	1.26	-2.52	3.78	0.421	40	30.75	1.48	2	1	0.292	0.421	1
STAD	FBN3	136	235	11	360	5	6	1.16	-2.32	4.64	0.422	45.45	36.39	1.44	2	0	0.0631	0.422	1
STAD	DISP1	59	312	9	362	2	7	2.02	-4.03	4.03	0.437	22.22	15.75	1.51	2	0	0.0112	0.437	1
STAD	RYR1	119	252	22	349	7	15	0	-4.95	4.95	0.584	31.82	32.09	0.99	3	2	0.116	0.584	1
STAD	WFS1	48	302	10	340	4	6	7.24	1.21	9.66	0.0247	40	12.94	4.19	2	2	0.585	0.585	1
STAD	UNC13B	28	187	10	205	2	8	4.11	-6.16	8.21	0.367	20	12.68	1.67	1	2	0.623	0.623	1
STAD	LRP1B	112	259	13	358	4	9	0	-4.48	3.84	0.628	30.77	30.17	1.03	2	1	0.165	0.628	1
STAD	NSD1	58	313	11	360	4	7	4.09	0	8.17	0.066	36.36	15	3.08	1	1	0.646	0.646	1
STAD	ABCA4	88	283	11	360	2	9	0	-4.47	2.98	0.747	18.18	23.89	0.71	1	2	0.578	0.747	1
STAD	LRP2	109	262	16	355	4	12	-1.3	-6.5	2.6	0.841	25	29.58	0.8	3	4	0.229	0.841	1
STAD	LRP1	75	296	11	360	4	7	3.34	-1.67	6.68	0.177	36.36	19.72	2.26	1	2	0.846	0.846	1
STAD	COL5A3	142	229	11	360	2	9	-1.14	-4.56	1.14	0.921	18.18	38.89	0.36	1	1	0.386	0.921	1
STAD	SCN10A	101	270	13	358	2	11	-2.72	-6.8	1.36	0.933	15.38	27.65	0.49	1	1	0.33	0.933	1
STAD	KCNH6	61	309	13	357	4	9	3.93	-1.96	7.85	0.186	30.77	15.97	2.25	1	4	0.95	0.95	1
STAD	ITPR3	108	263	12	359	1	11	-2.61	-6.53	0.65	0.979	8.33	29.81	0.22	1	2	0.373	0.979	1
STAD	ABCB4	41	330	9	362	0	9	-2.74	-8.23	0	1	0	11.33	0	0	2	1	1	1
STAD	ABCC2	45	326	13	358	0	13	-2.53	-10.12	0	1	0	12.57	0	0	3	1	1	1
THCA	MOV10L1	51	373	4	420	1	3	2.23	-2.23	2.23	0.37	25	11.9	2.44	1	0	0.234	0.37	1
THCA	CELSR1	42	382	5	419	1	4	2.64	-2.64	2.64	0.402	20	9.79	2.27	1	0	0.19	0.402	1
THCA	ALG12	36	388	2	422	1	1	3.04	0	3.04	0.104	50	8.29	10.78	1	0	0.438	0.438	1
THCA	EFCAB6	55	369	2	422	1	1	2.09	0	2.09	0.222	50	12.8	6.71	1	0	0.438	0.438	1
THCA	KRT75	47	377	4	420	1	3	2.39	-2.39	2.39	0.301	25	10.95	2.67	0	1	1	1	1
THCA	CECR1	38	369	2	405	0	2	0	-2.9	0	1	0	9.38	0	0	1	1	1	1
THCA	SCUBE1	44	380	3	421	0	3	0	-5.07	0	1	0	10.45	0	0	1	1	1	1
THCA	TTC3	38	385	2	421	1	1	2.89	0	2.89	0.178	50	8.79	10.13	0	1	1	1	1
THCA	DNAH5	62	362	7	417	0	7	-1.89	-5.67	0	1	0	14.87	0	0	1	1	1	1
THCA	RYR1	33	391	14	410	2	12	3.29	-3.29	6.57	0.29	14.29	7.56	1.97	0	5	1	1	1
THCA	PKDREJ	36	246	2	280	0	2	0	-3.18	0	1	0	12.86	0	0	1	1	1	1
THCA	C1QTNF6	61	358	2	417	0	2	0	-1.92	0	1	0	14.63	0	0	1	1	1	1
THCA	NEFH	49	375	4	420	0	4	0	-4.61	0	1	0	11.67	0	0	2	1	1	1
THCA	LZTR1	57	367	5	419	0	5	-2.03	-4.05	0	1	0	13.6	0	0	2	1	1	1
THCA	EWSR1	37	387	2	422	0	2	0	-2.96	0	1	0	8.77	0	0	1	1	1	1
THCA	APOL1	39	385	2	422	0	2	0	-4.24	0	1	0	9.24	0	0	1	1	1	1
UCEC	TPCN2	46	400	6	440	3	3	7.27	2.42	7.27	0.00864	50	9.77	8.7	3	0	0.00708	0.00864	0.42336
UCEC	COL17A1	154	292	12	435	7	4	2.98	0	5.95	0.0556	58.33	33.79	3.32	4	0	0.00502	0.0556	1
UCEC	ANK2	53	393	14	432	4	10	4.28	0	8.56	0.0632	28.57	11.34	2.97	3	3	0.188	0.188	1
UCEC	ABCA7	104	342	14	434	4	8	2.51	-1.25	5.02	0.154	28.57	23.04	1.64	2	1	0.196	0.196	1
UCEC	ABCA8	50	374	9	416	3	5	4.53	0	6.8	0.0471	33.33	11.3	4.49	3	2	0.199	0.199	1
UCEC	SACS	46	400	16	431	6	9	9.7	4.85	14.54	0.00323	37.5	9.28	5.8	3	2	0.244	0.244	1
UCEC	ITPR3	65	381	7	439	2	5	1.8	-1.8	3.6	0.319	28.57	14.35	2.34	2	1	0.156	0.319	1
UCEC	CDAN1	39	205	3	241	1	2	3.05	-3.05	3.05	0.39	33.33	15.77	2.63	1	0	0.306	0.39	1
UCEC	ZFHX3	90	356	7	439	2	5	1.39	-2.09	2.78	0.415	28.57	20.05	1.58	2	1	0.156	0.415	1
UCEC	SLC26A9	67	236	8	295	2	6	1.92	-3.83	3.83	0.476	25	22.03	1.17	2	2	0.292	0.476	1
UCEC	ASPA	120	326	6	440	4	2	2.28	0	4.56	0.0517	66.67	26.36	5.43	3	1	0.5	0.5	1
UCEC	DNAH3	64	382	12	434	2	10	0	-3.65	3.65	0.505	16.67	14.29	1.19	2	2	0.131	0.505	1
UCEC	MYH3	85	349	11	423	3	8	1.46	-1.46	4.39	0.272	27.27	19.39	1.54	2	3	0.506	0.506	1
UCEC	ALOXE3	113	332	6	439	2	4	0	-2.37	2.37	0.532	33.33	25.28	1.47	2	1	0.216	0.532	1
UCEC	MYH4	73	256	15	314	4	11	0	-5.28	5.28	0.539	26.67	21.97	1.28	3	2	0.0645	0.539	1
UCEC	WFS1	43	377	7	413	2	5	2.59	-1.3	5.18	0.14	28.57	9.93	3.51	1	1	0.578	0.578	1
UCEC	SCN11A	53	393	7	439	1	6	0	-2.14	2.14	0.51	14.29	11.85	1.24	1	2	0.587	0.587	1
UCEC	FBN1	46	400	4	442	1	3	0	-2.42	2.42	0.509	25	10.18	2.9	1	1	0.609	0.609	1
UCEC	MSH6	44	402	8	438	1	7	0	-5.04	2.52	0.611	12.5	9.82	1.31	1	2	0.527	0.611	1
UCEC	LRP1B	81	365	18	428	3	15	0	-5.28	3.77	0.643	16.67	18.22	0.9	1	2	0.493	0.643	1
UCEC	APC	43	390	11	422	1	10	0	-5.16	2.58	0.687	9.09	9.95	0.91	1	3	0.535	0.687	1
UCEC	GLDC	49	377	8	418	2	6	2.31	-2.31	4.61	0.292	25	11.24	2.56	1	2	0.734	0.734	1
UCEC	SLC4A7	42	401	6	438	1	4	2.63	-2.63	2.63	0.49	16.67	9.36	2.39	1	2	0.75	0.75	1
UCEC	MYH9	58	388	4	443	1	2	1.98	-1.98	1.98	0.398	25	12.87	3.34	1	1	0.75	0.75	1
UCEC	CTNS	92	354	3	443	1	2	0	-1.37	1.37	0.591	33.33	20.54	1.92	1	1	0.75	0.75	1
UCEC	HCN3	65	379	5	439	1	4	0	-2.7	1.8	0.557	20	14.58	1.46	1	2	0.75	0.75	1
UCEC	GNA14	42	277	5	314	1	4	0	-4.11	2.74	0.586	20	13.06	1.65	1	2	0.75	0.75	1
UCEC	SCN10A	62	384	22	425	2	19	0	-7.49	3.75	0.764	9.09	14.12	0.65	1	7	0.756	0.764	1
UCEC	THBS3	74	367	8	434	1	6	0	-4.06	1.62	0.773	12.5	16.82	0.83	1	2	0.587	0.773	1
UCEC	COL7A1	55	386	10	431	1	9	0	-6.23	2.08	0.82	10	12.53	0.78	1	4	0.698	0.82	1
UCEC	KIF14	77	368	3	442	2	1	3.14	0	3.14	0.104	66.67	16.97	9.56	2	1	0.844	0.844	1
UCEC	ALOX15B	104	340	4	441	2	1	1.26	0	2.51	0.179	50	23.13	6.54	2	1	0.844	0.844	1
UCEC	ADAT1	58	278	3	333	2	1	4.17	0	4.17	0.075	66.67	16.82	9.59	2	1	0.844	0.844	1
UCEC	COL27A1	114	332	10	436	2	8	0	-3.54	2.36	0.694	20	25.69	0.73	1	4	0.875	0.875	1
UCEC	CAPN9	88	339	6	421	2	4	1.43	-1.43	2.86	0.286	33.33	20.43	1.93	1	2	0.875	0.875	1
UCEC	PTCH2	47	292	8	331	2	6	2.47	-2.47	4.94	0.31	25	13.6	2.07	1	3	0.875	0.875	1
UCEC	STAB1	95	351	10	436	1	9	-1.34	-5.35	1.34	0.917	10	21.56	0.41	0	2	1	1	1
UCEC	LAMA1	91	355	6	440	0	6	-1.38	-4.14	0	1	0	20.68	0	0	2	1	1	1
UCEC	RYR1	76	370	22	425	3	18	0	-5.55	3.97	0.64	13.64	17.18	0.81	0	7	1	1	1
UCEC	CACNA1S	116	330	16	430	3	13	-1.17	-5.83	2.33	0.837	18.75	26.28	0.66	0	3	1	1	1
UCEC	SETX	55	391	10	436	2	8	2.07	-2.07	4.15	0.322	20	12.16	1.78	0	3	1	1	1
UCEC	PYGM	38	407	6	439	0	6	0	-5.75	0	1	0	8.66	0	0	3	1	1	1
UCEC	LTBP2	44	379	11	412	1	10	0	-5.07	2.54	0.702	9.09	10.44	0.86	0	2	1	1	1
UCEC	PKHD1	60	386	10	436	0	10	-1.93	-6.74	0	1	0	13.76	0	0	2	1	1	1
UCEC	ATP2B4	49	387	6	430	1	5	0	-3.45	2.3	0.548	16.67	11.16	1.58	0	3	1	1	1
UCEC	ABCC11	62	317	3	376	0	3	0	-3.86	0	1	0	16.49	0	0	1	1	1	1
UCEC	ATP1A4	122	324	7	439	3	4	1.13	-1.13	3.38	0.225	42.86	27.11	1.99	0	0	1	1	1
UCEC	COL1A2	41	387	5	423	0	5	0	-5.39	0	1	0	9.69	0	0	2	1	1	1
UCEC	FLNB	65	354	14	405	0	14	-3.64	-9.1	0	1	0	16.05	0	0	3	1	1	1
