# Supplementary material for: Systematic discovery of germline cancer predisposition genes through the identification of somatic second hits
Source: Nat Commun. 2018 Jul 4;9:2601. doi: 10.1038/s41467-018-04900-7 (PMC6031629; doi:10.1038/s41467-018-04900-7)
Supplement: Supplementary file 7 — Supplementary Data 5 [file 41467_2018_4900_MOESM7_ESM.xlsx]

## Sheet: Sheet1
Supplementary Data 5. ALFRED analysis in 17 individual cancer types for the ALFRED genes.
AI = samples with AI, noAI = samples without AI, RDGV = samples with RDGVs, noRDGV = samples without RDGVs, nPos = Number of samples with RDGVs in AI, nNeg = Number of samples with RDGVs in noAI, Excess = Excess of RDGVs in AI samples compared to noAI samples (%), Random P= Significance by randomization, AI in RDGV = samples with AI in samples with RDGVs (%), AI in noRDGV = samples with AI in sam…
Gene	Significantly enriched cancer type by ALFRED (FDR 20%)	Detected cancer type by ALFRED (P < 0.05)	BLCA_AI	BLCA_noAI	BLCA_RDGV	BLCA_noRDGV	BLCA_nPos	BLCA_nNeg	BLCA_Excess	BLCA_Lower_95CI	BLCA_Upper_95CI	BLCA_Random P	BLCA_AI in RDGV(%)	BLCA_AI in noRDGV(%)	BLCA_RR	BLCA_IncRDGV in AI	BLCA_incRDGV in noAI	BLCA_Binomial P	BLCA_ALFRED P	BRCA_AI	BRCA_noAI	BRCA_RDGV	BRCA_noRDGV	BRCA_nPos	BRCA_nNeg	BRCA_Excess	BRCA_Lower_95CI	BRCA_Upper_95CI	BRCA_Random P	BRCA_AI in RDGV(%)	BRCA_AI in noRDGV(%)	BRCA_RR	BRCA_IncRDGV in AI	BRCA_incRDGV in noAI	BRCA_Binomial P	BRCA_ALFRED P	CESC_AI	CESC_noAI	CESC_RDGV	CESC_noRDGV	CESC_nPos	CESC_nNeg	CESC_Excess	CESC_Lower_95CI	CESC_Upper_95CI	CESC_Random P	CESC_AI in RDGV(%)	CESC_AI in noRDGV(%)	CESC_RR
ATM	Pan, BRCA	BRCA, PRAD	66	295	3	358	1	2	1.85	-1.85	1.85	0.386	33.33	18.16	2.23	1	1	0.75	0.75	243	660	23	880	12	11	3.38	1.13	5.63	0.00346	52.17	26.25	2.96	10	3	0.000507	0.00346	57	180	5	232	2	3	2.31	-2.31	4.62	0.431	40	23.71	2.11
BRCA1	Pan, BRCA, OV	BRCA, OV	46	261	6	301	1	5	0	-5.11	2.56	0.653	16.67	14.95	1.13	0	1	1	1	213	558	37	734	18	19	5.19	1.95	8.43	0.00275	48.65	26.57	2.48	15	7	0.000281	0.00275	31	172	5	198	1	4	0	-7.61	3.81	0.607	20	15.15	1.39
BRCA2	Pan, BRCA, OV	BRCA, OV	60	301	3	358	1	2	2	-2	2	0.435	33.33	16.48	2.51	1	0	0.306	0.435	261	643	28	877	16	11	4.31	1.89	6.73	0.000686	57.14	27.94	3.58	12	3	0.000493	0.000686	54	183	1	236	0	1	0	-2.4	0	1	0	22.88	0
MYH1	Pan		67	293	7	353	2	5	1.83	-2.75	3.67	0.393	28.57	18.41	1.75	1	1	0.578	0.578	169	721	19	871	8	11	3.65	0.73	5.48	0.00849	42.11	18.48	3.1	5	4	0.217	0.217	17	218	3	232	0	3	0	-6.34	0	1	0	7.33	0
KCNG4	Pan		78	283	2	359	2	0	3.27	0	3.27	0.0533	100	21.17	0	1	0	0.875	0.875	329	573	5	897	3	2	0.48	-0.48	1.44	0.252	60	36.34	2.61	2	0	0.132	0.252	40	196	0	236	NA	NA	NA	NA	NA	NA	0	16.95	0
MNT	Pan		88	206	1	293	1	0	1.62	0	1.62	0.299	100	29.69	0	1	0	0.75	0.75	182	546	3	725	3	0	1.47	0.73	2.2	0.0123	100	24.69	0	2	0	0.688	0.688	35	147	0	182	NA	NA	NA	NA	NA	NA	0	19.23	0
NOP56	Pan		54	300	0	354	NA	NA	NA	NA	NA	NA	0	15.25	0	NA	NA	NA	NA	173	721	3	891	2	1	1.43	0	1.43	0.0993	66.67	19.19	8.34	1	0	0.578	0.578	55	181	0	236	NA	NA	NA	NA	NA	NA	0	23.31	0
NSD1	Pan	OV	77	284	10	351	3	7	1.65	-3.3	4.95	0.471	30	21.08	1.58	2	1	0.162	0.471	115	778	15	878	3	12	1	-2	2.99	0.368	20	12.76	1.69	3	0	0.000221	0.368	43	192	6	229	1	5	0	-5.69	2.85	0.733	16.67	18.34	0.89
TPCN2	Pan	OV, UCEC	68	293	6	355	2	4	1.81	-1.81	3.62	0.275	33.33	18.59	2.15	0	0	1	1	174	730	12	892	5	7	2.14	0	3.56	0.0389	41.67	18.95	3	4	3	0.235	0.235	44	193	7	230	1	6	0	-8.37	2.79	0.819	14.29	18.7	0.73
ANK2	Pan, OV	OV	43	318	7	354	1	6	0	-5.28	2.64	0.794	14.29	11.86	1.23	1	0	0.138	0.794	142	762	17	887	2	15	0	-2.51	1.67	0.709	11.76	15.78	0.72	0	5	1	1	41	196	1	236	0	1	0	-2.95	0	1	0	17.37	0
KCNH5	Pan		49	312	1	360	1	0	2.36	0	2.36	0.179	100	13.33	0	1	0	0.75	0.75	138	766	5	899	3	2	1.71	0	2.57	0.0393	60	15.02	8.33	1	1	0.938	0.938	18	219	4	233	2	2	12.02	0	12.02	0.0323	50	6.87	12.17
NIPAL3	Pan		37	276	2	311	1	1	3.07	0	3.07	0.176	50	11.58	7.46	1	0	0.438	0.438	122	664	8	778	3	5	1.94	-0.49	2.91	0.105	37.5	15.3	3.27	1	0	0.294	0.294	24	179	3	200	0	3	0	-4.73	0	1	0	12	0
PRPF8	Pan		137	217	2	352	0	2	-1.19	-2.38	0	1	0	38.92	0	0	0	1	1	345	508	6	847	4	2	0.97	-0.24	1.95	0.143	66.67	40.26	2.94	2	0	0.196	0.196	45	187	1	231	1	0	2.76	0	2.76	0.203	100	19.05	0
[truncated: 242 more columns]
