# Supplementary material for: Systematic discovery of germline cancer predisposition genes through the identification of somatic second hits
Source: Nat Commun. 2018 Jul 4;9:2601. doi: 10.1038/s41467-018-04900-7 (PMC6031629; doi:10.1038/s41467-018-04900-7)
Supplement: Supplementary file 8 — Supplementary Data 6 [file 41467_2018_4900_MOESM8_ESM.xlsx]

## Sheet: Sheet1
Supplementary Data 6. Case-control analyses for 17 individual cancer types for the ALFRED genes.
nPos = Number of samples with RDGVs in cases, nNeg = Number of samples with RDGVs in controls, Pvalue= Significance by case-control analysis, Excess = excess of RDGVs in case samples compared to control samples.
Gene	Significantly enriched cancer type by ALFRED (FDR 20%)	Detected cancer type by ALFRED (P < 0.05)	BLCA_nPos	BLCA_nNeg	BLCA_P	BLCA_Excess	BLCA_Lower_95CI	BLCA_Upper_95CI	BRCA_nPos	BRCA_nNeg	BRCA_P	BRCA_Excess	BRCA_Lower_95CI	BRCA_Upper_95CI	CESC_nPos	CESC_nNeg	CESC_P	CESC_Excess	CESC_Lower_95CI	CESC_Upper_95CI	COADREAD_nPos	COADREAD_nNeg	COADREAD_P	COADREAD_Excess	COADREAD_Lower_95CI	COADREAD_Upper_95CI	GBM_nPos	GBM_nNeg	GBM_P	GBM_Excess	GBM_Lower_95CI	GBM_Upper_95CI	HNSC_nPos	HNSC_nNeg	HNSC_P	HNSC_Excess	HNSC_Lower_95CI	HNSC_Upper_95CI	KIRC_nPos	KIRC_nNeg	KIRC_P	KIRC_Excess	KIRC_Lower_95CI	KIRC_Upper_95CI	LGG_nPos	LGG_nNeg	LGG_P	LGG_Excess	LGG_Lower_95CI
ATM	Pan, BRCA	Pan, BRCA, COADREAD, LUAD, PRAD	3	20	0.343	0.29	-0.59	0.88	21	20	6e-06	1.75	1.08	2.42	4	20	0.0657	1.24	0	1.65	8	20	0.00522	1.18	0.47	1.88	6	20	0.0409	0.89	0	1.77	5	20	0.177	0.45	-0.34	1.13	1	20	0.841	-0.32	-1.13	0.32	4	20	0.328	0.23	-0.47
BRCA1	Pan, BRCA, OV	Pan, BRCA, OV, PRAD	5	57	0.555	0	-1.32	1.17	36	57	8e-06	2.42	1.41	3.43	5	57	0.287	0.83	-1.03	1.86	5	57	0.759	-0.24	-1.41	0.71	6	57	0.441	0.3	-1.18	1.33	9	57	0.266	0.45	-0.68	1.47	10	57	0.0306	1.62	0	2.75	8	57	0.385	0.23	-0.93
BRCA2	Pan, BRCA, OV	Pan, BRCA, OV	4	40	0.437	0.29	-0.88	1.03	24	40	0.000164	1.62	0.81	2.42	1	40	0.918	-0.41	-1.86	0.41	6	40	0.309	0.47	-0.71	1.18	4	40	0.447	0.3	-0.89	1.03	4	40	0.682	0	-1.13	0.68	4	40	0.409	0.32	-0.97	1.29	4	40	0.639	0	-1.05
MYH1	Pan	Pan, BRCA, LUSC	7	94	0.775	-0.59	-2.2	1.03	21	94	0.455	0.13	-1.01	1.14	4	94	0.847	-0.83	-2.68	0.83	12	94	0.422	0.24	-1.3	1.53	11	94	0.227	0.89	-0.89	2.21	7	94	0.926	-0.9	-2.26	0.45	5	94	0.88	-0.65	-2.59	0.65	18	94	0.0416	1.4	-0.12
KCNG4	Pan	Pan	1	9	0.471	0.29	-0.29	0.29	2	9	0.464	0.13	-0.27	0.27	0	9	1	0	-0.83	0	0	9	1	0	-0.47	0	1	9	0.419	0.3	-0.3	0.3	0	9	1	-0.23	-0.57	0	0	9	1	0	-0.65	0	0	9	1	0	-0.47
MNT	Pan	Pan	0	2	1	0	-0.27	0	0	2	1	0	-0.12	0	0	2	1	0	-0.35	0	0	2	1	0	-0.22	0	0	2	1	0	-0.28	0	0	2	1	0	-0.21	0	0	2	1	0	-0.29	0	0	2	1	0	-0.22
NOP56	Pan	Pan	0	10	1	-0.27	-0.81	0	3	10	0.532	0	-0.36	0.36	0	10	1	-0.35	-0.88	0	1	10	0.761	0	-0.66	0.22	1	10	0.645	0	-0.55	0.28	0	10	1	-0.21	-0.74	0	0	10	1	-0.29	-0.88	0	0	10	1	-0.22	-0.76
NSD1	Pan	Pan, OV	13	48	0.00076	2.34	1.17	3.52	14	48	0.202	0.4	-0.4	1.14	6	48	0.0835	1.24	-0.41	2.48	6	48	0.451	0.24	-0.94	1.06	4	48	0.559	0	-1.18	0.89	10	48	0.0595	0.9	-0.11	1.81	5	48	0.32	0.32	-0.97	1.29	7	48	0.247	0.47	-0.58
TPCN2	Pan	Pan, OV, SKCM, UCEC	4	27	0.239	0.54	-0.54	1.08	12	27	0.0424	0.59	0	1.07	6	27	0.0175	1.41	0.35	2.11	4	27	0.345	0.22	-0.55	0.88	3	27	0.418	0.28	-0.69	0.83	3	27	0.612	0	-0.74	0.64	1	27	0.894	-0.29	-1.17	0.29	1	27	0.956	-0.43	-1.19
ANK2	Pan, OV	Pan, OV	7	57	0.309	0.59	-0.88	1.61	17	57	0.229	0.4	-0.54	1.21	1	57	0.983	-1.24	-2.89	0	5	57	0.817	-0.47	-1.53	0.59	4	57	0.752	-0.3	-1.62	0.89	7	57	0.611	0	-1.24	0.9	3	57	0.88	-0.65	-2.1	0.65	5	57	0.846	-0.47	-1.63
KCNH5	Pan	Pan	1	45	0.972	-0.54	-1.62	0.13	8	45	0.718	-0.12	-0.77	0.48	4	45	0.369	0.35	-1.05	1.41	3	45	0.817	-0.22	-1.21	0.44	1	45	0.956	-0.55	-1.52	0.28	3	45	0.836	-0.21	-1.16	0.42	2	45	0.837	-0.29	-1.47	0.59	6	45	0.292	0.43	-0.54
NIPAL3	Pan	Pan, LUSC	2	19	0.492	0.29	-0.59	0.59	7	19	0.136	0.4	-0.2	0.81	3	19	0.15	0.83	-0.41	1.24	4	19	0.163	0.47	-0.24	0.94	1	19	0.756	0	-0.89	0.3	2	19	0.65	0	-0.68	0.45	0	19	1	-0.32	-1.29	0	2	19	0.582	0	-0.7
PRPF8	Pan	Pan	3	10	0.103	0.54	-0.13	0.81	5	10	0.128	0.24	-0.12	0.59	1	10	0.489	0.35	-0.53	0.35	3	10	0.188	0.44	-0.22	0.66	1	10	0.62	0	-0.55	0.28	0	10	1	-0.21	-0.74	0	1	10	0.631	0	-0.59	0.29	2	10	0.438	0.22	-0.43
[truncated: 55 more columns]
