# Supplementary material for: Systematic discovery of germline cancer predisposition genes through the identification of somatic second hits
Source: Nat Commun. 2018 Jul 4;9:2601. doi: 10.1038/s41467-018-04900-7 (PMC6031629; doi:10.1038/s41467-018-04900-7)
Supplement: Supplementary file 9 — Supplementary Data 7 [file 41467_2018_4900_MOESM9_ESM.xlsx]

## Sheet: Sheet1
Supplementary Data 7. Cancer type-specificity tests (enrichment of RDGVs in one cancer type versus in all the other samples) for the ALFRED genes.
nPos = Number of samples with RDGVs in cancer type of interest, nNeg = Number of samples with RDGVs in all the other cancer samples, Pvalue= Significance by cancer type of interest versus cancer samples of all other cancer types, Excess = excess of RDGVs in cancer type of interest compared to all the other cancer samples.
Gene	Significantly enriched cancer type by ALFRED (FDR 20%)	Detected cancer type by ALFRED (P < 0.05)	BLCA_nPos	BLCA_nNeg	BLCA_P	BLCA_Excess	BLCA_Lower_95CI	BLCA_Upper_95CI	BRCA_nPos	BRCA_nNeg	BRCA_P	BRCA_Excess	BRCA_Lower_95CI	BRCA_Upper_95CI	CESC_nPos	CESC_nNeg	CESC_P	CESC_Excess	CESC_Lower_95CI	CESC_Upper_95CI	COADREAD_nPos	COADREAD_nNeg	COADREAD_P	COADREAD_Excess	COADREAD_Lower_95CI	COADREAD_Upper_95CI	GBM_nPos	GBM_nNeg	GBM_P	GBM_Excess	GBM_Lower_95CI	GBM_Upper_95CI	HNSC_nPos	HNSC_nNeg	HNSC_P	HNSC_Excess	HNSC_Lower_95CI	HNSC_Upper_95CI	KIRC_nPos	KIRC_nNeg	KIRC_P	KIRC_Excess	KIRC_Lower_95CI	KIRC_Upper_95CI	LGG_nPos	LGG_nNeg	LGG_P	LGG_Excess	LGG_Lower_95CI
ATM	Pan, BRCA	Pan, BRCA, COADREAD, LUAD, PRAD	3	111	0.876	-0.56	-1.82	0.56	21	93	0.00158	1.34	0.49	1.95	4	110	0.373	0.4	-1.2	1.6	8	106	0.215	0.44	-0.56	1.33	6	108	0.248	0.56	-0.7	1.41	5	109	0.732	-0.21	-1.28	0.64	1	113	0.983	-0.93	-2.17	0	4	110	0.857	-0.44	-1.54
BRCA1	Pan, BRCA, OV	Pan, BRCA, OV, PRAD	5	189	0.907	-0.84	-2.38	0.56	36	158	8.4e-05	2.07	1.1	3.04	5	189	0.637	0	-1.99	1.4	5	189	0.971	-1.11	-2.44	0.11	6	188	0.827	-0.56	-2.25	0.84	9	185	0.721	-0.21	-1.7	0.85	10	184	0.166	0.93	-0.77	2.32	8	186	0.826	-0.44	-1.98
BRCA2	Pan, BRCA, OV	Pan, BRCA, OV	4	128	0.787	-0.28	-1.68	0.7	24	108	0.0019	1.34	0.49	2.13	1	131	0.977	-1.2	-2.79	0.2	6	126	0.672	-0.22	-1.33	0.89	4	128	0.823	-0.28	-1.83	0.7	4	128	0.935	-0.64	-1.81	0.32	4	128	0.716	-0.31	-1.7	0.93	4	128	0.931	-0.66	-1.87
MYH1	Pan	Pan, BRCA, LUSC	7	191	0.703	-0.28	-1.96	1.12	21	177	0.419	0.12	-0.91	1.1	4	194	0.799	-0.4	-2.59	1	12	186	0.333	0.44	-1	1.67	11	187	0.213	0.84	-0.84	2.11	7	191	0.915	-0.85	-2.23	0.43	5	193	0.862	-0.62	-2.48	0.77	18	180	0.0138	1.76	0.33
KCNG4	Pan	Pan	1	16	0.534	0	-0.56	0.28	2	15	0.487	0.12	-0.24	0.24	0	17	1	0	-0.8	0	0	17	1	-0.22	-0.67	0	1	16	0.46	0.28	-0.42	0.28	0	17	1	-0.21	-0.64	0	0	17	1	0	-0.62	0	0	17	1	-0.22	-0.66
MNT	Pan	Pan	0	0	1	0	0	0	0	0	1	0	0	0	0	0	1	0	0	0	0	0	1	0	0	0	0	0	1	0	0	0	0	0	1	0	0	0	0	0	1	0	0	0	0	0	1	0	0
NOP56	Pan	Pan	0	24	1	-0.26	-0.78	0	3	21	0.391	0.11	-0.22	0.33	0	24	1	0	-0.85	0	1	23	0.723	0	-0.62	0.21	1	23	0.604	0	-0.53	0.27	0	24	1	-0.2	-0.8	0	0	24	1	-0.28	-0.85	0	0	24	1	-0.21	-0.82
NSD1	Pan	Pan, OV	13	166	0.0296	1.68	0.14	2.93	14	165	0.872	-0.49	-1.46	0.43	6	173	0.356	0.4	-1.4	1.99	6	173	0.915	-0.67	-2.11	0.44	4	175	0.939	-0.84	-2.53	0.42	10	169	0.508	0	-1.28	1.28	5	174	0.793	-0.31	-2.17	0.93	7	172	0.836	-0.44	-1.87
TPCN2	Pan	Pan, OV, SKCM, UCEC	4	87	0.505	0	-1.03	0.9	12	79	0.216	0.33	-0.38	0.87	6	85	0.0538	1.02	0	2.04	4	87	0.67	0	-1.04	0.62	3	88	0.66	0	-1.06	0.8	3	88	0.859	-0.4	-1.2	0.4	1	90	0.964	-0.56	-1.69	0.28	1	90	0.992	-0.82	-1.64
ANK2	Pan, OV	Pan, OV	7	131	0.335	0.56	-0.98	1.54	17	121	0.199	0.49	-0.43	1.22	1	137	0.98	-1.2	-2.79	0.2	5	133	0.853	-0.44	-1.67	0.56	4	134	0.842	-0.56	-1.97	0.56	7	131	0.617	0	-1.28	0.85	3	135	0.882	-0.62	-2.01	0.62	5	133	0.854	-0.44	-1.65
KCNH5	Pan	Pan	1	82	0.966	-0.52	-1.55	0.26	8	75	0.61	0	-0.65	0.49	4	79	0.292	0.34	-0.68	1.36	3	80	0.784	-0.21	-1.14	0.42	1	82	0.961	-0.53	-1.59	0.27	3	80	0.825	-0.2	-1.2	0.4	2	81	0.807	-0.28	-1.27	0.56	6	77	0.252	0.41	-0.51
NIPAL3	Pan	Pan, LUSC	2	57	0.703	0	-1.12	0.56	7	52	0.417	0.12	-0.49	0.61	3	56	0.245	0.4	-0.6	1.2	4	55	0.372	0.22	-0.67	0.89	1	58	0.901	-0.28	-1.27	0.28	2	57	0.824	-0.21	-1.06	0.43	0	59	1	-0.62	-1.55	0	2	57	0.784	-0.22	-0.99
PRPF8	Pan	Pan	3	33	0.162	0.52	-0.26	0.78	5	31	0.327	0.11	-0.33	0.43	1	35	0.628	0	-0.68	0.34	3	33	0.304	0.21	-0.42	0.62	1	35	0.765	0	-0.8	0.27	0	36	1	-0.4	-1	0	1	35	0.765	0	-0.85	0.28	2	34	0.577	0	-0.62
[truncated: 55 more columns]
