# Supplementary material for: Systematic discovery of germline cancer predisposition genes through the identification of somatic second hits
Source: Nat Commun. 2018 Jul 4;9:2601. doi: 10.1038/s41467-018-04900-7 (PMC6031629; doi:10.1038/s41467-018-04900-7)
Supplement: Supplementary file 10 — Supplementary Data 8 [file 41467_2018_4900_MOESM10_ESM.xlsx]

## Sheet: Sheet1
Supplementary Data 8. Cancer type-specificity tests only using samples with AI (enrichment of RDGVs in one cancer type versus in all the other samples, only for AI samples) for the ALFRED genes.
AI = samples with AI in cancer type of interest, nonAI = samples with AI in other cancer samples, nPos = Number of samples with RDGVs in cancer type of interest, only for AI samples. nNeg = Number of samples with RDGVs in other cancer samples, only for AI samples. Pvalue= Significance by cancer type of interest versus all the other cancer types, only for AI samples. Excess = excess of RDGVs in ca…
Gene	Significantly enriched cancer type by ALFRED (FDR 20%)	Detected cancer type by ALFRED (P < 0.05)	BLCA_AI	nonBLCA_AI	BLCA_nPos	BLCA_nNeg	BLCA_P	BLCA_Excess	BLCA_Lower_95CI	BLCA_Upper_95CI	BRCA_AI	nonBRCA_AI	BRCA_nPos	BRCA_nNeg	BRCA_P	BRCA_Excess	BRCA_Lower_95CI	BRCA_Upper_95CI	CESC_AI	nonCESC_AI	CESC_nPos	CESC_nNeg	CESC_P	CESC_Excess	CESC_Lower_95CI	CESC_Upper_95CI	COADREAD_AI	nonCOADREAD_AI	COADREAD_nPos	COADREAD_nNeg	COADREAD_P	COADREAD_Excess	COADREAD_Lower_95CI	COADREAD_Upper_95CI	GBM_AI	nonGBM_AI	GBM_nPos	GBM_nNeg	GBM_P	GBM_Excess	GBM_Lower_95CI	GBM_Upper_95CI	HNSC_AI	nonHNSC_AI	HNSC_nPos	HNSC_nNeg	HNSC_P	HNSC_Excess	HNSC_Lower_95CI
ATM	Pan, BRCA	Pan, BRCA, COADREAD, LUAD, PRAD	66	1187	1	38	0.91	-1.6	-7.2	1.6	243	1010	12	27	0.0361	2.55	0	4.59	57	1196	2	37	0.579	0	-5.51	3.68	42	1211	3	36	0.169	4.93	-2.46	7.39	28	1225	1	38	0.603	0	-7.31	3.65	85	1168	0	39	1	-2.52	-6.94
BRCA1	Pan, BRCA, OV	Pan, BRCA, OV, PRAD	46	1193	1	83	0.958	-4.52	-12.42	2.26	213	1026	18	66	0.175	2.27	-1.7	5.39	31	1208	1	83	0.926	-3.31	-14.89	3.31	63	1176	2	82	0.921	-3.34	-10.03	1.67	38	1201	2	82	0.722	0	-10.86	5.43	42	1197	2	82	0.788	-2.46	-9.86
BRCA2	Pan, BRCA, OV	Pan, BRCA, OV	60	1879	1	49	0.786	0	-5.16	1.72	261	1678	16	34	0.000198	4.43	2.21	6.2	54	1885	0	50	1	-1.9	-7.62	0	99	1840	2	48	0.732	0	-4.26	2.13	87	1852	1	49	0.901	-1.2	-5.42	1.2	129	1810	1	49	0.971	-1.66	-4.98
MYH1	Pan	Pan, BRCA, LUSC	67	1065	2	46	0.814	-1.59	-7.14	3.17	169	963	8	40	0.388	0.7	-2.78	3.48	17	1115	0	48	1	0	-14.93	0	88	1044	4	44	0.574	0	-4.93	3.7	32	1100	2	46	0.43	3.22	-6.43	6.43	62	1070	2	46	0.768	-1.71	-6.83
KCNG4	Pan	Pan	78	1826	2	18	0.151	1.34	-0.67	2.67	329	1575	3	17	0.76	-0.37	-1.47	0.73	40	1864	NA	NA	NA	NA	NA	NA	51	1853	NA	NA	NA	NA	NA	NA	61	1843	1	19	0.509	0	-2.54	1.69	83	1821	0	20	1	-1.26	-3.78
MNT	Pan	Pan	88	1480	1	8	0.42	1.2	-1.2	1.2	182	1386	3	6	0.059	1.24	0	1.86	35	1533	NA	NA	NA	NA	NA	NA	103	1465	1	8	0.432	1.04	-1.04	1.04	51	1517	1	8	0.285	2.03	-2.03	2.03	96	1472	1	8	0.469	1.11	-1.11
NOP56	Pan	Pan	54	1516	NA	NA	NA	NA	NA	NA	173	1397	2	10	0.305	0.65	-0.65	1.3	55	1515	NA	NA	NA	NA	NA	NA	151	1419	1	11	0.721	0	-1.83	0.73	79	1491	0	12	1	0	-3.33	0	69	1501	NA	NA	NA	NA	NA
NSD1	Pan	Pan, OV	77	1041	3	37	0.56	0	-4.18	4.18	115	1003	3	37	0.858	-0.97	-5.33	1.94	43	1075	1	39	0.808	0	-7.26	2.42	86	1032	2	38	0.872	-1.26	-6.3	1.89	15	1103	0	40	1	0	-13.51	0	94	1024	3	37	0.705	0	-5.23
TPCN2	Pan	Pan, OV, SKCM, UCEC	68	1270	2	32	0.489	1.55	-3.1	3.1	174	1164	5	29	0.497	0.66	-2.31	2.64	44	1294	1	33	0.718	0	-7.05	2.35	51	1287	1	33	0.753	0	-6.12	2.04	54	1284	0	34	1	-1.93	-7.72	0	100	1238	2	32	0.74	0	-4.32
ANK2	Pan, OV	Pan, OV	43	1026	1	29	0.705	0	-6.06	2.42	142	927	2	28	0.94	-1.62	-4.87	0.81	41	1028	0	30	1	-2.54	-7.61	0	61	1008	1	29	0.842	-1.74	-6.08	1.74	35	1034	1	29	0.598	0	-5.91	2.95	52	1017	2	28	0.405	2.02	-4.04
KCNH5	Pan	Pan	49	983	1	17	0.639	0	-4.29	2.14	138	894	3	15	0.301	0.84	-1.67	2.51	18	1014	2	16	0.0406	11.31	0	11.31	71	961	0	18	1	-1.51	-5.29	0	53	979	0	18	1	-1.99	-5.97	0	48	984	0	18	1	-2.18	-6.55
NIPAL3	Pan	Pan, LUSC	37	993	1	17	0.485	2.8	-4.21	2.8	122	908	3	15	0.441	0.93	-2.32	2.79	24	1006	0	18	1	0	-8.53	0	58	972	3	15	0.0783	3.65	0	5.48	32	998	0	18	1	0	-8.06	0	43	987	0	18	1	-2.43	-7.28
PRPF8	Pan	Pan	137	2370	0	20	1	-0.77	-2.32	0	345	2162	4	16	0.244	0.67	-0.67	1.34	45	2462	1	19	0.281	2.26	-2.26	2.26	186	2321	2	18	0.47	0.58	-1.16	1.16	83	2424	0	20	1	0	-3.12	0	149	2358	NA	NA	NA	NA	NA
[truncated: 89 more columns]
