# Supplementary material for: Systematic discovery of germline cancer predisposition genes through the identification of somatic second hits
Source: Nat Commun. 2018 Jul 4;9:2601. doi: 10.1038/s41467-018-04900-7 (PMC6031629; doi:10.1038/s41467-018-04900-7)
Supplement: Supplementary file 11 — Supplementary Data 9 [file 41467_2018_4900_MOESM11_ESM.xlsx]

## Sheet: Sheet1
Supplementary Data 9. Summary of the ALFRED analyses and three RDGV frequency analyses for the ALFRED genes.
Gene	Gene annotation	Significantly enriched cancer type by ALFRED (FDR20%)	Detected cancer type by ALFRED (P < 0.05)	Number of dtected cancer types by ALFRED	Matched cancer type by case patients vs. control samples	Matched cancer type by cancer type of interest versus all the other cancer samples analysis	Matched cancer type by cancer type of interest versus all the other cancer samples for AI samples only analysis	Major associated cancer type (Futreal et al, 2004)	Major associated cancer type (Rahman, 2014)
ATM	CPG	Pan, BRCA	Pan, BRCA, COADREAD, LUAD, PRAD	5	4 (BRCA, COADREAD, PRAD, LUAD)	1 (BRCA)	2 (BRCA, PRAD)	leukaemia, lymphoma, medulloblastoma, glioma	Biallelic mutations: lymphoid, hematological malignancy (leukemia, lymphoma), Monoallelic mutations: breast
BRCA1	CPG	Pan, BRCA, OV	Pan, BRCA, OV, PRAD	4	2 (BRCA, OV)	2 (BRCA, OV)	1 (OV)	breast, ovarian	breast, ovarian
BRCA2	CPG	Pan, BRCA, OV	Pan, BRCA, OV	3	2 (BRCA, OV)	2 (BRCA, OV)	2 (BRCA, OV)	breast, ovarian, pancreatic, leukaemia	Biallelic mutations: myeloid, hematological malignancy, Monoallelic mutations: breast, ovarian, prostate, pancreas
MYH1	Somatic driver	Pan	Pan, BRCA, LUSC	3	0 ()	0 ()	0 ()
KCNG4		Pan	Pan	1	0 ()	0 ()	0 ()
MNT		Pan	Pan	1	0 ()	0 ()	0 ()
NOP56	Somatic driver	Pan	Pan	1	0 ()	0 ()	0 ()
NSD1	Somatic driver	Pan	Pan, OV	2	1 (OV)	1 (OV)	1 (OV)
TPCN2		Pan	Pan, OV, SKCM, UCEC	4	1 (UCEC)	0 ()	0 ()
ANK2		Pan, OV	Pan, OV	2	0 ()	0 ()	1 (OV)
KCNH5		Pan	Pan	1	0 ()	0 ()	0 ()
NIPAL3		Pan	Pan, LUSC	2	0 ()	0 ()	1 (LUSC)
PRPF8	Somatic driver	Pan	Pan	1	0 ()	0 ()	0 ()
