# Supplementary material for: Systematic discovery of germline cancer predisposition genes through the identification of somatic second hits
Source: Nat Commun. 2018 Jul 4;9:2601. doi: 10.1038/s41467-018-04900-7 (PMC6031629; doi:10.1038/s41467-018-04900-7)
Supplement: Supplementary file 12 — Supplementary Data 10 [file 41467_2018_4900_MOESM12_ESM.xlsx]

## Sheet: Sheet1
Supplementary Data 10. ALFRED analysis in 17 individual cancer types when FDR correction was performed across 17 cancer types considered together.
Cancer type	Gene	Num.of samples with AI	Num.of samples without AI	Num.of samples with RDGVs	Num.of samples without RDGVs	Num.of samples with RDGVs in AI	Num.of samples with RDGVs in noAI	Excess of RDGVs in LOH samples compared with no LOH samples (%)	Lower_95% CI	Upper_95% CI	Random_P	Samples with AI in RDGV samples (%)	Samples with AI in noRDGV samples (%)	Relative risk (RR)	Num.of samples with at least 10% increased VAF of RDGVs in AI samples	Num.of samples with at least 10% increased VAF of RDGVs in noAI samples	Binomial_P	ALFRED_P	FDR
OV	BRCA1	177	129	34	273	32	1	16.08	9.38	23.45	0	94.12	53.11	23.32	30	0	2.06e-15	2.06e-15	5.047e-13
BRCA	BRCA2	261	643	28	877	16	11	4.31	1.89	6.73	0.000686	57.14	27.94	3.58	12	3	0.000493	0.000686	0.0762767
OV	BRCA2	186	175	24	337	20	4	7.76	3.33	13.31	0.000934	83.33	49.26	4.7	19	2	0.000111	0.000934	0.0762767
BRCA	BRCA1	213	558	37	734	18	19	5.19	1.95	8.43	0.00275	48.65	26.57	2.48	15	7	0.000281	0.00275	0.168437
BRCA	ATM	243	660	23	880	12	11	3.38	1.13	5.63	0.00346	52.17	26.25	2.96	10	3	0.000507	0.00346	0.16954
OV	ANK2	103	258	9	352	7	2	5.43	2.04	9.51	0.00334	77.78	27.27	8.77	5	0	0.00461	0.00461	0.188242
OV	NSD1	88	273	17	344	8	9	6.01	1.5	10.52	0.0149	47.06	23.26	2.76	5	1	0.00563	0.0149	0.493063
BRCA	THBS4	106	602	15	694	6	8	4.44	1.11	6.66	0.014	40	14.41	4.26	6	3	0.0161	0.0161	0.493063
BRCA	MYH8	285	619	19	886	9	9	2.05	0	3.59	0.0453	47.37	31.15	2.17	5	1	0.00987	0.0453	1
LUSC	SI	117	353	14	456	7	7	3.41	0	6.83	0.0439	50	24.12	3.02	4	1	0.0455	0.0455	1
UCEC	COL17A1	154	292	12	435	7	4	2.98	0	5.95	0.0556	58.33	33.79	3.32	4	0	0.00502	0.0556	1
BRCA	MYO9A	128	776	27	878	7	19	3.64	0	5.92	0.0441	25.93	13.78	2.23	3	2	0.0673	0.0673	1
HNSC	UNC13B	62	199	9	252	5	4	6.35	0	10.58	0.0708	55.56	22.62	4.01	4	0	0.00127	0.0708	1
SKCM	COL27A1	217	238	9	446	7	2	2.64	0	4.85	0.0793	77.78	47.09	3.84	5	0	0.00461	0.0793	1
HNSC	TNFRSF13B	96	374	10	460	4	6	2.62	-0.65	5.24	0.0901	40	20	2.6	3	1	0.0695	0.0901	1
KIRC	SCN10A	184	146	13	318	10	2	3.69	0	7.98	0.0429	76.92	54.72	3.97	4	0	0.0956	0.0956	1
BRCA	MYH3	315	564	18	861	10	8	1.48	-0.49	3.46	0.0977	55.56	35.42	2.24	7	1	0.000629	0.0977	1
BRCA	SACS	237	667	24	881	10	13	1.72	-0.57	4	0.104	41.67	25.77	2.16	4	1	0.0234	0.104	1
STAD	ACACB	80	291	9	362	4	5	3.19	-0.8	6.37	0.108	44.44	20.99	2.91	3	1	0.104	0.108	1
COADREAD	DST	54	396	14	436	4	10	4.21	-2.1	8.42	0.111	28.57	11.47	2.93	4	3	0.0382	0.111	1
BRCA	COL6A2	139	742	11	870	5	6	2.56	0.85	4.27	0.014	45.45	15.4	4.45	3	1	0.117	0.117	1
SKCM	LRP2	117	338	23	432	9	14	3.45	-1.73	7.48	0.126	39.13	25	1.86	4	2	0.0697	0.126	1
STAD	FLNB	84	272	13	343	5	8	3.12	-1.56	7.79	0.132	38.46	23.03	2.02	4	0	0.00013	0.132	1
LUSC	SCN10A	252	218	21	449	14	7	2.57	-1.28	5.99	0.14	66.67	53.01	1.73	7	1	0.0127	0.14	1
LIHC	HMCN1	91	173	13	251	6	7	3.35	-1.68	8.38	0.143	46.15	33.86	1.63	3	1	0.127	0.143	1
BRCA	CATSPER1	164	740	16	888	5	11	1.49	-0.74	3.72	0.144	31.25	17.91	2.05	3	2	0.109	0.144	1
BRCA	FBN2	207	690	22	875	8	14	1.88	-0.94	3.77	0.147	36.36	22.74	1.9	5	2	0.00895	0.147	1
BRCA	COL7A1	179	717	27	869	8	19	2.09	-1.05	4.19	0.159	29.63	19.68	1.69	5	3	0.0111	0.159	1
LUAD	COL7A1	86	433	17	502	6	11	4.18	0	8.36	0.0537	35.29	15.94	2.75	5	5	0.164	0.164	1
OV	ABCA10	187	174	11	351	7	3	2.22	-1.11	5.55	0.167	63.64	51.28	2.17	4	0	0.0112	0.167	1
GBM	LRP2	68	297	23	342	6	17	3.61	-2.71	9.04	0.17	26.09	18.13	1.54	4	3	0.0303	0.17	1
LUAD	GLDC	112	390	14	488	5	9	2.3	-1.15	5.75	0.172	35.71	21.93	1.93	4	3	0.117	0.172	1
LUSC	HK3	130	340	18	452	11	7	6.38	2.66	10.1	0.00192	61.11	26.33	4.11	4	1	0.173	0.173	1
BRCA	AGL	175	693	11	857	4	7	1.43	-0.72	2.86	0.176	36.36	19.95	2.26	4	2	0.0358	0.176	1
BRCA	MYH6	241	657	14	884	7	7	1.7	0	3.4	0.0596	50	26.47	2.73	3	1	0.176	0.176	1
LUSC	ACACB	116	354	10	460	4	6	2.29	-1.14	4.58	0.179	40	24.35	2.03	3	1	0.0695	0.179	1
LGG	MYH3	72	374	14	432	4	10	3.31	-1.66	6.63	0.18	28.57	15.74	2.08	3	1	0.0205	0.18	1
COADREAD	MYH1	88	354	12	430	4	8	2.84	-1.42	5.68	0.184	33.33	19.53	2.01	3	1	0.0355	0.184	1
LUSC	MYO9A	59	411	11	459	3	8	3.88	-1.94	5.81	0.186	27.27	12.2	2.61	3	2	0.0679	0.186	1
BRCA	TSC2	126	504	23	607	7	16	1.98	-1.98	5.46	0.187	30.43	19.6	1.75	4	3	0.0618	0.187	1
UCEC	ANK2	53	393	14	432	4	10	4.28	0	8.56	0.0632	28.57	11.34	2.97	3	3	0.188	0.188	1
LUAD	SCN10A	149	375	22	503	8	13	1.88	-1.88	5.63	0.191	36.36	28.03	1.55	4	2	0.06	0.191	1
BRCA	COL11A1	203	701	14	890	5	9	1.27	-0.95	2.86	0.199	35.71	22.25	1.92	3	1	0.0473	0.199	1
COADREAD	LRP1B	120	330	16	435	6	9	2.27	-1.7	5.68	0.209	37.5	26.21	1.83	3	1	0.0738	0.209	1
BRCA	TPP1	281	623	10	894	5	5	1.03	-0.52	2.07	0.212	50	30.87	2.22	4	2	0.203	0.212	1
GBM	ABCC2	201	164	11	354	8	3	2.21	-1.11	5.54	0.215	72.73	54.52	2.18	6	0	0.000228	0.215	1
BRCA	MYH1	169	721	19	871	8	11	3.65	0.73	5.48	0.00849	42.11	18.48	3.1	5	4	0.217	0.217	1
LUSC	MYH4	168	180	14	334	9	5	2.3	-1.73	6.33	0.219	64.29	47.6	1.93	6	1	0.0197	0.219	1
BRCA	TPCN2	174	730	12	892	5	7	2.14	0	3.56	0.0389	41.67	18.95	3	4	3	0.235	0.235	1
BLCA	CACNA1S	103	258	14	347	7	7	4.08	0	8.15	0.0544	50	27.67	2.5	5	3	0.237	0.237	1
LUAD	CFTR	56	375	26	405	7	19	6.16	0	12.31	0.0566	26.92	12.1	2.47	4	6	0.242	0.242	1
LUSC	ABCA6	116	354	11	459	6	5	3.43	0	6.87	0.0383	54.55	23.97	3.66	3	1	0.244	0.244	1
UCEC	SACS	46	400	16	431	6	9	9.7	4.85	14.54	0.00323	37.5	9.28	5.8	3	2	0.244	0.244	1
BRCA	HMCN1	222	678	17	883	6	11	1.2	-1.2	2.99	0.245	35.29	24.46	1.67	4	2	0.0383	0.245	1
BRCA	DNAH3	205	699	12	892	4	8	0.63	-0.95	2.52	0.251	33.33	22.53	1.7	3	1	0.0355	0.251	1
SKCM	CFTR	55	288	20	323	5	15	4.33	-4.33	8.66	0.253	25	15.48	1.75	4	3	0.0234	0.253	1
COADREAD	CACNA1S	79	371	17	436	5	9	4.61	0	7.68	0.0534	29.41	16.97	2.61	4	4	0.255	0.255	1
BRCA	TDRD3	95	374	9	460	5	4	5.28	1.32	6.6	0.0101	55.56	19.57	4.92	3	1	0.256	0.256	1
BRCA	KCNH4	154	451	9	596	5	4	1.74	0	4.36	0.083	55.56	25	3.66	3	1	0.256	0.256	1
BRCA	FANCM	99	394	9	484	5	4	3.79	1.26	6.32	0.016	55.56	19.42	4.97	3	1	0.256	0.256	1
LUSC	CFTR	58	319	18	359	4	14	2.04	-4.08	8.15	0.257	22.22	15.04	1.57	3	3	0.0867	0.257	1
HNSC	HMCN1	69	402	13	459	3	9	1.7	-2.55	5.09	0.262	23.08	14.38	1.94	3	2	0.0508	0.262	1
LIHC	CACNA1S	78	186	12	252	5	7	3.64	-2.73	7.28	0.223	41.67	28.97	1.7	3	2	0.279	0.279	1
LUAD	ATP1A4	131	393	12	512	5	7	2.04	-1.02	5.09	0.119	41.67	24.61	2.14	3	2	0.279	0.279	1
HNSC	CACNA1S	87	384	20	451	5	15	1.41	-2.82	5.64	0.291	25	18.18	1.47	2	2	0.238	0.291	1
BRCA	THBS3	207	693	12	888	4	8	0.63	-1.25	2.51	0.283	33.33	22.86	1.67	3	3	0.298	0.298	1
BRCA	MYH4	265	407	15	657	8	7	1.25	-1.25	3.12	0.252	53.33	39.12	1.76	4	2	0.299	0.299	1
LUSC	EP400	45	295	11	329	3	8	5.12	-2.56	7.68	0.167	27.27	12.77	2.46	2	2	0.309	0.309	1
OV	SCN11A	87	274	9	352	4	5	3.03	-1.51	6.06	0.14	44.44	23.58	2.52	4	3	0.309	0.309	1
COADREAD	RYR1	107	341	24	427	6	15	1.23	-2.46	6.14	0.298	25	23.65	1.27	3	4	0.311	0.311	1
BLCA	FBN2	99	262	12	349	4	8	1.39	-2.78	5.57	0.315	33.33	27.22	1.32	4	0	4.55e-05	0.315	1
OV	LRP1B	157	204	11	350	6	5	1.13	-2.25	4.51	0.297	54.55	43.14	1.56	4	2	0.323	0.323	1
LUSC	RYR1	151	318	18	451	8	10	1.95	-1.95	5.37	0.243	44.44	31.71	1.68	3	2	0.336	0.336	1
LUSC	SACS	194	276	9	461	5	4	0.88	-1.76	3.51	0.339	55.56	41	1.78	4	1	0.0705	0.339	1
LUAD	TPCN2	90	434	9	515	4	5	2.68	-0.67	5.37	0.0996	44.44	16.7	3.86	3	2	0.347	0.347	1
LUSC	CPS1	132	338	9	461	4	5	2.11	-1.05	4.21	0.193	44.44	27.77	2.05	3	2	0.347	0.347	1
PRAD	LRP1B	81	376	18	439	4	14	1.5	-3	6	0.348	22.22	17.54	1.33	2	2	0.196	0.348	1
BRCA	ABCC11	298	459	16	742	7	8	0.55	-1.38	2.77	0.352	43.75	39.22	1.35	4	1	0.0307	0.352	1
BRCA	SCN10A	215	689	37	868	10	26	0.61	-2.44	3.66	0.356	27.03	23.62	1.23	7	6	0.00605	0.356	1
BRCA	DST	116	788	23	881	7	16	3.96	0.99	6.92	0.0162	30.43	12.37	2.97	3	4	0.358	0.358	1
SKCM	ABCC12	56	399	10	445	2	8	2.04	-3.05	4.07	0.365	20	12.13	1.78	2	3	0.336	0.365	1
LGG	LRP1B	44	420	17	447	4	13	7.53	0	10.04	0.056	23.53	8.95	2.94	2	3	0.367	0.367	1
BLCA	SI	47	309	10	346	3	7	4.9	-2.45	7.35	0.159	30	12.72	2.82	2	2	0.37	0.37	1
BRCA	PHF12	113	414	10	517	3	7	1.13	-1.69	3.38	0.289	30	21.28	1.57	2	2	0.37	0.37	1
LUAD	ATP2A1	78	446	10	514	3	7	3.01	-1.51	4.52	0.189	30	14.59	2.45	2	2	0.37	0.37	1
OV	ABCA9	173	188	10	352	5	4	1.11	-2.22	4.44	0.377	50	47.73	1.36	5	0	5.5e-05	0.377	1
BRCA	OTOF	135	768	14	890	3	10	0.87	-1.74	2.61	0.336	21.43	14.83	1.71	2	3	0.38	0.38	1
BRCA	CHST4	112	400	10	502	3	7	1.14	-2.29	3.43	0.384	30	21.71	1.53	3	1	0.0227	0.384	1
LUSC	COL7A1	192	275	10	457	5	5	0.88	-1.77	3.54	0.386	50	40.92	1.43	3	1	0.169	0.386	1
HNSC	CP	95	376	11	460	3	8	1.32	-2.64	3.96	0.398	27.27	20	1.48	2	2	0.309	0.398	1
BRCA	ABCC12	249	655	18	886	6	12	0.55	-1.66	2.22	0.403	33.33	27.43	1.32	3	2	0.135	0.403	1
GBM	CFTR	62	234	21	275	6	15	2.04	-6.12	8.16	0.408	28.57	20.36	1.51	6	1	4.37e-06	0.408	1
LUAD	FBN3	277	247	12	512	7	5	0.77	-1.91	3.06	0.412	58.33	52.73	1.25	7	0	2.07e-07	0.412	1
GBM	SACS	90	275	11	354	3	8	1.47	-2.95	4.42	0.419	27.27	24.58	1.15	3	3	0.167	0.419	1
BRCA	ABCA6	232	672	14	890	4	10	0.58	-1.45	2.03	0.435	28.57	25.62	1.16	2	2	0.319	0.435	1
BRCA	VPS4B	86	621	10	697	2	8	1.32	-2.65	2.65	0.436	20	12.05	1.81	2	2	0.189	0.436	1
BRCA	ATP13A5	181	723	12	892	3	9	0.69	-1.38	2.07	0.418	25	19.96	1.33	2	3	0.437	0.437	1
COADREAD	FBN2	159	289	14	437	7	4	2.92	0	5.85	0.0538	50	34.78	3.18	3	1	0.448	0.448	1
LUSC	H6PD	103	304	9	398	3	6	1.3	-2.6	3.9	0.401	33.33	25.13	1.48	2	2	0.45	0.45	1
SKCM	SCN10A	77	378	15	440	3	12	1.56	-3.91	4.69	0.451	20	16.82	1.23	2	2	0.169	0.451	1
LGG	MYH4	53	285	13	325	3	10	2.24	-4.48	6.71	0.461	23.08	15.38	1.61	3	2	0.039	0.461	1
BLCA	CACNA1D	90	269	10	349	3	7	1.48	-2.97	4.45	0.47	30	24.93	1.28	2	2	0.37	0.47	1
BRCA	DYSF	139	765	16	888	3	13	0.85	-2.13	2.55	0.475	18.75	15.32	1.27	2	3	0.262	0.475	1
HNSC	COL7A1	152	319	12	459	6	6	1.94	-0.97	4.86	0.163	50	31.81	2.1	3	2	0.484	0.484	1
LUSC	FBN3	205	265	12	458	6	6	0.87	-2.16	3.46	0.398	50	43.45	1.29	3	2	0.484	0.484	1
BRCA	LRP2	243	661	39	865	11	28	0.56	-2.81	3.1	0.492	28.21	26.82	1.07	4	7	0.378	0.492	1
LUAD	USH2A	166	358	14	510	5	9	0.88	-2.65	3.53	0.493	35.71	31.57	1.2	3	1	0.0473	0.493	1
BRCA	CACNA1D	260	634	16	878	6	10	1.08	-1.08	2.71	0.257	37.5	28.93	1.46	2	2	0.497	0.497	1
HNSC	SCN10A	197	274	22	449	10	12	0.87	-3.49	4.36	0.499	45.45	41.65	1.16	4	3	0.341	0.499	1
BRCA	MYH10	326	578	13	891	5	8	0.48	-1.44	1.68	0.5	38.46	36.03	1.11	4	3	0.164	0.5	1
COADREAD	SCN10A	84	366	15	436	3	11	0	-3.66	4.39	0.504	20	18.58	1.19	2	2	0.194	0.504	1
UCEC	DNAH3	64	382	12	434	2	10	0	-3.65	3.65	0.505	16.67	14.29	1.19	2	2	0.131	0.505	1
UCEC	MYH3	85	349	11	423	3	8	1.46	-1.46	4.39	0.272	27.27	19.39	1.54	2	3	0.506	0.506	1
OV	ACACB	195	166	11	351	6	4	0	-2.79	3.9	0.507	54.55	53.85	1.28	4	1	0.126	0.507	1
BRCA	ATP8B4	165	739	17	888	3	13	0	-2.22	2.22	0.51	17.65	18.24	1.03	2	2	0.149	0.51	1
LUAD	ABCC8	129	395	11	513	3	8	0	-2.57	3.09	0.518	27.27	24.56	1.15	2	2	0.309	0.518	1
BRCA	CES5A	352	552	9	895	6	3	1.4	-0.23	2.33	0.0851	66.67	38.66	3.14	3	1	0.525	0.525	1
BRCA	FBN3	269	635	21	883	9	12	1.59	-0.53	3.7	0.123	42.86	29.45	1.77	3	3	0.531	0.531	1
BRCA	HKDC1	173	731	12	892	5	7	2.14	0	3.57	0.0516	41.67	18.83	3.02	3	3	0.533	0.533	1
UCEC	MYH4	73	256	15	314	4	11	0	-5.28	5.28	0.539	26.67	21.97	1.28	3	2	0.0645	0.539	1
HNSC	HK3	92	378	13	457	3	10	1.35	-2.7	4.05	0.454	23.08	19.47	1.23	2	4	0.54	0.54	1
CESC	SACS	46	191	11	226	2	9	0	-5.39	5.39	0.554	18.18	19.47	0.92	2	2	0.156	0.554	1
BRCA	TYR	165	632	19	778	6	13	2.29	-0.76	3.82	0.128	31.58	20.44	1.77	3	5	0.564	0.564	1
HNSC	LRP1B	137	334	15	458	4	9	0	-3.09	3.09	0.561	26.67	29.04	1.08	2	3	0.572	0.572	1
BRCA	RYR1	204	700	30	874	10	20	2.53	-0.63	5.06	0.0812	33.33	22.2	1.72	3	5	0.581	0.581	1
STAD	RYR1	119	252	22	349	7	15	0	-4.95	4.95	0.584	31.82	32.09	0.99	3	2	0.116	0.584	1
LUAD	APC	93	414	10	497	4	6	2.63	-0.66	5.27	0.0922	40	17.91	2.97	2	2	0.585	0.585	1
OV	LRP1	103	257	10	350	4	6	2.72	-1.36	5.44	0.233	40	28.29	1.66	2	2	0.585	0.585	1
STAD	WFS1	48	302	10	340	4	6	7.24	1.21	9.66	0.0247	40	12.94	4.19	2	2	0.585	0.585	1
GBM	COL19A1	78	287	10	355	3	7	1.63	-3.26	4.89	0.336	30	21.13	1.58	2	3	0.588	0.588	1
BRCA	COL4A1	372	532	15	890	9	5	1.37	0	3.2	0.0539	60	40.79	2.57	6	3	0.591	0.591	1
BRCA	SRCAP	89	815	19	886	2	16	0	-3.74	2.49	0.594	10.53	9.82	1.14	2	2	0.0585	0.594	1
BRCA	CFTR	91	669	31	730	4	26	1.25	-3.75	4.37	0.439	12.9	11.92	1.13	1	4	0.598	0.598	1
BLCA	TNS1	155	206	9	352	4	5	0	-3.39	3.39	0.602	44.44	42.9	1.06	4	0	0.000225	0.602	1
LUAD	PYGB	104	420	10	514	2	8	0	-3	2.4	0.613	20	19.84	1.01	2	2	0.189	0.613	1
BRCA	MYH2	217	415	9	623	7	2	2.81	0.7	4.21	0.0151	77.78	33.71	6.69	4	1	0.637	0.637	1
LGG	RYR1	182	282	25	439	9	16	0	-4.52	3.62	0.646	36	39.41	0.87	4	2	0.0469	0.646	1
BRCA	HK3	136	757	24	869	6	18	1.73	-1.73	4.34	0.24	25	14.96	1.86	2	5	0.648	0.648	1
OV	SI	100	260	14	346	4	10	0	-4.85	4.15	0.655	28.57	27.75	1.04	4	2	0.0109	0.655	1
BRCA	ABCC8	182	721	18	886	3	14	0	-2.41	1.72	0.667	16.67	20.2	0.85	2	4	0.348	0.667	1
GBM	RYR1	100	264	15	349	4	11	0	-5.52	4.14	0.674	26.67	27.51	0.96	3	4	0.275	0.674	1
LUAD	LRP2	126	398	16	508	3	13	0	-3.66	2.61	0.676	18.75	24.21	0.73	2	5	0.512	0.676	1
LUSC	ITPR3	186	283	12	457	5	7	0	-3.12	2.67	0.684	41.67	39.61	1.09	3	1	0.0841	0.684	1
BRCA	ABCA4	277	627	21	883	6	15	-0.52	-2.6	1.56	0.686	28.57	30.69	0.91	3	2	0.0817	0.686	1
UCEC	APC	43	390	11	422	1	10	0	-5.16	2.58	0.687	9.09	9.95	0.91	1	3	0.535	0.687	1
LUAD	MYH3	156	355	9	502	4	5	0.92	-1.85	2.77	0.417	44.44	30.28	1.82	2	2	0.691	0.691	1
LUSC	COL19A1	107	363	9	461	4	5	2.42	-0.61	4.84	0.118	44.44	22.34	2.71	2	2	0.691	0.691	1
BRCA	WFS1	165	701	11	855	2	9	0	-2.25	1.5	0.695	18.18	19.06	0.94	2	2	0.156	0.695	1
LUAD	ABCA4	123	401	19	505	4	15	0	-4.25	3.19	0.704	21.05	23.56	0.87	4	4	0.0242	0.704	1
BRCA	CORIN	144	759	13	890	2	11	0	-2.48	1.65	0.711	15.38	15.96	0.96	2	2	0.112	0.711	1
BRCA	DISP1	190	714	16	888	3	13	0	-2.67	1.33	0.711	18.75	21.06	0.87	2	2	0.149	0.711	1
LUSC	LRP1	83	387	11	459	4	7	2.93	-1.46	5.85	0.158	36.36	17.21	2.66	2	3	0.725	0.725	1
LUSC	LRP1B	161	309	33	437	10	23	-0.94	-6.14	3.78	0.743	30.3	34.55	0.83	4	7	0.467	0.743	1
HNSC	APC	92	361	18	436	3	14	-1.36	-5.46	2.73	0.748	16.67	20.41	0.84	1	3	0.655	0.748	1
LUAD	KCNH6	86	437	14	509	2	12	0	-4.87	2.78	0.753	14.29	16.5	0.85	1	4	0.72	0.753	1
SKCM	SYNJ2	152	297	9	440	6	3	2.98	0	5.47	0.045	66.67	33.18	3.91	4	2	0.757	0.757	1
LUAD	POSTN	90	368	13	445	2	11	0	-4.84	2.77	0.761	15.38	19.78	0.74	2	2	0.112	0.761	1
BRCA	CRB1	119	785	12	892	1	11	0	-2.9	0.97	0.764	8.33	13.23	0.6	1	3	0.498	0.764	1
UCEC	SCN10A	62	384	22	425	2	19	0	-7.49	3.75	0.764	9.09	14.12	0.65	1	7	0.756	0.764	1
BLCA	DYSF	80	281	13	348	2	11	0	-5.62	3.21	0.766	15.38	22.41	0.64	1	3	0.645	0.766	1
BRCA	ATP1A4	321	583	15	889	6	9	0.48	-1.45	1.93	0.406	40	35.43	1.21	2	3	0.766	0.766	1
BRCA	ITGB4	215	689	16	888	3	13	-0.61	-2.44	1.22	0.775	18.75	23.87	0.74	2	5	0.512	0.775	1
PRAD	LRP2	58	399	22	435	2	20	-1.97	-7.9	3.95	0.783	9.09	12.87	0.69	1	3	0.421	0.783	1
BRCA	ATP12A	213	665	13	865	3	10	0	-1.86	1.86	0.591	23.08	24.28	0.94	1	3	0.784	0.784	1
SKCM	ACACB	107	348	12	443	2	10	-1.22	-4.28	2.44	0.788	16.67	23.7	0.65	1	3	0.683	0.788	1
LGG	DPYD	76	381	10	447	5	5	4.73	1.58	7.89	0.0154	50	15.88	5.01	2	2	0.792	0.792	1
COADREAD	KCNH6	84	364	12	436	2	10	-1.47	-5.13	2.93	0.793	16.67	18.81	0.87	2	3	0.239	0.793	1
HNSC	FBN2	144	327	13	459	3	9	-1	-4	2	0.793	23.08	30.72	0.76	3	2	0.0508	0.793	1
BRCA	LBR	134	759	12	881	2	10	0.88	-1.76	1.76	0.486	16.67	14.98	1.13	1	4	0.794	0.794	1
BRCA	MYO3A	166	678	12	832	2	10	0	-2.25	1.5	0.737	16.67	19.71	0.82	1	4	0.794	0.794	1
CESC	CFTR	25	170	15	180	2	13	0	-13.76	4.59	0.794	13.33	12.78	1.05	1	3	0.578	0.794	1
KIRC	FBN3	47	283	10	320	1	9	0	-6.2	2.48	0.748	10	14.38	0.67	1	5	0.797	0.797	1
BRCA	SI	147	756	23	880	5	18	0.81	-2.03	3.25	0.31	21.74	16.14	1.43	1	4	0.802	0.802	1
SKCM	LRP1B	121	334	20	436	4	15	-1.13	-5.63	2.25	0.805	20	26.83	0.74	1	3	0.709	0.805	1
BRCA	CACNA1S	317	586	26	877	8	18	-0.97	-3.16	1.46	0.812	30.77	35.23	0.82	2	5	0.785	0.812	1
BRCA	MYH7	161	716	18	860	2	15	-0.76	-3.04	1.52	0.818	11.11	18.49	0.59	1	4	0.629	0.818	1
UCEC	COL7A1	55	386	10	431	1	9	0	-6.23	2.08	0.82	10	12.53	0.78	1	4	0.698	0.82	1
BRCA	ABCC4	318	586	12	892	5	7	0.49	-0.97	1.94	0.323	41.67	35.09	1.32	2	3	0.821	0.821	1
LUAD	MYH11	93	430	12	511	3	9	1.31	-2.62	3.92	0.357	25	17.61	1.54	1	3	0.821	0.821	1
BRCA	ABCA3	92	802	9	885	2	7	1.21	-1.21	2.42	0.264	22.22	10.17	2.49	1	3	0.822	0.822	1
LIHC	ABCA7	72	192	9	255	2	7	0	-4.77	3.82	0.633	22.22	27.45	0.76	1	3	0.822	0.822	1
LUSC	SYNJ2	83	382	9	456	2	7	0	-2.93	2.93	0.534	22.22	17.76	1.31	1	3	0.822	0.822	1
BRCA	ACACB	226	678	19	885	6	13	0.59	-1.77	2.65	0.365	31.58	24.86	1.38	2	5	0.832	0.832	1
BRCA	GNPTAB	102	638	11	729	2	9	0	-2.84	2.27	0.568	18.18	13.72	1.39	1	4	0.834	0.834	1
BRCA	CPT1B	163	718	12	870	2	9	0	-2.26	1.51	0.624	16.67	18.51	0.98	1	4	0.834	0.834	1
LUSC	MYH2	125	199	10	314	3	7	-1.3	-5.21	2.61	0.834	30	38.85	0.68	3	1	0.0227	0.834	1
BRCA	KCNH1	164	709	9	864	1	8	-0.75	-2.25	0.75	0.837	11.11	18.87	0.54	1	3	0.627	0.837	1
STAD	LRP2	109	262	16	355	4	12	-1.3	-6.5	2.6	0.841	25	29.58	0.8	3	4	0.229	0.841	1
BRCA	LRP1	150	754	28	876	3	25	-0.8	-4.4	1.6	0.85	10.71	16.78	0.6	2	2	0.0486	0.85	1
SKCM	RYR1	97	358	17	438	4	13	1.31	-3.28	4.59	0.434	23.53	21.23	1.14	1	4	0.856	0.856	1
LUAD	ABCA5	67	457	12	513	3	8	3.42	-0.86	5.13	0.111	25	12.48	2.56	1	3	0.861	0.861	1
LUSC	MYH3	196	262	10	448	7	3	1.78	-0.45	4.46	0.098	70	42.19	3.12	4	2	0.863	0.863	1
BLCA	FLNB	85	266	13	338	2	11	-1.55	-6.21	2.33	0.869	15.38	24.56	0.57	1	3	0.645	0.869	1
BRCA	H6PD	121	647	12	756	1	11	-0.98	-3.43	0.98	0.869	8.33	15.87	0.49	1	3	0.498	0.869	1
BRCA	ITPR3	217	687	13	891	2	11	-0.61	-2.73	0.91	0.871	15.38	24.13	0.58	1	4	0.756	0.871	1
LUAD	MYH1	69	447	11	506	2	8	1.67	-3.35	3.35	0.397	18.18	13.24	1.62	1	4	0.875	0.875	1
UCEC	COL27A1	114	332	10	436	2	8	0	-3.54	2.36	0.694	20	25.69	0.73	1	4	0.875	0.875	1
BRCA	APC	121	741	25	837	2	23	-0.96	-4.81	1.44	0.888	8	14.22	0.53	1	6	0.612	0.888	1
LUSC	DYSF	99	371	15	455	2	13	-1.28	-5.76	1.28	0.89	13.33	21.32	0.58	1	3	0.578	0.89	1
BLCA	MYH2	69	183	9	243	5	4	3.99	-2	8.98	0.129	55.56	26.34	3.32	2	2	0.891	0.891	1
HNSC	COL5A1	206	265	13	459	4	8	-1.73	-4.31	1.29	0.892	30.77	44.01	0.64	4	2	0.0232	0.892	1
COADREAD	COL4A1	157	293	10	440	3	7	-0.98	-3.91	1.96	0.794	30	35	0.8	1	3	0.9	0.9	1
GBM	ATP1A4	50	315	10	355	3	7	4.63	-2.32	6.95	0.169	30	13.24	2.7	1	3	0.9	0.9	1
BRCA	PTCH2	144	544	10	678	1	9	-0.88	-3.51	0.88	0.902	10	21.09	0.42	1	3	0.578	0.902	1
BRCA	PTCH1	107	551	14	644	1	13	-1.12	-4.46	1.12	0.903	7.14	16.46	0.4	1	3	0.438	0.903	1
BRCA	LRP4	119	784	18	885	1	17	-0.97	-3.87	0.97	0.91	5.56	13.33	0.39	1	3	0.351	0.91	1
OV	FBN3	221	140	10	352	4	5	-1.17	-4.67	1.75	0.91	40	61.65	0.51	3	1	0.104	0.91	1
BRCA	KCNH6	274	623	20	877	4	16	-1.05	-3.15	0.79	0.914	20	30.79	0.57	2	6	0.632	0.914	1
BRCA	TG	312	592	9	895	2	7	-0.49	-1.96	0.73	0.843	22.22	34.64	0.54	1	4	0.916	0.916	1
LUSC	SLC3A1	62	404	9	457	2	7	1.86	-2.79	3.72	0.373	22.22	13.13	1.86	1	4	0.916	0.916	1
BRCA	CAPN2	214	690	10	894	1	9	-0.61	-2.45	0.61	0.92	10	23.83	0.36	1	3	0.578	0.92	1
BRCA	FLNB	238	621	25	834	6	19	-0.58	-2.91	1.74	0.725	24	27.82	0.82	1	6	0.936	0.936	1
BRCA	ARSB	172	704	9	867	3	6	0.72	-0.72	2.17	0.26	33.33	19.49	2.05	1	3	0.938	0.938	1
LUSC	ABCC2	140	330	12	458	6	6	2.03	-1.02	4.07	0.211	50	29.26	2.36	3	4	0.939	0.939	1
COADREAD	SACS	83	367	13	437	1	12	-1.48	-6.65	1.48	0.943	7.69	18.76	0.37	1	4	0.572	0.943	1
BLCA	LRP1B	139	222	18	343	6	12	-1.17	-5.26	3.51	0.728	33.33	38.78	0.8	1	4	0.949	0.949	1
COADREAD	MYH6	132	316	9	439	1	8	-1.07	-4.3	1.07	0.949	11.11	29.84	0.3	1	3	0.627	0.949	1
BRCA	ABCA7	267	637	13	891	4	9	0.53	-1.33	1.86	0.42	30.77	29.52	1.06	1	4	0.95	0.95	1
LUSC	STAB2	123	347	13	457	4	9	1.1	-3.3	3.3	0.471	30.77	26.04	1.25	1	4	0.95	0.95	1
STAD	KCNH6	61	309	13	357	4	9	3.93	-1.96	7.85	0.186	30.77	15.97	2.25	1	4	0.95	0.95	1
BRCA	COL5A1	282	622	19	885	3	16	-1.55	-3.61	0.52	0.958	15.79	31.53	0.41	2	4	0.287	0.958	1
CESC	SCN10A	86	151	17	220	8	9	3.65	-3.65	9.13	0.252	47.06	35.45	1.56	2	4	0.961	0.961	1
BRCA	MTMR4	254	650	15	889	2	13	-1.1	-3.29	0.55	0.964	13.33	28.35	0.39	1	3	0.578	0.964	1
BRCA	MLC1	255	649	10	894	7	3	2.18	0.55	3.55	0.00894	70	27.74	5.94	3	2	0.964	0.964	1
LUAD	OGDHL	63	460	9	514	2	7	1.8	-2.71	3.61	0.36	22.22	11.87	2.09	1	5	0.969	0.969	1
LUSC	FLNB	244	196	14	426	10	4	1.84	-0.92	5.52	0.159	71.43	54.93	2.01	5	3	0.978	0.978	1
HNSC	COL27A1	209	262	9	462	4	5	-0.86	-2.58	1.72	0.764	44.44	44.37	1	1	3	0.987	0.987	1
BRCA	F5	324	580	22	882	3	19	-2.41	-4.33	-0.24	0.995	13.64	36.39	0.28	1	5	0.724	0.995	1
LUSC	KCNH6	124	344	9	459	7	2	4.39	1.65	7.13	0.00384	77.78	25.49	9.71	4	2	0.995	0.995	1
BRCA	CNGA4	164	739	9	894	0	9	-1.49	-2.98	0	1	0	18.34	0	0	4	1	1	1
BRCA	SLC3A1	85	801	10	876	1	9	0	-2.6	1.3	0.675	10	9.59	1.05	0	5	1	1	1
BRCA	ABCA9	193	711	16	889	1	14	-1.32	-3.29	0.66	0.966	6.25	21.6	0.26	0	5	1	1	1
BRCA	ANK2	142	762	17	887	2	15	0	-2.51	1.67	0.709	11.76	15.78	0.72	0	5	1	1	1
COADREAD	HK3	79	362	18	425	2	14	0	-5.4	3.08	0.761	11.11	18.12	0.65	0	5	1	1	1
COADREAD	LRP1	90	360	12	438	0	12	-2.78	-6.94	0	1	0	20.55	0	0	4	1	1	1
COADREAD	EP400	47	303	11	339	1	10	0	-7.37	2.46	0.82	9.09	13.57	0.64	0	5	1	1	1
GBM	COL7A1	37	323	10	350	1	9	0	-6.02	3.01	0.579	10	10.29	0.97	0	5	1	1	1
HNSC	SCN11A	158	313	11	460	4	7	0	-2.86	2.86	0.521	36.36	33.48	1.13	0	4	1	1	1
LGG	ABCC8	64	400	13	451	0	13	-1.81	-7.25	0	1	0	14.19	0	0	4	1	1	1
LUAD	FLNB	134	353	12	475	1	11	-2.06	-5.15	0.51	0.977	8.33	28	0.24	0	7	1	1	1
LUSC	MYH11	121	346	11	456	1	10	-2.23	-5.58	1.12	0.96	9.09	26.32	0.29	0	4	1	1	1
LUSC	LAMA3	84	386	10	461	2	7	0	-3.62	2.9	0.638	20	17.79	1.31	0	4	1	1	1
PRAD	RYR1	50	406	12	444	1	11	0	-6.74	2.25	0.75	8.33	11.04	0.74	0	4	1	1	1
THCA	RYR1	33	391	14	410	2	12	3.29	-3.29	6.57	0.29	14.29	7.56	1.97	0	5	1	1	1
UCEC	RYR1	76	370	22	425	3	18	0	-5.55	3.97	0.64	13.64	17.18	0.81	0	7	1	1	1
