# Supplementary material for: Systematic discovery of germline cancer predisposition genes through the identification of somatic second hits
Source: Nat Commun. 2018 Jul 4;9:2601. doi: 10.1038/s41467-018-04900-7 (PMC6031629; doi:10.1038/s41467-018-04900-7)
Supplement: Supplementary file 13 — Supplementary Data 11 [file 41467_2018_4900_MOESM13_ESM.xlsx]

## Sheet: Sheet1
Supplementary Data 11. Pan-cancer ALFRED analysis with putative LOH-or-somatic truncating-mutation model.
Gene	Num.of samples with AI or somatic truncation mutations (ST)	Num.of samples without either AI or ST	Num.of samples with RDGVs	Num.of samples without RDGVs	Num.of samples with RDGVs in AI or ST	Num.of samples with RDGVs in noAI or noST	Excess of RDGVs in AI or ST samples compared with noAI or noST samples (%)	Lower_95% CI	Upper_95% CI	Random_P	Samples with AI or ST in RDGV samples (%)	Samples with AI or ST in noRDGV samples (%)	Relative risk (RR)	Num.of samples with at least 10% increased VAF of RDGVs in AI or ST samples	Num.of samples with at least 10% increased VAF of RDGVs in noAI or noST samples	Binomial_P	ALFRED_P	FDR
BRCA1	1272	6149	199	7225	84	112	4.74	3.75	5.74	0	42.21	16.44	3.63	68	24	3.84e-30	3.84e-30	1.03e-26
BRCA2	2003	6907	133	8780	53	77	1.55	0.93	2.09	0	39.85	22.21	2.37	41	19	6.06e-15	6.06e-15	8.15e-12
MYH1	1170	7655	190	8638	50	137	2.46	1.53	3.3	0	26.32	12.97	2.39	30	22	7.33e-12	7.33e-12	6.57e-09
ATM	1379	7529	119	8789	42	77	2.06	1.42	2.7	0	35.29	15.21	2.98	28	20	1.07e-07	1.07e-07	7.2e-05
NSD1	1169	7710	180	8699	43	137	1.87	0.99	2.71	5.6e-05	23.89	12.94	2.07	20	15	1.2e-08	5.6e-05	0.0301
MNT	1577	5454	12	7019	9	3	0.57	0.29	0.74	8.2e-05	75	22.34	10.38	7	0	4.05e-05	8.2e-05	0.0354
KCNG4	1909	6974	40	8843	20	20	0.73	0.4	1.07	9.2e-05	50	21.36	3.65	12	3	3.02e-05	9.2e-05	0.0354
NOP56	1582	7212	24	8770	12	12	0.62	0.31	0.85	0.000232	50	17.9	4.56	5	0	8.35e-05	0.000232	0.078
MLH1	1452	6935	72	8316	24	47	1	0.46	1.5	0.000378	33.33	17.17	2.44	13	3	3.7e-09	0.000378	0.113
TPCN2	1347	7559	130	8777	34	95	1.31	0.57	1.92	0.000598	26.15	14.96	2.01	21	14	1.52e-09	0.000598	0.161
NIPAL3	1034	6579	62	7553	18	42	1.12	0.5	1.62	0.000726	29.03	13.45	2.73	13	6	2.36e-07	0.000726	0.178
INO80	957	7929	87	8801	19	66	1.17	0.47	1.76	0.00138	21.84	10.66	2.39	10	9	0.000154	0.00138	0.271
PATE2	1314	7560	18	8857	8	9	0.54	0.22	0.71	0.00141	44.44	14.75	5.11	4	0	0.000643	0.00141	0.271
ABCF3	1359	6981	64	8277	20	43	0.88	0.31	1.32	0.0016	31.25	16.18	2.39	13	9	7.6e-05	0.0016	0.287
GANC	1012	7896	86	8823	19	66	1.11	0.39	1.67	0.00175	22.09	11.25	2.25	11	10	5.87e-05	0.00175	0.294
ANK2	1134	7773	138	8769	30	108	1.21	0.45	1.97	0.00221	21.74	12.59	1.9	19	15	2e-09	0.00221	0.334
GUCY1A3	980	7921	32	8870	10	21	0.8	0.34	1.09	0.00136	31.25	10.94	3.85	7	4	0.00226	0.00226	0.334
HDAC10	1681	7215	16	8880	9	7	0.44	0.18	0.66	0.00115	56.25	18.83	5.52	4	0	0.00236	0.00236	0.334
BEST1	935	7966	69	8833	15	53	0.96	0.36	1.49	0.00309	21.74	10.42	2.41	8	9	0.00307	0.00309	0.416
GLDC	1674	6813	115	8375	34	78	0.89	0.26	1.49	0.00367	29.57	19.58	1.77	20	15	1.06e-06	0.00367	0.47
COLQ	1148	5997	75	7073	21	51	0.93	0.31	1.56	0.00392	28	15.93	2.15	13	10	7.2e-05	0.00392	0.479
COL7A1	1620	7217	222	8618	56	163	1.21	0.34	2	0.0043	25.23	18.15	1.53	27	47	0.00249	0.0043	0.503
DST	1263	7633	139	8760	31	105	1.11	0.32	1.8	0.00466	22.3	14.06	1.78	18	18	8.57e-07	0.00466	0.522
SCN10A	2179	6730	369	8547	110	252	1.28	0.33	2.25	0.00514	29.81	24.21	1.35	52	45	3.1e-12	0.00514	0.526
RYR1	2111	6792	318	8592	93	218	1.24	0.28	2.08	0.00569	29.25	23.49	1.37	34	52	0.00539	0.00569	0.526
USH2A	2634	6275	121	8789	49	71	0.7	0.19	1.24	0.0058	40.5	29.41	1.64	21	13	0.000125	0.0058	0.526
TULP4	1514	7395	15	8894	7	8	0.4	0.12	0.56	0.00617	46.67	16.94	4.27	5	0	2.57e-05	0.00617	0.526
KCNH5	1057	7851	70	8839	19	50	1.18	0.59	1.72	0.000252	27.14	11.74	2.82	10	11	0.00651	0.00651	0.526
ALDH9A1	955	7744	44	8655	11	33	0.71	0.24	1.18	0.00651	25	10.91	2.7	6	4	0.00242	0.00651	0.526
RCL1	1484	7403	12	8875	6	6	0.32	0.08	0.49	0.00659	50	16.65	4.99	5	1	0.00641	0.00659	0.526
ECEL1	1336	7557	38	8855	12	26	0.53	0.18	0.88	0.00669	31.58	14.95	2.61	8	5	0.00141	0.00669	0.526
KRT24	1018	5542	58	6504	16	40	0.93	0.23	1.45	0.0067	27.59	15.41	2.18	13	6	5.04e-08	0.0067	0.526
ABCC12	1062	7842	167	8739	31	134	1.18	0.27	2.03	0.00696	18.56	11.8	1.71	17	21	1.35e-06	0.00696	0.526
HK3	1155	7717	220	8655	42	175	1.29	0.35	2.24	0.00704	19.09	12.86	1.6	19	42	0.00312	0.00704	0.526
HOGA1	1538	6267	60	7746	20	39	0.65	0.16	1.13	0.00736	33.33	19.6	2.09	9	5	0.00107	0.00736	0.526
ALOX12B	3232	5629	49	8814	26	21	0.44	0.1	0.73	0.00741	53.06	36.37	2.16	10	3	0.00638	0.00741	0.526
BBS1	1150	7730	68	8815	16	49	0.8	0.2	1.25	0.00668	23.53	12.86	2.19	6	5	0.00747	0.00747	0.526
KRT36	1080	7828	63	8845	15	48	0.74	0.21	1.26	0.00763	23.81	12.04	2.27	11	7	2.22e-06	0.00763	0.526
ABCC4	2251	6656	106	8803	37	67	0.65	0.15	1.16	0.00792	34.91	25.15	1.63	16	7	9.68e-07	0.00792	0.533
MUC17	1424	7397	45	8776	14	31	0.59	0.13	0.92	0.00846	31.11	16.07	2.35	10	6	0.00013	0.00846	0.555
TP63	1145	7338	46	8438	15	30	0.91	0.4	1.31	0.00043	32.61	13.39	3.2	8	6	0.00942	0.00942	0.565
CTSB	2544	6365	50	8860	22	27	0.44	0.08	0.77	0.00951	44	28.47	2.04	13	1	2.06e-11	0.00951	0.565
RB1	1009	7879	50	8838	12	38	0.67	0.17	1.12	0.00955	24	11.28	2.47	7	7	0.00558	0.00955	0.565
THBS3	1275	7603	100	8780	23	75	0.82	0.18	1.42	0.00965	23	14.26	1.83	13	21	0.00676	0.00965	0.565
SLC12A4	1062	7843	83	8822	19	64	1.07	0.37	1.6	0.00175	22.89	11.82	2.19	10	15	0.00985	0.00985	0.565
SLC7A8	1153	7692	80	8766	18	61	0.8	0.15	1.3	0.0101	22.5	12.95	1.97	9	12	0.00703	0.0101	0.565
TAGLN	1586	7323	27	8882	10	17	0.46	0.08	0.69	0.0104	37.04	17.74	2.72	7	4	0.00756	0.0104	0.565
ALK	1319	7590	42	8868	12	29	0.53	0.13	0.89	0.0104	28.57	14.74	2.38	8	4	0.000162	0.0104	0.565
ACACA	1081	7826	38	8870	10	27	0.63	0.16	0.95	0.0105	26.32	12.07	2.68	6	4	0.00382	0.0105	0.565
MTMR9	1084	6341	83	7345	20	60	0.86	0.16	1.51	0.0108	24.1	14.49	1.95	11	10	0.000252	0.0108	0.569
ABCC6	1209	7698	121	8786	26	95	0.96	0.24	1.58	0.00869	21.49	13.46	1.74	10	16	0.011	0.011	0.569
ARHGAP9	1164	7744	21	8887	7	14	0.4	0.1	0.69	0.0113	33.33	13.02	3.33	4	0	7.76e-05	0.0113	0.572
LYST	1427	6132	25	7534	10	15	0.43	0.09	0.78	0.0116	40	18.81	2.86	6	0	3.76e-07	0.0116	0.572
SLC45A1	1357	6981	38	8300	12	26	0.53	0.13	0.88	0.0117	31.58	16.2	2.37	7	5	0.00778	0.0117	0.572
DDX60	908	6815	15	7708	6	9	0.5	0.12	0.75	0.00675	40	11.7	5	4	1	0.0121	0.0121	0.581
BLK	1320	7581	42	8859	12	30	0.53	0.09	0.89	0.0124	28.57	14.76	2.3	6	4	0.00639	0.0124	0.585
MLH3	1224	7683	66	8842	17	48	0.76	0.24	1.23	0.00488	25.76	13.65	2.22	9	11	0.0128	0.0128	0.594
MTMR7	1875	7033	78	8831	25	52	0.61	0.1	1.05	0.0136	32.05	20.95	1.8	10	7	0.00193	0.0136	0.603
DNAH3	1574	7334	159	8752	39	117	0.85	0.12	1.58	0.0142	24.53	17.54	1.55	23	14	1.21e-11	0.0142	0.603
THBS4	936	6109	111	6936	23	86	1.11	0.18	1.85	0.0144	20.72	13.16	1.75	14	16	2.2e-05	0.0144	0.603
ABCA6	1699	7208	139	8770	37	100	0.8	0.15	1.42	0.0118	26.62	18.95	1.57	13	18	0.0145	0.0145	0.603
RPH3AL	1561	6520	29	8052	13	16	0.64	0.24	0.87	0.00127	44.83	19.23	3.39	8	4	0.0148	0.0148	0.603
SLC7A2	1550	7237	98	8690	26	71	0.71	0.12	1.25	0.0156	26.53	17.54	1.71	13	10	3.57e-05	0.0156	0.603
CYB5R2	1814	7095	47	8863	16	30	0.48	0.07	0.8	0.0156	34.04	20.29	2.09	10	9	0.0149	0.0156	0.603
TNKS	1412	7497	9	8900	5	4	0.34	0.08	0.42	0.00795	55.56	15.81	6.64	3	0	0.0158	0.0158	0.603
FAM166A	1329	7485	31	8783	12	19	0.71	0.27	0.97	0.000962	38.71	14.99	3.56	6	3	0.016	0.016	0.603
CNTN3	1254	7023	7	8270	4	3	0.28	0.09	0.38	0.0147	57.14	15.11	7.47	3	0	0.0161	0.0161	0.603
ZSCAN22	899	8000	5	8894	3	2	0.37	0.12	0.37	0.00855	60	10.07	13.35	3	0	0.0162	0.0162	0.603
PRPF8	2520	6061	35	8546	20	15	0.51	0.22	0.81	0.000814	57.14	29.25	3.21	11	4	0.0163	0.0163	0.603
CAPN12	1207	7258	44	8421	12	32	0.58	0.1	0.97	0.0164	27.27	14.19	2.25	7	6	0.00641	0.0164	0.603
PNLIP	1625	7284	20	8889	8	12	0.38	0.08	0.53	0.0165	40	18.19	2.99	7	1	7.92e-06	0.0165	0.603
MYO16	1933	6949	58	8824	23	35	0.66	0.26	1.06	0.00182	39.66	21.65	2.36	10	7	0.0167	0.0167	0.603
MYH8	1933	6974	123	8785	37	85	0.66	0.1	1.26	0.0167	30.08	21.58	1.57	21	13	2.38e-08	0.0167	0.603
MLKL	1566	7319	43	8842	14	29	0.47	0.08	0.85	0.015	32.56	17.55	2.26	6	4	0.0168	0.0168	0.603
PKD2L1	1571	7025	53	8544	16	36	0.55	0.08	0.9	0.0181	30.19	18.2	1.99	8	5	0.00164	0.0181	0.64
NCOR1	1985	5698	32	7651	14	18	0.41	0.07	0.71	0.0184	43.75	25.76	2.23	12	0	4.66e-17	0.0184	0.64
TTC19	1528	5999	25	7502	10	15	0.41	0.08	0.7	0.0187	40	20.23	2.62	7	2	0.000418	0.0187	0.64
NLRP12	1083	7793	89	8788	18	70	0.74	0.11	1.37	0.0188	20.22	12.12	1.85	8	9	0.00195	0.0188	0.64
SACS	1876	7032	241	8671	64	173	0.95	0.1	1.72	0.0192	26.56	20.9	1.39	37	19	5.26e-19	0.0192	0.646
HAL	1659	7249	111	8799	29	80	0.67	0.07	1.22	0.02	26.13	18.52	1.58	19	10	1.79e-10	0.02	0.647
WDR11	1339	6577	76	7841	20	55	0.72	0.04	1.21	0.0203	26.32	16.82	1.79	12	10	0.000101	0.0203	0.647
SGSH	2117	6782	29	8871	12	16	0.31	0.03	0.59	0.0205	41.38	23.73	2.4	8	3	0.00152	0.0205	0.647
CSF2RA	1834	6999	86	8749	26	58	0.55	0.03	1.07	0.0208	30.23	20.67	1.71	16	5	1.55e-10	0.0208	0.647
MX1	1596	7281	78	8801	27	49	0.99	0.5	1.49	0.000166	34.62	17.83	2.51	11	10	0.0211	0.0211	0.647
SLC28A3	1003	4548	10	5541	5	5	0.37	0.06	0.61	0.0212	50	18.01	4.53	3	0	0.00955	0.0212	0.647
LRCH3	1189	7715	18	8886	6	12	0.39	0.05	0.58	0.0212	33.33	13.31	3.24	5	2	0.0039	0.0212	0.647
CCDC125	1120	7630	10	8741	4	5	0.31	0.05	0.41	0.0212	40	12.77	5.45	3	0	0.00509	0.0212	0.647
ABCC2	1638	7270	206	8706	48	154	0.9	0.04	1.65	0.0215	23.3	18.26	1.38	29	26	4.37e-11	0.0215	0.647
KCNK10	1105	7764	27	8843	8	18	0.52	0.1	0.78	0.013	29.63	12.41	3.12	4	2	0.0218	0.0218	0.647
ABCA12	1472	7438	129	8783	30	97	0.73	0.04	1.38	0.0219	23.26	16.42	1.56	13	18	0.00259	0.0219	0.647
TECTA	1612	7287	69	8830	20	49	0.53	0.04	0.98	0.0223	28.99	18.03	1.85	11	8	0.000225	0.0223	0.648
MOV10L1	2206	6697	91	8814	31	58	0.54	0.03	0.99	0.0224	34.07	24.68	1.62	13	10	0.0021	0.0224	0.648
DPYD	1051	7771	93	8729	18	75	0.76	0.05	1.35	0.0235	19.35	11.83	1.77	8	14	0.0177	0.0235	0.668
FBN1	964	7944	89	8820	17	71	0.81	0.06	1.4	0.0236	19.1	10.74	1.97	11	9	2.73e-06	0.0236	0.668
UBASH3A	1781	7096	19	8859	8	10	0.35	0.07	0.49	0.0147	42.11	20.01	3.19	4	1	0.0246	0.0246	0.685
VANGL1	1215	7271	36	8450	10	26	0.48	0.05	0.82	0.0253	27.78	14.26	2.3	5	4	0.0245	0.0253	0.685
PCCA	1189	7691	54	8826	13	41	0.58	0.05	0.97	0.0255	24.07	13.32	2.05	7	7	0.00612	0.0255	0.685
BARX2	902	6749	28	7623	8	20	0.63	0.13	0.94	0.0146	28.57	11.73	2.99	5	4	0.0261	0.0261	0.685
TNFRSF13B	1672	7217	86	8803	24	62	0.59	0.04	1.07	0.0261	27.91	18.72	1.67	17	15	5.83e-06	0.0261	0.685
TRPM5	1175	7514	25	8664	8	17	0.49	0.15	0.79	0.00859	32	13.47	3.01	4	2	0.0262	0.0262	0.685
MAN1B1	1505	7351	23	8833	8	15	0.32	0.04	0.56	0.0266	34.78	16.95	2.61	6	1	4.44e-05	0.0266	0.685
MASP1	1073	7825	93	8807	18	73	0.74	0.05	1.32	0.0267	19.35	11.98	1.8	7	10	0.0122	0.0267	0.685
RRH	861	8047	15	8893	5	10	0.51	0.13	0.64	0.0139	33.33	9.63	4.67	4	2	0.0268	0.0268	0.685
ATP13A2	1711	7187	53	8845	18	35	0.58	0.14	0.94	0.00864	33.96	19.14	2.16	10	10	0.0269	0.0269	0.685
MSH3	1290	7612	89	8816	20	66	0.63	0.05	1.18	0.027	22.47	14.41	1.79	12	10	1.59e-05	0.027	0.685
CASP8	1052	7325	25	8353	7	17	0.43	0.05	0.76	0.0237	28	12.51	2.87	5	4	0.0273	0.0273	0.686
ABCC3	1444	7436	147	8735	33	112	0.74	0.04	1.45	0.0276	22.45	16.15	1.52	19	18	1.73e-07	0.0276	0.687
FECH	1258	7648	47	8859	12	35	0.46	0.05	0.88	0.0281	25.53	14.06	2.08	9	5	1.8e-05	0.0281	0.693
SULT6B1	1050	7859	15	8894	5	10	0.32	0.05	0.54	0.029	33.33	11.75	3.74	4	1	0.00412	0.029	0.709
EEF1D	1378	7404	35	8748	10	24	0.43	0	0.73	0.03	28.57	15.64	2.24	5	2	0.00275	0.03	0.727
H6PD	1227	6509	106	7631	24	81	0.77	0	1.4	0.0311	22.64	15.76	1.57	17	20	7.36e-06	0.0311	0.746
SLFN11	1041	7864	15	8890	5	10	0.33	0	0.54	0.0314	33.33	11.65	3.78	5	1	0.000251	0.0314	0.746
PNPLA7	923	7822	59	8687	11	47	0.61	0	1.09	0.0319	18.64	10.5	1.98	7	8	0.00187	0.0319	0.746
EMR1	1798	7110	50	8859	16	33	0.42	0	0.77	0.0319	32	20.12	1.92	10	3	1.31e-06	0.0319	0.746
ENPP3	1112	7781	42	8852	12	29	0.72	0.26	1.08	0.00395	28.57	12.43	2.9	5	4	0.0342	0.0342	0.793
GALNS	1270	7427	50	8649	12	36	0.46	0	0.88	0.0346	24	14.55	1.95	9	9	0.00122	0.0346	0.796
SLC5A9	926	7979	65	8840	12	53	0.6	0	1.14	0.0345	18.46	10.34	1.95	7	14	0.0355	0.0355	0.809
SI	1589	7291	213	8673	48	159	0.84	-0.04	1.61	0.0358	22.54	17.77	1.39	27	24	1.48e-10	0.0358	0.809
GABRR2	1100	7336	15	8421	5	10	0.31	0	0.52	0.0369	33.33	13	3.33	4	1	0.00412	0.0369	0.825
FBN3	2619	6288	216	8695	75	137	0.65	-0.03	1.38	0.0373	34.72	29.26	1.31	35	25	3.62e-08	0.0373	0.825
SMPD3	1135	6992	19	8108	6	13	0.41	0	0.61	0.0374	31.58	13.92	2.84	6	1	9.62e-06	0.0374	0.825
LEPRE1	969	7939	18	8890	5	13	0.35	0	0.58	0.0379	27.78	10.84	3.15	5	1	7.72e-05	0.0379	0.829
NF1	1593	7317	31	8879	10	21	0.38	0	0.61	0.0389	32.26	17.83	2.19	6	1	3.44e-05	0.0389	0.844
KATNAL2	1576	7324	52	8848	15	37	0.46	0	0.81	0.0393	28.85	17.64	1.88	14	10	1e-06	0.0393	0.845
ACLY	928	7950	54	8824	11	43	0.72	0.12	1.14	0.019	20.37	10.39	2.19	5	7	0.0397	0.0397	0.845
PANK4	1410	7366	36	8740	13	23	0.59	0.25	0.93	0.00218	36.11	15.98	2.95	8	7	0.0399	0.0399	0.845
FLCN	2188	6330	79	8440	27	51	0.43	-0.03	0.89	0.0405	34.18	25.6	1.53	15	8	6.92e-06	0.0405	0.851
TIAM2	2095	6814	20	8889	9	11	0.25	0	0.5	0.0303	45	23.47	2.66	6	3	0.0415	0.0415	0.851
SCN2B	1552	7058	15	8595	6	9	0.24	0	0.47	0.0417	40	17.99	3.03	4	1	0.0121	0.0417	0.851
TULP2	1807	6423	42	8188	14	28	0.35	0	0.71	0.0418	33.33	21.9	1.78	9	9	0.0275	0.0418	0.851
GCAT	955	7818	40	8734	8	31	0.47	0	0.82	0.0419	20	10.84	2.11	6	7	0.00713	0.0419	0.851
GPSM2	1233	6264	38	7459	12	26	0.58	0.05	0.97	0.02	31.58	16.37	2.34	7	7	0.0423	0.0423	0.851
PCDHB14	1407	7421	21	8807	7	14	0.34	0	0.55	0.0424	33.33	15.9	2.64	2	0	0.0272	0.0424	0.851
KIF24	1624	6839	38	8425	12	26	0.38	0	0.69	0.0437	31.58	19.13	1.94	7	6	0.0198	0.0437	0.871
WDR91	1369	7524	18	8875	6	12	0.26	0	0.52	0.0443	33.33	15.36	2.75	5	1	0.000351	0.0443	0.874
DCBLD1	989	5694	44	6640	11	32	0.59	0	1.07	0.0446	25	14.73	1.98	8	8	0.00341	0.0446	0.874
ANO5	916	7974	42	8849	8	33	0.49	0	0.85	0.0453	19.05	10.26	2.11	6	3	7.58e-05	0.0453	0.874
TNN	2004	6902	39	8867	14	25	0.32	-0.03	0.64	0.0457	35.9	22.44	1.93	7	3	0.00191	0.0457	0.874
ARMC4	973	6463	75	7363	15	58	0.71	-0.06	1.3	0.046	20	13.01	1.72	10	11	0.000198	0.046	0.874
AIM1	1905	7004	55	8854	18	37	0.4	0	0.77	0.0393	32.73	21.31	1.79	6	5	0.0462	0.0462	0.874
CATSPER3	1156	7632	65	8723	14	51	0.5	-0.05	1	0.0463	21.54	13.09	1.81	9	4	8.38e-07	0.0463	0.874
SMPDL3B	1209	7497	53	8654	12	40	0.48	-0.05	0.86	0.047	22.64	13.83	1.86	7	9	0.0161	0.047	0.874
SLC5A10	1705	6919	65	8560	18	46	0.44	-0.04	0.84	0.047	27.69	19.71	1.59	12	6	9.51e-07	0.047	0.874
ROR1	907	8002	14	8895	4	10	0.37	0	0.49	0.0471	28.57	10.15	3.53	4	2	0.0109	0.0471	0.874
ERICH1	1279	7539	6	8812	3	3	0.18	0	0.27	0.0481	50	14.48	5.89	3	0	0.00708	0.0481	0.883
TEX15	1340	7569	23	8886	7	16	0.35	0	0.57	0.0487	30.43	15	2.47	3	1	0.0274	0.0487	0.883
ZNF468	1120	7603	11	8712	4	7	0.31	0	0.41	0.0399	36.36	12.81	3.88	3	1	0.0488	0.0488	0.883
CNTN2	1128	7651	28	8751	7	21	0.41	0	0.66	0.0489	25	12.81	2.26	4	2	0.00799	0.0489	0.883
MATK	1597	7198	12	8783	5	7	0.23	0	0.38	0.0502	41.67	18.13	3.22	3	0	0.00423	0.0502	0.9
ABCC11	1345	6020	118	7251	28	86	0.64	-0.09	1.36	0.0508	23.73	18.16	1.46	16	20	0.000241	0.0508	0.9
DSP	1934	6975	77	8833	23	53	0.46	-0.03	0.86	0.0511	29.87	21.63	1.57	15	7	5.16e-08	0.0511	0.9
SLC2A4	3307	5583	20	8870	12	8	0.24	0.02	0.43	0.0289	60	37.15	2.53	5	1	0.0512	0.0512	0.9
GJB3	1118	6886	41	7963	10	31	0.42	-0.05	0.83	0.0522	24.39	13.91	1.99	7	5	0.000764	0.0522	0.911
SERPINA5	1192	7010	36	8167	9	26	0.39	-0.05	0.79	0.0525	25	14.49	2.04	5	3	0.00523	0.0525	0.911
PLEKHG1	2026	6849	16	8859	7	9	0.19	0	0.38	0.0536	43.75	22.79	2.63	4	1	0.0214	0.0536	0.912
FREM2	2598	6312	21	8889	10	11	0.22	-0.03	0.43	0.0541	47.62	29.11	2.21	6	2	0.0143	0.0541	0.912
COL15A1	1706	6737	105	8340	28	75	0.51	-0.07	1.07	0.0542	26.67	20.12	1.47	13	14	0.00137	0.0542	0.912
MFSD6L	1548	5075	39	6584	14	25	0.42	-0.04	0.84	0.0543	35.9	23.3	1.84	8	4	0.00162	0.0543	0.912
SLC2A11	1016	7505	28	8493	7	21	0.45	0	0.78	0.0353	25	11.88	2.46	5	6	0.0545	0.0545	0.912
HPS3	1411	7496	22	8885	7	15	0.34	0	0.55	0.0546	31.82	15.8	2.48	5	1	0.000318	0.0546	0.912
VPS13D	1380	7528	27	8881	8	19	0.34	0	0.6	0.0518	29.63	15.45	2.3	4	3	0.0562	0.0562	0.915
GARNL3	1240	7558	41	8758	12	28	0.56	0.14	0.94	0.00746	29.27	14.02	2.61	8	10	0.0562	0.0562	0.915
HEMGN	999	6937	7	7929	3	4	0.23	0	0.34	0.0566	42.86	12.56	5.21	2	0	0.0523	0.0566	0.915
SLC4A7	1507	7370	44	8834	14	29	0.56	0.12	0.88	0.00902	31.82	16.9	2.36	7	7	0.0566	0.0566	0.915
MYH4	1824	4778	189	6415	63	124	0.76	-0.15	1.63	0.0572	33.33	27.45	1.33	39	16	6.48e-19	0.0572	0.915
ZNF471	1610	7283	27	8866	10	17	0.38	0.08	0.68	0.0133	37.04	18.05	2.66	3	1	0.0575	0.0575	0.915
DPYSL4	1946	6784	26	8705	10	15	0.33	0	0.53	0.0302	38.46	22.24	2.32	6	4	0.0589	0.0589	0.915
KRT14	1520	7388	35	8873	10	25	0.32	-0.04	0.63	0.0596	28.57	17.02	1.94	7	3	0.00016	0.0596	0.915
ENTPD4	1400	6015	20	7395	7	13	0.26	0	0.53	0.0596	35	18.84	2.31	3	1	0.0455	0.0596	0.915
POSTN	1497	6434	90	7842	23	66	0.49	-0.08	1.07	0.0597	25.56	18.8	1.5	15	10	2.65e-07	0.0597	0.915
WDR63	1436	7473	10	8899	4	6	0.25	0	0.33	0.0598	40	16.09	3.47	2	0	0.0441	0.0598	0.915
GPR133	1653	7250	22	8882	8	13	0.3	0	0.52	0.0307	36.36	18.52	2.7	4	2	0.06	0.06	0.915
NELL2	929	7623	61	8492	11	49	0.6	-0.06	1.09	0.0559	18.03	10.81	1.84	5	9	0.06	0.06	0.915
CRAT	1328	7581	58	8852	14	43	0.44	-0.04	0.88	0.06	24.14	14.84	1.86	9	8	0.0006	0.06	0.915
OR52W1	1513	7395	9	8899	4	5	0.24	0	0.32	0.0601	44.44	16.96	3.91	2	0	0.0586	0.0601	0.915
PARVG	1049	7843	28	8864	7	21	0.43	0	0.7	0.0393	25	11.76	2.49	4	4	0.0605	0.0605	0.915
KLKB1	2166	6679	38	8808	14	23	0.31	-0.03	0.58	0.0609	36.84	24.43	1.88	6	3	0.0147	0.0609	0.915
AIRE	1252	7240	30	8462	8	22	0.37	-0.05	0.66	0.0612	26.67	14.7	2.1	5	4	0.0178	0.0612	0.915
SBNO1	964	7944	44	8867	8	33	0.47	-0.06	0.81	0.0619	18.18	10.78	2	5	6	0.0162	0.0619	0.915
TNFRSF10B	1587	7274	31	8831	9	21	0.31	-0.04	0.58	0.0621	29.03	17.87	1.96	6	4	0.00715	0.0621	0.915
IRF3	969	7370	32	8307	7	25	0.47	-0.06	0.76	0.0622	21.88	11.58	2.13	5	6	0.0273	0.0622	0.915
MYO1C	2724	6183	74	8834	30	43	0.42	0	0.82	0.0343	40.54	30.5	1.58	14	13	0.0634	0.0634	0.915
ABCB8	1790	7080	84	8788	23	59	0.42	-0.1	0.91	0.0638	27.38	20.11	1.54	10	12	0.0167	0.0638	0.915
ZNF620	948	5133	12	6070	4	7	0.37	0	0.5	0.0639	33.33	15.55	3.09	3	1	0.0488	0.0639	0.915
UGT1A9	1641	7106	9	8738	4	5	0.15	0	0.3	0.0639	44.44	18.73	3.46	2	0	0.0586	0.0639	0.915
SLC26A2	1187	7721	96	8814	18	76	0.58	-0.1	1.12	0.0644	18.75	13.26	1.54	12	13	1.24e-05	0.0644	0.915
PAPLN	1339	7537	29	8848	8	20	0.35	-0.04	0.62	0.0646	27.59	15.04	2.25	4	2	0.0154	0.0646	0.915
IQGAP2	2428	6481	47	8862	18	29	0.28	-0.06	0.62	0.0654	38.3	27.19	1.66	7	3	0.00413	0.0654	0.915
ATP8B4	1231	7677	103	8807	20	81	0.57	-0.14	1.18	0.0655	19.42	13.75	1.54	15	18	2.62e-06	0.0655	0.915
MRE11A	1154	7733	40	8847	9	31	0.4	-0.05	0.75	0.0656	22.5	12.94	1.95	6	5	0.00287	0.0656	0.915
MYO9A	920	7984	175	8734	24	146	0.85	-0.18	1.7	0.0657	13.71	10.26	1.43	10	20	0.00121	0.0657	0.915
PPP1R12C	1155	7066	12	8209	4	8	0.3	0	0.4	0.0659	33.33	14.02	3.06	3	1	0.0355	0.0659	0.915
CHRNA10	1292	7603	31	8864	9	22	0.45	0.05	0.72	0.0262	29.03	14.47	2.41	5	5	0.0661	0.0661	0.915
TMEM180	1925	6818	39	8704	13	26	0.33	-0.07	0.6	0.0663	33.33	21.97	1.77	6	1	5.98e-05	0.0663	0.915
KLK12	1418	7484	15	8887	5	10	0.25	0	0.42	0.0682	33.33	15.9	2.64	2	0	0.0274	0.0682	0.931
DNAH8	2370	6537	83	8826	28	53	0.4	-0.09	0.8	0.0689	33.73	26.54	1.46	9	6	0.00553	0.0689	0.931
PYGM	946	7956	123	8779	19	104	0.71	-0.18	1.42	0.069	15.45	10.56	1.54	15	18	3.08e-08	0.069	0.931
OTOF	1294	7607	128	8774	25	102	0.63	-0.14	1.27	0.069	19.53	14.46	1.44	11	22	0.0154	0.069	0.931
LDLR	1395	7511	80	8826	18	62	0.51	-0.13	0.98	0.0696	22.5	15.6	1.56	9	9	0.000877	0.0696	0.931
USP6	2567	6335	19	8883	9	10	0.22	-0.03	0.38	0.0707	47.37	28.8	2.22	7	2	0.00194	0.0707	0.931
TMPRSS9	1790	7056	46	8803	13	30	0.28	-0.07	0.63	0.0714	28.26	20.19	1.71	10	4	2.36e-06	0.0714	0.931
MBD1	1501	7312	42	8772	11	30	0.32	-0.08	0.68	0.0716	26.19	16.99	1.79	5	3	0.00732	0.0716	0.931
PRSS55	1643	7207	55	8796	15	39	0.37	-0.07	0.75	0.0719	27.27	18.51	1.69	6	3	0.00166	0.0719	0.931
ALPL	1106	6008	40	7075	10	29	0.43	-0.11	0.86	0.072	25	15.49	1.87	7	10	0.0501	0.072	0.931
ABCA8	958	7651	142	8471	21	117	0.7	-0.18	1.47	0.072	14.79	11.06	1.43	13	24	9.75e-05	0.072	0.931
FGA	1366	7439	66	8739	15	51	0.43	-0.09	0.87	0.0724	22.73	15.46	1.6	7	7	0.00447	0.0724	0.931
ATP13A5	1845	7060	71	8835	20	50	0.41	-0.1	0.82	0.0726	28.17	20.66	1.53	8	10	0.0502	0.0726	0.931
KCNA10	909	7602	62	8449	18	44	1.35	0.8	1.97	7.2e-05	29.03	10.55	3.42	5	5	0.0731	0.0731	0.931
CHD3	2311	6475	38	8749	14	23	0.29	-0.06	0.56	0.0732	36.84	26.25	1.71	6	3	0.0147	0.0732	0.931
ACACB	1847	7056	192	8713	48	142	0.61	-0.17	1.33	0.0734	25	20.65	1.29	23	31	9.95e-05	0.0734	0.931
MYH2	1349	4833	146	6038	40	104	0.76	-0.24	1.66	0.074	27.4	21.68	1.38	25	12	1.16e-13	0.074	0.931
PLA2G5	1049	7377	4	8422	2	2	0.22	0	0.22	0.0691	50	12.43	7.03	2	0	0.0741	0.0741	0.931
CGNL1	1352	7556	29	8879	8	21	0.35	-0.04	0.61	0.0741	27.59	15.14	2.13	4	3	0.0412	0.0741	0.931
PASK	1755	7077	49	8783	14	35	0.36	-0.07	0.68	0.0748	28.57	19.82	1.61	9	8	0.00275	0.0748	0.936
PKLR	939	7934	68	8806	11	56	0.48	-0.12	1.01	0.0756	16.18	10.54	1.66	7	12	0.00672	0.0756	0.94
EPHX2	1781	6281	15	8047	6	9	0.22	-0.04	0.4	0.0758	40	22.06	2.35	3	0	0.00376	0.0758	0.94
SLC43A2	1364	7424	11	8777	4	7	0.17	0	0.35	0.0767	36.36	15.5	3.11	4	2	0.0358	0.0767	0.946
CLCN6	1912	6997	83	8828	23	58	0.4	-0.1	0.83	0.0778	27.71	21.4	1.45	13	8	5.97e-06	0.0778	0.954
TECTB	1209	6937	34	8112	10	24	0.49	0.05	0.83	0.0232	29.41	14.78	2.39	6	7	0.0782	0.0782	0.954
CCS	954	7946	22	8878	5	17	0.35	-0.06	0.59	0.0784	22.73	10.69	2.45	3	2	0.0386	0.0784	0.954
TRIM52	1049	4931	6	5974	3	3	0.23	0	0.35	0.0777	50	17.51	4.7	2	0	0.0789	0.0789	0.956
RNF213	2290	6572	41	8821	15	26	0.29	-0.06	0.56	0.0795	36.59	25.79	1.66	6	2	0.00222	0.0795	0.959
SLC22A1	1921	6925	29	8817	10	19	0.27	-0.07	0.53	0.0804	34.48	21.67	1.9	6	3	0.00593	0.0804	0.962
SLC1A5	932	6519	8	7443	4	4	0.37	0.12	0.49	0.0111	50	12.47	6.99	2	0	0.0815	0.0815	0.962
GBGT1	1681	7210	8	8883	4	4	0.15	0	0.29	0.0615	50	18.88	4.29	2	0	0.0815	0.0815	0.962
OR10X1	1196	7009	8	8197	4	4	0.29	0.1	0.39	0.0176	50	14.54	5.86	2	0	0.0815	0.0815	0.962
ALDOB	1004	5388	74	6321	16	55	0.59	-0.18	1.24	0.0816	21.62	15.63	1.56	8	12	0.0211	0.0816	0.962
ALG11	1225	6796	21	8001	6	14	0.29	-0.05	0.58	0.0819	28.57	15.24	2.38	3	1	0.0257	0.0819	0.962
PSG5	1002	6740	13	7729	4	9	0.23	-0.06	0.46	0.083	30.77	12.91	2.99	2	0	0.0226	0.083	0.962
ECM1	1340	7561	32	8870	10	21	0.44	0.09	0.79	0.0136	31.25	14.99	2.69	4	3	0.0831	0.0831	0.962
LMAN2	1278	7580	22	8836	6	16	0.27	-0.05	0.55	0.0837	27.27	14.4	2.22	3	1	0.0183	0.0837	0.962
TAAR5	915	7197	12	8100	5	7	0.49	0.12	0.62	0.00603	41.67	11.23	5.62	3	1	0.0841	0.0841	0.962
LPP	1221	7576	29	8769	7	21	0.29	-0.1	0.57	0.0842	24.14	13.84	2.07	4	2	0.00799	0.0842	0.962
LMAN1	1285	6955	7	8233	3	4	0.18	0	0.28	0.0846	42.86	15.57	4.06	3	0	0.0037	0.0846	0.962
PARK2	1374	7531	67	8838	15	52	0.43	-0.13	0.86	0.0847	22.39	15.38	1.58	9	12	0.00494	0.0847	0.962
PCDHB11	1839	7070	15	8895	7	7	0.27	0.07	0.48	0.0122	46.67	20.6	3.84	2	0	0.085	0.085	0.962
CHD5	2452	6399	65	8787	23	41	0.28	-0.08	0.68	0.0864	35.38	27.64	1.46	10	6	0.00189	0.0864	0.962
LIPA	1456	6308	13	7751	5	8	0.25	-0.04	0.42	0.0869	38.46	18.72	2.71	3	1	0.0623	0.0869	0.962
DNAJC6	916	6669	81	7506	14	65	0.62	-0.19	1.24	0.087	17.28	12.02	1.57	6	11	0.0335	0.087	0.962
SETX	1552	7357	152	8761	33	115	0.55	-0.2	1.21	0.087	21.71	17.34	1.36	11	19	0.0198	0.087	0.962
ZNF347	1331	7549	27	8853	7	20	0.27	-0.09	0.53	0.087	25.93	14.96	1.99	5	3	0.00461	0.087	0.962
F10	1843	7063	60	8847	17	42	0.34	-0.1	0.72	0.0873	28.33	20.64	1.55	8	10	0.0502	0.0873	0.962
FBLN1	1196	7710	45	8861	10	35	0.39	-0.1	0.77	0.0873	22.22	13.38	1.84	5	6	0.0338	0.0873	0.962
TH	935	7445	41	8339	8	33	0.36	-0.12	0.84	0.0887	19.51	11.12	1.93	4	4	0.0222	0.0887	0.974
COL11A1	1896	7013	117	8792	31	86	0.47	-0.17	0.97	0.0899	26.5	21.21	1.33	16	13	5.5e-06	0.0899	0.983
MUT	1033	7836	105	8765	17	87	0.55	-0.16	1.21	0.0911	16.19	11.59	1.48	10	16	0.000532	0.0911	0.992
SLC7A6	1082	7239	29	8292	8	21	0.42	0	0.74	0.0318	27.59	12.95	2.55	4	4	0.0918	0.0918	0.994
ISX	1176	7695	39	8834	8	29	0.29	-0.1	0.69	0.092	20.51	13.22	1.81	5	7	0.0489	0.092	0.994
C2CD3	1068	5922	44	6948	10	32	0.44	-0.11	0.88	0.0945	22.73	15.23	1.73	7	8	0.00901	0.0945	0.999
HLCS	1148	7751	89	8811	16	72	0.5	-0.15	1.05	0.0945	17.98	12.85	1.5	9	18	0.0136	0.0945	0.999
PTS	1308	7600	13	8895	4	9	0.18	-0.04	0.36	0.0946	30.77	14.66	2.58	3	1	0.0266	0.0946	0.999
USP45	1577	7332	23	8886	7	16	0.23	-0.08	0.46	0.0949	30.43	17.67	2.03	4	3	0.0618	0.0949	0.999
CCBE1	1373	7534	43	8865	10	32	0.34	-0.09	0.69	0.0949	23.26	15.38	1.71	6	4	0.0016	0.0949	0.999
KCNH6	1743	7107	178	8675	42	133	0.5	-0.25	1.25	0.0951	23.6	19.61	1.29	26	38	1.46e-05	0.0951	0.999
STAT5A	1174	6682	16	7840	5	11	0.3	-0.05	0.5	0.0951	31.25	14.91	2.59	5	1	0.000164	0.0951	0.999
CASP5	1844	6868	12	8700	5	7	0.14	-0.03	0.34	0.0971	41.67	21.14	2.66	2	0	0.0495	0.0971	1
TMPRSS6	1767	7134	42	8860	12	29	0.28	-0.11	0.6	0.0975	28.57	19.81	1.67	7	7	0.0243	0.0975	1
AMICA1	1664	6914	40	8540	11	27	0.3	-0.11	0.6	0.0982	27.5	19.36	1.69	6	4	0.0066	0.0982	1
HKDC1	1727	7182	98	8813	24	72	0.43	-0.18	0.9	0.0991	24.49	19.32	1.39	15	11	6.07e-07	0.0991	1
DNAJC16	1797	5669	14	7452	6	8	0.22	-0.07	0.4	0.0996	42.86	24.03	2.37	4	2	0.0991	0.0996	1
ASPA	3158	5740	69	8829	30	39	0.29	-0.12	0.66	0.0996	43.48	35.43	1.4	19	4	3.42e-11	0.0996	1
GRM6	1701	7205	72	8836	18	52	0.36	-0.15	0.8	0.102	25	19.05	1.47	9	15	0.0728	0.102	1
SLC10A2	998	7765	30	8733	6	24	0.34	-0.11	0.68	0.102	20	11.36	1.95	5	4	0.00287	0.102	1
CHD6	899	7003	102	7800	16	86	0.63	-0.25	1.32	0.103	15.69	11.32	1.45	9	12	0.000211	0.103	1
FOXK2	914	7672	59	8528	12	46	0.73	0.12	1.22	0.0163	20.34	10.58	2.19	6	12	0.103	0.103	1
TKT	1778	7085	37	8826	11	26	0.28	-0.11	0.56	0.104	29.73	20.02	1.69	4	3	0.0592	0.104	1
CAMKK1	3000	5892	5	8887	4	1	0.1	0	0.2	0.0405	80	33.71	7.86	3	0	0.104	0.104	1
C9orf43	1742	7038	10	8771	4	5	0.14	0	0.29	0.0846	40	19.82	3.23	3	1	0.104	0.104	1
KIF14	1220	7675	36	8859	8	28	0.28	-0.09	0.66	0.105	22.22	13.68	1.8	7	6	0.000662	0.105	1
LRBA	1397	7512	42	8867	10	32	0.34	-0.13	0.68	0.105	23.81	15.64	1.68	5	5	0.0245	0.105	1
TXK	1104	7805	21	8888	5	16	0.31	-0.1	0.52	0.106	23.81	12.36	2.21	3	1	0.0112	0.106	1
RPE65	1098	7649	53	8695	10	42	0.42	-0.16	0.83	0.106	18.87	12.51	1.66	5	5	0.00809	0.106	1
HINT2	971	3803	13	4761	5	8	0.26	-0.13	0.65	0.107	38.46	20.29	2.45	5	2	0.00763	0.107	1
ALOX15B	3101	5630	68	8665	29	37	0.25	-0.13	0.63	0.108	42.65	35.45	1.42	18	14	0.0125	0.108	1
PROP1	940	7951	22	8870	9	12	0.83	0.48	1.07	0.000164	40.91	10.5	6.34	4	2	0.108	0.108	1
HELLS	909	5406	46	6271	18	26	1.54	0.9	2.06	2.2e-05	39.13	14.21	4.12	9	8	0.109	0.109	1
VPS13B	1186	7676	78	8787	14	61	0.39	-0.19	0.92	0.109	17.95	13.34	1.49	9	13	0.0015	0.109	1
ABLIM1	1305	7372	12	8665	4	8	0.18	-0.09	0.36	0.109	33.33	15.01	2.82	2	0	0.0276	0.109	1
FOXA3	1217	7174	15	8376	5	10	0.29	0	0.48	0.0581	33.33	14.47	2.95	5	5	0.109	0.109	1
ENO3	2970	5733	42	8661	19	23	0.2	-0.1	0.51	0.11	45.24	34.07	1.59	9	5	0.0241	0.11	1
THAP3	1270	7554	26	8798	9	17	0.46	0.14	0.74	0.00964	34.62	14.33	3.15	4	3	0.111	0.111	1
ZNFX1	1226	7498	36	8689	8	27	0.28	-0.09	0.66	0.111	22.22	14.02	1.81	3	3	0.0919	0.111	1
CES5A	1552	7349	48	8855	12	34	0.31	-0.12	0.66	0.111	25	17.39	1.67	7	5	0.00168	0.111	1
KRT33B	1092	7314	43	8363	9	34	0.32	-0.16	0.74	0.111	20.93	12.95	1.77	5	6	0.0243	0.111	1
ALOX15	2548	6345	42	8852	16	25	0.22	-0.11	0.52	0.112	38.1	28.6	1.59	9	4	0.000883	0.112	1
CRB2	1096	7805	19	8882	6	13	0.42	0.05	0.62	0.0238	31.58	12.27	3.29	3	2	0.113	0.113	1
BCO2	1723	7185	69	8839	18	51	0.36	-0.14	0.76	0.113	26.09	19.29	1.47	8	7	0.00318	0.113	1
DNTT	947	7962	20	8889	7	13	0.59	0.24	0.83	0.0032	35	10.57	4.53	4	3	0.114	0.114	1
ATRIP	1719	5263	12	6970	7	5	0.31	0.08	0.54	0.0134	58.33	24.56	4.29	4	1	0.114	0.114	1
KLHL3	1100	7458	9	8549	5	4	0.42	0.16	0.52	0.0031	55.56	12.81	8.47	2	0	0.114	0.114	1
SERPINB4	1629	7278	39	8868	11	28	0.3	-0.11	0.6	0.114	28.21	18.25	1.76	6	4	0.00552	0.114	1
SIPA1L1	944	7856	48	8753	12	35	0.83	0.3	1.25	0.00373	25	10.65	2.85	5	7	0.114	0.114	1
FAN1	901	6914	77	7741	12	62	0.5	-0.25	1.07	0.114	15.58	11.48	1.49	5	10	0.0512	0.114	1
RNF10	1170	7738	45	8863	9	36	0.3	-0.15	0.69	0.115	20	13.1	1.65	7	5	0.000127	0.115	1
TRPM4	1320	6702	57	7966	13	43	0.36	-0.18	0.82	0.115	22.81	16.41	1.53	7	5	0.000731	0.115	1
COL19A1	1974	6936	110	8800	30	80	0.39	-0.2	0.91	0.115	27.27	22.09	1.32	11	17	0.0541	0.115	1
ISYNA1	911	7739	18	8632	4	14	0.25	-0.12	0.49	0.116	22.22	10.51	2.43	2	1	0.0815	0.116	1
PGM2	940	7568	47	8462	8	38	0.36	-0.18	0.84	0.116	17.02	11.01	1.69	2	2	0.11	0.116	1
ADCY7	1163	7732	45	8851	9	35	0.3	-0.15	0.69	0.116	20	13.04	1.71	5	2	0.000302	0.116	1
ATP8B1	1195	7712	31	8876	7	24	0.29	-0.1	0.58	0.116	22.58	13.38	1.88	4	0	1.05e-05	0.116	1
SERPINB8	1486	7295	73	8708	19	54	0.57	0	1.01	0.0311	26.03	16.85	1.73	6	9	0.117	0.117	1
GRB7	1456	7452	12	8897	5	6	0.25	0	0.41	0.0301	41.67	16.31	4.27	3	1	0.117	0.117	1
ATP9B	1475	7432	74	8834	19	54	0.57	0.04	1.06	0.024	25.68	16.48	1.77	6	9	0.117	0.117	1
MYH11	1537	7347	164	8722	34	128	0.47	-0.28	1.22	0.117	20.73	17.23	1.27	13	25	0.0129	0.117	1
COL3A1	1177	7734	51	8861	10	40	0.29	-0.15	0.78	0.117	19.61	13.17	1.64	4	5	0.0489	0.117	1
TACR2	1367	7508	8	8867	3	5	0.17	-0.04	0.26	0.118	37.5	15.38	3.3	2	0	0.0372	0.118	1
ATE1	1094	7809	5	8898	2	3	0.21	0	0.21	0.118	40	12.27	4.76	2	0	0.043	0.118	1
MYH9	1180	7708	80	8809	14	65	0.39	-0.2	0.93	0.118	17.5	13.24	1.41	7	13	0.0204	0.118	1
SUCLA2	939	7586	26	8499	5	21	0.24	-0.12	0.6	0.118	19.23	10.99	1.92	4	6	0.0669	0.118	1
TBC1D9B	1351	6671	24	7998	7	17	0.27	-0.09	0.53	0.0902	29.17	16.8	2.03	5	6	0.119	0.119	1
PLA2R1	1225	7571	20	8776	5	15	0.19	-0.09	0.47	0.12	25	13.9	2.06	3	2	0.0527	0.12	1
COL4A1	2849	6059	133	8776	58	74	0.83	0.28	1.37	0.00232	43.61	31.8	1.67	24	24	0.121	0.121	1
C21orf33	910	7995	18	8887	4	14	0.24	-0.12	0.49	0.121	22.22	10.19	2.51	3	3	0.0867	0.121	1
PEX11G	1924	6955	7	8872	4	3	0.2	0	0.27	0.0415	57.14	21.64	4.82	2	0	0.121	0.121	1
PRKCSH	968	7918	18	8868	4	14	0.23	-0.12	0.46	0.121	22.22	10.87	2.34	2	0	0.0104	0.121	1
SLC29A1	1319	7366	18	8667	5	13	0.18	-0.09	0.45	0.121	27.78	15.16	2.15	3	1	0.0192	0.121	1
ATP12A	1707	7028	98	8637	24	74	0.36	-0.18	0.91	0.122	24.49	19.49	1.34	9	15	0.0562	0.122	1
TMPRSS3	1674	7147	61	8763	15	43	0.29	-0.15	0.7	0.122	24.59	18.93	1.49	5	7	0.122	0.122	1
VNN1	1006	6598	37	7567	8	29	0.34	-0.17	0.74	0.122	21.62	13.19	1.81	6	6	0.00471	0.122	1
IRAK2	1734	7165	32	8867	9	23	0.21	-0.11	0.5	0.123	28.12	19.45	1.62	3	2	0.0775	0.123	1
CREB3	2162	6746	54	8855	17	36	0.24	-0.12	0.61	0.123	31.48	24.22	1.47	9	8	0.0111	0.123	1
SHPK	2185	6723	18	8890	8	10	0.24	0	0.42	0.0445	44.44	24.49	2.46	4	2	0.126	0.126	1
STK10	1726	7181	7	8900	3	4	0.14	-0.04	0.22	0.128	42.86	19.36	3.12	3	1	0.0837	0.128	1
CP	1527	7380	142	8768	29	110	0.47	-0.28	1.07	0.129	20.42	17.08	1.27	12	31	0.115	0.129	1
CPT1B	1294	7314	77	8533	15	60	0.36	-0.23	0.86	0.129	19.48	14.99	1.41	14	10	1.69e-09	0.129	1
EXTL1	1609	7225	58	8777	14	43	0.3	-0.15	0.68	0.129	24.14	18.17	1.46	9	15	0.044	0.129	1
TRIM16	1473	6245	7	7711	3	4	0.17	-0.04	0.25	0.13	42.86	19.06	3.18	2	0	0.0523	0.13	1
ZNF280A	953	7275	6	8222	2	4	0.24	0	0.24	0.131	33.33	11.57	3.82	2	0	0.028	0.131	1
FXYD5	1271	7572	4	8839	2	2	0.09	0	0.18	0.132	50	14.36	5.96	2	0	0.0741	0.132	1
PRKD2	1010	7889	11	8888	3	8	0.22	-0.06	0.34	0.0981	27.27	11.33	2.93	2	1	0.132	0.132	1
MAP3K5	1092	6597	6	7684	3	2	0.21	0.05	0.32	0.0207	50	14.17	9.06	2	0	0.132	0.132	1
CPXM2	1679	7230	56	8853	15	41	0.37	-0.11	0.73	0.0923	26.79	18.8	1.58	6	9	0.132	0.132	1
PRDM2	1498	7308	5	8801	3	2	0.16	0	0.24	0.0406	60	16.99	7.32	2	0	0.132	0.132	1
NLRP8	1702	7057	81	8678	20	61	0.36	-0.18	0.8	0.132	24.69	19.38	1.36	11	14	0.00371	0.132	1
TREX1	1512	5307	27	6792	9	18	0.25	-0.13	0.59	0.133	33.33	22.13	1.75	4	2	0.0326	0.133	1
EPB41L2	1030	5247	59	6220	13	44	0.46	-0.23	1.05	0.133	22.03	16.35	1.51	6	5	0.00416	0.133	1
OPA1	1286	7423	59	8650	13	46	0.36	-0.14	0.82	0.0829	22.03	14.72	1.63	5	9	0.134	0.134	1
FYCO1	2113	6784	15	8882	6	9	0.12	-0.06	0.31	0.134	40	23.72	2.14	4	1	0.0121	0.134	1
TUB	943	7956	52	8849	8	42	0.36	-0.18	0.77	0.134	15.38	10.57	1.61	6	12	0.0216	0.134	1
GSR	1167	7434	20	8581	5	15	0.2	-0.1	0.5	0.134	25	13.54	2.12	3	3	0.123	0.134	1
UMPS	1452	7216	12	8656	4	8	0.17	-0.08	0.33	0.119	33.33	16.73	2.48	3	2	0.135	0.135	1
RET	1122	7763	85	8803	14	68	0.41	-0.26	0.92	0.135	16.47	12.59	1.42	7	15	0.0332	0.135	1
PCSK9	970	7926	19	8877	5	14	0.35	0	0.58	0.0517	26.32	10.87	2.92	4	5	0.136	0.136	1
SLC6A2	1246	7499	31	8714	7	24	0.28	-0.14	0.56	0.136	22.58	14.22	1.76	4	4	0.0397	0.136	1
LAMA5	1372	7491	50	8813	11	39	0.26	-0.17	0.69	0.136	22	15.44	1.54	8	11	0.00716	0.136	1
SHBG	3039	5868	29	8878	13	16	0.15	-0.1	0.4	0.136	44.83	34.08	1.57	7	2	0.00196	0.136	1
ALDOC	1488	6858	33	8313	11	22	0.41	0.04	0.74	0.0238	33.33	17.77	2.3	5	5	0.136	0.136	1
CTNS	2466	6442	72	8836	24	48	0.28	-0.17	0.64	0.137	33.33	27.64	1.31	13	7	2.11e-05	0.137	1
RFT1	890	6771	30	7631	6	24	0.38	-0.19	0.7	0.138	20	11.58	1.9	3	3	0.062	0.138	1
DNAI2	2154	6747	30	8872	10	19	0.18	-0.09	0.43	0.139	33.33	24.17	1.65	5	3	0.0298	0.139	1
DALRD3	1069	7504	14	8559	4	10	0.21	-0.05	0.43	0.0938	28.57	12.44	2.81	2	1	0.14	0.14	1
ADAMTS13	1859	6922	21	8760	7	14	0.2	-0.1	0.41	0.141	33.33	21.14	1.86	4	3	0.092	0.141	1
CDH3	1810	6970	19	8762	6	12	0.14	-0.07	0.35	0.141	31.58	20.59	1.93	3	2	0.135	0.141	1
OAT	1269	7390	33	8629	7	23	0.28	-0.14	0.55	0.141	21.21	14.63	1.77	7	4	5.45e-05	0.141	1
CLDN9	906	7738	28	8616	6	22	0.37	-0.06	0.74	0.075	21.43	10.45	2.33	3	4	0.141	0.141	1
CDX1	1569	7340	15	8894	5	10	0.15	-0.08	0.39	0.142	33.33	17.58	2.34	4	1	0.00412	0.142	1
HBE1	1230	7651	15	8866	4	11	0.19	-0.09	0.38	0.143	26.67	13.83	2.26	2	1	0.121	0.143	1
GRXCR2	998	7713	6	8705	2	4	0.11	-0.06	0.23	0.143	33.33	11.44	3.86	2	0	0.028	0.143	1
FN1	2175	6735	15	8895	6	9	0.12	-0.06	0.3	0.143	40	24.38	2.06	2	0	0.0444	0.143	1
ALKBH3	1096	7813	19	8890	5	14	0.31	-0.05	0.52	0.0755	26.32	12.27	2.55	3	3	0.144	0.144	1
ABCB6	1121	7784	70	8836	13	56	0.41	-0.15	0.92	0.0865	18.57	12.54	1.61	4	8	0.144	0.144	1
RFX6	1489	6898	4	8383	2	2	0.08	0	0.16	0.145	50	17.74	4.63	2	0	0.0741	0.145	1
FRK	960	7247	18	8190	4	13	0.24	-0.12	0.47	0.145	22.22	11.67	2.32	3	3	0.104	0.145	1
GLOD4	1577	5257	6	6828	3	3	0.16	-0.04	0.25	0.145	50	23.05	3.33	3	0	0.00708	0.145	1
NAV2	2329	6580	31	8879	11	19	0.17	-0.12	0.44	0.145	35.48	26.11	1.64	5	2	0.0113	0.145	1
CECR1	1596	7157	30	8724	8	21	0.23	-0.11	0.5	0.145	26.67	18.2	1.71	6	4	0.00346	0.145	1
TALDO1	1176	6860	26	8010	6	20	0.2	-0.15	0.5	0.146	23.08	14.61	1.75	6	2	1.79e-05	0.146	1
ATAD3A	875	5347	32	6191	7	24	0.4	-0.2	0.8	0.146	21.88	14.02	1.78	4	5	0.0765	0.146	1
EXTL3	942	6500	83	7360	14	68	0.49	-0.3	1.09	0.146	16.87	12.61	1.42	11	10	7.59e-07	0.146	1
NDST3	1127	7685	11	8802	3	7	0.2	-0.1	0.31	0.146	27.27	12.77	2.92	2	0	0.0215	0.146	1
CDH1	1022	6874	28	7868	6	22	0.22	-0.17	0.62	0.147	21.43	12.91	1.83	4	1	0.000539	0.147	1
PSEN2	884	7538	63	8359	10	53	0.38	-0.25	0.95	0.138	15.87	10.46	1.61	5	14	0.147	0.147	1
LAMA1	2899	6009	100	8809	40	59	0.41	-0.08	0.84	0.0606	40	32.46	1.41	11	11	0.148	0.148	1
CTRB2	986	7718	6	8698	2	4	0.11	-0.06	0.23	0.149	33.33	11.31	3.91	2	0	0.028	0.149	1
GNAT1	998	7086	18	8066	4	14	0.23	-0.11	0.46	0.149	22.22	12.32	2.03	3	2	0.0355	0.149	1
LMO7	2327	6581	33	8875	12	21	0.17	-0.12	0.47	0.15	36.36	26.08	1.62	5	4	0.107	0.15	1
PYGB	1440	7463	131	8775	25	103	0.41	-0.29	1.04	0.15	19.08	16.13	1.26	9	20	0.0547	0.15	1
INHBE	1037	7870	12	8895	3	9	0.22	-0.11	0.33	0.15	25	11.62	2.53	3	1	0.012	0.15	1
POMT1	1063	7843	72	8836	12	58	0.32	-0.27	0.85	0.15	16.67	11.89	1.53	9	7	3.82e-06	0.15	1
SH3BGR	945	7953	13	8885	3	10	0.24	-0.12	0.36	0.151	23.08	10.6	2.52	2	1	0.0923	0.151	1
STK31	1322	7583	30	8875	7	23	0.27	-0.13	0.53	0.152	23.33	14.82	1.75	4	3	0.0194	0.152	1
TP53	3306	5608	75	8839	33	42	0.24	-0.17	0.6	0.153	44	37.03	1.33	24	4	1.36e-16	0.153	1
SDK1	1608	7297	36	8871	9	25	0.23	-0.15	0.53	0.154	25	18.03	1.63	4	2	0.0112	0.154	1
POLI	1049	7078	11	8116	3	8	0.22	-0.11	0.33	0.155	27.27	12.89	2.53	2	0	0.0172	0.155	1
FCN2	1507	7085	35	8557	11	24	0.4	0.04	0.72	0.0295	31.43	17.48	2.15	4	4	0.155	0.155	1
DNASE1	1216	7680	27	8870	6	20	0.19	-0.14	0.48	0.155	22.22	13.64	1.89	4	0	1.06e-05	0.155	1
VPREB3	959	7823	3	8779	2	1	0.23	0	0.23	0.0482	66.67	10.9	16.31	2	0	0.156	0.156	1
SRM	1354	7398	3	8749	2	1	0.17	0	0.17	0.0563	66.67	15.45	10.93	2	0	0.156	0.156	1
NALCN	2478	6424	97	8805	32	65	0.28	-0.2	0.75	0.156	32.99	27.78	1.28	13	12	0.00509	0.156	1
CPN2	1593	7090	3	8680	2	1	0.15	0	0.15	0.0793	66.67	18.33	8.9	2	0	0.156	0.156	1
LZTR1	2168	6736	34	8871	11	22	0.18	-0.12	0.46	0.156	32.35	24.32	1.55	7	7	0.0595	0.156	1
KRT32	1768	7140	62	8846	16	46	0.28	-0.18	0.67	0.156	25.81	19.81	1.4	8	9	0.0117	0.156	1
LIMK2	1184	7279	46	8417	9	37	0.29	-0.2	0.69	0.156	19.57	13.96	1.5	5	11	0.155	0.156	1
C1orf189	1086	6634	3	7717	2	1	0.21	0	0.21	0.0438	66.67	14.05	12.22	2	0	0.156	0.156	1
FHIT	1173	6973	15	8131	4	11	0.2	-0.1	0.4	0.157	26.67	14.38	2.16	2	0	0.016	0.157	1
SH3TC2	925	7953	52	8827	8	43	0.36	-0.24	0.78	0.158	15.38	10.39	1.6	4	3	0.00364	0.158	1
NDOR1	1676	7171	33	8814	9	24	0.22	-0.15	0.52	0.159	27.27	18.91	1.6	5	2	0.00163	0.159	1
LAIR1	1309	7347	5	8651	2	3	0.09	-0.05	0.18	0.161	40	15.11	3.74	2	0	0.043	0.161	1
LPL	1263	4445	28	5680	9	19	0.31	-0.2	0.71	0.161	32.14	22.08	1.67	3	2	0.12	0.161	1
GTF2H5	959	7325	10	8274	3	7	0.24	-0.06	0.35	0.0986	30	11.55	3.27	2	1	0.162	0.162	1
NDST1	985	7274	10	8249	3	7	0.23	-0.06	0.35	0.105	30	11.9	3.16	2	1	0.162	0.162	1
ZNF79	1910	6664	8	8566	4	4	0.13	0	0.27	0.0767	50	22.25	3.49	3	1	0.163	0.163	1
KLHL17	1242	7506	14	8734	4	10	0.19	-0.09	0.38	0.164	28.57	14.17	2.42	4	2	0.0109	0.164	1
PDE4C	1525	7072	31	8566	8	23	0.24	-0.16	0.48	0.164	25.81	17.71	1.61	3	1	0.0154	0.164	1
CHRNA5	1087	7016	54	8050	10	43	0.32	-0.27	0.8	0.164	18.52	13.38	1.5	5	11	0.134	0.164	1
GBP6	906	7912	29	8789	5	24	0.25	-0.18	0.62	0.164	17.24	10.25	1.82	4	3	0.00455	0.164	1
ARSG	1230	6946	20	8156	5	15	0.19	-0.14	0.48	0.165	25	15.02	1.88	4	4	0.0566	0.165	1
ATP4A	1035	7575	69	8541	12	57	0.44	-0.16	0.93	0.11	17.39	11.98	1.54	5	13	0.165	0.165	1
ABCA10	1491	7415	91	8817	19	70	0.32	-0.28	0.85	0.166	20.88	16.7	1.35	11	13	0.000356	0.166	1
KRT38	1576	7331	33	8875	8	24	0.23	-0.15	0.46	0.166	24.24	17.67	1.55	4	3	0.0269	0.166	1
ETHE1	1423	7483	17	8890	5	11	0.25	-0.08	0.42	0.101	29.41	15.95	2.39	2	1	0.167	0.167	1
CYP4F11	1539	7083	50	8573	12	37	0.24	-0.2	0.63	0.167	24	17.81	1.49	5	7	0.0946	0.167	1
IGF1R	1443	7465	28	8880	7	21	0.17	-0.17	0.5	0.167	25	16.17	1.72	5	4	0.0115	0.167	1
ZNF551	1020	6702	11	7711	3	8	0.23	-0.11	0.34	0.168	27.27	13.19	2.46	2	0	0.0172	0.168	1
IL12RB1	979	6053	34	6998	7	27	0.36	-0.24	0.71	0.168	20.59	13.89	1.6	3	4	0.124	0.168	1
BFSP1	918	7677	29	8568	5	22	0.24	-0.18	0.61	0.168	17.24	10.66	1.9	2	1	0.0535	0.168	1
ECE2	1394	7512	81	8826	16	64	0.34	-0.26	0.81	0.169	19.75	15.61	1.35	9	17	0.0203	0.169	1
ZNF749	1498	7320	13	8805	4	9	0.16	-0.08	0.32	0.169	30.77	16.97	2.17	2	1	0.165	0.169	1
ANGEL1	1069	6832	16	7885	4	12	0.22	-0.11	0.43	0.171	25	13.51	2.13	2	1	0.105	0.171	1
NEK4	2132	5576	28	7681	10	17	0.19	-0.13	0.45	0.171	35.71	27.63	1.54	5	1	0.00121	0.171	1
BMP1	1524	5797	12	7310	4	7	0.17	-0.08	0.33	0.175	33.33	20.79	2.17	2	0	0.0344	0.175	1
MTHFR	1872	7037	32	8878	9	22	0.2	-0.14	0.47	0.175	28.12	20.98	1.54	7	5	0.00266	0.175	1
SLC6A20	1719	7177	35	8861	10	25	0.22	-0.11	0.54	0.128	28.57	19.29	1.67	3	3	0.176	0.176	1
CTNND2	959	7932	19	8872	4	15	0.23	-0.12	0.47	0.134	21.05	10.76	2.21	2	2	0.176	0.176	1
LECT1	980	7922	19	8883	4	15	0.23	-0.11	0.46	0.14	21.05	10.99	2.16	2	2	0.176	0.176	1
GBP3	1328	7190	25	8493	6	19	0.18	-0.13	0.45	0.176	24	15.57	1.71	3	2	0.0463	0.176	1
DISP1	1195	7713	91	8819	16	73	0.39	-0.29	0.92	0.176	17.58	13.37	1.41	10	13	0.000225	0.176	1
KCNA7	1095	7262	49	8308	9	40	0.32	-0.26	0.74	0.178	18.37	13.07	1.49	6	13	0.0725	0.178	1
AMPD3	1252	7650	53	8852	10	40	0.28	-0.23	0.65	0.179	18.87	14.03	1.53	5	6	0.02	0.179	1
ACP2	1438	7471	5	8904	2	3	0.08	-0.08	0.17	0.179	40	16.13	3.46	2	0	0.043	0.179	1
EVC2	1244	7206	60	8391	12	47	0.28	-0.24	0.75	0.179	20	14.68	1.48	8	14	0.019	0.179	1
ZNF530	1272	7375	15	8632	4	11	0.18	-0.09	0.37	0.179	26.67	14.69	2.11	2	1	0.121	0.179	1
RGL4	1267	7339	11	8595	4	7	0.19	0	0.37	0.0716	36.36	14.69	3.31	3	2	0.18	0.18	1
WWP2	1508	7139	13	8634	4	9	0.16	-0.08	0.32	0.18	30.77	17.42	2.1	4	2	0.0156	0.18	1
SOAT1	1231	7424	11	8644	4	7	0.28	0	0.38	0.0523	36.36	14.19	3.45	3	2	0.18	0.18	1
MMP1	1299	7590	37	8852	8	29	0.27	-0.18	0.54	0.18	21.62	14.58	1.61	6	3	0.000155	0.18	1
SLC25A19	1218	7689	11	8896	4	7	0.29	0	0.38	0.041	36.36	13.65	3.61	3	2	0.18	0.18	1
PLB1	1649	7260	55	8854	17	38	0.52	0.07	0.89	0.0159	30.91	18.43	1.97	6	8	0.181	0.181	1
ACADM	1297	7552	45	8805	9	35	0.27	-0.23	0.63	0.182	20	14.63	1.5	5	5	0.0107	0.182	1
PCDH12	1746	7164	24	8886	7	17	0.14	-0.14	0.43	0.182	29.17	19.57	1.69	2	1	0.139	0.182	1
SARDH	1728	7166	55	8842	15	37	0.36	-0.07	0.72	0.0673	27.27	19.37	1.68	7	11	0.182	0.182	1
OLFML2B	885	8021	46	8860	7	39	0.25	-0.25	0.75	0.183	15.22	9.91	1.63	4	6	0.0281	0.183	1
GNMT	1578	6392	4	7966	2	2	0.08	-0.04	0.16	0.184	50	19.78	4.05	2	0	0.0741	0.184	1
PPWD1	1368	7534	27	8875	9	18	0.43	0.09	0.69	0.0122	33.33	15.31	2.75	2	1	0.184	0.184	1
CPT2	1221	7054	83	8195	16	64	0.38	-0.24	0.91	0.151	19.28	14.7	1.44	7	18	0.184	0.184	1
CELA2A	1827	7079	45	8861	12	33	0.21	-0.17	0.55	0.186	26.67	20.48	1.41	9	9	0.00235	0.186	1
ALDH3A2	1641	6583	32	8192	12	20	0.46	0.08	0.76	0.0135	37.5	19.89	2.41	6	6	0.186	0.186	1
MLC1	1658	7246	42	8862	12	30	0.3	-0.07	0.63	0.0886	28.57	18.57	1.75	4	5	0.187	0.187	1
SLC47A2	2682	5801	15	8468	7	8	0.11	-0.08	0.3	0.188	46.67	31.59	1.89	3	1	0.135	0.188	1
SDHD	1012	5770	14	6768	4	10	0.23	-0.12	0.46	0.169	28.57	14.89	2.28	3	3	0.188	0.188	1
SCN1A	985	7236	90	8131	20	70	1.04	0.35	1.73	0.00427	22.22	11.87	2.1	5	10	0.189	0.189	1
MTMR6	1073	7695	60	8708	10	50	0.32	-0.27	0.74	0.189	16.67	12.21	1.43	4	5	0.0239	0.189	1
LAMB1	1322	7420	36	8706	8	28	0.18	-0.18	0.53	0.189	22.22	15.09	1.6	5	2	0.000446	0.189	1
F7	1927	6979	18	8888	6	12	0.13	-0.1	0.33	0.172	33.33	21.61	1.81	2	1	0.189	0.189	1
AGXT	1029	7183	32	8180	6	26	0.22	-0.22	0.56	0.19	18.75	12.51	1.61	4	5	0.0355	0.19	1
AKR1C3	1264	7422	21	8665	6	15	0.28	-0.05	0.56	0.0733	28.57	14.52	2.35	4	5	0.19	0.19	1
CHI3L1	1309	7596	17	8889	4	12	0.18	-0.09	0.36	0.191	23.53	14.68	1.93	3	3	0.125	0.191	1
ANO10	886	7053	25	7915	7	17	0.51	0.13	0.89	0.0182	28	11.11	3.28	3	3	0.191	0.191	1
CD109	1649	7246	24	8871	7	17	0.22	-0.11	0.45	0.137	29.17	18.51	1.81	3	3	0.191	0.191	1
SCO2	1753	7009	26	8738	7	17	0.14	-0.14	0.43	0.173	26.92	19.98	1.65	3	3	0.191	0.191	1
PAK6	1070	7766	48	8788	8	40	0.32	-0.27	0.64	0.192	16.67	12.08	1.45	5	9	0.036	0.192	1
CNTN6	1693	7114	53	8754	13	40	0.22	-0.22	0.58	0.192	24.53	19.19	1.37	7	4	0.000326	0.192	1
COL17A1	2336	6570	139	8770	40	96	0.29	-0.32	0.84	0.194	28.78	26.18	1.17	19	10	1.02e-08	0.194	1
POMGNT1	917	7930	32	8817	5	25	0.24	-0.24	0.61	0.194	15.62	10.34	1.73	3	2	0.0142	0.194	1
TRDMT1	1327	7562	29	8860	7	22	0.27	-0.09	0.53	0.12	24.14	14.9	1.81	3	4	0.194	0.194	1
TYK2	1689	7210	22	8878	6	15	0.15	-0.15	0.37	0.195	27.27	18.96	1.71	4	5	0.19	0.195	1
GNAO1	1082	7531	12	8601	4	8	0.32	0	0.42	0.0574	33.33	12.53	3.48	2	1	0.196	0.196	1
PRPF31	1726	7180	7	8900	4	2	0.22	0.07	0.29	0.0153	57.14	19.35	8.32	2	0	0.196	0.196	1
BEST4	1402	5551	20	6933	6	14	0.18	-0.18	0.45	0.196	30	20.14	1.7	4	2	0.0176	0.196	1
LAMA4	2227	6683	40	8870	13	27	0.18	-0.18	0.48	0.196	32.5	24.96	1.44	7	8	0.0985	0.196	1
COL6A1	1423	7435	57	8803	13	42	0.33	-0.13	0.75	0.0963	22.81	16.02	1.62	6	12	0.197	0.197	1
MFGE8	1202	6917	80	8040	15	64	0.39	-0.29	0.88	0.172	18.75	14.76	1.35	4	9	0.197	0.197	1
C11orf42	1515	7393	5	8903	2	3	0.08	-0.08	0.16	0.197	40	16.99	3.25	2	0	0.043	0.197	1
MDN1	2628	6282	12	8899	5	6	0.11	-0.05	0.24	0.198	41.67	29.48	1.99	2	0	0.0631	0.198	1
SERAC1	1376	7524	27	8874	6	20	0.17	-0.17	0.43	0.198	22.22	15.44	1.64	3	0	0.00044	0.198	1
NID2	1642	7267	31	8878	9	22	0.22	-0.11	0.52	0.112	29.03	18.39	1.81	4	5	0.199	0.199	1
ABCA9	1266	7639	155	8753	25	127	0.37	-0.41	1.1	0.199	16.13	14.18	1.19	21	29	7.84e-10	0.199	1
HINT3	976	7329	7	8298	2	5	0.12	-0.12	0.23	0.2	28.57	11.74	3	2	1	0.156	0.2	1
RP1	960	7102	45	8018	8	36	0.35	-0.24	0.77	0.148	17.78	11.87	1.64	3	6	0.2	0.2	1
ANKRD42	963	7143	26	8080	5	21	0.24	-0.24	0.59	0.2	19.23	11.86	1.77	3	3	0.0552	0.2	1
APTX	1319	5743	35	7027	9	26	0.28	-0.23	0.61	0.2	25.71	18.64	1.51	6	5	0.007	0.2	1
CERCAM	1089	7715	24	8780	7	17	0.42	0.05	0.73	0.0285	29.17	12.32	2.92	5	7	0.201	0.201	1
ERCC6	1188	7636	99	8726	16	82	0.29	-0.34	0.92	0.202	16.16	13.43	1.25	9	17	0.00378	0.202	1
CDC42BPB	1169	7533	24	8678	5	19	0.2	-0.2	0.49	0.202	20.83	13.41	1.7	4	2	0.00297	0.202	1
SCN11A	1688	7221	154	8757	33	119	0.37	-0.4	0.99	0.203	21.43	18.9	1.19	15	30	0.0136	0.203	1
MMP21	1209	7324	9	8524	3	6	0.19	-0.1	0.29	0.132	33.33	14.15	3.03	2	1	0.203	0.203	1
AHSG	1533	7279	9	8803	3	6	0.16	-0.08	0.24	0.184	33.33	17.38	2.37	2	1	0.203	0.203	1
FGD4	905	6744	9	7640	3	6	0.25	0	0.38	0.0842	33.33	11.81	3.73	2	1	0.203	0.203	1
ADAT1	997	5512	62	6447	12	50	0.36	-0.36	0.95	0.204	19.35	15.28	1.33	9	8	3.71e-05	0.204	1
MARVELD3	1467	7225	15	8677	4	11	0.16	-0.12	0.33	0.205	26.67	16.86	1.79	4	1	0.0011	0.205	1
ALDH1L1	1241	7622	56	8807	13	43	0.47	0	0.94	0.0424	23.21	13.94	1.86	4	7	0.205	0.205	1
ZNF667	1008	7898	7	8899	2	5	0.11	-0.11	0.22	0.205	28.57	11.3	3.13	2	0	0.0197	0.205	1
AEBP1	1173	7732	43	8862	8	35	0.2	-0.25	0.59	0.206	18.6	13.15	1.51	4	7	0.0971	0.206	1
AXIN1	1283	7269	10	8542	3	7	0.18	-0.09	0.28	0.207	30	14.98	2.43	2	1	0.162	0.207	1
PRUNE2	2314	6343	22	8635	8	14	0.12	-0.12	0.35	0.207	36.36	26.71	1.57	4	2	0.048	0.207	1
KLK4	1247	7659	14	8892	4	10	0.19	-0.09	0.37	0.143	28.57	13.98	2.46	1	0	0.208	0.208	1
CBL	1070	6459	20	7509	7	13	0.44	0.11	0.76	0.0179	35	14.16	3.25	2	1	0.208	0.208	1
GBA	1367	7518	54	8831	11	43	0.26	-0.26	0.65	0.208	20.37	15.35	1.41	3	5	0.182	0.208	1
ATP1A4	1998	6911	144	8767	36	106	0.32	-0.35	0.87	0.209	25	22.38	1.17	15	26	0.0251	0.209	1
GPRC5C	1171	7587	28	8730	6	22	0.2	-0.2	0.49	0.209	21.43	13.34	1.77	4	3	0.0127	0.209	1
MERTK	1204	6550	20	7734	6	14	0.29	-0.1	0.54	0.0959	30	15.49	2.33	3	3	0.21	0.21	1
SEMA3G	1647	7258	18	8887	5	13	0.15	-0.15	0.34	0.21	27.78	18.48	1.69	2	0	0.0174	0.21	1
ZNF677	1197	7525	12	8710	3	9	0.19	-0.1	0.29	0.212	25	13.71	2.1	2	1	0.11	0.212	1
C10orf2	1892	6728	56	8565	15	40	0.2	-0.24	0.58	0.212	26.79	21.91	1.33	7	4	0.000891	0.212	1
DUOXA2	1656	7252	16	8892	5	11	0.15	-0.11	0.33	0.213	31.25	18.57	1.99	2	1	0.167	0.213	1
CUL7	1044	7836	50	8831	9	40	0.22	-0.27	0.71	0.213	18	11.72	1.69	5	9	0.0586	0.213	1
HFE	1907	7002	16	8893	5	11	0.13	-0.1	0.3	0.213	31.25	21.39	1.67	3	2	0.109	0.213	1
KDM4C	2229	6478	14	8694	5	8	0.12	-0.09	0.27	0.213	35.71	25.58	1.82	2	0	0.0399	0.213	1
VAV2	2161	6745	35	8871	11	24	0.18	-0.15	0.43	0.214	31.43	24.24	1.43	7	1	1.69e-06	0.214	1
PTPRG	979	7930	23	8886	4	19	0.23	-0.17	0.46	0.214	17.39	10.97	1.71	3	4	0.0789	0.214	1
BTN2A1	1674	7160	23	8812	6	16	0.15	-0.15	0.37	0.214	26.09	18.93	1.6	3	2	0.0702	0.214	1
HNF1B	1188	7708	52	8845	9	42	0.19	-0.24	0.63	0.215	17.31	13.33	1.39	6	6	0.00144	0.215	1
CASQ2	1266	7639	17	8888	4	13	0.18	-0.14	0.37	0.215	23.53	14.2	1.86	4	3	0.0156	0.215	1
WFS1	1169	7330	122	8378	20	101	0.4	-0.45	1.04	0.215	16.39	13.71	1.24	15	14	4.51e-09	0.215	1
ABCG2	912	7973	76	8809	12	64	0.49	-0.18	1.1	0.0869	15.79	10.22	1.64	5	16	0.216	0.216	1
CYP11B2	932	7968	7	8894	2	4	0.24	0	0.24	0.131	28.57	10.46	4.27	2	1	0.216	0.216	1
DSC3	1456	7436	55	8839	17	36	0.74	0.25	1.07	0.00302	30.91	16.28	2.41	6	8	0.216	0.216	1
TERT	1035	7806	28	8814	5	22	0.22	-0.22	0.55	0.216	17.86	11.69	1.71	2	1	0.0535	0.216	1
IFNAR2	895	7999	6	8888	2	4	0.25	0	0.25	0.119	33.33	10.05	4.47	2	1	0.216	0.216	1
REEP4	1529	6060	13	7576	5	8	0.25	-0.04	0.41	0.0819	38.46	20.12	2.48	3	2	0.216	0.216	1
NDUFA8	1115	6499	18	7597	4	13	0.21	-0.16	0.42	0.217	22.22	14.62	1.79	4	3	0.0156	0.217	1
AP4M1	1783	7119	38	8864	10	28	0.14	-0.18	0.49	0.217	26.32	20	1.43	4	4	0.0771	0.217	1
DPH2	1204	7705	18	8891	4	14	0.19	-0.14	0.38	0.218	22.22	13.5	1.83	3	1	0.00856	0.218	1
EPHA8	1003	5532	15	6520	4	11	0.24	-0.18	0.47	0.218	26.67	15.32	2.01	4	1	0.0011	0.218	1
L2HGDH	1217	7243	22	8438	5	17	0.19	-0.19	0.43	0.218	22.73	14.36	1.75	3	2	0.0386	0.218	1
CACNB1	1011	7686	28	8669	5	23	0.22	-0.22	0.56	0.22	17.86	11.6	1.65	3	4	0.0841	0.22	1
TLR1	1241	5109	31	6319	8	23	0.2	-0.25	0.6	0.22	25.81	19.51	1.43	2	0	0.0142	0.22	1
SHMT1	2605	5646	8	8243	4	4	0.11	-0.06	0.22	0.22	50	31.55	2.17	2	0	0.0815	0.22	1
CAPSL	1147	7702	25	8824	5	20	0.2	-0.2	0.5	0.22	20	12.94	1.68	2	2	0.154	0.22	1
PDE5A	1074	7688	28	8734	6	22	0.32	-0.11	0.58	0.128	21.43	12.23	1.95	3	5	0.221	0.221	1
FLT1	1120	7785	29	8877	6	22	0.31	-0.15	0.56	0.136	20.69	12.55	1.9	3	5	0.221	0.221	1
NEK10	1379	5914	5	7288	2	3	0.09	-0.09	0.18	0.221	40	18.89	2.86	2	0	0.043	0.221	1
TOR2A	1439	7386	11	8815	3	7	0.08	-0.08	0.25	0.221	27.27	16.29	2.2	2	0	0.0215	0.221	1
GUCY2D	2498	5281	33	7746	13	20	0.18	-0.18	0.44	0.222	39.39	32.08	1.37	7	5	0.0484	0.222	1
SMPD1	1055	6178	48	7186	9	38	0.22	-0.28	0.72	0.223	18.75	14.56	1.39	4	9	0.209	0.223	1
COL2A1	1419	7427	89	8759	17	70	0.25	-0.34	0.8	0.223	19.1	16.01	1.27	12	17	0.0002	0.223	1
MFSD3	998	7764	14	8748	5	9	0.34	0.06	0.57	0.0232	35.71	11.35	4.32	2	1	0.224	0.224	1
TUBE1	1466	5907	15	7359	5	9	0.17	-0.09	0.43	0.11	33.33	19.85	2.24	2	1	0.224	0.224	1
CYP11B1	1305	6630	16	7920	4	11	0.18	-0.14	0.37	0.224	25	16.43	1.85	2	0	0.016	0.224	1
MICALL1	1469	7437	10	8896	3	7	0.08	-0.08	0.24	0.224	30	16.48	2.17	3	1	0.0227	0.224	1
GNPTG	1105	7761	38	8828	9	29	0.52	0	0.83	0.0307	23.68	12.42	2.18	4	7	0.224	0.224	1
DCLRE1A	984	7449	14	8420	3	10	0.23	-0.12	0.35	0.182	21.43	11.65	2.27	2	2	0.224	0.224	1
TNS1	2234	6670	140	8767	39	98	0.24	-0.33	0.84	0.224	27.86	25.04	1.19	17	10	2.15e-07	0.224	1
TCOF1	1283	6843	24	8103	9	14	0.56	0.19	0.79	0.00527	37.5	15.72	3.43	3	2	0.225	0.225	1
PDZRN3	1581	7242	15	8809	4	10	0.15	-0.12	0.31	0.225	26.67	17.9	1.83	2	1	0.14	0.225	1
CUX1	1441	7245	16	8670	4	12	0.17	-0.12	0.33	0.225	25	16.57	1.68	2	1	0.105	0.225	1
NLRP14	1637	7269	37	8871	9	26	0.22	-0.15	0.52	0.173	24.32	18.35	1.54	3	4	0.225	0.225	1
ACOX2	1310	7599	29	8880	6	23	0.18	-0.18	0.45	0.226	20.69	14.68	1.51	5	4	0.00347	0.226	1
CD14	1170	7724	19	8875	4	15	0.2	-0.15	0.39	0.226	21.05	13.14	1.76	2	2	0.176	0.226	1
PLEKHA6	1360	6880	10	8230	3	7	0.09	-0.09	0.26	0.226	30	16.49	2.17	2	0	0.0215	0.226	1
OTOS	924	6413	15	7323	3	11	0.12	-0.12	0.37	0.226	20	12.58	1.89	2	1	0.0789	0.226	1
KRT72	1061	7343	53	8351	9	44	0.22	-0.32	0.7	0.227	16.98	12.6	1.42	4	9	0.141	0.227	1
BBS7	1333	6992	40	8287	8	30	0.18	-0.22	0.54	0.227	20	15.99	1.4	6	4	0.000528	0.227	1
COASY	1781	7127	32	8876	10	22	0.28	-0.07	0.56	0.0859	31.25	19.95	1.82	3	3	0.228	0.228	1
C19orf40	1410	7411	10	8811	3	7	0.17	-0.08	0.25	0.196	30	15.97	2.25	1	0	0.228	0.228	1
C14orf166	1415	7493	10	8898	3	7	0.17	-0.08	0.25	0.197	30	15.87	2.27	1	0	0.228	0.228	1
MFN1	1088	7821	84	8825	13	71	0.31	-0.37	0.84	0.229	15.48	12.18	1.32	8	16	0.0059	0.229	1
LIPI	1030	7870	32	8869	8	23	0.55	0.11	0.82	0.0194	25	11.52	2.66	3	4	0.229	0.229	1
OPTN	936	7970	31	8875	5	26	0.24	-0.24	0.6	0.229	16.13	10.49	1.64	3	2	0.0128	0.229	1
NLRP4	1996	6910	23	8883	8	15	0.19	-0.1	0.39	0.139	34.78	22.38	1.85	4	4	0.229	0.229	1
LRP11	1289	7127	17	8400	4	12	0.18	-0.14	0.37	0.224	23.53	15.3	1.84	3	4	0.229	0.229	1
TPTE2	893	7988	63	8818	9	54	0.25	-0.37	0.81	0.23	14.29	10.02	1.49	5	10	0.0272	0.23	1
OGDHL	1383	7494	88	8790	16	71	0.26	-0.34	0.77	0.232	18.18	15.55	1.22	6	15	0.14	0.232	1
ASAH1	1639	7235	51	8824	18	32	0.67	0.26	1.05	0.00161	35.29	18.37	2.48	8	10	0.233	0.233	1
LRP8	901	7120	68	7953	10	58	0.25	-0.38	0.88	0.234	14.71	11.2	1.36	8	10	9.92e-05	0.234	1
ABCC5	1278	6161	66	7373	14	52	0.28	-0.33	0.8	0.234	21.21	17.14	1.3	10	8	1.54e-05	0.234	1
NPC1L1	1259	7324	169	8417	28	138	0.37	-0.51	1.16	0.235	16.57	14.63	1.18	12	23	0.00163	0.235	1
WDR48	1431	5022	13	6441	5	7	0.27	-0.04	0.45	0.0912	38.46	22.14	2.51	4	3	0.235	0.235	1
FAT2	2684	6225	78	8833	26	50	0.16	-0.24	0.59	0.236	33.33	30.09	1.21	8	7	0.0358	0.236	1
GMPR	930	6247	32	7145	6	26	0.25	-0.25	0.62	0.236	18.75	12.93	1.55	2	3	0.227	0.236	1
ABRA	972	7676	36	8612	11	25	0.81	0.35	1.16	0.00155	30.56	11.16	3.47	4	5	0.237	0.237	1
ZNF132	1695	7194	11	8878	4	7	0.15	-0.07	0.29	0.158	36.36	19.05	2.43	2	1	0.237	0.237	1
CHRNA9	1045	7854	58	8841	9	49	0.22	-0.33	0.7	0.238	15.52	11.72	1.38	5	7	0.00987	0.238	1
MACF1	2121	6789	61	8850	17	43	0.19	-0.25	0.56	0.239	27.87	23.77	1.27	11	6	8.44e-06	0.239	1
RSPH1	1268	7402	23	8647	5	18	0.18	-0.18	0.42	0.24	21.74	14.61	1.62	3	4	0.149	0.24	1
IHH	1044	7437	17	8465	5	11	0.33	0.05	0.55	0.0291	29.41	12.27	3.24	3	3	0.24	0.24	1
FAH	1364	7524	55	8835	10	43	0.17	-0.26	0.61	0.24	18.18	15.33	1.28	4	5	0.039	0.24	1
INADL	2387	6522	29	8880	10	19	0.11	-0.14	0.37	0.24	34.48	26.77	1.44	4	2	0.039	0.24	1
NFX1	1193	7497	7	8683	2	5	0.1	-0.1	0.19	0.241	28.57	13.72	2.51	2	1	0.156	0.241	1
GFAP	1630	6471	31	8071	8	22	0.15	-0.19	0.46	0.241	25.81	20.1	1.44	4	5	0.146	0.241	1
PPOX	1563	6395	20	7938	8	12	0.32	0	0.56	0.0342	40	19.59	2.73	3	2	0.242	0.242	1
FOXN1	1341	7536	46	8831	9	37	0.18	-0.26	0.57	0.243	19.57	15.08	1.37	5	8	0.0511	0.243	1
IFFO1	1832	6701	15	8518	5	10	0.14	-0.1	0.31	0.196	33.33	21.45	1.83	1	0	0.244	0.244	1
FUCA2	1731	6414	15	8130	6	9	0.22	-0.04	0.4	0.0726	40	21.22	2.47	3	2	0.244	0.244	1
KRT76	914	7992	68	8838	9	59	0.24	-0.37	0.79	0.245	13.24	10.24	1.33	4	11	0.107	0.245	1
KIF21B	1381	7079	27	8433	7	20	0.26	-0.13	0.52	0.148	25.93	16.29	1.79	2	2	0.245	0.245	1
PCDHB10	1904	7005	16	8893	5	11	0.13	-0.13	0.3	0.245	31.25	21.35	1.67	3	1	0.0291	0.245	1
FAM20A	1395	6708	22	8081	7	15	0.26	-0.04	0.52	0.0765	31.82	17.18	2.24	3	3	0.246	0.246	1
CLDN20	2067	6842	22	8887	7	15	0.13	-0.13	0.35	0.235	31.82	23.18	1.54	3	3	0.246	0.246	1
CYP2D6	1251	7615	18	8848	4	14	0.19	-0.19	0.37	0.247	22.22	14.09	1.74	2	1	0.0815	0.247	1
GALT	1218	7625	51	8792	9	42	0.19	-0.29	0.62	0.247	17.65	13.75	1.34	5	5	0.00493	0.247	1
ATG7	943	5645	7	6581	2	5	0.12	-0.12	0.25	0.247	28.57	14.3	2.39	2	1	0.156	0.247	1
KLK10	1235	7614	16	8833	4	12	0.19	-0.09	0.38	0.172	25	13.94	2.06	2	2	0.247	0.247	1
ABCG8	1645	7263	39	8870	9	29	0.15	-0.22	0.48	0.247	23.08	18.44	1.37	5	7	0.0781	0.247	1
G6PC3	940	7642	16	8566	4	12	0.24	-0.06	0.48	0.0938	25	10.93	2.71	2	2	0.247	0.247	1
SGCG	1450	7396	36	8810	8	28	0.16	-0.21	0.49	0.247	22.22	16.37	1.46	7	6	0.000662	0.247	1
MUC4	2128	6778	30	8876	9	21	0.12	-0.15	0.37	0.248	30	23.87	1.37	4	4	0.129	0.248	1
KRT2	1536	7372	62	8846	13	49	0.24	-0.28	0.63	0.249	20.97	17.22	1.27	7	7	0.00221	0.249	1
DOK4	1348	7203	31	8520	7	24	0.18	-0.18	0.53	0.207	22.58	15.74	1.56	3	5	0.249	0.249	1
NR1I3	1415	6883	46	8252	10	36	0.17	-0.26	0.6	0.25	21.74	17.03	1.35	7	5	0.000304	0.25	1
DUOX1	1398	7510	99	8812	18	78	0.25	-0.38	0.81	0.25	18.18	15.66	1.24	7	13	0.0318	0.25	1
EXO1	1406	7501	11	8896	3	8	0.08	-0.13	0.25	0.251	27.27	15.77	2	3	1	0.0162	0.251	1
CEP63	1128	7781	21	8888	4	17	0.2	-0.2	0.41	0.251	19.05	12.65	1.62	2	1	0.0586	0.251	1
OBP2B	910	7783	17	8676	3	14	0.12	-0.18	0.37	0.251	17.65	10.45	1.83	2	0	0.00637	0.251	1
SLC5A12	1303	7605	29	8879	6	23	0.18	-0.22	0.45	0.252	20.69	14.61	1.52	4	4	0.0267	0.252	1
TJP2	1595	7314	10	8899	3	7	0.08	-0.08	0.23	0.253	30	17.89	1.97	3	1	0.0227	0.253	1
DNAH9	4159	4751	66	8846	33	31	0.14	-0.2	0.5	0.253	50	46.64	1.22	15	3	9.2e-07	0.253	1
SLAMF8	1366	7535	17	8884	4	13	0.17	-0.17	0.35	0.253	23.53	15.33	1.7	3	1	0.0104	0.253	1
NEIL3	1802	7107	10	8900	3	6	0.07	-0.07	0.21	0.253	30	20.21	1.97	2	1	0.203	0.253	1
CARD14	1744	7128	13	8859	4	9	0.14	-0.14	0.29	0.254	30.77	19.64	1.82	3	1	0.0266	0.254	1
GLB1L2	1774	6896	71	8600	17	53	0.21	-0.28	0.64	0.254	23.94	20.43	1.25	10	9	0.000311	0.254	1
CYP4F3	1147	6768	66	7851	15	49	0.61	0	1.12	0.0369	22.73	14.42	1.81	3	5	0.255	0.255	1
SPAG16	1116	7110	13	8213	3	10	0.1	-0.16	0.31	0.255	23.08	13.55	1.91	2	1	0.0923	0.255	1
TMTC4	1980	6900	28	8854	8	18	0.13	-0.13	0.39	0.216	28.57	22.27	1.55	5	7	0.256	0.256	1
DUSP27	1641	7098	9	8730	3	6	0.08	-0.08	0.23	0.235	33.33	18.76	2.16	1	0	0.257	0.257	1
SCRN2	1764	7142	9	8897	3	6	0.07	-0.07	0.21	0.257	33.33	19.79	2.02	2	1	0.203	0.257	1
STAB1	2597	6313	148	8765	46	99	0.22	-0.35	0.79	0.259	31.08	29.1	1.13	12	16	0.0759	0.259	1
CPA1	1397	7502	16	8883	7	9	0.42	0.13	0.59	0.0062	43.75	15.65	4.18	5	4	0.26	0.26	1
DHTKD1	1229	7679	62	8846	11	51	0.19	-0.33	0.66	0.261	17.74	13.77	1.35	8	3	1.63e-07	0.261	1
PKHD1	2173	6737	187	8726	49	135	0.24	-0.46	0.94	0.261	26.2	24.34	1.13	14	17	0.0034	0.261	1
DUOXA1	1661	7247	8	8900	3	5	0.15	-0.07	0.22	0.163	37.5	18.63	2.62	2	1	0.262	0.262	1
NPC1	1543	6646	121	8068	26	95	0.24	-0.44	0.92	0.262	21.49	18.8	1.18	14	16	4.11e-05	0.262	1
FPR2	1259	7633	8	8884	3	5	0.19	0	0.28	0.088	37.5	14.14	3.64	2	1	0.262	0.262	1
C14orf159	1410	7476	8	8878	3	5	0.17	-0.04	0.25	0.127	37.5	15.85	3.18	2	1	0.262	0.262	1
HDAC5	1177	7717	8	8886	3	5	0.2	0	0.29	0.0657	37.5	13.21	3.93	2	1	0.262	0.262	1
ZFP2	1397	6960	8	8349	3	5	0.17	-0.09	0.26	0.134	37.5	16.7	2.99	2	1	0.262	0.262	1
ZNF502	1027	6160	13	7174	5	8	0.34	0.06	0.57	0.028	38.46	14.25	3.75	2	1	0.263	0.263	1
CELA3A	972	7881	33	8821	5	27	0.23	-0.23	0.52	0.263	15.15	10.96	1.5	4	5	0.0159	0.263	1
UNC5C	1358	7539	12	8885	3	9	0.09	-0.13	0.26	0.264	25	15.25	1.85	2	0	0.014	0.264	1
NMI	921	6887	15	7793	3	12	0.12	-0.18	0.37	0.265	20	11.78	1.87	3	1	0.00561	0.265	1
ABCC10	928	7854	101	8681	13	88	0.24	-0.48	0.96	0.265	12.87	10.54	1.25	9	17	0.000334	0.265	1
SFTPD	1241	6827	28	8040	6	22	0.19	-0.24	0.48	0.265	21.43	15.36	1.5	4	2	0.00372	0.265	1
NRP1	1234	7675	58	8852	10	47	0.19	-0.33	0.66	0.265	17.24	13.83	1.32	8	13	0.00274	0.265	1
WDR62	1453	7374	11	8816	3	8	0.08	-0.12	0.25	0.266	27.27	16.45	1.9	2	1	0.132	0.266	1
GALE	1160	7703	39	8824	7	32	0.2	-0.25	0.55	0.255	17.95	13.07	1.45	3	7	0.266	0.266	1
CCDC38	1129	7491	22	8598	5	17	0.2	-0.1	0.51	0.126	22.73	13.07	1.95	3	5	0.266	0.266	1
KRT19	2319	6589	20	8888	7	13	0.12	-0.15	0.29	0.266	35	26.01	1.53	3	2	0.158	0.266	1
MTO1	889	8020	32	8877	5	27	0.25	-0.25	0.56	0.267	15.62	9.96	1.67	4	5	0.0159	0.267	1
KCNH4	876	4756	70	5563	14	55	0.27	-0.54	1.08	0.268	20	15.5	1.38	10	11	0.000143	0.268	1
TTLL1	1116	6075	8	7184	2	5	0.11	-0.11	0.21	0.268	25	15.51	2.18	2	1	0.156	0.268	1
ZNF77	1287	7593	19	8861	4	15	0.09	-0.18	0.36	0.268	21.05	14.48	1.57	3	2	0.0298	0.268	1
AARS	923	7741	49	8615	8	41	0.36	-0.18	0.79	0.134	16.33	10.62	1.64	3	8	0.268	0.268	1
ANGPTL6	1087	6515	32	7570	6	26	0.21	-0.27	0.54	0.269	18.75	14.28	1.38	5	4	0.002	0.269	1
EXT1	915	6602	42	7475	7	35	0.25	-0.37	0.68	0.27	16.67	12.15	1.44	5	4	0.00123	0.27	1
RPAP1	2210	6698	22	8887	9	12	0.24	0	0.45	0.0485	40.91	24.77	2.27	4	3	0.271	0.271	1
PRMT7	1500	6966	19	8447	5	14	0.16	-0.16	0.32	0.272	26.32	17.7	1.66	4	4	0.0705	0.272	1
D2HGDH	1274	6538	26	7786	6	20	0.19	-0.23	0.47	0.272	23.08	16.29	1.54	4	4	0.0422	0.272	1
DCHS2	2062	6847	91	8818	24	67	0.19	-0.35	0.66	0.273	26.37	23.11	1.19	12	13	0.00144	0.273	1
FBXO18	1870	7030	6	8895	2	3	0.07	-0.07	0.14	0.274	33.33	21	2.51	2	0	0.043	0.274	1
COL6A2	1644	7050	93	8602	20	72	0.23	-0.38	0.71	0.275	21.51	18.88	1.19	9	13	0.00862	0.275	1
EFNA4	1310	7591	16	8886	4	11	0.18	-0.09	0.36	0.139	25	14.7	2.11	3	4	0.275	0.275	1
NDUFAF3	1063	7510	8	8565	2	6	0.11	-0.11	0.21	0.276	25	12.39	2.35	2	0	0.0146	0.276	1
MMP27	2000	6909	8	8901	3	5	0.06	-0.06	0.19	0.276	37.5	22.44	2.07	2	1	0.262	0.276	1
DGKG	1416	7492	34	8875	7	26	0.17	-0.25	0.46	0.276	20.59	15.88	1.42	5	4	0.00461	0.276	1
TGM4	1982	5768	29	7721	9	20	0.14	-0.2	0.41	0.277	31.03	25.55	1.31	5	3	0.0155	0.277	1
KRT82	1829	7052	71	8810	17	54	0.21	-0.31	0.62	0.277	23.94	20.57	1.21	6	10	0.112	0.277	1
MYH6	1982	6858	152	8691	37	112	0.26	-0.42	0.85	0.277	24.34	22.38	1.14	14	21	0.00774	0.277	1
GP2	1020	7627	74	8573	14	60	0.56	-0.06	1.11	0.0542	18.92	11.73	1.74	3	7	0.278	0.278	1
PEX6	1590	6485	49	8026	12	37	0.16	-0.27	0.55	0.28	24.49	19.66	1.32	6	3	0.000591	0.28	1
KLK11	1324	7578	31	8871	6	25	0.18	-0.22	0.44	0.281	19.35	14.86	1.37	5	7	0.0243	0.281	1
USH1C	2003	6906	12	8897	4	8	0.06	-0.13	0.26	0.281	33.33	22.47	1.72	2	1	0.196	0.281	1
EFCAB7	1040	6270	13	7297	3	10	0.11	-0.17	0.34	0.281	23.08	14.21	1.81	1	0	0.17	0.281	1
CLDN7	3556	5295	17	8835	8	8	0.09	-0.09	0.24	0.281	47.06	40.16	1.49	3	1	0.178	0.281	1
FOXRED1	1782	6907	35	8654	9	26	0.14	-0.21	0.42	0.282	25.71	20.49	1.34	5	3	0.00523	0.282	1
UNC93A	2046	6843	12	8877	4	8	0.06	-0.13	0.25	0.283	33.33	23	1.67	2	1	0.196	0.283	1
GYS2	963	7564	37	8490	8	29	0.47	-0.06	0.82	0.054	21.62	11.25	2.17	2	3	0.283	0.283	1
RBL2	1418	5483	81	6821	19	61	0.27	-0.4	0.84	0.284	23.46	20.51	1.2	10	9	0.000297	0.284	1
RARS	1715	7143	18	8840	5	13	0.07	-0.14	0.29	0.285	27.78	19.34	1.6	3	0	0.00084	0.285	1
C11orf40	1619	7290	10	8899	3	7	0.08	-0.11	0.23	0.285	30	18.16	1.93	3	1	0.0227	0.285	1
SMARCA2	2217	6555	21	8751	7	14	0.12	-0.15	0.3	0.286	33.33	25.25	1.48	4	2	0.0307	0.286	1
SURF1	1603	7297	34	8866	8	26	0.15	-0.23	0.46	0.287	23.53	17.99	1.4	6	5	0.00338	0.287	1
UGGT2	2005	6895	24	8876	7	17	0.13	-0.16	0.32	0.287	29.17	22.51	1.42	4	2	0.0163	0.287	1
RBM26	1453	7453	34	8873	7	26	0.16	-0.25	0.45	0.287	20.59	16.3	1.38	5	5	0.0113	0.287	1
EPHA5	1039	7731	17	8754	3	13	0.11	-0.22	0.33	0.287	17.65	11.83	1.72	2	2	0.149	0.287	1
ACTL8	934	6161	14	7081	3	11	0.12	-0.25	0.37	0.288	21.43	13.15	1.8	3	2	0.0305	0.288	1
DHRS1	1794	7114	25	8883	7	18	0.14	-0.14	0.38	0.229	28	20.12	1.54	3	4	0.289	0.289	1
IMPDH2	1055	7518	15	8558	3	12	0.11	-0.22	0.32	0.289	20	12.29	1.78	2	2	0.169	0.289	1
ABCF2	1293	7616	35	8874	8	27	0.27	-0.14	0.63	0.112	22.86	14.48	1.75	5	11	0.289	0.289	1
SERPINA10	1889	6993	31	8852	8	22	0.13	-0.2	0.4	0.291	25.81	21.25	1.35	4	5	0.146	0.291	1
DAAM1	1459	7446	37	8868	9	28	0.25	-0.16	0.57	0.143	24.32	16.35	1.64	3	5	0.291	0.291	1
EZR	1998	6901	42	8859	11	29	0.13	-0.23	0.45	0.291	26.19	22.43	1.31	6	3	0.00124	0.291	1
UTP11L	1064	7839	10	8893	4	6	0.32	0.05	0.43	0.0275	40	11.92	4.91	2	1	0.292	0.292	1
KIAA0141	1636	7271	10	8897	4	6	0.15	-0.04	0.3	0.114	40	18.34	2.96	2	1	0.292	0.292	1
DHRSX	1687	7149	18	8818	5	13	0.15	-0.15	0.29	0.265	27.78	19.07	1.63	2	2	0.292	0.292	1
NDE1	930	7891	8	8813	2	6	0.12	-0.12	0.24	0.197	25	10.53	2.83	2	2	0.292	0.292	1
C1orf87	952	7917	8	8861	2	6	0.12	-0.12	0.24	0.217	25	10.72	2.77	2	2	0.292	0.292	1
MAN1A1	1624	7283	11	8897	4	6	0.15	-0.04	0.3	0.0957	36.36	18.21	2.99	2	1	0.292	0.292	1
MCEE	924	7848	26	8746	4	22	0.12	-0.24	0.48	0.292	15.38	10.52	1.54	2	4	0.254	0.292	1
ZNF701	1408	7418	18	8809	4	13	0.08	-0.17	0.34	0.293	22.22	15.94	1.62	2	2	0.22	0.293	1
TRPV3	3191	5717	52	8856	21	31	0.1	-0.22	0.44	0.293	40.38	35.79	1.21	10	4	0.000384	0.293	1
CACNB2	973	6121	80	7014	13	67	0.24	-0.54	0.89	0.295	16.25	13.69	1.22	6	9	0.00814	0.295	1
PCDHGA2	1488	6540	20	8008	5	15	0.08	-0.16	0.33	0.295	25	18.52	1.47	3	4	0.222	0.295	1
GRID2	1025	7788	29	8784	5	24	0.22	-0.22	0.5	0.252	17.24	11.61	1.58	2	4	0.296	0.296	1
ATP11B	958	7916	25	8849	6	19	0.35	0	0.7	0.0437	24	10.76	2.61	3	5	0.297	0.297	1
PCDHGA3	1781	6469	30	8221	8	21	0.14	-0.21	0.43	0.297	26.67	21.57	1.38	3	4	0.274	0.297	1
ZNF227	911	7175	25	8061	4	21	0.12	-0.25	0.49	0.298	16	11.25	1.5	2	2	0.102	0.298	1
GNPAT	1032	6270	33	7269	7	26	0.23	-0.23	0.68	0.176	21.21	14.1	1.64	3	6	0.299	0.299	1
ZFYVE26	1547	7358	17	8889	4	12	0.08	-0.16	0.31	0.3	23.53	17.36	1.59	3	2	0.0522	0.3	1
SCARA5	1740	7166	14	8892	4	10	0.07	-0.14	0.29	0.3	28.57	19.52	1.65	2	1	0.14	0.3	1
TEX14	1575	7332	67	8840	14	53	0.15	-0.35	0.62	0.301	20.9	17.66	1.23	8	6	0.000129	0.301	1
HARS2	1233	7663	28	8869	5	22	0.09	-0.24	0.38	0.301	17.86	13.85	1.41	2	2	0.132	0.301	1
SLC7A7	1912	6996	48	8860	12	36	0.13	-0.27	0.47	0.302	25	21.44	1.22	5	5	0.033	0.302	1
TDRD10	1131	7777	15	8893	3	12	0.1	-0.2	0.3	0.303	20	12.68	1.72	2	1	0.0681	0.303	1
LTF	2229	6665	14	8880	6	8	0.18	-0.03	0.33	0.087	42.86	25.03	2.24	3	2	0.303	0.303	1
COL9A3	1366	7118	70	8415	13	56	0.17	-0.39	0.65	0.303	18.57	16.08	1.21	7	7	0.001	0.303	1
MYLK	1243	7665	26	8882	5	21	0.09	-0.23	0.37	0.303	19.23	13.94	1.47	2	3	0.245	0.303	1
INPP5K	2712	6195	34	8874	12	21	0.11	-0.19	0.37	0.304	35.29	30.43	1.31	9	7	0.0104	0.304	1
ITGA2	1795	7063	29	8830	7	21	0.14	-0.21	0.35	0.305	24.14	20.25	1.31	4	4	0.0605	0.305	1
ATP6V0A2	1587	7319	72	8837	14	55	0.15	-0.35	0.61	0.304	19.44	17.8	1.17	4	10	0.305	0.305	1
RAPSN	1016	7826	23	8819	4	19	0.11	-0.22	0.44	0.305	17.39	11.48	1.62	2	3	0.212	0.305	1
STRN3	945	7769	42	8672	6	36	0.24	-0.36	0.59	0.305	14.29	10.83	1.37	3	6	0.109	0.305	1
IFIT1	905	7987	44	8848	6	38	0.25	-0.37	0.62	0.305	13.64	10.16	1.39	5	8	0.00693	0.305	1
KIF17	2119	6781	42	8858	12	30	0.12	-0.25	0.43	0.305	28.57	23.79	1.28	5	6	0.117	0.305	1
NEBL	1415	7492	29	8878	6	23	0.17	-0.25	0.42	0.305	20.69	15.87	1.38	4	0	6.27e-06	0.305	1
FAM120B	1050	7639	9	8680	2	7	0.11	-0.11	0.22	0.306	22.22	12.07	2.08	2	1	0.0923	0.306	1
IFT140	1113	5556	39	6630	8	31	0.22	-0.32	0.65	0.309	20.51	16.67	1.29	3	6	0.27	0.309	1
ACO1	1485	7187	17	8655	4	13	0.08	-0.16	0.33	0.309	23.53	17.11	1.49	3	1	0.0104	0.309	1
MASP2	1328	7423	43	8709	8	34	0.18	-0.31	0.53	0.31	18.6	15.16	1.32	8	4	5.95e-07	0.31	1
MYO1E	1496	7412	53	8858	10	40	0.16	-0.28	0.52	0.31	18.87	16.78	1.24	6	8	0.0139	0.31	1
CPZ	1070	7824	33	8862	5	27	0.11	-0.27	0.42	0.31	15.15	12.02	1.35	2	4	0.249	0.31	1
NR1D1	949	7942	52	8840	7	44	0.24	-0.35	0.65	0.311	13.46	10.66	1.33	3	9	0.228	0.311	1
SMYD4	3552	5356	24	8884	11	13	0.09	-0.14	0.28	0.311	45.83	39.86	1.28	4	1	0.0322	0.311	1
TEK	2636	6273	23	8886	10	13	0.16	-0.05	0.38	0.109	43.48	29.55	1.83	3	2	0.312	0.312	1
MBOAT7	1924	6982	3	8903	3	0	0.13	0.07	0.2	0.00973	100	21.58	0	3	0	0.312	0.312	1
TRPC6	1020	5593	30	6583	6	24	0.12	-0.35	0.58	0.312	20	15.4	1.37	4	4	0.0231	0.312	1
SCEL	1695	7213	25	8883	6	19	0.07	-0.18	0.36	0.312	24	19.01	1.34	4	2	0.00624	0.312	1
TBC1D2	1314	6433	5	7742	3	2	0.18	0	0.27	0.0336	60	16.93	7.34	3	1	0.312	0.312	1
ASCC3	2132	6777	23	8886	8	15	0.18	-0.09	0.37	0.156	34.78	23.9	1.7	3	3	0.312	0.312	1
ZYX	1592	7315	31	8876	7	24	0.15	-0.23	0.38	0.313	22.58	17.86	1.34	3	3	0.0891	0.313	1
PNPLA6	2093	6793	20	8866	6	14	0.06	-0.16	0.31	0.313	30	23.54	1.39	2	1	0.15	0.313	1
SLC25A2	1424	7479	13	8891	5	7	0.25	0.04	0.42	0.03	38.46	15.96	3.75	2	1	0.314	0.314	1
MTBP	1037	7511	10	8538	2	8	0.11	-0.11	0.22	0.314	20	12.12	1.81	2	2	0.189	0.314	1
KL	1323	7578	13	8888	3	10	0.09	-0.18	0.27	0.314	23.08	14.85	1.72	3	1	0.00911	0.314	1
GATA2	965	7860	26	8799	4	22	0.12	-0.23	0.47	0.314	15.38	10.92	1.48	2	4	0.254	0.314	1
TMPRSS15	1498	7345	54	8789	11	43	0.16	-0.32	0.56	0.315	20.37	16.92	1.25	5	8	0.0638	0.315	1
FBN2	2013	6859	217	8659	52	161	0.19	-0.55	0.93	0.315	23.96	22.65	1.1	30	25	1.14e-11	0.315	1
SHROOM1	920	7783	5	8698	2	3	0.24	0	0.24	0.0866	40	10.55	5.64	2	1	0.316	0.316	1
EEA1	1085	7798	9	8874	2	7	0.1	-0.1	0.21	0.316	22.22	12.2	2.05	2	1	0.0923	0.316	1
HERC2	1122	7784	47	8859	7	40	0.2	-0.31	0.51	0.316	14.89	12.59	1.21	4	5	0.0144	0.316	1
GJB4	1111	7098	68	8141	11	57	0.21	-0.42	0.73	0.317	16.18	13.51	1.23	6	13	0.0395	0.317	1
SLC26A9	896	4686	113	5469	20	93	0.27	-0.73	1.26	0.318	17.7	16.02	1.12	14	23	6.81e-05	0.318	1
ACTL7A	1883	7022	66	8839	16	50	0.13	-0.3	0.54	0.319	24.24	21.12	1.19	10	14	0.00847	0.319	1
LPCAT4	941	6375	14	7302	4	10	0.24	-0.06	0.49	0.0798	28.57	12.83	2.71	2	2	0.319	0.319	1
ACE	1905	6960	14	8851	4	10	0.07	-0.13	0.27	0.319	28.57	21.48	1.46	2	1	0.14	0.319	1
COL14A1	2010	6801	84	8728	21	62	0.13	-0.35	0.61	0.32	25	22.79	1.15	12	12	0.000323	0.32	1
SERPINB7	1003	6619	35	7587	7	28	0.34	-0.23	0.69	0.165	20	13.13	1.65	4	10	0.32	0.32	1
ADCY8	1027	7405	31	8401	5	26	0.11	-0.28	0.44	0.32	16.13	12.17	1.39	4	2	0.000946	0.32	1
TLN1	2431	6479	14	8896	5	9	0.06	-0.11	0.23	0.321	35.71	27.27	1.48	4	1	0.00589	0.321	1
KRT27	1533	7375	32	8876	7	25	0.16	-0.24	0.43	0.279	21.88	17.19	1.35	3	6	0.321	0.321	1
OR51L1	1727	7171	6	8892	2	4	0.07	-0.07	0.14	0.321	33.33	19.4	2.08	2	0	0.028	0.321	1
UBA7	1356	5599	40	6916	9	30	0.18	-0.32	0.55	0.322	22.5	19.48	1.24	4	7	0.206	0.322	1
THBS2	2295	6582	40	8837	12	28	0.12	-0.24	0.41	0.322	30	25.83	1.23	7	6	0.0134	0.322	1
PAPL	975	7633	33	8575	5	28	0.12	-0.29	0.46	0.324	15.15	11.31	1.4	2	5	0.319	0.324	1
NLRP1	2218	4861	12	7067	5	7	0.07	-0.13	0.26	0.326	41.67	31.31	1.57	4	1	0.0134	0.326	1
SLC12A3	1637	7263	109	8792	22	86	0.15	-0.45	0.71	0.327	20.18	18.37	1.13	11	13	0.000273	0.327	1
CEP350	1075	7597	16	8656	3	13	0.11	-0.21	0.32	0.327	18.75	12.38	1.63	2	3	0.262	0.327	1
VPS13A	1679	6069	31	7717	8	23	0.15	-0.23	0.42	0.328	25.81	21.65	1.26	6	3	0.000542	0.328	1
ANKRD35	1359	7549	42	8866	10	32	0.35	-0.13	0.69	0.105	23.81	15.22	1.74	2	3	0.328	0.328	1
HEATR2	933	7643	24	8552	6	18	0.48	0	0.72	0.0405	25	10.84	2.73	3	5	0.329	0.329	1
PRSS21	1141	7766	16	8891	3	13	0.1	-0.2	0.3	0.329	18.75	12.8	1.57	2	3	0.262	0.329	1
FRS3	1162	7693	10	8846	2	7	0.1	-0.15	0.2	0.33	20	13.11	1.89	2	0	0.0112	0.33	1
CDCA2	1866	7034	10	8890	3	7	0.07	-0.14	0.2	0.331	30	20.96	1.62	2	1	0.162	0.331	1
KRT37	1139	5995	41	7093	10	31	0.31	-0.16	0.78	0.125	24.39	15.92	1.7	4	8	0.331	0.331	1
LRP10	1215	7664	29	8851	5	23	0.1	-0.24	0.38	0.332	17.24	13.67	1.37	4	6	0.0497	0.332	1
ADAMTSL3	1701	7171	70	8803	15	54	0.15	-0.36	0.58	0.333	21.43	19.15	1.17	7	6	0.00139	0.333	1
NOC3L	1200	5250	11	6439	3	8	0.1	-0.2	0.31	0.333	27.27	18.59	1.64	2	1	0.132	0.333	1
PTPRH	2028	6878	53	8853	14	39	0.13	-0.29	0.48	0.333	26.42	22.75	1.22	6	7	0.0463	0.333	1
LAMA3	1589	7319	76	8833	15	60	0.15	-0.38	0.61	0.333	19.74	17.82	1.15	6	13	0.122	0.333	1
SLC6A3	968	7803	14	8757	3	11	0.23	-0.12	0.35	0.2	21.43	11.02	2.2	2	3	0.334	0.334	1
PZP	1650	7259	42	8868	9	32	0.15	-0.26	0.45	0.334	21.43	18.5	1.24	5	6	0.0308	0.334	1
EP300	1740	7148	96	8793	21	74	0.14	-0.39	0.68	0.334	21.88	19.55	1.17	12	13	0.000123	0.334	1
SRPR	1788	6902	6	8684	2	4	0.07	-0.07	0.14	0.336	33.33	20.57	1.93	2	0	0.028	0.336	1
OCA2	1370	7532	79	8826	14	62	0.17	-0.39	0.65	0.336	17.72	15.36	1.24	4	10	0.232	0.336	1
SETD2	1391	6291	41	7642	9	31	0.18	-0.31	0.53	0.336	21.95	18.08	1.31	5	9	0.145	0.336	1
SDAD1	991	7716	25	8682	4	21	0.11	-0.28	0.46	0.336	16	11.37	1.48	2	2	0.102	0.336	1
ITGB1	1087	7820	41	8869	6	32	0.1	-0.31	0.52	0.336	14.63	12.19	1.35	4	7	0.0515	0.336	1
ADCK3	1318	7584	33	8870	6	26	0.09	-0.27	0.45	0.337	18.18	14.79	1.33	2	4	0.33	0.337	1
CIITA	956	7948	20	8884	3	17	0.12	-0.23	0.35	0.337	15	10.73	1.47	2	3	0.172	0.337	1
TGFBR2	963	6034	15	6982	3	12	0.12	-0.24	0.36	0.338	20	13.75	1.57	2	2	0.169	0.338	1
BCAN	1084	7809	10	8883	2	8	0.11	-0.16	0.21	0.339	20	12.18	1.8	2	2	0.189	0.339	1
PTPN21	1274	6310	52	7533	10	41	0.19	-0.38	0.61	0.339	19.23	16.78	1.21	7	11	0.0129	0.339	1
SLK	2122	6784	25	8882	7	17	0.06	-0.19	0.31	0.34	28	23.81	1.32	6	3	0.00105	0.34	1
GAA	1756	6607	54	8311	13	39	0.14	-0.32	0.5	0.341	24.07	20.97	1.25	9	12	0.0111	0.341	1
PIK3C2B	1417	7491	53	8855	14	39	0.42	-0.08	0.84	0.0614	26.42	15.84	1.9	3	5	0.341	0.341	1
CCDC103	1899	6247	5	8141	2	3	0.07	-0.07	0.14	0.341	40	23.3	2.19	2	0	0.043	0.341	1
ZNF556	1133	7735	10	8858	2	8	0.1	-0.15	0.2	0.342	20	12.77	1.71	2	1	0.0741	0.342	1
PTPRZ1	1268	7625	27	8866	5	22	0.09	-0.28	0.37	0.342	18.52	14.25	1.37	2	4	0.334	0.342	1
CHIT1	1260	7645	15	8890	3	12	0.09	-0.18	0.28	0.342	20	14.14	1.52	2	1	0.0681	0.342	1
LRP5	906	7987	141	8753	16	124	0.25	-0.68	1.04	0.342	11.35	10.17	1.14	6	33	0.292	0.342	1
DSG1	1256	6515	24	7747	5	19	0.09	-0.24	0.38	0.343	20.83	16.15	1.37	5	1	1.33e-05	0.343	1
CASP7	1555	7351	12	8894	3	9	0.08	-0.16	0.23	0.343	25	17.45	1.58	2	2	0.262	0.343	1
MVK	956	6305	36	7225	6	30	0.12	-0.36	0.6	0.344	16.67	13.15	1.32	2	4	0.27	0.344	1
POMT2	1752	7156	43	8865	10	33	0.14	-0.28	0.43	0.344	23.26	19.65	1.24	5	4	0.00937	0.344	1
RHBDL2	1176	7317	3	8490	1	2	0.1	-0.1	0.1	0.346	33.33	13.84	3.11	1	0	0.306	0.346	1
ITGBL1	1351	7553	39	8866	7	31	0.09	-0.31	0.44	0.346	17.95	15.16	1.26	3	3	0.048	0.346	1
LAMC2	1160	6878	25	8013	5	20	0.1	-0.3	0.4	0.346	20	14.41	1.48	3	2	0.0255	0.346	1
PROCA1	1301	7246	9	8538	4	5	0.27	0	0.36	0.034	44.44	15.19	4.46	3	2	0.347	0.347	1
TTC12	1499	7169	12	8656	3	9	0.08	-0.16	0.24	0.347	25	17.28	1.59	3	1	0.012	0.347	1
ALOX12	3127	5781	20	8889	8	11	0.05	-0.15	0.25	0.347	40	35.09	1.34	6	0	3.94e-07	0.347	1
SYTL1	1841	7055	7	8889	3	4	0.14	-0.07	0.21	0.158	42.86	20.68	2.87	2	1	0.348	0.348	1
HPSE2	1153	6912	8	8058	3	4	0.2	0	0.3	0.0737	37.5	14.27	4.5	2	1	0.348	0.348	1
MMP2	1599	7305	7	8897	3	4	0.15	-0.08	0.23	0.145	42.86	17.94	3.43	2	1	0.348	0.348	1
SPG7	1468	6712	73	8107	15	58	0.17	-0.42	0.66	0.348	20.55	17.92	1.18	7	8	0.00444	0.348	1
WDR34	906	8003	8	8902	3	4	0.37	0.12	0.37	0.0159	37.5	10.14	6.62	2	1	0.348	0.348	1
TRIM16L	2115	6645	20	8740	6	14	0.06	-0.19	0.28	0.35	30	24.13	1.35	5	2	0.002	0.35	1
PITX1	1147	7641	10	8778	2	8	0.1	-0.15	0.2	0.35	20	13.04	1.67	2	1	0.0741	0.35	1
CLEC10A	3466	5442	13	8895	9	4	0.19	0.02	0.33	0.0247	69.23	38.86	3.53	4	1	0.35	0.35	1
SPINT1	871	8034	47	8858	6	41	0.13	-0.38	0.64	0.35	12.77	9.77	1.35	3	9	0.196	0.35	1
ZNF610	1309	7516	8	8817	2	6	0.09	-0.13	0.18	0.351	25	14.82	1.91	2	2	0.292	0.351	1
DUSP13	1160	5636	19	6777	4	15	0.1	-0.26	0.42	0.352	21.05	17.06	1.3	3	2	0.0298	0.352	1
SLC7A4	2228	6677	43	8863	12	30	0.12	-0.24	0.42	0.352	27.91	25	1.2	6	8	0.117	0.352	1
CR2	1198	7638	36	8800	6	30	0.1	-0.29	0.48	0.352	16.67	13.55	1.28	5	7	0.0111	0.352	1
PIK3R1	1153	6959	15	8097	3	12	0.1	-0.2	0.3	0.352	20	14.2	1.51	2	3	0.295	0.352	1
TNKS2	1382	6265	21	7627	6	14	0.26	-0.09	0.44	0.135	28.57	18.04	1.94	3	4	0.353	0.353	1
TMC1	942	5744	25	6661	6	19	0.37	-0.12	0.68	0.133	24	14.05	1.93	2	3	0.354	0.354	1
HMCN1	1545	7344	152	8739	29	121	0.16	-0.59	0.86	0.355	19.08	17.35	1.14	14	25	0.00142	0.355	1
HAGH	1164	7682	50	8796	8	42	0.1	-0.35	0.54	0.355	16	13.14	1.26	4	8	0.0826	0.355	1
MPDU1	2891	6017	20	8889	7	12	0.05	-0.15	0.26	0.357	35	32.44	1.21	4	2	0.0495	0.357	1
SETDB2	1709	6565	24	8250	6	18	0.07	-0.22	0.37	0.357	25	20.64	1.28	4	2	0.00753	0.357	1
DGUOK	907	7619	39	8489	5	32	0.12	-0.37	0.49	0.358	12.82	10.63	1.31	5	6	0.00149	0.358	1
NBN	1040	5085	30	6096	6	23	0.12	-0.35	0.58	0.359	20	16.96	1.28	5	5	0.0087	0.359	1
STARD3	1165	7328	21	8472	5	16	0.2	-0.1	0.5	0.141	23.81	13.69	1.97	2	3	0.359	0.359	1
FMO3	1054	6113	33	7134	6	27	0.11	-0.33	0.56	0.359	18.18	14.69	1.29	1	0	0.118	0.359	1
CLCA2	1810	7099	15	8894	4	11	0.07	-0.14	0.28	0.359	26.67	20.31	1.43	3	1	0.0161	0.359	1
TNFRSF10A	1862	7047	27	8882	7	20	0.07	-0.2	0.34	0.36	25.93	20.88	1.32	4	7	0.309	0.36	1
MSH6	1113	7796	112	8799	19	91	0.62	-0.15	1.23	0.0755	16.96	12.43	1.46	6	22	0.361	0.361	1
MYBPH	1221	7687	15	8893	3	12	0.09	-0.19	0.28	0.361	20	13.7	1.57	2	2	0.169	0.361	1
KLHL25	1141	7721	24	8838	4	20	0.1	-0.25	0.4	0.361	16.67	12.86	1.35	4	7	0.0581	0.361	1
PNLIPRP1	1686	7223	67	8843	14	52	0.15	-0.37	0.55	0.362	20.9	18.91	1.15	5	5	0.0148	0.362	1
SYNJ2	1674	7128	155	8650	31	121	0.15	-0.55	0.85	0.362	20	18.99	1.09	18	22	1.98e-06	0.362	1
PINK1	1817	7084	22	8879	7	15	0.14	-0.14	0.41	0.184	31.82	20.39	1.82	2	2	0.363	0.363	1
ADAMTS14	1967	6941	43	8865	12	31	0.2	-0.2	0.49	0.219	27.91	22.05	1.37	4	7	0.363	0.363	1
ITK	1003	7060	24	8039	4	20	0.11	-0.28	0.46	0.363	16.67	12.43	1.41	3	5	0.116	0.363	1
HAP1	1828	7059	19	8868	6	13	0.14	-0.14	0.34	0.208	31.58	20.55	1.78	2	2	0.364	0.364	1
CACNB3	955	7736	29	8662	4	25	0.12	-0.29	0.47	0.365	13.79	10.98	1.3	2	3	0.137	0.365	1
SPECC1	2186	6699	32	8853	9	23	0.06	-0.21	0.36	0.365	28.12	24.59	1.2	3	2	0.0775	0.365	1
DUXA	1449	7381	36	8794	7	29	0.08	-0.29	0.41	0.365	19.44	16.4	1.23	6	6	0.00192	0.365	1
LAMB4	1098	6315	58	7357	10	46	0.11	-0.48	0.64	0.366	17.24	14.79	1.25	5	4	0.00226	0.366	1
LCP1	1313	7564	33	8844	6	27	0.09	-0.27	0.45	0.366	18.18	14.78	1.28	5	1	8.46e-06	0.366	1
TBL3	1278	7430	22	8687	4	17	0.09	-0.23	0.37	0.364	18.18	14.67	1.37	2	4	0.367	0.367	1
FAM57A	2013	5911	9	7915	4	5	0.13	-0.07	0.27	0.162	44.44	25.38	2.35	2	1	0.367	0.367	1
TM4SF5	4315	4593	5	8903	4	1	0.09	-0.02	0.18	0.168	80	48.42	4.26	2	0	0.367	0.367	1
EYS	1004	7897	14	8888	4	9	0.34	0	0.45	0.0463	28.57	11.25	3.5	2	2	0.367	0.367	1
FAM189A2	938	7536	16	8458	3	13	0.12	-0.18	0.36	0.253	18.75	11.05	1.85	3	7	0.368	0.368	1
SECISBP2	1504	6888	17	8375	4	13	0.08	-0.2	0.32	0.368	23.53	17.91	1.41	3	1	0.0104	0.368	1
HEXB	1651	7220	44	8829	9	33	0.07	-0.3	0.45	0.37	20.45	18.6	1.19	6	7	0.0105	0.37	1
SLC26A1	1071	7392	21	8443	4	16	0.11	-0.21	0.43	0.271	19.05	12.64	1.73	1	1	0.37	0.37	1
ARHGEF11	1061	6485	10	7536	3	7	0.22	-0.11	0.33	0.161	30	14.04	2.62	2	2	0.37	0.37	1
OXNAD1	1656	7253	10	8899	3	7	0.07	-0.07	0.22	0.245	30	18.58	1.88	2	2	0.37	0.37	1
SPARCL1	957	6926	11	7873	2	8	0.12	-0.18	0.24	0.37	18.18	12.13	1.81	2	2	0.189	0.37	1
KIF15	1386	7517	31	8872	6	25	0.09	-0.26	0.43	0.37	19.35	15.55	1.3	3	5	0.168	0.37	1
ZNF470	1745	7158	20	8883	5	15	0.07	-0.21	0.29	0.37	25	19.59	1.37	3	3	0.123	0.37	1
BTAF1	1103	5203	41	6267	8	31	0.11	-0.38	0.6	0.37	19.51	17.47	1.22	5	8	0.0621	0.37	1
PLEKHH2	1199	7576	50	8725	8	42	0.1	-0.39	0.53	0.371	16	13.65	1.2	3	9	0.318	0.371	1
AZU1	1649	6982	7	8624	2	5	0.07	-0.11	0.15	0.371	28.57	19.1	1.69	2	0	0.0197	0.371	1
ARFGAP3	1256	6229	9	7477	2	6	0.1	-0.14	0.19	0.371	22.22	16.77	1.65	2	0	0.0146	0.371	1
ACSM5	1237	6746	13	7970	3	10	0.1	-0.19	0.29	0.372	23.08	15.48	1.64	2	2	0.224	0.372	1
CATSPER1	1281	7625	98	8811	16	79	0.18	-0.46	0.78	0.308	16.33	14.36	1.21	4	14	0.372	0.372	1
SOS2	1193	7637	24	8806	4	20	0.1	-0.24	0.39	0.372	16.67	13.5	1.28	1	1	0.31	0.372	1
FARP1	2232	6670	30	8872	9	21	0.06	-0.21	0.33	0.372	30	25.06	1.28	2	2	0.317	0.372	1
CYB5R1	977	4713	26	5664	8	18	0.49	-0.06	0.87	0.0635	30.77	17.11	2.14	5	8	0.372	0.372	1
EXPH5	1472	7437	19	8890	4	15	0.08	-0.2	0.33	0.374	21.05	16.51	1.35	4	2	0.00261	0.374	1
TLCD1	1151	7379	25	8505	4	21	0.1	-0.25	0.4	0.374	16	13.49	1.22	4	3	0.0028	0.374	1
SPTB	2134	6032	50	8118	17	31	0.25	-0.13	0.63	0.104	34	26.08	1.55	4	5	0.375	0.375	1
ART1	983	6264	7	7240	2	5	0.12	-0.12	0.24	0.239	28.57	13.55	2.55	2	2	0.376	0.376	1
NFATC4	1603	7305	12	8896	3	9	0.08	-0.15	0.23	0.376	25	17.99	1.52	2	0	0.014	0.376	1
CRIP3	1025	7883	11	8897	2	9	0.11	-0.22	0.22	0.376	18.18	11.5	1.71	2	2	0.156	0.376	1
IFIT5	930	6505	40	7395	6	34	0.12	-0.43	0.61	0.377	15	12.49	1.23	4	7	0.0422	0.377	1
MMP8	2002	6907	15	8895	4	10	0.06	-0.16	0.23	0.378	26.67	22.46	1.38	2	1	0.14	0.378	1
RASAL1	981	7910	20	8871	3	17	0.11	-0.23	0.34	0.378	15	11.02	1.42	2	5	0.358	0.378	1
GRIN3A	1841	7065	24	8882	6	18	0.07	-0.21	0.31	0.37	25	20.66	1.28	2	3	0.379	0.379	1
SYNE1	3793	5119	74	8839	33	40	0.09	-0.3	0.46	0.38	44.59	42.54	1.11	10	4	0.00276	0.38	1
IGHMBP2	1150	7516	62	8605	13	48	0.5	-0.05	0.95	0.0575	20.97	13.21	1.77	6	17	0.381	0.381	1
GOT2	1172	7162	16	8318	3	13	0.1	-0.2	0.3	0.382	18.75	14.05	1.41	2	2	0.149	0.382	1
TLR10	1374	6307	27	7654	6	21	0.09	-0.27	0.4	0.382	22.22	17.87	1.31	3	2	0.0361	0.382	1
PPP1R15A	1819	6350	6	8163	2	4	0.07	-0.11	0.14	0.383	33.33	22.26	1.75	2	1	0.216	0.383	1
PRDM7	1516	7380	42	8855	8	33	0.08	-0.32	0.44	0.384	19.05	17.03	1.18	4	5	0.0436	0.384	1
PLCD1	1240	3767	49	4959	13	35	0.11	-0.48	0.75	0.384	26.53	24.74	1.13	6	10	0.199	0.384	1
TRPM8	1216	7688	42	8863	11	30	0.57	0.1	0.86	0.0174	26.19	13.6	2.32	5	10	0.384	0.384	1
GPR113	1094	7785	16	8863	3	13	0.1	-0.21	0.31	0.295	18.75	12.31	1.64	2	4	0.386	0.386	1
FLG2	1736	6471	37	8171	10	26	0.07	-0.29	0.44	0.387	27.03	21.12	1.43	4	0	3.5e-05	0.387	1
CAD	893	8016	129	8781	14	114	0.12	-0.68	0.93	0.387	10.85	10.01	1.1	9	23	0.000926	0.387	1
TIMM44	1503	7390	13	8880	6	7	0.32	0.08	0.48	0.00974	46.15	16.86	4.21	2	1	0.389	0.389	1
PNPLA2	1758	7064	13	8809	6	7	0.21	0	0.43	0.0365	46.15	19.89	3.44	2	1	0.389	0.389	1
CNNM1	951	7844	13	8782	6	7	0.59	0.29	0.71	0.000646	46.15	10.76	7.07	2	1	0.389	0.389	1
NELL1	1173	7736	61	8848	9	52	0.1	-0.44	0.59	0.389	14.75	13.16	1.14	7	6	3.56e-05	0.389	1
SFXN3	1835	6989	20	8804	5	15	0.07	-0.21	0.28	0.389	25	20.79	1.27	3	3	0.123	0.389	1
ABCB1	1170	7737	71	8840	10	57	0.1	-0.44	0.59	0.389	14.08	13.12	1.16	6	9	0.00421	0.389	1
NID1	1504	7001	50	8455	11	39	0.16	-0.28	0.57	0.258	22	17.66	1.31	4	10	0.39	0.39	1
FLT4	1281	7533	20	8794	5	15	0.18	-0.14	0.46	0.175	25	14.51	1.96	2	3	0.391	0.391	1
KIF2B	1252	7449	16	8685	3	13	0.09	-0.19	0.28	0.392	18.75	14.38	1.37	2	4	0.386	0.392	1
MAN2A1	1345	7088	32	8401	6	26	0.09	-0.31	0.4	0.393	18.75	15.94	1.22	4	4	0.0176	0.393	1
TBX10	1215	7686	29	8872	5	24	0.1	-0.29	0.38	0.365	17.24	13.64	1.32	2	5	0.394	0.394	1
PCDHB7	1754	6157	37	7875	9	27	0.07	-0.29	0.4	0.394	24.32	22.16	1.17	5	5	0.0305	0.394	1
EMID1	1043	6849	17	7875	3	14	0.11	-0.22	0.33	0.395	17.65	13.21	1.41	3	2	0.0162	0.395	1
AARS2	1416	7474	33	8857	7	26	0.17	-0.21	0.46	0.269	21.21	15.91	1.42	2	4	0.395	0.395	1
THRB	935	5413	36	6312	10	26	0.63	0	1.07	0.0318	27.78	14.65	2.23	3	5	0.395	0.395	1
FGL1	1415	7066	30	8451	6	24	0.08	-0.3	0.38	0.396	20	16.67	1.25	3	7	0.353	0.396	1
RRP9	910	4230	18	5122	4	14	0.13	-0.33	0.53	0.396	22.22	17.69	1.33	2	1	0.0815	0.396	1
ALAS1	1125	6133	45	7214	8	36	0.11	-0.42	0.58	0.396	17.78	15.48	1.21	4	4	0.0166	0.396	1
PCDHB6	1373	7532	8	8897	2	6	0.09	-0.17	0.17	0.397	25	15.41	1.83	2	0	0.0146	0.397	1
SERPINB10	1438	5188	28	6598	7	21	0.09	-0.31	0.44	0.398	25	21.69	1.2	3	2	0.053	0.398	1
HABP2	2051	6859	77	8833	19	58	0.06	-0.38	0.54	0.4	24.68	23	1.1	9	11	0.0084	0.4	1
ADAMTSL1	2206	6680	32	8854	9	23	0.06	-0.24	0.33	0.4	28.12	24.81	1.18	5	9	0.356	0.4	1
OR1J2	1988	6758	14	8732	4	10	0.07	-0.16	0.23	0.401	28.57	22.72	1.36	2	1	0.14	0.401	1
OR5AU1	1014	7724	12	8726	2	10	0.11	-0.22	0.22	0.402	16.67	11.6	1.52	1	0	0.13	0.402	1
SDHB	2129	6776	44	8863	11	31	0.06	-0.28	0.37	0.403	25	23.9	1.13	10	4	1.52e-07	0.403	1
SLC2A9	1712	7195	30	8877	7	23	0.07	-0.22	0.36	0.342	23.33	19.21	1.28	1	1	0.403	0.403	1
EFCAB6	1989	6916	29	8877	7	21	0.06	-0.23	0.32	0.403	24.14	22.33	1.16	4	4	0.0605	0.403	1
NBPF3	1302	7597	23	8876	4	19	0.09	-0.27	0.36	0.403	17.39	14.62	1.23	2	3	0.212	0.403	1
CAMK1	931	4276	8	5199	2	6	0.13	-0.26	0.26	0.405	25	17.87	1.53	2	2	0.292	0.405	1
SLC37A2	1840	6799	20	8619	5	15	0.07	-0.21	0.28	0.405	25	21.29	1.23	2	3	0.391	0.405	1
PNPT1	915	7888	13	8790	2	11	0.12	-0.24	0.24	0.406	15.38	10.39	1.57	2	1	0.043	0.406	1
PTPN3	1504	7221	36	8690	7	28	0.08	-0.32	0.4	0.407	19.44	17.23	1.2	6	5	0.000915	0.407	1
HSPA8	937	4067	7	4997	2	5	0.13	-0.26	0.26	0.409	28.57	18.71	1.74	2	2	0.376	0.409	1
DBH	1763	7087	26	8825	6	19	0.07	-0.21	0.32	0.375	23.08	19.91	1.27	3	6	0.41	0.41	1
TARS2	947	6869	18	7798	4	14	0.24	-0.12	0.48	0.19	22.22	12.09	2.07	1	1	0.41	0.41	1
ARVCF	1102	7680	18	8764	4	14	0.21	-0.16	0.42	0.221	22.22	12.53	1.99	1	1	0.41	0.41	1
CUTC	1362	7547	24	8887	4	18	0.09	-0.26	0.3	0.41	16.67	15.28	1.23	2	0	0.00657	0.41	1
SIGLEC10	1058	7847	19	8887	4	14	0.21	-0.11	0.43	0.14	21.05	11.86	2.12	1	1	0.41	0.41	1
ZFHX3	1796	7111	88	8819	19	69	0.07	-0.45	0.59	0.41	21.59	20.15	1.09	10	10	0.000248	0.41	1
SRR	3139	5769	21	8888	8	12	0.05	-0.17	0.25	0.413	38.1	35.23	1.23	6	0	2.46e-07	0.413	1
DHRS3	910	7594	22	8482	3	19	0.12	-0.31	0.37	0.414	13.64	10.69	1.32	3	3	0.0186	0.414	1
AP4B1	952	7956	13	8895	2	11	0.12	-0.24	0.24	0.414	15.38	10.68	1.52	2	0	0.00506	0.414	1
NEDD4	1522	7384	31	8875	6	25	0.08	-0.28	0.36	0.414	19.35	17.08	1.16	3	2	0.0231	0.414	1
HEATR5B	1087	7815	15	8888	3	11	0.1	-0.16	0.31	0.236	20	12.2	1.96	1	1	0.414	0.414	1
COL11A2	1066	7840	44	8863	6	37	0.11	-0.37	0.48	0.416	13.64	11.96	1.19	3	5	0.0674	0.416	1
SLC7A13	944	5279	39	6184	7	32	0.12	-0.5	0.62	0.417	17.95	15.15	1.22	3	8	0.34	0.417	1
GJB5	1260	6970	53	8177	9	44	0.09	-0.42	0.52	0.418	16.98	15.3	1.13	4	9	0.141	0.418	1
ZNF432	1127	5349	36	6440	8	28	0.21	-0.32	0.64	0.282	22.22	17.38	1.36	2	4	0.418	0.418	1
TEC	1075	7452	18	8509	3	15	0.11	-0.27	0.32	0.419	16.67	12.6	1.39	2	0	0.00562	0.419	1
FMN2	1380	7508	9	8879	2	7	0.09	-0.17	0.17	0.419	22.22	15.52	1.55	2	0	0.0112	0.419	1
THUMPD3	1495	7305	8	8792	2	6	0.08	-0.16	0.16	0.419	25	16.98	1.63	2	2	0.292	0.419	1
ALDH5A1	1898	6865	32	8731	8	24	0.07	-0.27	0.34	0.419	25	21.65	1.21	4	4	0.0615	0.419	1
CGN	1293	7608	49	8853	8	40	0.09	-0.36	0.45	0.419	16.33	14.51	1.18	3	8	0.281	0.419	1
FANCA	2358	5791	67	8085	20	44	0.06	-0.36	0.48	0.421	29.85	28.92	1.12	11	9	0.00155	0.421	1
VPS41	917	7992	14	8895	2	12	0.12	-0.24	0.24	0.421	14.29	10.29	1.45	1	1	0.308	0.421	1
WBP2NL	995	7101	10	8086	2	8	0.11	-0.23	0.23	0.379	20	12.28	1.78	1	1	0.421	0.421	1
CADM4	915	7990	10	8895	2	8	0.12	-0.12	0.24	0.288	20	10.26	2.18	1	1	0.421	0.421	1
TP53BP2	1178	7195	10	8363	2	8	0.1	-0.2	0.2	0.414	20	14.06	1.53	1	1	0.421	0.421	1
WRN	2260	6649	24	8885	7	17	0.06	-0.21	0.3	0.421	29.17	25.36	1.21	5	4	0.0273	0.421	1
IMPG1	1255	6633	15	7873	4	11	0.19	-0.14	0.38	0.21	26.67	15.89	1.92	3	5	0.422	0.422	1
SERPINF2	2342	6368	19	8691	6	13	0.06	-0.18	0.23	0.422	31.58	26.88	1.25	3	4	0.402	0.422	1
POLR2A	3183	5725	12	8896	5	7	0.05	-0.12	0.2	0.424	41.67	35.72	1.28	2	1	0.314	0.424	1
KIAA1324	1133	7767	12	8888	4	8	0.2	0	0.4	0.072	33.33	12.7	3.43	2	2	0.426	0.426	1
SNCB	1911	6998	20	8890	5	14	0.07	-0.2	0.27	0.369	25	21.44	1.31	2	3	0.426	0.426	1
BSND	994	7809	13	8791	4	8	0.34	0	0.45	0.0395	30.77	11.26	3.93	2	2	0.426	0.426	1
LRP4	1198	7711	143	8768	20	121	0.1	-0.68	0.82	0.427	13.99	13.44	1.06	13	12	1.26e-08	0.427	1
PALLD	1258	7580	23	8815	4	19	0.09	-0.28	0.32	0.428	17.39	14.23	1.27	2	4	0.315	0.428	1
SEC23IP	974	7271	30	8216	4	25	0.12	-0.35	0.41	0.428	13.33	11.81	1.19	4	4	0.00387	0.428	1
TEP1	1998	6903	37	8864	9	28	0.06	-0.29	0.35	0.428	24.32	22.44	1.11	5	5	0.0264	0.428	1
TMPRSS4	1287	7615	38	8865	6	31	0.09	-0.32	0.41	0.429	15.79	14.45	1.15	5	6	0.00502	0.429	1
MAN2B2	1536	7372	65	8844	12	52	0.08	-0.43	0.51	0.43	18.46	17.23	1.11	5	14	0.269	0.43	1
OR51V1	1050	7859	15	8894	3	12	0.11	-0.11	0.32	0.224	20	11.77	1.87	2	4	0.43	0.43	1
OR1L3	1538	7053	8	8583	2	6	0.08	-0.16	0.16	0.431	25	17.9	1.53	2	1	0.118	0.431	1
AK7	1313	7501	22	8792	4	18	0.09	-0.27	0.31	0.431	18.18	14.89	1.27	4	1	0.000182	0.431	1
C1orf168	1389	7328	15	8702	3	12	0.09	-0.21	0.26	0.431	20	15.93	1.32	1	1	0.388	0.431	1
CCDC87	957	7943	5	8895	1	4	0.12	-0.12	0.12	0.432	20	10.75	2.07	1	0	0.19	0.432	1
MTR	1612	7280	47	8846	9	37	0.08	-0.34	0.42	0.432	19.15	18.12	1.1	3	3	0.0573	0.432	1
CFHR5	902	7645	31	8516	4	27	0.12	-0.37	0.43	0.433	12.9	10.54	1.26	3	3	0.0161	0.433	1
PSMC1	976	7837	17	8796	4	13	0.23	-0.06	0.46	0.0995	23.53	11.05	2.47	1	1	0.433	0.433	1
C9orf156	996	6916	19	7893	4	15	0.23	-0.17	0.46	0.217	21.05	12.57	1.85	2	4	0.433	0.433	1
CRELD1	2171	6735	50	8856	13	37	0.06	-0.34	0.4	0.433	26	24.37	1.09	6	6	0.0215	0.433	1
BRIP1	1193	7690	61	8822	9	52	0.1	-0.44	0.53	0.435	14.75	13.42	1.12	7	5	1.17e-05	0.435	1
COCH	1004	7715	23	8697	3	19	0.11	-0.28	0.34	0.435	13.04	11.51	1.21	3	1	0.00159	0.435	1
NLRP10	1546	7332	19	8859	4	15	0.08	-0.23	0.27	0.435	21.05	17.41	1.26	3	5	0.226	0.435	1
ALDH3A1	1585	6835	55	8366	11	43	0.08	-0.39	0.47	0.436	20	18.81	1.1	7	6	0.000611	0.436	1
SCARB2	886	5505	17	6374	3	14	0.13	-0.33	0.39	0.436	17.65	13.85	1.33	2	2	0.132	0.436	1
KDM5B	1184	7489	32	8642	5	26	0.1	-0.34	0.39	0.436	15.62	13.64	1.22	3	7	0.216	0.436	1
SDK2	1853	6995	11	8837	3	8	0.07	-0.14	0.2	0.437	27.27	20.93	1.42	3	0	0.000657	0.437	1
PMS2	1139	7584	48	8675	7	41	0.1	-0.4	0.5	0.437	14.58	13.05	1.14	3	9	0.263	0.437	1
NIPSNAP3A	1588	7315	13	8891	3	9	0.08	-0.15	0.23	0.324	23.08	17.83	1.54	2	3	0.437	0.437	1
ACADVL	2697	5423	90	8035	30	55	0.06	-0.42	0.53	0.437	33.33	33.19	1.1	17	13	0.00023	0.437	1
TNNT1	1445	7461	15	8891	3	12	0.08	-0.21	0.25	0.437	20	16.22	1.29	2	4	0.43	0.437	1
CNGA4	1629	7279	79	8830	15	63	0.08	-0.45	0.53	0.438	18.99	18.28	1.06	10	13	0.000392	0.438	1
PDGFRL	1573	7333	24	8884	6	16	0.15	-0.12	0.39	0.171	25	17.64	1.75	2	3	0.439	0.439	1
AMIGO3	2340	6563	6	8897	2	4	0.06	-0.12	0.12	0.439	33.33	26.28	1.4	2	0	0.028	0.439	1
ZNF547	1505	7401	20	8886	4	16	0.08	-0.24	0.28	0.441	20	16.89	1.23	3	3	0.0625	0.441	1
CATSPER4	1888	6338	64	8162	16	48	0.07	-0.41	0.52	0.443	25	22.94	1.12	8	12	0.045	0.443	1
PTPRM	1610	7290	25	8876	5	19	0.08	-0.23	0.3	0.443	20	18.08	1.19	2	2	0.167	0.443	1
COL22A1	2344	6565	166	8744	45	120	0.06	-0.55	0.72	0.443	27.11	26.29	1.05	20	31	0.00769	0.443	1
MARS	1193	7715	11	8897	2	9	0.1	-0.19	0.19	0.443	18.18	13.39	1.44	1	1	0.386	0.443	1
COL5A1	2741	6169	159	8752	50	108	0.05	-0.55	0.66	0.443	31.45	30.75	1.04	21	21	0.000364	0.443	1
PFKM	1003	7511	46	8469	6	39	0.11	-0.45	0.51	0.444	13.04	11.77	1.15	6	5	4.17e-05	0.444	1
DDX27	1212	7511	13	8710	3	10	0.1	-0.14	0.29	0.259	23.08	13.88	1.86	1	1	0.444	0.444	1
LYZL6	1021	5103	13	6111	3	10	0.12	-0.24	0.35	0.359	23.08	16.66	1.5	1	1	0.444	0.444	1
TNS4	1287	6095	13	7369	3	10	0.09	-0.24	0.28	0.445	23.08	17.42	1.42	2	1	0.0923	0.445	1
TMCO4	1657	7174	23	8808	5	18	0.07	-0.22	0.3	0.445	21.74	18.76	1.2	3	1	0.0082	0.445	1
FANCI	1516	5734	60	7191	13	46	0.08	-0.46	0.54	0.445	21.67	20.9	1.07	4	8	0.238	0.445	1
CBS	1150	7212	54	8308	8	46	0.1	-0.45	0.5	0.445	14.81	13.75	1.09	5	8	0.0128	0.445	1
RASA3	1832	7026	30	8828	7	23	0.07	-0.28	0.34	0.446	23.33	20.67	1.17	3	4	0.176	0.446	1
PFKFB2	1332	7524	22	8834	4	18	0.09	-0.27	0.31	0.447	18.18	15.03	1.26	2	3	0.231	0.447	1
ARSB	1568	7136	67	8637	13	54	0.08	-0.43	0.51	0.447	19.4	18	1.1	6	19	0.373	0.447	1
CADPS	1361	7548	22	8888	7	14	0.35	0	0.56	0.0366	31.82	15.23	2.77	3	4	0.448	0.448	1
DCAF4	1621	7281	9	8893	3	6	0.08	-0.08	0.23	0.22	33.33	18.19	2.25	2	2	0.45	0.45	1
FHOD3	1442	7368	9	8801	3	6	0.17	-0.08	0.25	0.191	33.33	16.35	2.55	2	2	0.45	0.45	1
TRIML1	1056	7534	11	8579	2	9	0.11	-0.22	0.22	0.45	18.18	12.29	1.59	2	1	0.0607	0.45	1
DMXL1	1181	6889	9	8061	3	6	0.2	-0.05	0.3	0.123	33.33	14.61	2.92	2	2	0.45	0.45	1
TNC	2342	6567	47	8862	13	34	0.06	-0.32	0.38	0.45	27.66	26.28	1.07	8	5	0.000455	0.45	1
TAAR2	1411	7152	9	8554	3	6	0.17	-0.08	0.25	0.156	33.33	16.46	2.53	2	2	0.45	0.45	1
C1QA	926	5399	11	6315	2	8	0.13	-0.25	0.25	0.452	18.18	14.63	1.46	1	1	0.421	0.452	1
SLC14A1	1247	7559	9	8797	2	7	0.09	-0.19	0.19	0.453	22.22	14.15	1.73	2	1	0.0923	0.453	1
CIT	1358	7540	15	8883	3	12	0.09	-0.22	0.26	0.453	20	15.25	1.39	2	2	0.169	0.453	1
MFN2	1531	7083	42	8572	8	34	0.08	-0.36	0.4	0.454	19.05	17.77	1.09	3	4	0.0983	0.454	1
ABCA1	2005	6897	138	8767	32	103	0.06	-0.55	0.68	0.455	23.19	22.5	1.07	17	13	1.22e-07	0.455	1
NDUFA10	1170	7124	25	8270	4	20	0.1	-0.3	0.35	0.455	16	14.1	1.22	2	1	0.0441	0.455	1
SCUBE1	1464	7324	44	8744	8	36	0.08	-0.37	0.41	0.455	18.18	16.65	1.11	5	8	0.0348	0.455	1
C14orf39	895	8005	6	8894	1	5	0.12	-0.12	0.12	0.456	16.67	10.05	1.79	1	1	0.438	0.456	1
DHCR7	1012	7840	53	8800	7	45	0.11	-0.45	0.56	0.456	13.21	11.42	1.21	6	9	0.00147	0.456	1
PNLDC1	2464	6427	12	8879	4	8	0.06	-0.14	0.17	0.457	33.33	27.71	1.3	3	1	0.0355	0.457	1
KRT33A	1245	7509	57	8698	9	47	0.09	-0.47	0.52	0.457	15.79	14.21	1.15	6	12	0.0241	0.457	1
TTC7B	1212	7641	16	8837	4	12	0.19	-0.1	0.38	0.178	25	13.67	2.1	1	1	0.458	0.458	1
SLC7A9	1016	5528	66	6478	11	55	0.12	-0.64	0.7	0.458	16.67	15.51	1.09	5	11	0.0799	0.458	1
GH1	1442	7198	38	8602	7	31	0.08	-0.33	0.42	0.458	18.42	16.68	1.13	6	9	0.0107	0.458	1
DTYMK	1393	7394	16	8771	4	12	0.17	-0.17	0.34	0.252	25	15.84	1.77	1	1	0.458	0.458	1
COX15	1190	7583	33	8740	5	28	0.1	-0.34	0.39	0.459	15.15	13.56	1.14	3	7	0.183	0.459	1
F12	1225	7336	33	8528	9	24	0.38	0	0.76	0.0349	27.27	14.26	2.25	4	8	0.459	0.459	1
FURIN	1395	7505	42	8858	8	34	0.17	-0.26	0.51	0.297	19.05	15.66	1.27	3	9	0.459	0.459	1
MPO	1812	6204	61	7957	14	45	0.07	-0.39	0.46	0.461	22.95	22.6	1.07	5	9	0.181	0.461	1
KLHL1	1182	5985	22	7146	4	17	0.1	-0.3	0.35	0.461	18.18	16.48	1.19	2	2	0.145	0.461	1
SPTLC2	1115	7774	19	8870	3	16	0.1	-0.26	0.31	0.462	15.79	12.54	1.31	3	3	0.0295	0.462	1
WDR41	1379	7428	44	8765	7	35	0.09	-0.34	0.43	0.462	15.91	15.65	1.08	7	4	3.4e-06	0.462	1
SLC5A8	910	7011	38	7883	5	33	0.12	-0.43	0.5	0.462	13.16	11.48	1.17	3	12	0.389	0.462	1
FHL3	1146	7757	27	8876	4	23	0.1	-0.3	0.35	0.462	14.81	12.87	1.18	4	3	0.002	0.462	1
KRT15	1935	6974	60	8849	14	46	0.07	-0.36	0.43	0.462	23.33	21.71	1.1	10	9	0.000124	0.462	1
TRIM3	1484	6542	13	8013	3	10	0.08	-0.21	0.25	0.464	23.08	18.48	1.32	2	1	0.0923	0.464	1
NIP7	933	6204	9	7128	2	7	0.12	-0.12	0.25	0.324	22.22	13.06	1.9	1	1	0.464	0.464	1
AGMAT	1548	5911	54	7405	12	42	0.08	-0.45	0.49	0.464	22.22	20.74	1.09	9	7	5.41e-05	0.464	1
DOPEY1	1014	7889	9	8894	2	7	0.11	-0.11	0.22	0.271	22.22	11.38	2.22	1	1	0.464	0.464	1
ZNF45	1199	7708	14	8893	5	9	0.29	0.05	0.48	0.0279	35.71	13.43	3.57	2	2	0.466	0.466	1
PMFBP1	2020	6876	18	8878	5	13	0.06	-0.19	0.26	0.4	27.78	22.7	1.31	2	3	0.466	0.466	1
TG	2345	6564	100	8809	27	73	0.06	-0.46	0.52	0.467	27	26.31	1.04	13	14	0.00119	0.467	1
SLC18A1	1942	6959	30	8871	7	23	0.07	-0.26	0.3	0.468	23.33	21.81	1.09	5	5	0.0188	0.468	1
ANK1	1908	7000	53	8856	12	40	0.07	-0.37	0.4	0.469	22.64	21.41	1.1	6	9	0.058	0.469	1
SMARCA5	1044	7865	22	8887	3	19	0.11	-0.33	0.33	0.47	13.64	11.71	1.19	1	2	0.414	0.47	1
TPM2	2479	6430	16	8893	5	11	0.06	-0.17	0.22	0.471	31.25	27.82	1.18	2	0	0.0233	0.471	1
NDUFA9	1495	7413	27	8881	5	22	0.08	-0.28	0.32	0.472	18.52	16.78	1.13	3	4	0.0936	0.472	1
RNASEL	1044	7855	19	8881	4	14	0.22	-0.11	0.43	0.166	21.05	11.71	2.15	2	4	0.472	0.472	1
CIDEB	1708	7200	8	8900	4	4	0.22	0	0.29	0.0382	50	19.15	4.22	2	1	0.472	0.472	1
MPI	950	6981	38	7894	5	32	0.12	-0.42	0.48	0.473	13.16	11.97	1.15	2	4	0.192	0.473	1
ADCK1	1302	7434	25	8712	8	16	0.36	0.05	0.63	0.0212	32	14.85	2.85	4	6	0.473	0.473	1
SCN3A	928	6362	74	7217	10	63	0.12	-0.68	0.74	0.473	13.51	12.72	1.09	5	10	0.023	0.473	1
DDOST	2126	6781	23	8884	6	17	0.06	-0.22	0.25	0.473	26.09	23.86	1.13	3	1	0.0157	0.473	1
NFASC	1625	7285	19	8891	4	15	0.08	-0.23	0.26	0.473	21.05	18.23	1.2	3	2	0.0298	0.473	1
TMEM171	1018	7890	14	8894	2	12	0.11	-0.22	0.22	0.469	14.29	11.42	1.29	1	2	0.473	0.473	1
TMEM44	1165	7706	12	8859	2	10	0.1	-0.2	0.2	0.475	16.67	13.13	1.32	2	2	0.131	0.475	1
NR1H3	1440	7469	36	8875	6	28	0.08	-0.33	0.33	0.476	16.67	16.16	1.11	3	5	0.131	0.476	1
SLC6A9	948	7888	25	8811	3	22	0.12	-0.35	0.35	0.476	12	10.73	1.13	1	2	0.369	0.476	1
LTBP2	1479	6927	65	8342	12	52	0.08	-0.45	0.49	0.476	18.46	17.59	1.08	8	16	0.0229	0.476	1
MAK	991	7864	12	8843	3	9	0.23	-0.11	0.34	0.136	25	11.17	2.65	1	1	0.478	0.478	1
ITPR3	2218	6687	179	8726	45	134	0.06	-0.63	0.69	0.478	25.14	24.9	1.01	24	30	1.18e-05	0.478	1
IQGAP3	1430	7479	42	8868	7	34	0.08	-0.37	0.42	0.478	16.67	16.05	1.08	3	6	0.173	0.478	1
FNDC7	1396	7510	34	8872	13	21	0.68	0.25	0.93	0.00152	38.24	15.59	3.33	4	5	0.479	0.479	1
IFIT3	963	6005	12	6956	2	10	0.12	-0.24	0.24	0.479	16.67	13.82	1.25	2	3	0.239	0.479	1
EIF2B5	1473	7435	71	8838	12	58	0.08	-0.49	0.49	0.48	16.9	16.53	1.04	4	8	0.105	0.48	1
KIAA0196	966	5009	60	5916	10	49	0.12	-0.68	0.68	0.48	16.67	16.16	1.06	2	6	0.429	0.48	1
ABCB5	1503	7395	135	8766	23	109	0.08	-0.64	0.68	0.48	17.04	16.88	1.04	6	15	0.111	0.48	1
GPT	994	7768	31	8731	11	20	0.79	0.4	1.13	0.000648	35.48	11.26	4.3	6	9	0.48	0.48	1
EXOSC10	1522	7388	9	8901	2	7	0.08	-0.16	0.16	0.481	22.22	17.08	1.39	1	1	0.464	0.481	1
PTCH1	1017	5207	120	6105	20	99	0.12	-0.88	0.94	0.481	16.67	16.33	1.03	12	23	0.00094	0.481	1
UPK1B	1555	7354	26	8883	5	21	0.08	-0.27	0.31	0.481	19.23	17.45	1.13	3	2	0.0225	0.481	1
SEC14L2	1646	7243	19	8870	4	15	0.07	-0.22	0.26	0.481	21.05	18.51	1.17	2	3	0.302	0.481	1
GDPD4	1217	7691	14	8894	3	11	0.1	-0.19	0.29	0.3	21.43	13.65	1.72	2	4	0.481	0.481	1
TRAK1	1936	6594	7	8524	3	3	0.13	-0.03	0.2	0.141	42.86	22.68	3.41	2	1	0.481	0.481	1
TMEM41A	945	6483	6	7422	3	3	0.24	0	0.36	0.0319	50	12.69	6.86	2	1	0.481	0.481	1
ST14	1070	7650	29	8691	4	25	0.11	-0.32	0.37	0.482	13.79	12.27	1.14	3	3	0.0197	0.482	1
CUL9	957	7950	24	8883	3	21	0.12	-0.35	0.35	0.483	12.5	10.74	1.19	2	6	0.34	0.483	1
CRYBB3	1339	7459	21	8777	4	17	0.09	-0.26	0.31	0.426	19.05	15.21	1.31	2	5	0.483	0.483	1
KCTD17	1764	7137	13	8888	3	10	0.07	-0.18	0.21	0.483	23.08	19.81	1.21	2	3	0.38	0.483	1
VCAN	1906	6996	68	8834	15	53	0.07	-0.43	0.47	0.485	22.06	21.41	1.04	10	8	2.97e-05	0.485	1
ALDH3B2	1182	7719	49	8853	7	41	0.1	-0.44	0.49	0.486	14.29	13.27	1.11	3	11	0.382	0.486	1
WDR59	1276	7278	15	8539	4	11	0.18	-0.14	0.37	0.205	26.67	14.9	2.07	1	1	0.487	0.487	1
PSG9	916	7287	15	8188	4	11	0.25	-0.06	0.49	0.0815	26.67	11.14	2.89	1	1	0.487	0.487	1
CNTNAP3	929	5645	23	6551	4	19	0.13	-0.38	0.5	0.395	17.39	14.12	1.28	1	2	0.487	0.487	1
COBLL1	932	7132	31	8034	4	26	0.12	-0.42	0.42	0.488	12.9	11.55	1.18	2	3	0.129	0.488	1
MYH7	1486	7160	110	8537	19	90	0.08	-0.61	0.65	0.488	17.27	17.18	1.02	13	19	3.32e-05	0.488	1
GPR137B	1106	5278	9	6375	2	7	0.11	-0.22	0.22	0.489	22.22	17.32	1.36	2	1	0.0923	0.489	1
PLOD1	1335	6838	55	8119	9	45	0.09	-0.45	0.49	0.489	16.36	16.33	1.02	7	13	0.00929	0.489	1
EZH1	1255	6776	16	8015	3	13	0.09	-0.28	0.28	0.489	18.75	15.62	1.25	3	1	0.00452	0.489	1
NES	1056	7834	24	8866	4	20	0.11	-0.21	0.43	0.317	16.67	11.87	1.48	2	6	0.491	0.491	1
HPS4	1508	7382	27	8864	5	21	0.08	-0.28	0.32	0.491	18.52	16.96	1.17	4	3	0.00733	0.491	1
MOCOS	1268	7639	47	8861	7	39	0.09	-0.41	0.46	0.492	14.89	14.23	1.08	5	3	0.000229	0.492	1
WSCD1	1727	7166	18	8875	4	14	0.07	-0.22	0.22	0.493	22.22	19.41	1.19	4	0	6.01e-06	0.493	1
CILP	944	7964	18	8890	3	15	0.12	-0.18	0.36	0.274	16.67	10.58	1.69	1	2	0.493	0.493	1
SLC2A8	1796	6830	26	8600	6	20	0.07	-0.28	0.28	0.494	23.08	20.81	1.14	3	7	0.484	0.494	1
SLCO4C1	1289	7428	12	8706	2	9	0.09	-0.18	0.18	0.494	16.67	14.78	1.28	2	1	0.0607	0.494	1
SEC24C	956	7469	26	8400	5	20	0.24	-0.18	0.59	0.159	19.23	11.32	1.95	2	5	0.494	0.494	1
CPS1	1663	7246	109	8803	20	86	0.07	-0.55	0.59	0.494	18.35	18.66	1.01	7	14	0.0479	0.494	1
FARP2	1212	7301	73	8440	11	62	0.1	-0.53	0.58	0.495	15.07	14.23	1.07	5	6	0.00496	0.495	1
TSTA3	1324	7584	45	8864	7	37	0.09	-0.4	0.4	0.496	15.56	14.86	1.08	7	9	0.000381	0.496	1
SLC12A9	1922	6982	59	8846	20	38	0.53	0.07	0.9	0.0152	33.9	21.5	1.91	5	8	0.496	0.496	1
SYT5	1853	7053	11	8895	4	7	0.14	-0.07	0.27	0.166	36.36	20.79	2.18	2	2	0.497	0.497	1
FGFR2	1138	7743	27	8854	4	23	0.1	-0.35	0.35	0.49	14.81	12.81	1.18	2	7	0.497	0.497	1
NARS	1205	7702	34	8873	5	29	0.1	-0.38	0.38	0.497	14.71	13.52	1.1	3	3	0.0242	0.497	1
PCK2	2285	6623	42	8866	11	31	0.06	-0.32	0.32	0.498	26.19	25.65	1.03	3	4	0.232	0.498	1
PSMD13	2190	6709	6	8893	2	4	0.06	-0.12	0.12	0.449	33.33	24.6	1.53	2	2	0.5	0.5	1
DUSP26	1271	7595	4	8862	2	2	0.18	0	0.18	0.0885	50	14.32	5.98	2	1	0.5	0.5	1
SEMA4G	1987	6775	4	8758	2	2	0.07	-0.07	0.13	0.218	50	22.66	3.41	2	1	0.5	0.5	1
MORC2	1065	6325	4	7386	2	2	0.22	0	0.22	0.101	50	14.39	5.94	2	1	0.5	0.5	1
NRD1	1221	7155	10	8366	2	8	0.1	-0.19	0.19	0.407	20	14.57	1.46	2	4	0.5	0.5	1
PNPLA5	1213	5604	4	6813	2	2	0.1	-0.05	0.2	0.163	50	17.77	4.62	2	1	0.5	0.5	1
SLC30A5	1279	6635	6	7908	2	4	0.09	-0.09	0.19	0.253	33.33	16.15	2.59	2	2	0.5	0.5	1
KIF1B	1837	6005	66	7776	16	50	0	-0.46	0.5	0.501	24.24	23.42	1.05	10	14	0.00847	0.501	1
DPYSL2	1236	7671	20	8887	7	13	0.38	0.09	0.66	0.0131	35	13.83	3.34	3	4	0.502	0.502	1
CSMD2	1902	7006	26	8882	6	20	0	-0.27	0.27	0.502	23.08	21.35	1.11	4	5	0.0821	0.502	1
SCN4B	1593	7313	20	8886	7	13	0.23	-0.04	0.46	0.0648	35	17.85	2.47	3	4	0.502	0.502	1
RGS3	1226	5503	15	6714	3	12	0	-0.3	0.3	0.503	20	18.22	1.12	2	2	0.169	0.503	1
DSC1	1089	7190	26	8253	4	22	0	-0.37	0.32	0.503	15.38	13.15	1.2	3	3	0.0277	0.503	1
EHD2	1156	7615	13	8758	2	11	0	-0.2	0.2	0.503	15.38	13.18	1.2	2	2	0.112	0.503	1
ATP2A3	3189	5640	43	8787	23	19	0.39	0.07	0.66	0.0106	53.49	36.03	2.14	7	5	0.504	0.504	1
SLC22A16	1173	5883	22	7034	4	18	0	-0.31	0.31	0.504	18.18	16.62	1.11	2	4	0.339	0.504	1
FAM161B	1916	6924	3	8837	1	2	0	-0.07	0.07	0.504	33.33	21.67	1.81	1	0	0.306	0.504	1
SLC25A34	1300	7448	31	8717	5	26	0	-0.36	0.36	0.504	16.13	14.86	1.1	4	3	0.0034	0.504	1
CNDP1	1953	6954	11	8896	3	8	0.07	-0.16	0.2	0.467	27.27	21.92	1.34	2	3	0.506	0.506	1
COL9A2	974	7824	53	8746	6	46	0	-0.52	0.46	0.506	11.32	11.07	1.05	4	10	0.0486	0.506	1
KNG1	1415	7084	10	8489	2	8	0	-0.17	0.17	0.507	20	16.65	1.25	1	1	0.421	0.507	1
ADAMTS18	2056	6815	40	8834	9	28	0	-0.32	0.32	0.507	22.5	23.17	1.07	2	4	0.475	0.507	1
SLC6A5	1661	7248	37	8873	7	29	0	-0.33	0.33	0.507	18.92	18.64	1.05	4	5	0.0422	0.507	1
NAGA	1491	7406	48	8850	8	39	0	-0.4	0.4	0.508	16.67	16.76	1.02	6	4	0.000126	0.508	1
INVS	1313	7501	15	8800	4	10	0.18	-0.09	0.36	0.147	26.67	14.88	2.29	2	3	0.509	0.509	1
CAPN7	983	7008	14	7977	4	10	0.23	-0.06	0.46	0.106	28.57	12.27	2.85	2	3	0.509	0.509	1
TRPA1	1237	7023	51	8210	8	42	0	-0.48	0.48	0.509	15.69	14.97	1.08	3	8	0.256	0.509	1
PDE6A	925	5523	90	6359	13	76	0	-0.82	0.82	0.509	14.44	14.34	1.02	7	14	0.00828	0.509	1
AGT	1721	7188	40	8870	8	31	0	-0.36	0.36	0.51	20	19.31	1.08	3	6	0.27	0.51	1
ETNK2	1147	7629	5	8771	1	4	0.1	-0.1	0.1	0.486	20	13.07	1.66	1	1	0.51	0.51	1
PNP	1529	7012	20	8521	4	16	0	-0.24	0.24	0.51	20	17.9	1.15	3	2	0.0252	0.51	1
PSMC3	893	7848	5	8736	1	4	0.12	-0.12	0.12	0.421	20	10.21	2.2	1	1	0.51	0.51	1
BCKDK	967	7940	6	8902	1	4	0.12	-0.12	0.12	0.427	16.67	10.85	2.05	1	1	0.51	0.51	1
SF3B1	1029	7074	5	8098	1	4	0.11	-0.11	0.11	0.492	20	12.69	1.72	1	1	0.51	0.51	1
OR8B2	905	7828	5	8728	1	4	0.12	-0.12	0.12	0.413	20	10.36	2.16	1	1	0.51	0.51	1
RRP36	1032	7847	7	8874	1	4	0.11	-0.11	0.11	0.432	14.29	11.62	1.9	1	1	0.51	0.51	1
METTL4	1019	7885	5	8899	1	4	0.11	-0.11	0.11	0.446	20	11.44	1.93	1	1	0.51	0.51	1
AGAP1	1156	7554	14	8697	2	11	0	-0.2	0.2	0.51	14.29	13.27	1.19	2	0	0.00506	0.51	1
SERPINB2	1437	4898	26	6310	6	19	0	-0.36	0.36	0.51	23.08	22.68	1.08	2	4	0.491	0.51	1
DAPK3	942	7893	5	8830	1	4	0.12	-0.12	0.12	0.407	20	10.66	2.09	1	1	0.51	0.51	1
MPP2	930	7971	5	8896	1	4	0.12	-0.12	0.12	0.4	20	10.44	2.14	1	1	0.51	0.51	1
HERC4	906	7959	6	8860	1	4	0.12	-0.12	0.12	0.42	16.67	10.21	2.2	1	1	0.51	0.51	1
SDF4	867	7850	5	8712	1	4	0.13	-0.13	0.13	0.44	20	9.94	2.26	1	1	0.51	0.51	1
LEPREL1	1195	7691	27	8859	4	23	0	-0.34	0.29	0.51	14.81	13.44	1.12	2	7	0.497	0.51	1
HADHB	1145	7763	45	8863	6	39	0	-0.45	0.4	0.511	13.33	12.85	1.04	2	6	0.318	0.511	1
C17orf80	2058	6825	25	8859	6	18	0	-0.25	0.25	0.511	24	23.16	1.11	3	3	0.122	0.511	1
PCSK7	1536	7372	17	8891	5	12	0.16	-0.08	0.39	0.138	29.41	17.22	2	2	3	0.511	0.511	1
SIGLEC12	1723	7167	17	8873	5	12	0.14	-0.14	0.32	0.234	29.41	19.36	1.73	2	3	0.511	0.511	1
OR51I2	2097	6811	7	8901	2	5	0	-0.12	0.12	0.511	28.57	23.54	1.3	1	0	0.23	0.511	1
CELA1	1414	7493	17	8890	5	12	0.17	-0.08	0.42	0.113	29.41	15.85	2.21	2	3	0.511	0.511	1
ADAM12	2013	6894	21	8887	6	14	0.13	-0.16	0.32	0.292	28.57	22.58	1.47	2	3	0.513	0.513	1
GLI1	1077	7831	14	8894	2	12	0	-0.21	0.21	0.514	14.29	12.09	1.21	2	3	0.178	0.514	1
RPS6KA2	1795	7110	8	8897	2	6	0.07	-0.14	0.14	0.492	25	20.15	1.32	1	1	0.515	0.515	1
DNAJB13	1442	6767	8	8201	2	6	0.08	-0.17	0.17	0.428	25	17.56	1.56	1	1	0.515	0.515	1
PLEKHO2	1024	7841	8	8857	2	6	0.11	-0.11	0.22	0.268	25	11.54	2.55	1	1	0.515	0.515	1
ADAL	923	5305	11	6217	2	9	0	-0.25	0.25	0.515	18.18	14.81	1.28	2	2	0.156	0.515	1
EPHB6	928	6145	17	7056	4	13	0.25	-0.19	0.5	0.198	23.53	13.1	2.04	2	4	0.515	0.515	1
HTR3B	1065	6748	17	7796	4	13	0.22	-0.16	0.43	0.204	23.53	13.61	1.95	2	4	0.515	0.515	1
UTP14C	1238	6852	9	8082	2	6	0.1	-0.14	0.19	0.39	22.22	15.29	1.84	1	1	0.515	0.515	1
ATP6V1B1	1047	7697	60	8685	9	50	0.22	-0.38	0.65	0.295	15	11.95	1.32	2	8	0.515	0.515	1
C1orf174	1513	7394	8	8899	2	6	0.08	-0.16	0.16	0.398	25	16.98	1.63	1	1	0.515	0.515	1
PLEKHG7	1104	7790	8	8886	2	6	0.1	-0.1	0.21	0.209	25	12.4	2.35	1	1	0.515	0.515	1
CPVL	1190	7718	27	8881	4	23	0	-0.34	0.29	0.517	14.81	13.35	1.13	4	1	7.25e-05	0.517	1
SERPINB6	1424	7485	38	8871	12	26	0.5	0.08	0.84	0.013	31.58	15.92	2.43	2	3	0.517	0.517	1
PRDM15	1666	7239	11	8894	3	8	0.07	-0.15	0.22	0.351	27.27	18.7	1.63	1	1	0.518	0.518	1
ESYT1	985	7910	42	8853	5	37	0	-0.46	0.46	0.518	11.9	11.07	1.09	1	3	0.44	0.518	1
LIMCH1	1309	7574	11	8872	3	8	0.09	-0.09	0.27	0.22	27.27	14.72	2.17	1	1	0.518	0.518	1
CES1	1581	7314	27	8868	5	22	0	-0.31	0.31	0.519	18.52	17.77	1.05	3	4	0.0936	0.519	1
EVPL	2057	6791	29	8819	7	22	0	-0.29	0.29	0.519	24.14	23.25	1.05	3	5	0.295	0.519	1
CNDP2	1554	7327	14	8867	4	10	0.16	-0.12	0.31	0.232	28.57	17.48	1.89	1	1	0.52	0.52	1
OR11H6	1540	7356	14	8882	4	10	0.16	-0.08	0.31	0.193	28.57	17.29	1.91	1	1	0.52	0.52	1
MEFV	1431	7462	14	8879	4	10	0.17	-0.08	0.33	0.161	28.57	16.07	2.09	1	1	0.52	0.52	1
TUBAL3	1015	7894	75	8834	9	66	0	-0.61	0.56	0.52	12	11.39	1.06	6	10	0.00175	0.52	1
FZD6	1031	7174	30	8175	4	26	0	-0.39	0.33	0.521	13.33	12.56	1.07	3	3	0.0178	0.521	1
CAPN2	1235	7673	95	8815	13	80	0	-0.61	0.61	0.521	13.68	13.86	1.01	6	16	0.0475	0.521	1
GLRA3	1364	7545	11	8898	2	9	0	-0.17	0.17	0.522	18.18	15.31	1.23	2	0	0.00725	0.522	1
UNC45B	1822	6791	20	8593	6	14	0.14	-0.14	0.35	0.243	30	21.13	1.6	1	1	0.522	0.522	1
ATP10A	1431	7477	80	8828	13	67	0	-0.54	0.5	0.523	16.25	16.06	1.01	3	9	0.31	0.523	1
ADCY3	974	7558	17	8517	2	13	0	-0.29	0.23	0.523	11.76	11.41	1.19	1	1	0.288	0.523	1
HMMR	1523	7311	11	8824	2	8	0	-0.16	0.16	0.523	18.18	17.24	1.2	1	1	0.421	0.523	1
SLC27A6	1058	6875	13	7920	2	11	0	-0.27	0.22	0.525	15.38	13.33	1.18	2	1	0.043	0.525	1
LSG1	1456	7210	21	8645	4	17	0.08	-0.25	0.29	0.472	19.05	16.8	1.17	1	2	0.527	0.527	1
CRTAC1	941	5403	18	6326	3	15	0	-0.37	0.37	0.527	16.67	14.83	1.15	3	6	0.186	0.527	1
ESR1	1166	7739	29	8877	4	24	0	-0.35	0.3	0.527	13.79	13.09	1.11	2	5	0.304	0.527	1
MCC	1732	7177	26	8883	5	21	0	-0.29	0.29	0.527	19.23	19.44	0.99	2	4	0.356	0.527	1
SLC35D2	962	6390	21	7331	3	18	0	-0.36	0.36	0.529	14.29	13.08	1.11	2	3	0.157	0.529	1
DNMBP	1520	6344	14	7850	3	11	0	-0.24	0.24	0.53	21.43	19.32	1.14	1	1	0.414	0.53	1
ZNF577	935	5499	14	6421	5	8	0.38	0	0.63	0.0349	35.71	14.48	3.68	2	2	0.531	0.531	1
CRYZ	1023	7870	6	8887	1	5	0	-0.17	0.11	0.532	16.67	11.5	1.54	1	1	0.438	0.532	1
VWA2	2022	6887	32	8879	7	23	0	-0.29	0.29	0.532	21.88	22.69	1.04	4	4	0.0455	0.532	1
MTMR3	1285	7032	63	8255	10	52	0	-0.51	0.51	0.533	15.87	15.45	1.05	5	11	0.0686	0.533	1
STRN4	1243	7281	25	8499	5	20	0.09	-0.24	0.38	0.318	20	14.57	1.46	1	2	0.533	0.533	1
LGR6	1367	7070	17	8420	3	14	0	-0.26	0.26	0.535	17.65	16.2	1.11	3	2	0.0162	0.535	1
ADAMTS17	1801	7107	25	8884	5	19	0	-0.28	0.28	0.535	20	20.22	1.04	3	4	0.132	0.535	1
P2RX5	3641	5267	11	8897	5	6	0	-0.14	0.16	0.535	45.45	40.87	1.21	5	1	0.00223	0.535	1
B3GALTL	1776	7129	9	8896	2	7	0	-0.14	0.14	0.535	22.22	19.94	1.15	2	1	0.0923	0.535	1
EGFR	1241	7668	36	8874	5	30	0	-0.37	0.37	0.536	13.89	13.93	1.03	2	5	0.289	0.536	1
DCC	2036	6871	13	8895	8	4	0.32	0.13	0.51	0.0018	61.54	22.8	6.75	3	1	0.537	0.537	1
PEAR1	1818	7090	39	8871	8	29	0	-0.35	0.35	0.537	20.51	20.4	1.08	7	4	4.64e-05	0.537	1
ANGPT2	1580	6787	28	8340	7	20	0.16	-0.2	0.39	0.283	25	18.86	1.5	2	4	0.538	0.538	1
HELB	1144	7740	12	8872	2	10	0	-0.2	0.2	0.51	16.67	12.87	1.35	1	2	0.539	0.539	1
SP100	1608	7151	20	8739	4	16	0	-0.27	0.23	0.539	20	18.35	1.11	1	1	0.37	0.539	1
PAFAH2	946	7633	12	8567	2	10	0.12	-0.24	0.24	0.37	16.67	11.02	1.61	1	2	0.539	0.539	1
AOX1	1421	7488	25	8885	4	20	0	-0.29	0.25	0.539	16	15.95	1.05	3	3	0.0355	0.539	1
C9orf152	955	7900	14	8842	3	10	0.23	-0.12	0.35	0.164	21.43	10.77	2.48	2	4	0.54	0.54	1
ATP2B2	1985	6839	59	8766	13	45	0	-0.42	0.39	0.54	22.03	22.5	1	5	5	0.0193	0.54	1
HNF1A	1521	7363	52	8833	9	42	0	-0.44	0.4	0.513	17.31	17.12	1.04	2	7	0.542	0.542	1
STARD13	1545	6767	9	8303	2	7	0	-0.16	0.16	0.542	22.22	18.58	1.25	2	2	0.232	0.542	1
HSD17B3	1352	7500	26	8827	4	21	0	-0.31	0.26	0.542	15.38	15.27	1.06	1	2	0.453	0.542	1
FAT4	2116	6793	55	8855	13	41	0	-0.4	0.37	0.543	23.64	23.75	1.02	7	11	0.0603	0.543	1
CTAGE5	1256	7646	18	8884	3	15	0	-0.28	0.28	0.543	16.67	14.1	1.22	2	4	0.315	0.543	1
CNTNAP1	1740	7163	40	8864	9	30	0.07	-0.29	0.43	0.375	22.5	19.53	1.24	4	11	0.543	0.543	1
KALRN	2041	6868	12	8897	3	9	0	-0.19	0.19	0.544	25	22.91	1.12	3	3	0.126	0.544	1
TMPRSS11A	1047	7862	41	8868	5	36	0	-0.43	0.43	0.545	12.2	11.75	1.04	4	6	0.0106	0.545	1
TSTD2	1079	7650	15	8714	2	13	0	-0.26	0.21	0.545	13.33	12.36	1.09	2	2	0.0843	0.545	1
TIE1	1279	7624	35	8869	5	29	0	-0.37	0.37	0.547	14.29	14.36	1.03	5	4	0.000399	0.547	1
GRN	1880	7015	14	8881	3	11	0	-0.2	0.2	0.548	21.43	21.14	1.02	3	1	0.00708	0.548	1
NOX3	1396	7352	62	8687	10	51	0	-0.51	0.47	0.548	16.13	15.95	1.03	6	13	0.0409	0.548	1
KRT28	1452	7454	74	8832	12	62	0	-0.53	0.49	0.548	16.22	16.3	0.99	4	15	0.402	0.548	1
COL9A1	1880	6843	88	8635	19	69	0	-0.51	0.51	0.548	21.59	21.55	1	8	12	0.0169	0.548	1
KCNH8	1135	7382	91	8427	12	78	0	-0.66	0.61	0.549	13.19	13.33	1	8	22	0.0131	0.549	1
ZNF607	968	7937	26	8879	3	23	0	-0.35	0.35	0.549	11.54	10.87	1.07	2	5	0.227	0.549	1
ALS2CR12	1083	7142	20	8205	4	16	0.11	-0.21	0.43	0.273	20	13.15	1.65	1	2	0.549	0.549	1
MPZL2	1694	6901	32	8565	6	24	0	-0.33	0.29	0.549	18.75	19.71	1.02	3	3	0.062	0.549	1
CENPE	1272	4921	30	6164	6	23	0	-0.45	0.4	0.551	20	20.54	1.01	3	1	0.00706	0.551	1
NUDT12	1051	7430	6	8475	1	5	0	-0.16	0.11	0.551	16.67	12.39	1.41	1	1	0.438	0.551	1
FARSA	1181	7717	16	8884	2	12	0	-0.24	0.2	0.551	12.5	13.27	1.09	1	2	0.473	0.551	1
SEC23A	1246	7623	27	8842	4	23	0	-0.37	0.28	0.551	14.81	14.05	1.06	2	4	0.237	0.551	1
DCHS1	2382	6527	27	8883	7	19	0	-0.26	0.23	0.552	25.93	26.74	1.01	4	1	0.00173	0.552	1
TAS1R1	1318	7591	61	8848	9	52	0	-0.49	0.45	0.553	14.75	14.79	1	5	12	0.0627	0.553	1
DCPS	1678	7029	20	8687	4	16	0	-0.26	0.22	0.553	20	19.27	1.05	3	2	0.0252	0.553	1
PIBF1	1362	6909	11	8260	2	9	0	-0.22	0.18	0.553	18.18	16.46	1.13	2	3	0.282	0.553	1
NR3C2	1133	7771	29	8876	6	22	0.3	-0.15	0.56	0.137	20.69	12.7	1.87	1	2	0.553	0.553	1
TUFM	1257	7623	13	8867	2	11	0	-0.23	0.19	0.554	15.38	14.15	1.1	1	1	0.33	0.554	1
CACNA1S	1920	6988	279	8633	59	216	0	-0.93	0.83	0.554	21.15	21.56	0.99	29	36	1.69e-08	0.554	1
IFT172	1193	6579	51	7723	10	39	0.3	-0.3	0.69	0.211	19.61	15.32	1.41	2	6	0.554	0.554	1
OR10K2	1278	7110	5	8383	1	4	0	-0.14	0.09	0.554	20	15.23	1.39	1	1	0.51	0.554	1
CDH7	1175	7726	6	8895	1	5	0	-0.15	0.1	0.554	16.67	13.2	1.32	1	1	0.438	0.554	1
CREB3L4	1033	6244	20	7257	3	17	0	-0.34	0.34	0.554	15	14.19	1.07	2	3	0.172	0.554	1
RLN1	909	6626	15	7520	2	13	0	-0.31	0.25	0.554	13.33	12.06	1.12	2	3	0.156	0.554	1
CD27	1563	7345	22	8886	4	18	0	-0.27	0.23	0.555	18.18	17.54	1.04	2	5	0.45	0.555	1
KLK3	1267	7604	21	8851	3	17	0	-0.28	0.28	0.555	14.29	14.28	1.06	1	2	0.45	0.555	1
ARSA	958	7438	36	8361	6	29	0.24	-0.29	0.59	0.278	16.67	11.39	1.61	2	7	0.555	0.555	1
TMEM42	2355	6554	13	8896	4	9	0.06	-0.17	0.17	0.492	30.77	26.43	1.24	1	1	0.556	0.556	1
MS4A7	1404	7505	14	8896	4	9	0.17	-0.08	0.34	0.118	28.57	15.74	2.38	1	1	0.556	0.556	1
LIPC	1185	7723	56	8853	10	45	0.29	-0.24	0.68	0.18	17.86	13.27	1.45	2	7	0.556	0.556	1
PANK1	1192	7594	21	8765	3	18	0	-0.29	0.29	0.556	14.29	13.57	1.06	2	3	0.157	0.556	1
CHRNA3	1021	7877	49	8849	7	42	0.22	-0.33	0.61	0.304	14.29	11.46	1.29	2	9	0.556	0.556	1
THYN1	920	4987	20	5887	3	17	0	-0.39	0.39	0.557	15	15.58	0.96	3	1	0.00217	0.557	1
FAHD1	952	7791	7	8736	1	6	0	-0.24	0.12	0.557	14.29	10.89	1.36	1	1	0.383	0.557	1
NUAK2	1490	7419	11	8898	2	9	0	-0.2	0.16	0.557	18.18	16.72	1.11	1	1	0.386	0.557	1
ATP5A1	1137	6529	27	7640	4	22	0	-0.41	0.31	0.557	14.81	14.83	1.04	4	6	0.0247	0.557	1
IL5RA	1549	7360	23	8886	5	18	0.08	-0.23	0.31	0.379	21.74	17.38	1.32	2	5	0.557	0.557	1
HLTF	908	7992	78	8822	8	70	0	-0.67	0.61	0.558	10.26	10.2	1.01	5	12	0.0114	0.558	1
DTNA	935	5955	6	6885	1	4	0	-0.19	0.12	0.558	16.67	13.57	1.59	1	1	0.51	0.558	1
MAN2A2	1789	7118	42	8865	11	31	0.21	-0.21	0.49	0.227	26.19	20.06	1.41	3	7	0.559	0.559	1
PCDHA6	1657	7251	10	8898	2	8	0	-0.19	0.15	0.559	20	18.6	1.09	1	1	0.421	0.559	1
OR51A7	1753	7156	9	8900	2	7	0	-0.14	0.14	0.56	22.22	19.67	1.17	1	1	0.464	0.56	1
TSPAN4	1754	7098	9	8843	2	7	0	-0.14	0.14	0.56	22.22	19.81	1.16	1	1	0.464	0.56	1
ELSPBP1	1618	7288	22	8885	4	17	0	-0.26	0.23	0.561	18.18	18.17	1.06	2	1	0.0586	0.561	1
PRSS50	2177	6477	25	8630	6	18	0	-0.25	0.25	0.563	24	25.16	0.99	4	3	0.0251	0.563	1
ZACN	1977	6929	31	8875	7	24	0	-0.29	0.26	0.563	22.58	22.2	1.02	3	1	0.00962	0.563	1
ARHGEF18	980	6904	15	7869	3	12	0.12	-0.23	0.35	0.284	20	12.42	1.76	2	5	0.564	0.564	1
C3orf62	1170	7101	10	8261	3	7	0.2	-0.1	0.3	0.164	30	14.13	2.6	1	1	0.564	0.564	1
NPR1	938	7353	10	8281	3	7	0.24	0	0.36	0.0837	30	11.29	3.36	1	1	0.564	0.564	1
SLC1A1	1656	6774	10	8420	3	7	0.08	-0.15	0.23	0.347	30	19.63	1.75	1	1	0.564	0.564	1
LAMC3	2263	6581	23	8821	6	17	0	-0.24	0.24	0.564	26.09	25.59	1.03	3	5	0.366	0.564	1
GPATCH1	1366	5497	10	6853	3	7	0.09	-0.18	0.27	0.314	30	19.89	1.72	1	1	0.564	0.564	1
TMEM128	1456	7453	11	8899	3	7	0.16	-0.08	0.25	0.186	27.27	16.33	2.19	1	1	0.564	0.564	1
DHPS	910	6303	22	7191	3	19	0	-0.38	0.38	0.564	13.64	12.61	1.09	1	1	0.268	0.564	1
DDO	1000	5563	12	6551	2	10	0	-0.29	0.24	0.564	16.67	15.23	1.11	2	1	0.0507	0.564	1
TCTN2	1398	7507	34	8872	5	28	0	-0.34	0.34	0.564	14.71	15.7	0.96	4	5	0.014	0.564	1
ZNF528	920	7960	10	8870	3	7	0.24	0	0.36	0.0766	30	10.34	3.71	1	1	0.564	0.564	1
HMGCR	990	5676	26	6640	4	22	0	-0.47	0.36	0.565	15.38	14.85	1.04	3	3	0.0277	0.565	1
CSF3R	1573	7326	10	8889	2	8	0	-0.19	0.15	0.565	20	17.67	1.16	2	2	0.189	0.565	1
SLC4A11	1686	7219	54	8851	10	44	0	-0.44	0.37	0.565	18.52	18.94	0.97	10	5	7.27e-09	0.565	1
NOD2	1023	6811	34	7801	5	28	0.11	-0.39	0.45	0.436	14.71	13.05	1.19	2	8	0.565	0.565	1
OR52N2	1182	7704	14	8872	2	12	0	-0.24	0.2	0.566	14.29	13.3	1.09	2	0	0.00432	0.566	1
TSC1	1009	4597	81	5527	14	65	0	-0.85	0.73	0.566	17.28	18	0.98	8	15	0.0118	0.566	1
CDC42BPA	1845	7066	14	8897	3	11	0	-0.21	0.21	0.566	21.43	20.7	1.04	1	1	0.414	0.566	1
FITM1	1047	7861	7	8901	1	6	0	-0.22	0.11	0.567	14.29	11.75	1.25	1	1	0.383	0.567	1
NKG7	1023	7881	7	8897	1	6	0	-0.22	0.11	0.568	14.29	11.49	1.28	1	1	0.383	0.568	1
APEX1	1645	7134	27	8752	5	22	0	-0.3	0.26	0.568	18.52	18.74	0.99	2	3	0.229	0.568	1
SYNE2	2176	6732	43	8865	12	31	0.12	-0.24	0.43	0.343	27.91	24.41	1.2	4	9	0.57	0.57	1
CCDC146	985	7906	23	8868	5	18	0.34	-0.11	0.57	0.105	21.74	11.05	2.23	1	2	0.571	0.571	1
FBXL6	956	6282	14	7224	2	12	0	-0.3	0.24	0.571	14.29	13.21	1.1	1	2	0.473	0.571	1
MANBA	1243	7652	65	8830	9	56	0	-0.56	0.47	0.572	13.85	13.98	0.99	5	10	0.0235	0.572	1
EXOSC3	1552	6890	16	8426	3	13	0	-0.24	0.24	0.572	18.75	18.38	1.02	2	1	0.0594	0.572	1
PBRM1	1769	5444	13	7200	4	9	0.07	-0.15	0.26	0.381	30.77	24.51	1.37	2	3	0.572	0.572	1
C1orf177	1207	7702	6	8903	1	5	0	-0.19	0.1	0.573	16.67	13.55	1.28	1	1	0.438	0.573	1
EIF2B1	1291	7617	23	8886	3	19	0	-0.27	0.27	0.573	13.04	14.49	0.93	2	1	0.0305	0.573	1
LRP5L	921	7104	64	7962	12	51	0.61	-0.06	1.1	0.0553	18.75	11.42	1.81	4	15	0.573	0.573	1
PFKL	1238	7219	41	8416	6	35	0	-0.47	0.38	0.573	14.63	14.64	1	3	7	0.163	0.573	1
IGSF10	1112	7679	55	8737	11	43	0.41	-0.1	0.88	0.0677	20	12.6	1.77	3	10	0.573	0.573	1
KLK7	1031	7868	17	8884	3	12	0.22	-0.11	0.33	0.215	17.65	11.57	1.91	1	2	0.574	0.574	1
PHLDB2	1100	7809	16	8894	2	13	0	-0.31	0.21	0.574	12.5	12.35	1.09	2	1	0.032	0.574	1
KANK1	2288	6617	34	8871	9	25	0	-0.32	0.29	0.574	26.47	25.69	1.04	5	4	0.0181	0.574	1
GRM7	1768	7076	38	8807	7	30	0	-0.35	0.28	0.574	18.42	20	0.93	6	6	0.0016	0.574	1
KIAA0319	1637	7270	10	8897	2	8	0	-0.19	0.15	0.575	20	18.38	1.11	2	2	0.189	0.575	1
PCDH15	2185	6724	27	8882	9	18	0.12	-0.15	0.36	0.224	33.33	24.5	1.54	2	3	0.575	0.575	1
ADAM9	1148	7397	6	8539	1	5	0	-0.2	0.1	0.576	16.67	13.43	1.29	1	1	0.438	0.576	1
LRIT3	950	7956	7	8899	1	6	0	-0.24	0.12	0.577	14.29	10.66	1.4	1	1	0.383	0.577	1
PRPF4	1043	5112	7	6148	2	5	0.12	-0.12	0.23	0.342	28.57	16.93	1.96	1	1	0.578	0.578	1
ASB8	1076	7502	7	8571	2	5	0.11	-0.11	0.21	0.218	28.57	12.53	2.79	1	1	0.578	0.578	1
PCDHA13	1269	7627	8	8889	2	5	0.09	-0.09	0.18	0.27	25	14.25	2.4	1	1	0.578	0.578	1
CYP2E1	1113	7793	11	8895	2	9	0.1	-0.21	0.21	0.454	18.18	12.49	1.56	1	2	0.578	0.578	1
PIGZ	1418	7276	7	8687	2	5	0.08	-0.08	0.17	0.322	28.57	16.3	2.05	1	1	0.578	0.578	1
CD151	1349	7411	7	8753	2	5	0.09	-0.09	0.18	0.328	28.57	15.39	2.2	1	1	0.578	0.578	1
CTSF	1058	7842	11	8889	2	9	0.11	-0.21	0.21	0.375	18.18	11.88	1.65	1	2	0.578	0.578	1
CCDC81	1312	7396	7	8701	2	5	0.09	-0.09	0.18	0.284	28.57	15.06	2.25	1	1	0.578	0.578	1
SPRR1A	948	6837	7	7778	2	5	0.12	-0.12	0.24	0.226	28.57	12.16	2.88	1	1	0.578	0.578	1
MIA2	934	7903	16	8822	2	13	0.12	-0.24	0.24	0.455	12.5	10.56	1.3	1	3	0.578	0.578	1
C10orf53	1314	7592	7	8899	2	5	0.09	-0.09	0.18	0.268	28.57	14.74	2.31	1	1	0.578	0.578	1
CHKB	1323	7194	7	8510	2	5	0.09	-0.09	0.18	0.291	28.57	15.52	2.18	1	1	0.578	0.578	1
GPR142	1535	7364	7	8892	2	5	0.08	-0.12	0.16	0.361	28.57	17.24	1.92	1	1	0.578	0.578	1
LRP1B	2419	6490	336	8577	89	243	-0.06	-0.96	0.82	0.578	26.49	27.17	0.98	34	45	1.68e-05	0.578	1
IL20	945	7776	20	8701	3	17	0.12	-0.24	0.36	0.347	15	10.83	1.45	1	3	0.579	0.579	1
C1QTNF9	1401	7507	12	8896	2	10	0	-0.21	0.17	0.579	16.67	15.73	1.07	1	1	0.356	0.579	1
MTOR	1328	7581	13	8896	2	11	0	-0.22	0.18	0.579	15.38	14.91	1.04	2	1	0.043	0.579	1
LHX3	1108	5918	5	7021	1	4	0	-0.21	0.11	0.58	20	15.77	1.34	1	1	0.51	0.58	1
SLC4A1	1242	6369	44	7567	7	37	0	-0.48	0.38	0.58	15.91	16.32	0.97	5	7	0.00982	0.58	1
KIAA1217	1676	7174	11	8840	2	8	0	-0.18	0.15	0.582	18.18	18.94	1.07	1	1	0.421	0.582	1
NT5DC2	2394	6495	7	8882	2	5	0	-0.11	0.11	0.582	28.57	26.93	1.09	2	1	0.156	0.582	1
TRAP1	1156	7736	31	8861	4	27	0	-0.4	0.3	0.582	12.9	13	0.99	3	8	0.168	0.582	1
MADD	1390	7518	12	8896	2	10	0	-0.21	0.17	0.583	16.67	15.6	1.08	1	1	0.356	0.583	1
PRDM5	1117	6972	14	8075	2	12	0	-0.31	0.21	0.583	14.29	13.81	1.04	1	1	0.308	0.583	1
APC	1579	6991	172	8401	30	139	-0.08	-0.82	0.66	0.583	17.44	18.44	0.96	19	27	4.45e-07	0.583	1
ATP2A1	1292	7615	93	8814	13	80	0	-0.68	0.54	0.585	13.98	14.51	0.96	8	10	0.000115	0.585	1
CLCN1	1361	7540	89	8812	13	76	0	-0.65	0.52	0.585	14.61	15.3	0.95	7	18	0.0312	0.585	1
FOXN4	1064	7786	33	8817	4	29	0	-0.43	0.32	0.585	12.12	12.02	1.01	2	8	0.437	0.585	1
ALPK2	2787	6121	19	8889	6	13	0	-0.21	0.21	0.585	31.58	31.29	1.01	4	2	0.0225	0.585	1
FSCN3	1080	7748	16	8812	2	14	0	-0.32	0.21	0.586	12.5	12.23	1.02	1	1	0.271	0.586	1
DISC1	1056	6910	14	7952	2	12	0	-0.33	0.22	0.587	14.29	13.25	1.09	2	2	0.0967	0.587	1
HDAC4	975	7867	7	8835	1	6	0	-0.23	0.12	0.573	14.29	11.02	1.34	1	2	0.587	0.587	1
SH2D4A	1524	6225	35	7715	7	27	0	-0.41	0.33	0.575	20	19.66	1.06	2	6	0.587	0.587	1
DMD	1234	7665	36	8863	5	31	0	-0.42	0.33	0.588	13.89	13.87	1	4	2	0.000491	0.588	1
BZRAP1	2100	6771	10	8861	3	7	0.06	-0.12	0.19	0.435	30	23.67	1.38	2	3	0.588	0.588	1
UMOD	1106	7682	41	8748	5	35	0	-0.47	0.36	0.59	12.2	12.59	0.99	3	14	0.461	0.59	1
VSX2	1267	7640	21	8886	7	14	0.37	0.05	0.64	0.0215	33.33	14.18	3.01	2	3	0.59	0.59	1
SLC11A1	1303	7605	63	8846	9	53	0	-0.54	0.45	0.591	14.29	14.63	0.99	6	6	0.000414	0.591	1
ROR2	1478	7421	31	8868	5	26	0	-0.37	0.28	0.591	16.13	16.61	0.97	2	2	0.1	0.591	1
ITGAE	3386	5522	56	8852	21	35	0	-0.36	0.31	0.592	37.5	38.01	0.98	10	6	0.00283	0.592	1
FN3K	1221	7683	6	8898	1	5	0	-0.19	0.09	0.592	16.67	13.71	1.26	1	1	0.438	0.592	1
KLK9	1178	7659	22	8815	3	19	0	-0.34	0.29	0.592	13.64	13.33	1.03	2	3	0.144	0.592	1
DNAH2	4007	4901	75	8833	33	42	0	-0.41	0.34	0.592	44	44.99	0.96	9	8	0.216	0.592	1
IRF9	1347	7560	33	8874	5	28	0	-0.39	0.31	0.592	15.15	15.12	1	3	5	0.0866	0.592	1
GBP1	1319	7400	35	8685	5	29	0	-0.4	0.31	0.593	14.29	15.13	0.97	5	5	0.00105	0.593	1
GABBR2	1869	6995	14	8851	4	9	0.07	-0.14	0.27	0.306	28.57	21.07	1.66	3	5	0.593	0.593	1
CLCNKA	1637	6414	45	8006	9	36	0	-0.46	0.38	0.594	20	20.33	0.98	5	7	0.0346	0.594	1
GEN1	1076	7831	16	8891	2	14	0	-0.32	0.21	0.594	12.5	12.08	1.04	2	6	0.401	0.594	1
KRT6B	1164	7010	58	8118	8	48	0	-0.55	0.45	0.594	13.79	14.24	1	4	5	0.0125	0.594	1
ENTPD7	1085	7681	7	8759	1	6	0	-0.21	0.11	0.594	14.29	12.38	1.18	1	1	0.383	0.594	1
SMCR8	2793	6078	10	8861	3	7	0	-0.16	0.16	0.595	30	31.49	0.93	1	1	0.564	0.595	1
AGL	1662	6880	111	8431	21	90	-0.07	-0.67	0.56	0.596	18.92	19.46	0.97	13	14	5.05e-06	0.596	1
ATP10D	1316	7588	71	8834	10	60	0	-0.58	0.45	0.596	14.08	14.78	0.96	6	17	0.0643	0.596	1
RAP1GAP	1671	7149	21	8799	4	17	0	-0.3	0.22	0.597	19.05	18.95	1.01	3	5	0.171	0.597	1
PAX4	1076	7753	60	8769	7	53	0	-0.58	0.42	0.598	11.67	12.19	0.95	4	10	0.0513	0.598	1
KRT85	1481	7190	32	8640	5	26	0	-0.37	0.29	0.598	15.62	17.08	0.93	2	2	0.1	0.598	1
CHRNE	1468	6391	33	7826	8	25	0.17	-0.25	0.5	0.281	24.24	18.66	1.39	2	5	0.598	0.598	1
ENPP2	1378	7531	19	8891	4	14	0.09	-0.17	0.34	0.307	21.05	15.45	1.56	1	2	0.598	0.598	1
SLC25A38	1270	7552	33	8789	6	27	0.09	-0.28	0.46	0.354	18.18	14.38	1.32	2	7	0.598	0.598	1
TNNT2	1969	6940	44	8866	9	34	0	-0.39	0.33	0.599	20.45	22.11	0.93	3	6	0.28	0.599	1
PROZ	1626	7282	57	8851	10	47	0	-0.49	0.38	0.6	17.54	18.26	0.95	3	9	0.376	0.6	1
SVIL	2297	6614	16	8895	4	12	0	-0.21	0.18	0.6	25	25.78	0.96	2	1	0.105	0.6	1
HAMP	1263	7543	6	8800	1	5	0	-0.18	0.09	0.6	16.67	14.34	1.19	1	1	0.438	0.6	1
HRNR	1323	7582	48	8857	9	39	0.27	-0.18	0.62	0.173	18.75	14.84	1.32	1	3	0.6	0.6	1
RARS2	1306	6083	17	7372	3	14	0	-0.33	0.28	0.601	17.65	17.67	1	2	2	0.132	0.601	1
OXA1L	1561	7344	5	8900	1	4	0	-0.16	0.08	0.601	20	17.53	1.18	1	1	0.51	0.601	1
JAK2	1361	5967	51	7278	9	41	0	-0.54	0.45	0.602	17.65	18.58	0.96	5	8	0.0344	0.602	1
NDUFB1	1207	6055	19	7243	3	16	0	-0.35	0.3	0.6	15.79	16.62	0.94	1	3	0.602	0.602	1
SGOL1	1036	6798	6	7828	1	5	0	-0.22	0.11	0.602	16.67	13.22	1.31	1	1	0.438	0.602	1
SLC15A3	909	7981	8	8882	1	7	0	-0.25	0.12	0.603	12.5	10.22	1.25	1	1	0.34	0.603	1
PCDHA10	1168	7699	15	8852	2	13	0	-0.3	0.2	0.603	13.33	13.17	1.01	1	1	0.288	0.603	1
AACS	884	7042	18	7909	2	15	0	-0.38	0.25	0.604	11.11	11.15	1.06	1	3	0.523	0.604	1
WNT2B	936	7965	8	8893	1	7	0	-0.24	0.12	0.604	12.5	10.51	1.22	1	1	0.34	0.604	1
MIOX	1655	7141	12	8785	2	9	0	-0.19	0.15	0.605	16.67	18.82	0.96	2	1	0.0607	0.605	1
APLP1	1173	7732	43	8866	5	34	0	-0.44	0.34	0.605	11.63	13.17	0.97	3	10	0.256	0.605	1
GJA9	1274	7244	60	8462	8	48	0	-0.55	0.42	0.606	13.33	14.96	0.95	5	7	0.00616	0.606	1
WNK1	1380	7528	20	8888	3	17	0	-0.3	0.26	0.606	15	15.49	0.96	3	1	0.00217	0.606	1
ITGB3	1128	4716	79	5768	15	61	0	-0.82	0.66	0.606	18.99	19.3	1.03	10	10	5.72e-05	0.606	1
CD320	937	5714	14	6637	3	11	0.12	-0.25	0.37	0.323	21.43	14.07	1.66	1	2	0.607	0.607	1
CIDEC	1908	6916	15	8810	3	11	0	-0.2	0.2	0.527	20	21.62	0.99	1	2	0.607	0.607	1
RNF123	2476	6427	14	8889	4	10	0	-0.2	0.17	0.608	28.57	27.81	1.04	2	2	0.319	0.608	1
NRXN3	1071	6736	38	7769	5	33	0	-0.49	0.38	0.608	13.16	13.72	0.95	2	6	0.323	0.608	1
CDC42BPG	1184	7724	33	8876	7	25	0.29	-0.1	0.58	0.0993	21.21	13.26	1.83	3	9	0.608	0.608	1
ANKMY1	1585	7180	21	8744	4	17	0	-0.31	0.23	0.608	19.05	18.08	1.07	1	2	0.527	0.608	1
ZUFSP	1326	6389	4	7711	1	3	0	-0.09	0.09	0.522	25	17.18	1.61	1	1	0.609	0.609	1
PDK2	1368	7532	4	8896	1	3	0.09	-0.09	0.09	0.485	25	15.37	1.84	1	1	0.609	0.609	1
ATG2B	1348	7537	4	8881	1	3	0.09	-0.09	0.09	0.495	25	15.17	1.86	1	1	0.609	0.609	1
MAGOHB	1182	7725	4	8903	1	3	0.1	-0.1	0.1	0.449	25	13.27	2.18	1	1	0.609	0.609	1
CDHR5	1456	7250	12	8694	2	10	0	-0.25	0.16	0.609	16.67	16.72	1	2	1	0.0507	0.609	1
SALL2	1847	7060	5	8903	1	3	0	-0.1	0.07	0.591	20	20.73	1.27	1	1	0.609	0.609	1
PITPNM3	1882	7010	4	8888	1	3	0	-0.1	0.07	0.6	25	21.16	1.24	1	1	0.609	0.609	1
PLA2G2D	1048	7378	4	8422	1	3	0.11	-0.11	0.11	0.421	25	12.43	2.35	1	1	0.609	0.609	1
C19orf54	1111	7673	12	8772	3	9	0.21	-0.1	0.31	0.203	25	12.63	2.3	2	4	0.609	0.609	1
ZWILCH	1277	7630	4	8903	1	3	0.09	-0.09	0.09	0.432	25	14.33	1.99	1	1	0.609	0.609	1
PDGFD	1221	7272	4	8489	1	3	0.1	-0.1	0.1	0.476	25	14.37	1.99	1	1	0.609	0.609	1
VAV3	1425	7478	19	8884	3	16	0	-0.29	0.25	0.61	15.79	16.01	0.98	2	3	0.19	0.61	1
SLC5A4	928	5900	62	6766	8	54	0	-0.75	0.56	0.61	12.9	13.6	0.94	6	9	0.00138	0.61	1
SIAE	939	5531	71	6399	10	61	0	-0.81	0.62	0.61	14.08	14.52	0.97	7	9	0.000369	0.61	1
COL27A1	2857	6052	149	8762	46	101	-0.05	-0.64	0.49	0.611	30.87	32.08	0.96	24	26	0.000207	0.611	1
DGKH	2255	6652	49	8860	15	32	0.18	-0.15	0.53	0.171	30.61	25.28	1.38	5	10	0.612	0.612	1
TBX4	1161	6602	29	7735	4	24	0	-0.41	0.3	0.612	13.79	14.96	0.95	2	7	0.472	0.612	1
SLC25A35	3641	5261	14	8888	6	8	0	-0.19	0.16	0.612	42.86	40.9	1.08	3	0	0.00507	0.612	1
KRT16	1637	7271	33	8875	6	27	0	-0.37	0.3	0.613	18.18	18.38	0.99	2	2	0.124	0.613	1
SERINC4	1094	7786	7	8873	1	6	0	-0.21	0.1	0.613	14.29	12.32	1.19	1	2	0.587	0.613	1
LRRC27	1100	7340	15	8425	2	13	0	-0.31	0.21	0.613	13.33	13.03	1.03	1	3	0.578	0.613	1
TGM1	1285	7622	42	8865	8	34	0.18	-0.27	0.55	0.265	19.05	14.4	1.4	1	3	0.613	0.613	1
ERAP1	2655	6143	17	8781	5	12	0	-0.22	0.16	0.613	29.41	30.18	0.96	3	1	0.0235	0.613	1
PDHX	1117	7550	7	8660	1	6	0	-0.21	0.1	0.613	14.29	12.89	1.13	1	1	0.383	0.613	1
ESPL1	1075	7834	17	8892	2	15	0	-0.32	0.21	0.615	11.76	12.07	0.97	1	3	0.523	0.615	1
SGCA	1942	6966	33	8876	7	25	0	-0.33	0.26	0.616	21.21	21.8	1	3	4	0.147	0.616	1
EPX	1344	5957	87	7214	15	72	-0.09	-0.73	0.55	0.616	17.24	18.42	0.92	6	10	0.0194	0.616	1
TPP1	2433	6476	73	8837	19	53	-0.06	-0.48	0.37	0.616	26.03	27.32	0.95	13	7	2.12e-07	0.616	1
ALDH16A1	1363	7300	15	8648	5	10	0.26	-0.04	0.44	0.0773	33.33	15.7	2.68	2	3	0.618	0.618	1
HHATL	1736	6720	15	8441	5	10	0.14	-0.07	0.36	0.157	33.33	20.51	1.94	2	3	0.618	0.618	1
ZBTB25	1010	7895	8	8897	1	7	0	-0.22	0.11	0.618	12.5	11.34	1.12	1	2	0.527	0.618	1
PLEKHG4	1035	5957	15	6977	5	10	0.34	0	0.57	0.0541	33.33	14.76	2.88	2	3	0.618	0.618	1
CELSR1	1578	7272	51	8800	11	39	0.15	-0.23	0.54	0.241	21.57	17.81	1.3	4	13	0.619	0.619	1
SLC35B4	978	5634	9	6603	3	6	0.24	-0.12	0.36	0.139	33.33	14.77	2.88	1	1	0.619	0.619	1
ANPEP	1665	7070	7	8728	4	3	0.22	0.04	0.3	0.0282	57.14	19.03	5.66	2	1	0.619	0.619	1
EPHA2	1277	5380	9	6648	3	6	0.1	-0.1	0.29	0.228	33.33	19.16	2.11	1	1	0.619	0.619	1
ASPM	1655	7254	90	8819	16	74	-0.07	-0.63	0.45	0.619	17.78	18.58	0.95	11	13	2.71e-05	0.619	1
TRMU	1467	7429	12	8884	2	10	0	-0.24	0.16	0.62	16.67	16.49	1.01	2	1	0.0507	0.62	1
MOV10	1461	7447	25	8883	4	21	0	-0.33	0.25	0.621	16	16.4	0.97	3	4	0.0615	0.621	1
CGB7	1252	6987	6	8233	1	5	0	-0.19	0.09	0.621	16.67	15.19	1.12	1	1	0.438	0.621	1
UTRN	2279	6264	60	8484	15	44	-0.06	-0.45	0.33	0.622	25	26.69	0.94	4	10	0.533	0.622	1
FANK1	944	7964	29	8879	3	26	0	-0.47	0.36	0.622	10.34	10.6	0.97	1	3	0.426	0.622	1
SPAG1	1189	6612	22	7780	3	18	0	-0.35	0.3	0.622	13.64	15.24	0.93	3	6	0.119	0.622	1
GOLGB1	1373	7309	14	8668	6	8	0.35	0.09	0.52	0.0164	42.86	15.77	3.99	2	2	0.622	0.622	1
SPNS3	2808	5930	6	8732	2	4	0	-0.1	0.1	0.623	33.33	32.13	1.06	2	1	0.216	0.623	1
ZNF614	1127	5373	10	6490	2	8	0	-0.21	0.21	0.538	20	17.33	1.19	1	2	0.623	0.623	1
GPR1	940	5663	10	6593	2	8	0.12	-0.25	0.25	0.418	20	14.23	1.51	1	2	0.623	0.623	1
ANO9	1591	7127	10	8708	2	8	0	-0.19	0.15	0.58	20	18.25	1.12	1	2	0.623	0.623	1
INPP5A	1107	5649	10	6746	2	8	0	-0.22	0.22	0.507	20	16.38	1.28	1	2	0.623	0.623	1
SPICE1	1005	5714	10	6709	2	8	0.12	-0.23	0.23	0.458	20	14.95	1.42	1	2	0.623	0.623	1
NHLRC2	1018	7433	10	8441	2	8	0.11	-0.17	0.22	0.363	20	12.04	1.83	1	2	0.623	0.623	1
ASPH	914	7995	10	8899	2	8	0.12	-0.12	0.24	0.262	20	10.25	2.19	1	2	0.623	0.623	1
MMRN2	1564	7337	8	8894	2	5	0.08	-0.08	0.16	0.342	25	17.56	1.88	2	3	0.624	0.624	1
ACTN4	1117	7320	8	8430	1	6	0	-0.21	0.1	0.624	12.5	13.24	1.09	1	1	0.383	0.624	1
SLC12A7	1122	7697	66	8753	16	50	0.82	0.2	1.28	0.00745	24.24	12.64	2.2	5	15	0.625	0.625	1
LRP1	1438	7469	218	8690	34	183	-0.08	-1.04	0.7	0.625	15.6	16.16	0.97	19	35	4.28e-06	0.625	1
KCNH1	1039	7592	73	8558	8	65	0	-0.66	0.49	0.626	10.96	12.05	0.9	4	12	0.0723	0.626	1
NOL12	1561	7245	17	8789	4	13	0.08	-0.16	0.31	0.34	23.53	17.72	1.43	1	2	0.626	0.626	1
NDUFB8	1158	4081	4	5235	1	3	0	-0.22	0.11	0.626	25	22.1	1.17	1	1	0.609	0.626	1
NBAS	1677	7228	17	8888	4	13	0.07	-0.18	0.29	0.384	23.53	18.82	1.33	1	2	0.626	0.626	1
F2	1006	7902	28	8880	3	25	0	-0.45	0.34	0.626	10.71	11.3	0.94	2	5	0.199	0.626	1
CSF1R	1864	6920	15	8769	3	12	0	-0.24	0.2	0.628	20	21.22	0.93	2	2	0.169	0.628	1
PLEKHA1	1048	7634	16	8666	2	14	0	-0.33	0.22	0.628	12.5	12.07	1.04	1	2	0.421	0.628	1
KIF19	2079	6826	18	8887	4	14	0	-0.25	0.19	0.628	22.22	23.35	0.94	3	0	0.000352	0.628	1
MCF2L	1566	7297	24	8839	4	20	0	-0.31	0.23	0.629	16.67	17.67	0.93	2	4	0.292	0.629	1
WDR78	1200	7706	27	8879	5	22	0.19	-0.24	0.43	0.287	18.52	13.46	1.46	1	3	0.629	0.629	1
CHMP4A	1065	7830	16	8879	2	14	0	-0.32	0.21	0.629	12.5	11.97	1.05	1	1	0.271	0.629	1
RXRG	1141	7767	18	8890	7	11	0.5	0.15	0.7	0.00543	38.89	12.76	4.33	3	4	0.63	0.63	1
DCST2	1425	7478	19	8884	3	16	0	-0.29	0.25	0.631	15.79	16.01	0.98	2	3	0.19	0.631	1
C9orf131	1862	7043	16	8889	7	9	0.27	0.03	0.44	0.0295	43.75	20.87	2.94	2	2	0.633	0.633	1
MAP3K9	1366	7490	41	8816	7	33	0.09	-0.35	0.43	0.411	17.07	15.42	1.16	2	8	0.633	0.633	1
AASDH	1067	6873	28	7913	5	22	0.22	-0.27	0.49	0.283	17.86	13.42	1.46	2	7	0.634	0.634	1
KRT71	1445	7454	58	8844	9	46	0	-0.45	0.41	0.569	15.52	16.24	1.01	1	4	0.634	0.634	1
TMEM8A	1341	7142	13	8470	2	11	0	-0.27	0.18	0.634	15.38	15.81	0.97	1	1	0.33	0.634	1
FDFT1	2846	6063	21	8890	6	13	0	-0.23	0.18	0.636	28.57	31.95	0.98	3	1	0.0309	0.636	1
DSG4	1153	7669	44	8780	5	37	0	-0.5	0.35	0.636	11.36	13.08	0.9	4	4	0.00242	0.636	1
GAMT	1230	7438	15	8653	2	13	0	-0.28	0.19	0.638	13.33	14.19	0.93	2	3	0.156	0.638	1
FLNB	2185	6258	247	8198	60	185	-0.12	-0.96	0.68	0.638	24.29	25.92	0.93	24	45	0.00716	0.638	1
LAMA2	2393	6517	72	8840	18	52	-0.06	-0.49	0.34	0.638	25	26.87	0.94	9	10	0.00624	0.638	1
OR51G2	1347	7562	14	8895	2	12	0	-0.26	0.17	0.639	14.29	15.12	0.94	2	3	0.178	0.639	1
HARS	1235	7661	17	8879	8	9	0.56	0.24	0.75	0.00112	47.06	13.82	5.51	4	4	0.639	0.639	1
ADAM19	1060	5989	22	7027	4	18	0.11	-0.33	0.39	0.428	18.18	15.03	1.26	1	3	0.639	0.639	1
SLC22A14	1463	7446	18	8891	3	15	0	-0.29	0.2	0.64	16.67	16.42	1.02	3	3	0.035	0.64	1
NOS2	1219	6926	14	8131	2	12	0	-0.29	0.19	0.64	14.29	14.97	0.95	2	2	0.0967	0.64	1
KLF17	1059	7626	8	8677	1	7	0	-0.22	0.11	0.641	12.5	12.19	1.03	1	2	0.527	0.641	1
ARHGEF15	3052	5833	9	8876	3	6	0	-0.15	0.12	0.641	33.33	34.35	0.96	2	2	0.45	0.641	1
GPR151	970	7917	19	8868	2	17	0	-0.35	0.23	0.641	10.53	10.92	0.96	2	4	0.156	0.641	1
CLIP4	1118	7790	16	8892	2	14	0	-0.31	0.2	0.642	12.5	12.55	1	1	2	0.421	0.642	1
HHAT	1040	7838	8	8870	1	7	0	-0.22	0.11	0.642	12.5	11.71	1.08	1	2	0.527	0.642	1
PTK2B	2643	6165	25	8783	9	16	0.05	-0.19	0.3	0.349	36	29.99	1.31	2	3	0.642	0.642	1
EXD1	1078	7830	8	8900	1	7	0	-0.21	0.11	0.642	12.5	12.1	1.04	1	1	0.34	0.642	1
NLRP3	1854	7055	32	8878	6	25	0	-0.34	0.27	0.642	18.75	20.82	0.91	3	7	0.327	0.642	1
ADAMTS6	958	7506	9	8455	1	8	0	-0.24	0.12	0.643	11.11	11.32	0.98	1	2	0.478	0.643	1
DHX58	1295	6119	20	7395	3	16	0	-0.33	0.23	0.644	15	17.47	0.89	2	4	0.287	0.644	1
UBE2O	1106	7787	26	8868	3	22	0	-0.41	0.31	0.644	11.54	12.44	0.96	3	3	0.0125	0.644	1
ITIH1	2064	5566	24	7606	6	18	0	-0.33	0.23	0.644	25	27.06	0.9	4	4	0.059	0.644	1
APOA1	1186	7628	13	8801	2	11	0	-0.19	0.19	0.521	15.38	13.45	1.17	1	3	0.645	0.645	1
ODAM	1102	6507	14	7596	2	11	0	-0.32	0.21	0.593	14.29	14.48	1.07	1	3	0.645	0.645	1
STAC2	1011	7701	13	8699	2	11	0.11	-0.22	0.22	0.44	15.38	11.6	1.38	1	3	0.645	0.645	1
GFM1	1138	6090	41	7187	6	35	0	-0.57	0.42	0.645	14.63	15.75	0.92	2	2	0.0801	0.645	1
FKBP10	1467	7422	25	8864	4	21	0	-0.33	0.24	0.646	16	16.5	0.96	2	5	0.367	0.646	1
FCRL4	1152	7329	11	8470	4	7	0.3	0	0.4	0.0532	36.36	13.55	3.64	1	1	0.646	0.646	1
HHIPL2	1859	7045	24	8880	5	19	0	-0.31	0.2	0.646	20.83	20.88	1	2	3	0.283	0.646	1
PRPSAP1	1656	4935	25	6566	6	19	0	-0.4	0.28	0.646	24	25.13	0.94	4	5	0.096	0.646	1
TPO	1450	7425	40	8836	6	33	0	-0.45	0.33	0.647	15	16.34	0.93	3	10	0.373	0.647	1
KRT5	1816	7093	53	8856	10	43	-0.07	-0.45	0.31	0.648	18.87	20.39	0.91	7	8	0.00159	0.648	1
PDLIM7	1324	7581	30	8875	4	26	0	-0.4	0.27	0.649	13.33	14.87	0.88	2	5	0.27	0.649	1
BIN2	1155	7734	27	8864	3	22	0	-0.4	0.3	0.65	11.11	13	0.91	2	6	0.318	0.65	1
COL10A1	1312	7583	43	8853	10	32	0.36	-0.09	0.72	0.0849	23.26	14.71	1.81	4	12	0.651	0.651	1
SIRT3	1741	6761	16	8486	3	13	0	-0.25	0.18	0.653	18.75	20.48	0.9	3	0	0.000177	0.653	1
HLA-C	1688	6962	11	8639	2	9	0	-0.22	0.15	0.653	18.18	19.52	0.92	2	1	0.0607	0.653	1
PIK3C2A	1022	7887	30	8880	3	26	0	-0.44	0.33	0.653	10	11.48	0.89	2	4	0.132	0.653	1
TCTN3	1410	7330	17	8723	3	14	0.08	-0.21	0.25	0.461	17.65	16.13	1.11	1	3	0.655	0.655	1
SH3BP2	948	7362	34	8276	6	28	0.24	-0.24	0.6	0.185	17.65	11.38	1.66	2	8	0.656	0.656	1
WBP11	1199	6705	14	7890	2	12	0	-0.29	0.2	0.656	14.29	15.17	0.93	1	1	0.308	0.656	1
AMPD2	1679	7230	12	8898	5	6	0.22	0	0.37	0.0363	41.67	18.81	3.59	3	3	0.656	0.656	1
LRCH1	1627	7281	6	8902	2	4	0.08	-0.08	0.15	0.296	33.33	18.25	2.24	1	1	0.657	0.657	1
POLRMT	1807	6967	6	8768	2	4	0.07	-0.1	0.14	0.433	33.33	20.59	1.93	1	1	0.657	0.657	1
CSGALNACT1	1331	7302	7	8627	2	4	0.09	-0.09	0.18	0.23	28.57	15.41	2.74	1	1	0.657	0.657	1
TIAM1	1330	7530	6	8854	2	4	0.09	-0.09	0.18	0.219	33.33	15	2.83	1	1	0.657	0.657	1
SPAG8	969	3804	6	4767	2	4	0.13	-0.13	0.26	0.358	33.33	20.29	1.96	1	1	0.657	0.657	1
FUT11	967	7498	6	8459	2	4	0.12	-0.06	0.23	0.158	33.33	11.41	3.88	1	1	0.657	0.657	1
USP4	1280	7080	14	8346	2	12	0	-0.28	0.18	0.657	14.29	15.31	0.92	1	2	0.473	0.657	1
SLC25A22	1676	7136	6	8806	2	4	0.07	-0.11	0.15	0.401	33.33	19.01	2.13	1	1	0.657	0.657	1
COL1A2	1262	7287	99	8453	13	83	-0.09	-0.74	0.51	0.658	13.13	14.78	0.9	6	14	0.0225	0.658	1
KCNAB3	1616	7114	22	8709	4	17	0	-0.3	0.23	0.658	18.18	18.51	1.04	4	4	0.0156	0.658	1
PFKFB4	1219	7585	24	8780	3	21	0	-0.38	0.24	0.658	12.5	13.85	0.89	1	4	0.6	0.658	1
ATRNL1	1132	7777	6	8903	1	5	0	-0.2	0.1	0.568	16.67	12.7	1.37	1	2	0.66	0.66	1
KCNQ4	953	7739	21	8672	2	18	0	-0.35	0.24	0.66	9.52	10.97	0.9	1	4	0.556	0.66	1
S100A1	988	7872	6	8854	1	5	0.11	-0.11	0.11	0.469	16.67	11.15	1.59	1	2	0.66	0.66	1
CDX2	935	7865	6	8794	1	5	0.12	-0.12	0.12	0.454	16.67	10.62	1.68	1	2	0.66	0.66	1
GABRD	1287	7362	6	8643	1	5	0	-0.18	0.09	0.61	16.67	14.88	1.14	1	2	0.66	0.66	1
WDR61	1004	7904	6	8902	1	5	0	-0.17	0.11	0.512	16.67	11.27	1.57	1	2	0.66	0.66	1
RAF1	1244	7193	6	8431	1	5	0	-0.19	0.09	0.602	16.67	14.74	1.16	1	2	0.66	0.66	1
REEP5	1194	7649	7	8837	1	5	0	-0.19	0.1	0.566	14.29	13.5	1.28	1	2	0.66	0.66	1
SSRP1	1180	7727	25	8882	3	22	0	-0.39	0.24	0.66	12	13.25	0.89	1	3	0.483	0.66	1
ABCD4	1272	7635	50	8857	7	43	-0.09	-0.55	0.37	0.661	14	14.28	0.98	2	5	0.264	0.661	1
POLR3A	898	7430	22	8307	4	17	0.25	-0.12	0.5	0.156	18.18	10.76	1.95	1	3	0.661	0.661	1
SEC14L4	997	4849	21	5825	4	17	0	-0.42	0.36	0.523	19.05	17.05	1.14	1	3	0.661	0.661	1
POLN	897	4616	63	5451	9	53	-0.13	-0.87	0.6	0.661	14.29	16.29	0.87	7	14	0.00543	0.661	1
COL5A3	2690	6218	154	8759	43	106	-0.11	-0.67	0.45	0.662	27.92	30.22	0.94	16	17	0.00107	0.662	1
FHL5	1239	6956	23	8173	3	19	0	-0.38	0.24	0.663	13.04	15.12	0.89	3	3	0.0186	0.663	1
RAB17	1220	5998	10	7208	2	8	0	-0.2	0.2	0.51	20	16.9	1.23	2	5	0.664	0.664	1
EWSR1	1410	7476	25	8861	5	20	0.08	-0.25	0.34	0.358	20	15.86	1.33	1	3	0.665	0.665	1
SPINK4	898	8010	10	8898	1	9	0	-0.25	0.12	0.665	10	10.08	0.99	1	1	0.278	0.665	1
ACAT2	2542	6350	13	8879	5	8	0.06	-0.11	0.22	0.328	38.46	28.57	1.56	1	1	0.665	0.665	1
ELAC2	1868	3182	30	5021	10	19	-0.08	-0.51	0.34	0.665	33.33	37	0.9	3	3	0.3	0.665	1
NSMAF	1232	7676	38	8871	5	32	0	-0.42	0.38	0.564	13.16	13.83	0.97	1	5	0.665	0.665	1
LIM2	1028	7876	25	8879	5	20	0.22	-0.16	0.55	0.179	20	11.52	1.92	1	3	0.665	0.665	1
CORIN	1180	7706	116	8770	14	102	-0.1	-0.83	0.54	0.665	12.07	13.3	0.9	4	16	0.21	0.665	1
CNOT10	1208	7613	13	8808	5	8	0.29	0.05	0.48	0.0239	38.46	13.66	3.94	1	1	0.665	0.665	1
LIG1	1297	6323	25	7595	5	20	0.09	-0.28	0.37	0.409	20	17.01	1.22	1	3	0.665	0.665	1
PPAP2C	1412	6961	23	8350	5	18	0.09	-0.21	0.34	0.328	21.74	16.85	1.37	2	6	0.666	0.666	1
HMBS	2215	6693	33	8875	12	21	0.24	-0.09	0.51	0.0943	36.36	24.82	1.73	3	5	0.667	0.667	1
DOCK7	1066	7843	8	8901	1	7	0	-0.21	0.11	0.667	12.5	11.96	1.05	1	2	0.527	0.667	1
INSRR	1052	7813	75	8792	12	61	0.43	-0.27	0.92	0.147	16	11.83	1.46	3	15	0.667	0.667	1
PDCD11	1849	6923	10	8762	2	8	0	-0.21	0.14	0.668	20	21.08	0.94	1	1	0.421	0.668	1
KRT25	1055	6773	50	7779	6	43	-0.11	-0.6	0.38	0.668	12	13.49	0.9	5	7	0.00223	0.668	1
PTPRE	1815	7093	5	8903	1	4	0	-0.14	0.07	0.668	20	20.38	0.98	1	1	0.51	0.668	1
MCOLN2	1120	7134	16	8238	2	14	0	-0.31	0.21	0.671	12.5	13.57	0.91	1	3	0.549	0.671	1
PFKP	1606	7296	34	8869	7	26	0.08	-0.27	0.38	0.388	20.59	18.03	1.22	1	3	0.671	0.671	1
PIGO	2004	6904	15	8893	3	12	0	-0.23	0.16	0.672	20	22.5	0.86	2	1	0.0681	0.672	1
CACNA1D	2327	6527	141	8713	35	106	-0.12	-0.73	0.47	0.672	24.82	26.31	0.93	17	20	0.000126	0.672	1
RECQL	1468	7440	37	8871	8	29	0.16	-0.2	0.49	0.238	21.62	16.46	1.4	1	3	0.673	0.673	1
FCN3	1864	7032	10	8886	2	8	0	-0.2	0.14	0.673	20	20.95	0.94	2	5	0.664	0.673	1
TSPAN8	913	7758	11	8661	1	9	0	-0.24	0.12	0.673	9.09	10.53	0.94	1	1	0.278	0.673	1
CALB2	1065	7520	8	8577	1	7	0	-0.21	0.11	0.674	12.5	12.41	1.01	1	2	0.527	0.674	1
FNDC3B	1146	7690	8	8828	1	7	0	-0.2	0.1	0.674	12.5	12.97	0.96	1	1	0.34	0.674	1
ALDH4A1	2310	6599	18	8892	4	13	0	-0.23	0.18	0.674	22.22	25.93	0.88	2	1	0.0921	0.674	1
HIST1H4E	1245	6695	10	7931	2	7	0.1	-0.19	0.19	0.422	20	15.67	1.54	1	2	0.675	0.675	1
ATAD5	1089	6020	32	7078	4	27	0	-0.49	0.33	0.675	12.5	15.33	0.82	2	4	0.185	0.675	1
NOC2L	1241	7507	9	8739	2	7	0.09	-0.19	0.19	0.402	22.22	14.18	1.73	1	2	0.675	0.675	1
HAS1	1251	7641	9	8883	2	7	0.09	-0.14	0.19	0.344	22.22	14.06	1.75	1	2	0.675	0.675	1
BAIAP3	1104	7762	28	8838	3	25	0	-0.41	0.26	0.675	10.71	12.46	0.84	3	4	0.018	0.675	1
QSOX2	1113	5915	9	7019	2	7	0.11	-0.21	0.21	0.425	22.22	15.83	1.52	1	2	0.675	0.675	1
PLCB4	886	7639	9	8516	2	7	0.13	-0.13	0.25	0.236	22.22	10.38	2.46	1	2	0.675	0.675	1
GRIK4	1569	7339	19	8889	3	16	0	-0.31	0.19	0.676	15.79	17.62	0.88	1	3	0.602	0.676	1
IL11RA	1216	7627	14	8829	2	12	0	-0.29	0.19	0.676	14.29	13.75	1.05	2	2	0.0967	0.676	1
STK36	1114	5688	20	6782	3	17	0	-0.43	0.27	0.676	15	16.38	0.9	2	3	0.172	0.676	1
KRT13	2403	6505	83	8828	20	60	-0.06	-0.54	0.34	0.677	24.1	26.99	0.9	8	8	0.0053	0.677	1
ING1	961	7721	21	8661	2	19	0	-0.41	0.23	0.677	9.52	11.07	0.85	1	5	0.619	0.677	1
EIF2B2	1199	7708	25	8882	3	22	0	-0.39	0.24	0.677	12	13.47	0.88	1	3	0.483	0.677	1
ABLIM3	1398	7487	21	8864	3	18	0	-0.34	0.21	0.677	14.29	15.74	0.89	2	5	0.33	0.677	1
TPI1	1464	7434	35	8863	6	29	0	-0.37	0.33	0.529	17.14	16.45	1.05	1	4	0.679	0.679	1
UBQLN3	2029	6880	14	8895	4	10	0.06	-0.16	0.22	0.418	28.57	22.77	1.36	2	4	0.679	0.679	1
CPB1	1092	7812	18	8886	2	16	0	-0.31	0.21	0.68	11.11	12.27	0.89	1	1	0.242	0.68	1
UMODL1	2204	6676	48	8832	11	37	-0.06	-0.42	0.27	0.68	22.92	24.83	0.9	11	3	4.45e-11	0.68	1
FLT3	1845	7063	28	8880	5	23	0	-0.34	0.21	0.681	17.86	20.72	0.83	5	7	0.0132	0.681	1
SMTNL2	3223	5685	12	8896	4	8	0	-0.19	0.15	0.682	33.33	36.18	0.88	2	2	0.426	0.682	1
ADORA3	1303	7604	7	8900	1	6	0	-0.18	0.09	0.683	14.29	14.63	0.97	1	2	0.587	0.683	1
FGB	1466	7342	21	8788	3	17	0	-0.33	0.2	0.683	14.29	16.65	0.88	2	3	0.172	0.683	1
FAM154A	1490	7074	21	8544	4	16	0.08	-0.24	0.24	0.495	19.05	17.39	1.19	1	3	0.684	0.684	1
CD22	1016	7436	8	8444	1	7	0	-0.22	0.11	0.649	12.5	12.02	1.05	1	3	0.684	0.684	1
POLE	1807	7100	12	8895	3	9	0.07	-0.14	0.21	0.447	25	20.28	1.31	1	2	0.684	0.684	1
BTBD16	1669	6237	12	7894	3	9	0.08	-0.19	0.23	0.454	25	21.1	1.25	1	2	0.684	0.684	1
FOXRED2	1481	7080	9	8553	3	5	0.16	-0.04	0.24	0.128	33.33	17.28	2.87	1	1	0.684	0.684	1
ESYT3	1196	7598	39	8755	5	34	-0.1	-0.48	0.29	0.684	12.82	13.6	0.93	2	9	0.516	0.684	1
DDX31	1467	7310	15	8763	2	12	0	-0.25	0.16	0.684	13.33	16.72	0.83	2	2	0.0967	0.684	1
ADAMDEC1	1172	7732	5	8899	2	3	0.2	0	0.2	0.122	40	13.15	4.4	2	2	0.684	0.684	1
PCDHB15	1215	6496	8	7703	3	5	0.2	-0.05	0.29	0.11	37.5	15.73	3.21	1	1	0.684	0.684	1
HSD17B1	1769	7139	12	8896	3	9	0.07	-0.18	0.21	0.497	25	19.85	1.35	1	2	0.684	0.684	1
ROPN1B	1107	7244	9	8343	3	5	0.21	0	0.31	0.078	33.33	13.23	3.93	1	1	0.684	0.684	1
EFNA1	906	7831	8	8729	1	7	0	-0.25	0.12	0.588	12.5	10.37	1.23	1	3	0.684	0.684	1
PSMC3IP	1785	7123	5	8903	2	3	0.07	-0.07	0.14	0.27	40	20.03	2.66	2	2	0.684	0.684	1
CPNE3	1156	7485	9	8633	1	7	0	-0.2	0.1	0.678	11.11	13.38	0.92	1	3	0.684	0.684	1
NCSTN	1085	7806	13	8879	3	9	0.21	-0.1	0.31	0.159	23.08	12.19	2.4	1	2	0.684	0.684	1
ATP9A	1237	7668	33	8872	4	29	0	-0.47	0.28	0.685	12.12	13.9	0.86	1	3	0.462	0.685	1
SERHL2	1193	5785	20	6958	3	17	0	-0.4	0.25	0.685	15	17.1	0.86	2	3	0.172	0.685	1
MIF4GD	1152	7755	8	8900	1	6	0	-0.2	0.1	0.685	12.5	12.93	1.12	1	1	0.383	0.685	1
ITGB4	1463	7441	100	8806	15	83	-0.08	-0.7	0.45	0.687	15	16.44	0.92	7	18	0.0434	0.687	1
FAM92B	1560	6608	7	8161	3	4	0.16	-0.04	0.24	0.132	42.86	19.08	3.18	2	2	0.688	0.688	1
AXIN2	910	6885	5	7790	3	2	0.25	0.06	0.37	0.023	60	11.64	11.35	2	1	0.688	0.688	1
POLR3H	1185	7067	8	8245	3	4	0.2	0	0.3	0.0616	37.5	14.34	4.47	2	2	0.688	0.688	1
DBN1	1346	7560	3	8903	3	0	0.26	0.09	0.26	0.00275	100	15.08	0	2	0	0.688	0.688	1
SYK	1679	7220	5	8894	3	2	0.15	0	0.22	0.0433	60	18.84	6.45	2	1	0.688	0.688	1
NDUFS4	950	7933	5	8878	3	2	0.35	0.12	0.35	0.00947	60	10.67	12.53	2	1	0.688	0.688	1
IDUA	1073	7391	25	8439	3	22	0	-0.43	0.32	0.627	12	12.68	0.94	2	11	0.688	0.688	1
NCAPD3	1585	4941	7	6519	3	4	0.08	-0.08	0.25	0.236	42.86	24.27	2.34	2	2	0.688	0.688	1
SPATA13	1009	7884	15	8878	2	13	0	-0.28	0.22	0.523	13.33	11.34	1.2	1	4	0.688	0.688	1
PCBD1	1376	7531	15	8892	4	11	0.17	-0.13	0.34	0.202	26.67	15.43	1.99	1	2	0.689	0.689	1
ENPP7	1044	6500	32	7512	4	28	0	-0.5	0.33	0.69	12.5	13.84	0.89	2	8	0.458	0.69	1
TYMP	1782	6981	16	8747	3	13	0	-0.28	0.18	0.691	18.75	20.34	0.9	2	2	0.149	0.691	1
C3orf20	1804	7013	9	8808	4	5	0.14	-0.03	0.28	0.0937	44.44	20.44	3.11	2	2	0.691	0.691	1
ZIK1	1423	7482	9	8896	4	5	0.25	0	0.33	0.0394	44.44	15.95	4.21	2	2	0.691	0.691	1
TMC8	1293	7502	24	8771	3	21	0	-0.36	0.23	0.692	12.5	14.71	0.83	2	3	0.122	0.692	1
DYSF	1477	7432	207	8703	32	174	-0.16	-1.01	0.61	0.692	15.46	16.6	0.93	12	29	0.00563	0.692	1
RPL3L	1206	7471	18	8659	5	13	0.19	-0.1	0.48	0.111	27.78	13.87	2.38	1	2	0.693	0.693	1
SLIT2	1290	7585	74	8801	10	64	-0.09	-0.68	0.41	0.693	13.51	14.54	0.92	5	13	0.0582	0.693	1
PDE11A	1524	7386	37	8873	9	28	0.24	-0.16	0.55	0.161	24.32	17.07	1.56	2	6	0.693	0.693	1
KIAA1804	1361	7175	22	8514	3	19	0	-0.35	0.22	0.693	13.64	15.95	0.83	1	3	0.537	0.693	1
TGM7	959	5524	38	6445	5	33	-0.12	-0.61	0.37	0.693	13.16	14.8	0.87	4	6	0.0144	0.693	1
CSF2RB	1209	7369	58	8521	7	50	-0.1	-0.63	0.39	0.694	12.07	14.11	0.85	4	5	0.00661	0.694	1
HTR3D	1643	7049	13	8680	2	10	0	-0.23	0.15	0.694	15.38	18.91	0.86	2	1	0.0507	0.694	1
DUPD1	1081	5702	22	6761	3	19	0	-0.44	0.28	0.695	13.64	15.94	0.83	2	5	0.305	0.695	1
TRIM5	1187	7709	9	8887	1	8	0	-0.19	0.1	0.695	11.11	13.35	0.81	1	1	0.306	0.695	1
HCN2	1801	6973	11	8763	2	9	0	-0.21	0.14	0.695	18.18	20.53	0.86	2	2	0.156	0.695	1
SLC24A4	1671	7236	25	8882	4	21	0	-0.33	0.22	0.695	16	18.77	0.82	2	2	0.102	0.695	1
GBA2	2157	6751	36	8872	8	28	-0.06	-0.37	0.24	0.695	22.22	24.22	0.89	2	2	0.179	0.695	1
CHD1	1375	6022	74	7325	12	60	-0.09	-0.71	0.45	0.696	16.22	18.61	0.88	3	9	0.33	0.696	1
PLA1A	1504	7404	63	8845	12	51	0.08	-0.4	0.52	0.395	19.05	16.87	1.16	3	13	0.696	0.696	1
CDHR2	2197	6712	22	8888	6	15	0.06	-0.18	0.27	0.398	27.27	24.65	1.22	1	2	0.696	0.696	1
CRYAB	1094	6473	24	7543	3	21	0	-0.43	0.27	0.696	12.5	14.46	0.85	1	5	0.684	0.696	1
CSHL1	1442	7198	21	8619	3	18	0	-0.33	0.21	0.697	14.29	16.7	0.83	1	3	0.557	0.697	1
CAPN9	1552	6921	117	8361	19	93	-0.16	-0.79	0.47	0.697	16.24	18.34	0.91	9	17	0.00615	0.697	1
LRRK2	1623	7287	38	8873	6	31	-0.08	-0.41	0.26	0.698	15.79	18.22	0.87	2	4	0.257	0.698	1
NUP214	1372	7495	40	8827	6	34	0	-0.43	0.34	0.574	15	15.48	0.96	1	5	0.698	0.698	1
BCS1L	1112	5693	33	6772	7	26	0.21	-0.32	0.54	0.303	21.21	16.32	1.38	2	7	0.698	0.698	1
DDX55	1291	7618	48	8861	6	42	-0.09	-0.54	0.32	0.698	12.5	14.5	0.84	3	8	0.144	0.698	1
SIGLEC1	1606	7295	26	8875	4	22	0	-0.34	0.23	0.698	15.38	18.05	0.83	1	4	0.663	0.698	1
RCBTB1	2170	6564	28	8706	6	22	-0.06	-0.34	0.21	0.699	21.43	24.86	0.82	3	0	0.000337	0.699	1
PNPLA3	2367	6538	30	8875	7	23	-0.06	-0.32	0.2	0.699	23.33	26.59	0.84	3	3	0.0983	0.699	1
CTRC	2066	6843	24	8885	5	19	-0.06	-0.32	0.19	0.699	20.83	23.2	0.87	3	6	0.303	0.699	1
GH2	1623	7277	55	8845	9	46	-0.08	-0.53	0.3	0.7	16.36	18.25	0.88	9	5	3.68e-08	0.7	1
FERMT1	1464	7418	35	8847	5	30	-0.08	-0.45	0.25	0.7	14.29	16.49	0.84	2	8	0.522	0.7	1
GPSM1	1321	5803	17	7107	6	11	0.28	-0.05	0.51	0.0808	35.29	18.5	2.4	3	5	0.7	0.7	1
ARHGEF10	2653	6241	31	8864	8	22	-0.05	-0.32	0.21	0.701	25.81	29.84	0.86	3	0	0.000782	0.701	1
ACOT8	1380	6944	24	8300	4	20	0	-0.35	0.26	0.583	16.67	16.58	1.01	1	4	0.701	0.701	1
PDHB	1946	6962	16	8892	3	13	0	-0.26	0.16	0.701	18.75	21.85	0.83	3	2	0.0197	0.701	1
RAB34	1307	7239	10	8536	4	6	0.27	0	0.36	0.0468	40	15.26	3.69	1	1	0.701	0.701	1
EIF3F	913	7868	23	8758	2	21	0	-0.43	0.24	0.702	8.7	10.4	0.82	1	6	0.65	0.702	1
CNTN4	1804	7087	18	8874	3	14	0	-0.28	0.17	0.702	16.67	20.3	0.84	2	2	0.132	0.702	1
ATIC	1611	7298	50	8859	8	42	-0.08	-0.49	0.3	0.702	16	18.09	0.86	6	10	0.00884	0.702	1
LRIT2	1941	6657	25	8573	12	13	0.4	0.13	0.67	0.00456	48	22.5	3.17	2	2	0.703	0.703	1
PCSK1	1044	6836	33	7847	4	29	0	-0.5	0.33	0.68	12.12	13.25	0.9	1	6	0.705	0.705	1
ROS1	2366	6542	85	8826	20	62	-0.12	-0.55	0.35	0.705	23.53	26.58	0.89	11	14	0.00325	0.705	1
TAS2R14	1026	7856	11	8871	1	10	0	-0.28	0.11	0.706	9.09	11.55	0.77	1	4	0.651	0.706	1
ERCC2	1292	7270	103	8459	14	89	-0.09	-0.82	0.46	0.706	13.59	15.11	0.89	7	8	0.000217	0.706	1
SLC44A3	1529	7374	27	8876	4	23	-0.08	-0.39	0.24	0.707	14.81	17.18	0.84	2	4	0.237	0.707	1
ACSF3	1304	7451	19	8736	3	16	0	-0.27	0.27	0.572	15.79	14.89	1.07	1	4	0.708	0.708	1
PDE9A	1321	7552	19	8854	3	16	0	-0.27	0.27	0.511	15.79	14.89	1.07	1	4	0.708	0.708	1
C3	2253	6654	9	8898	2	7	0	-0.18	0.12	0.709	22.22	25.3	0.84	2	0	0.0112	0.709	1
KDR	970	7939	46	8866	4	39	-0.12	-0.58	0.35	0.709	8.7	10.9	0.84	2	5	0.142	0.709	1
LIG3	1267	6911	29	8149	7	22	0.28	-0.14	0.56	0.149	24.14	15.46	1.74	2	6	0.709	0.709	1
GJC1	2267	6641	23	8885	5	18	-0.06	-0.3	0.18	0.71	21.74	25.46	0.81	2	2	0.181	0.71	1
CDH17	1701	7208	12	8897	2	10	0	-0.22	0.15	0.711	16.67	19.1	0.85	2	1	0.0507	0.711	1
EPS8L3	1745	7164	12	8897	2	10	0	-0.21	0.14	0.712	16.67	19.59	0.82	1	3	0.683	0.712	1
HK1	1595	7314	42	8867	9	33	0.15	-0.27	0.46	0.342	21.43	17.89	1.25	3	11	0.712	0.712	1
TNFRSF10D	1365	7536	14	8887	2	12	0	-0.26	0.17	0.713	14.29	15.34	0.92	2	2	0.0967	0.713	1
FTCD	1636	7059	32	8664	5	26	-0.08	-0.41	0.23	0.714	15.62	18.83	0.83	3	4	0.0623	0.714	1
KIAA0020	1330	6746	24	8054	3	19	0	-0.36	0.23	0.715	12.5	16.48	0.8	1	4	0.639	0.715	1
PGM3	886	4426	7	5305	1	6	0	-0.27	0.14	0.715	14.29	16.68	0.83	1	2	0.587	0.715	1
MYBPHL	1977	6932	15	8894	3	12	0	-0.23	0.2	0.632	20	22.19	0.88	1	3	0.715	0.715	1
LAMB2	1950	6640	33	8557	9	24	0.07	-0.27	0.4	0.371	27.27	22.68	1.28	3	8	0.716	0.716	1
ADAM11	1888	6941	5	8824	1	4	0	-0.13	0.07	0.716	20	21.38	0.92	1	1	0.51	0.716	1
C5orf45	1858	6696	32	8522	13	19	0.41	0.1	0.72	0.0111	40.62	21.65	2.47	4	6	0.717	0.717	1
ADCK4	1034	7742	18	8759	2	15	0	-0.33	0.22	0.617	11.11	11.78	1	1	5	0.717	0.717	1
RFNG	1601	7074	13	8662	2	11	0	-0.23	0.15	0.717	15.38	18.46	0.8	2	1	0.043	0.717	1
PLEKHG2	1786	6577	11	8352	2	9	0	-0.21	0.14	0.717	18.18	21.36	0.82	1	2	0.578	0.717	1
SLC27A3	904	7668	24	8549	2	21	0	-0.43	0.25	0.718	8.33	10.55	0.81	1	2	0.304	0.718	1
PCDHAC1	1110	6265	26	7351	3	21	0	-0.42	0.27	0.718	11.54	15.06	0.81	3	1	0.0012	0.718	1
IRF7	1444	7259	62	8641	9	53	-0.08	-0.62	0.33	0.718	14.52	16.61	0.85	4	11	0.145	0.718	1
ZNF544	1007	7391	21	8378	2	18	0	-0.39	0.23	0.718	9.52	12	0.82	2	4	0.142	0.718	1
CNPY4	1833	7072	12	8893	2	10	0	-0.21	0.14	0.72	16.67	20.59	0.77	1	3	0.683	0.72	1
LRP2BP	1171	7630	9	8792	1	8	0	-0.25	0.1	0.72	11.11	13.31	0.81	1	1	0.306	0.72	1
VILL	1279	3804	18	5065	4	14	-0.1	-0.47	0.31	0.72	22.22	25.17	0.85	1	2	0.598	0.72	1
SLC43A3	930	7977	15	8893	2	12	0.12	-0.24	0.24	0.45	13.33	10.44	1.43	1	4	0.72	0.72	1
TLN2	1610	7298	44	8865	7	36	-0.08	-0.49	0.27	0.72	15.91	18.08	0.88	6	6	0.000594	0.72	1
TLR3	1062	7275	24	8314	4	19	0.11	-0.27	0.43	0.34	16.67	12.73	1.44	1	4	0.72	0.72	1
DOPEY2	1808	7097	29	8876	5	24	-0.07	-0.35	0.21	0.72	17.24	20.31	0.82	2	2	0.114	0.72	1
ZHX2	996	7141	20	8117	2	18	0	-0.4	0.23	0.72	10	12.25	0.8	1	3	0.457	0.72	1
TNNT3	1386	7469	16	8839	2	14	0	-0.3	0.17	0.72	12.5	15.66	0.77	1	3	0.549	0.72	1
AAAS	1059	7850	49	8860	5	44	-0.11	-0.59	0.32	0.721	10.2	11.9	0.84	3	10	0.144	0.721	1
APRT	1269	7428	15	8682	2	13	0	-0.32	0.18	0.721	13.33	14.59	0.9	1	4	0.688	0.721	1
GABRR1	1923	6986	27	8882	5	22	-0.07	-0.33	0.2	0.723	18.52	21.59	0.83	2	2	0.132	0.723	1
ALDH8A1	940	5326	22	6244	3	19	0	-0.44	0.38	0.615	13.64	15.01	0.89	1	5	0.724	0.724	1
MPRIP	1587	7039	14	8612	4	10	0.15	-0.12	0.31	0.211	28.57	18.38	1.77	1	2	0.724	0.724	1
ACY3	1205	7696	44	8858	7	36	0.1	-0.34	0.48	0.385	15.91	13.52	1.24	1	5	0.724	0.724	1
THBS1	1023	4643	57	5609	9	48	-0.12	-0.89	0.48	0.724	15.79	18.08	0.85	4	6	0.0335	0.724	1
LSS	1684	7208	19	8873	3	16	0	-0.29	0.15	0.725	15.79	18.95	0.8	2	1	0.0414	0.725	1
SERPINA11	931	7447	25	8356	2	20	0	-0.48	0.24	0.725	8	11.12	0.8	2	3	0.0741	0.725	1
PIKFYVE	1057	7852	12	8898	2	9	0.11	-0.21	0.21	0.399	16.67	11.86	1.65	1	3	0.725	0.725	1
SYCE1	1109	7797	11	8895	2	9	0.1	-0.21	0.21	0.449	18.18	12.45	1.56	1	3	0.725	0.725	1
SPIRE2	1415	6562	11	7966	2	9	0	-0.26	0.17	0.619	18.18	17.74	1.03	1	3	0.725	0.725	1
ASCL3	1505	7374	57	8823	8	48	-0.08	-0.56	0.32	0.725	14.04	16.97	0.82	5	7	0.00616	0.725	1
PKDREJ	1307	4849	28	6128	5	23	-0.1	-0.49	0.29	0.726	17.86	21.25	0.81	3	3	0.044	0.726	1
FBP1	1400	7487	31	8856	4	27	-0.08	-0.42	0.25	0.726	12.9	15.76	0.79	4	3	0.0011	0.726	1
CTSA	1163	6815	25	7953	3	22	-0.1	-0.45	0.2	0.726	12	14.59	0.8	2	6	0.318	0.726	1
CELSR3	1237	7245	35	8448	6	28	0.09	-0.28	0.47	0.351	17.14	14.57	1.26	2	9	0.726	0.726	1
MST1R	1955	6940	36	8859	7	29	-0.07	-0.39	0.23	0.727	19.44	21.99	0.86	4	5	0.0422	0.727	1
C1orf50	985	7923	11	8897	1	10	0	-0.29	0.11	0.728	9.09	11.06	0.8	1	2	0.403	0.728	1
F11	1603	7229	39	8794	6	32	-0.08	-0.46	0.23	0.728	15.38	18.16	0.85	3	6	0.143	0.728	1
LLGL2	2024	6844	11	8857	3	8	0	-0.16	0.19	0.501	27.27	22.82	1.27	1	2	0.728	0.728	1
ZNF221	1544	7362	14	8892	2	12	0	-0.27	0.16	0.728	14.29	17.34	0.79	2	0	0.00432	0.728	1
TRIP6	1662	7231	11	8882	3	8	0.07	-0.15	0.22	0.334	27.27	18.68	1.63	1	2	0.728	0.728	1
KIF27	1209	6644	32	7823	4	26	-0.1	-0.49	0.29	0.728	12.5	15.4	0.85	3	6	0.094	0.728	1
HGD	928	7975	57	8847	7	49	0.12	-0.42	0.6	0.338	12.28	10.41	1.23	1	7	0.728	0.728	1
ITIH4	1978	6348	16	8311	3	12	0	-0.27	0.13	0.729	18.75	23.76	0.8	1	1	0.388	0.729	1
LRP2	2155	6754	361	8551	83	275	-0.24	-1.25	0.67	0.729	22.99	24.23	0.95	32	39	6.57e-08	0.729	1
GOLGA3	1553	7352	34	8871	5	29	-0.08	-0.43	0.23	0.729	14.71	17.45	0.82	4	4	0.00589	0.729	1
EMR3	1294	7613	25	8882	3	22	-0.09	-0.41	0.18	0.73	12	14.54	0.8	1	4	0.581	0.73	1
MYBBP1A	2993	5910	10	8893	3	7	0	-0.18	0.1	0.73	30	33.62	0.85	1	1	0.564	0.73	1
ATP6V0A4	1062	7778	50	8791	5	44	-0.11	-0.64	0.32	0.73	10	12.02	0.83	3	9	0.113	0.73	1
GYS1	1576	7321	28	8870	4	23	-0.08	-0.39	0.23	0.73	14.29	17.72	0.81	3	8	0.242	0.73	1
SUSD3	968	5636	8	6596	1	7	0	-0.3	0.12	0.731	12.5	14.66	0.83	1	2	0.527	0.731	1
DLL1	1475	7427	23	8880	3	19	-0.08	-0.33	0.16	0.731	13.04	16.58	0.8	2	6	0.393	0.731	1
PTPRK	1364	7544	8	8900	1	7	0	-0.22	0.09	0.731	12.5	15.31	0.79	1	1	0.34	0.731	1
WDR6	1191	7381	20	8553	7	12	0.49	0.15	0.68	0.00585	35	13.84	3.62	3	5	0.731	0.731	1
WDR17	1792	7117	12	8897	2	10	0	-0.24	0.14	0.731	16.67	20.12	0.79	1	2	0.539	0.731	1
DEFB132	1705	7195	7	8893	1	6	0	-0.15	0.07	0.732	14.29	19.16	0.7	1	1	0.383	0.732	1
SP110	1684	7225	19	8891	3	15	0	-0.29	0.18	0.685	15.79	18.91	0.86	1	4	0.733	0.733	1
CD101	1459	7447	18	8888	3	15	0	-0.25	0.25	0.585	16.67	16.38	1.02	1	4	0.733	0.733	1
SCO1	1917	6591	17	8491	3	14	-0.07	-0.27	0.13	0.733	17.65	22.54	0.74	3	2	0.0162	0.733	1
CAMTA1	1981	6927	8	8900	2	6	0	-0.13	0.13	0.569	25	22.24	1.17	1	2	0.734	0.734	1
LTBR	1047	7858	8	8897	2	6	0.11	-0.11	0.22	0.226	25	11.75	2.5	1	2	0.734	0.734	1
ANGPTL4	998	6224	8	7214	2	6	0.12	-0.12	0.23	0.319	25	13.81	2.08	1	2	0.734	0.734	1
LRSAM1	2012	6823	27	8809	5	21	-0.06	-0.32	0.19	0.734	18.52	22.78	0.81	3	2	0.0225	0.734	1
C9orf89	1340	7541	8	8873	2	6	0.09	-0.09	0.18	0.329	25	15.08	1.88	1	2	0.734	0.734	1
CASP9	2070	6839	8	8901	2	6	0	-0.16	0.13	0.608	25	23.23	1.1	1	2	0.734	0.734	1
PLG	1848	6968	17	8799	3	14	-0.07	-0.27	0.14	0.734	17.65	20.97	0.81	2	4	0.348	0.734	1
LPO	1271	6204	68	7407	10	58	-0.09	-0.71	0.38	0.734	14.71	17.02	0.84	7	12	0.0028	0.734	1
TLR6	1012	6686	18	7680	4	14	0.23	-0.17	0.46	0.223	22.22	13.12	1.89	1	3	0.735	0.735	1
PLD2	3785	5123	16	8892	6	10	-0.05	-0.21	0.14	0.736	37.5	42.5	0.81	4	1	0.00857	0.736	1
CA9	2469	6440	17	8892	4	13	-0.06	-0.25	0.14	0.737	23.53	27.72	0.8	1	2	0.626	0.737	1
OR1A2	2119	6738	10	8847	2	8	0	-0.19	0.12	0.738	20	23.93	0.79	2	2	0.189	0.738	1
USP28	1043	7865	19	8889	2	17	0	-0.33	0.22	0.656	10.53	11.71	0.89	1	6	0.739	0.739	1
UNC119	1474	7412	17	8870	2	14	0	-0.28	0.16	0.739	11.76	16.6	0.72	1	3	0.549	0.739	1
DZIP1L	1290	7472	17	8745	2	15	0	-0.32	0.18	0.74	11.76	14.73	0.77	1	4	0.629	0.74	1
ABHD12B	1497	7281	7	8771	1	6	0	-0.2	0.08	0.742	14.29	17.06	0.81	1	2	0.587	0.742	1
SERPINA6	1791	7089	36	8845	6	29	-0.07	-0.42	0.21	0.743	16.67	20.18	0.82	5	4	0.00122	0.743	1
VPS13C	1631	7277	40	8869	8	31	0.08	-0.3	0.38	0.409	20	18.3	1.15	1	4	0.744	0.744	1
TTC16	1112	6609	17	7704	2	15	0	-0.42	0.21	0.744	11.76	14.41	0.79	1	3	0.523	0.744	1
NEFH	1760	7144	42	8862	7	35	-0.07	-0.46	0.25	0.744	16.67	19.78	0.81	4	10	0.179	0.744	1
SCLY	979	7680	34	8626	3	30	-0.12	-0.52	0.23	0.745	8.82	11.31	0.78	3	2	0.00197	0.745	1
TTC5	1041	7845	22	8865	3	18	0.11	-0.27	0.33	0.431	13.64	11.71	1.26	1	5	0.745	0.745	1
FRMD4A	1501	7405	41	8865	7	34	0	-0.36	0.36	0.517	17.07	16.85	1.02	1	5	0.745	0.745	1
KRT23	1427	6422	34	7816	5	28	-0.09	-0.47	0.26	0.745	14.71	18.19	0.8	1	3	0.538	0.745	1
MYL7	922	7981	21	8882	3	18	0.12	-0.24	0.36	0.385	14.29	10.35	1.44	1	5	0.745	0.745	1
ZZEF1	3240	5668	9	8899	3	6	0	-0.15	0.1	0.745	33.33	36.37	0.87	1	1	0.619	0.745	1
SEC31B	1207	4035	46	5197	9	36	-0.11	-0.75	0.43	0.745	19.57	23.05	0.84	3	6	0.25	0.745	1
CUL4A	1306	7601	8	8899	1	7	0	-0.22	0.09	0.746	12.5	14.66	0.83	1	3	0.684	0.746	1
VEPH1	1342	7020	27	8336	5	21	0.09	-0.27	0.36	0.391	18.52	16.04	1.25	1	4	0.747	0.747	1
MICAL1	1554	5613	38	7130	13	24	0.41	0	0.78	0.0438	34.21	21.61	1.96	3	6	0.747	0.747	1
PLA2G4D	1280	7230	8	8502	1	7	0	-0.23	0.09	0.747	12.5	15.04	0.81	1	1	0.34	0.747	1
NAGLU	1860	7048	41	8868	7	33	-0.07	-0.44	0.24	0.747	17.07	20.9	0.8	4	8	0.114	0.747	1
ITGA7	1208	7355	35	8528	4	31	-0.1	-0.48	0.29	0.748	11.43	14.12	0.79	2	9	0.465	0.748	1
POLR2C	1163	7227	14	8376	3	11	0.1	-0.2	0.3	0.3	21.43	13.85	1.69	1	3	0.748	0.748	1
HTR3C	1646	7041	40	8649	6	32	-0.07	-0.45	0.22	0.748	15	18.96	0.8	3	7	0.198	0.748	1
ADCY9	996	7910	30	8876	4	26	0.11	-0.34	0.4	0.461	13.33	11.18	1.22	1	6	0.748	0.748	1
HR	1458	5934	6	7386	1	5	0	-0.17	0.09	0.749	16.67	19.73	0.81	1	0	0.16	0.749	1
BCL2L12	968	7937	12	8893	1	11	0	-0.35	0.12	0.749	8.33	10.87	0.75	1	2	0.373	0.749	1
EPHA4	1034	7640	12	8663	1	10	0	-0.33	0.11	0.749	8.33	11.92	0.74	1	2	0.403	0.749	1
SLC29A2	1002	7896	13	8885	5	8	0.45	0.11	0.56	0.00994	38.46	11.22	4.93	2	3	0.749	0.749	1
SLC50A1	908	7834	3	8739	1	2	0.12	-0.06	0.12	0.269	33.33	10.38	4.31	1	1	0.75	0.75	1
TCF4	922	6185	3	7104	1	2	0.12	-0.12	0.12	0.344	33.33	12.96	3.35	1	1	0.75	0.75	1
SHISA5	1194	5518	3	6709	1	2	0.1	-0.1	0.1	0.443	33.33	17.78	2.31	1	1	0.75	0.75	1
APIP	1415	7225	3	8637	1	2	0.08	-0.08	0.08	0.437	33.33	16.37	2.55	1	1	0.75	0.75	1
OR2AE1	923	7001	5	7919	1	4	0.12	-0.12	0.12	0.421	20	11.64	1.9	1	2	0.75	0.75	1
PHYH	1154	7754	48	8860	5	43	-0.1	-0.6	0.3	0.75	10.42	12.97	0.78	2	7	0.272	0.75	1
AMFR	917	6836	3	7750	1	2	0.12	-0.12	0.12	0.324	33.33	11.82	3.73	1	1	0.75	0.75	1
C14orf119	1848	7060	3	8905	1	2	0.07	-0.07	0.07	0.48	33.33	20.74	1.91	1	1	0.75	0.75	1
PPIL6	880	5569	7	6442	1	6	0	-0.26	0.13	0.633	14.29	13.64	1.05	1	3	0.75	0.75	1
TSC22D1	961	7626	5	8582	1	4	0.12	-0.12	0.12	0.439	20	11.19	1.98	1	2	0.75	0.75	1
CDK20	1007	7766	7	8766	1	6	0	-0.22	0.11	0.569	14.29	11.48	1.29	1	3	0.75	0.75	1
PRKCQ	1366	7212	16	8562	2	14	0	-0.35	0.17	0.75	12.5	15.93	0.75	2	4	0.216	0.75	1
GFOD2	902	5788	3	6687	1	2	0.13	-0.13	0.13	0.341	33.33	13.47	3.21	1	1	0.75	0.75	1
NUP153	1354	7554	3	8905	1	2	0.09	-0.09	0.09	0.396	33.33	15.19	2.79	1	1	0.75	0.75	1
C6orf118	1332	7338	5	8665	1	4	0	-0.13	0.09	0.567	20	15.36	1.38	1	2	0.75	0.75	1
RPLP2	1523	7256	3	8776	1	2	0.08	-0.08	0.08	0.428	33.33	17.34	2.38	1	1	0.75	0.75	1
ANO7	1868	7030	23	8875	4	19	-0.07	-0.34	0.17	0.75	17.39	21	0.79	1	4	0.72	0.75	1
VAMP5	1226	7680	7	8901	1	4	0	-0.14	0.09	0.521	14.29	13.76	1.57	1	2	0.75	0.75	1
SPRYD4	1190	7718	3	8905	1	2	0.1	-0.1	0.1	0.342	33.33	13.35	3.24	1	1	0.75	0.75	1
PLXNB1	2059	6851	5	8905	1	4	0	-0.13	0.06	0.707	20	23.11	0.83	1	2	0.75	0.75	1
SPOCK3	911	6531	6	7437	1	4	0.13	-0.13	0.13	0.483	16.67	12.24	1.79	1	2	0.75	0.75	1
EPHA7	1595	7312	3	8904	1	2	0.08	-0.08	0.08	0.437	33.33	17.9	2.29	1	1	0.75	0.75	1
EPHA1	1269	7637	43	8863	5	38	-0.09	-0.55	0.28	0.75	11.63	14.26	0.79	3	9	0.159	0.75	1
SNX11	946	7933	4	8876	1	2	0.12	-0.12	0.12	0.349	25	10.65	4.19	1	1	0.75	0.75	1
MAPT	1296	5100	3	6393	1	2	0.1	-0.1	0.1	0.491	33.33	20.26	1.97	1	1	0.75	0.75	1
BET1L	1736	6766	3	8499	1	2	0.07	-0.07	0.07	0.492	33.33	20.41	1.95	1	1	0.75	0.75	1
VLDLR	1189	3907	93	5006	19	71	-0.22	-1.15	0.6	0.75	20.43	23.37	0.88	10	19	0.0243	0.75	1
SAMD15	1073	5691	8	6756	1	7	0	-0.28	0.11	0.751	12.5	15.87	0.76	1	1	0.34	0.751	1
ATR	1340	7482	18	8805	2	15	0	-0.35	0.18	0.751	11.11	15.2	0.74	1	4	0.629	0.751	1
PLEKHA4	1744	6328	6	8066	1	5	0	-0.15	0.07	0.751	16.67	21.61	0.73	1	2	0.66	0.751	1
TAS1R2	2311	6598	86	8823	20	66	-0.12	-0.61	0.32	0.752	23.26	25.97	0.87	8	13	0.0448	0.752	1
ACCS	1184	7618	42	8761	6	35	0	-0.44	0.39	0.507	14.29	13.45	1.1	1	6	0.752	0.752	1
ADAM7	1138	4717	13	5842	2	11	0	-0.38	0.22	0.753	15.38	19.45	0.75	2	1	0.043	0.753	1
ERBB3	1133	7752	20	8865	2	18	0	-0.4	0.2	0.753	10	12.76	0.76	1	3	0.457	0.753	1
PCDHB13	1763	7072	19	8816	3	16	-0.07	-0.32	0.14	0.753	15.79	19.96	0.75	1	4	0.708	0.753	1
SELENBP1	1047	7860	11	8896	1	10	0	-0.32	0.11	0.753	9.09	11.76	0.75	1	1	0.254	0.753	1
SMTN	1373	7326	16	8683	2	14	0	-0.35	0.17	0.753	12.5	15.79	0.76	1	5	0.746	0.753	1
ACBD5	1106	7792	20	8878	2	18	0	-0.41	0.21	0.753	10	12.44	0.78	1	4	0.556	0.753	1
TAOK2	936	6571	16	7491	5	11	0.37	0	0.61	0.0414	31.25	12.43	3.19	1	2	0.754	0.754	1
OLFM4	1308	6609	44	7873	6	38	-0.09	-0.6	0.27	0.754	13.64	16.54	0.8	3	6	0.0958	0.754	1
SORL1	2049	6860	140	8771	29	109	-0.19	-0.79	0.41	0.754	20.71	23.03	0.89	12	24	0.022	0.754	1
KIAA0195	1718	7097	42	8774	7	34	-0.07	-0.47	0.25	0.755	16.67	19.5	0.85	4	3	0.00502	0.755	1
CALR	1052	7841	7	8888	2	3	0.22	0	0.22	0.109	28.57	11.81	4.97	1	1	0.756	0.756	1
IGDCC4	976	6002	5	6973	2	3	0.12	0	0.24	0.137	40	13.97	4.1	1	1	0.756	0.756	1
MYCBPAP	2363	6368	5	8726	2	3	0.06	-0.09	0.12	0.446	40	27.06	1.8	1	1	0.756	0.756	1
PADI3	1420	7344	5	8759	2	3	0.08	-0.08	0.17	0.192	40	16.19	3.45	1	1	0.756	0.756	1
CTR9	1576	7333	5	8904	2	3	0.08	-0.08	0.15	0.213	40	17.68	3.1	1	1	0.756	0.756	1
SLC25A44	1047	7465	22	8491	2	19	0	-0.44	0.22	0.742	9.09	12.31	0.75	1	7	0.756	0.756	1
METTL3	1694	7214	5	8903	2	3	0.07	-0.07	0.15	0.227	40	19	2.84	1	1	0.756	0.756	1
FBXW12	1861	7048	5	8904	2	3	0.07	-0.1	0.14	0.434	40	20.88	2.52	1	1	0.756	0.756	1
KIF3A	1017	7892	5	8904	2	3	0.11	-0.06	0.22	0.174	40	11.4	5.17	1	1	0.756	0.756	1
PTPRU	1293	6317	13	7597	2	11	0	-0.28	0.19	0.681	15.38	16.99	0.89	1	4	0.756	0.756	1
GRIA1	1293	7428	13	8708	2	11	0	-0.27	0.18	0.585	15.38	14.83	1.04	1	4	0.756	0.756	1
MSH4	1722	7182	40	8865	6	33	-0.07	-0.43	0.22	0.757	15	19.36	0.76	5	10	0.0326	0.757	1
XDH	1287	7623	43	8867	5	38	-0.09	-0.54	0.27	0.758	11.63	14.46	0.78	3	8	0.122	0.758	1
ATP5S	1293	7229	6	8516	1	5	0	-0.18	0.09	0.758	16.67	15.17	1.12	1	2	0.66	0.758	1
POLQ	1033	7876	75	8835	14	60	0.66	-0.05	1.15	0.0412	18.67	11.53	1.78	2	10	0.758	0.758	1
NUCB1	1946	6915	7	8854	3	4	0.13	-0.07	0.2	0.186	42.86	21.94	2.67	1	1	0.76	0.76	1
FCRL6	1218	7676	17	8877	3	14	0.1	-0.24	0.29	0.442	17.65	13.69	1.35	1	4	0.76	0.76	1
TATDN1	942	6313	18	7238	3	14	0.12	-0.24	0.37	0.386	16.67	12.97	1.44	1	4	0.76	0.76	1
SLC26A10	1157	7751	48	8860	5	43	-0.1	-0.6	0.3	0.761	10.42	13	0.78	3	6	0.0455	0.761	1
KDM1B	1699	7210	13	8896	2	11	0	-0.25	0.15	0.762	15.38	19.08	0.77	2	2	0.112	0.762	1
FUT2	1623	7256	49	8830	7	42	-0.08	-0.53	0.26	0.762	14.29	18.3	0.75	4	10	0.106	0.762	1
CDHR1	1995	6897	13	8879	4	9	0.06	-0.13	0.26	0.299	30.77	22.42	1.54	1	2	0.763	0.763	1
KIFC3	1072	7710	12	8770	1	11	0	-0.32	0.11	0.763	8.33	12.21	0.65	1	3	0.498	0.763	1
LAMB3	1983	6919	19	8885	3	14	-0.06	-0.29	0.13	0.763	15.79	22.28	0.75	1	3	0.655	0.763	1
EPHA3	1089	5181	22	6249	4	17	0.11	-0.33	0.33	0.496	18.18	17.36	1.12	1	4	0.763	0.763	1
CHRNB4	1131	7769	31	8871	4	25	0.1	-0.35	0.35	0.489	12.9	12.7	1.1	1	6	0.763	0.763	1
EPHB3	1185	5865	17	7034	2	14	-0.1	-0.41	0.2	0.764	11.76	16.82	0.71	1	1	0.271	0.764	1
PIK3R5	1988	4431	16	6403	4	12	-0.07	-0.33	0.18	0.764	25	30.99	0.74	2	1	0.105	0.764	1
ZSCAN29	899	5146	9	6036	1	8	0	-0.39	0.13	0.765	11.11	14.88	0.72	1	2	0.478	0.765	1
NCAPD2	2001	6907	28	8883	5	20	-0.06	-0.32	0.19	0.698	17.86	22.47	0.86	1	4	0.765	0.765	1
UBTF	1418	7483	24	8877	3	21	-0.08	-0.38	0.17	0.767	12.5	15.94	0.75	2	0	0.00301	0.767	1
KRT84	1550	7314	35	8829	5	30	-0.08	-0.47	0.23	0.767	14.29	17.5	0.79	2	7	0.447	0.767	1
NDUFS2	1660	6765	13	8412	2	11	0	-0.26	0.15	0.767	15.38	19.71	0.74	2	2	0.112	0.767	1
FLG	1808	6440	102	8147	19	82	-0.14	-0.74	0.35	0.767	18.63	21.96	0.83	15	8	1.34e-11	0.767	1
DDX11	889	5727	30	6587	3	26	-0.13	-0.65	0.26	0.768	10	13.45	0.74	1	6	0.668	0.768	1
KRT6C	1671	7229	49	8854	7	39	-0.07	-0.52	0.26	0.768	14.29	18.79	0.78	2	9	0.601	0.768	1
PSMD3	1705	7202	31	8877	7	23	0.07	-0.25	0.36	0.362	22.58	19.13	1.29	2	7	0.769	0.769	1
APOA4	1426	7449	34	8841	6	28	0.08	-0.29	0.38	0.421	17.65	16.06	1.12	1	5	0.771	0.771	1
ANKRD27	1129	7325	30	8424	3	27	-0.1	-0.51	0.2	0.771	10	13.37	0.72	1	7	0.713	0.771	1
KRT83	1208	7279	36	8452	4	31	-0.1	-0.53	0.24	0.771	11.11	14.25	0.78	3	5	0.0386	0.771	1
ACTG2	1052	7714	10	8756	2	8	0.11	-0.16	0.22	0.362	20	11.99	1.83	1	3	0.772	0.772	1
ATOH7	1050	7848	11	8888	2	8	0.11	-0.16	0.22	0.322	18.18	11.79	1.87	1	3	0.772	0.772	1
ANK3	1902	7006	35	8874	6	28	-0.07	-0.4	0.2	0.772	17.14	21.37	0.79	3	6	0.192	0.772	1
PLEKHG4B	1292	7094	10	8376	2	8	0.09	-0.18	0.18	0.466	20	15.4	1.37	1	3	0.772	0.772	1
2017-09-12	1831	7076	19	8888	3	16	-0.07	-0.31	0.14	0.773	15.79	20.57	0.72	3	0	9.95e-05	0.773	1
STT3A	1325	7562	21	8867	5	15	0.18	-0.13	0.44	0.181	23.81	14.89	1.9	1	3	0.773	0.773	1
GGCX	1290	7616	60	8846	7	53	-0.09	-0.63	0.32	0.774	11.67	14.5	0.78	4	6	0.00983	0.774	1
HSDL1	1780	7128	25	8883	4	21	-0.07	-0.35	0.18	0.775	16	19.99	0.76	3	2	0.0123	0.775	1
OVGP1	1467	5170	18	6619	3	15	-0.09	-0.39	0.18	0.775	16.67	22.12	0.7	2	3	0.21	0.775	1
ALPI	1073	7810	63	8821	6	56	-0.11	-0.74	0.32	0.776	9.52	12.1	0.78	3	15	0.29	0.776	1
ZNF543	1788	7118	13	8893	2	11	-0.07	-0.28	0.14	0.776	15.38	20.08	0.72	1	2	0.504	0.776	1
IL7R	1218	7595	28	8785	3	25	-0.1	-0.48	0.19	0.777	10.71	13.83	0.75	1	4	0.532	0.777	1
IFITM5	1491	7281	10	8762	3	7	0.08	-0.08	0.24	0.222	30	16.98	2.09	1	2	0.777	0.777	1
RNPEP	1227	7681	10	8898	3	7	0.19	-0.09	0.28	0.135	30	13.76	2.68	1	2	0.777	0.777	1
ALDH1L2	1160	7326	73	8413	8	65	-0.2	-0.75	0.35	0.777	10.96	13.69	0.78	5	11	0.0109	0.777	1
APEH	2555	6348	10	8893	3	7	0	-0.14	0.16	0.501	30	28.7	1.06	1	2	0.777	0.777	1
C1QTNF2	1058	7607	23	8642	2	21	-0.11	-0.43	0.22	0.778	8.7	12.22	0.68	1	1	0.191	0.778	1
CDKL1	1015	7464	24	8456	2	21	-0.11	-0.45	0.22	0.78	8.33	11.98	0.7	1	5	0.578	0.78	1
XRCC1	1112	7794	12	8894	1	11	0	-0.31	0.1	0.781	8.33	12.49	0.64	1	2	0.373	0.781	1
FSTL5	1119	7787	16	8891	5	10	0.31	0	0.51	0.031	31.25	12.53	3.48	2	4	0.781	0.781	1
IFT88	973	7813	36	8750	3	33	-0.12	-0.58	0.23	0.782	8.33	11.09	0.73	1	7	0.631	0.782	1
COL1A1	1963	6945	87	8823	16	69	-0.13	-0.65	0.29	0.782	18.39	22.07	0.82	9	17	0.0124	0.782	1
FRMPD1	1960	6822	13	8770	2	10	-0.07	-0.26	0.13	0.782	15.38	22.33	0.7	1	2	0.539	0.782	1
CTRL	950	4916	14	5852	2	12	-0.13	-0.5	0.25	0.782	14.29	16.2	0.86	2	1	0.0369	0.782	1
NOXO1	1275	7432	10	8697	1	9	0	-0.28	0.09	0.782	10	14.65	0.65	1	3	0.578	0.782	1
CATSPERG	1090	7584	12	8662	1	11	0	-0.31	0.1	0.784	8.33	12.57	0.63	1	3	0.498	0.784	1
ACOX1	1124	7453	42	8536	4	37	-0.1	-0.56	0.26	0.784	9.52	13.12	0.72	4	6	0.00369	0.784	1
SURF2	1290	6600	9	7882	1	7	0	-0.28	0.09	0.784	11.11	16.35	0.73	1	2	0.527	0.784	1
MYH10	2291	6612	81	8823	18	62	-0.18	-0.62	0.26	0.784	22.22	25.76	0.84	11	15	0.00199	0.784	1
QRICH2	1827	5024	13	6838	3	10	0	-0.26	0.19	0.693	23.08	26.67	0.82	1	3	0.784	0.784	1
BOC	1003	5767	10	6760	1	9	0	-0.35	0.12	0.784	10	14.82	0.64	1	3	0.578	0.784	1
WDHD1	960	7718	26	8652	7	19	0.47	0.12	0.82	0.0135	26.92	11.01	2.96	1	3	0.785	0.785	1
KRT10	2077	6831	20	8888	7	13	0.13	-0.09	0.38	0.171	35	23.29	1.77	2	4	0.785	0.785	1
PQLC2	1751	7130	13	8868	2	11	-0.07	-0.28	0.14	0.786	15.38	19.72	0.74	2	7	0.684	0.786	1
SYTL3	1240	7655	27	8868	5	22	0.09	-0.23	0.37	0.336	18.52	13.93	1.4	2	9	0.786	0.786	1
PSMC5	1565	6601	15	8151	5	10	0.16	-0.08	0.4	0.134	33.33	19.14	2.11	1	2	0.787	0.787	1
SMARCA4	970	5917	16	6872	5	10	0.36	0	0.6	0.0495	31.25	14.04	3.05	1	2	0.787	0.787	1
LCAT	1029	7876	25	8880	2	23	-0.11	-0.44	0.22	0.787	8	11.57	0.67	1	2	0.281	0.787	1
PI4KA	1634	5549	12	7171	2	10	-0.08	-0.32	0.16	0.788	16.67	22.76	0.68	1	1	0.356	0.788	1
RCC2	1045	6723	11	7757	1	10	0	-0.33	0.11	0.788	9.09	13.46	0.64	1	1	0.254	0.788	1
NOD1	1130	7721	11	8840	1	10	0	-0.3	0.1	0.79	9.09	12.77	0.68	1	2	0.403	0.79	1
SLC6A7	1346	7563	28	8881	5	23	0.09	-0.26	0.35	0.423	17.86	15.1	1.22	1	5	0.79	0.79	1
TIMELESS	1344	7564	18	8890	2	16	-0.09	-0.35	0.18	0.79	11.11	15.1	0.7	1	2	0.379	0.79	1
FOXR1	898	4288	16	5170	2	14	-0.13	-0.54	0.27	0.791	12.5	17.33	0.68	2	1	0.028	0.791	1
PLEKHG3	1034	5904	34	6904	4	30	-0.11	-0.63	0.28	0.791	11.76	14.92	0.76	2	8	0.418	0.791	1
RPA1	2457	6443	10	8890	2	8	-0.06	-0.2	0.11	0.793	20	27.62	0.66	1	1	0.421	0.793	1
KIF5A	1123	7785	23	8885	2	21	-0.1	-0.41	0.2	0.794	8.7	12.62	0.66	1	2	0.304	0.794	1
MCM7	1784	7118	12	8890	2	10	0	-0.21	0.14	0.708	16.67	20.04	0.8	1	4	0.794	0.794	1
DYNC2LI1	955	5888	11	6832	1	10	0	-0.37	0.12	0.794	9.09	13.96	0.62	1	3	0.535	0.794	1
PDXDC1	1084	7321	12	8393	2	10	0.11	-0.21	0.21	0.487	16.67	12.89	1.35	1	4	0.794	0.794	1
SLC25A39	1267	6833	27	8073	4	23	0	-0.37	0.28	0.632	14.81	15.64	0.94	1	6	0.794	0.794	1
RCVRN	2983	5748	8	8723	2	6	-0.05	-0.15	0.1	0.795	25	34.17	0.64	1	2	0.734	0.795	1
YME1L1	1124	7785	32	8878	7	24	0.31	-0.1	0.61	0.0797	21.88	12.58	2.02	1	4	0.796	0.796	1
TGM5	1030	5674	35	6669	4	31	-0.11	-0.69	0.29	0.799	11.43	15.38	0.71	1	4	0.531	0.799	1
TJP3	1856	7047	25	8878	4	21	-0.07	-0.37	0.17	0.8	16	20.86	0.72	2	2	0.102	0.8	1
NLRX1	1961	6945	25	8882	4	20	-0.07	-0.36	0.16	0.8	16	22.03	0.71	3	5	0.116	0.8	1
CELA2B	1936	6973	24	8885	4	20	-0.07	-0.36	0.16	0.801	16.67	21.74	0.72	1	4	0.701	0.801	1
TSR1	3470	5438	8	8900	3	5	0	-0.14	0.09	0.67	37.5	38.96	0.94	2	3	0.801	0.801	1
GIGYF2	1123	7787	42	8868	4	38	-0.1	-0.61	0.25	0.801	9.52	12.62	0.73	2	5	0.148	0.801	1
KLHDC8B	1504	7041	7	8538	2	5	0.08	-0.12	0.16	0.379	28.57	17.59	1.87	1	2	0.802	0.802	1
MFRP	2192	6718	23	8887	5	18	0	-0.3	0.18	0.688	21.74	24.61	0.85	1	4	0.802	0.802	1
MTHFD1L	1835	7074	7	8902	1	6	0	-0.21	0.07	0.802	14.29	20.6	0.64	1	2	0.587	0.802	1
TRPC4	1228	7663	22	8869	2	20	-0.09	-0.38	0.19	0.802	9.09	13.82	0.62	2	0	0.00167	0.802	1
PLD1	913	5731	23	6621	5	18	0.25	-0.25	0.57	0.228	21.74	13.71	1.74	1	4	0.802	0.802	1
TRAPPC2L	1256	6020	7	7269	2	5	0.1	-0.14	0.19	0.352	28.57	17.25	1.92	1	2	0.802	0.802	1
NLRP9	1014	7893	19	8888	2	17	0	-0.39	0.22	0.689	10.53	11.39	0.92	1	7	0.802	0.802	1
RORC	934	7974	19	8889	2	17	0	-0.36	0.24	0.589	10.53	10.48	1	1	7	0.802	0.802	1
AMBN	902	5772	7	6667	2	5	0.13	-0.13	0.26	0.218	28.57	13.5	2.56	1	2	0.802	0.802	1
AIFM3	1572	7333	17	8889	2	14	-0.08	-0.31	0.15	0.803	11.76	17.66	0.67	1	4	0.657	0.803	1
TFIP11	1614	7279	8	8885	1	7	0	-0.23	0.08	0.803	12.5	18.15	0.64	1	1	0.34	0.803	1
SPTLC3	1243	7663	39	8867	4	35	-0.09	-0.56	0.23	0.804	10.26	13.97	0.7	4	12	0.0525	0.804	1
TARBP1	2129	6770	12	8887	4	8	0.06	-0.12	0.25	0.302	33.33	23.91	1.59	1	2	0.804	0.804	1
KIAA1919	1014	7528	13	8529	1	12	0	-0.34	0.11	0.804	7.69	11.88	0.62	1	0	0.0754	0.804	1
CHL1	1183	7727	33	8878	3	29	-0.1	-0.49	0.19	0.804	9.09	13.29	0.68	2	8	0.319	0.804	1
ECE1	1126	5576	33	6670	4	28	-0.11	-0.64	0.27	0.805	12.12	16.82	0.71	4	5	0.00549	0.805	1
CCKBR	1491	7417	17	8891	2	15	-0.08	-0.32	0.16	0.805	11.76	16.75	0.66	2	0	0.00287	0.805	1
FUT1	1943	6963	35	8871	6	29	-0.13	-0.43	0.2	0.806	17.14	21.84	0.74	2	5	0.377	0.806	1
ADAM18	1284	7373	17	8640	2	15	-0.09	-0.37	0.18	0.807	11.76	14.84	0.77	2	4	0.193	0.807	1
PTER	997	7406	13	8390	1	12	0	-0.34	0.11	0.807	7.69	11.87	0.62	1	2	0.348	0.807	1
PDGFRB	1210	7556	15	8752	2	12	0	-0.29	0.19	0.586	13.33	13.8	1.04	1	5	0.808	0.808	1
PTK7	988	6350	14	7324	2	12	0	-0.35	0.23	0.62	14.29	13.46	1.07	1	5	0.808	0.808	1
ZNF214	1390	7516	14	8892	2	12	0	-0.26	0.17	0.691	14.29	15.61	0.9	1	5	0.808	0.808	1
IQCB1	1106	7350	19	8437	4	15	0.21	-0.21	0.42	0.248	21.05	13.06	1.77	1	4	0.808	0.808	1
PLA2G4C	1868	7038	8	8899	1	6	0	-0.2	0.07	0.809	12.5	20.98	0.63	1	1	0.383	0.809	1
KRT74	1041	7622	54	8610	5	48	-0.11	-0.71	0.33	0.81	9.26	12.03	0.76	3	8	0.069	0.81	1
SLFN13	1250	6666	9	7907	1	8	0	-0.29	0.1	0.811	11.11	15.8	0.67	1	3	0.627	0.811	1
RANGRF	3330	5572	6	8896	4	2	0.1	-0.02	0.19	0.125	66.67	37.39	3.35	2	1	0.812	0.812	1
THRA	1265	7629	16	8878	4	12	0.18	-0.09	0.37	0.179	25	14.2	2.01	2	6	0.812	0.812	1
EFNB3	1642	5302	13	6932	4	8	0.08	-0.16	0.32	0.277	30.77	23.63	1.61	2	4	0.812	0.812	1
MEGF10	1108	7747	23	8832	2	21	-0.1	-0.46	0.21	0.812	8.7	12.52	0.67	2	5	0.156	0.812	1
ALOXE3	2946	5957	73	8831	21	51	-0.15	-0.56	0.23	0.813	28.77	33.12	0.83	6	4	0.00929	0.813	1
URB2	1552	7250	9	8793	1	8	0	-0.23	0.08	0.813	11.11	17.64	0.58	1	1	0.306	0.813	1
PRSS12	898	6269	44	7124	4	39	-0.13	-0.76	0.32	0.814	9.09	12.55	0.72	2	6	0.188	0.814	1
KCNH2	1374	7497	41	8833	8	30	0.26	-0.17	0.52	0.172	19.51	15.46	1.46	2	9	0.815	0.815	1
COX10	2395	6513	15	8893	3	12	-0.06	-0.26	0.11	0.815	20	26.9	0.68	1	2	0.574	0.815	1
TMC4	1752	7154	18	8888	3	15	0	-0.28	0.14	0.72	16.67	19.68	0.82	1	5	0.815	0.815	1
MAP3K6	1859	7037	15	8881	3	12	0	-0.24	0.2	0.624	20	20.9	0.95	1	4	0.817	0.817	1
BIRC6	917	7960	66	8811	5	61	-0.24	-0.85	0.36	0.817	7.58	10.35	0.71	2	11	0.309	0.817	1
INSR	1477	6826	30	8274	4	25	-0.08	-0.49	0.16	0.817	13.33	17.8	0.74	2	6	0.367	0.817	1
SERPINB13	915	7992	36	8871	4	32	0	-0.43	0.43	0.512	11.11	10.27	1.09	1	9	0.817	0.817	1
PAM	1132	7772	16	8888	2	14	0	-0.3	0.2	0.633	12.5	12.71	0.98	1	6	0.818	0.818	1
FGD2	1610	7137	16	8731	2	14	-0.08	-0.3	0.15	0.818	12.5	18.42	0.63	1	2	0.421	0.818	1
RXFP2	1486	7361	25	8822	3	22	-0.08	-0.4	0.16	0.818	12	16.81	0.68	2	2	0.061	0.818	1
HSPB7	2405	6502	11	8896	2	9	-0.06	-0.23	0.11	0.819	18.18	27.01	0.6	1	2	0.578	0.819	1
ALAD	1630	7134	42	8722	6	36	-0.15	-0.53	0.23	0.819	14.29	18.62	0.73	2	7	0.431	0.819	1
UPK3A	1947	6957	19	8885	3	16	-0.07	-0.33	0.13	0.819	15.79	21.88	0.67	2	4	0.287	0.819	1
MST1	2547	6356	28	8875	6	22	-0.11	-0.36	0.16	0.82	21.43	28.63	0.68	2	2	0.172	0.82	1
RLBP1	1020	6144	22	7143	2	19	-0.11	-0.51	0.23	0.82	9.09	14.25	0.63	2	5	0.185	0.82	1
A4GNT	1399	7061	19	8442	2	16	-0.09	-0.34	0.17	0.82	10.53	16.55	0.63	2	5	0.246	0.82	1
LILRB4	1505	7355	26	8835	3	22	-0.08	-0.4	0.16	0.821	11.54	17	0.67	1	1	0.236	0.821	1
POLR2E	1853	6991	8	8836	1	7	0	-0.2	0.07	0.821	12.5	20.96	0.54	1	3	0.684	0.821	1
GNL2	1144	7544	12	8676	3	9	0.2	-0.1	0.3	0.192	25	13.15	2.2	1	3	0.821	0.821	1
ERBB2	1571	7337	24	8885	3	20	-0.08	-0.39	0.15	0.821	12.5	17.65	0.7	2	5	0.282	0.821	1
ENAM	915	5785	32	6670	3	27	-0.13	-0.63	0.25	0.821	9.38	13.67	0.7	1	6	0.652	0.821	1
ABCA4	2314	6595	227	8683	53	173	-0.29	-1.08	0.44	0.821	23.35	26.04	0.87	25	36	2.83e-05	0.821	1
CD300A	1425	7459	9	8875	2	7	0.08	-0.17	0.17	0.401	22.22	16.03	1.5	1	3	0.822	0.822	1
TRIM23	1171	6829	9	7991	2	7	0.1	-0.2	0.2	0.429	22.22	14.63	1.67	1	3	0.822	0.822	1
PRKCZ	984	6303	9	7278	2	7	0.12	-0.18	0.23	0.355	22.22	13.49	1.83	1	3	0.822	0.822	1
SLC41A3	1259	7650	11	8898	1	10	0	-0.28	0.09	0.822	9.09	14.14	0.61	1	4	0.651	0.822	1
JMJD4	943	6446	9	7380	2	7	0.12	-0.12	0.24	0.321	22.22	12.75	1.95	1	3	0.822	0.822	1
LGI3	1766	6224	18	7972	5	13	0.07	-0.18	0.29	0.349	27.78	22.09	1.36	1	3	0.822	0.822	1
PLXNA2	1596	7312	18	8890	5	13	0.15	-0.11	0.38	0.201	27.78	17.9	1.76	1	3	0.822	0.822	1
ITGAD	1064	7833	25	8872	2	23	-0.11	-0.48	0.21	0.823	8	11.97	0.64	2	1	0.0112	0.823	1
LTK	1826	7082	77	8832	13	63	-0.21	-0.69	0.28	0.823	16.88	20.53	0.8	6	19	0.231	0.823	1
CRMP1	1262	7638	30	8870	3	27	-0.09	-0.51	0.18	0.824	10	14.19	0.67	1	6	0.652	0.824	1
HSD17B4	1245	6247	33	7459	4	29	-0.1	-0.58	0.19	0.824	12.12	16.64	0.69	3	7	0.104	0.824	1
HSPB2	1094	6473	11	7556	1	10	0	-0.32	0.11	0.825	9.09	14.47	0.59	1	1	0.254	0.825	1
CDR2L	1319	7405	6	8718	1	5	0	-0.18	0.09	0.595	16.67	15.12	1.12	1	3	0.826	0.826	1
PTPN14	1237	7336	26	8548	4	21	0	-0.33	0.28	0.517	15.38	14.42	1.13	1	6	0.826	0.826	1
DECR2	1161	7092	6	8247	1	5	0	-0.2	0.1	0.585	16.67	14.07	1.22	1	3	0.826	0.826	1
CPNE5	1346	7561	6	8901	1	5	0	-0.18	0.09	0.63	16.67	15.11	1.12	1	3	0.826	0.826	1
SLCO1B1	988	7824	15	8797	1	14	-0.11	-0.34	0.11	0.827	6.67	11.22	0.57	1	3	0.412	0.827	1
GDF9	1170	7578	22	8726	2	20	-0.1	-0.44	0.2	0.827	9.09	13.39	0.65	1	7	0.734	0.827	1
GLDN	898	7523	41	8382	7	32	0.37	-0.12	0.75	0.115	17.07	10.63	1.83	1	6	0.827	0.827	1
MYPN	1820	7089	14	8895	2	12	-0.07	-0.28	0.14	0.828	14.29	20.44	0.65	1	1	0.308	0.828	1
HIST1H2AD	1356	6600	9	7947	1	8	0	-0.27	0.09	0.828	11.11	17.05	0.61	1	2	0.478	0.828	1
KIN	1515	7394	10	8900	1	8	0	-0.24	0.08	0.828	10	17.01	0.61	1	2	0.478	0.828	1
CHD1L	1468	7430	56	8842	7	49	-0.16	-0.65	0.24	0.829	12.5	16.52	0.72	6	5	4.07e-05	0.829	1
TULP1	1421	7475	10	8886	1	9	0	-0.25	0.08	0.829	10	15.98	0.58	1	1	0.278	0.829	1
UROS	1482	7143	24	8602	3	20	-0.08	-0.37	0.16	0.766	12.5	17.19	0.72	1	7	0.829	0.829	1
CAV3	913	5862	11	6766	3	6	0.25	-0.06	0.38	0.122	27.27	13.45	3.21	1	2	0.829	0.829	1
RIF1	1163	7444	34	8574	3	30	-0.1	-0.55	0.2	0.831	8.82	13.53	0.64	1	9	0.769	0.831	1
SLC26A11	2141	6758	85	8816	17	66	-0.18	-0.68	0.25	0.831	20	24.09	0.81	7	13	0.0531	0.831	1
ALPK1	1498	6780	19	8260	4	14	0.08	-0.2	0.33	0.393	21.05	18.09	1.29	1	4	0.832	0.832	1
ALDH1A1	963	7763	21	8706	3	17	0.12	-0.23	0.35	0.366	14.29	11.03	1.42	1	6	0.833	0.833	1
SSTR3	1722	6804	8	8518	1	7	0	-0.22	0.07	0.833	12.5	20.2	0.56	1	3	0.684	0.833	1
AFP	1179	7729	11	8897	2	9	0.1	-0.2	0.2	0.431	18.18	13.23	1.46	1	4	0.834	0.834	1
ITGAX	1127	7777	34	8871	3	30	-0.1	-0.56	0.2	0.834	8.82	12.67	0.69	1	6	0.61	0.834	1
TIRAP	1960	6734	7	8687	1	6	0	-0.2	0.07	0.834	14.29	22.55	0.57	1	1	0.383	0.834	1
ECM2	1086	6299	11	7375	1	9	-0.11	-0.32	0.11	0.835	9.09	14.71	0.64	1	1	0.278	0.835	1
MMP10	1308	7582	20	8870	2	18	-0.09	-0.4	0.18	0.835	10	14.72	0.64	2	7	0.344	0.835	1
MTMR4	1808	7098	72	8835	12	59	-0.21	-0.66	0.24	0.836	16.67	20.33	0.8	8	10	0.000488	0.836	1
CHRNA2	3029	5880	19	8890	5	14	-0.05	-0.28	0.1	0.836	26.32	34.02	0.69	3	0	0.000687	0.836	1
[truncated: 691 more rows]
