# Supplementary material for: Systematic discovery of germline cancer predisposition genes through the identification of somatic second hits
Source: Nat Commun. 2018 Jul 4;9:2601. doi: 10.1038/s41467-018-04900-7 (PMC6031629; doi:10.1038/s41467-018-04900-7)
Supplement: Supplementary file 14 — Supplementary Data 12 [file 41467_2018_4900_MOESM14_ESM.xlsx]

## Sheet: Sheet1
Supplementary Data 12. Pan-cancer rarePTV (protein truncation variant)-only-ALFRED analysis.
Gene	Num.of samples with AI	Num.of samples without AI	Num.of samples with rarePTVs	Num.of samples without rarePTVs	Num.of samples with rarePTVs in AI	Num.of samples with rarePTVs in noAI	Excess of rarePTVs in AI samples compared with noAI samples (%)	Lower_95% CI	Upper_95% CI	Random_P	Samples with AI in rarePTV samples (%)	Samples with AI in no-rarePTV samples (%)	Relative risk (RR)	Num.of samples with at least 10% increased VAF of rarePTVs in AI samples	Num.of samples with at least 10% increased VAF of rarePTVs in noAI samples	Binomial_P	ALFRED_P
BRCA2	1939	6969	63	8845	35	28	1.45	0.96	1.81	0	55.56	21.53	4.49	33	7	4.2e-17	4.2e-17
BRCA1	1239	6176	52	7364	40	12	3.1	2.52	3.49	0	76.92	16.28	18.13	38	3	1.36e-16	1.36e-16
ATM	1253	7653	32	8874	14	18	0.93	0.51	1.21	2e-05	43.75	13.96	4.75	13	3	5.74e-09	2e-05
TNFRSF13B	1669	7220	11	8878	7	4	0.37	0.15	0.52	0.00185	63.64	18.72	7.57	7	0	7.3e-07	0.00185
ACACB	1822	7081	17	8886	9	8	0.41	0.14	0.59	0.00302	52.94	20.4	4.37	5	0	2.1e-05	0.00302
KRT36	1075	7833	21	8887	7	14	0.53	0.11	0.74	0.00973	33.33	12.02	3.64	5	3	0.00944	0.00973
AIM1	1878	7031	23	8886	11	12	0.4	0.13	0.64	0.00392	47.83	21.01	3.43	4	1	0.0128	0.0128
MYH1	1132	7692	36	8789	10	26	0.51	0.1	0.91	0.0129	27.78	12.77	2.72	5	3	0.00733	0.0129
MSH3	1268	7634	12	8890	5	7	0.28	0.09	0.46	0.0178	41.67	14.21	4.3	5	0	1.01e-05	0.0178
GANC	1005	7903	21	8887	6	15	0.45	0.06	0.67	0.0225	28.57	11.24	3.15	5	0	1.29e-07	0.0225
TTC19	1524	6001	10	7515	6	4	0.33	0.08	0.49	0.00615	60	20.2	5.91	5	1	0.0288	0.0288
ABCA9	1233	7672	64	8842	14	50	0.56	0	0.99	0.0367	21.88	13.79	1.78	11	9	1.19e-06	0.0367
NLRP8	1679	7080	37	8722	12	25	0.37	0	0.66	0.037	32.43	19.11	2.02	7	7	0.00535	0.037
FAM166A	1326	7488	28	8786	11	17	0.62	0.27	0.89	0.00112	39.29	14.97	3.65	5	3	0.0452	0.0452
RPH3AL	1557	6522	11	8068	5	6	0.24	0	0.4	0.0457	45.45	19.24	3.49	4	1	0.00874	0.0457
ABCA4	2272	6637	18	8891	8	10	0.24	0	0.41	0.0531	44.44	25.46	2.34	5	1	0.000778	0.0531
ANGPTL6	1083	6519	16	7586	5	11	0.32	0	0.54	0.056	31.25	14.21	2.74	4	1	0.00297	0.056
PAPLN	1332	7544	25	8852	7	18	0.26	-0.04	0.53	0.0593	28	14.97	2.33	4	2	0.00753	0.0593
KRT24	1010	5547	30	6528	8	22	0.47	-0.06	0.82	0.0626	26.67	15.35	2.09	5	3	0.0073	0.0626
CES5A	1552	7349	31	8872	9	22	0.31	-0.04	0.59	0.0641	29.03	17.39	2.13	4	3	0.048	0.0641
SLC10A2	990	7773	14	8749	4	10	0.34	0	0.46	0.048	28.57	11.27	3.14	3	2	0.0645	0.0645
PASK	1741	7091	9	8823	6	3	0.29	0.14	0.43	0.00281	66.67	19.66	8.15	4	1	0.0706	0.0706
SHPK	2182	6726	18	8890	8	10	0.24	0	0.42	0.0442	44.44	24.45	2.47	4	2	0.0758	0.0758
USH2A	2554	6355	28	8881	12	16	0.22	-0.05	0.44	0.0881	42.86	28.62	1.87	6	3	0.0498	0.0881
MYH4	1770	4814	29	6557	11	18	0.31	-0.08	0.62	0.0924	37.93	26.83	1.87	8	1	8.47e-07	0.0924
ABCA10	1462	7444	29	8877	8	21	0.25	-0.08	0.57	0.0902	27.59	16.38	1.94	4	5	0.0993	0.0993
RGL4	1263	7343	11	8595	4	7	0.19	0	0.37	0.0713	36.36	14.65	3.32	3	2	0.104	0.104
NBN	1019	5100	17	6103	5	12	0.24	-0.12	0.59	0.113	29.41	16.61	2.27	4	2	0.0197	0.113
CNTN6	1650	7156	32	8774	9	23	0.22	-0.11	0.52	0.118	28.12	18.7	1.7	5	2	0.00108	0.118
ABCC12	1040	7864	22	8882	5	17	0.22	-0.11	0.54	0.119	22.73	11.65	2.22	4	3	0.0104	0.119
ZNF77	1280	7600	14	8866	4	10	0.18	-0.09	0.37	0.121	28.57	14.39	2.38	3	2	0.0645	0.121
SI	1512	7368	21	8860	6	15	0.24	-0.08	0.44	0.123	28.57	17	2.09	4	1	0.00273	0.123
CLEC10A	3463	5445	13	8895	9	4	0.19	0.02	0.33	0.0246	69.23	38.83	3.54	4	1	0.126	0.126
FER1L6	1310	7573	28	8856	7	21	0.27	-0.13	0.54	0.135	25	14.71	2.02	4	3	0.0146	0.135
TRAP1	1145	7747	16	8876	4	12	0.2	-0.1	0.4	0.15	25	12.85	2.26	3	4	0.139	0.15
PLB1	1616	7293	35	8874	9	26	0.23	-0.15	0.53	0.163	25.71	18.11	1.56	4	2	0.00859	0.163
CAPN9	1540	6932	29	8444	9	20	0.32	-0.04	0.6	0.0615	31.03	18.13	2.13	4	4	0.169	0.169
LTF	2221	6673	13	8881	5	8	0.12	-0.06	0.3	0.169	38.46	24.95	1.88	3	2	0.169	0.169
CPA1	1388	7511	15	8884	7	8	0.43	0.17	0.6	0.00388	46.67	15.54	4.73	5	4	0.188	0.188
USP6	2547	6354	17	8884	7	10	0.11	-0.11	0.3	0.191	41.18	28.59	1.75	6	2	0.0197	0.191
IQGAP3	1410	7499	22	8888	5	17	0.17	-0.13	0.42	0.19	22.73	15.81	1.66	3	4	0.193	0.193
PROCA1	1301	7246	8	8539	4	4	0.27	0.05	0.36	0.0221	50	15.19	5.57	3	2	0.199	0.199
ABCA8	929	7679	39	8570	6	33	0.24	-0.24	0.6	0.199	15.38	10.77	1.55	5	8	0.0113	0.199
ALKBH3	1092	7817	17	8892	5	12	0.31	0	0.52	0.041	29.41	12.22	2.98	3	3	0.201	0.201
WDR41	1371	7436	16	8791	4	12	0.17	-0.13	0.35	0.206	25	15.55	1.81	4	2	0.0307	0.206
DNAH8	2285	6622	39	8870	12	27	0.18	-0.18	0.44	0.22	30.77	25.63	1.39	5	2	0.00666	0.22
MMP1	1292	7597	28	8861	6	22	0.18	-0.18	0.45	0.221	21.43	14.51	1.6	4	2	0.00148	0.221
F12	1217	7344	20	8541	6	14	0.29	0	0.57	0.0468	30	14.18	2.59	4	7	0.235	0.235
ZNF607	961	7944	16	8889	3	13	0.12	-0.17	0.35	0.249	18.75	10.78	1.91	2	4	0.193	0.249
TNFRSF10B	1579	7282	20	8841	5	15	0.15	-0.15	0.35	0.259	25	17.8	1.54	3	4	0.193	0.259
CCDC38	1116	7502	21	8597	5	16	0.31	-0.1	0.51	0.103	23.81	12.92	2.1	3	5	0.266	0.266
OTOF	1266	7635	19	8882	4	15	0.09	-0.18	0.37	0.273	21.05	14.21	1.61	3	4	0.0595	0.273
LMO7	2296	6612	27	8881	9	18	0.12	-0.18	0.35	0.276	33.33	25.75	1.44	4	2	0.00945	0.276
C9orf156	994	6918	16	7896	4	12	0.23	-0.12	0.46	0.135	25	12.54	2.32	2	4	0.277	0.277
UBA7	1353	5601	34	6921	8	26	0.18	-0.28	0.55	0.281	23.53	19.43	1.32	4	7	0.182	0.281
SLC22A1	1916	6930	13	8833	4	9	0.07	-0.13	0.27	0.293	30.77	21.65	1.61	3	2	0.104	0.293
ZNF470	1733	7170	11	8892	4	7	0.14	-0.07	0.29	0.146	36.36	19.44	2.36	3	3	0.298	0.298
ABCC6	1188	7719	14	8893	4	10	0.19	-0.1	0.39	0.114	28.57	13.31	2.6	3	3	0.298	0.298
PKD2L1	1550	7046	11	8585	6	5	0.31	0.12	0.47	0.00528	54.55	17.98	5.45	3	2	0.303	0.303
PRDM7	1512	7384	28	8869	6	22	0.16	-0.2	0.4	0.305	21.43	16.98	1.4	3	4	0.147	0.305
COL7A1	1557	7280	12	8825	3	9	0.08	-0.16	0.23	0.329	25	17.61	1.56	2	3	0.239	0.329
RNASEL	1027	7872	14	8886	3	11	0.22	-0.11	0.33	0.197	21.43	11.52	2.3	2	3	0.334	0.334
LAMB4	1070	6338	21	7388	4	17	0.11	-0.22	0.44	0.338	19.05	14.43	1.48	3	2	0.0334	0.338
EXPH5	1450	7459	19	8890	4	15	0.08	-0.21	0.33	0.363	21.05	16.27	1.37	4	2	0.00685	0.363
SFXN3	1830	6993	20	8803	5	15	0.07	-0.21	0.28	0.386	25	20.73	1.27	3	3	0.106	0.386
ALDH1L2	1149	7335	31	8453	5	26	0.1	-0.3	0.4	0.397	16.13	13.53	1.23	3	4	0.0958	0.397
NBPF3	1295	7604	23	8876	4	19	0.09	-0.27	0.36	0.4	17.39	14.54	1.24	2	3	0.251	0.4
HSPA8	928	4070	7	4991	2	5	0.13	-0.2	0.26	0.401	28.57	18.55	1.75	3	2	0.0935	0.401
GBP1	1311	7408	16	8704	3	13	0.09	-0.18	0.27	0.401	18.75	15.03	1.41	3	3	0.0508	0.401
MYO9A	897	8007	21	8883	6	15	0.5	0.12	0.74	0.0107	28.57	10.03	3.57	2	3	0.408	0.408
ALOX15B	3094	5637	12	8719	5	7	0.05	-0.13	0.2	0.408	41.67	35.43	1.3	4	4	0.344	0.408
TG	2291	6618	28	8881	8	20	0.06	-0.24	0.29	0.426	28.57	25.71	1.16	3	2	0.0775	0.426
GDPD4	1206	7702	13	8895	3	10	0.1	-0.14	0.29	0.257	23.08	13.52	1.92	2	4	0.43	0.43
INSRR	1022	7841	19	8844	4	15	0.22	-0.11	0.44	0.157	21.05	11.51	2.05	2	4	0.433	0.433
GLB1L2	1759	6909	13	8655	5	8	0.21	-0.04	0.36	0.0979	38.46	20.27	2.45	3	3	0.433	0.433
PCK2	2277	6631	41	8867	11	30	0.06	-0.29	0.35	0.454	26.83	25.56	1.07	3	4	0.221	0.454
RSPH1	1262	7408	17	8653	3	14	0.09	-0.23	0.28	0.458	17.65	14.55	1.26	2	4	0.287	0.458
ENO3	2964	5739	21	8682	8	13	0.05	-0.2	0.26	0.467	38.1	34.05	1.19	3	2	0.0522	0.467
CD109	1628	7265	19	8874	4	15	0.08	-0.23	0.26	0.467	21.05	18.3	1.19	2	3	0.275	0.467
ATP1A4	1985	6924	30	8880	7	23	0.06	-0.26	0.29	0.479	23.33	22.27	1.11	2	4	0.368	0.479
KCTD17	1762	7139	13	8888	3	10	0.07	-0.18	0.21	0.482	23.08	19.79	1.22	2	3	0.282	0.482
MSH4	1693	7210	14	8890	3	11	0.07	-0.18	0.22	0.484	21.43	19.01	1.28	2	3	0.295	0.484
XDH	1269	7640	32	8877	5	27	0.09	-0.37	0.37	0.487	15.62	14.24	1.11	3	5	0.0795	0.487
C17orf80	2052	6831	21	8863	5	16	0.06	-0.22	0.25	0.5	23.81	23.1	1.11	3	2	0.0527	0.5
GPR151	967	7920	15	8872	2	13	0	-0.23	0.23	0.504	13.33	10.88	1.26	2	4	0.386	0.504
POLN	884	4623	17	5490	3	14	0	-0.4	0.4	0.505	17.65	16.05	1.12	2	4	0.398	0.505
MSH6	1083	7826	8	8901	2	6	0.11	-0.11	0.21	0.255	25	12.14	2.41	2	3	0.506	0.506
KCNAB3	1609	7121	15	8716	3	12	0	-0.23	0.23	0.51	20	18.43	1.21	4	2	0.0109	0.51
OR51G2	1344	7565	11	8898	2	9	0	-0.18	0.18	0.52	18.18	15.08	1.25	2	3	0.206	0.52
DHTKD1	1212	7696	20	8888	3	17	0	-0.29	0.29	0.533	15	13.6	1.12	3	2	0.0135	0.533
C9orf152	949	7906	14	8842	3	11	0.24	-0.12	0.35	0.161	21.43	10.7	2.5	2	4	0.54	0.54
ASPM	1599	7310	27	8882	5	22	0	-0.3	0.3	0.544	18.52	17.95	1.04	2	5	0.354	0.544
DNAH9	4100	4808	19	8889	9	10	0	-0.18	0.2	0.545	47.37	46.02	1.06	4	1	0.0214	0.545
PIBF1	1351	6920	11	8260	2	9	0	-0.22	0.18	0.549	18.18	16.33	1.14	2	3	0.239	0.549
PKHD1	2128	6781	22	8887	9	13	0.25	0	0.46	0.0538	40.91	23.84	2.21	2	3	0.55	0.55
PCDHAC1	1103	6270	21	7354	3	18	0	-0.32	0.32	0.555	14.29	14.96	1.07	4	1	0.000282	0.555
STAB1	2564	6345	21	8889	6	15	0	-0.22	0.22	0.517	28.57	28.78	1.06	2	3	0.555	0.555
HHIPL2	1849	7055	22	8882	5	17	0	-0.27	0.24	0.56	22.73	20.76	1.12	2	3	0.449	0.56
MICAL1	1543	5621	26	7139	11	15	0.5	0.12	0.74	0.00921	42.31	21.46	2.86	3	4	0.566	0.566
FANCA	2341	5806	14	8134	4	10	0	-0.18	0.18	0.571	28.57	28.73	1.1	3	2	0.081	0.571
HAL	1651	7257	27	8881	5	22	0	-0.3	0.26	0.575	18.52	18.53	1	3	2	0.0123	0.575
C2CD3	1041	5941	20	6962	3	17	0	-0.4	0.34	0.585	15	14.91	1.01	3	6	0.223	0.585
ZNF544	999	7399	17	8382	2	15	0	-0.34	0.23	0.59	11.76	11.89	1.06	2	4	0.315	0.59
FCRL6	1213	7681	17	8877	3	14	0.1	-0.24	0.29	0.44	17.65	13.63	1.36	1	4	0.602	0.602
FGL1	1408	7073	7	8474	2	5	0.09	-0.09	0.17	0.307	28.57	16.59	2.01	2	3	0.624	0.624
DCST2	1415	7488	19	8884	3	16	0	-0.29	0.25	0.626	15.79	15.89	0.99	2	3	0.331	0.626
SDHB	2129	6776	5	8900	4	1	0.19	0.06	0.25	0.0124	80	23.88	12.73	4	1	0.633	0.633
ZNF547	1499	7407	19	8887	3	16	0	-0.28	0.24	0.639	15.79	16.83	0.93	2	3	0.19	0.639
ABCC2	1616	7292	24	8884	4	20	0	-0.3	0.23	0.645	16.67	18.14	0.9	2	5	0.212	0.645
ALPK2	2755	6152	17	8890	5	12	0	-0.21	0.16	0.649	29.41	30.93	0.93	3	2	0.0817	0.649
TTC5	1038	7848	20	8867	2	18	0	-0.33	0.22	0.65	10	11.68	0.89	1	5	0.641	0.65
WRN	2248	6661	13	8896	3	10	0	-0.21	0.15	0.654	23.08	25.24	0.89	3	2	0.039	0.654
ZNF214	1381	7524	13	8892	2	11	0	-0.26	0.17	0.629	15.38	15.51	0.99	1	4	0.657	0.657
TATDN1	928	6325	14	7239	2	12	0	-0.31	0.25	0.535	14.29	12.79	1.14	1	4	0.657	0.657
TRIM16L	2114	6646	18	8742	4	14	0	-0.25	0.19	0.663	22.22	24.14	0.9	3	2	0.0355	0.663
LZTR1	2157	6747	17	8888	5	12	0.06	-0.15	0.24	0.363	29.41	24.21	1.42	2	4	0.674	0.674
LAMA2	2327	6582	22	8888	5	17	0	-0.26	0.17	0.676	22.73	26.13	0.88	2	3	0.359	0.676
DNAH3	1506	7402	48	8862	7	41	-0.08	-0.48	0.32	0.683	14.58	16.91	0.88	3	2	0.0054	0.683
PAPL	969	7639	20	8588	3	17	0.12	-0.23	0.35	0.39	15	11.25	1.39	1	4	0.684	0.684
DNAH5	2669	6240	33	8876	9	24	-0.05	-0.32	0.21	0.689	27.27	29.97	0.88	4	4	0.0857	0.689
EMR1	1786	7122	18	8891	3	15	0	-0.28	0.18	0.691	16.67	20.05	0.85	3	2	0.0096	0.691
ATP10D	1290	7614	16	8888	2	14	0	-0.27	0.18	0.694	12.5	14.49	0.84	1	4	0.629	0.694
MYO3A	1938	6447	22	8365	4	18	0	-0.3	0.2	0.698	18.18	23.12	0.83	1	4	0.619	0.698
ATP8B4	1196	7712	19	8890	2	17	0	-0.34	0.19	0.699	10.53	13.43	0.81	3	4	0.0379	0.699
TAS2R14	1024	7858	11	8871	1	10	0	-0.28	0.11	0.706	9.09	11.53	0.77	1	4	0.572	0.706
TRPA1	1194	7062	23	8233	3	20	0	-0.39	0.24	0.712	13.04	14.47	0.89	2	4	0.203	0.712
GEN1	1061	7846	10	8897	1	9	0	-0.27	0.11	0.731	10	11.91	0.82	1	4	0.651	0.731
CGN	1279	7621	19	8881	4	15	0.09	-0.18	0.37	0.322	21.05	14.36	1.59	1	4	0.733	0.733
P2RX5	3633	5275	8	8900	3	5	0	-0.14	0.09	0.735	37.5	40.79	0.87	5	1	0.00464	0.735
DZIP1L	1276	7484	17	8743	2	15	0	-0.32	0.18	0.735	11.76	14.57	0.78	1	4	0.629	0.735
ENAM	896	5796	20	6673	2	18	0	-0.52	0.26	0.736	10	13.4	0.76	1	4	0.578	0.736
MCM7	1772	7130	12	8890	2	10	0	-0.21	0.14	0.704	16.67	19.91	0.8	1	4	0.756	0.756
KIF15	1365	7538	17	8886	4	13	0.09	-0.17	0.35	0.261	23.53	15.32	1.7	1	4	0.76	0.76
OVGP1	1459	5175	18	6616	3	15	-0.09	-0.4	0.18	0.77	16.67	22.01	0.71	2	3	0.19	0.77
SEC31B	1198	4040	28	5210	5	23	-0.11	-0.65	0.32	0.779	17.86	22.9	0.73	2	3	0.272	0.779
FLG	1742	6500	102	8141	18	84	-0.15	-0.76	0.33	0.784	17.65	21.18	0.81	15	8	1.37e-10	0.784
DCHS2	2013	6896	28	8881	5	23	-0.06	-0.39	0.19	0.786	17.86	22.61	0.74	3	2	0.00688	0.786
MMP10	1292	7597	19	8870	2	17	-0.09	-0.36	0.18	0.807	10.53	14.54	0.69	2	7	0.525	0.807
ALPK1	1480	6796	19	8258	4	15	0.08	-0.21	0.33	0.382	21.05	17.87	1.31	1	4	0.808	0.808
ABCG2	896	7989	31	8854	2	29	-0.12	-0.56	0.25	0.809	6.45	10.1	0.61	1	6	0.375	0.809
CCDC7	1353	7552	21	8884	2	19	-0.09	-0.39	0.17	0.814	9.52	15.21	0.59	4	2	0.00127	0.814
ECE2	1386	7520	19	8887	2	17	-0.09	-0.34	0.17	0.816	10.53	15.57	0.64	1	5	0.495	0.816
NLRP2	1910	6725	25	8610	4	21	-0.07	-0.4	0.13	0.835	16	22.14	0.67	2	9	0.716	0.835
MYH8	1900	7007	23	8884	6	17	0.07	-0.2	0.33	0.35	26.09	21.32	1.3	1	4	0.849	0.849
RRP8	2428	6481	21	8889	4	17	-0.06	-0.31	0.11	0.85	19.05	27.27	0.67	1	5	0.767	0.85
GALNT8	902	6852	16	7738	1	15	-0.13	-0.44	0.13	0.859	6.25	11.64	0.51	1	5	0.641	0.859
PKD1L1	2117	6792	32	8878	10	22	0.19	-0.12	0.43	0.176	31.25	23.73	1.53	2	5	0.863	0.863
LRRC8E	1426	7471	14	8883	5	9	0.25	0	0.42	0.0531	35.71	16	2.91	2	5	0.869	0.869
KCNH6	1734	7115	9	8840	1	8	-0.07	-0.25	0.07	0.88	11.11	19.6	0.51	2	3	0.239	0.88
AASDH	1052	6887	20	7920	5	15	0.33	-0.05	0.55	0.0896	25	13.22	2.34	1	4	0.882	0.882
VPS13B	1111	7751	18	8845	1	17	-0.1	-0.41	0.1	0.892	5.56	12.55	0.44	1	4	0.602	0.892
PZP	1627	7281	28	8881	3	25	-0.15	-0.45	0.15	0.894	10.71	18.29	0.56	2	4	0.209	0.894
TRIOBP	1710	7166	25	8851	3	22	-0.14	-0.43	0.11	0.896	12	19.29	0.57	1	4	0.646	0.896
CCDC66	1593	7316	30	8879	7	23	0.15	-0.19	0.42	0.264	23.33	17.86	1.4	1	7	0.898	0.898
C9orf84	1898	7011	16	8893	2	14	-0.07	-0.33	0.07	0.901	12.5	21.32	0.53	1	4	0.51	0.901
TTC3	1711	7193	20	8884	5	15	0.07	-0.18	0.29	0.33	25	19.2	1.4	1	5	0.904	0.904
PTPRH	2022	6884	38	8868	6	32	-0.19	-0.51	0.13	0.905	15.79	22.73	0.64	3	5	0.126	0.905
C5orf45	1855	6698	24	8529	11	13	0.41	0.1	0.65	0.00684	45.83	21.62	3.06	2	5	0.908	0.908
EVC2	1222	7228	11	8439	2	9	0.1	-0.19	0.19	0.499	18.18	14.46	1.31	1	5	0.914	0.914
NRAP	2837	6072	39	8870	9	30	-0.16	-0.49	0.1	0.914	23.08	31.88	0.64	2	4	0.202	0.914
PQLC2	1747	7134	6	8875	1	5	0	-0.14	0.07	0.739	16.67	19.67	0.82	1	4	0.938	0.938
MYOM2	3495	5414	29	8880	8	21	-0.19	-0.42	0.07	0.942	27.59	39.27	0.59	4	4	0.07	0.942
HIST1H4B	1723	6556	8	8271	2	6	0	-0.15	0.15	0.516	25	20.81	1.27	1	4	0.954	0.954
IGHMBP2	1141	7524	10	8655	4	6	0.3	0	0.4	0.0323	40	13.14	4.4	1	4	0.984	0.984
EPX	1334	5965	31	7268	1	30	-0.37	-0.83	-0.09	0.998	3.23	18.34	0.15	0	6	1	1
TOR3A	1027	7345	13	8359	1	12	-0.11	-0.39	0.11	0.848	7.69	12.27	0.6	0	5	1	1
NOX3	1382	7366	11	8737	0	11	-0.17	-0.39	0	1	0	15.82	0	1	5	0.707	1
ADAMTSL4	1166	7735	8	8893	2	6	0.1	-0.1	0.2	0.295	25	13.09	2.21	0	5	1	1
NLRP9	1001	7905	12	8894	1	11	0	-0.34	0.11	0.778	8.33	11.24	0.72	0	5	1	1
EGF	1117	7530	9	8638	0	9	-0.1	-0.31	0	1	0	12.93	0	1	4	0.572	1
LTK	1819	7089	21	8887	2	19	-0.14	-0.41	0.07	0.947	9.52	20.45	0.41	0	5	1	1
MRPS15	1779	7120	18	8881	2	16	-0.14	-0.35	0.07	0.906	11.11	20.01	0.5	0	5	1	1
CD163L1	964	7944	17	8891	2	15	0	-0.29	0.23	0.546	11.76	10.82	1.1	0	5	1	1
