# Supplementary material for: Systematic discovery of germline cancer predisposition genes through the identification of somatic second hits
Source: Nat Commun. 2018 Jul 4;9:2601. doi: 10.1038/s41467-018-04900-7 (PMC6031629; doi:10.1038/s41467-018-04900-7)
Supplement: Supplementary file 15 — Supplementary Data 13 [file 41467_2018_4900_MOESM15_ESM.xlsx]

## Sheet: Sheet1
Supplementary Data 13. RarePTV-only-ALFRED analysis in 17 individual cancer types.
Cancer type	Gene	Num.of samples with AI	Num.of samples without AI	Num.of samples with rarePTVs	Num.of samples without rarePTVs	Num.of samples with rarePTVs in AI	Num.of samples with rarePTVs in noAI	Excess of rarePTVs in AI samples compared with noAI samples (%)	Lower_95% CI	Upper_95% CI	Random_P	Samples with AI in rarePTV samples (%)	Samples with AI in no-rarePTV samples (%)	Relative risk (RR)	Num.of samples with at least 10% increased VAF of rarePTVs in AI samples	Num.of samples with at least 10% increased VAF of rarePTVs in noAI samples	Binomial_P	ALFRED_P
BLCA	TUSC3	50	195	2	243	1	1	2.51	-2.51	2.51	0.325	50	20.16	3.9	1	0	0.438	0.438
BLCA	TRIM16L	104	254	4	354	1	3	0	-2.71	1.36	0.77	25	29.1	0.81	1	1	0.609	0.77
BLCA	HLA-G	46	251	2	295	1	1	2.57	-2.57	2.57	0.328	50	15.25	5.46	1	1	0.938	0.938
BLCA	LEPRE1	43	318	2	359	2	0	5.28	2.64	5.28	0.0144	100	11.42	0	2	0	0.5	0.5
BLCA	LAMB4	41	258	2	297	1	1	2.83	-1.41	2.83	0.304	50	13.47	6.29	1	0	0.438	0.438
BLCA	FLG	82	256	5	333	1	4	1.61	-1.61	1.61	0.448	20	24.32	0.78	2	1	0.216	0.448
BLCA	IQGAP3	65	296	2	359	2	0	3.75	0.94	3.75	0.0248	100	17.55	0	1	0	0.875	0.875
BLCA	TRAP1	67	294	2	359	2	0	3.67	1.83	3.67	0.0129	100	18.11	0	2	0	0.5	0.5
BLCA	ZNF347	61	299	2	358	2	0	3.95	0	3.95	0.0359	100	16.48	0	1	0	0.875	0.875
BLCA	C5orf45	101	247	2	346	1	1	1.39	-1.39	1.39	0.469	50	28.9	2.45	1	0	0.438	0.469
BLCA	C16orf46	45	316	2	359	1	1	2.54	0	2.54	0.218	50	12.26	7.02	1	0	0.438	0.438
BLCA	CAPN9	65	275	3	337	1	2	1.9	-1.9	1.9	0.472	33.33	18.99	2.12	1	0	0.306	0.472
BLCA	GBGT1	141	220	2	359	2	0	1.16	0	2.33	0.181	100	38.72	0	1	0	0.75	0.75
BLCA	BRCA2	60	301	2	359	1	1	2	-2	2	0.366	50	16.43	5.02	2	0	0.156	0.366
BLCA	GNPTG	64	297	2	359	1	1	1.9	0	1.9	0.259	50	17.55	4.64	1	0	0.438	0.438
BLCA	ATP10D	58	303	2	359	1	1	2.05	-1.03	2.05	0.274	50	15.88	5.22	1	0	0.438	0.438
BLCA	SLC26A2	64	297	2	359	1	1	1.9	-1.9	1.9	0.353	50	17.55	4.64	1	0	0.438	0.438
BLCA	EXPH5	73	288	2	359	1	1	1.72	-1.72	1.72	0.366	50	20.06	3.95	1	1	0.938	0.938
BLCA	PLCD1	41	163	2	202	2	0	6.11	0	6.11	0.0364	100	19.31	0	2	0	0.5	0.5
BLCA	USP31	49	312	2	359	1	1	2.36	-1.18	2.36	0.272	50	13.37	6.37	1	0	0.438	0.438
BLCA	HRG	62	299	2	359	2	0	1.95	0	3.89	0.0891	100	16.71	0	1	0	0.875	0.875
BLCA	FAM154A	89	253	2	340	1	1	1.52	-1.52	1.52	0.401	50	25.88	2.84	1	0	0.438	0.438
BLCA	ODAM	44	257	2	299	1	1	2.66	-1.33	2.66	0.295	50	14.38	5.84	1	0	0.438	0.438
BLCA	DOPEY2	84	277	3	358	2	1	1.55	0	3.1	0.121	66.67	22.91	6.6	2	0	0.156	0.156
BLCA	LMO7	87	274	2	359	1	1	1.51	0	1.51	0.244	50	23.96	3.15	1	0	0.306	0.306
BLCA	ABCA4	81	280	3	358	1	2	0	-1.59	1.59	0.557	33.33	22.35	1.73	1	0	0.306	0.557
BLCA	COL6A1	55	306	2	359	1	1	2.14	-1.07	2.14	0.301	50	15.04	5.56	1	0	0.438	0.438
BLCA	NMI	70	242	2	310	1	1	1.84	-1.84	1.84	0.429	50	22.26	3.46	1	0	0.438	0.438
BLCA	ABCA9	48	313	5	356	2	3	2.4	-1.2	4.81	0.146	40	12.92	4.35	2	0	0.043	0.146
BRCA	CLEC10A	453	451	3	901	3	0	0.88	0	1.33	0.101	100	49.94	0	2	0	0.688	0.688
BRCA	MARCH10	121	783	3	901	1	2	0.95	-0.95	0.95	0.3	33.33	13.32	3.24	1	1	0.75	0.75
BRCA	TMC7	131	769	6	895	3	3	1.79	0	2.68	0.0302	50	14.3	8.81	2	0	0.0789	0.0789
BRCA	MMP10	227	674	3	898	1	2	0	-0.59	0.59	0.575	33.33	25.17	1.48	1	2	0.802	0.802
BRCA	GNPTAB	102	638	4	736	1	3	0	-1.14	1.14	0.511	25	13.72	2.08	1	3	0.984	0.984
BRCA	ATM	243	660	8	895	7	1	2.82	1.69	3.94	7.4e-05	87.5	26.37	19.01	6	0	0.00423	0.00423
BRCA	TMCO4	192	704	3	893	3	0	1.33	0.66	1.99	0.0124	100	21.16	0	2	0	0.688	0.688
BRCA	GPT	130	758	3	885	1	2	0.9	-0.9	0.9	0.433	33.33	14.58	2.92	1	1	0.75	0.75
BRCA	ZMYND15	496	408	3	901	1	2	-0.45	-0.89	0.45	0.919	33.33	54.94	0.41	1	1	0.75	0.919
BRCA	CLCA2	210	694	3	901	1	2	0	-0.62	0.62	0.548	33.33	23.2	1.65	1	1	0.75	0.75
BRCA	FLG	300	545	11	834	2	9	-1.03	-2.33	0.52	0.943	18.18	35.73	0.4	2	2	0.131	0.943
BRCA	MYH4	265	407	3	669	3	0	1.25	0	1.87	0.0908	100	39.16	0	2	0	0.688	0.688
BRCA	TSR1	456	448	3	901	3	0	0.44	0	1.33	0.173	100	50.28	0	2	0	0.688	0.688
BRCA	GLDC	155	697	3	849	2	1	1.58	0	1.58	0.097	66.67	18.02	8.99	2	0	0.156	0.156
BRCA	TTC16	109	672	3	778	1	2	1.07	-0.53	1.07	0.272	33.33	13.88	3.08	1	1	0.75	0.75
BRCA	FANCM	99	394	7	486	4	3	3.79	0.63	5.06	0.0234	57.14	19.55	5.31	3	1	0.152	0.152
BRCA	OR8K5	102	802	3	901	0	3	0	-2.21	0	1	0	11.32	0	1	1	0.609	1
BRCA	BRCA1	213	558	13	758	10	3	3.89	1.95	5.84	0.000198	76.92	26.78	8.73	10	2	0.0432	0.0432
BRCA	BRCA2	261	643	17	887	10	7	2.69	0.54	4.58	0.0089	58.82	28.3	3.52	9	2	0.000126	0.0089
BRCA	TOP1MT	226	666	4	888	1	3	0	-1.19	0.59	0.715	25	25.34	0.98	1	1	0.609	0.715
BRCA	KRT24	185	490	7	668	2	5	0	-1.49	1.49	0.59	28.57	27.4	1.06	1	1	0.578	0.59
BRCA	MUC17	154	741	6	889	5	1	3.14	1.57	3.92	0.000946	83.33	16.76	24.06	3	0	0.104	0.104
BRCA	ADAM7	164	407	3	568	1	2	0	-1.71	0.86	0.726	33.33	28.7	1.24	1	1	0.75	0.75
BRCA	LMO7	302	602	6	898	4	2	0.99	0	1.99	0.1	66.67	33.18	3.99	3	0	0.104	0.104
BRCA	C3orf20	180	714	3	891	1	2	0	-0.7	0.7	0.502	33.33	20.09	1.98	1	1	0.75	0.75
BRCA	PRDM7	329	575	9	896	3	6	0	-1.19	1.19	0.582	33.33	36.38	1.05	2	0	0.0586	0.582
BRCA	CDK5RAP2	161	743	4	900	1	3	0	-0.76	0.76	0.52	25	17.78	1.54	1	1	0.756	0.756
BRCA	GPR112	165	644	3	806	1	2	0.76	-0.76	0.76	0.471	33.33	20.35	1.95	2	1	0.5	0.5
BRCA	PTPRH	192	712	9	895	1	8	-0.66	-2.31	0.66	0.87	11.11	21.34	0.46	1	1	0.421	0.87
CESC	HSD17B13	26	211	2	235	1	1	4.32	0	4.32	0.215	50	10.64	8.12	1	0	0.438	0.438
CESC	SERPINA10	39	196	2	233	1	1	3.07	0	3.07	0.261	50	16.31	5.03	1	1	0.938	0.938
CESC	DNAH9	80	157	2	235	1	1	0	-1.89	1.89	0.582	50	33.62	1.96	1	0	0.438	0.582
CESC	NEBL	28	208	2	234	0	2	0	-4.05	0	1	0	11.97	0	1	0	0.306	1
CESC	USH2A	80	157	3	234	2	1	1.89	-1.89	3.77	0.264	66.67	33.33	3.92	1	1	0.996	0.996
CESC	ZNF221	46	191	2	235	1	1	2.7	-1.35	2.7	0.316	50	19.15	4.15	1	0	0.438	0.438
CESC	DNAH5	120	117	3	234	2	1	0	-1.69	3.38	0.503	66.67	50.43	1.95	1	1	0.996	0.996
CESC	KATNAL2	49	188	2	235	1	1	2.57	-2.57	2.57	0.383	50	20.43	3.84	1	0	0.306	0.383
CESC	HFM1	26	211	2	235	1	1	4.32	0	4.32	0.24	50	10.64	8.12	1	0	0.306	0.306
CESC	HPS3	67	170	3	234	1	2	0	-2.08	2.08	0.556	33.33	28.21	1.27	1	0	0.306	0.556
CESC	ABCC3	35	201	2	234	2	0	6.71	1.68	6.71	0.0204	100	14.1	0	2	0	0.5	0.5
CESC	GCNT2	29	208	2	235	1	1	3.93	0	3.93	0.247	50	11.91	7.17	1	0	0.438	0.438
CESC	LILRA1	25	209	2	232	1	1	0	-4.48	0	1	50	10.34	8.36	1	0	0.438	1
COADREAD	LAMB4	49	323	3	369	1	2	2.35	-1.18	2.35	0.276	33.33	13.01	3.3	1	0	0.306	0.306
COADREAD	PAPLN	78	361	2	437	1	1	1.56	-0.78	1.56	0.31	50	17.62	4.63	1	0	0.438	0.438
COADREAD	SLCO1B3	49	386	2	433	1	1	2.3	-1.15	2.3	0.286	50	11.09	7.88	1	0	0.438	0.438
COADREAD	CNTN6	72	374	2	444	1	1	1.66	-0.83	1.66	0.296	50	15.99	5.19	1	0	0.438	0.438
COADREAD	NLRP12	54	393	2	445	1	1	2.11	-1.05	2.11	0.267	50	11.91	7.28	1	0	0.438	0.438
COADREAD	HAL	106	344	2	448	1	1	0	-1.23	1.23	0.562	50	23.44	3.25	1	0	0.438	0.562
COADREAD	ANKRD12	111	310	2	419	2	0	2.45	0	2.45	0.0626	100	26.01	0	1	0	0.875	0.875
COADREAD	ZNF77	61	387	3	445	2	1	3.8	0	3.8	0.1	66.67	13.26	12.69	2	0	0.156	0.156
COADREAD	SLC37A2	59	374	2	431	1	1	1.96	-1.96	1.96	0.431	50	13.46	6.34	1	1	0.938	0.938
COADREAD	FAM161B	111	336	2	445	1	1	1.2	-1.2	1.2	0.441	50	24.72	3.03	1	0	0.438	0.441
COADREAD	FASTKD3	53	386	2	437	1	1	2.15	0	2.15	0.21	50	11.9	7.28	1	0	0.438	0.438
COADREAD	MICAL1	63	296	3	357	1	2	1.93	-0.96	1.93	0.274	33.33	17.37	4.7	1	1	0.938	0.938
COADREAD	XDH	83	367	6	444	2	4	1.48	-1.48	2.95	0.341	33.33	18.24	2.21	2	1	0.216	0.341
COADREAD	ATRIP	58	297	3	352	1	2	2.06	-2.06	2.06	0.371	33.33	16.19	2.56	1	1	0.75	0.75
COADREAD	NBN	75	244	2	317	1	1	1.74	-1.74	1.74	0.485	50	23.34	3.25	1	0	0.438	0.485
COADREAD	SLC47A2	189	242	4	427	2	2	0	-1.41	1.88	0.508	50	43.79	1.28	1	0	0.306	0.508
COADREAD	CAPN9	74	356	3	428	2	1	3.26	0.82	3.26	0.0234	66.67	16.82	0	1	0	0.875	0.875
COADREAD	TNS4	62	307	2	367	2	0	3.88	0	3.88	0.0328	100	16.35	0	1	0	0.875	0.875
COADREAD	HEATR4	61	363	3	421	1	2	0	-1.91	1.91	0.531	33.33	14.25	2.98	1	0	0.306	0.531
COADREAD	TMPRSS3	92	351	2	441	1	1	1.37	-1.37	1.37	0.474	50	20.63	3.82	1	0	0.438	0.474
COADREAD	MAN2C1	63	380	2	441	1	1	1.85	-1.85	1.85	0.383	50	14.06	6.03	1	1	0.75	0.75
COADREAD	ALOXE3	177	272	2	447	1	1	0	-0.93	0.93	0.606	50	39.37	1.54	1	0	0.438	0.606
COADREAD	C17orf80	115	331	3	444	1	2	1.17	-1.17	1.17	0.422	33.33	25.68	2.88	1	0	0.438	0.438
COADREAD	ABCA1	65	382	3	444	1	2	1.8	-1.8	1.8	0.399	33.33	14.41	2.94	1	1	0.75	0.75
COADREAD	PLA2R1	55	387	2	440	1	1	2.08	0	2.08	0.231	50	12.27	7.04	1	0	0.438	0.438
COADREAD	UBA7	54	297	4	348	1	3	2.19	-2.19	2.19	0.452	25	15.23	2.75	1	1	0.609	0.609
COADREAD	MYH1	88	354	3	439	3	0	2.84	1.42	4.26	0.017	100	19.36	0	2	0	0.5	0.5
COADREAD	MUC17	79	363	2	440	1	1	1.54	-0.77	1.54	0.314	50	17.73	4.59	1	0	0.438	0.438
COADREAD	SLC27A6	81	320	2	399	1	1	1.55	-1.55	1.55	0.451	50	20.05	3.95	1	0	0.438	0.451
COADREAD	DNAH2	268	182	2	448	2	0	0.92	0	1.85	0.35	100	59.38	0	1	0	0.875	0.875
COADREAD	PCDH15	93	357	3	447	2	1	2.71	0	2.71	0.104	66.67	20.36	7.68	1	0	0.578	0.578
COADREAD	TGIF1	58	140	2	196	2	0	4.88	0	4.88	0.0762	100	28.57	0	1	0	0.75	0.75
GBM	PCK2	141	224	3	362	1	2	0	-2.31	1.16	0.773	33.33	38.67	0.79	1	0	0.306	0.773
GBM	HIF3A	51	314	1	364	1	0	2.28	0	2.28	0.132	100	13.74	0	1	0	0.438	0.438
GBM	SVIL	265	100	1	364	1	0	0	0	1.38	0.691	100	72.53	0	1	0	0.75	0.75
GBM	TGM5	52	220	1	271	1	0	2.38	0	2.38	0.218	100	18.82	0	1	0	0.75	0.75
GBM	MYOM2	104	261	4	361	2	2	1.34	-1.34	2.69	0.343	50	28.25	2.51	1	0	0.306	0.343
GBM	EMR1	83	282	2	363	1	1	1.56	-1.56	1.56	0.399	50	22.59	3.4	1	0	0.438	0.438
GBM	RCBTB2	39	326	1	364	1	0	2.87	0	2.87	0.108	100	10.44	0	1	0	0.438	0.438
GBM	LAMA2	98	267	2	363	1	1	1.39	-1.39	1.39	0.348	50	26.72	2.72	1	0	0.438	0.438
GBM	IQGAP2	71	294	3	362	2	1	1.75	-0.87	3.5	0.219	66.67	19.06	8.28	1	0	0.578	0.578
GBM	USHBP1	77	281	1	357	1	0	1.65	0	1.65	0.204	100	21.29	0	1	0	0.75	0.75
GBM	PNLIP	231	134	1	364	1	0	1.18	0	1.18	0.479	100	63.19	0	1	0	0.75	0.75
GBM	SFXN3	233	131	2	362	2	0	1.19	0	2.39	0.388	100	63.81	0	1	0	0.875	0.875
GBM	PKD2L1	188	167	2	353	2	0	1.13	0	2.26	0.259	100	52.69	0	1	0	0.875	0.875
GBM	CLCNKA	45	277	2	320	1	1	2.58	0	2.58	0.25	50	13.75	6.16	1	0	0.438	0.438
GBM	PDE11A	58	307	1	364	1	0	2.05	0	2.05	0.142	100	15.66	0	1	0	0.75	0.75
GBM	VPREB3	45	311	1	355	1	0	2.54	0	2.54	0.135	100	12.39	0	1	0	0.75	0.75
GBM	SEMA4G	242	118	1	359	1	0	0	0	1.26	0.674	100	67.13	0	1	0	0.75	0.75
GBM	SLC10A2	38	317	2	353	1	1	2.95	0	2.95	0.154	50	10.48	8.34	1	0	0.438	0.438
GBM	MADD	65	300	1	364	1	0	1.87	0	1.87	0.16	100	17.58	0	1	0	0.75	0.75
GBM	YPEL1	56	273	1	328	1	0	2.15	0	2.15	0.203	100	16.77	0	1	0	0.75	0.75
GBM	PKD1L1	198	167	1	364	1	0	0	0	1.1	0.519	100	54.12	0	1	0	0.75	0.75
GBM	MYH4	53	223	3	273	1	2	0	-2.34	2.34	0.524	33.33	19.05	2.1	1	0	0.234	0.524
GBM	TEKT1	88	245	1	332	1	0	1.54	0	1.54	0.232	100	26.2	0	1	0	0.75	0.75
GBM	PKDREJ	72	191	1	262	1	0	1.91	0	1.91	0.218	100	27.1	0	1	0	0.75	0.75
GBM	CPXM2	211	154	1	364	1	0	0	0	1.12	0.514	100	57.69	0	1	0	0.75	0.75
GBM	MAPK11	94	271	1	364	1	0	1.43	0	1.43	0.263	100	25.55	0	1	0	0.75	0.75
GBM	NF1	49	316	1	364	1	0	2.36	0	2.36	0.125	100	13.19	0	1	0	0.75	0.75
GBM	ARHGAP21	143	154	1	296	1	0	1.35	0	1.35	0.457	100	47.97	0	1	0	0.75	0.75
GBM	GLI1	50	315	2	363	1	1	2.32	0	2.32	0.261	50	13.5	6.3	1	0	0.438	0.438
GBM	ESPL1	61	304	1	364	1	0	1.97	0	1.97	0.155	100	16.48	0	1	0	0.75	0.75
GBM	PNPLA6	113	252	1	364	1	0	1.28	0	1.28	0.291	100	30.77	0	1	0	0.75	0.75
GBM	ABCB5	136	229	2	363	1	1	0	-1.17	1.17	0.62	50	37.19	1.68	1	0	0.438	0.62
GBM	RGS3	41	232	1	272	1	0	2.87	0	2.87	0.14	100	14.71	0	1	0	0.75	0.75
GBM	ZNF471	98	266	1	363	1	0	1.4	0	1.4	0.276	100	26.72	0	1	0	0.75	0.75
GBM	SLC47A2	83	259	2	340	1	1	1.59	-1.59	1.59	0.326	50	24.12	3.12	1	0	0.438	0.438
GBM	ZNF107	50	307	1	356	1	0	2.33	0	2.33	0.145	100	13.76	0	1	0	0.75	0.75
GBM	COL17A1	266	99	1	364	1	0	0	0	0	1	100	72.8	0	1	0	0.75	1
GBM	SLC46A3	40	252	2	290	2	0	5.79	1.45	5.79	0.023	100	13.1	0	1	0	0.75	0.75
GBM	C10orf53	198	167	1	364	1	0	0	0	1.1	0.611	100	54.12	0	1	0	0.75	0.75
GBM	GSTO2	115	164	2	277	1	1	0	-1.48	1.48	0.632	50	41.16	1.43	1	0	0.438	0.632
GBM	CPT1C	44	314	1	357	1	0	2.59	0	2.59	0.133	100	12.04	0	1	0	0.75	0.75
GBM	VPS41	79	286	1	364	1	0	1.62	0	1.62	0.177	100	21.43	0	1	0	0.75	0.75
GBM	FLG2	49	284	1	332	1	0	2.39	0	2.39	0.244	100	14.46	0	1	0	0.75	0.75
GBM	RUFY1	55	310	1	364	1	0	2.14	0	2.14	0.12	100	14.84	0	1	0	0.75	0.75
GBM	ORC5	50	313	1	362	1	0	2.32	0	2.32	0.154	100	13.54	0	1	0	0.75	0.75
GBM	GALNS	40	305	1	344	1	0	2.83	0	2.83	0.109	100	11.34	0	1	0	0.75	0.75
GBM	COL19A1	78	287	2	363	1	1	1.63	-1.63	1.63	0.361	50	21.21	3.68	1	0	0.438	0.438
GBM	TXLNB	49	189	3	235	1	2	0	-2.57	2.57	0.576	33.33	20.43	1.93	1	1	0.75	0.75
GBM	FAM92B	45	299	2	342	1	1	2.56	-2.56	2.56	0.388	50	12.87	6.64	1	0	0.438	0.438
GBM	SLC15A3	46	318	2	362	1	1	2.49	0	2.49	0.215	50	12.43	6.91	1	0	0.438	0.438
GBM	FLG	49	287	3	333	1	2	2.39	-1.19	2.39	0.325	33.33	14.41	2.93	1	0	0.421	0.421
GBM	FSCN3	85	279	1	363	1	0	1.53	0	1.53	0.282	100	23.14	0	1	0	0.75	0.75
GBM	THNSL1	114	140	2	252	2	0	1.59	0	3.18	0.178	100	44.44	0	1	0	0.875	0.875
GBM	CPVL	112	253	1	364	1	0	1.29	0	1.29	0.32	100	30.49	0	1	0	0.75	0.75
GBM	OR9Q2	56	309	1	364	1	0	2.11	0	2.11	0.167	100	15.11	0	1	0	0.75	0.75
GBM	CASP7	211	154	1	364	1	0	0	0	1.12	0.512	100	57.69	0	1	0	0.75	0.75
GBM	OGDHL	201	164	1	364	1	0	0	0	1.11	0.503	100	54.95	0	1	0	0.75	0.75
GBM	OR52N2	46	319	2	363	1	1	2.49	0	2.49	0.184	50	12.4	6.93	1	0	0.438	0.438
GBM	KIF24	70	223	1	292	1	0	1.88	0	1.88	0.243	100	23.63	0	1	0	0.75	0.75
GBM	NIPSNAP3A	41	324	1	364	1	0	2.75	0	2.75	0.122	100	10.99	0	1	0	0.75	0.75
GBM	RYR1	100	264	1	363	1	0	1.38	0	1.38	0.261	100	27.27	0	1	0	0.75	0.75
GBM	ACBD7	177	142	1	318	1	0	0	0	1.27	0.533	100	55.35	0	1	0	0.75	0.75
GBM	ZNF33A	117	149	1	265	1	0	1.53	0	1.53	0.429	100	43.77	0	1	1	0.938	0.938
GBM	DUSP13	154	131	1	284	1	0	0	0	1.41	0.622	100	53.87	0	1	0	0.75	0.75
GBM	ABCA9	40	325	3	362	1	2	2.81	-1.4	2.81	0.269	33.33	10.77	4.06	1	0	0.438	0.438
GBM	LZTR1	107	258	1	364	1	0	1.32	0	1.32	0.268	100	29.12	0	1	0	0.75	0.75
GBM	CFTR	62	234	2	294	1	1	2.04	-2.04	2.04	0.345	50	20.75	3.77	1	0	0.438	0.438
GBM	ABCC2	201	164	1	364	1	0	1.11	0	1.11	0.496	100	54.95	0	1	0	0.75	0.75
GBM	ARHGAP19	77	288	1	364	1	0	1.65	0	1.65	0.29	100	20.88	0	1	0	0.75	0.75
HNSC	HHIPL2	92	379	2	469	1	1	0	-1.35	1.35	0.57	50	19.4	4.12	1	0	0.438	0.57
HNSC	PRUNE2	172	292	2	462	1	1	0	-0.92	0.92	0.592	50	37.01	1.7	1	0	0.438	0.592
HNSC	SHROOM1	83	383	2	464	2	0	2.93	0	2.93	0.0734	100	17.46	0	2	0	0.5	0.5
HNSC	ZWILCH	60	411	2	469	1	1	1.91	0	1.91	0.237	50	12.58	6.85	1	0	0.438	0.438
HNSC	NR1I3	59	384	2	441	1	1	1.96	0	1.96	0.235	50	13.15	6.51	1	1	0.938	0.938
HNSC	ASMT	66	367	2	431	1	1	1.79	0	1.79	0.243	50	15.08	5.56	1	0	0.438	0.438
HNSC	ESYT3	75	387	2	460	1	1	1.59	-0.8	1.59	0.312	50	16.09	5.16	1	0	0.438	0.438
HNSC	RPH3AL	105	328	2	431	1	1	1.26	-1.26	1.26	0.432	50	24.13	3.12	1	1	0.938	0.938
HNSC	PNPLA7	72	399	3	468	1	2	1.64	-1.64	1.64	0.368	33.33	15.17	2.77	1	1	0.938	0.938
HNSC	CCDC13	159	312	3	468	3	0	1.9	0	2.85	0.061	100	33.33	0	2	0	0.5	0.5
HNSC	PDZD3	128	277	2	403	1	1	0	-1.14	1.14	0.594	50	31.51	2.16	1	0	0.438	0.594
HNSC	NR1H3	74	397	2	469	1	1	1.6	-0.8	1.6	0.269	50	15.57	5.36	1	0	0.438	0.438
HNSC	GALT	129	342	2	469	1	1	1.07	-1.07	1.07	0.467	50	27.29	2.65	1	0	0.438	0.467
HNSC	DCHS2	127	344	3	468	1	2	0	-1.08	1.08	0.565	33.33	26.92	1.35	1	0	0.306	0.565
HNSC	ENTPD3	65	390	3	452	2	1	1.79	0	3.59	0.203	66.67	13.94	12	1	0	0.421	0.421
HNSC	SHPK	141	330	2	469	1	1	1.01	-1.01	1.01	0.373	50	29.85	2.34	1	0	0.438	0.438
HNSC	WRN	152	319	2	469	1	1	0	-0.97	0.97	0.534	50	32.2	2.1	1	0	0.438	0.534
HNSC	TPP1	135	336	3	468	1	2	0	-1.04	1.04	0.596	33.33	28.63	1.24	1	0	0.306	0.596
HNSC	MUC4	140	331	2	469	1	1	1.02	-1.02	1.02	0.468	50	29.64	2.36	1	0	0.438	0.468
HNSC	UBA7	136	253	2	387	1	1	0	-1.13	1.13	0.683	50	34.88	1.86	1	1	0.938	0.938
HNSC	ENO3	168	289	3	454	3	0	1.88	0	2.82	0.0457	100	36.34	0	1	0	0.875	0.875
HNSC	PLCD1	115	145	2	258	2	0	1.56	0	3.12	0.156	100	43.8	0	1	0	0.875	0.875
HNSC	SCRN2	81	390	2	469	1	1	1.49	-0.75	1.49	0.32	50	17.06	4.81	1	0	0.438	0.438
HNSC	CARD14	86	384	2	468	2	0	2.85	0	2.85	0.0317	100	17.95	0	1	0	0.875	0.875
HNSC	TNFRSF13B	96	374	3	467	2	1	2.62	0	2.62	0.0713	66.67	20.13	7.79	2	0	0.156	0.156
HNSC	COL7A1	152	319	2	469	1	1	0.97	-0.97	0.97	0.484	50	32.2	2.1	1	1	0.938	0.938
HNSC	FAM166A	128	343	2	469	1	1	1.07	-0.54	1.07	0.328	50	27.08	2.68	1	0	0.438	0.438
HNSC	DNAH8	143	328	5	466	4	1	3.01	0.5	4.02	0.0273	80	29.83	9.17	3	0	0.104	0.104
HNSC	TIRAP	134	324	2	456	1	1	0	-1.05	1.05	0.509	50	29.17	2.42	1	0	0.438	0.509
HNSC	DZIP1L	84	382	3	463	1	2	1.45	-1.45	1.45	0.448	33.33	17.93	2.27	1	0	0.306	0.448
HNSC	SLC4A7	151	316	2	465	1	1	0	-0.98	0.98	0.507	50	32.26	2.09	1	1	0.938	0.938
HNSC	C3orf20	172	298	2	468	1	1	0	-0.92	0.92	0.608	50	36.54	1.73	1	0	0.438	0.608
HNSC	TG	124	347	3	468	1	2	0	-1.64	1.09	0.627	33.33	26.28	1.4	1	1	0.75	0.75
HNSC	SIGLEC8	78	393	2	469	1	1	0	-1.54	1.54	0.55	50	16.42	5.04	1	1	0.75	0.75
HNSC	C9orf152	68	399	3	464	1	2	1.72	-1.72	1.72	0.383	33.33	14.44	2.93	1	0	0.306	0.383
HNSC	ZNF502	109	261	3	367	3	0	2.6	1.3	3.9	0.0199	100	28.88	0	2	0	0.688	0.688
KIRC	PCK2	88	242	5	325	2	3	1.55	-2.32	3.1	0.422	40	26.46	1.83	1	0	0.33	0.422
KIRC	STAB1	213	117	1	329	1	0	1.32	0	1.32	0.467	100	64.44	0	1	0	0.75	0.75
KIRC	ZFYVE26	53	277	1	329	1	0	2.25	0	2.25	0.2	100	15.81	0	1	0	0.75	0.75
KIRC	DNAH5	52	278	2	328	2	0	4.57	0	4.57	0.0502	100	15.24	0	2	0	0.5	0.5
KIRC	FLG	35	268	5	298	1	4	0	-4.85	3.23	0.597	20	11.41	1.91	1	0	0.19	0.597
KIRC	MYCBPAP	41	286	1	326	1	0	2.79	0	2.79	0.105	100	12.27	0	1	0	0.75	0.75
KIRC	THBS2	58	271	1	328	1	0	2.09	0	2.09	0.174	100	17.38	0	1	0	0.75	0.75
KIRC	NRAP	47	283	3	327	1	2	2.48	-2.48	2.48	0.411	33.33	14.07	3.01	1	1	0.75	0.75
KIRC	ANO10	73	221	2	292	2	0	3.64	0	3.64	0.0573	100	24.32	0	1	0	0.875	0.875
KIRC	FYCO1	190	140	1	329	1	0	0	0	1.24	0.614	100	57.45	0	1	0	0.75	0.75
KIRC	ABCA4	50	280	1	329	1	0	2.36	0	2.36	0.157	100	14.89	0	1	0	0.75	0.75
KIRC	CNTN6	150	175	2	323	2	0	1.24	0	2.48	0.227	100	45.82	0	1	0	0.75	0.75
KIRC	LTF	205	125	1	329	1	0	0	0	1.29	0.671	100	62.01	0	1	0	0.75	0.75
KIRC	DZIP3	59	271	1	329	1	0	2.06	0	2.06	0.167	100	17.63	0	1	0	0.75	0.75
KIRC	JAGN1	198	132	1	329	1	0	0	0	1.26	0.622	100	59.88	0	1	0	0.75	0.75
KIRC	BAP1	71	255	2	324	2	0	3.6	0	3.6	0.0777	100	21.3	0	3	0	0.312	0.312
KIRC	CACNA1S	39	291	1	329	1	0	2.91	0	2.91	0.213	100	11.55	0	1	0	0.75	0.75
KIRC	IQGAP2	52	278	1	329	1	0	2.28	0	2.28	0.334	100	15.5	0	1	0	0.75	0.75
KIRC	SEPT12	38	292	1	329	1	0	2.97	0	2.97	0.0834	100	11.25	0	1	0	0.75	0.75
LGG	DNAH2	166	298	3	461	1	2	0	-1.88	0.94	0.767	33.33	35.79	0.9	1	0	0.306	0.767
LGG	MYH3	72	374	2	444	1	1	1.66	-0.83	1.66	0.278	50	15.99	5.19	1	0	0.438	0.438
LGG	KIAA1324	81	383	2	462	1	1	1.5	-1.5	1.5	0.341	50	17.32	4.73	1	0	0.438	0.438
LGG	SLC7A9	93	257	2	348	1	1	0	-1.46	1.46	0.506	50	26.44	2.76	1	0	0.438	0.506
LGG	HKDC1	50	414	2	462	1	1	2.24	0	2.24	0.3	50	10.61	8.28	1	0	0.438	0.438
LGG	IL12RB2	67	397	2	462	1	1	1.74	-0.87	1.74	0.319	50	14.29	5.93	1	0	0.438	0.438
LGG	MSH4	139	325	2	462	1	1	0	-1.03	1.03	0.539	50	29.87	2.34	1	1	0.938	0.938
LGG	CAPN12	121	325	2	444	1	1	1.13	-1.13	1.13	0.473	50	27.03	2.69	1	0	0.75	0.75
LGG	CCDC42	58	346	2	402	2	0	4.03	2.01	4.03	0.013	100	13.93	0	1	0	0.75	0.75
LGG	C1orf174	97	367	2	462	1	1	1.3	-1.3	1.3	0.372	50	20.78	3.78	1	0	0.438	0.438
LGG	INADL	165	299	2	462	1	1	0	-0.94	0.94	0.641	50	35.5	1.81	1	0	0.438	0.641
LGG	CLCA2	137	327	2	462	1	1	0	-1.04	1.04	0.531	50	29.44	2.39	1	0	0.438	0.531
LGG	SLC5A9	75	389	2	462	2	0	3.18	0.8	3.18	0.024	100	15.8	0	1	0	0.875	0.875
LGG	TNFRSF13B	70	394	2	462	2	0	3.36	0	3.36	0.0467	100	14.72	0	2	0	0.5	0.5
LGG	PSG1	69	178	4	243	2	2	2.01	-2.01	4.02	0.369	50	27.57	2.58	2	0	0.0741	0.369
LIHC	CDRT15	36	228	1	263	1	0	3.22	0	3.22	0.125	100	13.31	0	1	0	0.75	0.75
LIHC	STAB1	45	219	2	262	1	1	2.68	-2.68	2.68	0.36	50	16.79	4.87	1	0	0.438	0.438
LIHC	C16orf71	62	202	1	263	1	0	2.11	0	2.11	0.202	100	23.19	0	1	0	0.75	0.75
LIHC	SLC7A7	35	229	1	263	1	0	3.29	0	3.29	0.161	100	12.93	0	1	0	0.75	0.75
LIHC	GABRR2	49	202	1	250	1	0	2.54	0	2.54	0.238	100	19.2	0	1	0	0.75	0.75
LIHC	PPOX	81	163	1	243	1	0	1.85	0	1.85	0.42	100	32.92	0	1	0	0.75	0.75
LIHC	GAMT	31	227	1	257	1	0	3.67	0	3.67	0.129	100	11.67	0	1	0	0.75	0.75
LIHC	ZNF596	34	82	1	115	1	0	4.16	0	4.16	0.328	100	28.7	0	1	0	0.75	0.75
LIHC	SFXN3	45	214	2	257	1	1	2.69	-2.69	2.69	0.354	50	17.12	4.76	1	0	0.438	0.438
LIHC	SLC39A2	31	233	1	263	1	0	3.65	0	3.65	0.183	100	11.41	0	1	0	0.75	0.75
LIHC	SEMA4A	53	169	1	221	1	0	2.48	0	2.48	0.295	100	23.53	0	1	0	0.75	0.75
LIHC	HFE	43	221	1	263	0	1	0	-2.78	0	1	0	16.35	0	1	0	0.438	1
LIHC	SEC31B	35	114	1	148	1	0	3.73	0	3.73	0.223	100	22.97	0	1	0	0.75	0.75
LIHC	CGN	74	190	2	262	1	1	1.88	-1.88	1.88	0.419	50	27.86	2.57	1	1	0.938	0.938
LIHC	PZP	47	217	1	263	0	1	0	-2.59	0	1	0	17.87	0	1	1	0.938	1
LIHC	ZNF347	28	234	1	261	1	0	4	0	4	0.0758	100	10.34	0	1	0	0.75	0.75
LIHC	NBN	66	143	1	208	1	0	2.21	0	2.21	0.385	100	31.25	0	1	0	0.75	0.75
LIHC	SYNJ2	57	195	1	251	1	0	2.27	0	2.27	0.226	100	22.31	0	1	0	0.75	0.75
LIHC	RPGRIP1L	34	150	1	183	1	0	3.61	0	3.61	0.0995	100	18.03	0	1	0	0.75	0.75
LIHC	MCEE	27	231	1	257	1	0	4.14	0	4.14	0.144	100	10.12	0	1	0	0.75	0.75
LIHC	FAM166A	34	230	1	263	1	0	3.38	0	3.38	0.14	100	12.55	0	1	0	0.75	0.75
LIHC	DNMBP	40	189	1	228	1	0	3.03	0	3.03	0.143	100	17.11	0	1	0	0.438	0.438
LIHC	ABHD12B	44	217	1	260	1	0	2.73	0	2.73	0.333	100	16.54	0	1	0	0.75	0.75
LIHC	CECR5	30	233	1	262	1	0	3.76	0	3.76	0.107	100	11.07	0	1	0	0.75	0.75
LIHC	RPH3AL	55	171	1	225	1	0	2.4	0	2.4	0.227	100	24	0	1	0	0.75	0.75
LIHC	APOA1BP	63	201	1	263	1	0	0	0	2.08	0.556	100	23.57	0	1	0	0.75	0.75
LIHC	KANK1	50	214	2	262	1	1	0	-2.47	2.47	0.661	50	18.7	4.28	1	1	0.938	0.938
LIHC	KCNAB3	67	196	1	262	1	0	2	0	2	0.354	100	25.19	0	1	0	0.75	0.75
LIHC	MED23	37	219	1	255	1	0	3.16	0	3.16	0.374	100	14.12	0	1	0	0.75	0.75
LIHC	DDX60	37	179	1	215	1	0	3.26	0	3.26	0.328	100	16.74	0	1	0	0.75	0.75
LIHC	HMCN1	91	173	2	262	1	1	0	-1.68	1.68	0.559	50	34.35	1.9	1	1	0.938	0.938
LIHC	CNDP1	39	225	2	262	1	1	3.01	-3.01	3.01	0.434	50	14.5	5.77	1	1	0.938	0.938
LIHC	TJP3	55	209	1	263	1	0	2.3	0	2.3	0.161	100	20.53	0	1	0	0.75	0.75
LIHC	NIPAL3	33	199	1	231	1	0	3.53	0	3.53	0.2	100	13.85	0	1	0	0.75	0.75
LIHC	OR2L13	51	141	1	191	1	0	2.67	0	2.67	0.264	100	26.18	0	1	0	0.75	0.75
LIHC	LRBA	45	219	1	263	1	0	2.68	0	2.68	0.236	100	16.73	0	1	0	0.75	0.75
LIHC	MIF4GD	32	232	1	263	1	0	3.56	0	3.56	0.151	100	11.79	0	1	0	0.75	0.75
LIHC	ALDH1L2	27	222	2	247	1	1	4.15	0	4.15	0.115	50	10.53	8.22	1	0	0.438	0.438
LIHC	KNG1	27	218	1	244	1	0	4.16	0	4.16	0.125	100	10.66	0	1	0	0.75	0.75
LIHC	FGL1	73	172	1	244	1	0	1.95	0	1.95	0.27	100	29.51	0	1	0	0.75	0.75
LIHC	TFIP11	33	230	2	261	1	1	3.47	0	3.47	0.194	50	12.26	6.97	1	1	0.938	0.938
LIHC	ACTR8	39	225	3	261	1	2	3.01	-3.01	3.01	0.457	33.33	14.56	2.88	1	0	0.306	0.457
LIHC	ALOX15B	129	133	1	261	1	0	0	0	1.53	0.778	100	49.04	0	1	0	0.75	0.778
LIHC	PTPRK	57	207	1	263	1	0	2.24	0	2.24	0.158	100	21.29	0	1	0	0.75	0.75
LIHC	AGPAT9	27	237	1	263	1	0	4.13	0	4.13	0.0748	100	9.89	0	1	0	0.75	0.75
LIHC	PTPRH	45	219	4	260	2	2	5.36	0	5.36	0.107	50	16.54	4.87	1	1	0.875	0.875
LUAD	ABCA10	82	442	3	521	1	2	0	-1.45	1.45	0.508	33.33	15.55	2.7	1	0	0.306	0.508
LUAD	CDCA2	117	407	4	520	1	3	0	-2.2	1.1	0.665	25	22.31	1.16	1	0	0.234	0.665
LUAD	SCLT1	56	468	3	521	1	2	2	-2	2	0.355	33.33	10.56	4.18	1	0	0.306	0.355
LUAD	MYH1	69	447	5	512	2	3	3.35	0	3.35	0.0942	40	13.09	6.48	1	1	0.875	0.875
LUAD	TGM6	81	443	3	521	2	1	2.92	0	2.92	0.0388	66.67	15.16	10.94	1	0	0.578	0.578
LUAD	USH2A	166	358	4	520	2	2	0.88	-0.88	1.76	0.355	50	31.54	2.16	2	0	0.0741	0.355
LUAD	TNFRSF10B	87	436	4	519	1	3	0	-1.38	1.38	0.551	25	16.57	1.67	1	1	0.609	0.609
LUAD	ASPM	114	410	5	519	1	4	0	-2.24	1.12	0.715	20	21.77	0.9	1	1	0.51	0.715
LUAD	ATM	61	463	3	521	2	1	3.71	0	3.71	0.0429	66.67	11.32	15.18	2	0	0.156	0.156
LUAD	ATP13A5	143	381	4	520	2	2	0.96	-0.96	1.92	0.299	50	27.12	2.66	1	2	0.995	0.995
LUAD	NLRP8	146	371	4	513	2	2	0.95	-0.95	1.91	0.357	50	28.07	2.54	2	0	0.0741	0.357
LUAD	ECM2	75	363	3	435	1	2	1.61	-1.61	1.61	0.45	33.33	17.01	2.42	1	1	0.75	0.75
LUAD	SMYD4	231	293	3	521	2	1	0.77	-0.77	1.55	0.406	66.67	43.95	2.54	1	0	0.578	0.578
LUAD	C9orf156	76	389	3	462	1	2	1.57	-1.57	1.57	0.431	33.33	16.23	2.56	1	1	0.75	0.75
LUAD	CCDC66	108	416	3	521	1	2	1.17	-1.17	1.17	0.45	33.33	20.54	1.93	1	0	0.306	0.45
LUAD	CNTN6	106	414	4	516	1	3	0	-1.78	1.18	0.572	25	20.35	1.3	1	0	0.234	0.572
LUAD	EXPH5	82	442	4	520	1	3	0	-1.45	1.45	0.534	25	15.58	1.8	1	0	0.234	0.534
LUSC	BRCA2	190	280	3	467	1	2	0	-1.77	0.88	0.817	33.33	40.47	0.74	1	0	0.438	0.817
LUSC	ENTPD4	117	268	3	382	2	1	1.23	-1.23	2.46	0.245	66.67	30.1	4.58	2	0	0.156	0.245
LUSC	TEP1	159	311	3	467	1	2	-0.95	-1.9	0	1	33.33	33.83	0.98	1	1	0.75	1
LUSC	FAM166A	139	331	4	466	3	1	2.04	0	3.06	0.0747	75	29.18	7.14	1	0	0.684	0.684
LUSC	DCHS2	204	266	3	467	1	2	0	-1.73	0.87	0.791	33.33	43.47	0.65	1	0	0.306	0.791
LUSC	MSH5	52	213	3	262	1	2	0	-2.39	2.39	0.526	33.33	19.47	2.05	1	0	0.306	0.526
LUSC	KRT24	79	251	3	327	1	2	0	-1.66	1.66	0.55	33.33	23.85	1.59	1	0	0.306	0.55
LUSC	COL19A1	107	363	4	466	1	3	0	-1.82	1.21	0.614	25	22.75	1.13	1	1	0.609	0.614
LUSC	PCDHAC1	143	236	3	376	1	2	0	-2.25	1.12	0.745	33.33	37.77	0.83	1	0	0.306	0.745
LUSC	ABCA8	71	378	3	446	1	2	1.67	-1.67	1.67	0.375	33.33	15.7	2.66	1	0	0.306	0.375
LUSC	HPS3	134	336	3	467	2	1	1.04	-0.52	2.09	0.193	66.67	28.27	5.01	1	0	0.438	0.438
LUSC	ZNF470	131	339	4	466	3	1	2.12	0	3.18	0.0838	75	27.47	7.76	2	1	0.844	0.844
LUSC	TRPM2	57	391	4	444	2	2	4.02	0	4.02	0.102	50	12.39	6.86	2	2	0.926	0.926
LUSC	FLG	90	347	6	431	2	4	1.4	-1.4	2.8	0.249	33.33	20.42	1.93	2	1	0.216	0.249
LUSC	ABCA9	79	391	4	466	1	3	0	-1.52	1.52	0.538	25	16.74	1.65	1	0	0.234	0.538
OV	BRCA1	177	129	24	283	23	1	12.06	6.03	17.42	1.6e-05	95.83	54.42	0	24	0	5.25e-06	1.6e-05
OV	TTC5	78	281	2	357	1	1	1.64	-1.64	1.64	0.388	50	21.57	3.6	1	1	0.938	0.938
OV	CCDC38	132	221	3	350	2	1	1.21	-1.21	2.42	0.413	66.67	37.14	3.35	2	0	0.156	0.413
OV	BRCA2	186	175	23	338	20	3	8.87	3.88	13.31	0.00034	86.96	49.11	6.27	19	1	1.04e-07	0.00034
OV	DNAH10	169	192	3	358	1	2	-1.11	-2.23	1.11	0.931	33.33	46.93	0.57	1	1	0.75	0.931
OV	FAM166A	62	270	3	329	1	2	1.98	-1.98	1.98	0.391	33.33	18.54	2.18	1	1	0.938	0.938
OV	CHIT1	82	279	2	359	1	1	1.58	-1.58	1.58	0.424	50	22.56	3.4	1	1	0.938	0.938
OV	CCKBR	156	205	2	359	2	0	1.13	0	2.26	0.208	100	42.9	0	2	0	0.5	0.5
OV	GBP7	39	287	2	324	2	0	5.83	2.91	5.83	0.00645	100	11.42	0	2	0	0.5	0.5
OV	NLRP8	150	206	2	354	2	0	1.15	0	2.3	0.196	100	41.81	0	2	0	0.5	0.5
OV	DHTKD1	80	281	2	359	2	0	3.21	0	3.21	0.04	100	21.73	0	2	0	0.5	0.5
OV	MBD4	45	146	3	188	2	1	2.91	0	5.81	0.16	66.67	22.87	6.49	1	1	0.984	0.984
OV	ABCA10	187	174	5	356	4	1	1.11	-1.11	3.88	0.191	80	51.4	3.72	2	0	0.688	0.688
OV	MUC17	109	249	5	353	3	2	2.64	0	3.96	0.075	60	30.03	3.43	2	0	0.132	0.132
OV	BRIP1	187	173	2	358	2	0	1.11	0	2.23	0.322	100	51.68	0	2	0	0.5	0.5
OV	POLK	66	100	2	164	1	1	0	-2.52	2.52	0.609	50	39.63	1.52	1	1	0.938	0.938
OV	C6	42	319	5	356	2	3	5.39	0	5.39	0.117	40	11.24	5.06	2	3	0.957	0.957
OV	ABCA9	173	188	6	356	3	3	1.11	-1.11	3.33	0.368	50	47.75	1.63	3	0	0.312	0.368
PRAD	TRAPPC9	50	405	1	454	1	0	2.25	0	2.25	0.122	100	10.79	0	1	0	0.75	0.75
PRAD	MYOM2	175	282	1	456	1	0	0.93	0	0.93	0.411	100	38.16	0	1	0	0.75	0.75
PRAD	EPHX2	112	294	1	405	1	0	1.23	0	1.23	0.282	100	27.41	0	1	0	0.75	0.75
PRAD	PNLDC1	55	402	1	456	1	0	2.07	0	2.07	0.0946	100	11.84	0	1	0	0.75	0.75
PRAD	GPS2	112	344	1	455	1	0	1.18	0	1.18	0.178	100	24.4	0	1	0	0.75	0.75
PRAD	FREM2	126	330	2	454	1	1	1.1	-1.1	1.1	0.463	50	27.53	2.62	1	0	0.438	0.463
PRAD	FAM92B	81	346	1	426	1	0	1.52	0	1.52	0.202	100	18.78	0	1	0	0.75	0.75
PRAD	ALOX15B	83	363	1	445	0	1	0	-1.48	0	1	0	18.65	0	1	0	0.438	1
SKCM	ASB15	60	372	3	429	1	2	1.94	-0.97	1.94	0.278	33.33	13.75	3.1	1	1	0.75	0.75
SKCM	HDHD3	121	327	2	446	1	1	1.13	-1.13	1.13	0.456	50	26.91	2.7	1	0	0.438	0.456
SKCM	FAM120B	92	350	2	440	1	1	1.37	-1.37	1.37	0.435	50	20.68	3.8	1	0	0.438	0.438
SKCM	TEX14	74	381	2	453	2	0	3.23	0.81	3.23	0.0271	100	15.89	0	1	0	0.875	0.875
SKCM	HSPA8	73	170	2	241	1	1	0	-1.96	1.96	0.561	50	29.88	2.33	1	1	0.938	0.938
SKCM	NBPF3	64	391	2	453	1	1	1.82	-0.91	1.82	0.281	50	13.91	6.11	1	0	0.75	0.75
SKCM	ITGA7	78	360	2	436	1	1	1.56	-1.56	1.56	0.328	50	17.66	4.62	1	1	0.938	0.938
SKCM	MUC17	88	365	4	449	2	2	1.41	-0.71	2.82	0.16	50	19.15	4.15	2	0	0.0741	0.16
SKCM	FLG	98	323	5	416	1	4	0	-2.66	1.33	0.774	20	23.32	0.82	1	1	0.51	0.774
SKCM	OVGP1	90	239	3	326	2	1	1.53	-0.76	3.06	0.191	66.67	26.99	5.31	1	0	0.578	0.578
SKCM	NEBL	109	346	2	453	1	1	1.21	-1.21	1.21	0.412	50	23.84	3.17	1	0	0.438	0.438
SKCM	NLRP2	86	357	3	440	1	2	1.44	-1.44	1.44	0.487	33.33	19.32	2.08	1	1	0.75	0.75
SKCM	ZNF701	64	387	2	449	0	2	0	-3.64	0	1	0	14.25	0	1	0	0.306	1
SKCM	F12	70	366	2	434	1	1	1.7	-1.7	1.7	0.324	50	15.9	5.23	1	0	0.75	0.75
SKCM	C14orf159	64	391	2	453	1	1	1.82	-0.91	1.82	0.279	50	13.91	6.11	1	0	0.438	0.438
SKCM	SYNJ2	152	297	2	447	2	0	0.99	0	1.99	0.125	100	33.56	0	2	0	0.5	0.5
SKCM	PDE5A	54	391	2	443	1	1	2.11	0	2.11	0.227	50	11.96	7.24	1	0	0.306	0.306
SKCM	FLCN	80	360	2	438	2	0	3.06	1.53	3.06	0.0133	100	17.81	0	1	0	0.875	0.875
SKCM	MSH3	64	391	2	453	1	1	1.82	-0.91	1.82	0.293	50	13.91	6.11	2	0	0.156	0.293
SKCM	PLA2R1	55	394	3	446	1	2	2.07	-2.07	2.07	0.336	33.33	12.11	3.58	1	1	0.75	0.75
SKCM	C17orf80	95	360	3	452	2	1	1.33	0	2.66	0.123	66.67	20.58	7.58	1	0	0.578	0.578
SKCM	TMPRSS3	71	373	3	441	1	2	1.68	-1.68	1.68	0.393	33.33	15.87	2.63	1	0	0.306	0.393
SKCM	VWA2	153	302	2	453	1	1	0	-0.98	0.98	0.558	50	33.55	1.97	1	0	0.306	0.558
SKCM	COL19A1	146	309	3	452	2	1	1.01	-1.01	2.02	0.25	66.67	31.86	4.23	1	0	0.438	0.438
SKCM	SLC45A2	48	407	2	453	1	1	2.33	0	2.33	0.191	50	10.38	8.48	1	0	0.438	0.438
SKCM	CGNL1	63	392	2	453	1	1	1.84	0	1.84	0.265	50	13.69	6.22	1	0	0.438	0.438
SKCM	SLC27A5	52	400	3	449	2	1	4.35	0	4.35	0.032	66.67	11.14	15.38	1	1	0.984	0.984
SKCM	ABCC12	56	399	2	453	1	1	2.04	-1.02	2.04	0.27	50	12.14	7.12	1	0	0.306	0.306
SKCM	CASP5	161	285	3	443	2	1	0.97	-0.97	1.94	0.3	66.67	35.89	3.54	2	0	0.156	0.3
SKCM	ADH4	55	399	2	452	1	1	2.07	0	2.07	0.141	50	11.95	7.25	1	1	0.938	0.938
SKCM	OTOF	66	389	3	452	1	2	1.77	-1.77	1.77	0.396	33.33	14.38	2.95	1	2	0.972	0.972
SKCM	CFTR	55	288	3	340	1	2	2.17	-2.17	2.17	0.36	33.33	15.88	2.62	1	1	0.75	0.75
SKCM	PLEKHA1	76	363	2	437	1	1	1.59	-0.8	1.59	0.307	50	17.16	4.78	1	0	0.438	0.438
SKCM	SLAMF8	93	362	3	452	2	1	2.7	0	2.7	0.0951	66.67	20.13	7.78	1	0	0.578	0.578
SKCM	UMODL1	87	368	2	453	1	1	1.42	-1.42	1.42	0.497	50	18.98	4.23	1	1	0.938	0.938
SKCM	OR1J2	157	290	2	445	1	1	0	-0.98	0.98	0.561	50	35.06	1.85	1	0	0.438	0.561
STAD	FER1L6	70	300	2	368	1	1	1.76	-1.76	1.76	0.497	50	18.75	4.29	1	0	0.438	0.497
STAD	MYOM2	164	207	2	369	1	1	0	-1.09	1.09	0.709	50	44.17	1.26	1	0	0.438	0.709
STAD	ISX	51	318	3	366	2	1	4.55	0	4.55	0.0338	66.67	13.39	12.47	1	0	0.578	0.578
STAD	CDH17	81	290	2	369	1	1	1.58	-1.58	1.58	0.327	50	21.68	3.58	1	0	0.438	0.438
STAD	AOX1	74	297	2	369	1	1	1.69	-1.69	1.69	0.38	50	19.78	4.01	1	0	0.438	0.438
STAD	DUOX2	39	332	2	369	1	1	2.87	-2.87	2.87	0.468	50	10.3	8.51	1	0	0.438	0.468
STAD	CELA2A	76	295	2	369	1	1	1.65	-1.65	1.65	0.338	50	20.33	3.88	1	1	0.938	0.938
STAD	EIF2B1	64	307	2	369	1	1	1.89	-0.94	1.89	0.297	50	17.07	4.8	1	1	0.938	0.938
STAD	F12	56	282	4	334	1	3	2.14	-2.14	2.14	0.476	25	16.47	1.68	1	0	0.234	0.476
STAD	HFE	97	274	2	369	1	1	1.4	-0.7	1.4	0.314	50	26.02	2.82	1	0	0.438	0.438
STAD	FLG	68	283	4	347	0	4	-1.82	-3.65	0	1	0	19.6	0	1	0	0.16	1
STAD	ARAP2	45	326	2	369	1	1	2.53	0	2.53	0.235	50	11.92	7.24	1	0	0.438	0.438
STAD	HRNR	43	328	3	368	0	3	0	-3.95	0	1	0	11.68	0	1	0	0.234	1
STAD	BCL2L12	49	322	2	369	1	1	2.35	0	2.35	0.25	50	13.01	6.57	1	1	0.938	0.938
STAD	SLCO6A1	60	261	2	319	1	1	2.05	-1.02	2.05	0.324	50	18.5	4.35	1	0	0.438	0.438
STAD	TLN2	83	288	2	369	1	1	1.55	-1.55	1.55	0.469	50	22.22	3.47	1	0	0.75	0.75
STAD	NLRP8	79	289	2	366	1	1	1.61	-1.61	1.61	0.394	50	21.31	3.66	1	0	0.306	0.394
STAD	CES5A	57	314	2	369	1	1	2.07	-2.07	2.07	0.404	50	15.18	5.51	1	0	0.438	0.438
STAD	NBN	46	222	2	266	1	1	2.62	-1.31	2.62	0.314	50	16.92	4.83	1	1	0.938	0.938
STAD	FANCA	105	245	2	348	1	1	0	-1.36	1.36	0.587	50	29.89	2.33	1	0	0.438	0.587
STAD	CAPN9	64	282	3	343	2	1	3.83	0	3.83	0.0729	66.67	18.08	8.81	2	0	0.156	0.156
STAD	HAL	88	283	2	369	1	1	1.49	-1.49	1.49	0.382	50	23.58	3.22	1	0	0.438	0.438
STAD	ACACB	80	291	2	369	2	0	1.59	0	3.19	0.09	100	21.14	0	2	0	0.5	0.5
STAD	ALOXE3	136	234	2	368	1	1	0	-1.16	1.16	0.603	50	36.68	1.72	1	0	0.438	0.603
STAD	MUC4	101	270	3	368	1	2	0	-1.36	1.36	0.614	33.33	27.17	1.34	1	0	0.306	0.614
STAD	GANC	52	319	4	367	1	3	2.24	-2.24	2.24	0.434	25	13.9	2.04	1	0	0.234	0.434
STAD	CLEC10A	149	222	2	369	2	0	1.12	0	2.24	0.144	100	39.84	0	2	0	0.5	0.5
STAD	PLB1	77	294	2	369	2	0	3.28	0	3.28	0.0452	100	20.33	0	1	0	0.875	0.875
STAD	ACO1	63	298	2	359	1	1	1.92	-0.96	1.92	0.316	50	17.27	4.73	1	0	0.438	0.438
STAD	CNDP2	87	284	2	369	2	0	3	0	3	0.049	100	23.04	0	1	0	0.75	0.75
STAD	PPFIBP1	62	309	3	368	1	2	1.94	-1.94	1.94	0.455	33.33	16.58	2.49	1	1	0.75	0.75
STAD	VIT	40	323	2	361	1	1	2.81	0	2.81	0.23	50	10.8	8.07	1	0	0.438	0.438
STAD	ITGAE	157	214	2	369	1	1	0	-1.1	1.1	0.665	50	42.28	1.36	1	1	0.938	0.938
UCEC	HIST1H4B	47	367	1	413	1	0	2.4	0	2.4	0.123	100	11.14	0	1	0	0.75	0.75
UCEC	USH2A	139	307	2	444	2	0	1.05	0	2.09	0.103	100	30.86	0	1	0	0.875	0.875
UCEC	TRIM16L	85	357	2	440	1	1	1.46	-1.46	1.46	0.331	50	19.09	4.2	1	0	0.438	0.438
UCEC	SCEL	52	394	1	445	1	0	2.18	0	2.18	0.111	100	11.46	0	1	0	0.75	0.75
UCEC	MYO1C	101	345	1	445	1	0	1.28	0	1.28	0.223	100	22.47	0	1	0	0.75	0.75
UCEC	PDGFRL	57	389	2	445	1	1	2.01	0	2.01	0.328	50	12.58	0	1	0	0.75	0.75
UCEC	CAMKK1	113	333	1	445	1	0	1.19	0	1.19	0.182	100	25.17	0	1	0	0.75	0.75
UCEC	REN	89	353	1	441	1	0	1.41	0	1.41	0.206	100	19.95	0	1	0	0.75	0.75
UCEC	SPRR1A	58	339	1	396	1	0	2.02	0	2.02	0.135	100	14.39	0	1	0	0.75	0.75
UCEC	SEPT4	91	347	1	437	1	0	1.39	0	1.39	0.198	100	20.59	0	1	0	0.75	0.75
UCEC	MCTP1	46	391	1	436	1	0	2.43	0	2.43	0.195	100	10.32	0	1	0	0.875	0.875
UCEC	FLG	102	318	7	414	3	4	2.59	-0.65	3.88	0.14	42.86	23.91	3.12	2	0	0.0523	0.14
UCEC	FLG2	99	320	1	418	1	0	1.32	0	1.32	0.4	100	23.44	0	1	0	0.75	0.75
UCEC	MYH1	46	396	2	440	0	2	0	-2.43	0	1	0	10.45	0	1	0	0.306	1
UCEC	ASB16	65	373	1	437	1	0	1.81	0	1.81	0.114	100	14.65	0	1	0	0.75	0.75
UCEC	MYH4	73	256	2	327	1	1	1.76	-1.76	1.76	0.456	50	22.02	3.51	1	0	0.438	0.456
UCEC	TEKT1	99	314	1	412	1	0	1.33	0	1.33	0.24	100	23.79	0	1	0	0.75	0.75
UCEC	CWF19L1	80	366	1	445	1	0	1.52	0	1.52	0.143	100	17.75	0	1	0	0.75	0.75
UCEC	TIMELESS	52	394	2	444	1	1	2.18	0	2.18	0.266	50	11.49	7.58	1	0	0.438	0.438
UCEC	MEFV	66	378	1	443	1	0	1.78	0	1.78	0.445	100	14.67	0	1	0	0.75	0.75
UCEC	TM4SF5	148	298	1	445	1	0	1.01	0	1.01	0.306	100	33.03	0	1	0	0.75	0.75
UCEC	ALOXE3	113	332	2	443	1	1	1.19	-1.19	1.19	0.432	50	25.28	2.94	1	0	0.438	0.438
UCEC	LRP1B	81	365	1	445	1	0	1.51	0	1.51	0.157	100	17.98	0	1	0	0.75	0.75
UCEC	TMEM180	112	327	2	437	2	0	2.4	0	2.4	0.0705	100	25.17	0	1	0	0.875	0.875
UCEC	CES5A	84	362	2	444	1	1	0	-1.47	1.47	0.717	50	18.69	4.31	1	0	0.438	0.717
UCEC	SLIT1	53	392	1	444	1	0	2.14	0	2.14	0.332	100	11.71	0	1	0	0.75	0.75
UCEC	SURF1	75	371	1	445	1	0	1.6	0	1.6	0.273	100	16.63	0	1	0	0.75	0.75
UCEC	NBAS	72	374	1	445	0	1	0	-1.66	0	1	0	16.18	0	1	0	0.306	1
UCEC	BRCA1	67	320	2	385	2	0	3.61	0	3.61	0.0443	100	16.88	0	2	0	0.5	0.5
UCEC	OR5H1	46	392	1	437	1	0	2.43	0	2.43	0.105	100	10.3	0	1	0	0.75	0.75
UCEC	WDR41	54	390	1	443	0	1	0	-2.11	0	1	0	12.19	0	1	0	0.438	1
UCEC	CUBN	93	353	3	443	1	2	0	-1.36	1.36	0.535	33.33	20.77	1.9	1	0	0.306	0.535
UCEC	PROCA1	56	374	1	429	1	0	2.05	0	2.05	0.155	100	12.82	0	1	0	0.75	0.75
UCEC	WNK1	59	387	1	445	1	0	1.95	0	1.95	0.273	100	13.03	0	1	0	0.75	0.75
UCEC	KRT24	50	275	2	323	1	1	2.36	0	2.36	0.219	50	15.17	5.5	1	0	0.438	0.438
UCEC	GANC	56	390	3	443	2	1	4.08	1.02	4.08	0.0288	66.67	12.19	13.93	2	0	0.156	0.156
UCEC	LILRB4	57	389	2	444	1	1	2.01	0	2.01	0.22	50	12.61	6.82	1	0	0.438	0.438
UCEC	NIPSNAP3A	70	376	1	445	1	0	1.69	0	1.69	0.184	100	15.51	0	1	0	0.75	0.75
UCEC	MOV10L1	118	328	3	443	1	2	0	-1.73	1.15	0.645	33.33	26.41	1.39	1	1	0.75	0.75
UCEC	TNFRSF13B	62	382	1	443	1	0	1.87	0	1.87	0.139	100	13.77	0	1	0	0.75	0.75
UCEC	ZFYVE26	57	388	1	444	1	0	2.01	0	2.01	0.0837	100	12.61	0	1	0	0.75	0.75
UCEC	TJP2	64	382	1	445	1	0	1.82	0	1.82	0.206	100	14.16	0	1	0	0.75	0.75
UCEC	COL15A1	72	357	3	426	1	2	1.67	-1.67	1.67	0.453	33.33	16.67	2.48	1	0	0.438	0.453
UCEC	TAF2	73	327	1	399	1	0	1.68	0	1.68	0.176	100	18.05	0	1	0	0.75	0.75
UCEC	ATAD5	49	285	1	333	1	0	2.39	0	2.39	0.114	100	14.41	0	1	0	0.75	0.75
UCEC	KIF27	47	355	2	401	0	2	0	-2.41	0	1	0	11.72	0	1	0	0.438	1
UCEC	NR1I3	82	330	1	411	1	0	1.52	0	1.52	0.206	100	19.71	0	1	0	0.75	0.75
UCEC	DDX52	67	379	3	443	1	2	1.76	-1.76	1.76	0.411	33.33	14.9	2.83	1	0	0.234	0.411
UCEC	WDR11	87	313	1	399	1	0	1.47	0	1.47	0.192	100	21.55	0	1	0	0.75	0.75
UCEC	GPR97	95	350	1	444	1	0	1.34	0	1.34	0.177	100	21.17	0	1	0	0.75	0.75
UCEC	SLC18A1	54	391	1	444	1	0	2.11	0	2.11	0.181	100	11.94	0	1	0	0.75	0.75
UCEC	ABCA8	50	374	2	422	1	1	2.27	0	2.27	0.136	50	11.61	7.48	1	1	0.75	0.75
UCEC	ABCA9	58	387	3	442	2	1	3.97	0	3.97	0.0507	66.67	12.67	13.34	1	0	0.438	0.438
