# Supplementary material for: Systematic discovery of germline cancer predisposition genes through the identification of somatic second hits
Source: Nat Commun. 2018 Jul 4;9:2601. doi: 10.1038/s41467-018-04900-7 (PMC6031629; doi:10.1038/s41467-018-04900-7)
Supplement: Supplementary file 16 — Supplementary Data 14 [file 41467_2018_4900_MOESM16_ESM.xlsx]

## Sheet: Sheet1
Supplementary Data 14. Known cancer predisposition genes (CPGs) used in this study.
Gene	Data from Rahman (Rahman, 2014)	Data from Cancer Gene Census (Futreal et al, 2004)
COL7A1	Yes	No
XPA	Yes	Yes
PHOX2B	Yes	Yes
APC	Yes	Yes
FANCF	No	Yes
FANCE	No	Yes
SBDS	Yes	Yes
PTCH1	Yes	No
PTPN11	Yes	No
MPL	No	Yes
CDC73	Yes	No
HOXB13	No	Yes
ATM	Yes	Yes
BRIP1	Yes	Yes
PALB2	Yes	Yes
PRF1	No	Yes
CDKN1B	Yes	No
TMEM127	Yes	No
BRCA1	Yes	Yes
BRCA2	Yes	Yes
MEN1	Yes	Yes
SUFU	Yes	Yes
ITK	Yes	No
KIT	Yes	Yes
SLC25A13	Yes	No
SMARCE1	Yes	Yes
GPC3	Yes	Yes
MTAP	Yes	No
ELANE	Yes	No
PDGFRA	Yes	No
TGFBR1	Yes	No
SMARCA4	Yes	No
GBA	Yes	No
SH2D1A	Yes	No
SMAD4	Yes	No
SOS1	Yes	No
BUB1B	Yes	Yes
FANCG	Yes	Yes
FANCC	Yes	Yes
FANCA	Yes	Yes
NBN	Yes	No
SDHC	Yes	Yes
RET	Yes	Yes
HMBS	Yes	No
RUNX1	Yes	No
RHBDF2	Yes	No
FAH	Yes	No
TSHR	No	Yes
GJB2	Yes	No
EXT2	Yes	Yes
FANCD2	No	Yes
WT1	Yes	Yes
POLD1	Yes	No
DICER1	Yes	Yes
FLCN	Yes	No
CHEK2	Yes	Yes
KCNJ5	No	Yes
POLE	Yes	No
BMPR1A	Yes	Yes
SDHA	Yes	No
BAP1	Yes	No
SDHB	Yes	Yes
SDHD	Yes	Yes
POLH	Yes	No
CDKN2A	Yes	Yes
MSH2	Yes	Yes
MSH6	Yes	Yes
PRKAR1A	Yes	Yes
PMS1	No	Yes
PMS2	Yes	Yes
SERPINA1	Yes	No
NF2	Yes	Yes
NF1	Yes	Yes
TSC1	Yes	Yes
HRAS	Yes	Yes
TERT	Yes	Yes
VHL	Yes	Yes
WRN	Yes	Yes
GATA2	Yes	No
UROD	Yes	No
FH	Yes	Yes
ERCC2	Yes	Yes
ERCC3	Yes	Yes
ERCC4	Yes	Yes
EXT1	Yes	Yes
SMARCB1	Yes	Yes
MLH1	Yes	Yes
AXIN2	Yes	No
AXIN1	No	Yes
BLM	Yes	Yes
CDK4	Yes	Yes
HFE	Yes	No
TRIM37	Yes	No
TSC2	Yes	Yes
DDB2	Yes	Yes
TP53	Yes	Yes
WAS	Yes	No
MAX	Yes	Yes
DKC1	Yes	No
EGFR	Yes	Yes
CDH1	Yes	Yes
PRSS1	Yes	No
RB1	Yes	Yes
RAD51C	Yes	Yes
MUTYH	Yes	Yes
CBL	Yes	No
ALK	Yes	Yes
SDHAF2	Yes	No
STAT3	Yes	No
HNF1A	No	Yes
